# Supplementary material for: Mesenchymal stromal cell activation by breast cancer secretomes in bioengineered 3D microenvironments
Source: Life Sci Alliance. 2019 Jun 3;2(3):e201900304. doi: 10.26508/lsa.201900304 (PMC6549139; doi:10.26508/lsa.201900304)
Supplement: Supplementary file 1 [file LSA-2019-00304_TableS1.xlsx]

## Sheet: Supplementary Table 1a
Supplementary Table 1 - Mass spectrometry-based proteomic analysis of breast cancer cell secretomes
MDA-WT vs MCF7
										LFQ intensity
										MCF7			MDA_WT
Protein IDs	Majority protein IDs	Protein names	Gene names	Matrisome	Division	Category	Exosome	log2(MDA-WT/MCF7)	p value (MDA-WT vs MCF7)	R1	R2	R3	R1	R2	R3
P03956	P03956	Interstitial collagenase;22 kDa interstitial collagenase;27 kDa interstitial collagenase	MMP1	YES	Matrisome-associated	ECM Regulators	-	10.0661	1.23015e-09	25.047	22.9854	22.4003	33.6998	34.2862	32.645
P05121;P05121-2	P05121;P05121-2	Plasminogen activator inhibitor 1	SERPINE1	YES	Matrisome-associated	ECM Regulators	YES	7.39558	3.73298e-09	26.2886	25.6046	23.8737	33.3395	32.6181	31.9959
P06703	P06703	Protein S100-A6	S100A6	YES	Matrisome-associated	Secreted Factors	YES	6.74171	5.15894e-07	26.6661	25.7514	22.938	31.4904	31.8259	32.2645
Q08380	Q08380	Galectin-3-binding protein	LGALS3BP	-	-	-	YES	5.76995	7.65402e-13	28.1282	27.9907	28.0815	33.8097	33.9615	33.739
P01892;P10316;P30459;P01891;P10314;P30453;P16190;P16189;P30512;P30457;P30456;P30450;P18462;Q09160	P01892;P10316;P30459;P01891	HLA class I histocompatibility antigen, A-2 alpha chain;HLA class I histocompatibility antigen, A-69 alpha chain;HLA class I histocompatibility antigen, A-74 alpha chain;HLA class I histocompatibility antigen, A-68 alpha chain	HLA-A	-	-	-	-	5.29633	4.47546e-07	25.1786	26.7993	23.3858	30.2137	30.3792	30.6598
Q06481;Q06481-2;Q06481-3;Q06481-6;Q06481-4;Q06481-5	Q06481;Q06481-2;Q06481-3;Q06481-6;Q06481-4;Q06481-5	Amyloid-like protein 2	APLP2	-	-	-	YES	5.2811	7.58362e-10	26.0085	25.5145	24.6667	30.4688	30.5613	31.0028
P24821;P24821-3;P24821-5;P24821-6	P24821;P24821-3;P24821-5;P24821-6	Tenascin	TNC	YES	Core matrisome	ECM Glycoproteins	-	4.88882	1.73955e-05	23.8407	28.0965	25.2359	31.0312	30.6755	30.1328
Q92626;Q92626-2	Q92626	Peroxidasin homolog	PXDN	YES	Core matrisome	ECM Glycoproteins	YES	4.35869	3.54209e-05	26.0999	26.9869	23.4192	30.1487	30.3023	29.1311
Q8WX77	Q8WX77	Insulin-like growth factor-binding protein-like 1	IGFBPL1	YES	Core matrisome	ECM Glycoproteins	-	4.28262	2.42521e-08	23.7842	24.7569	24.4237	29.1758	28.546	28.0908
P42785;P42785-2	P42785;P42785-2	Lysosomal Pro-X carboxypeptidase	PRCP	-	-	-	YES	4.20631	3.77637e-07	25.4421	25.5118	23.5475	29.6354	29.0515	28.4334
P05067-7;P05067-11;P05067-8;P05067-9;P05067;P05067-3;P05067-4;P05067-5;P05067-6;P05067-10;P05067-2	P05067-7;P05067-11;P05067-8;P05067-9;P05067;P05067-3;P05067-4;P05067-5;P05067-6;P05067-10	Amyloid beta A4 protein;N-APP;Soluble APP-alpha;Soluble APP-beta;C99;Beta-amyloid protein 42;Beta-amyloid protein 40;C83;P3(42);P3(40);C80;Gamma-secretase C-terminal fragment 59;Gamma-secretase C-terminal fragment 57;Gamma-secretase C-terminal fragment 50;C31	APP	-	-	-	YES	4.03088	4.8288e-09	28.802	29.1946	28.7801	32.5105	33.1066	33.2522
O00391;O00391-2;Q8WWX9	O00391;O00391-2	Sulfhydryl oxidase 1	QSOX1	-	-	-	YES	3.91938	5.51015e-11	30.3856	30.4547	29.9747	34.2502	34.2437	34.0793
P17936;P17936-2	P17936;P17936-2	Insulin-like growth factor-binding protein 3	IGFBP3	YES	Core matrisome	ECM Glycoproteins	-	3.89657	6.60316e-08	26.6342	25.0446	26.1395	29.8181	29.8267	29.8632
P02751-17;P02751-3;P02751;P02751-6;P02751-5;P02751-10;P02751-9;P02751-14;P02751-8;P02751-7;P02751-15;P02751-13;P02751-11;P02751-4;P02751-12;P02751-16;P02751-2	P02751-17;P02751-3;P02751;P02751-6;P02751-5;P02751-10;P02751-9;P02751-14;P02751-8;P02751-7;P02751-15;P02751-13;P02751-11;P02751-4;P02751-12	Fibronectin;Anastellin;Ugl-Y1;Ugl-Y2;Ugl-Y3	FN1	YES	Core matrisome	ECM Glycoproteins	YES	3.89613	2.05182e-08	27.7794	28.6952	28.6806	32.5015	32.3443	31.9978
Q99715-4;Q99715;Q99715-2	Q99715-4;Q99715	Collagen alpha-1(XII) chain	COL12A1	YES	Core matrisome	Collagens	YES	3.87668	1.15227e-06	26.6276	27.6879	25.8992	30.8024	30.9551	30.0872
P12109	P12109	Collagen alpha-1(VI) chain	COL6A1	YES	Core matrisome	Collagens	YES	3.7507	3.01571e-09	26.1467	26.9629	26.3892	30.0441	30.2574	30.4493
P15151-3;P15151-2;P15151-4;P15151	P15151-3;P15151-2;P15151-4;P15151	Poliovirus receptor	PVR	-	-	-	-	3.68949	0.00023158	25.8706	27.2596	23.6973	28.5174	29.0487	30.33
P40121;P40121-2	P40121;P40121-2	Macrophage-capping protein	CAPG	-	-	-	YES	3.55889	9.67228e-06	26.8484	26.9307	24.3153	29.644	29.6585	29.4685
P26038	P26038	Moesin	MSN	-	-	-	YES	3.55461	1.68604e-08	28.6166	28.1496	27.2813	31.5634	31.6421	31.5058
P16070-18;P16070-12;P16070-14;P16070-13;P16070-11;P16070-10;P16070-16;P16070-8;P16070-17;P16070-6;P16070-4;P16070-3;P16070-7;P16070-5;P16070;P16070-15;P16070-9;P16070-19	P16070-18;P16070-12;P16070-14;P16070-13;P16070-11;P16070-10;P16070-16;P16070-8;P16070-17;P16070-6;P16070-4;P16070-3;P16070-7;P16070-5;P16070;P16070-15;P16070-9	CD44 antigen	CD44	-	-	-	YES	3.39924	1.21943e-08	27.1986	28.084	27.3558	30.7195	30.8946	31.2221
P15374	P15374	Ubiquitin carboxyl-terminal hydrolase isozyme L3	UCHL3	-	-	-	-	3.39506	7.77666e-05	25.8954	25.3578	22.7818	28.0144	28.0698	28.136
P11047	P11047	Laminin subunit gamma-1	LAMC1	YES	Core matrisome	ECM Glycoproteins	YES	3.26995	1.64126e-07	25.8224	26.3768	25.0706	29.0096	29.3208	28.7493
P61769	P61769	Beta-2-microglobulin;Beta-2-microglobulin form pI 5.3	B2M	-	-	-	YES	3.22861	1.43414e-05	26.5355	26.6147	25.6717	28.7184	30.004	29.7853
Q92820	Q92820	Gamma-glutamyl hydrolase	GGH	-	-	-	YES	3.15455	5.49927e-09	27.6812	27.1619	27.4297	30.9915	30.4807	30.2643
Q15582	Q15582	Transforming growth factor-beta-induced protein ig-h3	TGFBI	YES	Core matrisome	ECM Glycoproteins	YES	3.14599	9.67416e-06	25.564	25.0889	23.6813	28.1455	27.9218	27.7049
Q04446	Q04446	1,4-alpha-glucan-branching enzyme	GBE1	-	-	-	YES	3.12423	1.08807e-06	24.7962	24.9728	24.2259	27.7199	28.3762	27.2715
P00338;P00338-3;P00338-5;P00338-2;P00338-4;Q6ZMR3	P00338;P00338-3;P00338-5;P00338-2;P00338-4	L-lactate dehydrogenase A chain	LDHA	-	-	-	YES	3.11298	0.000101264	29.5721	28.2748	26.6214	31.7337	31.3398	30.7337
Q14118	Q14118	Dystroglycan;Alpha-dystroglycan;Beta-dystroglycan	DAG1	-	-	-	YES	3.10143	9.39218e-09	27.4799	27.501	27.8908	30.5471	30.5407	31.0882
P07942	P07942	Laminin subunit beta-1	LAMB1	YES	Core matrisome	ECM Glycoproteins	YES	3.04829	3.30793e-06	25.2082	23.5105	24.1398	27.2266	27.2759	27.5009
P27708	P27708	CAD protein;Glutamine-dependent carbamoyl-phosphate synthase;Aspartate carbamoyltransferase;Dihydroorotase	CAD	-	-	-	YES	3.00113	2.54734e-05	24.5385	23.9852	24.4047	27.6178	27.5459	26.7681
P56537;P56537-2	P56537;P56537-2	Eukaryotic translation initiation factor 6	EIF6	-	-	-	YES	2.90949	1.13344e-07	26.9133	26.9454	26.5979	29.6378	29.7052	29.842
Q8NBJ4-2;Q8NBJ4	Q8NBJ4-2;Q8NBJ4	Golgi membrane protein 1	GOLM1	-	-	-	-	2.90377	1.83981e-06	25.8916	24.8396	24.7033	28.0491	28.2239	27.8728
Q01130-2;Q01130;Q9BRL6-2;Q9BRL6	Q01130-2;Q01130	Serine/arginine-rich splicing factor 2	SRSF2	-	-	-	-	2.86268	0.0156281	25.7094	26.7706	24.5587	28.5914	28.5761	28.4592
P50579-3;P50579-2;P50579	P50579-3;P50579-2;P50579	Methionine aminopeptidase 2	METAP2	-	-	-	-	2.81491	1.19041e-05	23.5937	23.816	23.8871	25.8711	26.7747	27.0957
Q14697;Q14697-2	Q14697;Q14697-2	Neutral alpha-glucosidase AB	GANAB	-	-	-	YES	2.80868	0.00785656	26.9315	27.9066	23.0323	29.0047	29.0943	28.1975
P02794	P02794	Ferritin heavy chain;Ferritin heavy chain, N-terminally processed	FTH1	-	-	-	YES	2.70436	8.0293e-05	27.733	26.484	25.7257	28.8089	29.3468	29.9002
O00303	O00303	Eukaryotic translation initiation factor 3 subunit F	EIF3F	-	-	-	-	2.6209	1.48248e-05	25.273	24.698	24.275	27.6613	27.4689	26.9785
P06865;P06865-2	P06865	Beta-hexosaminidase subunit alpha	HEXA	-	-	-	YES	2.61689	4.65793e-05	24.6856	24.912	26.224	28.1503	27.9563	27.5657
P00491	P00491	Purine nucleoside phosphorylase	PNP	-	-	-	YES	2.60785	0.00656097	26.1997	27.1982	22.8166	28.4098	28.1571	27.4711
Q15121;Q15121-2	Q15121;Q15121-2	Astrocytic phosphoprotein PEA-15	PEA15	-	-	-	-	2.5887	0.000532652	25.7554	26.146	23.1991	27.7667	27.6084	27.4914
P98160	P98160	Basement membrane-specific heparan sulfate proteoglycan core protein;Endorepellin;LG3 peptide	HSPG2	YES	Core matrisome	Proteoglycans	YES	2.5585	8.38648e-07	27.0334	28.1216	27.5779	30.2848	30.3237	29.7999
Q9Y262-2;Q9Y262	Q9Y262-2;Q9Y262	Eukaryotic translation initiation factor 3 subunit L	EIF3L	-	-	-	-	2.49979	4.38419e-06	24.8925	24.7301	23.8922	27.3314	27.2968	26.386
P35908	P35908	Keratin, type II cytoskeletal 2 epidermal	KRT2	-	-	-	YES	2.47579	0.0141397	28.1538	28.7842	30.2512	32.1399	33.0812	29.3954
Q14152;Q14152-2	Q14152;Q14152-2	Eukaryotic translation initiation factor 3 subunit A	EIF3A	-	-	-	-	2.43508	3.33325e-05	26.2291	26.5252	24.5989	28.3495	28.465	27.8439
P08603;P08603-2;Q03591	P08603;P08603-2	Complement factor H	CFH	-	-	-	YES	2.43421	0.000122966	25.1978	26.3865	24.2712	27.5218	27.6375	27.999
O00410;O00410-3;O00410-2;O60518	O00410;O00410-3;O00410-2	Importin-5	IPO5	-	-	-	-	2.41747	0.000157017	27.3558	26.465	26.3231	29.9258	29.0428	28.4278
Q99829	Q99829	Copine-1	CPNE1	-	-	-	YES	2.36422	3.82157e-06	23.6142	24.044	22.938	26.1522	25.9418	25.595
Q92520	Q92520	Protein FAM3C	FAM3C	-	-	-	YES	2.35941	2.68921e-06	25.0751	25.3825	24.3792	27.7108	27.4708	26.7335
P32004-3;P32004-2;P32004	P32004-3;P32004-2;P32004	Neural cell adhesion molecule L1	L1CAM	-	-	-	-	2.35455	6.0245e-06	25.0536	25.3066	24.0638	26.8721	27.2647	27.3509
P07686	P07686	Beta-hexosaminidase subunit beta;Beta-hexosaminidase subunit beta chain B;Beta-hexosaminidase subunit beta chain A	HEXB	-	-	-	YES	2.33817	2.2544e-06	27.4328	27.5441	26.553	29.6841	29.5472	29.313
Q9Y3B8-3;Q9Y3B8-2	Q9Y3B8-3;Q9Y3B8-2	Oligoribonuclease, mitochondrial	REXO2	-	-	-	-	2.25001	7.71105e-06	24.9603	24.7981	24.8824	26.9835	27.5846	26.8227
O14786-3;O14786-2;O14786	O14786-3;O14786-2;O14786	Neuropilin-1	NRP1	-	-	-	-	2.24832	7.03289e-08	26.3268	26.4845	26.6214	28.8249	28.6197	28.7331
Q15904	Q15904	V-type proton ATPase subunit S1	ATP6AP1	-	-	-	YES	2.08142	0.00104102	24.2706	25.6699	26.3621	27.2471	27.6526	27.6471
Q13308-5;Q13308-4;Q13308;Q13308-6;Q13308-2;Q13308-3	Q13308-5;Q13308-4;Q13308;Q13308-6;Q13308-2;Q13308-3	Inactive tyrosine-protein kinase 7	PTK7	-	-	-	-	2.07229	1.40955e-05	25.55	25.6603	26.0924	27.7874	27.7117	28.0206
P35237	P35237	Serpin B6	SERPINB6	YES	Matrisome-associated	ECM Regulators	YES	2.00268	0.00216841	25.9962	25.183	23.2877	26.9795	26.7376	26.7579
Q96RS6;Q96RS6-2;Q96RS6-3	Q96RS6;Q96RS6-2;Q96RS6-3	NudC domain-containing protein 1	NUDCD1	-	-	-	-	1.97932	0.00513946	26.4475	26.09	23.3557	27.5565	27.2076	27.067
P07996;P07996-2	P07996;P07996-2	Thrombospondin-1	THBS1	YES	Core matrisome	ECM Glycoproteins	YES	1.96937	3.87564e-07	32.4151	32.1164	32.084	34.2489	34.1773	34.0974
P60842;P60842-2	P60842;P60842-2	Eukaryotic initiation factor 4A-I	EIF4A1	-	-	-	YES	1.95872	9.76063e-05	29.1582	28.6782	28.5787	31.1699	30.793	30.3285
Q9NVA2;Q9NVA2-2;Q14141-2;Q14141-4;Q14141;Q14141-3;Q9P0V9-3;Q9P0V9;Q9P0V9-2	Q9NVA2;Q9NVA2-2	Septin-11	SEPT11	-	-	-	-	1.93398	7.86422e-05	25.4372	26.5011	26.4824	28.2215	27.8504	28.1507
P08758	P08758	Annexin A5	ANXA5	YES	Matrisome-associated	ECM-affiliated Proteins	YES	1.92367	0.00167095	24.7043	25.7378	27.1741	27.9049	27.9693	27.5129
P50991;P50991-2	P50991;P50991-2	T-complex protein 1 subunit delta	CCT4	-	-	-	YES	1.92174	0.000526526	25.6326	26.6768	25.4762	27.9826	27.956	27.6122
P78536-2;P78536	P78536-2;P78536	Disintegrin and metalloproteinase domain-containing protein 17	ADAM17	YES	Matrisome-associated	ECM Regulators	-	1.87501	0.00168952	24.7661	24.8859	23.4792	25.991	25.9973	26.768
Q13200;Q13200-3;Q13200-2	Q13200;Q13200-3;Q13200-2	26S proteasome non-ATPase regulatory subunit 2	PSMD2	-	-	-	YES	1.87343	7.8583e-05	26.1049	26.9726	25.5687	28.4569	27.982	27.8276
Q99613;Q99613-2;B5ME19	Q99613;Q99613-2;B5ME19	Eukaryotic translation initiation factor 3 subunit C;Eukaryotic translation initiation factor 3 subunit C-like protein	EIF3C;EIF3CL	-	-	-	-	1.86872	0.00013128	25.8775	26.1539	24.6464	27.1753	27.635	27.4737
P54727;P54727-2	P54727;P54727-2	UV excision repair protein RAD23 homolog B	RAD23B	-	-	-	-	1.85119	0.0835909	26.0769	26.9816	23.4929	27.7366	27.329	27.0394
P15291-2;P15291	P15291-2;P15291	Beta-1,4-galactosyltransferase 1;Lactose synthase A protein;N-acetyllactosamine synthase;Beta-N-acetylglucosaminylglycopeptide beta-1,4-galactosyltransferase;Beta-N-acetylglucosaminyl-glycolipid beta-1,4-galactosyltransferase;Processed beta-1,4-galactosyltransferase 1	B4GALT1	-	-	-	YES	1.84184	0.00972103	25.7831	25.8979	22.7714	26.9774	26.4827	26.5177
P35579;P35579-2;P35749-4;P35749-3;P35749;P35749-2;REV__Q08AF3;REV__Q9UKV3-5;REV__Q9UKV3	P35579;P35579-2	Myosin-9	MYH9	-	-	-	YES	1.83715	0.000611017	29.1102	29.1172	27.1309	30.3194	30.3919	30.1585
P78417;P78417-2;P78417-3	P78417;P78417-2;P78417-3	Glutathione S-transferase omega-1	GSTO1	-	-	-	YES	1.79284	0.00283134	25.9694	25.3216	23.561	26.8158	27.1716	26.2431
P55209-2;P55209;P55209-3	P55209-2;P55209;P55209-3	Nucleosome assembly protein 1-like 1	NAP1L1	-	-	-	-	1.78167	6.76739e-05	28.9706	28.8857	27.599	30.3178	30.1797	30.3029
P55036;P55036-2	P55036	26S proteasome non-ATPase regulatory subunit 4	PSMD4	-	-	-	-	1.77176	0.00117276	24.0667	26.0048	25.3269	26.6835	27.0443	26.9859
P43490	P43490	Nicotinamide phosphoribosyltransferase	NAMPT	-	-	-	YES	1.76716	1.94595e-05	26.2941	25.8773	25.1063	27.6134	27.3871	27.5786
P13010	P13010	X-ray repair cross-complementing protein 5	XRCC5	-	-	-	-	1.76031	0.00140683	27.4449	26.7116	26.0812	28.7676	28.4371	28.314
P11216;P11217-2;P11217	P11216	Glycogen phosphorylase, brain form	PYGB	-	-	-	YES	1.7527	0.00537233	26.3334	25.2366	23.8119	27.4004	27.0105	26.229
P30520	P30520	Adenylosuccinate synthetase isozyme 2	ADSS	-	-	-	YES	1.72453	0.0119775	25.4192	25.3257	23.5683	26.8976	26.5672	26.0221
P62333	P62333	26S protease regulatory subunit 10B	PSMC6	-	-	-	YES	1.71887	0.0149814	26.4246	25.9419	23.1082	27.0654	26.9575	26.6085
Q13740-2;Q13740;Q13740-3;Q13740-4	Q13740-2;Q13740	CD166 antigen	ALCAM	-	-	-	YES	1.71636	2.92272e-05	27.8571	26.8785	27.9896	29.3826	29.1625	29.3291
P02786	P02786	Transferrin receptor protein 1;Transferrin receptor protein 1, serum form	TFRC	-	-	-	YES	1.70199	0.0557162	26.1338	25.883	23.8827	27.45	26.8913	26.6642
O43852;O43852-3;O43852-6;O43852-2;O43852-4;O43852-5;O43852-15;O43852-10;O43852-9;O43852-13;O43852-14;O43852-11;O43852-8;O43852-12;O43852-7	O43852;O43852-3;O43852-6;O43852-2;O43852-4;O43852-5;O43852-15;O43852-10	Calumenin	CALU	-	-	-	-	1.68485	5.57414e-05	27.9924	28.1021	26.9951	29.3807	29.1337	29.6297
P15924;P15924-3;P15924-2	P15924;P15924-3;P15924-2	Desmoplakin	DSP	-	-	-	YES	1.67295	0.238005	26.0313	25.5475	23.2557	25.5987	30.1636	24.091
P16035	P16035	Metalloproteinase inhibitor 2	TIMP2	YES	Matrisome-associated	ECM Regulators	-	1.66203	0.00266307	27.7353	28.5097	28.1827	29.6702	30.042	29.7015
Q14444-2;Q14444	Q14444-2;Q14444	Caprin-1	CAPRIN1	-	-	-	-	1.65287	0.00357009	26.3182	23.8808	24.8783	26.5123	26.7898	26.7339
Q8WZA9	Q8WZA9	Immunity-related GTPase family Q protein	IRGQ	-	-	-	-	1.648	0.000654444	25.6444	26.4521	24.5852	26.7739	27.673	27.1788
Q16881-5;Q16881-2;Q16881-4;Q16881-3;Q16881-6;Q16881;Q16881-7	Q16881-5;Q16881-2;Q16881-4;Q16881-3;Q16881-6;Q16881;Q16881-7	Thioredoxin reductase 1, cytoplasmic	TXNRD1	-	-	-	YES	1.64288	1.08775e-05	27.4734	27.0619	26.8983	28.9324	28.828	28.6019
Q96G03;Q96G03-2	Q96G03	Phosphoglucomutase-2	PGM2	-	-	-	YES	1.62479	5.9128e-05	26.565	26.1596	25.7499	27.8551	28.1023	27.3915
O95336	O95336	6-phosphogluconolactonase	PGLS	-	-	-	YES	1.60623	0.024007	26.7732	26.4915	23.5897	27.5139	27.488	26.6712
Q9Y4L1;Q9Y4L1-2	Q9Y4L1;Q9Y4L1-2	Hypoxia up-regulated protein 1	HYOU1	-	-	-	YES	1.60456	0.00793656	26.5862	25.4916	23.7246	27.0802	26.736	26.7998
P29692;P29692-2;P29692-4	P29692;P29692-2;P29692-4	Elongation factor 1-delta	EEF1D	-	-	-	-	1.585	0.00060582	28.8033	29.7641	27.9251	30.321	30.3569	30.5696
O43493-4;O43493-2;O43493-5;O43493-3;O43493;O43493-6	O43493-4;O43493-2;O43493-5;O43493-3;O43493	Trans-Golgi network integral membrane protein 2	TGOLN2	-	-	-	-	1.55163	0.00470512	24.3052	24.3515	25.0051	25.3658	26.7179	26.2329
P26583	P26583	High mobility group protein B2	HMGB2	-	-	-	-	1.55119	0.00632577	26.1849	24.0377	25.2029	26.8517	26.5842	26.6432
Q07955;Q07955-3;Q07955-2	Q07955;Q07955-3;Q07955-2	Serine/arginine-rich splicing factor 1	SRSF1	-	-	-	-	1.55008	0.00548623	26.94	27.854	26.8215	28.4757	29.0118	28.7782
P28482-2;P28482	P28482-2;P28482	Mitogen-activated protein kinase 1	MAPK1	-	-	-	-	1.54781	0.00197022	24.6763	26.0229	24.1894	26.8022	26.8298	25.9
P07711	P07711	Cathepsin L1;Cathepsin L1 heavy chain;Cathepsin L1 light chain	CTSL	-	-	-	YES	1.52576	2.21223e-05	26.4791	26.9796	26.2594	28.0301	27.9323	28.3329
P26639;P26639-2;Q9BW92-2;Q9BW92	P26639;P26639-2	Threonine--tRNA ligase, cytoplasmic	TARS	-	-	-	YES	1.51713	3.01927e-05	26.893	27.2679	27.4898	28.894	28.8498	28.4583
Q01082;Q01082-3;Q01082-2;P11277-3;P11277;P11277-2;O15020-2;O15020	Q01082;Q01082-3;Q01082-2	Spectrin beta chain, non-erythrocytic 1	SPTBN1	-	-	-	YES	1.51339	3.26336e-05	28.4228	28.7753	27.7759	29.9622	29.8666	29.6853
P09382	P09382	Galectin-1	LGALS1	YES	Matrisome-associated	ECM-affiliated Proteins	YES	1.5101	0.000455509	27.3324	28.6105	27.6338	29.7473	29.4304	28.9293
Q16658	Q16658	Fascin	FSCN1	-	-	-	YES	1.50496	0.00780927	25.1714	25.4215	25.2862	26.3902	26.9786	27.0252
Q02818	Q02818	Nucleobindin-1	NUCB1	-	-	-	YES	1.47681	3.32291e-05	28.5004	28.8124	28.7538	29.9664	30.0596	30.4711
Q9BVG4	Q9BVG4	Protein PBDC1	PBDC1	-	-	-	-	1.46586	0.0217311	27.5921	26.9928	24.4632	27.9985	27.6909	27.7564
Q9UL46	Q9UL46	Proteasome activator complex subunit 2	PSME2	-	-	-	YES	1.46174	0.110199	28.1159	28.2527	23.844	28.4258	28.2726	27.8994
P27797	P27797	Calreticulin	CALR	-	-	-	YES	1.44932	1.05545e-05	28.9724	28.7901	28.813	30.1419	30.1744	30.6072
P12081-4;P12081;P12081-3;P12081-2	P12081-4;P12081;P12081-3;P12081-2	Histidine--tRNA ligase, cytoplasmic	HARS	-	-	-	-	1.4169	0.0404115	27.3497	26.9473	23.9171	27.7607	27.4109	27.2933
Q92734-2;Q92734;Q92734-4;Q92734-3	Q92734-2;Q92734;Q92734-4;Q92734-3	Protein TFG	TFG	-	-	-	-	1.41287	0.00913752	24.669	25.0758	23.978	26.689	25.9403	25.3321
O43681	O43681	ATPase ASNA1	ASNA1	-	-	-	YES	1.40952	0.00651788	24.9159	25.2551	23.3285	26.2628	25.9552	25.5101
P63208;P63208-2	P63208;P63208-2	S-phase kinase-associated protein 1	SKP1	-	-	-	-	1.39658	0.0843805	28.0286	26.8195	23.6786	27.626	27.3444	27.746
Q14847;Q14847-2;Q14847-3	Q14847;Q14847-2;Q14847-3	LIM and SH3 domain protein 1	LASP1	-	-	-	-	1.37403	0.000192128	27.1733	27.8486	27.1101	28.8234	28.946	28.4847
P61313;P61313-2	P61313;P61313-2	60S ribosomal protein L15	RPL15	-	-	-	-	1.37309	0.0256935	26.0487	23.4366	25.8212	26.8673	26.0426	26.5159
P53396-2;P53396;P53396-3	P53396-2;P53396;P53396-3	ATP-citrate synthase	ACLY	-	-	-	YES	1.36814	0.0697816	27.2014	27.2057	23.6505	27.5592	27.4758	27.1271
P08195-3;P08195;P08195-4	P08195-3;P08195;P08195-4	4F2 cell-surface antigen heavy chain	SLC3A2	-	-	-	YES	1.35639	0.0739999	25.7895	27.3453	25.2824	27.5359	27.607	27.3435
Q96CT7	Q96CT7	Coiled-coil domain-containing protein 124	CCDC124	-	-	-	-	1.3538	0.000492964	25.0697	25.5826	24.306	26.227	26.5024	26.2904
P20933	P20933	N(4)-(beta-N-acetylglucosaminyl)-L-asparaginase;Glycosylasparaginase alpha chain;Glycosylasparaginase beta chain	AGA	-	-	-	-	1.35098	0.000577349	25.5848	26.6674	26.0644	27.4063	27.3993	27.5638
P52823;P52823-2	P52823;P52823-2	Stanniocalcin-1	STC1	-	-	-	-	1.32942	0.0364331	27.1231	27.7017	27.0455	27.6684	28.8404	29.3498
O95757	O95757	Heat shock 70 kDa protein 4L	HSPA4L	-	-	-	-	1.32432	0.00296831	25.1371	24.1004	23.2649	25.6565	25.6712	25.1477
Q8NBS9;Q8NBS9-2	Q8NBS9;Q8NBS9-2	Thioredoxin domain-containing protein 5	TXNDC5	-	-	-	YES	1.32204	2.64861e-05	27.4193	27.9021	28.0847	29.2376	28.9833	29.1513
P17987	P17987	T-complex protein 1 subunit alpha	TCP1	-	-	-	YES	1.27956	7.5263e-05	27.8777	27.6046	27.3479	28.8468	28.904	28.918
P26641;P26641-2	P26641;P26641-2	Elongation factor 1-gamma	EEF1G	-	-	-	YES	1.2709	0.077532	29.4219	28.9904	26.7761	30.1901	29.8465	28.9645
P61160;P61160-2	P61160;P61160-2	Actin-related protein 2	ACTR2	-	-	-	YES	1.25695	0.00173781	25.8406	25.8543	25.7948	26.9618	27.1997	27.0991
Q8NBJ7;Q8NBJ7-2;Q8NBJ7-5;Q8NBJ7-3;Q8NBJ7-4	Q8NBJ7;Q8NBJ7-2;Q8NBJ7-5;Q8NBJ7-3	Sulfatase-modifying factor 2	SUMF2	-	-	-	-	1.24217	0.0503983	23.361	24.8156	25.1977	25.4065	25.5953	26.099
Q16531;Q16531-2	Q16531	DNA damage-binding protein 1	DDB1	-	-	-	YES	1.23942	0.0139407	27.0563	26.4959	27.3149	28.5408	28.3712	27.6733
P55884;P55884-2	P55884;P55884-2	Eukaryotic translation initiation factor 3 subunit B	EIF3B	-	-	-	YES	1.22287	0.000687808	27.1886	27.6935	26.6457	28.5159	28.4884	28.1921
P41250	P41250	Glycine--tRNA ligase	GARS	-	-	-	YES	1.21668	0.000780704	27.3952	26.6759	27.1395	28.6752	28.1727	28.0126
Q12805-5;Q12805-2;Q12805-4;Q12805-3;Q12805	Q12805-5;Q12805-2;Q12805-4;Q12805-3;Q12805	EGF-containing fibulin-like extracellular matrix protein 1	EFEMP1	YES	Core matrisome	ECM Glycoproteins	YES	1.21614	0.0342964	26.8051	26.5391	28.7254	28.6785	28.0889	28.9507
Q14019	Q14019	Coactosin-like protein	COTL1	-	-	-	YES	1.1965	0.0541183	26.1654	25.7439	23.3038	26.2608	26.319	26.2228
Q9UNM6;Q9UNM6-2	Q9UNM6;Q9UNM6-2	26S proteasome non-ATPase regulatory subunit 13	PSMD13	-	-	-	-	1.18598	0.0641239	26.6893	26.0575	23.4348	26.8823	26.4518	26.4054
Q16643;Q16643-3;Q16643-2	Q16643;Q16643-3;Q16643-2	Drebrin	DBN1	-	-	-	-	1.18588	0.0116693	27.0596	25.3863	26.2781	27.1985	27.5236	27.5595
P30040;P30040-2	P30040	Endoplasmic reticulum resident protein 29	ERP29	-	-	-	-	1.12281	0.000576711	26.8255	26.6799	26.6101	27.8298	27.7657	27.8884
O60888-3;O60888;O60888-2	O60888-3;O60888;O60888-2	Protein CutA	CUTA	-	-	-	YES	1.10981	0.000474481	29.065	28.4277	28.1937	29.6713	29.6518	29.6928
Q9BRK5;Q9BRK5-6;Q9BRK5-2;Q9BRK5-4;Q9BRK5-3;Q9BRK5-5	Q9BRK5;Q9BRK5-6;Q9BRK5-2	45 kDa calcium-binding protein	SDF4	-	-	-	YES	1.10815	0.0010743	27.3364	27.2781	27.2867	28.1269	28.2664	28.8322
P36578	P36578	60S ribosomal protein L4	RPL4	-	-	-	YES	1.09438	0.028148	23.8524	25.5258	26.0334	26.1556	25.9549	26.5842
P16870-2;P16870	P16870-2;P16870	Carboxypeptidase E	CPE	-	-	-	YES	1.09194	0.00540441	25.375	26.541	25.2319	26.5307	26.8227	27.0703
P31153;P31153-2;Q00266	P31153;P31153-2	S-adenosylmethionine synthase isoform type-2	MAT2A	-	-	-	-	1.08594	0.00014288	27.3137	26.9296	26.8673	27.9785	28.2339	28.1561
O15067	O15067	Phosphoribosylformylglycinamidine synthase	PFAS	-	-	-	YES	1.08445	0.183599	25.8876	26.6746	24.6043	26.8499	26.8902	26.6798
Q99733;Q99733-2	Q99733;Q99733-2	Nucleosome assembly protein 1-like 4	NAP1L4	-	-	-	-	1.07378	0.141001	27.2711	26.7412	24.5937	27.4121	27.2657	27.1496
P00505-2;P00505	P00505-2;P00505	Aspartate aminotransferase, mitochondrial	GOT2	-	-	-	YES	1.07206	0.0303682	26.9556	26.13	24.7559	27.2415	26.9847	26.8315
P30048-2;P30048	P30048-2;P30048	Thioredoxin-dependent peroxide reductase, mitochondrial	PRDX3	-	-	-	-	1.06498	0.00872359	27.9203	26.9497	26.7229	28.3701	28.1543	28.2633
P52888;P52888-2	P52888;P52888-2	Thimet oligopeptidase	THOP1	-	-	-	-	1.05665	0.00206921	24.8634	24.8917	24.2557	26.1535	25.4791	25.5482
P28072	P28072	Proteasome subunit beta type-6	PSMB6	-	-	-	YES	1.05629	0.0204619	27.7563	28.1079	27.1779	28.8303	28.6541	28.7265
Q13247-3;Q13247;Q13247-2;Q08170	Q13247-3;Q13247	Serine/arginine-rich splicing factor 6	SRSF6	-	-	-	-	1.05351	0.0023582	27.2705	27.6141	26.9519	27.974	28.5778	28.4454
Q9UNZ2;Q9UNZ2-5;Q9UNZ2-4;Q9UNZ2-6	Q9UNZ2;Q9UNZ2-5;Q9UNZ2-4;Q9UNZ2-6	NSFL1 cofactor p47	NSFL1C	-	-	-	-	1.04712	0.0280492	24.096	25.7085	26.1408	26.1291	26.3868	26.5708
Q9NX46	Q9NX46	Poly(ADP-ribose) glycohydrolase ARH3	ADPRHL2	-	-	-	-	0.998763	0.0092643	25.745	25.3152	24.246	25.9271	26.1031	26.2722
O15212	O15212	Prefoldin subunit 6	PFDN6	-	-	-	-	0.976663	0.0116463	24.5379	26.0484	25.2427	26.3911	26.257	26.1109
P08865	P08865	40S ribosomal protein SA	RPSA	-	-	-	YES	0.973037	0.00967952	28.0902	28.3192	27.5871	29.1107	29.0505	28.7545
Q13765;E9PAV3-2;E9PAV3;Q9BZK3	Q13765;E9PAV3-2;E9PAV3	Nascent polypeptide-associated complex subunit alpha;Nascent polypeptide-associated complex subunit alpha, muscle-specific form	NACA	-	-	-	-	0.95903	0.00170209	27.3724	27.1525	27.3016	28.5057	28.0875	28.1104
Q8NC51-3;Q8NC51;Q8NC51-4;Q8NC51-2	Q8NC51-3;Q8NC51;Q8NC51-4;Q8NC51-2	Plasminogen activator inhibitor 1 RNA-binding protein	SERBP1	-	-	-	YES	0.95302	0.0171796	25.6874	26.3252	25.2666	26.1283	26.6928	27.3171
Q15149-7;Q15149-8;Q15149-9;Q15149-5;Q15149-4;Q15149-6;Q15149-3;Q15149-2;Q15149	Q15149-7;Q15149-8;Q15149-9;Q15149-5;Q15149-4;Q15149-6;Q15149-3;Q15149-2;Q15149	Plectin	PLEC	-	-	-	YES	0.94933	0.0198178	30.1675	30.5086	28.7543	30.7826	30.837	30.6587
O15230;O15230-2;Q16787-3;Q16787	O15230	Laminin subunit alpha-5	LAMA5	YES	Core matrisome	ECM Glycoproteins	YES	0.930377	0.00767995	27.3872	28.0653	27.9573	28.9116	28.9611	28.3283
O43491-4;O43491;O43491-2;O43491-3	O43491-4;O43491;O43491-2;O43491-3	Band 4.1-like protein 2	EPB41L2	-	-	-	YES	0.929563	0.0089581	24.4013	24.3059	23.211	24.7109	25.0822	24.9138
P19105;O14950;P24844;P24844-2	P19105;O14950	Myosin regulatory light chain 12A;Myosin regulatory light chain 12B	MYL12A;MYL12B	-	-	-	-	0.91483	0.00239294	27.2027	27.7674	27.3415	28.5605	28.279	28.2166
P48147	P48147	Prolyl endopeptidase	PREP	-	-	-	-	0.91145	0.150969	25.326	25.1583	23.7991	25.7844	26.0002	25.2332
O75822-3;O75822;O75822-2	O75822-3;O75822;O75822-2	Eukaryotic translation initiation factor 3 subunit J	EIF3J	-	-	-	-	0.906597	0.231595	26.3735	26.2749	23.7251	26.1714	26.5466	26.3752
P12956;P12956-2	P12956;P12956-2	X-ray repair cross-complementing protein 6	XRCC6	-	-	-	-	0.89664	0.043576	28.4276	27.9171	26.3014	28.5217	28.5402	28.2741
Q9Y696	Q9Y696	Chloride intracellular channel protein 4	CLIC4	-	-	-	YES	0.889473	0.0732286	26.5443	26.334	24.3735	26.5961	26.7225	26.6017
P49721	P49721	Proteasome subunit beta type-2	PSMB2	-	-	-	YES	0.871187	0.0425638	26.3899	25.8256	26.5785	27.5659	27.3027	26.5388
Q9NUQ9;Q9NUQ9-2;Q9H0Q0	Q9NUQ9;Q9NUQ9-2	Protein FAM49B	FAM49B	-	-	-	YES	0.86936	0.0616744	25.8409	25.4926	23.7943	26.2872	25.9473	25.5014
Q02878	Q02878	60S ribosomal protein L6	RPL6	-	-	-	-	0.862253	0.0952248	25.7676	25.6179	23.4514	25.5894	25.8735	25.9607
P27348	P27348	14-3-3 protein theta	YWHAQ	-	-	-	YES	0.85785	0.00376852	29.2407	28.8994	28.7502	29.7165	29.8384	29.909
Q9Y5B9	Q9Y5B9	FACT complex subunit SPT16	SUPT16H	-	-	-	-	0.849353	0.0101217	26.5479	26.3276	25.3843	27.1233	26.8986	26.7859
Q9Y678	Q9Y678	Coatomer subunit gamma-1	COPG1	-	-	-	-	0.848057	0.0378154	26.0414	25.2539	24.7466	26.4803	26.3312	25.7745
P08133;P08133-2	P08133;P08133-2	Annexin A6	ANXA6	YES	Matrisome-associated	ECM-affiliated Proteins	YES	0.838437	0.0397885	24.6986	24.4875	26.242	26.0427	26.2602	25.6405
Q00688	Q00688	Peptidyl-prolyl cis-trans isomerase FKBP3	FKBP3	-	-	-	-	0.81791	0.224694	25.3501	25.7997	25.1616	26.6501	26.226	25.8891
Q9ULV4;Q9ULV4-2;Q9ULV4-3;Q6QEF8-4;Q6QEF8-3;Q6QEF8-2;Q6QEF8-5;Q6QEF8	Q9ULV4;Q9ULV4-2;Q9ULV4-3	Coronin-1C	CORO1C	-	-	-	-	0.81731	0.0199899	28.0459	28.0565	27.8827	28.8544	28.9033	28.6794
Q07021	Q07021	Complement component 1 Q subcomponent-binding protein, mitochondrial	C1QBP	-	-	-	-	0.811343	0.192513	27.0905	27.0357	24.3076	27.2477	26.9111	26.709
Q9Y490;Q9Y4G6	Q9Y490	Talin-1	TLN1	-	-	-	YES	0.806597	0.00473766	27.8717	28.0302	27.4831	28.7511	28.6828	28.3709
P61289;P61289-3;P61289-2	P61289;P61289-3;P61289-2	Proteasome activator complex subunit 3	PSME3	-	-	-	-	0.80648	0.0064255	26.8027	25.9393	25.9377	27.2323	26.8745	26.9923
P46109	P46109	Crk-like protein	CRKL	-	-	-	-	0.799323	0.142579	25.2433	26.1046	23.8327	26.1186	25.7368	25.7233
P14625;Q58FF3	P14625	Endoplasmin	HSP90B1	-	-	-	YES	0.798297	0.00130447	29.9275	29.8193	29.7055	30.6059	30.4355	30.8059
P63244	P63244	Guanine nucleotide-binding protein subunit beta-2-like 1;Guanine nucleotide-binding protein subunit beta-2-like 1, N-terminally processed	GNB2L1	-	-	-	-	0.796303	0.0409332	27.8135	26.8575	27.0327	28.222	28.373	27.4975
Q9Y3F4;Q9Y3F4-2	Q9Y3F4;Q9Y3F4-2	Serine-threonine kinase receptor-associated protein	STRAP	-	-	-	-	0.794977	0.0906967	26.0103	25.8701	24.0605	26.3063	26.0075	26.012
P07437;A6NNZ2	P07437	Tubulin beta chain	TUBB	-	-	-	YES	0.78582	0.00444785	30.3398	30.2328	30.0159	31.1419	30.9655	30.8385
P17174;P17174-2	P17174;P17174-2	Aspartate aminotransferase, cytoplasmic	GOT1	-	-	-	YES	0.779833	0.00333106	28.1995	27.8204	27.4649	28.7187	28.6801	28.4255
Q15424-2;Q15424;Q15424-4;Q15424-3	Q15424-2;Q15424;Q15424-4;Q15424-3	Scaffold attachment factor B1	SAFB	-	-	-	-	0.77113	0.229666	25.5664	26.4041	23.0909	25.9087	25.726	25.7401
P27816-6;P27816;P27816-2;P27816-5;P27816-7;P27816-4	P27816-6;P27816;P27816-2;P27816-5	Microtubule-associated protein 4	MAP4	-	-	-	-	0.770197	0.0025134	26.9021	26.9434	26.6421	27.5766	27.6985	27.5231
P06280	P06280	Alpha-galactosidase A	GLA	-	-	-	YES	0.768787	0.0203209	26.1743	25.5824	25.4427	26.6538	26.8416	26.0104
P07355;P07355-2;A6NMY6	P07355;P07355-2;A6NMY6	Annexin A2;Putative annexin A2-like protein	ANXA2;ANXA2P2	-	-	-	-	0.768137	0.076578	28.4827	27.9134	27.8161	29.3308	29.1806	28.0053
Q5VTE0;P68104;P68104-2	Q5VTE0;P68104;P68104-2	Putative elongation factor 1-alpha-like 3;Elongation factor 1-alpha 1	EEF1A1P5;EEF1A1	-	-	-	-	0.748817	0.018453	31.0107	30.3013	30.278	31.6926	31.202	30.9418
P61254;Q9UNX3	P61254;Q9UNX3	60S ribosomal protein L26;60S ribosomal protein L26-like 1	RPL26;RPL26L1	-	-	-	-	0.748687	0.214513	23.9672	24.8216	23.0491	24.0972	24.6228	25.364
Q8WVQ1-3;Q8WVQ1;Q8WVQ1-2	Q8WVQ1-3;Q8WVQ1	Soluble calcium-activated nucleotidase 1	CANT1	-	-	-	YES	0.742293	0.00546629	26.0637	26.642	26.2749	27.233	26.991	26.9835
O75083;O75083-3	O75083;O75083-3	WD repeat-containing protein 1	WDR1	-	-	-	YES	0.73832	0.00636395	28.5783	28.3496	28.4213	29.3222	29.1964	29.0456
P41567;O60739	P41567;O60739	Eukaryotic translation initiation factor 1;Eukaryotic translation initiation factor 1b	EIF1;EIF1B	-	-	-	-	0.736967	0.166849	26.5493	26.5428	24.352	26.7796	26.5069	26.3685
P35998;P35998-2	P35998;P35998-2	26S protease regulatory subunit 7	PSMC2	-	-	-	-	0.717763	0.0947667	26.5463	26.5798	25.2503	27.1329	27.0579	26.3389
O43684-2;O43684	O43684-2;O43684	Mitotic checkpoint protein BUB3	BUB3	-	-	-	-	0.715837	0.27317	25.5588	25.6059	23.0085	25.3882	25.6394	25.2931
O95777	O95777	U6 snRNA-associated Sm-like protein LSm8	LSM8	-	-	-	-	0.712303	0.0160107	25.688	25.7614	25.0151	26.3405	26.1283	26.1327
P30153;P30154-4;P30154;P30154-2;P30154-5;P30154-3	P30153	Serine/threonine-protein phosphatase 2A 65 kDa regulatory subunit A alpha isoform	PPP2R1A	-	-	-	YES	0.695787	0.0282937	28.4801	28.292	27.7841	29.0138	28.8603	28.7695
O14979-3;O14979-2;O14979	O14979-3;O14979-2;O14979	Heterogeneous nuclear ribonucleoprotein D-like	HNRNPDL	-	-	-	-	0.691417	0.285202	26.9872	26.5575	23.7374	26.7056	26.4201	26.2307
P62906	P62906	60S ribosomal protein L10a	RPL10A	-	-	-	YES	0.685407	0.087521	26.6937	27.147	27.5584	28.1412	28.0636	27.2505
P80303-2;P80303	P80303-2;P80303	Nucleobindin-2;Nesfatin-1	NUCB2	-	-	-	YES	0.668743	0.0137806	26.5868	26.2042	26.9994	27.2695	27.0654	27.4618
P22102;P22102-2	P22102;P22102-2	Trifunctional purine biosynthetic protein adenosine-3;Phosphoribosylamine--glycine ligase;Phosphoribosylformylglycinamidine cyclo-ligase;Phosphoribosylglycinamide formyltransferase	GART	-	-	-	YES	0.66858	0.0284846	26.3824	26.3158	25.8397	26.7104	26.7914	27.0418
P12814;P12814-3;P12814-2;P12814-4;P35609-2;P35609	P12814;P12814-3;P12814-2;P12814-4	Alpha-actinin-1	ACTN1	-	-	-	YES	0.667357	0.0142099	30.409	29.7917	29.8259	30.8491	30.5131	30.6665
P20290-2;P20290	P20290-2;P20290	Transcription factor BTF3	BTF3	-	-	-	-	0.654583	0.293827	26.2797	23.491	25.6102	26.056	25.9348	25.354
P14314-2;P14314	P14314-2;P14314	Glucosidase 2 subunit beta	PRKCSH	-	-	-	-	0.63843	0.0284239	28.9288	29.1354	28.4967	29.4103	29.2184	29.8475
P35637-2;P35637	P35637-2;P35637	RNA-binding protein FUS	FUS	-	-	-	-	0.62975	0.0721702	25.1165	25.135	23.7984	25.1717	25.398	25.3695
P42167-3;P42167-2;P42167;P42166	P42167-3;P42167-2;P42167;P42166	Lamina-associated polypeptide 2, isoforms beta/gamma;Thymopoietin;Thymopentin;Lamina-associated polypeptide 2, isoform alpha;Thymopoietin;Thymopentin	TMPO	-	-	-	-	0.62764	0.222202	26.3139	26.0104	23.8492	25.8822	26.0928	26.0814
P11717	P11717	Cation-independent mannose-6-phosphate receptor	IGF2R	-	-	-	YES	0.627533	0.115937	26.0734	26.1251	27.5882	27.01	27.2632	27.3961
P55268	P55268	Laminin subunit beta-2	LAMB2	YES	Core matrisome	ECM Glycoproteins	YES	0.61636	0.120808	27.9682	29.6754	27.9634	29.1055	29.1432	29.2074
Q16555-2;Q16555;Q14195;Q14194;Q14195-2;Q14194-2	Q16555-2;Q16555	Dihydropyrimidinase-related protein 2	DPYSL2	-	-	-	YES	0.61486	0.0250677	27.5381	27.9576	27.1481	28.257	27.9494	28.282
Q15691	Q15691	Microtubule-associated protein RP/EB family member 1	MAPRE1	-	-	-	-	0.614307	0.103501	27.2774	26.8468	26.5579	27.7482	27.8999	26.877
Q9BT78;Q9BT78-2	Q9BT78;Q9BT78-2	COP9 signalosome complex subunit 4	COPS4	-	-	-	-	0.612743	0.223896	25.9788	25.0893	24.5028	25.6685	25.7586	25.9821
O43390-4;O43390;O43390-2;O43390-3	O43390-4;O43390;O43390-2;O43390-3	Heterogeneous nuclear ribonucleoprotein R	HNRNPR	-	-	-	-	0.611977	0.0113007	24.7117	24.7509	24.7996	25.2405	25.4992	25.3584
O14744-5;O14744;O14744-3;O14744-2;O14744-4	O14744-5;O14744;O14744-3;O14744-2;O14744-4	Protein arginine N-methyltransferase 5;Protein arginine N-methyltransferase 5, N-terminally processed	PRMT5	-	-	-	-	0.592477	0.268493	25.4426	25.5357	24.1485	25.8213	25.9104	25.1725
P50990;P50990-2;P50990-3	P50990;P50990-2;P50990-3	T-complex protein 1 subunit theta	CCT8	-	-	-	YES	0.591847	0.0577389	29.1634	28.5182	28.467	29.5375	29.4657	28.9209
Q9UNF0-2;Q9UNF0	Q9UNF0-2;Q9UNF0	Protein kinase C and casein kinase substrate in neurons protein 2	PACSIN2	-	-	-	YES	0.59077	0.102553	24.9882	24.0035	23.6811	24.8324	24.7261	24.8866
P30050;P30050-2	P30050;P30050-2	60S ribosomal protein L12	RPL12	-	-	-	YES	0.573007	0.338383	26.2447	25.9966	23.3962	26.4319	25.654	25.2706
Q01518;Q01518-2	Q01518;Q01518-2	Adenylyl cyclase-associated protein 1	CAP1	-	-	-	YES	0.57134	0.095784	28.9078	28.9193	27.647	28.9262	29.1831	29.0788
O94985-2	O94985-2	Calsyntenin-1;Soluble Alc-alpha;CTF1-alpha	CLSTN1	-	-	-	-	0.570493	0.0318088	31.3397	31.2455	31.6538	31.904	31.8806	32.1658
P61158;Q9P1U1-2;Q9P1U1;Q9P1U1-3;Q9C0K3	P61158	Actin-related protein 3	ACTR3	-	-	-	YES	0.567347	0.0212573	28.1998	28.0484	27.877	28.7794	28.5523	28.4956
Q14204	Q14204	Cytoplasmic dynein 1 heavy chain 1	DYNC1H1	-	-	-	YES	0.56709	0.092866	26.7839	27.1844	26.5735	27.5184	27.5998	27.1248
P62987;P62979;P0CG47;P0CG48	P62987;P62979;P0CG47;P0CG48	Ubiquitin-60S ribosomal protein L40;Ubiquitin;60S ribosomal protein L40;Ubiquitin-40S ribosomal protein S27a;Ubiquitin;40S ribosomal protein S27a;Polyubiquitin-B;Ubiquitin;Polyubiquitin-C;Ubiquitin	UBA52;RPS27A;UBB;UBC	-	-	-	-	0.566007	0.0951084	29.015	28.8825	28.1267	29.1483	29.4745	29.0994
P24534	P24534	Elongation factor 1-beta	EEF1B2	-	-	-	-	0.5629	0.164531	29.0023	28.3778	27.7292	29.3532	28.6121	28.8327
Q9P2E9-3;Q9P2E9-2;Q9P2E9;Q8N4C6-6;Q8N4C6-11;Q8N4C6-4;Q8N4C6-9;Q8N4C6-2;Q8N4C6;Q8N4C6-5;Q8N4C6-10;Q8N4C6-7	Q9P2E9-3;Q9P2E9-2;Q9P2E9	Ribosome-binding protein 1	RRBP1	-	-	-	-	0.555023	0.279366	26.1952	25.5303	23.44	25.4745	25.8327	25.5234
Q12907	Q12907	Vesicular integral-membrane protein VIP36	LMAN2	-	-	-	YES	0.554383	0.257264	24.6072	26.1032	25.2686	25.1497	25.9501	26.5424
Q09666;Q09666-2	Q09666	Neuroblast differentiation-associated protein AHNAK	AHNAK	-	-	-	YES	0.536703	0.412711	28.1377	28.0022	24.7729	27.3322	27.647	27.5438
P62195;P62195-2	P62195;P62195-2	26S protease regulatory subunit 8	PSMC5	-	-	-	YES	0.536083	0.139213	25.9792	25.9752	24.6698	26.3113	26.1186	25.8025
Q13162	Q13162	Peroxiredoxin-4	PRDX4	-	-	-	YES	0.535817	0.0767992	26.5466	26.7565	26.1314	27.1843	26.8815	26.9762
P84103-2;P84103	P84103-2;P84103	Serine/arginine-rich splicing factor 3	SRSF3	-	-	-	-	0.533813	0.398794	26.2597	28.007	26.7895	27.8915	27.8736	26.8926
Q8NEV1;P68400;P68400-2	Q8NEV1;P68400;P68400-2	Casein kinase II subunit alpha 3;Casein kinase II subunit alpha	CSNK2A3;CSNK2A1	-	-	-	-	0.532797	0.172642	24.2815	25.7997	24.6462	25.5746	25.753	24.9982
P28070	P28070	Proteasome subunit beta type-4	PSMB4	-	-	-	YES	0.529203	0.369225	27.5659	25.899	24.4898	26.3623	26.6996	26.4804
Q13838;Q13838-2	Q13838;Q13838-2	Spliceosome RNA helicase DDX39B	DDX39B	-	-	-	-	0.521327	0.0935006	28.1778	27.8175	27.2531	28.5129	28.4612	27.8382
Q02809;Q02809-2	Q02809;Q02809-2	Procollagen-lysine,2-oxoglutarate 5-dioxygenase 1	PLOD1	YES	Matrisome-associated	ECM Regulators	YES	0.51908	0.407094	25.4005	25.9234	23.9959	26.5463	26.2406	24.0901
Q99832-3;Q99832;Q99832-4;Q99832-2	Q99832-3;Q99832;Q99832-4;Q99832-2	T-complex protein 1 subunit eta	CCT7	-	-	-	YES	0.510963	0.154185	26.7992	26.9105	25.3603	26.8374	26.793	26.9725
P08238;Q58FF7;Q92538-3;Q92538-2;Q92538	P08238	Heat shock protein HSP 90-beta	HSP90AB1	-	-	-	YES	0.510673	0.0594862	33.3095	33.2132	32.4988	33.4519	33.4954	33.6062
P34932;P34932-2	P34932	Heat shock 70 kDa protein 4	HSPA4	-	-	-	YES	0.507657	0.0172692	28.9657	29.1162	29.0584	29.6233	29.454	29.5859
P18085	P18085	ADP-ribosylation factor 4	ARF4	-	-	-	YES	0.507313	0.393188	24.6255	25.1806	24.6338	25.5124	25.3406	25.1089
P04114;REV__Q8IXS0	P04114	Apolipoprotein B-100;Apolipoprotein B-48	APOB	-	-	-	YES	0.49394	0.442446	24.2672	26.3078	26.0333	26.2385	25.6436	26.208
O14974-5;O14974-4;O14974-3;O14974;O14974-2	O14974-5;O14974-4;O14974-3;O14974;O14974-2	Protein phosphatase 1 regulatory subunit 12A	PPP1R12A	-	-	-	-	0.49214	0.103488	24.8487	26.0755	25.5824	25.9585	26.1308	25.8936
Q8WXX5	Q8WXX5	DnaJ homolog subfamily C member 9	DNAJC9	-	-	-	-	0.49204	0.070383	26.2305	25.3771	25.2773	26.1901	26.1054	26.0654
Q92896;Q92896-3;Q92896-2	Q92896;Q92896-3;Q92896-2	Golgi apparatus protein 1	GLG1	-	-	-	YES	0.49057	0.175354	27.3732	26.1439	26.5462	27.426	27.2753	26.8336
O75312	O75312	Zinc finger protein ZPR1	ZPR1	-	-	-	-	0.48927	0.134979	25.0741	25.3989	24.7605	25.5978	25.7141	25.3895
P33316-2;P33316	P33316-2;P33316	Deoxyuridine 5-triphosphate nucleotidohydrolase, mitochondrial	DUT	-	-	-	YES	0.486137	0.131247	26.9899	26.3905	27.2914	26.8399	27.4516	27.8387
P78371;P78371-2	P78371;P78371-2	T-complex protein 1 subunit beta	CCT2	-	-	-	YES	0.485413	0.0983016	29.2855	28.7403	28.1048	29.4257	29.1217	29.0395
Q9GZL7	Q9GZL7	Ribosome biogenesis protein WDR12	WDR12	-	-	-	-	0.484307	0.353993	24.6429	24.4831	22.7242	23.2595	25.0861	24.9576
Q15393;Q15393-3;Q15393-2	Q15393	Splicing factor 3B subunit 3	SF3B3	-	-	-	-	0.482657	0.313976	27.2461	27.2122	26.6898	27.8611	27.7154	27.0194
P59998;P59998-2;P59998-3;P59998-4	P59998;P59998-2;P59998-3	Actin-related protein 2/3 complex subunit 4	ARPC4	-	-	-	YES	0.462953	0.464208	26.284	26.0743	23.564	26.5082	25.6185	25.1843
P62241	P62241	40S ribosomal protein S8	RPS8	-	-	-	YES	0.453623	0.150293	26.4337	26.7098	27.6013	27.1756	27.2296	27.7005
P18206-2;P18206;P18206-3	P18206-2;P18206	Vinculin	VCL	-	-	-	YES	0.44762	0.0384276	29.2407	29.0585	29.077	29.7041	29.4558	29.5591
Q86SF2	Q86SF2	N-acetylgalactosaminyltransferase 7	GALNT7	-	-	-	YES	0.441563	0.496553	25.0764	25.5168	23.7023	26.347	23.6206	25.6527
P16152;P16152-2	P16152;P16152-2	Carbonyl reductase [NADPH] 1	CBR1	-	-	-	YES	0.434933	0.236385	25.7773	25.8009	24.2138	25.8816	25.8903	25.3249
P10586-2;P10586	P10586-2;P10586	Receptor-type tyrosine-protein phosphatase F	PTPRF	-	-	-	YES	0.433167	0.136379	27.8743	28.1397	27.264	28.0035	28.2939	28.28
P04179-4;P04179-2;P04179;P04179-3	P04179-4;P04179-2;P04179;P04179-3	Superoxide dismutase [Mn], mitochondrial	SOD2	-	-	-	YES	0.432183	0.226913	23.5295	23.5354	23.8352	24.0315	23.9363	24.2288
P43034;P43034-2	P43034	Platelet-activating factor acetylhydrolase IB subunit alpha	PAFAH1B1	-	-	-	YES	0.426797	0.0824797	26.1502	25.8229	25.7731	26.6089	26.2444	26.1733
P63104;P63104-2	P63104;P63104-2	14-3-3 protein zeta/delta	YWHAZ	-	-	-	YES	0.42571	0.109096	32.824	32.6872	32.4167	32.9719	33.0257	33.2075
P84098	P84098	60S ribosomal protein L19	RPL19	-	-	-	-	0.422983	0.41541	23.6183	25.8948	26.1319	25.5387	25.4926	25.8827
P53041	P53041	Serine/threonine-protein phosphatase 5	PPP5C	-	-	-	-	0.413893	0.409072	25.2465	25.5751	23.763	24.6724	25.8155	25.3385
Q00610-2;Q00610;P53675-2;P53675	Q00610-2;Q00610	Clathrin heavy chain 1	CLTC	-	-	-	YES	0.413447	0.217735	29.9411	29.3813	28.9357	30.2231	29.8797	29.3956
Q15029-2;Q15029-3;Q15029	Q15029-2;Q15029-3;Q15029	116 kDa U5 small nuclear ribonucleoprotein component	EFTUD2	-	-	-	-	0.412123	0.339033	25.8587	25.7379	23.8063	25.5264	25.6709	25.442
Q9HB07	Q9HB07	UPF0160 protein MYG1, mitochondrial	C12orf10	-	-	-	-	0.411627	0.421075	25.5892	26.235	23.5839	25.8559	25.4293	25.3577
P23396;P23396-2	P23396;P23396-2	40S ribosomal protein S3	RPS3	-	-	-	YES	0.408523	0.408679	26.4558	26.3618	24.8371	26.7838	26.6402	25.4563
P48637;P48637-2	P48637;P48637-2	Glutathione synthetase	GSS	-	-	-	YES	0.39888	0.145901	28.3616	27.6954	27.5135	28.4918	28.2633	28.0121
Q14974;Q14974-2	Q14974;Q14974-2	Importin subunit beta-1	KPNB1	-	-	-	YES	0.397093	0.136991	29.3653	29.4829	28.4959	29.6675	29.4902	29.3776
P32119;P32119-2	P32119	Peroxiredoxin-2	PRDX2	-	-	-	YES	0.391773	0.246414	29.3044	28.8502	27.9166	28.9059	29.3435	28.997
P09104-2;P09104	P09104-2;P09104	Gamma-enolase	ENO2	-	-	-	YES	0.38475	0.398714	25.6247	26.4582	24.2246	25.706	25.7293	26.0265
P46782	P46782	40S ribosomal protein S5;40S ribosomal protein S5, N-terminally processed	RPS5	-	-	-	YES	0.380763	0.235381	26.2656	26.4685	25.3563	26.489	26.6007	26.1429
P38606-2;P38606	P38606-2;P38606	V-type proton ATPase catalytic subunit A	ATP6V1A	-	-	-	YES	0.376803	0.36836	25.8221	26.0274	23.9497	25.7108	25.5131	25.7058
P01033	P01033	Metalloproteinase inhibitor 1	TIMP1	YES	Matrisome-associated	ECM Regulators	YES	0.37134	0.500257	28.7991	29.408	28.3548	29.575	29.1918	28.9092
Q9UBS4	Q9UBS4	DnaJ homolog subfamily B member 11	DNAJB11	-	-	-	-	0.3711	0.405808	26.1459	25.4556	24.1457	26.0995	25.2591	25.502
P08621-2;P08621;P08621-3;P08621-4	P08621-2;P08621;P08621-3	U1 small nuclear ribonucleoprotein 70 kDa	SNRNP70	-	-	-	-	0.364987	0.443894	27.0578	26.5472	24.8099	26.11	26.8145	26.5853
Q06124-2;Q06124;Q06124-3	Q06124-2;Q06124;Q06124-3	Tyrosine-protein phosphatase non-receptor type 11	PTPN11	-	-	-	-	0.360053	0.137152	26.5003	26.7423	26.0799	26.8209	26.6942	26.8875
P51114-3;P51114-2;P51114;P51116	P51114-3;P51114-2;P51114	Fragile X mental retardation syndrome-related protein 1	FXR1	-	-	-	-	0.356777	0.488192	25.2419	25.5518	23.3214	24.0738	25.4341	25.6776
Q15084-3;Q15084;Q15084-4;Q15084-5;Q15084-2	Q15084-3;Q15084;Q15084-4;Q15084-5;Q15084-2	Protein disulfide-isomerase A6	PDIA6	-	-	-	YES	0.354667	0.127935	28.5263	28.3644	27.812	28.6964	28.5791	28.4912
P62136;P62136-2;P62136-3	P62136;P62136-2;P62136-3	Serine/threonine-protein phosphatase PP1-alpha catalytic subunit	PPP1CA	-	-	-	YES	0.351083	0.564054	27.4235	26.9328	24.3323	26.9053	26.7718	26.0648
P61086-2;P61086;P61086-3	P61086-2;P61086	Ubiquitin-conjugating enzyme E2 K	UBE2K	-	-	-	-	0.348533	0.509364	26.1605	25.9194	24.7138	26.1226	26.0149	25.7019
P15311	P15311	Ezrin	EZR	-	-	-	YES	0.345897	0.21353	28.6801	28.6054	27.8719	28.5242	28.7648	28.906
P61978-2;P61978	P61978-2;P61978	Heterogeneous nuclear ribonucleoprotein K	HNRNPK	-	-	-	YES	0.34419	0.157478	29.7441	29.8545	30.0932	30.2539	30.206	30.2645
P13693;P13693-2;Q56UQ5	P13693;P13693-2	Translationally-controlled tumor protein	TPT1	-	-	-	YES	0.342383	0.275861	27.5853	27.7435	28.2687	27.9988	28.127	28.4989
P31431-2;P31431	P31431-2;P31431	Syndecan-4	SDC4	YES	Matrisome-associated	ECM-affiliated Proteins	YES	0.338017	0.305687	28.6765	28.5432	29.0577	28.5164	29.1779	29.5971
Q10567-4;Q10567-3;Q10567-2;Q10567	Q10567-4;Q10567-3;Q10567-2;Q10567	AP-1 complex subunit beta-1	AP1B1	-	-	-	-	0.33755	0.512414	25.9624	26.0502	24.0014	25.8461	25.7634	25.417
P48643;P48643-2	P48643;P48643-2	T-complex protein 1 subunit epsilon	CCT5	-	-	-	YES	0.334903	0.197194	29.075	28.9062	28.4887	29.3539	29.2917	28.829
P30101	P30101	Protein disulfide-isomerase A3	PDIA3	-	-	-	YES	0.33479	0.209571	29.7739	30.0321	29.1934	29.9571	29.8232	30.2235
P15586;P15586-2	P15586;P15586-2	N-acetylglucosamine-6-sulfatase	GNS	-	-	-	YES	0.332123	0.138641	27.2149	27.0989	26.9757	27.4425	27.5745	27.2689
P31946	P31946	14-3-3 protein beta/alpha;14-3-3 protein beta/alpha, N-terminally processed	YWHAB	-	-	-	YES	0.329467	0.218275	30.4836	30.616	30.122	30.5465	30.7275	30.9359
Q15369;Q15369-2	Q15369;Q15369-2	Transcription elongation factor B polypeptide 1	TCEB1	-	-	-	-	0.323733	0.473604	25.209	25.3181	23.3798	25.0084	24.8811	24.9886
P62753	P62753	40S ribosomal protein S6	RPS6	-	-	-	-	0.31702	0.246741	25.4906	25.8279	26.303	26.3132	26.0571	26.2022
P23588;P23588-2	P23588;P23588-2	Eukaryotic translation initiation factor 4B	EIF4B	-	-	-	-	0.310167	0.446079	27.3379	28.3414	27.2041	27.5201	28.1236	28.1703
P25788-2;P25788	P25788-2;P25788	Proteasome subunit alpha type-3	PSMA3	-	-	-	YES	0.309157	0.13742	27.8544	27.7965	27.7527	28.0346	28.1482	28.1482
P14866;P14866-2	P14866;P14866-2	Heterogeneous nuclear ribonucleoprotein L	HNRNPL	-	-	-	YES	0.306977	0.588287	27.5404	28.3442	25.8922	27.3152	27.7461	27.6365
P55795	P55795	Heterogeneous nuclear ribonucleoprotein H2	HNRNPH2	-	-	-	-	0.304547	0.667489	25.3607	25.423	22.9577	24.1988	25.4721	24.9842
Q99471;Q99471-2;Q99471-3	Q99471;Q99471-2;Q99471-3	Prefoldin subunit 5	PFDN5	-	-	-	-	0.30359	0.606033	26.8366	25.9349	24.0556	26.2632	25.8858	25.589
P48444;P48444-2	P48444;P48444-2	Coatomer subunit delta	ARCN1	-	-	-	-	0.298567	0.366125	26.3185	25.297	25.0458	26.152	25.9361	25.4689
Q7Z6Z7-2;Q7Z6Z7-3;Q7Z6Z7	Q7Z6Z7-2;Q7Z6Z7-3;Q7Z6Z7	E3 ubiquitin-protein ligase HUWE1	HUWE1	-	-	-	YES	0.29856	0.642255	26.5235	26.6392	23.322	25.9689	25.8881	25.5234
O14737;O14737-2	O14737;O14737-2	Programmed cell death protein 5	PDCD5	-	-	-	YES	0.29404	0.280979	26.7868	26.981	26.2176	27.003	27.1441	26.7204
Q96C90;P53671-3	Q96C90	Protein phosphatase 1 regulatory subunit 14B	PPP1R14B	-	-	-	-	0.282637	0.667914	27.2662	27.5651	24.1287	26.4138	26.5828	26.8115
Q9Y266	Q9Y266	Nuclear migration protein nudC	NUDC	-	-	-	-	0.280207	0.361123	26.4136	27.4829	26.4682	27.0529	27.0822	27.0702
P54136;P54136-2	P54136;P54136-2	Arginine--tRNA ligase, cytoplasmic	RARS	-	-	-	YES	0.277647	0.334897	26.2802	25.5664	25.4624	26.378	26.034	25.7298
Q92859-3;Q92859-2;Q92859-4;Q92859	Q92859-3;Q92859-2;Q92859-4;Q92859	Neogenin	NEO1	-	-	-	-	0.277233	0.463647	26.117	25.6627	25.4035	25.9964	25.6584	26.3601
P14324-2;P14324	P14324-2;P14324	Farnesyl pyrophosphate synthase	FDPS	-	-	-	-	0.274153	0.331979	27.1392	27.3549	27.6422	27.7312	27.8146	27.4129
P43243;P43243-2	P43243;P43243-2	Matrin-3	MATR3	-	-	-	-	0.264257	0.669739	27.0117	26.463	23.8298	25.9153	26.032	26.15
Q9Y383;Q96HJ9-2;Q9Y383-3;Q9Y383-2	Q9Y383;Q96HJ9-2;Q9Y383-3;Q9Y383-2	Putative RNA-binding protein Luc7-like 2	LUC7L2	-	-	-	-	0.253733	0.637141	25.1848	25.5844	24.3086	25.2029	25.269	25.3671
P09496-2;P09496-4;P09496-3;P09496;P09496-5	P09496-2;P09496-4;P09496-3;P09496;P09496-5	Clathrin light chain A	CLTA	-	-	-	-	0.25308	0.318674	27.4514	27.5355	26.9987	27.5952	27.5412	27.6085
P55072	P55072	Transitional endoplasmic reticulum ATPase	VCP	-	-	-	YES	0.25091	0.313227	30.4824	30.1634	29.8559	30.5257	30.4093	30.3194
O00299	O00299	Chloride intracellular channel protein 1	CLIC1	-	-	-	YES	0.25041	0.348383	29.8429	30.1494	29.7709	30.1976	30.2528	30.0639
O43396	O43396	Thioredoxin-like protein 1	TXNL1	-	-	-	-	0.250267	0.241238	26.262	26.2824	26.443	26.6417	26.4333	26.6632
P0DP25;P0DP24;P0DP23;P27482;P02585	P0DP25;P0DP24;P0DP23			-	-	-	-	0.247997	0.470357	31.9383	31.307	30.7033	31.6619	31.5057	31.5251
P12270;P12270-2	P12270;P12270-2	Nucleoprotein TPR	TPR	-	-	-	-	0.246587	0.558893	25.5406	26.0262	23.9328	25.5421	25.6082	25.089
P23526;P23526-2	P23526;P23526-2	Adenosylhomocysteinase	AHCY	-	-	-	YES	0.24606	0.314862	28.1784	27.6715	28.1269	28.3307	28.3631	28.0211
Q92692-2;Q92692	Q92692-2;Q92692	Nectin-2	PVRL2	-	-	-	-	0.23068	0.548306	25.9759	26.8793	27.7688	27.4444	27.2251	26.6466
Q9NZL9;Q9NZL9-3;Q9NZL9-4;Q9NZL9-2;Q9NZL9-5	Q9NZL9;Q9NZL9-3;Q9NZL9-4;Q9NZL9-2	Methionine adenosyltransferase 2 subunit beta	MAT2B	-	-	-	YES	0.225513	0.4121	26.736	27.1954	26.6688	27.1757	27.095	27.006
P28838-2;P28838	P28838-2;P28838	Cytosol aminopeptidase	LAP3	-	-	-	YES	0.22315	0.41498	26.8428	26.8547	27.3365	27.5818	27.2286	26.8931
Q03252	Q03252	Lamin-B2	LMNB2	-	-	-	-	0.222813	0.489993	26.515	27.2629	25.9078	26.5912	26.9651	26.7979
P22061;P22061-2	P22061;P22061-2	Protein-L-isoaspartate(D-aspartate) O-methyltransferase	PCMT1	-	-	-	YES	0.21954	0.416827	27.6444	28.1882	27.0123	27.9992	27.7115	27.7929
P05388;P05388-2;Q8NHW5	P05388;P05388-2;Q8NHW5	60S acidic ribosomal protein P0;60S acidic ribosomal protein P0-like	RPLP0;RPLP0P6	-	-	-	-	0.205943	0.521921	26.1591	26.5766	26.4656	27.2097	26.6094	26
Q9Y4Y9;Q9Y4Y9-2	Q9Y4Y9;Q9Y4Y9-2	U6 snRNA-associated Sm-like protein LSm5	LSM5	-	-	-	-	0.200467	0.755395	25.8431	26.8098	24.7397	25.9353	26.2122	25.8465
O15355	O15355	Protein phosphatase 1G	PPM1G	-	-	-	-	0.198503	0.350186	27.9458	27.5878	27.9494	28.1132	27.9586	28.0066
O14579;O14579-2;O14579-3	O14579;O14579-2;O14579-3	Coatomer subunit epsilon	COPE	-	-	-	-	0.196793	0.581347	26.6772	26.679	25.9474	26.9493	26.6165	26.3281
P13667	P13667	Protein disulfide-isomerase A4	PDIA4	-	-	-	-	0.19584	0.506806	28.3234	27.839	27.1197	27.8701	27.8614	28.1381
O94760;O94760-2	O94760	N(G),N(G)-dimethylarginine dimethylaminohydrolase 1	DDAH1	-	-	-	YES	0.18975	0.65891	27.4768	27.1384	26.6865	27.0286	27.1476	27.6946
P12268;P20839-2;P20839-4;P20839;P20839-3;P20839-7;P20839-5;P20839-6	P12268	Inosine-5-monophosphate dehydrogenase 2	IMPDH2	-	-	-	YES	0.175433	0.477173	26.7192	26.928	26.5193	27.0244	26.8634	26.805
Q99729-3;Q99729-2;Q99729-4;Q99729	Q99729-3;Q99729-2;Q99729-4;Q99729	Heterogeneous nuclear ribonucleoprotein A/B	HNRNPAB	-	-	-	-	0.17517	0.549686	28.3649	28.0376	27.3174	28.3233	27.8577	28.0644
Q04760-2;Q04760	Q04760-2;Q04760	Lactoylglutathione lyase	GLO1	-	-	-	YES	0.168507	0.450746	29.1702	28.8588	28.643	29.1183	29.04	29.0191
O00115-2;O00115	O00115-2;O00115	Deoxyribonuclease-2-alpha	DNASE2	-	-	-	YES	0.166157	0.587796	27.8119	28.2186	27.6987	28.0832	28.2934	27.8511
O95433;O95433-2	O95433;O95433-2	Activator of 90 kDa heat shock protein ATPase homolog 1	AHSA1	-	-	-	YES	0.165933	0.520147	26.3025	26.6615	26.3442	26.8779	26.4676	26.4605
P62495;P62495-2	P62495;P62495-2	Eukaryotic peptide chain release factor subunit 1	ETF1	-	-	-	-	0.16269	0.550076	25.6795	25.8665	24.8252	25.8451	25.5368	25.4774
Q16543	Q16543	Hsp90 co-chaperone Cdc37;Hsp90 co-chaperone Cdc37, N-terminally processed	CDC37	-	-	-	YES	0.157217	0.558704	28.6204	28.4994	28.1648	28.7878	28.4816	28.4868
Q15019;Q15019-3;Q15019-2	Q15019;Q15019-3;Q15019-2	Septin-2	SEPT2	-	-	-	YES	0.151657	0.652657	27.5178	27.6517	26.1849	27.3285	27.4264	27.0544
Q99873-3;Q99873-2;Q99873-4;Q99873;Q9NR22-2;Q9NR22	Q99873-3;Q99873-2;Q99873-4;Q99873	Protein arginine N-methyltransferase 1	PRMT1	-	-	-	-	0.150143	0.682248	27.3579	26.813	28.2696	27.9413	27.6072	27.3424
P09651-3;P09651-2;P09651;Q32P51	P09651-3;P09651-2;P09651;Q32P51	Heterogeneous nuclear ribonucleoprotein A1;Heterogeneous nuclear ribonucleoprotein A1, N-terminally processed;Heterogeneous nuclear ribonucleoprotein A1-like 2	HNRNPA1;HNRNPA1L2	-	-	-	-	0.14577	0.693945	29.1859	29.3628	27.8281	28.9569	29.0934	28.7638
Q14103-3;Q14103;Q14103-4;Q14103-2	Q14103-3;Q14103;Q14103-4;Q14103-2	Heterogeneous nuclear ribonucleoprotein D0	HNRNPD	-	-	-	-	0.144307	0.74617	29.3903	28.5015	28.5695	28.2311	29.1391	29.5241
P02545;P02545-6;P02545-3;P02545-5	P02545;P02545-6;P02545-3;P02545-5	Prelamin-A/C;Lamin-A/C	LMNA	-	-	-	-	0.13961	0.533345	31.3037	31.4155	30.9133	31.2085	31.3188	31.524
P30085;P30085-2	P30085;P30085-2	UMP-CMP kinase	CMPK1	-	-	-	YES	0.138113	0.81368	25.6632	25.7838	25.6511	25.6916	25.8278	25.9931
Q8WXF1;Q8WXF1-2	Q8WXF1;Q8WXF1-2	Paraspeckle component 1	PSPC1	-	-	-	-	0.135187	0.797618	26.3621	26.4814	24.737	26.0965	26.4111	25.4785
Q04323;Q04323-2	Q04323;Q04323-2	UBX domain-containing protein 1	UBXN1	-	-	-	-	0.13008	0.735173	26.0307	25.3923	25.4276	25.9208	26.0769	25.2432
Q12874	Q12874	Splicing factor 3A subunit 3	SF3A3	-	-	-	-	0.124027	0.803382	25.3375	27.3458	26.5591	26.6831	26.6259	26.3055
P05198	P05198	Eukaryotic translation initiation factor 2 subunit 1	EIF2S1	-	-	-	YES	0.12328	0.612221	27.3807	27.4374	26.8802	27.3085	27.3736	27.386
O75369-8	O75369-8	Filamin-B	FLNB	-	-	-	YES	0.115643	0.607811	30.4813	30.3079	29.8257	30.448	30.2613	30.2526
P05455	P05455	Lupus La protein	SSB	-	-	-	-	0.11499	0.756177	26.6595	25.9315	26.6004	26.6694	26.6482	26.2189
Q07954	Q07954	Prolow-density lipoprotein receptor-related protein 1;Low-density lipoprotein receptor-related protein 1 85 kDa subunit;Low-density lipoprotein receptor-related protein 1 515 kDa subunit;Low-density lipoprotein receptor-related protein 1 intracellular domain	LRP1	-	-	-	-	0.112863	0.776317	24.3375	24.795	25.2893	24.9382	24.1359	25.6863
Q9Y230;Q9Y230-2	Q9Y230;Q9Y230-2	RuvB-like 2	RUVBL2	-	-	-	YES	0.11238	0.665695	27.8964	27.7751	26.9574	27.6087	27.7263	27.6309
P25787	P25787	Proteasome subunit alpha type-2	PSMA2	-	-	-	YES	0.10962	0.737331	26.7735	26.1827	25.6947	26.6158	26.2375	26.1265
Q15046;Q15046-2	Q15046;Q15046-2	Lysine--tRNA ligase	KARS	-	-	-	-	0.109347	0.646197	26.6795	26.9408	26.1432	26.7461	26.5531	26.7923
P18669;P15259;Q8N0Y7	P18669;P15259	Phosphoglycerate mutase 1;Phosphoglycerate mutase 2	PGAM1;PGAM2	-	-	-	-	0.107153	0.666425	29.9535	30.7099	29.992	30.0305	30.4428	30.5035
P16949;P16949-2	P16949;P16949-2	Stathmin	STMN1	-	-	-	YES	0.10506	0.707872	28.2251	28.7452	28.0548	28.4919	28.5108	28.3375
P06454-2;P06454	P06454-2;P06454	Prothymosin alpha;Prothymosin alpha, N-terminally processed;Thymosin alpha-1	PTMA	-	-	-	-	0.101403	0.8786	30.327	31.4727	30.3421	29.1862	31.3333	31.9265
Q9BQT9;Q9BQT9-2	Q9BQT9;Q9BQT9-2	Calsyntenin-3	CLSTN3	-	-	-	-	0.101177	0.697955	25.5274	25.6199	26.0545	25.8978	25.8344	25.7731
Q9NZT1	Q9NZT1	Calmodulin-like protein 5	CALML5	-	-	-	-	0.0955	0.899649	27.2324	27.0425	29.3765	26.5593	29.0258	28.3529
O15231;O15231-3;O15231-6;O15231-5;O15231-4;O15231-7;O15231-8;O15231-2;O15231-9	O15231;O15231-3;O15231-6;O15231-5;O15231-4;O15231-7;O15231-8;O15231-2	Zinc finger protein 185	ZNF185	-	-	-	-	0.0947767	0.747342	26.404	26.7389	25.5457	26.038	26.3609	26.574
Q9NZZ3;Q9NZZ3-2	Q9NZZ3;Q9NZZ3-2	Charged multivesicular body protein 5	CHMP5	-	-	-	YES	0.0946167	0.669905	25.9257	25.7826	25.4273	25.9418	25.835	25.6426
P46777	P46777	60S ribosomal protein L5	RPL5	-	-	-	YES	0.08615	0.734989	26.3347	26.4975	27.0371	26.6084	26.6862	26.8332
P68363;P68363-2;A6NHL2-2;A6NHL2;Q9H853	P68363;P68363-2	Tubulin alpha-1B chain	TUBA1B	-	-	-	-	0.0832267	0.763708	32.026	31.552	32.2109	32.1943	31.9702	31.8741
Q13813-3;Q13813;Q13813-2	Q13813-3;Q13813;Q13813-2	Spectrin alpha chain, non-erythrocytic 1	SPTAN1	-	-	-	YES	0.0814267	0.681915	29.7707	30.0615	29.6215	29.953	29.8598	29.8852
P67809;Q9Y2T7	P67809	Nuclease-sensitive element-binding protein 1	YBX1	-	-	-	YES	0.07541	0.783776	28.1009	27.8275	28.2577	27.6659	28.3269	28.4196
P05387	P05387	60S acidic ribosomal protein P2	RPLP2	-	-	-	YES	0.07416	0.790318	29.9487	29.7665	28.9663	29.7173	29.4749	29.7117
P49189;P49189-2	P49189	4-trimethylaminobutyraldehyde dehydrogenase	ALDH9A1	-	-	-	YES	0.0703833	0.860104	26.1787	25.9037	26.0159	26.7892	26.6223	24.8981
P00492	P00492	Hypoxanthine-guanine phosphoribosyltransferase	HPRT1	-	-	-	YES	0.0675633	0.843105	27.999	26.8952	27.199	27.9432	27.3094	27.0432
Q06210-2;Q06210;O94808	Q06210-2;Q06210	Glutamine--fructose-6-phosphate aminotransferase [isomerizing] 1	GFPT1	-	-	-	YES	0.06688	0.913394	25.1089	25.0155	23.4132	24.8091	24.3953	24.5339
Q15637-4;Q15637-6;Q15637-7;Q15637-3;Q15637-2;Q15637;Q15637-5	Q15637-4;Q15637-6;Q15637-7;Q15637-3;Q15637-2;Q15637;Q15637-5	Splicing factor 1	SF1	-	-	-	-	0.06376	0.892701	25.6583	25.1947	24.6855	25.8425	25.2288	24.6587
P49368;P49368-2	P49368;P49368-2	T-complex protein 1 subunit gamma	CCT3	-	-	-	YES	0.0607533	0.829471	28.9676	28.6155	27.7474	28.7228	28.4055	28.3844
P07602;P07602-2;P07602-3	P07602;P07602-2;P07602-3	Prosaposin;Saposin-A;Saposin-B-Val;Saposin-B;Saposin-C;Saposin-D	PSAP	-	-	-	YES	0.04908	0.921159	29.1305	26.9222	28.0936	28.3102	28.1091	27.8742
P19338	P19338	Nucleolin	NCL	-	-	-	YES	0.0472267	0.820698	31.495	31.5471	31.1746	31.4848	31.396	31.4776
P10253	P10253	Lysosomal alpha-glucosidase;76 kDa lysosomal alpha-glucosidase;70 kDa lysosomal alpha-glucosidase	GAA	-	-	-	YES	0.0447267	0.935218	26.4346	27.1507	24.3243	26.2508	26.1334	25.6595
Q9H0D6-2;Q9H0D6	Q9H0D6-2;Q9H0D6	5-3 exoribonuclease 2	XRN2	-	-	-	-	0.0326067	0.955944	25.8232	26.2481	23.265	25.1348	25.3051	24.9942
P62310	P62310	U6 snRNA-associated Sm-like protein LSm3	LSM3	-	-	-	-	0.0295967	0.894654	27.3619	27.6606	27.4971	27.7724	27.4138	27.4222
P11940-2;P11940;Q9H361;Q13310-2;Q13310;Q13310-3;Q4VXU2;Q4VXU2-2;Q5JQF8;Q96DU9-2;Q96DU9	P11940-2;P11940;Q9H361	Polyadenylate-binding protein 1;Polyadenylate-binding protein 3	PABPC1;PABPC3	-	-	-	-	0.02523	0.943253	28.9466	28.8382	27.4717	28.643	28.4789	28.2103
Q06323;Q06323-3;Q06323-2	Q06323;Q06323-3;Q06323-2	Proteasome activator complex subunit 1	PSME1	-	-	-	YES	0.01576	0.969946	28.4288	28.1068	27.0285	28.1115	27.734	27.7659
P35443	P35443	Thrombospondin-4	THBS4	YES	Core matrisome	ECM Glycoproteins	YES	0.0152067	0.983017	24.7997	25.9009	26.3605	25.3035	25.1641	26.6391
P55060-3;P55060;P55060-4;P55060-2	P55060-3;P55060;P55060-4;P55060-2	Exportin-2	CSE1L	-	-	-	YES	0.00181333	0.994934	28.1491	27.4496	27.3	28.0082	27.5696	27.3263
P62750	P62750	60S ribosomal protein L23a	RPL23A	-	-	-	YES	-0.00046	0.999162	25.8433	25.8245	25.9515	25.7129	26.0789	25.8261
P52788;P52788-2	P52788;P52788-2	Spermine synthase	SMS	-	-	-	YES	-0.00285333	0.988381	26.2334	26.3827	26.4551	26.2663	26.3345	26.4618
Q08945	Q08945	FACT complex subunit SSRP1	SSRP1	-	-	-	-	-0.00582333	0.990447	25.6583	25.3565	23.829	25.6084	25.4425	23.7753
P38646	P38646	Stress-70 protein, mitochondrial	HSPA9	-	-	-	YES	-0.00826333	0.976943	29.5492	29.6722	28.8123	29.4829	29.5396	28.9866
P40925;P40925-3;P40925-2	P40925;P40925-3;P40925-2	Malate dehydrogenase, cytoplasmic	MDH1	-	-	-	YES	-0.0117833	0.970711	28.2315	28.0012	27.127	28.0776	27.9916	27.2552
P25789;P25789-2	P25789;P25789-2	Proteasome subunit alpha type-4	PSMA4	-	-	-	YES	-0.0121	0.974878	28.5617	28.0578	26.6583	27.9276	27.9394	27.3745
P21281;P15313	P21281	V-type proton ATPase subunit B, brain isoform	ATP6V1B2	-	-	-	YES	-0.0177667	0.939002	25.8446	26.2674	26.1003	26.3069	26.2746	25.5773
Q15008;Q15008-4;Q15008-3;Q15008-2	Q15008;Q15008-4;Q15008-3;Q15008-2	26S proteasome non-ATPase regulatory subunit 6	PSMD6	-	-	-	-	-0.01893	0.975736	25.9009	26.3883	23.9492	25.6941	25.0671	25.4204
Q9UNH7;Q9UNH7-2	Q9UNH7;Q9UNH7-2	Sorting nexin-6;Sorting nexin-6, N-terminally processed	SNX6	-	-	-	-	-0.0212367	0.951461	23.6445	23.5615	24.6797	23.9514	24.0863	23.7843
P20810-3;P20810-4;P20810-8;P20810-2;P20810;P20810-9;P20810-5;P20810-10;P20810-7;P20810-6	P20810-3;P20810-4;P20810-8;P20810-2;P20810;P20810-9;P20810-5;P20810-10;P20810-7;P20810-6	Calpastatin	CAST	-	-	-	-	-0.0216367	0.933314	27.0004	26.9446	26.249	26.7281	26.737	26.664
P30041	P30041	Peroxiredoxin-6	PRDX6	-	-	-	YES	-0.03002	0.944762	29.3028	28.4083	27.5843	28.8185	28.4778	27.9091
Q96D15	Q96D15	Reticulocalbin-3	RCN3	-	-	-	-	-0.0303533	0.912201	24.7458	24.8635	25.5775	24.9224	24.6342	25.5391
Q6EMK4	Q6EMK4	Vasorin	VASN	-	-	-	YES	-0.03258	0.953733	24.9403	26.299	23.5393	24.8628	24.8802	24.9379
O15160-2;O15160	O15160-2;O15160	DNA-directed RNA polymerases I and III subunit RPAC1	POLR1C	-	-	-	-	-0.03667	0.924873	25.9602	25.7363	24.0839	25.2391	25.2984	25.1328
O00231;O00231-2	O00231;O00231-2	26S proteasome non-ATPase regulatory subunit 11	PSMD11	-	-	-	-	-0.04342	0.8765	26.7272	26.5915	25.6975	26.2897	26.4716	26.1246
P31150	P31150	Rab GDP dissociation inhibitor alpha	GDI1	-	-	-	-	-0.0454233	0.854066	28.1586	27.711	27.7269	27.9205	27.734	27.8056
Q96TA1-2;Q96TA1	Q96TA1-2;Q96TA1	Niban-like protein 1	FAM129B	-	-	-	YES	-0.0473433	0.916499	25.1258	24.605	25.5799	25.5649	24.9801	24.6236
P62314	P62314	Small nuclear ribonucleoprotein Sm D1	SNRPD1	-	-	-	-	-0.0487567	0.950721	26.2338	26.6787	23.1001	24.9456	26.307	24.6137
P40227;P40227-2;Q92526;Q92526-2;Q92526-3	P40227;P40227-2	T-complex protein 1 subunit zeta	CCT6A	-	-	-	YES	-0.0667667	0.781561	28.8045	28.785	28.1745	28.5859	28.5389	28.4388
P35606-2;P35606	P35606-2;P35606	Coatomer subunit beta	COPB2	-	-	-	-	-0.0691333	0.767511	26.8175	26.5239	27.0105	26.6982	26.7029	26.7434
O00468-6;O00468-3;O00468-7;O00468-5;O00468-4;O00468;O00468-2	O00468-6;O00468-3;O00468-7;O00468-5;O00468-4;O00468;O00468-2	Agrin;Agrin N-terminal 110 kDa subunit;Agrin C-terminal 110 kDa subunit;Agrin C-terminal 90 kDa fragment;Agrin C-terminal 22 kDa fragment	AGRN	YES	Core matrisome	ECM Glycoproteins	YES	-0.0722467	0.778762	29.7243	30.5103	29.5337	29.983	29.8852	29.6833
Q9UNS2;Q9UNS2-2	Q9UNS2;Q9UNS2-2	COP9 signalosome complex subunit 3	COPS3	-	-	-	-	-0.0728	0.867749	25.9304	24.8657	23.8192	24.821	25.2396	24.3363
P26640;P26640-2	P26640	Valine--tRNA ligase	VARS	-	-	-	-	-0.0741533	0.78487	25.246	25.8638	25.5719	25.5836	25.5891	25.2865
Q13347	Q13347	Eukaryotic translation initiation factor 3 subunit I	EIF3I	-	-	-	YES	-0.0822067	0.757957	27.9134	27.912	27.5616	27.8795	27.5935	27.6673
P50454	P50454	Serpin H1	SERPINH1	YES	Matrisome-associated	ECM Regulators	-	-0.0868433	0.768145	28.2159	28.15	27.1953	27.9902	27.7257	27.5848
P81605;P81605-2	P81605;P81605-2	Dermcidin;Survival-promoting peptide;DCD-1	DCD	-	-	-	YES	-0.0887667	0.939475	27.2742	27.168	29.0747	25.2862	27.9398	30.0246
P10644;P10644-2	P10644;P10644-2	cAMP-dependent protein kinase type I-alpha regulatory subunit;cAMP-dependent protein kinase type I-alpha regulatory subunit, N-terminally processed	PRKAR1A	-	-	-	-	-0.0947	0.75191	26.0997	25.9594	25.4058	25.7285	26.1609	25.2913
P11021	P11021	78 kDa glucose-regulated protein	HSPA5	-	-	-	YES	-0.0972333	0.616984	30.7989	30.6399	30.6035	30.5849	30.5421	30.6235
P05023-3;P05023-4;P05023;P05023-2;P13637;P13637-2;P13637-3;P50993;Q13733;P20648	P05023-3;P05023-4;P05023;P05023-2	Sodium/potassium-transporting ATPase subunit alpha-1	ATP1A1	-	-	-	YES	-0.0979033	0.868898	27.0153	26.5608	23.83	25.8182	25.7971	25.497
P13489	P13489	Ribonuclease inhibitor	RNH1	-	-	-	YES	-0.101273	0.822743	29.3192	28.5338	27.1765	28.1457	28.2108	28.3693
O00487	O00487	26S proteasome non-ATPase regulatory subunit 14	PSMD14	-	-	-	-	-0.101993	0.844967	26.0287	24.9522	24.7479	26.0765	25.416	23.9304
O00584;O00584-2;Q07343-4;Q07343-2;Q07343-3;Q07343	O00584	Ribonuclease T2	RNASET2	-	-	-	YES	-0.11869	0.678656	28.0602	27.4476	27.3886	27.5635	27.4949	27.482
P62191;P62191-2	P62191;P62191-2	26S protease regulatory subunit 4	PSMC1	-	-	-	-	-0.12676	0.60704	25.7831	26.3503	25.6911	25.6235	26.0477	25.773
P54819-5;P54819-2;P54819;P54819-3;P54819-6;P54819-4	P54819-5;P54819-2;P54819;P54819-3;P54819-6	Adenylate kinase 2, mitochondrial;Adenylate kinase 2, mitochondrial, N-terminally processed	AK2	-	-	-	YES	-0.136737	0.630547	26.5695	26.4823	25.689	26.511	25.956	25.8635
Q12906;Q12906-7;Q12906-5;Q12906-4;Q12906-2;Q12906-6;Q12906-3;Q96SI9-2;Q96SI9	Q12906;Q12906-7;Q12906-5;Q12906-4;Q12906-2;Q12906-6;Q12906-3	Interleukin enhancer-binding factor 3	ILF3	-	-	-	-	-0.1391	0.638409	28.4001	27.9038	27.0273	27.7565	27.5227	27.6346
P38919	P38919	Eukaryotic initiation factor 4A-III;Eukaryotic initiation factor 4A-III, N-terminally processed	EIF4A3	-	-	-	-	-0.153807	0.818826	27.6277	27.2071	24.3588	26.3236	26.5359	25.8728
P00558;P00558-2;P07205	P00558;P00558-2	Phosphoglycerate kinase 1	PGK1	-	-	-	YES	-0.157523	0.565115	30.6774	30.5087	29.574	30.1298	29.9411	30.2166
P04406;P04406-2;O14556	P04406;P04406-2	Glyceraldehyde-3-phosphate dehydrogenase	GAPDH	-	-	-	YES	-0.16088	0.484706	30.4447	30.4892	30.4081	30.2939	30.693	29.8724
Q13283;Q13283-2	Q13283	Ras GTPase-activating protein-binding protein 1	G3BP1	-	-	-	-	-0.161073	0.472943	27.6694	27.7439	27.0841	27.5437	27.1147	27.3557
P09493-5	P09493-5	Tropomyosin alpha-1 chain	TPM1	-	-	-	-	-0.161377	0.764309	26.9542	27.6415	27.0747	26.6294	27.0616	27.4953
P60900;P60900-2;P60900-3	P60900;P60900-2	Proteasome subunit alpha type-6	PSMA6	-	-	-	YES	-0.16454	0.469377	28.8931	28.5364	28.4197	28.5116	28.4573	28.3866
P62280	P62280	40S ribosomal protein S11	RPS11	-	-	-	YES	-0.16725	0.463112	26.2006	26.0223	25.6329	25.8535	25.5582	25.9425
P10599;P10599-2	P10599;P10599-2	Thioredoxin	TXN	-	-	-	YES	-0.16829	0.610248	29.833	30.0593	29.0845	29.0623	29.7361	29.6735
Q15365;P57721-2;P57721-3;P57721-5;P57721-4;P57721	Q15365	Poly(rC)-binding protein 1	PCBP1	-	-	-	YES	-0.178233	0.584237	28.2915	28.1704	27.2819	27.9864	27.824	27.3986
Q13409-6;Q13409-3;Q13409-2;Q13409-7;Q13409-5;Q13409	Q13409-6;Q13409-3;Q13409-2;Q13409-7;Q13409-5;Q13409	Cytoplasmic dynein 1 intermediate chain 2	DYNC1I2	-	-	-	-	-0.190057	0.527596	26.9902	27.1379	26.3784	26.4448	26.4826	27.0089
P54578-2;P54578-3;P54578	P54578-2;P54578-3;P54578	Ubiquitin carboxyl-terminal hydrolase 14	USP14	-	-	-	YES	-0.193593	0.411747	27.5593	27.3481	26.9574	27.1511	26.9307	27.2022
P50395;P50395-2	P50395;P50395-2	Rab GDP dissociation inhibitor beta	GDI2	-	-	-	YES	-0.195967	0.476347	30.5433	29.5829	29.8675	29.983	29.7763	29.6464
Q13185	Q13185	Chromobox protein homolog 3	CBX3	-	-	-	-	-0.201813	0.482211	29.1407	28.8757	28.4197	28.8065	28.5765	28.4477
P31948;P31948-3;P31948-2	P31948;P31948-3;P31948-2	Stress-induced-phosphoprotein 1	STIP1	-	-	-	-	-0.207033	0.518422	30.4831	29.9742	29.1991	29.8111	29.648	29.5762
P20618	P20618	Proteasome subunit beta type-1	PSMB1	-	-	-	YES	-0.215643	0.659521	27.3077	26.2714	26.3278	26.4593	26.5555	26.2452
P49321;P49321-3;P49321-4;P49321-2	P49321;P49321-3;P49321-4;P49321-2	Nuclear autoantigenic sperm protein	NASP	-	-	-	-	-0.226327	0.436033	28.7711	28.8418	28.306	28.4408	28.2063	28.5929
Q15366-6;Q15366-3;Q15366;Q15366-2;Q15366-7;Q15366-8;Q15366-4;Q15366-5	Q15366-6;Q15366-3;Q15366;Q15366-2;Q15366-7;Q15366-8;Q15366-4;Q15366-5	Poly(rC)-binding protein 2	PCBP2	-	-	-	YES	-0.23043	0.577066	25.8616	25.4027	25.0509	25.7506	25.2104	24.6629
Q9NPR2-2;Q9NPR2	Q9NPR2-2;Q9NPR2	Semaphorin-4B	SEMA4B	YES	Matrisome-associated	ECM-affiliated Proteins	-	-0.242363	0.417212	24.6963	24.8971	24.4065	23.7293	24.7402	24.8033
O14818;O14818-2;O14818-4;Q8TAA3-2;Q8TAA3-5;Q8TAA3	O14818;O14818-2	Proteasome subunit alpha type-7	PSMA7	-	-	-	YES	-0.2618	0.31275	28.348	28.5424	27.9021	28.3628	27.9191	27.7252
P67936	P67936	Tropomyosin alpha-4 chain	TPM4	-	-	-	YES	-0.26627	0.334678	30.0578	30.1152	29.6187	29.3535	29.6798	29.9595
P04040	P04040	Catalase	CAT	-	-	-	YES	-0.273367	0.347317	27.081	27.2181	26.0909	26.281	26.8575	26.4314
O75688-4;O75688-2;O75688;O75688-3;P35813-2;O75688-5;P35813;P35813-3	O75688-4;O75688-2;O75688;O75688-3;P35813-2;O75688-5;P35813;P35813-3	Protein phosphatase 1B;Protein phosphatase 1A	PPM1B;PPM1A	-	-	-	-	-0.275623	0.297874	24.6884	25.1418	23.9859	24.2069	24.4433	24.3391
Q9UK76;Q9UK76-2;Q9UK76-3	Q9UK76;Q9UK76-2	Hematological and neurological expressed 1 protein;Hematological and neurological expressed 1 protein, N-terminally processed	HN1	-	-	-	-	-0.275647	0.612033	25.7995	26.3928	25.7461	25.4603	25.3354	26.3158
Q13435	Q13435	Splicing factor 3B subunit 2	SF3B2	-	-	-	-	-0.282463	0.458624	26.144	26.0643	24.9349	25.7497	25.3881	25.1581
Q16576;Q16576-2	Q16576;Q16576-2	Histone-binding protein RBBP7	RBBP7	-	-	-	-	-0.28588	0.192743	28.2851	28.5565	28.0872	28.0696	27.8675	28.134
Q9UKK9	Q9UKK9	ADP-sugar pyrophosphatase	NUDT5	-	-	-	YES	-0.293143	0.269379	27.6322	27.5727	27.7356	27.457	27.2349	27.3693
O00560;O00560-3;O00560-2	O00560;O00560-3;O00560-2	Syntenin-1	SDCBP	-	-	-	YES	-0.29716	0.349067	27.3171	27.0671	26.4875	26.7748	26.9221	26.2833
Q9UHV9	Q9UHV9	Prefoldin subunit 2	PFDN2	-	-	-	-	-0.303527	0.654859	27.6087	27.3195	27.0091	27.2806	26.956	26.7902
P60660-2;P60660;P14649	P60660-2;P60660	Myosin light polypeptide 6	MYL6	-	-	-	YES	-0.30429	0.147498	30.0805	29.9487	30.0572	29.7288	29.743	29.7018
O75821	O75821	Eukaryotic translation initiation factor 3 subunit G	EIF3G	-	-	-	-	-0.305907	0.334495	27.1709	26.9591	26.1748	26.3361	26.6889	26.3622
P61088;Q5JXB2	P61088;Q5JXB2	Ubiquitin-conjugating enzyme E2 N;Putative ubiquitin-conjugating enzyme E2 N-like	UBE2N;UBE2NL	-	-	-	-	-0.30634	0.454951	28.1053	28.2429	26.4432	27.4935	27.5526	26.8263
P53999	P53999	Activated RNA polymerase II transcriptional coactivator p15	SUB1	-	-	-	YES	-0.309727	0.698843	27.5503	27.7023	26.0581	26.7997	26.8277	26.7542
Q96FW1;Q96FW1-2	Q96FW1;Q96FW1-2	Ubiquitin thioesterase OTUB1	OTUB1	-	-	-	YES	-0.319683	0.205394	27.8389	27.8628	27.9308	27.5943	27.3789	27.7002
P06748-2;P06748;P06748-3	P06748-2;P06748;P06748-3	Nucleophosmin	NPM1	-	-	-	-	-0.33039	0.258576	32.4037	32.6657	31.67	31.8766	31.8291	32.0425
P09497-2;P09497	P09497-2;P09497	Clathrin light chain B	CLTB	-	-	-	-	-0.331127	0.435962	25.5727	25.9538	25.9255	25.8288	25.6699	24.9599
Q13561;Q13561-3;Q13561-2	Q13561;Q13561-3;Q13561-2	Dynactin subunit 2	DCTN2	-	-	-	YES	-0.333267	0.169	26.9311	26.6218	26.3413	26.4573	26.3791	26.0581
Q9BWD1;Q9BWD1-2	Q9BWD1;Q9BWD1-2	Acetyl-CoA acetyltransferase, cytosolic	ACAT2	-	-	-	YES	-0.33658	0.334439	26.6596	26.1471	26.4045	26.3186	26.1146	25.7683
P25685;P25685-2	P25685;P25685-2	DnaJ homolog subfamily B member 1	DNAJB1	-	-	-	YES	-0.347803	0.308798	25.8556	26.123	25.2094	25.4158	25.63	25.0989
P62258;P62258-2	P62258;P62258-2	14-3-3 protein epsilon	YWHAE	-	-	-	YES	-0.355437	0.145862	32.0722	32.1716	31.5951	31.4175	31.5704	31.7847
O95817	O95817	BAG family molecular chaperone regulator 3	BAG3	-	-	-	-	-0.355537	0.499881	26.4087	25.4519	24.2483	23.9249	25.6473	25.4702
P67775;P62714;P67775-2	P67775;P62714;P67775-2	Serine/threonine-protein phosphatase 2A catalytic subunit alpha isoform;Serine/threonine-protein phosphatase 2A catalytic subunit beta isoform	PPP2CA;PPP2CB	-	-	-	-	-0.360793	0.465366	25.9946	25.224	25.4264	23.8226	26.0831	25.657
P25398	P25398	40S ribosomal protein S12	RPS12	-	-	-	-	-0.37421	0.172845	29.2992	28.8533	29.2363	28.881	28.7765	28.6086
P09493-3;P09493-4;P09493-10;P09493-9;P09493-8;P09493	P09493-3;P09493-4;P09493-10;P09493-9;P09493-8;P09493	Tropomyosin alpha-1 chain	TPM1	-	-	-	-	-0.37985	0.669314	27.2177	27.318	27.3111	26.8226	26.917	26.9677
P31942-3;P31942-2;P31942;P31942-4;P31942-6;P31942-5	P31942-3;P31942-2;P31942;P31942-4	Heterogeneous nuclear ribonucleoprotein H3	HNRNPH3	-	-	-	-	-0.381747	0.245094	27.4941	27.2374	26.1643	26.4696	26.9056	26.3754
O75531	O75531	Barrier-to-autointegration factor;Barrier-to-autointegration factor, N-terminally processed	BANF1	-	-	-	-	-0.385993	0.576366	27.1765	26.5302	27.2678	26.8569	26.4182	26.5415
P06753-2;P06753-3;P06753-6;P06753-5;P06753-4;P06753-7	P06753-2;P06753-3;P06753-6;P06753-5;P06753-4	Tropomyosin alpha-3 chain	TPM3	-	-	-	YES	-0.386283	0.172095	31.8367	32.1275	31.5445	31.1282	31.3602	31.8615
P25786;P25786-2	P25786;P25786-2	Proteasome subunit alpha type-1	PSMA1	-	-	-	YES	-0.39186	0.121115	27.4715	27.9439	27.047	27.0867	27.1343	27.0658
P11142;P11142-2;P54652	P11142;P11142-2	Heat shock cognate 71 kDa protein	HSPA8	-	-	-	YES	-0.3958	0.0734137	32.8296	32.7662	32.8007	32.4582	32.3428	32.4083
P14868;P14868-2	P14868;P14868-2	Aspartate--tRNA ligase, cytoplasmic	DARS	-	-	-	YES	-0.396137	0.305669	27.0307	27.4729	25.7691	26.2735	26.5019	26.3088
O43707;O43707-2;O43707-3;Q9H254-2;Q9H254-4;Q9H254	O43707;O43707-2;O43707-3	Alpha-actinin-4	ACTN4	-	-	-	YES	-0.39966	0.0553325	32.9401	32.8373	32.5445	32.4294	32.2924	32.4011
Q15056-2;Q15056	Q15056-2;Q15056	Eukaryotic translation initiation factor 4H	EIF4H	-	-	-	-	-0.40166	0.206193	28.1004	27.6891	27.0021	27.3249	27.4501	26.8115
P62937;P62937-2;P0DN26;A0A0B4J2A2;A0A075B759;Q9Y536;F5H284;P0DN37;O43447-2	P62937;P62937-2	Peptidyl-prolyl cis-trans isomerase A;Peptidyl-prolyl cis-trans isomerase A, N-terminally processed	PPIA	-	-	-	YES	-0.404743	0.290315	31.8034	31.5483	30.3058	30.8474	31.2908	30.3051
P53621;P53621-2	P53621;P53621-2	Coatomer subunit alpha;Xenin;Proxenin	COPA	-	-	-	YES	-0.408567	0.220867	26.2154	25.9093	25.1152	25.6258	25.7738	24.6146
Q9UBT2;Q9UBT2-2	Q9UBT2;Q9UBT2-2	SUMO-activating enzyme subunit 2	UBA2	-	-	-	-	-0.41184	0.326254	26.0128	25.5489	25.4278	25.73	25.2561	24.7678
P26373;P26373-2	P26373;P26373-2	60S ribosomal protein L13	RPL13	-	-	-	-	-0.414503	0.442751	25.6943	26.4567	28.1023	26.4802	25.8579	26.6717
Q9NRX4-2;Q9NRX4	Q9NRX4-2;Q9NRX4	14 kDa phosphohistidine phosphatase	PHPT1	-	-	-	YES	-0.415077	0.435387	25.8807	24.9223	27.6244	25.6981	26.1604	25.3238
P37802;P37802-2;Q9UI15	P37802;P37802-2	Transgelin-2	TAGLN2	-	-	-	YES	-0.42039	0.226031	30.1344	29.9066	28.7678	29.3136	29.233	29.0011
Q05048	Q05048	Cleavage stimulation factor subunit 1	CSTF1	-	-	-	-	-0.43121	0.239482	25.2253	25.3287	25.0161	24.4978	25.1439	24.6348
P23246;P23246-2	P23246;P23246-2	Splicing factor, proline- and glutamine-rich	SFPQ	-	-	-	-	-0.431663	0.149561	29.4285	29.5325	28.5792	28.7968	28.923	28.5253
P49736	P49736	DNA replication licensing factor MCM2	MCM2	-	-	-	-	-0.440493	0.299356	25.2016	25.4282	24.2318	24.4808	24.4675	24.5919
P28066;P28066-2	P28066;P28066-2	Proteasome subunit alpha type-5	PSMA5	-	-	-	YES	-0.444417	0.0831838	29.5861	29.0873	29.1249	28.9653	28.564	28.9358
P01040	P01040	Cystatin-A;Cystatin-A, N-terminally processed	CSTA	YES	Matrisome-associated	ECM Regulators	-	-0.458337	0.56758	26.4012	26.7545	29.0574	26.3334	27.4403	27.0644
P49720	P49720	Proteasome subunit beta type-3	PSMB3	-	-	-	YES	-0.46426	0.215672	26.4223	26.0522	26.1756	25.9017	25.8315	25.5241
Q15233;Q15233-2	Q15233;Q15233-2	Non-POU domain-containing octamer-binding protein	NONO	-	-	-	-	-0.464427	0.353662	28.8955	28.5087	26.8872	28.103	27.6375	27.1576
P35244	P35244	Replication protein A 14 kDa subunit	RPA3	-	-	-	-	-0.46542	0.205721	25.6778	25.963	25.9332	25.6409	25.3951	25.1418
P16403	P16403	Histone H1.2	HIST1H1C	-	-	-	-	-0.471023	0.260084	26.0981	25.8989	26.5952	25.8973	25.6752	25.6066
Q06830	Q06830	Peroxiredoxin-1	PRDX1	-	-	-	YES	-0.47123	0.0758103	32.3002	32.2723	31.483	31.6771	31.5993	31.3656
P12004	P12004	Proliferating cell nuclear antigen	PCNA	-	-	-	YES	-0.475817	0.131691	28.2933	29.0599	27.8799	27.6126	28.0391	28.1538
O75534-2;O75534;O75534-3;O75534-4	O75534-2;O75534;O75534-3;O75534-4	Cold shock domain-containing protein E1	CSDE1	-	-	-	-	-0.47635	0.285877	26.4522	26.3416	24.4721	24.9839	25.5478	25.3051
P84090	P84090	Enhancer of rudimentary homolog	ERH	-	-	-	-	-0.476583	0.225617	27.1253	28.368	26.4175	26.5905	26.9905	26.9
Q07666-3;Q07666-2;Q07666;O75525-2;O75525;Q5VWX1	Q07666-3;Q07666-2;Q07666	KH domain-containing, RNA-binding, signal transduction-associated protein 1	KHDRBS1	-	-	-	-	-0.481527	0.191742	27.0083	27.4085	26.3326	26.6465	26.6345	26.0239
Q99436;Q99436-2	Q99436	Proteasome subunit beta type-7	PSMB7	-	-	-	-	-0.48573	0.0968337	28.6507	28.0436	27.8815	27.8837	27.6651	27.5699
P33176;O60282;Q12840;O60282-2	P33176	Kinesin-1 heavy chain	KIF5B	-	-	-	-	-0.487427	0.140157	26.4965	26.557	25.2529	25.5729	25.8351	25.4361
Q32MZ4-3;Q32MZ4-2;Q32MZ4;Q32MZ4-4	Q32MZ4-3;Q32MZ4-2;Q32MZ4;Q32MZ4-4	Leucine-rich repeat flightless-interacting protein 1	LRRFIP1	-	-	-	-	-0.487513	0.238126	26.6675	26.5537	26.0756	25.703	25.9185	26.2127
O94907;Q9UBU2	O94907	Dickkopf-related protein 1	DKK1	-	-	-	-	-0.492783	0.368221	29.7165	28.9677	29.3213	28.0522	28.8428	29.6322
Q96KP4;Q96KP4-2	Q96KP4;Q96KP4-2	Cytosolic non-specific dipeptidase	CNDP2	-	-	-	YES	-0.493073	0.0497897	28.5665	28.144	28.0816	27.7611	27.7652	27.7866
P31947;P31947-2	P31947;P31947-2	14-3-3 protein sigma	SFN	-	-	-	YES	-0.49432	0.0635877	29.652	29.6598	28.8235	28.8151	28.7778	29.0594
P07237	P07237	Protein disulfide-isomerase	P4HB	-	-	-	YES	-0.494457	0.0433022	30.6968	30.4668	30.1739	29.9241	29.6571	30.273
P29508;P29508-2;P48594	P29508;P29508-2;P48594	Serpin B3;Serpin B4	SERPINB3;SERPINB4	-	-	-	-	-0.494957	0.636683	25.4751	24.3126	28.2238	24.5181	28.0108	23.9977
Q12765-3;Q12765;Q12765-2	Q12765-3;Q12765;Q12765-2	Secernin-1	SCRN1	-	-	-	-	-0.510033	0.157287	27.4105	28.2265	27.4857	26.8448	27.3162	27.4316
Q14764	Q14764	Major vault protein	MVP	-	-	-	YES	-0.51416	0.0994737	26.6352	26.8076	25.507	25.8926	25.7838	25.7308
P31943	P31943	Heterogeneous nuclear ribonucleoprotein H;Heterogeneous nuclear ribonucleoprotein H, N-terminally processed	HNRNPH1	-	-	-	-	-0.514943	0.0847239	29.3746	28.2666	29.07	28.4006	28.48	28.2858
Q9UQ80;Q9UQ80-2	Q9UQ80;Q9UQ80-2	Proliferation-associated protein 2G4	PA2G4	-	-	-	YES	-0.51743	0.107414	30.2262	29.994	28.9346	29.1886	29.3703	29.0436
O60568	O60568	Procollagen-lysine,2-oxoglutarate 5-dioxygenase 3	PLOD3	YES	Matrisome-associated	ECM Regulators	YES	-0.51969	0.064267	27.6179	27.7288	27.6142	27.2276	27.2474	26.9268
P13861-2;P13861	P13861-2;P13861	cAMP-dependent protein kinase type II-alpha regulatory subunit	PRKAR2A	-	-	-	YES	-0.52601	0.0812097	31.9648	32.0032	30.9242	31.2384	31.0876	30.9882
P06733;P06733-2;P13929-3;P13929-2;P13929	P06733;P06733-2	Alpha-enolase	ENO1	-	-	-	YES	-0.541273	0.0203699	33.1737	32.901	32.7275	32.4859	32.3406	32.3519
P63241;P63241-2;Q6IS14;Q9GZV4	P63241;P63241-2;Q6IS14	Eukaryotic translation initiation factor 5A-1;Eukaryotic translation initiation factor 5A-1-like	EIF5A;EIF5AL1	-	-	-	-	-0.550863	0.259745	29.8699	29.5703	27.5862	28.6536	28.745	27.9751
Q9HAV7	Q9HAV7	GrpE protein homolog 1, mitochondrial	GRPEL1	-	-	-	-	-0.551597	0.339037	26.3426	24.5869	25.6127	24.83	25.453	24.6043
P82979	P82979	SAP domain-containing ribonucleoprotein	SARNP	-	-	-	-	-0.558707	0.144188	26.9991	27.0471	25.6903	26.3047	25.8651	25.8906
P61247	P61247	40S ribosomal protein S3a	RPS3A	-	-	-	YES	-0.56322	0.063815	27.1173	27.7537	27.1843	27.0074	26.8235	26.5348
P33240-2;P33240	P33240-2;P33240	Cleavage stimulation factor subunit 2	CSTF2	-	-	-	-	-0.570173	0.153158	27.1874	27.1094	25.8768	26.419	26.3005	25.7435
Q15181	Q15181	Inorganic pyrophosphatase	PPA1	-	-	-	YES	-0.576923	0.0289956	29.1279	28.6659	28.5579	28.3496	28.047	28.2244
Q9NQG5	Q9NQG5	Regulation of nuclear pre-mRNA domain-containing protein 1B	RPRD1B	-	-	-	-	-0.579187	0.0924906	25.5974	25.8267	24.9466	25.0983	24.9958	24.539
O75506	O75506	Heat shock factor-binding protein 1	HSBP1	-	-	-	-	-0.582913	0.137255	26.7142	26.7318	25.7144	26.0854	25.6752	25.6511
P52907	P52907	F-actin-capping protein subunit alpha-1	CAPZA1	-	-	-	YES	-0.58544	0.0261681	29.1561	28.6354	28.3555	28.3481	28.018	28.0245
P07900;P07900-2;Q14568;Q58FG0;Q58FG1	P07900;P07900-2	Heat shock protein HSP 90-alpha	HSP90AA1	-	-	-	YES	-0.594313	0.0280483	31.97	31.7984	31.2569	31.0083	30.9939	31.2402
Q9HC38-2;Q9HC38;Q9HC38-3	Q9HC38-2;Q9HC38;Q9HC38-3	Glyoxalase domain-containing protein 4	GLOD4	-	-	-	YES	-0.596323	0.101229	27.0262	26.4376	25.9557	25.8225	26.0333	25.7747
P08123	P08123	Collagen alpha-2(I) chain	COL1A2	YES	Core matrisome	Collagens	YES	-0.602723	0.310478	24.8403	24.0892	26.7296	24.7365	23.9366	25.1779
Q92900-2;Q92900	Q92900-2;Q92900	Regulator of nonsense transcripts 1	UPF1	-	-	-	-	-0.614827	0.184376	23.5713	23.8532	25.7979	23.7185	23.7154	23.944
P19623	P19623	Spermidine synthase	SRM	-	-	-	-	-0.617143	0.0106774	27.1145	27.1163	27.206	26.3958	26.6728	26.5167
P62081	P62081	40S ribosomal protein S7	RPS7	-	-	-	-	-0.624677	0.173308	26.6246	26.4868	24.8398	25.4219	25.0518	25.6034
Q9Y5S9;Q9Y5S9-2	Q9Y5S9;Q9Y5S9-2	RNA-binding protein 8A	RBM8A	-	-	-	-	-0.626403	0.043805	27.6802	28.1301	27.3036	27.0334	27.1588	27.0425
Q9UMS4	Q9UMS4	Pre-mRNA-processing factor 19	PRPF19	-	-	-	-	-0.647597	0.123184	27.4725	27.2057	25.7566	26.6655	25.8809	25.9458
P46778	P46778	60S ribosomal protein L21	RPL21	-	-	-	-	-0.65337	0.027552	25.4259	25.8987	25.6477	24.6944	24.919	25.3987
Q14696;Q14696-2	Q14696	LDLR chaperone MESD	MESDC2	-	-	-	-	-0.662773	0.456571	26.1904	26.7432	24.1593	24.2423	25.4507	25.4115
P46108;P46108-2	P46108;P46108-2	Adapter molecule crk	CRK	-	-	-	YES	-0.667153	0.0794783	27.6401	27.3474	26.9185	26.9476	26.8832	26.0738
P10909-4;P10909;P10909-5;P10909-2;P10909-3	P10909-4;P10909;P10909-5;P10909-2;P10909-3	Clusterin;Clusterin beta chain;Clusterin alpha chain	CLU	-	-	-	YES	-0.66956	0.0322947	30.4705	30.4448	30.1675	29.5703	29.6253	29.8786
P21333-2;P21333	P21333-2;P21333	Filamin-A	FLNA	-	-	-	YES	-0.676557	0.00384796	32.3228	32.0575	32.1689	31.6638	31.4646	31.3911
Q9NPH3-3;Q9NPH3-2;Q9NPH3;Q9NPH3-5	Q9NPH3-3;Q9NPH3-2;Q9NPH3;Q9NPH3-5	Interleukin-1 receptor accessory protein	IL1RAP	-	-	-	-	-0.677827	0.087621	25.3876	25.0563	25.8969	24.6343	24.5854	25.0876
P62851	P62851	40S ribosomal protein S25	RPS25	-	-	-	YES	-0.679893	0.196117	26.2082	26.454	24.4132	25.1532	24.9353	24.9472
P55786;P55786-2;A6NEC2;A6NEC2-3;A6NEC2-2	P55786;P55786-2	Puromycin-sensitive aminopeptidase	NPEPPS	-	-	-	YES	-0.69079	0.00427736	27.7132	27.6433	27.3241	26.8411	26.9579	26.8092
Q16777;Q6FI13	Q16777;Q6FI13	Histone H2A type 2-C;Histone H2A type 2-A	HIST2H2AC;HIST2H2AA3	-	-	-	-	-0.704743	0.203605	29.0861	29.2752	26.645	27.7639	27.5131	27.615
P98179	P98179	RNA-binding protein 3	RBM3	-	-	-	-	-0.70803	0.0418709	25.9874	26.8219	26.0096	25.6332	25.8333	25.2283
P39023;Q92901	P39023	60S ribosomal protein L3	RPL3	-	-	-	YES	-0.708353	0.0748931	26.8595	27.1862	28.0489	26.4266	26.2774	27.2654
Q9Y265;Q9Y265-2	Q9Y265;Q9Y265-2	RuvB-like 1	RUVBL1	-	-	-	YES	-0.712827	0.0367162	26.9751	27.5637	26.4836	26.4924	26.231	26.1605
P17980	P17980	26S protease regulatory subunit 6A	PSMC3	-	-	-	-	-0.716587	0.00914679	28.0267	27.859	27.2601	26.9857	27.0735	26.937
Q9Y224	Q9Y224	UPF0568 protein C14orf166	C14orf166	-	-	-	-	-0.718343	0.0527956	25.5605	25.227	24.8649	24.8361	24.487	24.1743
O00233;O00233-2;O00233-3	O00233;O00233-2	26S proteasome non-ATPase regulatory subunit 9	PSMD9	-	-	-	-	-0.724037	0.0805795	25.6278	26.0841	25.1676	25.492	23.8861	25.3292
Q92598-2;Q92598-3;Q92598;Q92598-4	Q92598-2;Q92598-3;Q92598;Q92598-4	Heat shock protein 105 kDa	HSPH1	-	-	-	YES	-0.72939	0.00448808	28.8924	28.499	28.3937	28.0438	27.6921	27.8609
Q8WUM4;Q8WUM4-2;Q8WUM4-3	Q8WUM4;Q8WUM4-2	Programmed cell death 6-interacting protein	PDCD6IP	-	-	-	YES	-0.731307	0.0299752	27.1336	27.3909	26.6814	26.436	26.6618	25.9141
P43686-2;P43686	P43686-2;P43686	26S protease regulatory subunit 6B	PSMC4	-	-	-	-	-0.742347	0.0133737	27.6535	27.1897	26.7935	26.7176	26.4004	26.2916
P29966	P29966	Myristoylated alanine-rich C-kinase substrate	MARCKS	-	-	-	YES	-0.748527	0.0732932	27.1802	27.2354	26.3529	25.5545	26.082	26.8864
Q13177;O75914-2;Q13153;Q13153-2;O75914;O75914-4;O75914-3	Q13177;O75914-2;Q13153;Q13153-2;O75914;O75914-4;O75914-3	Serine/threonine-protein kinase PAK 2;PAK-2p27;PAK-2p34;Serine/threonine-protein kinase PAK 3;Serine/threonine-protein kinase PAK 1	PAK2;PAK3;PAK1	-	-	-	-	-0.751233	0.049493	26.4735	26.4003	25.3478	25.4526	25.2897	25.2256
Q7KZF4	Q7KZF4	Staphylococcal nuclease domain-containing protein 1	SND1	-	-	-	YES	-0.75296	0.00830938	29.02	28.6995	28.4258	28.1277	27.9443	27.8145
P47756-2;P47756	P47756-2;P47756	F-actin-capping protein subunit beta	CAPZB	-	-	-	YES	-0.753997	0.00272342	28.925	28.9486	28.5562	27.9665	28.2325	27.9688
P09429;B2RPK0	P09429	High mobility group protein B1	HMGB1	-	-	-	-	-0.755853	0.0552954	28.0373	27.4217	27.3237	27.5549	26.5023	26.4579
Q15102	Q15102	Platelet-activating factor acetylhydrolase IB subunit gamma	PAFAH1B3	-	-	-	-	-0.756167	0.133118	26.6067	27.0746	24.842	25.9476	25.4504	24.8568
Q92688-2;Q92688	Q92688-2;Q92688	Acidic leucine-rich nuclear phosphoprotein 32 family member B	ANP32B	-	-	-	YES	-0.76986	0.361448	27.0411	26.4564	26.8648	27.3605	26.8057	23.8865
P68371;P04350	P68371;P04350	Tubulin beta-4B chain;Tubulin beta-4A chain	TUBB4B;TUBB4A	-	-	-	-	-0.774027	0.0084358	32.6015	32.1516	31.8125	31.6066	31.3672	31.2697
P34931	P34931	Heat shock 70 kDa protein 1-like	HSPA1L	-	-	-	-	-0.784693	0.601349	29.7297	23.4887	28.8979	28.4819	28.2848	22.9956
P07339	P07339	Cathepsin D;Cathepsin D light chain;Cathepsin D heavy chain	CTSD	YES	Matrisome-associated	ECM Regulators	YES	-0.792507	0.00698603	31.452	30.7122	30.7478	30.2431	30.3404	29.951
O60506-4;O60506-3;O60506-2;O60506;O60506-5	O60506-4;O60506-3;O60506-2;O60506;O60506-5	Heterogeneous nuclear ribonucleoprotein Q	SYNCRIP	-	-	-	-	-0.803767	0.0927671	28.3811	28.2167	26.7437	27.29	27.1826	26.4575
P62318-2;P62318	P62318-2;P62318	Small nuclear ribonucleoprotein Sm D3	SNRPD3	-	-	-	-	-0.806557	0.334812	28.6358	28.7935	27.7981	27.7148	27.5977	27.4953
P00441	P00441	Superoxide dismutase [Cu-Zn]	SOD1	-	-	-	YES	-0.807663	0.246736	26.663	26.3472	26.1225	26.3984	23.5056	26.8057
P37837	P37837	Transaldolase	TALDO1	-	-	-	YES	-0.815293	0.00440751	29.1156	28.5802	28.1948	27.9798	27.6331	27.832
O95394;O95394-4;O95394-3	O95394;O95394-4;O95394-3	Phosphoacetylglucosamine mutase	PGM3	-	-	-	-	-0.820233	0.224517	26.7339	26.482	26.023	25.8449	25.3052	25.6281
P61981	P61981	14-3-3 protein gamma;14-3-3 protein gamma, N-terminally processed	YWHAG	-	-	-	YES	-0.84149	0.0018305	30.1677	30.4867	29.8519	29.2216	29.2077	29.5526
Q04917	Q04917	14-3-3 protein eta	YWHAH	-	-	-	YES	-0.850057	0.0035432	29.0413	29.0745	28.5348	27.9354	28.042	28.1231
P45974-2;P45974;Q92995-2;Q92995	P45974-2;P45974	Ubiquitin carboxyl-terminal hydrolase 5	USP5	-	-	-	-	-0.85394	0.00389438	28.4111	28.2743	27.7121	27.3164	27.3489	27.1704
Q9Y2B0;Q9Y2B0-2	Q9Y2B0	Protein canopy homolog 2	CNPY2	-	-	-	-	-0.854513	0.0345382	27.1388	27.5469	25.7215	26.0455	25.5962	26.2019
P62993;P62993-2	P62993;P62993-2	Growth factor receptor-bound protein 2	GRB2	-	-	-	YES	-0.869963	0.0193705	27.8755	27.5737	27.0511	26.6693	26.9024	26.3187
P63220	P63220	40S ribosomal protein S21	RPS21	-	-	-	-	-0.872703	0.0328425	28.2117	28.4467	27.4731	27.1151	27.6013	26.797
P49915-2;P49915	P49915-2;P49915	GMP synthase [glutamine-hydrolyzing]	GMPS	-	-	-	-	-0.876597	0.107193	26.4817	26.0782	24.2314	25.1618	24.7288	24.2709
P38159;P38159-3;P38159-2;Q96E39;O75526;Q8N7X1	P38159;P38159-3;P38159-2;Q96E39;O75526	RNA-binding motif protein, X chromosome;RNA-binding motif protein, X chromosome, N-terminally processed;RNA binding motif protein, X-linked-like-1;RNA-binding motif protein, X-linked-like-2	RBMX;RBMXL1;RBMXL2	-	-	-	-	-0.878887	0.094618	26.484	26.0613	24.7377	24.3426	25.5216	24.7822
Q99426-2;Q99426	Q99426-2;Q99426	Tubulin-folding cofactor B	TBCB	-	-	-	-	-0.886463	0.0601666	27.0883	27.7176	26.0936	25.3137	25.9869	26.9394
Q9BS26	Q9BS26	Endoplasmic reticulum resident protein 44	ERP44	-	-	-	YES	-0.88704	0.152606	27.5328	28.1589	25.9482	26.7305	26.4901	25.7582
Q96C19;Q9BUP0-2;Q9BUP0	Q96C19	EF-hand domain-containing protein D2	EFHD2	-	-	-	-	-0.893083	0.169367	25.5238	27.182	25.3809	25.3039	24.9618	25.1418
Q71DI3;P84243;P68431;Q6NXT2;Q16695	Q71DI3;P84243;P68431;Q6NXT2;Q16695	Histone H3.2;Histone H3.3;Histone H3.1;Histone H3.3C;Histone H3.1t	HIST2H3A;H3F3A;HIST1H3A;H3F3C;HIST3H3	-	-	-	-	-0.89369	0.344754	26.4669	26.73	26.812	24.3385	25.6192	27.3701
P39687;O43423;O95626	P39687	Acidic leucine-rich nuclear phosphoprotein 32 family member A	ANP32A	-	-	-	-	-0.90127	0.00947198	29.1133	29.3543	28.6214	28.3543	27.6925	28.3384
P15880	P15880	40S ribosomal protein S2	RPS2	-	-	-	YES	-0.914437	0.01675	26.1041	25.3514	25.0673	25.1899	24.6226	23.9671
P52597	P52597	Heterogeneous nuclear ribonucleoprotein F;Heterogeneous nuclear ribonucleoprotein F, N-terminally processed	HNRNPF	-	-	-	-	-0.922567	0.00193142	28.1918	28.4613	28.0644	27.4309	27.1507	27.3682
P49327	P49327	Fatty acid synthase;[Acyl-carrier-protein] S-acetyltransferase;[Acyl-carrier-protein] S-malonyltransferase;3-oxoacyl-[acyl-carrier-protein] synthase;3-oxoacyl-[acyl-carrier-protein] reductase;3-hydroxyacyl-[acyl-carrier-protein] dehydratase;Enoyl-[acyl-carrier-protein] reductase;Oleoyl-[acyl-carrier-protein] hydrolase	FASN	-	-	-	YES	-0.930497	0.127274	29.7354	29.2878	27.4901	28.2811	28.0633	27.3774
O75223;O75223-3;O75223-2;O75223-4	O75223;O75223-3;O75223-2;O75223-4	Gamma-glutamylcyclotransferase	GGCT	-	-	-	YES	-0.932693	0.00928179	27.9685	27.7234	27.5775	26.3229	27.5909	26.5575
P25705;P25705-2;P25705-3	P25705;P25705-2;P25705-3	ATP synthase subunit alpha, mitochondrial	ATP5A1	-	-	-	-	-0.946863	0.221114	27.7774	27.7747	25.551	26.0691	26.0965	26.097
Q12792;Q12792-4;Q12792-3	Q12792;Q12792-4;Q12792-3	Twinfilin-1	TWF1	-	-	-	-	-0.94946	0.00779328	27.5197	27.4924	26.2178	25.9988	26.0763	26.3064
Q15020-4;Q15020;Q15020-3;Q15020-2	Q15020-4;Q15020;Q15020-3;Q15020-2	Squamous cell carcinoma antigen recognized by T-cells 3	SART3	-	-	-	-	-0.952543	0.0905946	23.7749	25.3662	23.2807	23.0047	23.317	23.2425
P61970	P61970	Nuclear transport factor 2	NUTF2	-	-	-	YES	-0.952833	0.00408364	28.6707	28.4567	27.9941	27.6816	27.3857	27.1957
P07737;CON__P02584	P07737	Profilin-1	PFN1	-	-	-	YES	-0.964277	0.0205202	30.4928	30.1845	29.1863	29.3666	29.1227	28.4814
Q92945	Q92945	Far upstream element-binding protein 2	KHSRP	-	-	-	-	-0.96737	0.00228958	28.8243	28.6401	28.3279	27.7106	27.8303	27.3493
P50502;Q8NFI4;Q8IZP2	P50502;Q8NFI4;Q8IZP2	Hsc70-interacting protein;Putative protein FAM10A5;Putative protein FAM10A4	ST13;ST13P5;ST13P4	-	-	-	-	-0.971807	0.00350776	27.3829	27.2374	26.5386	26.2258	25.7622	26.2555
Q15262-2;Q15262-3;Q15262-4;Q15262	Q15262-2;Q15262-3;Q15262-4;Q15262	Receptor-type tyrosine-protein phosphatase kappa	PTPRK	-	-	-	-	-0.972583	0.000587036	27.2768	27.7278	27.8016	26.602	26.8365	26.4499
Q86VP6-2;Q86VP6;Q86VP6-3	Q86VP6-2;Q86VP6	Cullin-associated NEDD8-dissociated protein 1	CAND1	-	-	-	YES	-0.972653	0.00464597	28.4419	27.7244	27.1746	27.078	26.7468	26.5983
P13639	P13639	Elongation factor 2	EEF2	-	-	-	YES	-0.977073	0.00129066	31.3536	30.8399	30.5637	30.205	29.872	29.7491
Q9UKY7-2;Q9UKY7;Q9UKY7-3	Q9UKY7-2;Q9UKY7	Protein CDV3 homolog	CDV3	-	-	-	-	-0.985153	0.110981	26.6499	27.0928	24.9599	25.4282	24.9104	25.4086
P80723;P80723-2	P80723;P80723-2	Brain acid soluble protein 1	BASP1	-	-	-	YES	-0.985337	0.0184571	27.1564	27.6341	27.4975	25.586	26.6125	27.1335
P51858;P51858-2;P51858-3;Q9Y3E1;O75475-3;O75475-2;O75475;Q7Z4V5-4;Q7Z4V5-3	P51858;P51858-2;P51858-3	Hepatoma-derived growth factor	HDGF	-	-	-	-	-1.03955	0.000624763	29.6566	29.2651	29.18	28.2988	28.0882	28.5962
Q9Y3I0	Q9Y3I0	tRNA-splicing ligase RtcB homolog	RTCB	-	-	-	-	-1.04191	0.00141225	26.5218	26.3219	25.7679	25.2601	25.2067	25.019
P06744;P06744-2;CON__Q3ZBD7;Q8N196	P06744;P06744-2	Glucose-6-phosphate isomerase	GPI	-	-	-	YES	-1.05302	0.00438238	30.1114	28.9786	29.63	28.9461	28.472	28.1429
P31939-2;P31939	P31939-2;P31939	Bifunctional purine biosynthesis protein PURH;Phosphoribosylaminoimidazolecarboxamide formyltransferase;IMP cyclohydrolase	ATIC	-	-	-	YES	-1.06366	0.00451426	29.1854	29.1887	27.9068	27.9465	27.5351	27.6082
P61457	P61457	Pterin-4-alpha-carbinolamine dehydratase	PCBD1	-	-	-	YES	-1.06626	0.00373315	26.5838	26.9784	26.4558	26.0821	25.7741	24.963
P31949	P31949	Protein S100-A11;Protein S100-A11, N-terminally processed	S100A11	YES	Matrisome-associated	Secreted Factors	YES	-1.07045	0.109648	29.5922	28.4415	26.6024	27.1943	27.638	26.5925
P63261	P63261	Actin, cytoplasmic 2;Actin, cytoplasmic 2, N-terminally processed	ACTG1	-	-	-	YES	-1.09321	6.16422e-05	35.5478	35.6216	35.4349	34.2409	34.3499	34.7339
Q92841-1;Q92841-3;Q92841-2;Q92841;O15523-2;O15523	Q92841-1;Q92841-3;Q92841-2;Q92841	Probable ATP-dependent RNA helicase DDX17	DDX17	-	-	-	-	-1.12834	0.00197397	25.7115	26.7111	25.7578	25.1141	25.0219	24.6594
P62491-2;Q15907-2;P62491;Q15907;P57735	P62491-2;Q15907-2;P62491;Q15907	Ras-related protein Rab-11A;Ras-related protein Rab-11B	RAB11A;RAB11B	-	-	-	-	-1.12884	0.0586447	26.8701	25.6608	25.2294	23.3967	25.4931	25.484
P22626	P22626	Heterogeneous nuclear ribonucleoproteins A2/B1	HNRNPA2B1	-	-	-	YES	-1.13743	0.00170875	31.2998	31.8846	31.1361	30.1021	30.338	30.4681
O43399;O43399-5;O43399-7;O43399-2;O43399-4;O43399-3;O43399-6	O43399;O43399-5;O43399-7;O43399-2;O43399-4;O43399-3;O43399-6	Tumor protein D54	TPD52L2	-	-	-	-	-1.13778	0.00514158	28.2365	27.8815	27.3166	26.8638	26.8831	26.2744
P11586;Q6UB35	P11586	C-1-tetrahydrofolate synthase, cytoplasmic;Methylenetetrahydrofolate dehydrogenase;Methenyltetrahydrofolate cyclohydrolase;Formyltetrahydrofolate synthetase;C-1-tetrahydrofolate synthase, cytoplasmic, N-terminally processed	MTHFD1	-	-	-	YES	-1.13855	0.0113648	27.2328	27.1768	25.9692	25.9062	25.7092	25.3478
P49006	P49006	MARCKS-related protein	MARCKSL1	-	-	-	YES	-1.14438	0.010903	25.2929	25.5331	25.5761	24.5741	24.936	23.4588
P14618;P14618-2;P14618-3;P30613-2;P30613	P14618;P14618-2;P14618-3	Pyruvate kinase PKM	PKM	-	-	-	YES	-1.15801	0.000509939	33.1283	32.7253	32.1987	31.7381	31.5519	31.2883
Q15185-4;Q15185;Q15185-3;Q15185-2	Q15185-4;Q15185;Q15185-3	Prostaglandin E synthase 3	PTGES3	-	-	-	-	-1.16073	0.0423774	30.0734	28.7815	28.0124	28.2825	27.7808	27.3219
Q99497	Q99497	Protein deglycase DJ-1	PARK7	-	-	-	YES	-1.16094	0.000871364	29.5645	29.3633	28.8334	28.0138	27.9938	28.2709
Q9H0U4;P62820;P62820-3;P62820-2;Q92928;Q92930;P61006-2;P61006	Q9H0U4;P62820	Ras-related protein Rab-1B;Ras-related protein Rab-1A	RAB1B;RAB1A	-	-	-	-	-1.17243	8.19836e-05	26.7384	27.0397	26.9497	25.8446	25.8304	25.5355
P06576	P06576	ATP synthase subunit beta, mitochondrial	ATP5B	-	-	-	-	-1.19099	0.00112539	29.5451	30.3656	29.2899	28.4181	28.5738	28.6357
Q00839-2;Q00839	Q00839-2;Q00839	Heterogeneous nuclear ribonucleoprotein U	HNRNPU	-	-	-	-	-1.22466	0.00154007	28.1448	28.7078	27.8897	26.9001	27.2135	26.9547
P51991-2;P51991	P51991-2;P51991	Heterogeneous nuclear ribonucleoprotein A3	HNRNPA3	-	-	-	-	-1.23052	0.000901214	27.9948	28.8231	27.4605	26.9066	26.9498	26.7305
P49588;P49588-2	P49588;P49588-2	Alanine--tRNA ligase, cytoplasmic	AARS	-	-	-	YES	-1.2521	0.00229388	28.2759	28.5942	27.3289	26.9956	26.826	26.621
P46940	P46940	Ras GTPase-activating-like protein IQGAP1	IQGAP1	-	-	-	YES	-1.26667	0.000506836	29.4112	28.9746	28.5003	27.9606	27.7358	27.3898
O75347;O75347-2	O75347;O75347-2	Tubulin-specific chaperone A	TBCA	-	-	-	-	-1.26806	0.000320778	29.4285	29.7115	29.553	28.0288	28.4441	28.4159
P30086	P30086	Phosphatidylethanolamine-binding protein 1;Hippocampal cholinergic neurostimulating peptide	PEBP1	-	-	-	YES	-1.27177	0.00186057	28.7193	28.6218	27.6735	27.2224	27.1218	26.8552
P52565;P52565-2	P52565;P52565-2	Rho GDP-dissociation inhibitor 1	ARHGDIA	-	-	-	YES	-1.27616	0.021305	28.6792	28.9962	28.8046	26.0517	28.0446	28.5552
O00151	O00151	PDZ and LIM domain protein 1	PDLIM1	-	-	-	-	-1.27865	0.0224117	27.3171	27.4606	26.1318	26.7312	25.9872	24.3551
Q9BV57;Q9BV57-2	Q9BV57;Q9BV57-2	1,2-dihydroxy-3-keto-5-methylthiopentene dioxygenase	ADI1	-	-	-	-	-1.30398	0.00271348	26.2442	26.4885	26.929	25.4426	25.0781	25.229
P60866;P60866-2	P60866;P60866-2	40S ribosomal protein S20	RPS20	-	-	-	YES	-1.30966	0.0137627	25.9624	26.4173	25.1895	23.9695	25.0379	24.6328
P10809;P10809-2	P10809	60 kDa heat shock protein, mitochondrial	HSPD1	-	-	-	YES	-1.32479	0.000290687	30.7649	30.5041	29.5523	28.8805	28.8538	29.1126
P22314-2;P22314	P22314-2;P22314	Ubiquitin-like modifier-activating enzyme 1	UBA1	-	-	-	YES	-1.32556	0.000162044	29.6545	29.7767	29.0074	28.2821	28.374	27.8058
Q86U42-2;Q86U42;Q92843-2	Q86U42-2;Q86U42;Q92843-2	Polyadenylate-binding protein 2	PABPN1	-	-	-	-	-1.38154	0.00500179	25.0556	26.3622	25.3969	23.8075	24.4768	24.3857
P26599;P26599-2;P26599-3	P26599;P26599-2;P26599-3	Polypyrimidine tract-binding protein 1	PTBP1	-	-	-	YES	-1.38351	0.0636763	27.2884	27.3592	24.5827	24.8953	25.5834	24.6011
Q14566	Q14566	DNA replication licensing factor MCM6	MCM6	-	-	-	-	-1.38423	0.00857688	28.1011	28.219	26.1055	26.3797	25.8977	25.9955
Q01105-2;Q01105-3;Q01105-4;P0DME0	Q01105-2;Q01105-3;Q01105-4;P0DME0	Protein SET;Protein SETSIP	SET;SETSIP	-	-	-	-	-1.39225	0.000103799	30.7117	30.4487	30.5811	29.1214	28.9678	29.4755
P20700	P20700	Lamin-B1	LMNB1	-	-	-	-	-1.42798	0.000138093	28.9588	29.3684	28.3997	27.4888	27.6237	27.3305
O00170	O00170	AH receptor-interacting protein	AIP	-	-	-	-	-1.43397	0.00112804	26.4367	26.4287	25.3727	24.6855	24.5721	24.6786
P33993;P33993-3;P33993-2	P33993;P33993-3;P33993-2	DNA replication licensing factor MCM7	MCM7	-	-	-	-	-1.4624	0.010681	25.7256	25.6241	23.846	23.7888	23.2177	23.8021
Q9UJU6;Q9UJU6-5	Q9UJU6;Q9UJU6-5	Drebrin-like protein	DBNL	-	-	-	YES	-1.48627	7.68011e-05	27.8397	28.0992	27.1279	26.1476	26.3572	26.1033
P25205;P25205-2	P25205;P25205-2	DNA replication licensing factor MCM3	MCM3	-	-	-	-	-1.49264	0.213563	32.4346	32.4115	31.1522	30.6936	30.4428	30.3839
P52272-2;P52272	P52272-2;P52272	Heterogeneous nuclear ribonucleoprotein M	HNRNPM	-	-	-	YES	-1.49552	0.00716179	29.3657	29.7917	28.2418	27.7345	27.9363	27.2418
Q9UHD8-7;Q9UHD8-2;Q9UHD8-5;Q9UHD8;Q9UHD8-3;Q9UHD8-4;Q9UHD8-9;Q9UHD8-8	Q9UHD8-7;Q9UHD8-2;Q9UHD8-5;Q9UHD8;Q9UHD8-3;Q9UHD8-4;Q9UHD8-9;Q9UHD8-8	Septin-9	SEPT9	-	-	-	-	-1.52976	0.00840694	26.6777	26.9884	24.7449	24.675	24.8976	24.2492
P15170-2;P15170-3;P15170;Q8IYD1	P15170-2;P15170-3;P15170;Q8IYD1	Eukaryotic peptide chain release factor GTP-binding subunit ERF3A;Eukaryotic peptide chain release factor GTP-binding subunit ERF3B	GSPT1;GSPT2	-	-	-	-	-1.53321	0.0331383	26.147	27.4888	26.5395	24.0014	25.6984	25.8759
P02452;CON__Q862S4	P02452	Collagen alpha-1(I) chain	COL1A1	YES	Core matrisome	Collagens	-	-1.60036	0.0206795	26.5233	25.4843	27.5519	25.0289	24.9809	24.7486
P35241;P35241-5;P35241-4;P35241-2;P35241-3	P35241;P35241-5;P35241-4	Radixin	RDX	-	-	-	YES	-1.61093	0.0269608	27.223	27.5211	25.8534	26.1053	25.3744	24.2849
P23528	P23528	Cofilin-1	CFL1	-	-	-	YES	-1.61627	7.08183e-06	32.7395	32.6436	32.3727	30.9337	31.0992	30.874
P43487-2;P43487	P43487-2;P43487	Ran-specific GTPase-activating protein	RANBP1	-	-	-	-	-1.66675	0.11146	28.3699	28.318	27.075	23.7306	27.1593	27.8727
Q13404;Q13404-7;Q13404-1;Q13404-2;Q13404-8;Q13404-6	Q13404;Q13404-7;Q13404-1;Q13404-2;Q13404-8;Q13404-6	Ubiquitin-conjugating enzyme E2 variant 1	UBE2V1	-	-	-	YES	-1.70579	0.00548472	28.3444	29.2387	26.4484	26.3361	25.9585	26.6195
P40926;P40926-2	P40926;P40926-2	Malate dehydrogenase, mitochondrial	MDH2	-	-	-	YES	-1.71296	1.68895e-05	29.9276	29.8347	28.9655	27.9601	27.8298	27.799
P60174-1;P60174;P60174-4	P60174-1;P60174;P60174-4	Triosephosphate isomerase	TPI1	-	-	-	YES	-1.75076	1.9556e-06	31.8367	31.8907	31.8432	30.1121	30.1058	30.1005
Q92769-3;Q92769;Q13547;O15379;O15379-2	Q92769-3;Q92769;Q13547	Histone deacetylase 2;Histone deacetylase 1	HDAC2;HDAC1	-	-	-	-	-1.77852	0.00314065	26.9399	26.6602	25.9476	23.6327	25.0706	25.5088
P07910-2;P07910-4;P07910;P07910-3;P0DMR1;O60812;B7ZW38;B2RXH8	P07910-2;P07910-4;P07910;P07910-3	Heterogeneous nuclear ribonucleoproteins C1/C2	HNRNPC	-	-	-	YES	-1.78806	0.00080177	29.9354	29.1813	29.6651	27.9913	28.0556	27.3707
Q14247-3;Q14247;Q14247-2	Q14247-3;Q14247;Q14247-2	Src substrate cortactin	CTTN	-	-	-	-	-1.80535	0.0305744	28.0261	28.0935	27.9563	26.1402	26.2076	26.312
P29401;P29401-2	P29401;P29401-2	Transketolase	TKT	-	-	-	YES	-1.8137	7.27129e-06	31.4252	30.8493	30.8733	29.3925	29.2291	29.0851
Q86X29-6;Q86X29-5;Q86X29-4;Q86X29;Q86X29-3;Q86X29-2	Q86X29-6;Q86X29-5;Q86X29-4;Q86X29;Q86X29-3;Q86X29-2	Lipolysis-stimulated lipoprotein receptor	LSR	-	-	-	YES	-1.83327	1.53681e-05	27.6542	28.5026	27.8659	26.0848	26.1664	26.2716
P78406	P78406	mRNA export factor	RAE1	-	-	-	-	-1.84241	0.00496018	27.2039	27.2971	25.5781	24.5465	24.9885	25.0168
P30044-2;P30044-3;P30044;P30044-4	P30044-2;P30044-3;P30044;P30044-4	Peroxiredoxin-5, mitochondrial	PRDX5	-	-	-	YES	-1.89293	0.00493025	28.3052	27.966	25.6453	25.8608	25.5923	24.7846
Q96AE4;Q96AE4-2;Q96I24-2	Q96AE4;Q96AE4-2	Far upstream element-binding protein 1	FUBP1	-	-	-	-	-1.95052	0.000800464	29.144	29.2028	27.4036	26.5239	27.0267	26.3483
Q9NY33;Q9NY33-4;Q9NY33-2	Q9NY33;Q9NY33-4	Dipeptidyl peptidase 3	DPP3	-	-	-	YES	-2.00609	1.96066e-07	29.2995	28.9924	29.3923	27.3339	27.2033	27.1288
Q04837	Q04837	Single-stranded DNA-binding protein, mitochondrial	SSBP1	-	-	-	YES	-2.00712	0.0202234	27.3473	27.6295	26.545	26	25.4147	24.0858
P22392-2;P22392;O60361	P22392-2;P22392;O60361	Nucleoside diphosphate kinase B;Putative nucleoside diphosphate kinase	NME2;NME2P1	-	-	-	-	-2.00758	9.62763e-05	32.0954	31.9499	30.3777	29.541	29.4705	29.3887
P47224	P47224	Guanine nucleotide exchange factor MSS4	RABIF	-	-	-	-	-2.03728	3.48456e-05	25.9994	26.509	26.2736	24.5153	24.0392	24.1158
P52209-2;P52209	P52209-2;P52209	6-phosphogluconate dehydrogenase, decarboxylating	PGD	-	-	-	YES	-2.12949	0.00141154	27.5676	27.4273	28.3095	26.2435	25.2762	25.3963
Q99584	Q99584	Protein S100-A13	S100A13	YES	Matrisome-associated	Secreted Factors	-	-2.18866	0.000455137	27.9	28.6336	26.9094	24.9734	25.686	26.2176
P13798	P13798	Acylamino-acid-releasing enzyme	APEH	-	-	-	YES	-2.19558	0.000594106	26.8169	26.9048	27.1235	25.3683	24.263	24.6272
P62826	P62826	GTP-binding nuclear protein Ran	RAN	-	-	-	YES	-2.20962	0.000681753	27.5384	27.6522	26.5655	23.9346	26.2192	24.9734
P0DMV9;P0DMV8;P0DMV8-2	P0DMV9;P0DMV8;P0DMV8-2	Heat shock 70 kDa protein 1B;Heat shock 70 kDa protein 1A	HSPA1B;HSPA1A	-	-	-	-	-2.25605	5.47264e-08	31.4207	31.1804	30.942	29.0446	28.8127	28.9177
Q9HD42	Q9HD42	Charged multivesicular body protein 1a	CHMP1A	-	-	-	YES	-2.28499	0.00034697	26.7054	27.3399	24.8866	23.9551	24.1022	24.0197
Q15370;Q15370-2	Q15370;Q15370-2	Transcription elongation factor B polypeptide 2	TCEB2	-	-	-	-	-2.39617	0.000229091	28.2976	27.7241	27.3639	26.076	25.6274	24.4937
Q15459-2;Q15459	Q15459-2;Q15459	Splicing factor 3A subunit 1	SF3A1	-	-	-	-	-2.43367	0.000803365	27.655	27.2866	25.2587	23.9307	24.1999	24.7687
Q02790	Q02790	Peptidyl-prolyl cis-trans isomerase FKBP4;Peptidyl-prolyl cis-trans isomerase FKBP4, N-terminally processed	FKBP4	-	-	-	YES	-2.49322	1.54997e-08	30.4512	30.7325	30.4098	28.0121	28.096	28.0058
Q9BR76;A9Z1Z3-3;A9Z1Z3	Q9BR76	Coronin-1B	CORO1B	-	-	-	YES	-2.55638	5.93788e-08	29.8217	29.5684	29.2063	27.0017	26.8601	27.0654
P09972	P09972	Fructose-bisphosphate aldolase C	ALDOC	-	-	-	YES	-2.57744	2.0488e-05	27.7985	28.2074	26.8163	24.6127	25.1886	25.2885
P11413;P11413-2;P11413-3	P11413;P11413-2;P11413-3	Glucose-6-phosphate 1-dehydrogenase	G6PD	-	-	-	YES	-2.58145	4.6247e-07	30.2119	30.258	29.7419	27.9128	27.6273	26.9274
P04075;P04075-2	P04075;P04075-2	Fructose-bisphosphate aldolase A	ALDOA	-	-	-	YES	-2.59956	1.36671e-07	33.2685	33.3783	33.1255	30.5596	30.56	30.854
Q99879;Q99877;Q93079;Q5QNW6;P62807;P58876;P57053;O60814;Q5QNW6-2;Q99880;Q16778;P33778;P23527;P06899;Q8N257;Q96A08	Q99879;Q99877;Q93079;Q5QNW6;P62807;P58876;P57053;O60814;Q5QNW6-2;Q99880;Q16778;P33778;P23527;P06899	Histone H2B type 1-M;Histone H2B type 1-N;Histone H2B type 1-H;Histone H2B type 2-F;Histone H2B type 1-C/E/F/G/I;Histone H2B type 1-D;Histone H2B type F-S;Histone H2B type 1-K;Histone H2B type 1-L;Histone H2B type 2-E;Histone H2B type 1-B;Histone H2B type 1-O;Histone H2B type 1-J	HIST1H2BM;HIST1H2BN;HIST1H2BH;HIST2H2BF;HIST1H2BC;HIST1H2BD;H2BFS;HIST1H2BK;HIST1H2BL;HIST2H2BE;HIST1H2BB;HIST1H2BO;HIST1H2BJ	-	-	-	-	-2.60387	0.000262271	31.318	31.0764	28.7489	27.2861	28.1683	27.8772
P07741;P07741-2	P07741;P07741-2	Adenine phosphoribosyltransferase	APRT	-	-	-	YES	-2.67956	0.000252168	27.9789	27.882	25.2729	24.5374	24.4874	24.0702
P06396-2;P06396-4;P06396-3;P06396	P06396-2;P06396-4;P06396-3;P06396	Gelsolin	GSN	-	-	-	YES	-2.72986	1.68516e-05	30.4562	30.54	30.9808	27.5004	27.5938	28.6932
P24666;P24666-4;P24666-3;P24666-2	P24666;P24666-4;P24666-3;P24666-2	Low molecular weight phosphotyrosine protein phosphatase	ACP1	-	-	-	YES	-2.75912	9.45991e-06	27.1279	27.9193	25.97	24.2615	24.2391	24.2391
P04080	P04080	Cystatin-B	CSTB	YES	Matrisome-associated	ECM Regulators	YES	-2.86698	2.13393e-05	27.8466	27.5662	26.6883	23.2008	25.3614	24.938
Q13263;Q13263-2	Q13263;Q13263-2	Transcription intermediary factor 1-beta	TRIM28	-	-	-	-	-3.10291	2.24836e-08	30.4957	30.4128	29.5551	27.2133	27.0813	26.8603
O00764;O00764-3;O00764-2	O00764;O00764-3;O00764-2	Pyridoxal kinase	PDXK	-	-	-	YES	-3.12869	4.73318e-06	28.1369	28.1029	26.5242	24.0539	24.9256	24.3983
P17931	P17931	Galectin-3	LGALS3	YES	Matrisome-associated	ECM-affiliated Proteins	YES	-3.17508	1.97214e-05	28.1211	29.9157	28.3143	26.076	25.4377	25.3122
O14745;O14745-2	O14745;O14745-2	Na(+)/H(+) exchange regulatory cofactor NHE-RF1	SLC9A3R1	-	-	-	YES	-3.2292	4.69415e-07	30.2316	30.2529	28.7203	26.2641	26.5373	26.7159
P05386	P05386	60S acidic ribosomal protein P1	RPLP1	-	-	-	-	-3.31441	0.0204368	29.7355	29.2227	28.8587	24.2592	27.8491	25.7654
P00390-5;P00390-4;P00390-2;P00390-3;P00390	P00390-5;P00390-4;P00390-2;P00390-3;P00390	Glutathione reductase, mitochondrial	GSR	-	-	-	YES	-3.35581	9.80818e-08	27.7226	27.5376	26.8446	23.872	24.43	23.7354
O75874	O75874	Isocitrate dehydrogenase [NADP] cytoplasmic	IDH1	-	-	-	YES	-3.42059	0.000448978	29.137	28.7179	25.5858	24.458	25.2064	23.5146
P45973	P45973	Chromobox protein homolog 5	CBX5	-	-	-	-	-3.62618	5.99778e-09	28.1717	28.0009	27.5023	24.0059	23.9761	24.8146
P68133;P68032;P63267;P62736	P68133;P68032;P63267;P62736	Actin, alpha skeletal muscle;Actin, alpha cardiac muscle 1;Actin, gamma-enteric smooth muscle;Actin, aortic smooth muscle	ACTA1;ACTC1;ACTG2;ACTA2	-	-	-	-	-3.64399	0.0106553	31.7983	31.5719	32.4088	27.9201	28.2463	28.6806
P05783;CON__H-INV:HIT000015463	P05783	Keratin, type I cytoskeletal 18	KRT18	-	-	-	YES	-4.9361	7.83762e-10	35.5964	36.1197	34.457	30.2713	30.6125	30.481
P04792	P04792	Heat shock protein beta-1	HSPB1	-	-	-	YES	-5.99734	1.02439e-07	33.1772	33.0277	30.663	26.9108	25.9403	26.0248

## Sheet: Supplementary Table 1b
Supplementary Table 1 - Mass spectrometry-based proteomic analysis of breast cancer cell secretomes
MDA-Bone vs MDA-WT
										LFQ intensity
										MDA-Bone			MDA-WT
Protein IDs	Majority protein IDs	Protein names	Gene names	Matrisome	Division	Category	Exosome	log2(MDA-Bone/MDA-WT)	p value (MDA-Bone vs MDA-WT)	R1	R2	R3	R1	R2	R3
Q13765;E9PAV3-2;E9PAV3;Q9BZK3	Q13765;E9PAV3-2;E9PAV3	Nascent polypeptide-associated complex subunit alpha;Nascent polypeptide-associated complex subunit alpha, muscle-specific form	NACA	-	-	-	-	-0.416657	0.112441	27.8906	27.4964	28.0666	28.5057	28.0875	28.1104
O00115-2;O00115	O00115-2;O00115	Deoxyribonuclease-2-alpha	DNASE2	-	-	-	YES	-0.16999	0.579311	27.6426	28.6812	27.394	28.0832	28.2934	27.8511
O00151	O00151	PDZ and LIM domain protein 1	PDLIM1	-	-	-	-	0.969273	0.0716327	26.8309	26.3649	26.7856	26.7312	25.9872	24.3551
O00170	O00170	AH receptor-interacting protein	AIP	-	-	-	-	0.444703	0.222442	24.8582	25.4292	24.9829	24.6855	24.5721	24.6786
O00231;O00231-2	O00231;O00231-2	26S proteasome non-ATPase regulatory subunit 11	PSMD11	-	-	-	-	0.12941	0.644444	26.1701	26.5242	26.5799	26.2897	26.4716	26.1246
O00233;O00233-2;O00233-3	O00233;O00233-2	26S proteasome non-ATPase regulatory subunit 9	PSMD9	-	-	-	-	-0.14532	0.710333	24.2791	24.982	25.0103	25.492	23.8861	25.3292
O00299	O00299	Chloride intracellular channel protein 1	CLIC1	-	-	-	YES	0.330687	0.221153	30.368	30.9384	30.2001	30.1976	30.2528	30.0639
O00303	O00303	Eukaryotic translation initiation factor 3 subunit F	EIF3F	-	-	-	-	-0.0457167	0.909981	27.6198	26.3458	28.0059	27.6613	27.4689	26.9785
O00391;O00391-2;Q8WWX9	O00391;O00391-2	Sulfhydryl oxidase 1	QSOX1	-	-	-	YES	-1.08717	0.000156497	33.3009	32.8484	33.1624	34.2502	34.2437	34.0793
O00410;O00410-3;O00410-2;O60518	O00410;O00410-3;O00410-2	Importin-5	IPO5	-	-	-	-	-0.330197	0.489948	29.1838	27.731	29.491	29.9258	29.0428	28.4278
O00468-6;O00468-3;O00468-7;O00468-5;O00468-4;O00468;O00468-2	O00468-6;O00468-3;O00468-7;O00468-5;O00468-4;O00468;O00468-2	Agrin;Agrin N-terminal 110 kDa subunit;Agrin C-terminal 110 kDa subunit;Agrin C-terminal 90 kDa fragment;Agrin C-terminal 22 kDa fragment	AGRN	YES	Core matrisome	ECM Glycoproteins	YES	0.29415	0.263546	30.2627	30.0309	30.1404	29.983	29.8852	29.6833
O00487	O00487	26S proteasome non-ATPase regulatory subunit 14	PSMD14	-	-	-	-	0.841883	0.123117	26.4374	26.3421	25.1691	26.0765	25.416	23.9304
O00560;O00560-3;O00560-2	O00560;O00560-3;O00560-2	Syntenin-1	SDCBP	-	-	-	YES	-0.474717	0.144424	26.3128	26.5083	25.735	26.7748	26.9221	26.2833
O00584;O00584-2;Q07343-4;Q07343-2;Q07343-3;Q07343	O00584	Ribonuclease T2	RNASET2	-	-	-	YES	0.17086	0.552305	27.6328	27.6911	27.729	27.5635	27.4949	27.482
O00764;O00764-3;O00764-2	O00764;O00764-3;O00764-2	Pyridoxal kinase	PDXK	-	-	-	YES	1.22509	0.0126173	24.946	26.1274	25.9796	24.0539	24.9256	24.3983
O14579;O14579-2;O14579-3	O14579;O14579-2;O14579-3	Coatomer subunit epsilon	COPE	-	-	-	-	0.146573	0.680507	27.1898	26.2402	26.9036	26.9493	26.6165	26.3281
O14737;O14737-2	O14737;O14737-2	Programmed cell death protein 5	PDCD5	-	-	-	YES	0.676887	0.0221781	27.3686	27.893	27.6366	27.003	27.1441	26.7204
O14744-5;O14744;O14744-3;O14744-2;O14744-4	O14744-5;O14744;O14744-3;O14744-2;O14744-4	Protein arginine N-methyltransferase 5;Protein arginine N-methyltransferase 5, N-terminally processed	PRMT5	-	-	-	-	-0.934877	0.0909314	25.501	23.2731	25.3255	25.8213	25.9104	25.1725
O14745;O14745-2	O14745;O14745-2	Na(+)/H(+) exchange regulatory cofactor NHE-RF1	SLC9A3R1	-	-	-	YES	-0.0171867	0.962391	26.422	26.378	26.6657	26.2641	26.5373	26.7159
O14786-3;O14786-2;O14786	O14786-3;O14786-2;O14786	Neuropilin-1	NRP1	-	-	-	-	-0.55374	0.0211851	28.1961	27.8359	28.4845	28.8249	28.6197	28.7331
O14818;O14818-2;O14818-4;Q8TAA3-2;Q8TAA3-5;Q8TAA3	O14818;O14818-2	Proteasome subunit alpha type-7	PSMA7	-	-	-	YES	0.184147	0.473336	27.9277	28.5281	28.1038	28.3628	27.9191	27.7252
O14974-5;O14974-4;O14974-3;O14974;O14974-2	O14974-5;O14974-4;O14974-3;O14974;O14974-2	Protein phosphatase 1 regulatory subunit 12A	PPP1R12A	-	-	-	-	-0.435527	0.145352	25.5002	25.5862	25.5899	25.9585	26.1308	25.8936
O14979-3;O14979-2;O14979	O14979-3;O14979-2;O14979	Heterogeneous nuclear ribonucleoprotein D-like	HNRNPDL	-	-	-	-	-0.143677	0.820552	26.2871	26.5463	26.092	26.7056	26.4201	26.2307
O15067	O15067	Phosphoribosylformylglycinamidine synthase	PFAS	-	-	-	YES	-0.59543	0.454697	27.3815	23.7469	27.5051	26.8499	26.8902	26.6798
O15160-2;O15160	O15160-2;O15160	DNA-directed RNA polymerases I and III subunit RPAC1	POLR1C	-	-	-	-	0.571597	0.15741	25.5606	26.1356	25.6889	25.2391	25.2984	25.1328
O15212	O15212	Prefoldin subunit 6	PFDN6	-	-	-	-	-0.47654	0.177134	25.3432	25.8531	26.1331	26.3911	26.257	26.1109
O15230;O15230-2;Q16787-3;Q16787	O15230	Laminin subunit alpha-5	LAMA5	YES	Core matrisome	ECM Glycoproteins	YES	1.00019	0.00485638	30.3613	29.4406	29.3997	28.9116	28.9611	28.3283
O15231;O15231-3;O15231-6;O15231-5;O15231-4;O15231-7;O15231-8;O15231-2;O15231-9	O15231;O15231-3;O15231-6;O15231-5;O15231-4;O15231-7;O15231-8;O15231-2	Zinc finger protein 185	ZNF185	-	-	-	-	-0.276537	0.354295	25.9947	26.1155	26.0331	26.038	26.3609	26.574
O15355	O15355	Protein phosphatase 1G	PPM1G	-	-	-	-	-0.03367	0.872024	27.7786	28.0478	28.1511	28.1132	27.9586	28.0066
O43390-4;O43390;O43390-2;O43390-3	O43390-4;O43390;O43390-2;O43390-3	Heterogeneous nuclear ribonucleoprotein R	HNRNPR	-	-	-	-	0.10382	0.626555	25.2469	25.4237	25.7389	25.2405	25.4992	25.3584
O43396	O43396	Thioredoxin-like protein 1	TXNL1	-	-	-	-	0.0446167	0.830243	26.4516	26.7432	26.6772	26.6417	26.4333	26.6632
O43399;O43399-5;O43399-7;O43399-2;O43399-4;O43399-3;O43399-6	O43399;O43399-5;O43399-7;O43399-2;O43399-4;O43399-3;O43399-6	Tumor protein D54	TPD52L2	-	-	-	-	0.6884	0.0637952	27.0312	27.9193	27.136	26.8638	26.8831	26.2744
O43491-4;O43491;O43491-2;O43491-3	O43491-4;O43491;O43491-2;O43491-3	Band 4.1-like protein 2	EPB41L2	-	-	-	YES	-0.88375	0.012005	24.0607	24.0431	23.9518	24.7109	25.0822	24.9138
O43493-4;O43493-2;O43493-5;O43493-3;O43493;O43493-6	O43493-4;O43493-2;O43493-5;O43493-3;O43493	Trans-Golgi network integral membrane protein 2	TGOLN2	-	-	-	-	0.284553	0.545118	25.6772	26.4487	27.0444	25.3658	26.7179	26.2329
O43681	O43681	ATPase ASNA1	ASNA1	-	-	-	YES	-0.588253	0.201583	25.4246	25.436	25.1027	26.2628	25.9552	25.5101
O43684-2;O43684	O43684-2;O43684	Mitotic checkpoint protein BUB3	BUB3	-	-	-	-	-0.425043	0.508986	25.8985	23.7574	25.3897	25.3882	25.6394	25.2931
O43707;O43707-2;O43707-3;Q9H254-2;Q9H254-4;Q9H254	O43707;O43707-2;O43707-3	Alpha-actinin-4	ACTN4	-	-	-	YES	0.14395	0.462727	32.399	32.5917	32.5641	32.4294	32.2924	32.4011
O43852;O43852-3;O43852-6;O43852-2;O43852-4;O43852-5;O43852-15;O43852-10;O43852-9;O43852-13;O43852-14;O43852-11;O43852-8;O43852-12;O43852-7	O43852;O43852-3;O43852-6;O43852-2;O43852-4;O43852-5;O43852-15;O43852-10	Calumenin	CALU	-	-	-	-	0.391787	0.20017	29.8605	29.4819	29.9772	29.3807	29.1337	29.6297
O60506-4;O60506-3;O60506-2;O60506;O60506-5	O60506-4;O60506-3;O60506-2;O60506;O60506-5	Heterogeneous nuclear ribonucleoprotein Q	SYNCRIP	-	-	-	-	0.0217333	0.961682	26.7677	27.5388	26.6889	27.29	27.1826	26.4575
O60568	O60568	Procollagen-lysine,2-oxoglutarate 5-dioxygenase 3	PLOD3	YES	Matrisome-associated	ECM Regulators	YES	2.14071	1.21748e-06	29.6478	28.8288	29.3473	27.2276	27.2474	26.9268
Q99879;Q99877;Q93079;Q5QNW6;P62807;P58876;P57053;O60814;Q5QNW6-2;Q99880;Q16778;P33778;P23527;P06899;Q8N257;Q96A08	Q99879;Q99877;Q93079;Q5QNW6;P62807;P58876;P57053;O60814;Q5QNW6-2;Q99880;Q16778;P33778;P23527;P06899	Histone H2B type 1-M;Histone H2B type 1-N;Histone H2B type 1-H;Histone H2B type 2-F;Histone H2B type 1-C/E/F/G/I;Histone H2B type 1-D;Histone H2B type F-S;Histone H2B type 1-K;Histone H2B type 1-L;Histone H2B type 2-E;Histone H2B type 1-B;Histone H2B type 1-O;Histone H2B type 1-J	HIST1H2BM;HIST1H2BN;HIST1H2BH;HIST2H2BF;HIST1H2BC;HIST1H2BD;H2BFS;HIST1H2BK;HIST1H2BL;HIST2H2BE;HIST1H2BB;HIST1H2BO;HIST1H2BJ	-	-	-	-	1.4643	0.0158244	29.2044	29.201	29.3192	27.2861	28.1683	27.8772
O60888-3;O60888;O60888-2	O60888-3;O60888;O60888-2	Protein CutA	CUTA	-	-	-	YES	0.0133633	0.956764	29.5545	29.7721	29.7294	29.6713	29.6518	29.6928
O75083;O75083-3	O75083;O75083-3	WD repeat-containing protein 1	WDR1	-	-	-	YES	0.4171	0.0904126	29.4331	29.7164	29.6659	29.3222	29.1964	29.0456
O75223;O75223-3;O75223-2;O75223-4	O75223;O75223-3;O75223-2;O75223-4	Gamma-glutamylcyclotransferase	GGCT	-	-	-	YES	-0.731373	0.0327469	25.774	26.4701	26.033	26.3229	27.5909	26.5575
O75312	O75312	Zinc finger protein ZPR1	ZPR1	-	-	-	-	0.34983	0.275287	26.0902	25.1882	26.4725	25.5978	25.7141	25.3895
O75347;O75347-2	O75347;O75347-2	Tubulin-specific chaperone A	TBCA	-	-	-	-	0.636377	0.0310732	28.4768	29.3481	28.973	28.0288	28.4441	28.4159
O75369-8	O75369-8	Filamin-B	FLNB	-	-	-	YES	0.828853	0.00224617	31.0961	31.4237	30.9285	30.448	30.2613	30.2526
O75506	O75506	Heat shock factor-binding protein 1	HSBP1	-	-	-	-	-0.0707967	0.850619	25.1711	25.625	26.4032	26.0854	25.6752	25.6511
O75531	O75531	Barrier-to-autointegration factor;Barrier-to-autointegration factor, N-terminally processed	BANF1	-	-	-	-	-0.853993	0.226774	26.4619	23.9229	26.8697	26.8569	26.4182	26.5415
O75534-2;O75534;O75534-3;O75534-4	O75534-2;O75534;O75534-3;O75534-4	Cold shock domain-containing protein E1	CSDE1	-	-	-	-	0.179907	0.681264	25.1036	25.8031	25.4698	24.9839	25.5478	25.3051
O75688-4;O75688-2;O75688;O75688-3;P35813-2;O75688-5;P35813;P35813-3	O75688-4;O75688-2;O75688;O75688-3;P35813-2;O75688-5;P35813;P35813-3	Protein phosphatase 1B;Protein phosphatase 1A	PPM1B;PPM1A	-	-	-	-	-0.32534	0.222798	23.9763	23.9633	24.0736	24.2069	24.4433	24.3391
O75821	O75821	Eukaryotic translation initiation factor 3 subunit G	EIF3G	-	-	-	-	0.186593	0.551628	26.1393	27.2529	26.5548	26.3361	26.6889	26.3622
O75822-3;O75822;O75822-2	O75822-3;O75822;O75822-2	Eukaryotic translation initiation factor 3 subunit J	EIF3J	-	-	-	-	-1.36604	0.0808734	25.8739	23.2138	25.9074	26.1714	26.5466	26.3752
O75874	O75874	Isocitrate dehydrogenase [NADP] cytoplasmic	IDH1	-	-	-	YES	-0.689917	0.368201	23.8952	23.9711	23.243	24.458	25.2064	23.5146
O94760;O94760-2	O94760	N(G),N(G)-dimethylarginine dimethylaminohydrolase 1	DDAH1	-	-	-	YES	1.38153	0.00570332	28.3435	29.0167	28.6553	27.0286	27.1476	27.6946
O94907;Q9UBU2	O94907	Dickkopf-related protein 1	DKK1	-	-	-	-	0.218903	0.685658	27.9975	30.484	28.7024	28.0522	28.8428	29.6322
O94985-2	O94985-2	Calsyntenin-1;Soluble Alc-alpha;CTF1-alpha	CLSTN1	-	-	-	-	-0.102273	0.674275	31.4129	32.2029	32.0279	31.904	31.8806	32.1658
O95336	O95336	6-phosphogluconolactonase	PGLS	-	-	-	YES	-0.38924	0.547773	27.255	26.6068	26.6435	27.5139	27.488	26.6712
O95394;O95394-4;O95394-3	O95394;O95394-4;O95394-3	Phosphoacetylglucosamine mutase	PGM3	-	-	-	-	0.825633	0.221648	26.6786	25.8815	26.6951	25.8449	25.3052	25.6281
O95433;O95433-2	O95433;O95433-2	Activator of 90 kDa heat shock protein ATPase homolog 1	AHSA1	-	-	-	YES	0.0391167	0.878591	26.8827	26.1543	26.8864	26.8779	26.4676	26.4605
O95757	O95757	Heat shock 70 kDa protein 4L	HSPA4L	-	-	-	-	-0.24766	0.509663	25.2796	25.0282	25.4246	25.6565	25.6712	25.1477
O95777	O95777	U6 snRNA-associated Sm-like protein LSm8	LSM8	-	-	-	-	0.1975	0.458074	26.5148	25.9711	26.7081	26.3405	26.1283	26.1327
O95817	O95817	BAG family molecular chaperone regulator 3	BAG3	-	-	-	-	0.30069	0.567312	25.5317	25.0332	25.3795	23.9249	25.6473	25.4702
P00338;P00338-3;P00338-5;P00338-2;P00338-4;Q6ZMR3	P00338;P00338-3;P00338-5;P00338-2;P00338-4	L-lactate dehydrogenase A chain	LDHA	-	-	-	YES	-0.86434	0.153686	30.9967	29.6758	30.5417	31.7337	31.3398	30.7337
P00390-5;P00390-4;P00390-2;P00390-3;P00390	P00390-5;P00390-4;P00390-2;P00390-3;P00390	Glutathione reductase, mitochondrial	GSR	-	-	-	YES	0.29805	0.376098	23.9204	24.7522	24.2589	23.872	24.43	23.7354
P00441	P00441	Superoxide dismutase [Cu-Zn]	SOD1	-	-	-	YES	1.66427	0.0263494	27.817	26.2078	27.6778	26.3984	23.5056	26.8057
P00491	P00491	Purine nucleoside phosphorylase	PNP	-	-	-	YES	-0.8637	0.305837	27.7636	26.2775	27.4058	28.4098	28.1571	27.4711
P00492	P00492	Hypoxanthine-guanine phosphoribosyltransferase	HPRT1	-	-	-	YES	-0.633053	0.0805103	27.1678	26.2619	26.967	27.9432	27.3094	27.0432
P00505-2;P00505	P00505-2;P00505	Aspartate aminotransferase, mitochondrial	GOT2	-	-	-	YES	-0.250573	0.580814	27.1698	26.0917	27.0444	27.2415	26.9847	26.8315
P00558;P00558-2;P07205	P00558;P00558-2	Phosphoglycerate kinase 1	PGK1	-	-	-	YES	0.16811	0.539623	30.1376	30.504	30.1502	30.1298	29.9411	30.2166
P01033	P01033	Metalloproteinase inhibitor 1	TIMP1	YES	Matrisome-associated	ECM Regulators	YES	0.933707	0.10443	29.8678	31.7706	28.8386	29.575	29.1918	28.9092
P01040	P01040	Cystatin-A;Cystatin-A, N-terminally processed	CSTA	YES	Matrisome-associated	ECM Regulators	-	-0.263987	0.74093	24.8977	27.792	27.3565	26.3334	27.4403	27.0644
P01892;P10316;P30459;P01891;P10314;P30453;P16190;P16189;P30512;P30457;P30456;P30450;P18462;Q09160	P01892;P10316;P30459;P01891	HLA class I histocompatibility antigen, A-2 alpha chain;HLA class I histocompatibility antigen, A-69 alpha chain;HLA class I histocompatibility antigen, A-74 alpha chain;HLA class I histocompatibility antigen, A-68 alpha chain	HLA-A	-	-	-	-	0.246583	0.679725	30.7831	30.3464	30.863	30.2137	30.3792	30.6598
P02452;CON__Q862S4	P02452	Collagen alpha-1(I) chain	COL1A1	YES	Core matrisome	Collagens	-	0.943437	0.145383	26.0851	26.0023	25.5012	25.0289	24.9809	24.7486
P02545;P02545-6;P02545-3;P02545-5	P02545;P02545-6;P02545-3;P02545-5	Prelamin-A/C;Lamin-A/C	LMNA	-	-	-	-	0.503463	0.0377334	31.5282	32.0713	31.9622	31.2085	31.3188	31.524
P02751-17;P02751-3;P02751;P02751-6;P02751-5;P02751-10;P02751-9;P02751-14;P02751-8;P02751-7;P02751-15;P02751-13;P02751-11;P02751-4;P02751-12;P02751-16;P02751-2	P02751-17;P02751-3;P02751;P02751-6;P02751-5;P02751-10;P02751-9;P02751-14;P02751-8;P02751-7;P02751-15;P02751-13;P02751-11;P02751-4;P02751-12	Fibronectin;Anastellin;Ugl-Y1;Ugl-Y2;Ugl-Y3	FN1	YES	Core matrisome	ECM Glycoproteins	YES	-0.789403	0.0330474	32.05	31.3589	31.0665	32.5015	32.3443	31.9978
P02786	P02786	Transferrin receptor protein 1;Transferrin receptor protein 1, serum form	TFRC	-	-	-	YES	-1.1138	0.192893	27.1969	23.4092	27.0581	27.45	26.8913	26.6642
P02794	P02794	Ferritin heavy chain;Ferritin heavy chain, N-terminally processed	FTH1	-	-	-	YES	-0.322907	0.516466	28.9762	28.2867	29.8243	28.8089	29.3468	29.9002
P03956	P03956	Interstitial collagenase;22 kDa interstitial collagenase;27 kDa interstitial collagenase	MMP1	YES	Matrisome-associated	ECM Regulators	-	-4.78004	8.2716e-06	28.7022	29.6463	27.9423	33.6998	34.2862	32.645
P04040	P04040	Catalase	CAT	-	-	-	YES	-0.134773	0.638826	26.4579	26.3254	26.3823	26.281	26.8575	26.4314
P04075;P04075-2	P04075;P04075-2	Fructose-bisphosphate aldolase A	ALDOA	-	-	-	YES	0.0746267	0.777891	30.3098	30.9941	30.8936	30.5596	30.56	30.854
P04080	P04080	Cystatin-B	CSTB	YES	Matrisome-associated	ECM Regulators	YES	2.14189	0.000342718	26.5346	26.7858	26.6054	23.2008	25.3614	24.938
P04114;REV__Q8IXS0	P04114	Apolipoprotein B-100;Apolipoprotein B-48	APOB	-	-	-	YES	-0.669297	0.302453	26.1723	23.6291	26.2808	26.2385	25.6436	26.208
P04179-4;P04179-2;P04179;P04179-3	P04179-4;P04179-2;P04179;P04179-3	Superoxide dismutase [Mn], mitochondrial	SOD2	-	-	-	YES	0.21177	0.545266	24.7994	24.2884	23.7441	24.0315	23.9363	24.2288
P04406;P04406-2;O14556	P04406;P04406-2	Glyceraldehyde-3-phosphate dehydrogenase	GAPDH	-	-	-	YES	-0.323643	0.171272	29.8376	30.0856	29.9653	30.2939	30.693	29.8724
P04792	P04792	Heat shock protein beta-1	HSPB1	-	-	-	YES	1.94731	0.00519113	28.1931	28.4583	28.0664	26.9108	25.9403	26.0248
P05023-3;P05023-4;P05023;P05023-2;P13637;P13637-2;P13637-3;P50993;Q13733;P20648	P05023-3;P05023-4;P05023;P05023-2	Sodium/potassium-transporting ATPase subunit alpha-1	ATP1A1	-	-	-	YES	-0.239773	0.686811	25.7711	25.234	25.3879	25.8182	25.7971	25.497
P05067-7;P05067-11;P05067-8;P05067-9;P05067;P05067-3;P05067-4;P05067-5;P05067-6;P05067-10;P05067-2	P05067-7;P05067-11;P05067-8;P05067-9;P05067;P05067-3;P05067-4;P05067-5;P05067-6;P05067-10	Amyloid beta A4 protein;N-APP;Soluble APP-alpha;Soluble APP-beta;C99;Beta-amyloid protein 42;Beta-amyloid protein 40;C83;P3(42);P3(40);C80;Gamma-secretase C-terminal fragment 59;Gamma-secretase C-terminal fragment 57;Gamma-secretase C-terminal fragment 50;C31	APP	-	-	-	YES	-0.37668	0.239147	32.0894	33.1122	32.5376	32.5105	33.1066	33.2522
P05121;P05121-2	P05121;P05121-2	Plasminogen activator inhibitor 1	SERPINE1	YES	Matrisome-associated	ECM Regulators	YES	-0.948357	0.107388	32.3805	30.9792	31.7488	33.3395	32.6181	31.9959
P05198	P05198	Eukaryotic translation initiation factor 2 subunit 1	EIF2S1	-	-	-	YES	0.38748	0.126137	27.7782	27.3267	28.1256	27.3085	27.3736	27.386
P05386	P05386	60S acidic ribosomal protein P1	RPLP1	-	-	-	-	2.39877	0.0788322	27.988	29.1445	27.9374	24.2592	27.8491	25.7654
P05387	P05387	60S acidic ribosomal protein P2	RPLP2	-	-	-	YES	-0.01571	0.955022	29.3048	29.7214	29.8305	29.7173	29.4749	29.7117
P05388;P05388-2;Q8NHW5	P05388;P05388-2;Q8NHW5	60S acidic ribosomal protein P0;60S acidic ribosomal protein P0-like	RPLP0;RPLP0P6	-	-	-	-	0.14185	0.657825	26.8429	26.9624	26.4394	27.2097	26.6094	26
P05455	P05455	Lupus La protein	SSB	-	-	-	-	-0.321977	0.390513	25.9572	26.2249	26.3883	26.6694	26.6482	26.2189
P05783;CON__H-INV:HIT000015463	P05783	Keratin, type I cytoskeletal 18	KRT18	-	-	-	YES	0.82989	0.0232702	31.3609	31.2481	31.2454	30.2713	30.6125	30.481
P06280	P06280	Alpha-galactosidase A	GLA	-	-	-	YES	0.03073	0.917772	26.9391	26.4261	26.2327	26.6538	26.8416	26.0104
P06396-2;P06396-4;P06396-3;P06396	P06396-2;P06396-4;P06396-3;P06396	Gelsolin	GSN	-	-	-	YES	1.26509	0.00952195	28.794	29.934	28.8547	27.5004	27.5938	28.6932
P06454-2;P06454	P06454-2;P06454	Prothymosin alpha;Prothymosin alpha, N-terminally processed;Thymosin alpha-1	PTMA	-	-	-	-	-0.199767	0.763781	30.1638	30.7065	30.9764	29.1862	31.3333	31.9265
P06576	P06576	ATP synthase subunit beta, mitochondrial	ATP5B	-	-	-	-	0.380097	0.209889	28.7263	28.8766	29.1649	28.4181	28.5738	28.6357
P06703	P06703	Protein S100-A6	S100A6	YES	Matrisome-associated	Secreted Factors	YES	0.0360133	0.962558	32.7014	30.5713	32.4161	31.4904	31.8259	32.2645
P06733;P06733-2;P13929-3;P13929-2;P13929	P06733;P06733-2	Alpha-enolase	ENO1	-	-	-	YES	-0.100487	0.633178	32.1518	32.4048	32.3203	32.4859	32.3406	32.3519
P06744;P06744-2;CON__Q3ZBD7;Q8N196	P06744;P06744-2	Glucose-6-phosphate isomerase	GPI	-	-	-	YES	-0.1196	0.703637	28.7773	28.0903	28.3345	28.9461	28.472	28.1429
P06748-2;P06748;P06748-3	P06748-2;P06748;P06748-3	Nucleophosmin	NPM1	-	-	-	-	-0.556657	0.0676777	31.0889	31.6693	31.3201	31.8766	31.8291	32.0425
P06753-2;P06753-3;P06753-6;P06753-5;P06753-4;P06753-7	P06753-2;P06753-3;P06753-6;P06753-5;P06753-4	Tropomyosin alpha-3 chain	TPM3	-	-	-	YES	0.319577	0.253367	31.4569	31.7109	32.1408	31.1282	31.3602	31.8615
P06865;P06865-2	P06865	Beta-hexosaminidase subunit alpha	HEXA	-	-	-	YES	0.08164	0.856675	28.6464	26.8958	28.375	28.1503	27.9563	27.5657
P07237	P07237	Protein disulfide-isomerase	P4HB	-	-	-	YES	0.260617	0.259921	30.0819	30.157	30.397	29.9241	29.6571	30.273
P07339	P07339	Cathepsin D;Cathepsin D light chain;Cathepsin D heavy chain	CTSD	YES	Matrisome-associated	ECM Regulators	YES	1.54485	2.8254e-05	31.8478	31.8283	31.4931	30.2431	30.3404	29.951
P07355;P07355-2;A6NMY6	P07355;P07355-2;A6NMY6	Annexin A2;Putative annexin A2-like protein	ANXA2;ANXA2P2	-	-	-	-	-0.24519	0.550436	28.5207	29.038	28.2224	29.3308	29.1806	28.0053
P07437;A6NNZ2	P07437	Tubulin beta chain	TUBB	-	-	-	YES	-0.0736067	0.754041	30.9525	30.9422	30.8304	31.1419	30.9655	30.8385
P07602;P07602-2;P07602-3	P07602;P07602-2;P07602-3	Prosaposin;Saposin-A;Saposin-B-Val;Saposin-B;Saposin-C;Saposin-D	PSAP	-	-	-	YES	0.797657	0.124486	28.6099	29.8702	28.2063	28.3102	28.1091	27.8742
P07686	P07686	Beta-hexosaminidase subunit beta;Beta-hexosaminidase subunit beta chain B;Beta-hexosaminidase subunit beta chain A	HEXB	-	-	-	YES	-0.262393	0.393068	29.6465	28.7224	29.3883	29.6841	29.5472	29.313
P07711	P07711	Cathepsin L1;Cathepsin L1 heavy chain;Cathepsin L1 light chain	CTSL	-	-	-	YES	-0.299487	0.233671	27.5735	28.1985	27.6249	28.0301	27.9323	28.3329
P07737;CON__P02584	P07737	Profilin-1	PFN1	-	-	-	YES	0.552903	0.155261	29.5329	29.9018	29.1946	29.3666	29.1227	28.4814
P07741;P07741-2	P07741;P07741-2	Adenine phosphoribosyltransferase	APRT	-	-	-	YES	0.820253	0.154296	25.0358	24.9516	25.5683	24.5374	24.4874	24.0702
P07900;P07900-2;Q14568;Q58FG0;Q58FG1	P07900;P07900-2	Heat shock protein HSP 90-alpha	HSP90AA1	-	-	-	YES	-0.0977533	0.69177	30.677	30.9797	31.2924	31.0083	30.9939	31.2402
P07910-2;P07910-4;P07910;P07910-3;P0DMR1;O60812;B7ZW38;B2RXH8	P07910-2;P07910-4;P07910;P07910-3	Heterogeneous nuclear ribonucleoproteins C1/C2	HNRNPC	-	-	-	YES	0.27347	0.521291	27.8427	28.9857	27.4096	27.9913	28.0556	27.3707
P07942	P07942	Laminin subunit beta-1	LAMB1	YES	Core matrisome	ECM Glycoproteins	YES	2.50495	2.65303e-05	29.7415	30.5222	29.2545	27.2266	27.2759	27.5009
P07996;P07996-2	P07996;P07996-2	Thrombospondin-1	THBS1	YES	Core matrisome	ECM Glycoproteins	YES	1.29489	3.73802e-05	35.66	35.6035	35.1448	34.2489	34.1773	34.0974
P08123	P08123	Collagen alpha-2(I) chain	COL1A2	YES	Core matrisome	Collagens	YES	0.386543	0.510517	24.7422	25.3979	24.8705	24.7365	23.9366	25.1779
P08133;P08133-2	P08133;P08133-2	Annexin A6	ANXA6	YES	Matrisome-associated	ECM-affiliated Proteins	YES	0.669047	0.0916295	26.4071	26.6948	26.8485	26.0427	26.2602	25.6405
P08195-3;P08195;P08195-4	P08195-3;P08195;P08195-4	4F2 cell-surface antigen heavy chain	SLC3A2	-	-	-	YES	-1.09238	0.141876	27.1939	24.2828	27.7325	27.5359	27.607	27.3435
P08238;Q58FF7;Q92538-3;Q92538-2;Q92538	P08238	Heat shock protein HSP 90-beta	HSP90AB1	-	-	-	YES	-0.155357	0.541528	33.3315	33.1452	33.6107	33.4519	33.4954	33.6062
P08603;P08603-2;Q03591	P08603;P08603-2	Complement factor H	CFH	-	-	-	YES	-3.07405	1.20287e-05	24.8676	24.0516	25.0168	27.5218	27.6375	27.999
P08621-2;P08621;P08621-3;P08621-4	P08621-2;P08621;P08621-3	U1 small nuclear ribonucleoprotein 70 kDa	SNRNP70	-	-	-	-	0.163607	0.729108	26.7768	26.9745	26.2493	26.11	26.8145	26.5853
P08758	P08758	Annexin A5	ANXA5	YES	Matrisome-associated	ECM-affiliated Proteins	YES	0.118217	0.813266	28.2751	27.4509	28.0159	27.9049	27.9693	27.5129
P08865	P08865	40S ribosomal protein SA	RPSA	-	-	-	YES	-0.0936667	0.776069	29.3933	28.1498	29.0916	29.1107	29.0505	28.7545
P09104-2;P09104	P09104-2;P09104	Gamma-enolase	ENO2	-	-	-	YES	1.43558	0.00609458	27.119	27.2397	27.4097	25.706	25.7293	26.0265
P09382	P09382	Galectin-1	LGALS1	YES	Matrisome-associated	ECM-affiliated Proteins	YES	0.322367	0.342569	29.8592	29.8065	29.4084	29.7473	29.4304	28.9293
P09429;B2RPK0	P09429	High mobility group protein B1	HMGB1	-	-	-	-	-0.864513	0.0315386	26.4294	25.7769	25.7154	27.5549	26.5023	26.4579
P09493-3;P09493-4;P09493-10;P09493-9;P09493-8;P09493	P09493-3;P09493-4;P09493-10;P09493-9;P09493-8;P09493	Tropomyosin alpha-1 chain	TPM1	-	-	-	-	-1.26792	0.168037	26.8018	22.8929	27.2088	26.8226	26.917	26.9677
P09493-5	P09493-5	Tropomyosin alpha-1 chain	TPM1	-	-	-	-	0.484447	0.374565	27.2521	27.6959	27.6917	26.6294	27.0616	27.4953
P09496-2;P09496-4;P09496-3;P09496;P09496-5	P09496-2;P09496-4;P09496-3;P09496;P09496-5	Clathrin light chain A	CLTA	-	-	-	-	0.139767	0.576795	27.6655	28.0197	27.479	27.5952	27.5412	27.6085
P09497-2;P09497	P09497-2;P09497	Clathrin light chain B	CLTB	-	-	-	-	-0.844303	0.0607613	25.4099	25.0675	23.4482	25.8288	25.6699	24.9599
P09651-3;P09651-2;P09651;Q32P51	P09651-3;P09651-2;P09651;Q32P51	Heterogeneous nuclear ribonucleoprotein A1;Heterogeneous nuclear ribonucleoprotein A1, N-terminally processed;Heterogeneous nuclear ribonucleoprotein A1-like 2	HNRNPA1;HNRNPA1L2	-	-	-	-	-0.07376	0.841826	28.4929	29.0609	29.039	28.9569	29.0934	28.7638
P09972	P09972	Fructose-bisphosphate aldolase C	ALDOC	-	-	-	YES	0.452693	0.28058	24.9153	26.2201	25.3125	24.6127	25.1886	25.2885
P62987;P62979;P0CG47;P0CG48	P62987;P62979;P0CG47;P0CG48	Ubiquitin-60S ribosomal protein L40;Ubiquitin;60S ribosomal protein L40;Ubiquitin-40S ribosomal protein S27a;Ubiquitin;40S ribosomal protein S27a;Polyubiquitin-B;Ubiquitin;Polyubiquitin-C;Ubiquitin	UBA52;RPS27A;UBB;UBC	-	-	-	-	0.0818333	0.799068	29.1575	28.8563	29.9539	29.1483	29.4745	29.0994
P0DMV9;P0DMV8;P0DMV8-2	P0DMV9;P0DMV8;P0DMV8-2	Heat shock 70 kDa protein 1B;Heat shock 70 kDa protein 1A	HSPA1B;HSPA1A	-	-	-	-	-0.109243	0.60886	28.7385	28.8348	28.8741	29.0446	28.8127	28.9177
P0DP25;P0DP24;P0DP23;P27482;P02585	P0DP25;P0DP24;P0DP23			-	-	-	-	-0.162203	0.634877	31.7986	30.7701	31.6373	31.6619	31.5057	31.5251
P10253	P10253	Lysosomal alpha-glucosidase;76 kDa lysosomal alpha-glucosidase;70 kDa lysosomal alpha-glucosidase	GAA	-	-	-	YES	0.63506	0.260111	27.0362	26.3891	26.5237	26.2508	26.1334	25.6595
P10586-2;P10586	P10586-2;P10586	Receptor-type tyrosine-protein phosphatase F	PTPRF	-	-	-	YES	-0.59183	0.0490045	27.5826	27.4034	27.816	28.0035	28.2939	28.28
P10599;P10599-2	P10599;P10599-2	Thioredoxin	TXN	-	-	-	YES	0.24001	0.469529	29.3276	30.249	29.6154	29.0623	29.7361	29.6735
P10644;P10644-2	P10644;P10644-2	cAMP-dependent protein kinase type I-alpha regulatory subunit;cAMP-dependent protein kinase type I-alpha regulatory subunit, N-terminally processed	PRKAR1A	-	-	-	-	0.0893867	0.765361	25.9075	26.1506	25.3908	25.7285	26.1609	25.2913
P10809;P10809-2	P10809	60 kDa heat shock protein, mitochondrial	HSPD1	-	-	-	YES	0.669437	0.0285921	29.443	29.8647	29.5476	28.8805	28.8538	29.1126
P10909-4;P10909;P10909-5;P10909-2;P10909-3	P10909-4;P10909;P10909-5;P10909-2;P10909-3	Clusterin;Clusterin beta chain;Clusterin alpha chain	CLU	-	-	-	YES	0.919913	0.0057581	30.296	30.9224	30.6154	29.5703	29.6253	29.8786
P11021	P11021	78 kDa glucose-regulated protein	HSPA5	-	-	-	YES	0.16096	0.411573	30.6129	30.8278	30.7928	30.5849	30.5421	30.6235
P11047	P11047	Laminin subunit gamma-1	LAMC1	YES	Core matrisome	ECM Glycoproteins	YES	0.189523	0.576665	29.459	28.7124	29.4768	29.0096	29.3208	28.7493
P11142;P11142-2;P54652	P11142;P11142-2	Heat shock cognate 71 kDa protein	HSPA8	-	-	-	YES	-0.11056	0.596286	32.1204	32.3652	32.3919	32.4582	32.3428	32.4083
P11216;P11217-2;P11217	P11216	Glycogen phosphorylase, brain form	PYGB	-	-	-	YES	-0.11752	0.827332	27.2134	26.1807	26.8933	27.4004	27.0105	26.229
P11413;P11413-2;P11413-3	P11413;P11413-2;P11413-3	Glucose-6-phosphate 1-dehydrogenase	G6PD	-	-	-	YES	0.7314	0.0232859	28.3752	27.9961	28.2904	27.9128	27.6273	26.9274
P11586;Q6UB35	P11586	C-1-tetrahydrofolate synthase, cytoplasmic;Methylenetetrahydrofolate dehydrogenase;Methenyltetrahydrofolate cyclohydrolase;Formyltetrahydrofolate synthetase;C-1-tetrahydrofolate synthase, cytoplasmic, N-terminally processed	MTHFD1	-	-	-	YES	-0.0586433	0.882185	25.6967	25.8107	25.2799	25.9062	25.7092	25.3478
P11717	P11717	Cation-independent mannose-6-phosphate receptor	IGF2R	-	-	-	YES	0.349207	0.366114	27.1076	28.0344	27.575	27.01	27.2632	27.3961
P11940-2;P11940;Q9H361;Q13310-2;Q13310;Q13310-3;Q4VXU2;Q4VXU2-2;Q5JQF8;Q96DU9-2;Q96DU9	P11940-2;P11940;Q9H361	Polyadenylate-binding protein 1;Polyadenylate-binding protein 3	PABPC1;PABPC3	-	-	-	-	-0.576373	0.1208	27.9877	28.1482	27.4672	28.643	28.4789	28.2103
P12004	P12004	Proliferating cell nuclear antigen	PCNA	-	-	-	YES	0.00453	0.988029	27.8021	27.9048	28.1123	27.6126	28.0391	28.1538
P12081-4;P12081;P12081-3;P12081-2	P12081-4;P12081;P12081-3;P12081-2	Histidine--tRNA ligase, cytoplasmic	HARS	-	-	-	-	-0.409567	0.52299	27.2768	27.0174	26.9418	27.7607	27.4109	27.2933
P12109	P12109	Collagen alpha-1(VI) chain	COL6A1	YES	Core matrisome	Collagens	YES	-0.207013	0.462979	30.1859	29.6295	30.3145	30.0441	30.2574	30.4493
P12268;P20839-2;P20839-4;P20839;P20839-3;P20839-7;P20839-5;P20839-6	P12268	Inosine-5-monophosphate dehydrogenase 2	IMPDH2	-	-	-	YES	0.0816733	0.738775	26.7393	27.3503	26.8482	27.0244	26.8634	26.805
P12270;P12270-2	P12270;P12270-2	Nucleoprotein TPR	TPR	-	-	-	-	0.182447	0.664476	25.7624	25.4933	25.531	25.5421	25.6082	25.089
P12814;P12814-3;P12814-2;P12814-4;P35609-2;P35609	P12814;P12814-3;P12814-2;P12814-4	Alpha-actinin-1	ACTN1	-	-	-	YES	0.2787	0.259857	30.8536	31.0138	30.9975	30.8491	30.5131	30.6665
P12956;P12956-2	P12956;P12956-2	X-ray repair cross-complementing protein 6	XRCC6	-	-	-	-	-0.52317	0.215433	27.9658	27.8787	27.9221	28.5217	28.5402	28.2741
P13010	P13010	X-ray repair cross-complementing protein 5	XRCC5	-	-	-	-	-0.750203	0.110531	28.1594	26.5928	28.5159	28.7676	28.4371	28.314
P13489	P13489	Ribonuclease inhibitor	RNH1	-	-	-	YES	-0.27107	0.55112	27.3048	28.4579	28.1499	28.1457	28.2108	28.3693
P13639	P13639	Elongation factor 2	EEF2	-	-	-	YES	0.660953	0.0164013	30.7619	30.3139	30.7331	30.205	29.872	29.7491
P13667	P13667	Protein disulfide-isomerase A4	PDIA4	-	-	-	-	0.34881	0.245416	28.3738	27.9856	28.5566	27.8701	27.8614	28.1381
P13693;P13693-2;Q56UQ5	P13693;P13693-2	Translationally-controlled tumor protein	TPT1	-	-	-	YES	-0.336613	0.283676	27.7036	27.4224	28.4888	27.9988	28.127	28.4989
P13798	P13798	Acylamino-acid-releasing enzyme	APEH	-	-	-	YES	1.48128	0.00971449	26.475	26.5664	25.6608	25.3683	24.263	24.6272
P13861-2;P13861	P13861-2;P13861	cAMP-dependent protein kinase type II-alpha regulatory subunit	PRKAR2A	-	-	-	YES	0.515487	0.0868016	31.674	31.7585	31.4281	31.2384	31.0876	30.9882
P14314-2;P14314	P14314-2;P14314	Glucosidase 2 subunit beta	PRKCSH	-	-	-	-	-0.490117	0.0812647	28.9035	28.7224	29.3799	29.4103	29.2184	29.8475
P14324-2;P14324	P14324-2;P14324	Farnesyl pyrophosphate synthase	FDPS	-	-	-	-	-0.239283	0.395131	27.5608	27.0467	27.6335	27.7312	27.8146	27.4129
P14618;P14618-2;P14618-3;P30613-2;P30613	P14618;P14618-2;P14618-3	Pyruvate kinase PKM	PKM	-	-	-	YES	-0.0996533	0.701636	31.4525	31.4422	31.3846	31.7381	31.5519	31.2883
P14625;Q58FF3	P14625	Endoplasmin	HSP90B1	-	-	-	YES	-0.13591	0.502306	30.2714	30.626	30.542	30.6059	30.4355	30.8059
P14866;P14866-2	P14866;P14866-2	Heterogeneous nuclear ribonucleoprotein L	HNRNPL	-	-	-	YES	-0.748387	0.19874	27.183	25.6174	27.6523	27.3152	27.7461	27.6365
P14868;P14868-2	P14868;P14868-2	Aspartate--tRNA ligase, cytoplasmic	DARS	-	-	-	YES	0.357863	0.353013	27.004	26.4329	26.7209	26.2735	26.5019	26.3088
P15151-3;P15151-2;P15151-4;P15151	P15151-3;P15151-2;P15151-4;P15151	Poliovirus receptor	PVR	-	-	-	-	-1.29124	0.104283	27.4614	28.161	28.3999	28.5174	29.0487	30.33
P15170-2;P15170-3;P15170;Q8IYD1	P15170-2;P15170-3;P15170;Q8IYD1	Eukaryotic peptide chain release factor GTP-binding subunit ERF3A;Eukaryotic peptide chain release factor GTP-binding subunit ERF3B	GSPT1;GSPT2	-	-	-	-	0.291043	0.659323	25.4474	25.2159	25.7855	24.0014	25.6984	25.8759
P15291-2;P15291	P15291-2;P15291	Beta-1,4-galactosyltransferase 1;Lactose synthase A protein;N-acetyllactosamine synthase;Beta-N-acetylglucosaminylglycopeptide beta-1,4-galactosyltransferase;Beta-N-acetylglucosaminyl-glycolipid beta-1,4-galactosyltransferase;Processed beta-1,4-galactosyltransferase 1	B4GALT1	-	-	-	YES	-0.322397	0.606544	26.5447	26.2779	26.1881	26.9774	26.4827	26.5177
P15311	P15311	Ezrin	EZR	-	-	-	YES	-0.0398	0.88278	28.4614	29.0321	28.5823	28.5242	28.7648	28.906
P15374	P15374	Ubiquitin carboxyl-terminal hydrolase isozyme L3	UCHL3	-	-	-	-	-0.297953	0.631066	28.1508	27.0847	28.0908	28.0144	28.0698	28.136
P15586;P15586-2	P15586;P15586-2	N-acetylglucosamine-6-sulfatase	GNS	-	-	-	YES	0.28356	0.20112	27.6093	28.0617	27.4656	27.4425	27.5745	27.2689
P15880	P15880	40S ribosomal protein S2	RPS2	-	-	-	YES	0.35226	0.311178	24.8352	25.2894	24.7118	25.1899	24.6226	23.9671
P15924;P15924-3;P15924-2	P15924;P15924-3;P15924-2	Desmoplakin	DSP	-	-	-	YES	-1.89671	0.184155	23.9746	23.1336	27.0551	25.5987	30.1636	24.091
P16035	P16035	Metalloproteinase inhibitor 2	TIMP2	YES	Matrisome-associated	ECM Regulators	-	-0.04053	0.92985	29.03	31.169	29.0932	29.6702	30.042	29.7015
P16070-18;P16070-12;P16070-14;P16070-13;P16070-11;P16070-10;P16070-16;P16070-8;P16070-17;P16070-6;P16070-4;P16070-3;P16070-7;P16070-5;P16070;P16070-15;P16070-9;P16070-19	P16070-18;P16070-12;P16070-14;P16070-13;P16070-11;P16070-10;P16070-16;P16070-8;P16070-17;P16070-6;P16070-4;P16070-3;P16070-7;P16070-5;P16070;P16070-15;P16070-9	CD44 antigen	CD44	-	-	-	YES	-0.8479	0.00900918	29.9499	29.8472	30.4953	30.7195	30.8946	31.2221
P16152;P16152-2	P16152;P16152-2	Carbonyl reductase [NADPH] 1	CBR1	-	-	-	YES	0.599057	0.110818	26.3216	26.3588	26.2136	25.8816	25.8903	25.3249
P16403	P16403	Histone H1.2	HIST1H1C	-	-	-	-	0.103737	0.799568	25.1747	25.8574	26.4583	25.8973	25.6752	25.6066
P16870-2;P16870	P16870-2;P16870	Carboxypeptidase E	CPE	-	-	-	YES	-0.343547	0.315534	26.2182	26.3518	26.8231	26.5307	26.8227	27.0703
P16949;P16949-2	P16949;P16949-2	Stathmin	STMN1	-	-	-	YES	0.344317	0.231109	28.3168	29.0019	29.0545	28.4919	28.5108	28.3375
P17174;P17174-2	P17174;P17174-2	Aspartate aminotransferase, cytoplasmic	GOT1	-	-	-	YES	0.115807	0.605382	28.8286	28.6052	28.738	28.7187	28.6801	28.4255
P17931	P17931	Galectin-3	LGALS3	YES	Matrisome-associated	ECM-affiliated Proteins	YES	0.610067	0.238183	27.1052	25.3951	26.1558	26.076	25.4377	25.3122
P17936;P17936-2	P17936;P17936-2	Insulin-like growth factor-binding protein 3	IGFBP3	YES	Core matrisome	ECM Glycoproteins	-	-2.03851	8.13585e-05	27.3097	28.4815	27.6013	29.8181	29.8267	29.8632
P17980	P17980	26S protease regulatory subunit 6A	PSMC3	-	-	-	-	0.36184	0.147554	27.2246	27.6137	27.2433	26.9857	27.0735	26.937
P17987	P17987	T-complex protein 1 subunit alpha	TCP1	-	-	-	YES	-0.46095	0.0634052	28.6345	28.0599	28.5916	28.8468	28.904	28.918
P18085	P18085	ADP-ribosylation factor 4	ARF4	-	-	-	YES	0.238687	0.684633	27.0091	24.1716	25.4971	25.5124	25.3406	25.1089
P18206-2;P18206;P18206-3	P18206-2;P18206	Vinculin	VCL	-	-	-	YES	0.39972	0.0604607	29.7704	30.2626	29.8853	29.7041	29.4558	29.5591
P18669;P15259;Q8N0Y7	P18669;P15259	Phosphoglycerate mutase 1;Phosphoglycerate mutase 2	PGAM1;PGAM2	-	-	-	-	0.379287	0.142076	30.6795	30.8431	30.5921	30.0305	30.4428	30.5035
P19105;O14950;P24844;P24844-2	P19105;O14950	Myosin regulatory light chain 12A;Myosin regulatory light chain 12B	MYL12A;MYL12B	-	-	-	-	0.476913	0.0729129	28.7813	28.8952	28.8103	28.5605	28.279	28.2166
P19338	P19338	Nucleolin	NCL	-	-	-	YES	-0.741773	0.00292287	30.516	30.8914	30.7257	31.4848	31.396	31.4776
P19623	P19623	Spermidine synthase	SRM	-	-	-	-	0.38875	0.0838924	26.8343	27.0265	26.8908	26.3958	26.6728	26.5167
P20290-2;P20290	P20290-2;P20290	Transcription factor BTF3	BTF3	-	-	-	-	0.810907	0.198294	25.8216	26.5358	27.42	26.056	25.9348	25.354
P20618	P20618	Proteasome subunit beta type-1	PSMB1	-	-	-	YES	-0.414703	0.401507	26.7897	24.5803	26.6458	26.4593	26.5555	26.2452
P20700	P20700	Lamin-B1	LMNB1	-	-	-	-	0.238307	0.394658	27.6087	27.9992	27.5499	27.4888	27.6237	27.3305
P20810-3;P20810-4;P20810-8;P20810-2;P20810;P20810-9;P20810-5;P20810-10;P20810-7;P20810-6	P20810-3;P20810-4;P20810-8;P20810-2;P20810;P20810-9;P20810-5;P20810-10;P20810-7;P20810-6	Calpastatin	CAST	-	-	-	-	0.81628	0.00653778	27.2424	27.9022	27.4333	26.7281	26.737	26.664
P20933	P20933	N(4)-(beta-N-acetylglucosaminyl)-L-asparaginase;Glycosylasparaginase alpha chain;Glycosylasparaginase beta chain	AGA	-	-	-	-	-0.00858333	0.977703	27.0025	27.9798	27.3614	27.4063	27.3993	27.5638
P21281;P15313	P21281	V-type proton ATPase subunit B, brain isoform	ATP6V1B2	-	-	-	YES	0.26508	0.26501	26.2129	26.2799	26.4613	26.3069	26.2746	25.5773
P21333-2;P21333	P21333-2;P21333	Filamin-A	FLNA	-	-	-	YES	-0.354117	0.0902406	31.1875	31.3646	30.905	31.6638	31.4646	31.3911
P22061;P22061-2	P22061;P22061-2	Protein-L-isoaspartate(D-aspartate) O-methyltransferase	PCMT1	-	-	-	YES	-0.395593	0.154367	27.4122	27.3356	27.5689	27.9992	27.7115	27.7929
P22102;P22102-2	P22102;P22102-2	Trifunctional purine biosynthetic protein adenosine-3;Phosphoribosylamine--glycine ligase;Phosphoribosylformylglycinamidine cyclo-ligase;Phosphoribosylglycinamide formyltransferase	GART	-	-	-	YES	-0.13422	0.630098	26.9506	26.1363	27.054	26.7104	26.7914	27.0418
P22314-2;P22314	P22314-2;P22314	Ubiquitin-like modifier-activating enzyme 1	UBA1	-	-	-	YES	1.09987	0.000815113	29.2713	29.257	29.2332	28.2821	28.374	27.8058
P22392-2;P22392;O60361	P22392-2;P22392;O60361	Nucleoside diphosphate kinase B;Putative nucleoside diphosphate kinase	NME2;NME2P1	-	-	-	-	0.737623	0.0648079	30.0878	30.4429	30.0825	29.541	29.4705	29.3887
P22626	P22626	Heterogeneous nuclear ribonucleoproteins A2/B1	HNRNPA2B1	-	-	-	YES	0.171037	0.566481	30.1403	31.1343	30.1467	30.1021	30.338	30.4681
P23246;P23246-2	P23246;P23246-2	Splicing factor, proline- and glutamine-rich	SFPQ	-	-	-	-	-0.40421	0.17516	28.5318	28.5661	27.9347	28.7968	28.923	28.5253
P23396;P23396-2	P23396;P23396-2	40S ribosomal protein S3	RPS3	-	-	-	YES	-0.22497	0.646108	26.3396	26.1002	25.7656	26.7838	26.6402	25.4563
P23526;P23526-2	P23526;P23526-2	Adenosylhomocysteinase	AHCY	-	-	-	YES	-0.0149633	0.950303	28.0378	28.1075	28.5247	28.3307	28.3631	28.0211
P23528	P23528	Cofilin-1	CFL1	-	-	-	YES	0.63585	0.0150871	31.305	31.9266	31.5829	30.9337	31.0992	30.874
P23588;P23588-2	P23588;P23588-2	Eukaryotic translation initiation factor 4B	EIF4B	-	-	-	-	-0.614157	0.143394	27.451	26.4332	28.0872	27.5201	28.1236	28.1703
P24534	P24534	Elongation factor 1-beta	EEF1B2	-	-	-	-	-0.04321	0.911794	28.8469	28.9947	28.8268	29.3532	28.6121	28.8327
P24666;P24666-4;P24666-3;P24666-2	P24666;P24666-4;P24666-3;P24666-2	Low molecular weight phosphotyrosine protein phosphatase	ACP1	-	-	-	YES	1.09656	0.0165155	25.0958	25.4239	25.5098	24.2615	24.2391	24.2391
P24821;P24821-3;P24821-5;P24821-6	P24821;P24821-3;P24821-5;P24821-6	Tenascin	TNC	YES	Core matrisome	ECM Glycoproteins	-	-1.92249	0.0234186	28.6939	29.237	28.1412	31.0312	30.6755	30.1328
P25205;P25205-2	P25205;P25205-2	DNA replication licensing factor MCM3	MCM3	-	-	-	-	0.440733	0.705831	30.7766	30.9979	31.0681	30.6936	30.4428	30.3839
P25398	P25398	40S ribosomal protein S12	RPS12	-	-	-	-	0.0647633	0.806967	28.6316	29.1378	28.6911	28.881	28.7765	28.6086
P25685;P25685-2	P25685;P25685-2	DnaJ homolog subfamily B member 1	DNAJB1	-	-	-	YES	-0.000323333	0.99923	25.3141	25.9774	24.8522	25.4158	25.63	25.0989
P25705;P25705-2;P25705-3	P25705;P25705-2;P25705-3	ATP synthase subunit alpha, mitochondrial	ATP5A1	-	-	-	-	0.178543	0.812434	26.4105	26.346	26.0416	26.0691	26.0965	26.097
P25786;P25786-2	P25786;P25786-2	Proteasome subunit alpha type-1	PSMA1	-	-	-	YES	0.202007	0.408478	27.4278	27.4769	26.988	27.0867	27.1343	27.0658
P25787	P25787	Proteasome subunit alpha type-2	PSMA2	-	-	-	YES	0.339613	0.307498	26.8086	26.1613	27.0288	26.6158	26.2375	26.1265
P25788-2;P25788	P25788-2;P25788	Proteasome subunit alpha type-3	PSMA3	-	-	-	YES	0.1291	0.520536	28.0822	28.211	28.4251	28.0346	28.1482	28.1482
P25789;P25789-2	P25789;P25789-2	Proteasome subunit alpha type-4	PSMA4	-	-	-	YES	0.236247	0.541567	27.8032	28.0956	28.0514	27.9276	27.9394	27.3745
P26038	P26038	Moesin	MSN	-	-	-	YES	-0.79043	0.0196207	30.4539	31.1765	30.7096	31.5634	31.6421	31.5058
P26373;P26373-2	P26373;P26373-2	60S ribosomal protein L13	RPL13	-	-	-	-	0.820973	0.140551	26.4803	27.6751	27.3174	26.4802	25.8579	26.6717
P26583	P26583	High mobility group protein B2	HMGB2	-	-	-	-	-1.58326	0.00555299	24.0911	25.8842	25.354	26.8517	26.5842	26.6432
P26599;P26599-2;P26599-3	P26599;P26599-2;P26599-3	Polypyrimidine tract-binding protein 1	PTBP1	-	-	-	YES	0.384893	0.583092	25.5187	26.0682	24.6476	24.8953	25.5834	24.6011
P26639;P26639-2;Q9BW92-2;Q9BW92	P26639;P26639-2	Threonine--tRNA ligase, cytoplasmic	TARS	-	-	-	YES	0.09397	0.708629	29.0789	28.6383	28.7668	28.894	28.8498	28.4583
P26640;P26640-2	P26640	Valine--tRNA ligase	VARS	-	-	-	-	0.21461	0.434296	25.9025	25.8532	25.3473	25.5836	25.5891	25.2865
P26641;P26641-2	P26641;P26641-2	Elongation factor 1-gamma	EEF1G	-	-	-	YES	-0.01574	0.981456	30.7761	28.3605	29.8172	30.1901	29.8465	28.9645
P27348	P27348	14-3-3 protein theta	YWHAQ	-	-	-	YES	-0.24015	0.344626	29.7296	29.2478	29.766	29.7165	29.8384	29.909
P27708	P27708	CAD protein;Glutamine-dependent carbamoyl-phosphate synthase;Aspartate carbamoyltransferase;Dihydroorotase	CAD	-	-	-	YES	-0.814817	0.111939	27.444	25.0298	27.0136	27.6178	27.5459	26.7681
P27797	P27797	Calreticulin	CALR	-	-	-	YES	-0.262213	0.238311	30.0742	30.0557	30.0069	30.1419	30.1744	30.6072
P27816-6;P27816;P27816-2;P27816-5;P27816-7;P27816-4	P27816-6;P27816;P27816-2;P27816-5	Microtubule-associated protein 4	MAP4	-	-	-	-	0.02552	0.904029	27.3704	27.9393	27.565	27.5766	27.6985	27.5231
P28066;P28066-2	P28066;P28066-2	Proteasome subunit alpha type-5	PSMA5	-	-	-	YES	0.149363	0.539756	28.7897	28.9597	29.1638	28.9653	28.564	28.9358
P28070	P28070	Proteasome subunit beta type-4	PSMB4	-	-	-	YES	-0.0460633	0.936731	26.8398	25.6599	26.9045	26.3623	26.6996	26.4804
P28072	P28072	Proteasome subunit beta type-6	PSMB6	-	-	-	YES	-0.463637	0.268834	28.7761	27.1209	28.9231	28.8303	28.6541	28.7265
P28482-2;P28482	P28482-2;P28482	Mitogen-activated protein kinase 1	MAPK1	-	-	-	-	-0.16259	0.693446	26.1923	26.1957	26.6562	26.8022	26.8298	25.9
P28838-2;P28838	P28838-2;P28838	Cytosol aminopeptidase	LAP3	-	-	-	YES	0.154667	0.569529	27.5433	26.9996	27.6246	27.5818	27.2286	26.8931
P29401;P29401-2	P29401;P29401-2	Transketolase	TKT	-	-	-	YES	0.628173	0.0289125	29.5965	30.3382	29.6565	29.3925	29.2291	29.0851
P29508;P29508-2;P48594	P29508;P29508-2;P48594	Serpin B3;Serpin B4	SERPINB3;SERPINB4	-	-	-	-	-2.0176	0.0698922	22.9414	23.3214	24.211	24.5181	28.0108	23.9977
P29692;P29692-2;P29692-4	P29692;P29692-2;P29692-4	Elongation factor 1-delta	EEF1D	-	-	-	-	-0.409107	0.270228	30.0255	29.9386	30.0561	30.321	30.3569	30.5696
P29966	P29966	Myristoylated alanine-rich C-kinase substrate	MARCKS	-	-	-	YES	0.192397	0.625486	25.9182	26.5108	26.671	25.5545	26.082	26.8864
P30040;P30040-2	P30040	Endoplasmic reticulum resident protein 29	ERP29	-	-	-	-	-0.631183	0.025186	27.4689	26.8467	27.2748	27.8298	27.7657	27.8884
P30041	P30041	Peroxiredoxin-6	PRDX6	-	-	-	YES	0.23765	0.585477	29.2988	27.9224	28.6972	28.8185	28.4778	27.9091
P30044-2;P30044-3;P30044;P30044-4	P30044-2;P30044-3;P30044;P30044-4	Peroxiredoxin-5, mitochondrial	PRDX5	-	-	-	YES	1.3716	0.0295479	26.9146	26.7655	26.6725	25.8608	25.5923	24.7846
P30048-2;P30048	P30048-2;P30048	Thioredoxin-dependent peroxide reductase, mitochondrial	PRDX3	-	-	-	-	-0.06279	0.859136	28.3743	27.5073	28.7179	28.3701	28.1543	28.2633
P30050;P30050-2	P30050;P30050-2	60S ribosomal protein L12	RPL12	-	-	-	YES	-0.115623	0.844219	25.8548	25.7604	25.3945	26.4319	25.654	25.2706
P30085;P30085-2	P30085;P30085-2	UMP-CMP kinase	CMPK1	-	-	-	YES	-0.345917	0.557207	25.2973	25.6281	25.5493	25.6916	25.8278	25.9931
P30086	P30086	Phosphatidylethanolamine-binding protein 1;Hippocampal cholinergic neurostimulating peptide	PEBP1	-	-	-	YES	-0.136177	0.685581	26.5968	27.3492	26.8449	27.2224	27.1218	26.8552
P30101	P30101	Protein disulfide-isomerase A3	PDIA3	-	-	-	YES	0.463463	0.0904436	30.1476	30.7756	30.471	29.9571	29.8232	30.2235
P30153;P30154-4;P30154;P30154-2;P30154-5;P30154-3	P30153	Serine/threonine-protein phosphatase 2A 65 kDa regulatory subunit A alpha isoform	PPP2R1A	-	-	-	YES	0.17226	0.552923	29.4794	28.3894	29.2916	29.0138	28.8603	28.7695
P30520	P30520	Adenylosuccinate synthetase isozyme 2	ADSS	-	-	-	YES	-0.544293	0.37534	26.5952	24.5263	26.7325	26.8976	26.5672	26.0221
P31150	P31150	Rab GDP dissociation inhibitor alpha	GDI1	-	-	-	-	-0.20109	0.421019	27.6123	27.2449	27.9997	27.9205	27.734	27.8056
P31153;P31153-2;Q00266	P31153;P31153-2	S-adenosylmethionine synthase isoform type-2	MAT2A	-	-	-	-	-0.61472	0.0105227	27.4769	27.5126	27.5347	27.9785	28.2339	28.1561
P31431-2;P31431	P31431-2;P31431	Syndecan-4	SDC4	YES	Matrisome-associated	ECM-affiliated Proteins	YES	-0.01205	0.970273	28.6715	29.482	29.1019	28.5164	29.1779	29.5971
P31939-2;P31939	P31939-2;P31939	Bifunctional purine biosynthesis protein PURH;Phosphoribosylaminoimidazolecarboxamide formyltransferase;IMP cyclohydrolase	ATIC	-	-	-	YES	-0.88831	0.0134691	26.7734	26.6239	27.0276	27.9465	27.5351	27.6082
P31942-3;P31942-2;P31942;P31942-4;P31942-6;P31942-5	P31942-3;P31942-2;P31942;P31942-4	Heterogeneous nuclear ribonucleoprotein H3	HNRNPH3	-	-	-	-	0.05639	0.860165	26.718	26.7779	26.4238	26.4696	26.9056	26.3754
P31943	P31943	Heterogeneous nuclear ribonucleoprotein H;Heterogeneous nuclear ribonucleoprotein H, N-terminally processed	HNRNPH1	-	-	-	-	-0.0918867	0.744843	28.5942	27.9955	28.301	28.4006	28.48	28.2858
P31946	P31946	14-3-3 protein beta/alpha;14-3-3 protein beta/alpha, N-terminally processed	YWHAB	-	-	-	YES	-0.305853	0.251229	30.4332	30.1279	30.7312	30.5465	30.7275	30.9359
P31947;P31947-2	P31947;P31947-2	14-3-3 protein sigma	SFN	-	-	-	YES	0.194663	0.439645	28.9916	29.0111	29.2336	28.8151	28.7778	29.0594
P31948;P31948-3;P31948-2	P31948;P31948-3;P31948-2	Stress-induced-phosphoprotein 1	STIP1	-	-	-	-	0.0488867	0.877884	29.7721	29.2407	30.1691	29.8111	29.648	29.5762
P31949	P31949	Protein S100-A11;Protein S100-A11, N-terminally processed	S100A11	YES	Matrisome-associated	Secreted Factors	YES	0.56011	0.385726	27.3276	27.8589	27.9187	27.1943	27.638	26.5925
P32004-3;P32004-2;P32004	P32004-3;P32004-2;P32004	Neural cell adhesion molecule L1	L1CAM	-	-	-	-	1.49984	0.000480946	28.4261	29.1458	28.4153	26.8721	27.2647	27.3509
P32119;P32119-2	P32119	Peroxiredoxin-2	PRDX2	-	-	-	YES	-0.573713	0.0986267	28.5214	28.0547	28.9492	28.9059	29.3435	28.997
P33176;O60282;Q12840;O60282-2	P33176	Kinesin-1 heavy chain	KIF5B	-	-	-	-	-0.2957	0.35826	25.0847	25.4829	25.3894	25.5729	25.8351	25.4361
P33240-2;P33240	P33240-2;P33240	Cleavage stimulation factor subunit 2	CSTF2	-	-	-	-	-0.183687	0.633497	25.8868	26.5075	25.5178	26.419	26.3005	25.7435
P33316-2;P33316	P33316-2;P33316	Deoxyuridine 5-triphosphate nucleotidohydrolase, mitochondrial	DUT	-	-	-	YES	-0.10925	0.723514	27.0505	27.4951	27.2568	26.8399	27.4516	27.8387
P33993;P33993-3;P33993-2	P33993;P33993-3;P33993-2	DNA replication licensing factor MCM7	MCM7	-	-	-	-	1.40157	0.0135697	24.7506	24.4443	25.8183	23.7888	23.2177	23.8021
P34931	P34931	Heat shock 70 kDa protein 1-like	HSPA1L	-	-	-	-	1.80304	0.240051	28.1845	28.5955	28.3914	28.4819	28.2848	22.9956
P34932;P34932-2	P34932	Heat shock 70 kDa protein 4	HSPA4	-	-	-	YES	-0.3167	0.113276	29.1408	29.1236	29.4487	29.6233	29.454	29.5859
P35237	P35237	Serpin B6	SERPINB6	YES	Matrisome-associated	ECM Regulators	YES	0.189457	0.725882	27.3274	26.2967	27.4193	26.9795	26.7376	26.7579
P35241;P35241-5;P35241-4;P35241-2;P35241-3	P35241;P35241-5;P35241-4	Radixin	RDX	-	-	-	YES	-0.527967	0.429836	26.1295	23.6244	24.4268	26.1053	25.3744	24.2849
P35244	P35244	Replication protein A 14 kDa subunit	RPA3	-	-	-	-	0.03182	0.928889	25.6507	25.7408	24.8816	25.6409	25.3951	25.1418
P35443	P35443	Thrombospondin-4	THBS4	YES	Core matrisome	ECM Glycoproteins	YES	-0.27031	0.705918	25.5777	25.1677	25.5503	25.3035	25.1641	26.6391
P35579;P35579-2;P35749-4;P35749-3;P35749;P35749-2;REV__Q08AF3;REV__Q9UKV3-5;REV__Q9UKV3	P35579;P35579-2	Myosin-9	MYH9	-	-	-	YES	0.355097	0.40472	30.6208	30.9088	30.4055	30.3194	30.3919	30.1585
P35606-2;P35606	P35606-2;P35606	Coatomer subunit beta	COPB2	-	-	-	-	0.101063	0.666214	26.9271	26.3326	27.1881	26.6982	26.7029	26.7434
P35637-2;P35637	P35637-2;P35637	RNA-binding protein FUS	FUS	-	-	-	-	-0.25584	0.44155	25.1129	24.9259	25.1329	25.1717	25.398	25.3695
P35908	P35908	Keratin, type II cytoskeletal 2 epidermal	KRT2	-	-	-	YES	-1.13849	0.216628	31.4305	29.0486	30.7221	32.1399	33.0812	29.3954
P35998;P35998-2	P35998;P35998-2	26S protease regulatory subunit 7	PSMC2	-	-	-	-	-0.147307	0.717881	27.087	26.034	26.9668	27.1329	27.0579	26.3389
P36578	P36578	60S ribosomal protein L4	RPL4	-	-	-	YES	0.218387	0.631266	25.9407	26.636	26.7732	26.1556	25.9549	26.5842
P37802;P37802-2;Q9UI15	P37802;P37802-2	Transgelin-2	TAGLN2	-	-	-	YES	0.754877	0.0396816	30.2866	29.8844	29.6413	29.3136	29.233	29.0011
P37837	P37837	Transaldolase	TALDO1	-	-	-	YES	0.34322	0.173045	28.104	28.2715	28.099	27.9798	27.6331	27.832
P38159;P38159-3;P38159-2;Q96E39;O75526;Q8N7X1	P38159;P38159-3;P38159-2;Q96E39;O75526	RNA-binding motif protein, X chromosome;RNA-binding motif protein, X chromosome, N-terminally processed;RNA binding motif protein, X-linked-like-1;RNA-binding motif protein, X-linked-like-2	RBMX;RBMXL1;RBMXL2	-	-	-	-	0.0298333	0.952209	24.4301	25.9298	24.3759	24.3426	25.5216	24.7822
P38606-2;P38606	P38606-2;P38606	V-type proton ATPase catalytic subunit A	ATP6V1A	-	-	-	YES	0.293103	0.481426	25.825	25.8636	26.1205	25.7108	25.5131	25.7058
P38646	P38646	Stress-70 protein, mitochondrial	HSPA9	-	-	-	YES	-0.27669	0.341641	28.911	29.0681	29.1999	29.4829	29.5396	28.9866
P38919	P38919	Eukaryotic initiation factor 4A-III;Eukaryotic initiation factor 4A-III, N-terminally processed	EIF4A3	-	-	-	-	0.0482933	0.942613	26.0858	27.1722	25.6191	26.3236	26.5359	25.8728
P39023;Q92901	P39023	60S ribosomal protein L3	RPL3	-	-	-	YES	0.601943	0.12402	26.7235	27.8138	27.238	26.4266	26.2774	27.2654
P39687;O43423;O95626	P39687	Acidic leucine-rich nuclear phosphoprotein 32 family member A	ANP32A	-	-	-	-	-0.210527	0.491738	27.5931	28.0062	28.1543	28.3543	27.6925	28.3384
P40121;P40121-2	P40121;P40121-2	Macrophage-capping protein	CAPG	-	-	-	YES	-0.280307	0.596849	29.2724	29.2182	29.4395	29.644	29.6585	29.4685
P40227;P40227-2;Q92526;Q92526-2;Q92526-3	P40227;P40227-2	T-complex protein 1 subunit zeta	CCT6A	-	-	-	YES	-0.0327967	0.891537	28.2926	28.875	28.2977	28.5859	28.5389	28.4388
P40925;P40925-3;P40925-2	P40925;P40925-3;P40925-2	Malate dehydrogenase, cytoplasmic	MDH1	-	-	-	YES	-0.398803	0.227089	27.6568	27.1433	27.3279	28.0776	27.9916	27.2552
P40926;P40926-2	P40926;P40926-2	Malate dehydrogenase, mitochondrial	MDH2	-	-	-	YES	0.907183	0.00411238	28.449	29.1211	28.7403	27.9601	27.8298	27.799
P41250	P41250	Glycine--tRNA ligase	GARS	-	-	-	YES	-0.7191	0.0236079	27.9411	27.0176	27.7445	28.6752	28.1727	28.0126
P41567;O60739	P41567;O60739	Eukaryotic translation initiation factor 1;Eukaryotic translation initiation factor 1b	EIF1;EIF1B	-	-	-	-	-0.694057	0.191172	26.5404	24.9998	26.0326	26.7796	26.5069	26.3685
P42167-3;P42167-2;P42167;P42166	P42167-3;P42167-2;P42167;P42166	Lamina-associated polypeptide 2, isoforms beta/gamma;Thymopoietin;Thymopentin;Lamina-associated polypeptide 2, isoform alpha;Thymopoietin;Thymopentin	TMPO	-	-	-	-	-0.597477	0.243994	25.1718	25.8711	25.2211	25.8822	26.0928	26.0814
P42785;P42785-2	P42785;P42785-2	Lysosomal Pro-X carboxypeptidase	PRCP	-	-	-	YES	0.523833	0.272128	29.5525	29.836	29.3033	29.6354	29.0515	28.4334
P43034;P43034-2	P43034	Platelet-activating factor acetylhydrolase IB subunit alpha	PAFAH1B1	-	-	-	YES	-0.2934	0.218751	25.9484	26.0691	26.1289	26.6089	26.2444	26.1733
P43243;P43243-2	P43243;P43243-2	Matrin-3	MATR3	-	-	-	-	0.0773867	0.900284	26.5107	25.5772	26.2415	25.9153	26.032	26.15
P43487-2;P43487	P43487-2;P43487	Ran-specific GTPase-activating protein	RANBP1	-	-	-	-	0.241657	0.808593	27.2995	24.2599	27.9282	23.7306	27.1593	27.8727
P43490	P43490	Nicotinamide phosphoribosyltransferase	NAMPT	-	-	-	YES	0.43284	0.138372	27.7996	27.9356	28.1425	27.6134	27.3871	27.5786
P43686-2;P43686	P43686-2;P43686	26S protease regulatory subunit 6B	PSMC4	-	-	-	-	0.155837	0.559803	26.4979	26.9268	26.4525	26.7176	26.4004	26.2916
P45973	P45973	Chromobox protein homolog 5	CBX5	-	-	-	-	0.32494	0.265917	24.5888	24.8757	24.3068	24.0059	23.9761	24.8146
P45974-2;P45974;Q92995-2;Q92995	P45974-2;P45974	Ubiquitin carboxyl-terminal hydrolase 5	USP5	-	-	-	-	-0.05707	0.819474	27.1877	26.8817	27.5951	27.3164	27.3489	27.1704
P46108;P46108-2	P46108;P46108-2	Adapter molecule crk	CRK	-	-	-	YES	0.280977	0.438015	26.4912	27.2277	27.0286	26.9476	26.8832	26.0738
P46109	P46109	Crk-like protein	CRKL	-	-	-	-	-0.760817	0.161271	25.755	23.9815	25.5597	26.1186	25.7368	25.7233
P46777	P46777	60S ribosomal protein L5	RPL5	-	-	-	YES	0.23372	0.365027	26.569	27.2142	27.0457	26.6084	26.6862	26.8332
P46778	P46778	60S ribosomal protein L21	RPL21	-	-	-	-	0.717103	0.0173623	25.279	26.1127	25.7717	24.6944	24.919	25.3987
P46782	P46782	40S ribosomal protein S5;40S ribosomal protein S5, N-terminally processed	RPS5	-	-	-	YES	-0.284127	0.370255	26.5582	25.9112	25.9108	26.489	26.6007	26.1429
P46940	P46940	Ras GTPase-activating-like protein IQGAP1	IQGAP1	-	-	-	YES	0.237607	0.408209	28.0318	28.1566	27.6105	27.9606	27.7358	27.3898
P47224	P47224	Guanine nucleotide exchange factor MSS4	RABIF	-	-	-	-	0.378123	0.279233	24.6988	24.2773	24.8285	24.5153	24.0392	24.1158
P47756-2;P47756	P47756-2;P47756	F-actin-capping protein subunit beta	CAPZB	-	-	-	YES	0.0570367	0.785716	27.9912	28.1742	28.1735	27.9665	28.2325	27.9688
P48147	P48147	Prolyl endopeptidase	PREP	-	-	-	-	-1.06473	0.0978826	25.6252	22.9903	25.208	25.7844	26.0002	25.2332
P48444;P48444-2	P48444;P48444-2	Coatomer subunit delta	ARCN1	-	-	-	-	0.0326533	0.920027	25.8473	25.8716	25.9361	26.152	25.9361	25.4689
P48637;P48637-2	P48637;P48637-2	Glutathione synthetase	GSS	-	-	-	YES	0.0944433	0.720383	28.2598	28.3703	28.4204	28.4918	28.2633	28.0121
P48643;P48643-2	P48643;P48643-2	T-complex protein 1 subunit epsilon	CCT5	-	-	-	YES	0.0809933	0.747825	29.3386	29.0699	29.3091	29.3539	29.2917	28.829
P49006	P49006	MARCKS-related protein	MARCKSL1	-	-	-	YES	-0.184993	0.640686	24.5941	23.8782	23.9417	24.5741	24.936	23.4588
P49189;P49189-2	P49189	4-trimethylaminobutyraldehyde dehydrogenase	ALDH9A1	-	-	-	YES	0.19789	0.621666	26.37	26.065	26.4681	26.7892	26.6223	24.8981
P49321;P49321-3;P49321-4;P49321-2	P49321;P49321-3;P49321-4;P49321-2	Nuclear autoantigenic sperm protein	NASP	-	-	-	-	-0.231977	0.424935	27.6668	28.6612	28.2159	28.4408	28.2063	28.5929
P49327	P49327	Fatty acid synthase;[Acyl-carrier-protein] S-acetyltransferase;[Acyl-carrier-protein] S-malonyltransferase;3-oxoacyl-[acyl-carrier-protein] synthase;3-oxoacyl-[acyl-carrier-protein] reductase;3-hydroxyacyl-[acyl-carrier-protein] dehydratase;Enoyl-[acyl-carrier-protein] reductase;Oleoyl-[acyl-carrier-protein] hydrolase	FASN	-	-	-	YES	-1.01873	0.0977691	27.7199	25.7104	27.2354	28.2811	28.0633	27.3774
P49368;P49368-2	P49368;P49368-2	T-complex protein 1 subunit gamma	CCT3	-	-	-	YES	-0.166107	0.558206	28.2948	28.532	28.1876	28.7228	28.4055	28.3844
P49588;P49588-2	P49588;P49588-2	Alanine--tRNA ligase, cytoplasmic	AARS	-	-	-	YES	-0.757557	0.0401731	26.4449	25.455	26.2701	26.9956	26.826	26.621
P49720	P49720	Proteasome subunit beta type-3	PSMB3	-	-	-	YES	-0.0736733	0.839704	25.8787	25.8905	25.2671	25.9017	25.8315	25.5241
P49721	P49721	Proteasome subunit beta type-2	PSMB2	-	-	-	YES	-0.173717	0.662076	27.7526	26.102	27.0317	27.5659	27.3027	26.5388
P49736	P49736	DNA replication licensing factor MCM2	MCM2	-	-	-	-	0.493093	0.247736	24.9491	24.3004	25.7699	24.4808	24.4675	24.5919
P49915-2;P49915	P49915-2;P49915	GMP synthase [glutamine-hydrolyzing]	GMPS	-	-	-	-	-0.02437	0.962417	24.8976	24.7644	24.4264	25.1618	24.7288	24.2709
P50395;P50395-2	P50395;P50395-2	Rab GDP dissociation inhibitor beta	GDI2	-	-	-	YES	-0.122737	0.653644	29.7838	29.2579	29.9959	29.983	29.7763	29.6464
P50454	P50454	Serpin H1	SERPINH1	YES	Matrisome-associated	ECM Regulators	-	0.75292	0.0212615	28.1406	28.8054	28.6133	27.9902	27.7257	27.5848
P50502;Q8NFI4;Q8IZP2	P50502;Q8NFI4;Q8IZP2	Hsc70-interacting protein;Putative protein FAM10A5;Putative protein FAM10A4	ST13;ST13P5;ST13P4	-	-	-	-	0.187263	0.507199	26.1066	26.4335	26.2651	26.2258	25.7622	26.2555
P50579-3;P50579-2;P50579	P50579-3;P50579-2;P50579	Methionine aminopeptidase 2	METAP2	-	-	-	-	-1.64832	0.00157924	25.0764	24.1425	25.5776	25.8711	26.7747	27.0957
P50990;P50990-2;P50990-3	P50990;P50990-2;P50990-3	T-complex protein 1 subunit theta	CCT8	-	-	-	YES	-0.380073	0.204794	28.8892	28.7142	29.1805	29.5375	29.4657	28.9209
P50991;P50991-2	P50991;P50991-2	T-complex protein 1 subunit delta	CCT4	-	-	-	YES	-0.50879	0.251075	28.1901	26.2445	27.5898	27.9826	27.956	27.6122
P51114-3;P51114-2;P51114;P51116	P51114-3;P51114-2;P51114	Fragile X mental retardation syndrome-related protein 1	FXR1	-	-	-	-	0.569283	0.275326	25.561	25.5399	25.7925	24.0738	25.4341	25.6776
P51858;P51858-2;P51858-3;Q9Y3E1;O75475-3;O75475-2;O75475;Q7Z4V5-4;Q7Z4V5-3	P51858;P51858-2;P51858-3	Hepatoma-derived growth factor	HDGF	-	-	-	-	-0.2883	0.239448	27.8485	28.1254	28.1444	28.2988	28.0882	28.5962
P51991-2;P51991	P51991-2;P51991	Heterogeneous nuclear ribonucleoprotein A3	HNRNPA3	-	-	-	-	-0.444617	0.148425	26.4298	26.2103	26.6129	26.9066	26.9498	26.7305
P52209-2;P52209	P52209-2;P52209	6-phosphogluconate dehydrogenase, decarboxylating	PGD	-	-	-	YES	0.166427	0.758899	27.0438	25.285	25.0864	26.2435	25.2762	25.3963
P52272-2;P52272	P52272-2;P52272	Heterogeneous nuclear ribonucleoprotein M	HNRNPM	-	-	-	YES	0.788893	0.11772	28.277	29.1926	27.8097	27.7345	27.9363	27.2418
P52565;P52565-2	P52565;P52565-2	Rho GDP-dissociation inhibitor 1	ARHGDIA	-	-	-	YES	1.28166	0.0208509	28.3788	29.1446	28.973	26.0517	28.0446	28.5552
P52597	P52597	Heterogeneous nuclear ribonucleoprotein F;Heterogeneous nuclear ribonucleoprotein F, N-terminally processed	HNRNPF	-	-	-	-	-0.221973	0.371289	26.938	26.9915	27.3544	27.4309	27.1507	27.3682
P52788;P52788-2	P52788;P52788-2	Spermine synthase	SMS	-	-	-	YES	0.580123	0.009652	26.7033	27.0527	27.047	26.2663	26.3345	26.4618
P52823;P52823-2	P52823;P52823-2	Stanniocalcin-1	STC1	-	-	-	-	-0.295883	0.61334	27.0253	29.4337	28.5119	27.6684	28.8404	29.3498
P52888;P52888-2	P52888;P52888-2	Thimet oligopeptidase	THOP1	-	-	-	-	0.319613	0.269414	26.2095	25.6627	26.2674	26.1535	25.4791	25.5482
P52907	P52907	F-actin-capping protein subunit alpha-1	CAPZA1	-	-	-	YES	0.150073	0.532487	28.0611	28.435	28.3448	28.3481	28.018	28.0245
P53041	P53041	Serine/threonine-protein phosphatase 5	PPP5C	-	-	-	-	0.215843	0.663822	26.1164	25.4078	24.9497	24.6724	25.8155	25.3385
P53396-2;P53396;P53396-3	P53396-2;P53396;P53396-3	ATP-citrate synthase	ACLY	-	-	-	YES	0.0769133	0.913414	27.808	27.3126	27.2723	27.5592	27.4758	27.1271
P53621;P53621-2	P53621;P53621-2	Coatomer subunit alpha;Xenin;Proxenin	COPA	-	-	-	YES	0.0328133	0.919381	25.3712	25.3392	25.4023	25.6258	25.7738	24.6146
P53999	P53999	Activated RNA polymerase II transcriptional coactivator p15	SUB1	-	-	-	YES	-0.58695	0.466743	25.3519	26.2	27.0689	26.7997	26.8277	26.7542
P54136;P54136-2	P54136;P54136-2	Arginine--tRNA ligase, cytoplasmic	RARS	-	-	-	YES	-0.197203	0.489587	26.0148	26.0536	25.482	26.378	26.034	25.7298
P54578-2;P54578-3;P54578	P54578-2;P54578-3;P54578	Ubiquitin carboxyl-terminal hydrolase 14	USP14	-	-	-	YES	0.168287	0.474136	27.137	27.5861	27.0657	27.1511	26.9307	27.2022
P54727;P54727-2	P54727;P54727-2	UV excision repair protein RAD23 homolog B	RAD23B	-	-	-	-	-1.13138	0.273228	28.1595	23.5887	26.9627	27.7366	27.329	27.0394
P54819-5;P54819-2;P54819;P54819-3;P54819-6;P54819-4	P54819-5;P54819-2;P54819;P54819-3;P54819-6	Adenylate kinase 2, mitochondrial;Adenylate kinase 2, mitochondrial, N-terminally processed	AK2	-	-	-	YES	-0.177537	0.533561	25.7002	26.0158	26.082	26.511	25.956	25.8635
P55036;P55036-2	P55036	26S proteasome non-ATPase regulatory subunit 4	PSMD4	-	-	-	-	-0.387867	0.384655	26.8713	25.7415	26.9373	26.6835	27.0443	26.9859
P55060-3;P55060;P55060-4;P55060-2	P55060-3;P55060;P55060-4;P55060-2	Exportin-2	CSE1L	-	-	-	YES	0.0736067	0.796853	28.0444	27.3017	27.7788	28.0082	27.5696	27.3263
P55072	P55072	Transitional endoplasmic reticulum ATPase	VCP	-	-	-	YES	-0.05056	0.835936	30.6596	29.9331	30.51	30.5257	30.4093	30.3194
P55209-2;P55209;P55209-3	P55209-2;P55209;P55209-3	Nucleosome assembly protein 1-like 1	NAP1L1	-	-	-	-	-0.491	0.140787	29.696	29.5923	30.039	30.3178	30.1797	30.3029
P55268	P55268	Laminin subunit beta-2	LAMB2	YES	Core matrisome	ECM Glycoproteins	YES	-1.3939	0.00233297	27.7618	27.5486	27.964	29.1055	29.1432	29.2074
P55786;P55786-2;A6NEC2;A6NEC2-3;A6NEC2-2	P55786;P55786-2	Puromycin-sensitive aminopeptidase	NPEPPS	-	-	-	YES	0.310633	0.145819	27.1837	26.9381	27.4184	26.8411	26.9579	26.8092
P55795	P55795	Heterogeneous nuclear ribonucleoprotein H2	HNRNPH2	-	-	-	-	-0.13713	0.846186	25.5124	23.8418	24.8895	24.1988	25.4721	24.9842
P55884;P55884-2	P55884;P55884-2	Eukaryotic translation initiation factor 3 subunit B	EIF3B	-	-	-	YES	-0.344783	0.237284	28.1615	27.6184	28.3821	28.5159	28.4884	28.1921
P56537;P56537-2	P56537;P56537-2	Eukaryotic translation initiation factor 6	EIF6	-	-	-	YES	-0.141673	0.627989	29.7489	28.8454	30.1658	29.6378	29.7052	29.842
P59998;P59998-2;P59998-3;P59998-4	P59998;P59998-2;P59998-3	Actin-related protein 2/3 complex subunit 4	ARPC4	-	-	-	YES	-0.381967	0.544599	26.1498	24.8462	25.1693	26.5082	25.6185	25.1843
P60174-1;P60174;P60174-4	P60174-1;P60174;P60174-4	Triosephosphate isomerase	TPI1	-	-	-	YES	0.228953	0.316052	30.0299	30.8343	30.141	30.1121	30.1058	30.1005
P60660-2;P60660;P14649	P60660-2;P60660	Myosin light polypeptide 6	MYL6	-	-	-	YES	0.60916	0.00856868	30.0148	30.6211	30.3651	29.7288	29.743	29.7018
P60842;P60842-2	P60842;P60842-2	Eukaryotic initiation factor 4A-I	EIF4A1	-	-	-	YES	-0.442103	0.23835	30.902	29.3726	30.6904	31.1699	30.793	30.3285
P60866;P60866-2	P60866;P60866-2	40S ribosomal protein S20	RPS20	-	-	-	YES	1.2248	0.0196152	25.604	26.8341	24.8764	23.9695	25.0379	24.6328
P60900;P60900-2;P60900-3	P60900;P60900-2	Proteasome subunit alpha type-6	PSMA6	-	-	-	YES	0.06067	0.787845	28.498	28.572	28.4677	28.5116	28.4573	28.3866
P61086-2;P61086;P61086-3	P61086-2;P61086	Ubiquitin-conjugating enzyme E2 K	UBE2K	-	-	-	-	-0.4111	0.437887	25.9853	26.5338	24.087	26.1226	26.0149	25.7019
P61088;Q5JXB2	P61088;Q5JXB2	Ubiquitin-conjugating enzyme E2 N;Putative ubiquitin-conjugating enzyme E2 N-like	UBE2N;UBE2NL	-	-	-	-	0.03374	0.93371	26.9672	27.6846	27.3218	27.4935	27.5526	26.8263
P61158;Q9P1U1-2;Q9P1U1;Q9P1U1-3;Q9C0K3	P61158	Actin-related protein 3	ACTR3	-	-	-	YES	-0.1957	0.384152	28.7823	28.2047	28.2533	28.7794	28.5523	28.4956
P61160;P61160-2	P61160;P61160-2	Actin-related protein 2	ACTR2	-	-	-	YES	-0.76573	0.0330875	27.044	25.392	26.5274	26.9618	27.1997	27.0991
P61247	P61247	40S ribosomal protein S3a	RPS3A	-	-	-	YES	-0.00771667	0.978322	26.3837	27.1734	26.7854	27.0074	26.8235	26.5348
P61254;Q9UNX3	P61254;Q9UNX3	60S ribosomal protein L26;60S ribosomal protein L26-like 1	RPL26;RPL26L1	-	-	-	-	0.703017	0.242202	24.6349	25.0692	26.489	24.0972	24.6228	25.364
P61289;P61289-3;P61289-2	P61289;P61289-3;P61289-2	Proteasome activator complex subunit 3	PSME3	-	-	-	-	-0.0926067	0.716889	26.8186	27.0152	26.9875	27.2323	26.8745	26.9923
P61313;P61313-2	P61313;P61313-2	60S ribosomal protein L15	RPL15	-	-	-	-	0.0432267	0.938204	26.5146	26.1437	26.8971	26.8673	26.0426	26.5159
P61457	P61457	Pterin-4-alpha-carbinolamine dehydratase	PCBD1	-	-	-	YES	1.52457	0.000219139	27.2488	26.6697	27.4745	26.0821	25.7741	24.963
P61769	P61769	Beta-2-microglobulin;Beta-2-microglobulin form pI 5.3	B2M	-	-	-	YES	-0.15441	0.756195	29.0898	29.2233	29.7313	28.7184	30.004	29.7853
P61970	P61970	Nuclear transport factor 2	NUTF2	-	-	-	YES	0.32473	0.2591	27.8956	27.3221	28.0195	27.6816	27.3857	27.1957
P61978-2;P61978	P61978-2;P61978	Heterogeneous nuclear ribonucleoprotein K	HNRNPK	-	-	-	YES	-0.438143	0.0783284	29.933	29.4448	30.0322	30.2539	30.206	30.2645
P61981	P61981	14-3-3 protein gamma;14-3-3 protein gamma, N-terminally processed	YWHAG	-	-	-	YES	0.340827	0.140085	29.6538	29.5385	29.8121	29.2216	29.2077	29.5526
P62081	P62081	40S ribosomal protein S7	RPS7	-	-	-	-	1.14064	0.0205361	25.9701	27.0963	26.4327	25.4219	25.0518	25.6034
P62136;P62136-2;P62136-3	P62136;P62136-2;P62136-3	Serine/threonine-protein phosphatase PP1-alpha catalytic subunit	PPP1CA	-	-	-	YES	0.478597	0.434162	27.0323	27.055	27.0903	26.9053	26.7718	26.0648
P62191;P62191-2	P62191;P62191-2	26S protease regulatory subunit 4	PSMC1	-	-	-	-	0.280427	0.264321	26.0105	26.3833	25.8918	25.6235	26.0477	25.773
P62195;P62195-2	P62195;P62195-2	26S protease regulatory subunit 8	PSMC5	-	-	-	YES	-0.14481	0.677772	26.2396	25.4155	26.1429	26.3113	26.1186	25.8025
P62241	P62241	40S ribosomal protein S8	RPS8	-	-	-	YES	0.02133	0.943856	26.9556	27.5103	27.7038	27.1756	27.2296	27.7005
P62258;P62258-2	P62258;P62258-2	14-3-3 protein epsilon	YWHAE	-	-	-	YES	0.05289	0.821732	31.48	31.5995	31.8517	31.4175	31.5704	31.7847
P62280	P62280	40S ribosomal protein S11	RPS11	-	-	-	YES	-0.0770867	0.733135	25.4529	25.988	25.682	25.8535	25.5582	25.9425
P62310	P62310	U6 snRNA-associated Sm-like protein LSm3	LSM3	-	-	-	-	0.01581	0.943595	27.5102	27.6632	27.4824	27.7724	27.4138	27.4222
P62314	P62314	Small nuclear ribonucleoprotein Sm D1	SNRPD1	-	-	-	-	0.390947	0.62183	25.6366	26.4375	24.965	24.9456	26.307	24.6137
P62318-2;P62318	P62318-2;P62318	Small nuclear ribonucleoprotein Sm D3	SNRPD3	-	-	-	-	-1.14633	0.177925	27.4164	28.256	23.6963	27.7148	27.5977	27.4953
P62333	P62333	26S protease regulatory subunit 10B	PSMC6	-	-	-	YES	0.114997	0.854719	27.1389	27.0733	26.7642	27.0654	26.9575	26.6085
P62491-2;Q15907-2;P62491;Q15907;P57735	P62491-2;Q15907-2;P62491;Q15907	Ras-related protein Rab-11A;Ras-related protein Rab-11B	RAB11A;RAB11B	-	-	-	-	0.90182	0.121921	26.0827	24.8822	26.1143	23.3967	25.4931	25.484
P62495;P62495-2	P62495;P62495-2	Eukaryotic peptide chain release factor subunit 1	ETF1	-	-	-	-	-0.259277	0.34585	25.275	25.471	25.3355	25.8451	25.5368	25.4774
P62750	P62750	60S ribosomal protein L23a	RPL23A	-	-	-	YES	-0.47208	0.2914	25.8665	26.3086	24.0266	25.7129	26.0789	25.8261
P62753	P62753	40S ribosomal protein S6	RPS6	-	-	-	-	-0.0644733	0.809149	25.6257	26.1841	26.5693	26.3132	26.0571	26.2022
P62826	P62826	GTP-binding nuclear protein Ran	RAN	-	-	-	YES	1.68834	0.00497825	26.5876	27.1636	26.441	23.9346	26.2192	24.9734
P62851	P62851	40S ribosomal protein S25	RPS25	-	-	-	YES	0.64951	0.215613	25.1027	26.3525	25.5291	25.1532	24.9353	24.9472
P62906	P62906	60S ribosomal protein L10a	RPL10A	-	-	-	YES	-0.24132	0.527271	27.3449	28.1541	27.2323	28.1412	28.0636	27.2505
P62937;P62937-2;P0DN26;A0A0B4J2A2;A0A075B759;Q9Y536;F5H284;P0DN37;O43447-2	P62937;P62937-2	Peptidyl-prolyl cis-trans isomerase A;Peptidyl-prolyl cis-trans isomerase A, N-terminally processed	PPIA	-	-	-	YES	0.254257	0.500988	31.3259	31.1933	30.6869	30.8474	31.2908	30.3051
P62993;P62993-2	P62993;P62993-2	Growth factor receptor-bound protein 2	GRB2	-	-	-	YES	-0.148533	0.657363	26.8271	25.7848	26.8329	26.6693	26.9024	26.3187
P63104;P63104-2	P63104;P63104-2	14-3-3 protein zeta/delta	YWHAZ	-	-	-	YES	-0.263633	0.306548	32.8182	32.3523	33.2437	32.9719	33.0257	33.2075
P63208;P63208-2	P63208;P63208-2	S-phase kinase-associated protein 1	SKP1	-	-	-	-	-0.50988	0.507708	27.3994	26.5263	27.2611	27.626	27.3444	27.746
P63220	P63220	40S ribosomal protein S21	RPS21	-	-	-	-	0.539	0.164747	27.5667	28.4979	27.0658	27.1151	27.6013	26.797
P63241;P63241-2;Q6IS14;Q9GZV4	P63241;P63241-2;Q6IS14	Eukaryotic translation initiation factor 5A-1;Eukaryotic translation initiation factor 5A-1-like	EIF5A;EIF5AL1	-	-	-	-	0.53495	0.273114	28.8978	28.9706	29.1102	28.6536	28.745	27.9751
P63244	P63244	Guanine nucleotide-binding protein subunit beta-2-like 1;Guanine nucleotide-binding protein subunit beta-2-like 1, N-terminally processed	GNB2L1	-	-	-	-	0.128263	0.721254	28.7241	27.8454	27.9078	28.222	28.373	27.4975
P63261	P63261	Actin, cytoplasmic 2;Actin, cytoplasmic 2, N-terminally processed	ACTG1	-	-	-	YES	0.499783	0.0207017	34.9238	34.9295	34.9709	34.2409	34.3499	34.7339
P67775;P62714;P67775-2	P67775;P62714;P67775-2	Serine/threonine-protein phosphatase 2A catalytic subunit alpha isoform;Serine/threonine-protein phosphatase 2A catalytic subunit beta isoform	PPP2CA;PPP2CB	-	-	-	-	1.0524	0.0466356	26.5413	26.5905	25.5881	23.8226	26.0831	25.657
P67809;Q9Y2T7	P67809	Nuclease-sensitive element-binding protein 1	YBX1	-	-	-	YES	0.03547	0.897188	28.0489	27.9443	28.5256	27.6659	28.3269	28.4196
P67936	P67936	Tropomyosin alpha-4 chain	TPM4	-	-	-	YES	-0.0920867	0.734632	29.1222	29.9365	29.6578	29.3535	29.6798	29.9595
P68133;P68032;P63267;P62736	P68133;P68032;P63267;P62736	Actin, alpha skeletal muscle;Actin, alpha cardiac muscle 1;Actin, gamma-enteric smooth muscle;Actin, aortic smooth muscle	ACTA1;ACTC1;ACTG2;ACTA2	-	-	-	-	0.880293	0.486015	28.1334	31.2566	28.0979	27.9201	28.2463	28.6806
Q5VTE0;P68104;P68104-2	Q5VTE0;P68104;P68104-2	Putative elongation factor 1-alpha-like 3;Elongation factor 1-alpha 1	EEF1A1P5;EEF1A1	-	-	-	-	-0.11746	0.680633	31.3131	31.2046	30.9664	31.6926	31.202	30.9418
P68363;P68363-2;A6NHL2-2;A6NHL2;Q9H853	P68363;P68363-2	Tubulin alpha-1B chain	TUBA1B	-	-	-	-	0.264483	0.34686	32.4803	31.7949	32.5569	32.1943	31.9702	31.8741
P68371;P04350	P68371;P04350	Tubulin beta-4B chain;Tubulin beta-4A chain	TUBB4B;TUBB4A	-	-	-	-	0.417547	0.119222	31.9833	31.6781	31.8348	31.6066	31.3672	31.2697
Q8NEV1;P68400;P68400-2	Q8NEV1;P68400;P68400-2	Casein kinase II subunit alpha 3;Casein kinase II subunit alpha	CSNK2A3;CSNK2A1	-	-	-	-	0.20094	0.595799	25.6045	25.3377	25.9864	25.5746	25.753	24.9982
Q71DI3;P84243;P68431;Q6NXT2;Q16695	Q71DI3;P84243;P68431;Q6NXT2;Q16695	Histone H3.2;Histone H3.3;Histone H3.1;Histone H3.3C;Histone H3.1t	HIST2H3A;H3F3A;HIST1H3A;H3F3C;HIST3H3	-	-	-	-	-1.04884	0.270509	25.0368	22.5621	26.5823	24.3385	25.6192	27.3701
P78371;P78371-2	P78371;P78371-2	T-complex protein 1 subunit beta	CCT2	-	-	-	YES	-0.148393	0.595888	29.1073	28.8806	29.1537	29.4257	29.1217	29.0395
P78406	P78406	mRNA export factor	RAE1	-	-	-	-	0.07792	0.889168	24.8989	25.2737	24.613	24.5465	24.9885	25.0168
P78417;P78417-2;P78417-3	P78417;P78417-2;P78417-3	Glutathione S-transferase omega-1	GSTO1	-	-	-	YES	0.0201467	0.967915	26.8867	26.4539	26.9504	26.8158	27.1716	26.2431
P78536-2;P78536	P78536-2;P78536	Disintegrin and metalloproteinase domain-containing protein 17	ADAM17	YES	Matrisome-associated	ECM Regulators	-	-0.00556	0.990909	26.1541	25.2655	27.3199	25.991	25.9973	26.768
P80303-2;P80303	P80303-2;P80303	Nucleobindin-2;Nesfatin-1	NUCB2	-	-	-	YES	0.14864	0.539457	27.1575	27.5321	27.553	27.2695	27.0654	27.4618
P80723;P80723-2	P80723;P80723-2	Brain acid soluble protein 1	BASP1	-	-	-	YES	0.160937	0.668329	26.4342	26.1853	27.1953	25.586	26.6125	27.1335
P81605;P81605-2	P81605;P81605-2	Dermcidin;Survival-promoting peptide;DCD-1	DCD	-	-	-	YES	0.736503	0.531765	27.3796	28.63	29.4505	25.2862	27.9398	30.0246
P82979	P82979	SAP domain-containing ribonucleoprotein	SARNP	-	-	-	-	0.0480033	0.895956	26.0137	26.248	25.9426	26.3047	25.8651	25.8906
P84090	P84090	Enhancer of rudimentary homolog	ERH	-	-	-	-	0.158593	0.679202	26.7839	27.0859	27.087	26.5905	26.9905	26.9
P84098	P84098	60S ribosomal protein L19	RPL19	-	-	-	-	0.24232	0.637942	25.3666	26.0925	26.1819	25.5387	25.4926	25.8827
P84103-2;P84103	P84103-2;P84103	Serine/arginine-rich splicing factor 3	SRSF3	-	-	-	-	0.212907	0.733521	28.2077	27.2555	27.8333	27.8915	27.8736	26.8926
P98160	P98160	Basement membrane-specific heparan sulfate proteoglycan core protein;Endorepellin;LG3 peptide	HSPG2	YES	Core matrisome	Proteoglycans	YES	-0.42789	0.174105	29.863	29.8737	29.388	30.2848	30.3237	29.7999
P98179	P98179	RNA-binding protein 3	RBM3	-	-	-	-	1.20455	0.00199535	26.626	26.7497	26.9327	25.6332	25.8333	25.2283
Q00610-2;Q00610;P53675-2;P53675	Q00610-2;Q00610	Clathrin heavy chain 1	CLTC	-	-	-	YES	0.0296867	0.927377	30.3112	29.3658	29.9106	30.2231	29.8797	29.3956
Q00688	Q00688	Peptidyl-prolyl cis-trans isomerase FKBP3	FKBP3	-	-	-	-	-1.52118	0.0336038	26.0571	22.5791	25.5655	26.6501	26.226	25.8891
Q00839-2;Q00839	Q00839-2;Q00839	Heterogeneous nuclear ribonucleoprotein U	HNRNPU	-	-	-	-	0.555727	0.094733	27.1712	28.2727	27.2915	26.9001	27.2135	26.9547
Q01082;Q01082-3;Q01082-2;P11277-3;P11277;P11277-2;O15020-2;O15020	Q01082;Q01082-3;Q01082-2	Spectrin beta chain, non-erythrocytic 1	SPTBN1	-	-	-	YES	-0.432593	0.103325	29.4864	29.3173	29.4127	29.9622	29.8666	29.6853
Q01105-2;Q01105-3;Q01105-4;P0DME0	Q01105-2;Q01105-3;Q01105-4;P0DME0	Protein SET;Protein SETSIP	SET;SETSIP	-	-	-	-	0.2769	0.298995	29.2223	29.1534	30.0197	29.1214	28.9678	29.4755
Q01130-2;Q01130;Q9BRL6-2;Q9BRL6	Q01130-2;Q01130	Serine/arginine-rich splicing factor 2	SRSF2	-	-	-	-	-2.20864	0.0517282	28.2915	22.8645	27.8449	28.5914	28.5761	28.4592
Q01518;Q01518-2	Q01518;Q01518-2	Adenylyl cyclase-associated protein 1	CAP1	-	-	-	YES	0.0167633	0.958845	28.6816	29.4047	29.1521	28.9262	29.1831	29.0788
Q02790	Q02790	Peptidyl-prolyl cis-trans isomerase FKBP4;Peptidyl-prolyl cis-trans isomerase FKBP4, N-terminally processed	FKBP4	-	-	-	YES	-0.09343	0.660132	27.9749	27.6945	28.1642	28.0121	28.096	28.0058
Q02809;Q02809-2	Q02809;Q02809-2	Procollagen-lysine,2-oxoglutarate 5-dioxygenase 1	PLOD1	YES	Matrisome-associated	ECM Regulators	YES	1.33357	0.0460383	27.5807	26.3066	26.9904	26.5463	26.2406	24.0901
Q02818	Q02818	Nucleobindin-1	NUCB1	-	-	-	YES	0.446037	0.087462	30.3395	30.5477	30.948	29.9664	30.0596	30.4711
Q02878	Q02878	60S ribosomal protein L6	RPL6	-	-	-	-	0.47491	0.340295	26.3304	25.8743	26.6436	25.5894	25.8735	25.9607
Q03252	Q03252	Lamin-B2	LMNB2	-	-	-	-	0.959383	0.00893467	27.4023	28.1619	27.6682	26.5912	26.9651	26.7979
Q04323;Q04323-2	Q04323;Q04323-2	UBX domain-containing protein 1	UBXN1	-	-	-	-	-0.162303	0.67337	26.0616	24.7926	25.8997	25.9208	26.0769	25.2432
Q04446	Q04446	1,4-alpha-glucan-branching enzyme	GBE1	-	-	-	YES	-0.685953	0.0877452	27.5318	26.1952	27.5828	27.7199	28.3762	27.2715
Q04760-2;Q04760	Q04760-2;Q04760	Lactoylglutathione lyase	GLO1	-	-	-	YES	0.0694467	0.753778	28.9981	29.2243	29.1634	29.1183	29.04	29.0191
Q04837	Q04837	Single-stranded DNA-binding protein, mitochondrial	SSBP1	-	-	-	YES	1.39846	0.0887536	25.7369	27.2533	26.7057	26	25.4147	24.0858
Q04917	Q04917	14-3-3 protein eta	YWHAH	-	-	-	YES	0.28617	0.255192	27.9715	28.5559	28.4315	27.9354	28.042	28.1231
Q05048	Q05048	Cleavage stimulation factor subunit 1	CSTF1	-	-	-	-	-0.0247733	0.944659	24.6303	24.469	25.1029	24.4978	25.1439	24.6348
Q06124-2;Q06124;Q06124-3	Q06124-2;Q06124;Q06124-3	Tyrosine-protein phosphatase non-receptor type 11	PTPN11	-	-	-	-	-0.529583	0.0363417	26.0015	26.3913	26.4211	26.8209	26.6942	26.8875
Q06210-2;Q06210;O94808	Q06210-2;Q06210	Glutamine--fructose-6-phosphate aminotransferase [isomerizing] 1	GFPT1	-	-	-	YES	-0.12024	0.845054	25.3774	22.9517	25.0484	24.8091	24.3953	24.5339
Q06323;Q06323-3;Q06323-2	Q06323;Q06323-3;Q06323-2	Proteasome activator complex subunit 1	PSME1	-	-	-	YES	0.24654	0.558215	28.6134	27.133	28.6046	28.1115	27.734	27.7659
Q06481;Q06481-2;Q06481-3;Q06481-6;Q06481-4;Q06481-5	Q06481;Q06481-2;Q06481-3;Q06481-6;Q06481-4;Q06481-5	Amyloid-like protein 2	APLP2	-	-	-	YES	-0.199243	0.574021	30.1084	30.5869	30.7399	30.4688	30.5613	31.0028
Q06830	Q06830	Peroxiredoxin-1	PRDX1	-	-	-	YES	-0.58732	0.031681	31.0733	30.8827	30.9239	31.6771	31.5993	31.3656
Q07021	Q07021	Complement component 1 Q subcomponent-binding protein, mitochondrial	C1QBP	-	-	-	-	-0.29261	0.628654	27.0973	25.8754	27.0173	27.2477	26.9111	26.709
Q07666-3;Q07666-2;Q07666;O75525-2;O75525;Q5VWX1	Q07666-3;Q07666-2;Q07666	KH domain-containing, RNA-binding, signal transduction-associated protein 1	KHDRBS1	-	-	-	-	0.0982867	0.78327	26.7749	26.8551	25.9697	26.6465	26.6345	26.0239
Q07954	Q07954	Prolow-density lipoprotein receptor-related protein 1;Low-density lipoprotein receptor-related protein 1 85 kDa subunit;Low-density lipoprotein receptor-related protein 1 515 kDa subunit;Low-density lipoprotein receptor-related protein 1 intracellular domain	LRP1	-	-	-	-	-0.0879567	0.824659	24.5811	25.1352	24.7803	24.9382	24.1359	25.6863
Q07955;Q07955-3;Q07955-2	Q07955;Q07955-3;Q07955-2	Serine/arginine-rich splicing factor 1	SRSF1	-	-	-	-	-0.9222	0.0702553	28.4383	26.4638	28.5971	28.4757	29.0118	28.7782
Q08380	Q08380	Galectin-3-binding protein	LGALS3BP	-	-	-	YES	-0.296637	0.203175	33.802	33.1614	33.6568	33.8097	33.9615	33.739
Q08945	Q08945	FACT complex subunit SSRP1	SSRP1	-	-	-	-	0.440973	0.371965	25.4306	25.4449	25.2736	25.6084	25.4425	23.7753
Q09666;Q09666-2	Q09666	Neuroblast differentiation-associated protein AHNAK	AHNAK	-	-	-	YES	0.630893	0.337932	27.9514	28.4755	27.9887	27.3322	27.647	27.5438
Q10567-4;Q10567-3;Q10567-2;Q10567	Q10567-4;Q10567-3;Q10567-2;Q10567	AP-1 complex subunit beta-1	AP1B1	-	-	-	-	-0.02229	0.96521	26.1737	24.5853	26.2007	25.8461	25.7634	25.417
Q12765-3;Q12765;Q12765-2	Q12765-3;Q12765;Q12765-2	Secernin-1	SCRN1	-	-	-	-	0.308423	0.380946	26.8179	28.1741	27.5259	26.8448	27.3162	27.4316
Q12792;Q12792-4;Q12792-3	Q12792;Q12792-4;Q12792-3	Twinfilin-1	TWF1	-	-	-	-	0.01975	0.949106	26.1107	26.1474	26.1827	25.9988	26.0763	26.3064
Q12805-5;Q12805-2;Q12805-4;Q12805-3;Q12805	Q12805-5;Q12805-2;Q12805-4;Q12805-3;Q12805	EGF-containing fibulin-like extracellular matrix protein 1	EFEMP1	YES	Core matrisome	ECM Glycoproteins	YES	1.61355	0.00778773	29.9839	30.2588	30.3161	28.6785	28.0889	28.9507
Q12874	Q12874	Splicing factor 3A subunit 3	SF3A3	-	-	-	-	-0.773657	0.136507	26.461	24.8745	25.958	26.6831	26.6259	26.3055
Q12906;Q12906-7;Q12906-5;Q12906-4;Q12906-2;Q12906-6;Q12906-3;Q96SI9-2;Q96SI9	Q12906;Q12906-7;Q12906-5;Q12906-4;Q12906-2;Q12906-6;Q12906-3	Interleukin enhancer-binding factor 3	ILF3	-	-	-	-	-0.704703	0.029537	27.034	27.0548	26.711	27.7565	27.5227	27.6346
Q12907	Q12907	Vesicular integral-membrane protein VIP36	LMAN2	-	-	-	YES	0.87684	0.0832849	26.6608	26.4202	27.1916	25.1497	25.9501	26.5424
Q13162	Q13162	Peroxiredoxin-4	PRDX4	-	-	-	YES	0.209177	0.46709	27.3477	26.6249	27.6968	27.1843	26.8815	26.9762
Q13177;O75914-2;Q13153;Q13153-2;O75914;O75914-4;O75914-3	Q13177;O75914-2;Q13153;Q13153-2;O75914;O75914-4;O75914-3	Serine/threonine-protein kinase PAK 2;PAK-2p27;PAK-2p34;Serine/threonine-protein kinase PAK 3;Serine/threonine-protein kinase PAK 1	PAK2;PAK3;PAK1	-	-	-	-	0.740947	0.0522592	25.8734	26.219	26.0984	25.4526	25.2897	25.2256
Q13185	Q13185	Chromobox protein homolog 3	CBX3	-	-	-	-	-0.587963	0.0546373	28.3505	27.5734	28.1428	28.8065	28.5765	28.4477
Q13200;Q13200-3;Q13200-2	Q13200;Q13200-3;Q13200-2	26S proteasome non-ATPase regulatory subunit 2	PSMD2	-	-	-	YES	-0.222017	0.518639	28.1943	27.6301	27.776	28.4569	27.982	27.8276
Q13247-3;Q13247;Q13247-2;Q08170	Q13247-3;Q13247	Serine/arginine-rich splicing factor 6	SRSF6	-	-	-	-	-0.34069	0.247255	27.822	27.5573	28.5958	27.974	28.5778	28.4454
Q13263;Q13263-2	Q13263;Q13263-2	Transcription intermediary factor 1-beta	TRIM28	-	-	-	-	0.12513	0.646283	27.1111	27.3259	27.0933	27.2133	27.0813	26.8603
Q13283;Q13283-2	Q13283	Ras GTPase-activating protein-binding protein 1	G3BP1	-	-	-	-	-0.25683	0.259487	27.0628	27.1974	26.9834	27.5437	27.1147	27.3557
Q13308-5;Q13308-4;Q13308;Q13308-6;Q13308-2;Q13308-3	Q13308-5;Q13308-4;Q13308;Q13308-6;Q13308-2;Q13308-3	Inactive tyrosine-protein kinase 7	PTK7	-	-	-	-	-1.604	0.000174651	25.7876	26.9458	25.9742	27.7874	27.7117	28.0206
Q13347	Q13347	Eukaryotic translation initiation factor 3 subunit I	EIF3I	-	-	-	YES	0.0167167	0.949946	27.4113	28.1464	27.6328	27.8795	27.5935	27.6673
Q13404;Q13404-7;Q13404-1;Q13404-2;Q13404-8;Q13404-6	Q13404;Q13404-7;Q13404-1;Q13404-2;Q13404-8;Q13404-6	Ubiquitin-conjugating enzyme E2 variant 1	UBE2V1	-	-	-	YES	0.418977	0.430882	26.4397	26.828	26.9033	26.3361	25.9585	26.6195
Q13409-6;Q13409-3;Q13409-2;Q13409-7;Q13409-5;Q13409	Q13409-6;Q13409-3;Q13409-2;Q13409-7;Q13409-5;Q13409	Cytoplasmic dynein 1 intermediate chain 2	DYNC1I2	-	-	-	-	-0.217563	0.470662	25.9516	26.846	26.4861	26.4448	26.4826	27.0089
Q13435	Q13435	Splicing factor 3B subunit 2	SF3B2	-	-	-	-	-0.00601333	0.987277	25.2322	25.0753	25.9703	25.7497	25.3881	25.1581
Q13561;Q13561-3;Q13561-2	Q13561;Q13561-3;Q13561-2	Dynactin subunit 2	DCTN2	-	-	-	YES	0.11707	0.617829	26.2027	26.6147	26.4283	26.4573	26.3791	26.0581
Q13740-2;Q13740;Q13740-3;Q13740-4	Q13740-2;Q13740	CD166 antigen	ALCAM	-	-	-	YES	-0.359987	0.2166	28.6528	29.2664	28.8751	29.3826	29.1625	29.3291
Q13813-3;Q13813;Q13813-2	Q13813-3;Q13813;Q13813-2	Spectrin alpha chain, non-erythrocytic 1	SPTAN1	-	-	-	YES	0.203197	0.314356	29.9501	30.2909	30.0666	29.953	29.8598	29.8852
Q13838;Q13838-2	Q13838;Q13838-2	Spliceosome RNA helicase DDX39B	DDX39B	-	-	-	-	0.233563	0.432647	28.8127	28.0828	28.6175	28.5129	28.4612	27.8382
Q14019	Q14019	Coactosin-like protein	COTL1	-	-	-	YES	0.43969	0.451351	26.1621	27.3063	26.6533	26.2608	26.319	26.2228
Q14103-3;Q14103;Q14103-4;Q14103-2	Q14103-3;Q14103;Q14103-4;Q14103-2	Heterogeneous nuclear ribonucleoprotein D0	HNRNPD	-	-	-	-	-0.2109	0.636933	28.6691	28.7802	28.8121	28.2311	29.1391	29.5241
Q14118	Q14118	Dystroglycan;Alpha-dystroglycan;Beta-dystroglycan	DAG1	-	-	-	YES	-0.293333	0.2578	30.2422	30.3052	30.7487	30.5471	30.5407	31.0882
Q14152;Q14152-2	Q14152;Q14152-2	Eukaryotic translation initiation factor 3 subunit A	EIF3A	-	-	-	-	-0.392877	0.342243	27.9395	27.5798	27.9606	28.3495	28.465	27.8439
Q14204	Q14204	Cytoplasmic dynein 1 heavy chain 1	DYNC1H1	-	-	-	YES	-0.84681	0.0177485	27.2501	26.1086	26.344	27.5184	27.5998	27.1248
Q14247-3;Q14247;Q14247-2	Q14247-3;Q14247;Q14247-2	Src substrate cortactin	CTTN	-	-	-	-	0.279957	0.7136	26.3645	26.0451	27.0901	26.1402	26.2076	26.312
Q14444-2;Q14444	Q14444-2;Q14444	Caprin-1	CAPRIN1	-	-	-	-	-0.87343	0.084423	25.9407	25.2584	26.2166	26.5123	26.7898	26.7339
Q14566	Q14566	DNA replication licensing factor MCM6	MCM6	-	-	-	-	0.7277	0.129042	26.9361	26.7714	26.7486	26.3797	25.8977	25.9955
Q14696;Q14696-2	Q14696	LDLR chaperone MESD	MESDC2	-	-	-	-	-0.132283	0.880659	24.8785	24.1261	25.703	24.2423	25.4507	25.4115
Q14697;Q14697-2	Q14697;Q14697-2	Neutral alpha-glucosidase AB	GANAB	-	-	-	YES	0.132537	0.885059	29.6836	27.9073	29.1031	29.0047	29.0943	28.1975
Q14764	Q14764	Major vault protein	MVP	-	-	-	YES	1.33424	0.000469056	26.945	27.1122	27.3528	25.8926	25.7838	25.7308
Q14847;Q14847-2;Q14847-3	Q14847;Q14847-2;Q14847-3	LIM and SH3 domain protein 1	LASP1	-	-	-	-	-0.00994	0.971204	28.8461	28.7771	28.601	28.8234	28.946	28.4847
Q14974;Q14974-2	Q14974;Q14974-2	Importin subunit beta-1	KPNB1	-	-	-	YES	0.36603	0.16784	29.8446	29.7512	30.0376	29.6675	29.4902	29.3776
Q15008;Q15008-4;Q15008-3;Q15008-2	Q15008;Q15008-4;Q15008-3;Q15008-2	26S proteasome non-ATPase regulatory subunit 6	PSMD6	-	-	-	-	-0.51265	0.416098	25.3883	23.501	25.7544	25.6941	25.0671	25.4204
Q15019;Q15019-3;Q15019-2	Q15019;Q15019-3;Q15019-2	Septin-2	SEPT2	-	-	-	YES	0.30586	0.369637	27.4218	27.7573	27.5478	27.3285	27.4264	27.0544
Q15020-4;Q15020;Q15020-3;Q15020-2	Q15020-4;Q15020;Q15020-3;Q15020-2	Squamous cell carcinoma antigen recognized by T-cells 3	SART3	-	-	-	-	0.3582	0.504513	22.9897	23.5643	24.0848	23.0047	23.317	23.2425
Q15029-2;Q15029-3;Q15029	Q15029-2;Q15029-3;Q15029	116 kDa U5 small nuclear ribonucleoprotein component	EFTUD2	-	-	-	-	0.20801	0.624891	26.0257	25.7628	25.4748	25.5264	25.6709	25.442
Q15046;Q15046-2	Q15046;Q15046-2	Lysine--tRNA ligase	KARS	-	-	-	-	-1.02649	0.000662234	25.9495	25.6779	25.3846	26.7461	26.5531	26.7923
Q15056-2;Q15056	Q15056-2;Q15056	Eukaryotic translation initiation factor 4H	EIF4H	-	-	-	-	0.76617	0.024494	27.8176	28.1585	27.909	27.3249	27.4501	26.8115
Q15084-3;Q15084;Q15084-4;Q15084-5;Q15084-2	Q15084-3;Q15084;Q15084-4;Q15084-5;Q15084-2	Protein disulfide-isomerase A6	PDIA6	-	-	-	YES	0.14782	0.510303	28.8222	28.5001	28.8879	28.6964	28.5791	28.4912
Q15102	Q15102	Platelet-activating factor acetylhydrolase IB subunit gamma	PAFAH1B3	-	-	-	-	0.229967	0.634576	25.856	25.4787	25.61	25.9476	25.4504	24.8568
Q15121;Q15121-2	Q15121;Q15121-2	Astrocytic phosphoprotein PEA-15	PEA15	-	-	-	-	0.32595	0.578272	28.1277	27.4282	28.2886	27.7667	27.6084	27.4914
Q15149-7;Q15149-8;Q15149-9;Q15149-5;Q15149-4;Q15149-6;Q15149-3;Q15149-2;Q15149	Q15149-7;Q15149-8;Q15149-9;Q15149-5;Q15149-4;Q15149-6;Q15149-3;Q15149-2;Q15149	Plectin	PLEC	-	-	-	YES	-0.219557	0.550967	30.6826	30.692	30.2451	30.7826	30.837	30.6587
Q15181	Q15181	Inorganic pyrophosphatase	PPA1	-	-	-	YES	0.367937	0.142165	28.2663	28.5918	28.8666	28.3496	28.047	28.2244
Q15185-4;Q15185;Q15185-3;Q15185-2	Q15185-4;Q15185;Q15185-3	Prostaglandin E synthase 3	PTGES3	-	-	-	-	-0.323723	0.542001	26.6667	28.0889	27.6584	28.2825	27.7808	27.3219
Q15233;Q15233-2	Q15233;Q15233-2	Non-POU domain-containing octamer-binding protein	NONO	-	-	-	-	-0.22745	0.645516	27.9696	26.6469	27.5993	28.103	27.6375	27.1576
Q15262-2;Q15262-3;Q15262-4;Q15262	Q15262-2;Q15262-3;Q15262-4;Q15262	Receptor-type tyrosine-protein phosphatase kappa	PTPRK	-	-	-	-	0.645263	0.0106201	27.2709	27.0605	27.4928	26.602	26.8365	26.4499
Q15365;P57721-2;P57721-3;P57721-5;P57721-4;P57721	Q15365	Poly(rC)-binding protein 1	PCBP1	-	-	-	YES	-0.29353	0.372111	27.685	27.1971	27.4463	27.9864	27.824	27.3986
Q15366-6;Q15366-3;Q15366;Q15366-2;Q15366-7;Q15366-8;Q15366-4;Q15366-5	Q15366-6;Q15366-3;Q15366;Q15366-2;Q15366-7;Q15366-8;Q15366-4;Q15366-5	Poly(rC)-binding protein 2	PCBP2	-	-	-	YES	-0.0582	0.887359	25.6968	24.2874	25.4651	25.7506	25.2104	24.6629
Q15369;Q15369-2	Q15369;Q15369-2	Transcription elongation factor B polypeptide 1	TCEB1	-	-	-	-	0.268643	0.550841	25.1765	24.8144	25.6931	25.0084	24.8811	24.9886
Q15370;Q15370-2	Q15370;Q15370-2	Transcription elongation factor B polypeptide 2	TCEB2	-	-	-	-	0.832803	0.10609	25.8027	26.8326	26.0603	26.076	25.6274	24.4937
Q15393;Q15393-3;Q15393-2	Q15393	Splicing factor 3B subunit 3	SF3B3	-	-	-	-	-0.648757	0.182436	27.8072	25.6399	27.2027	27.8611	27.7154	27.0194
Q15424-2;Q15424;Q15424-4;Q15424-3	Q15424-2;Q15424;Q15424-4;Q15424-3	Scaffold attachment factor B1	SAFB	-	-	-	-	-0.547013	0.3877	25.2038	25.8424	24.6874	25.9087	25.726	25.7401
Q15459-2;Q15459	Q15459-2;Q15459	Splicing factor 3A subunit 1	SF3A1	-	-	-	-	0.818293	0.170743	24.6955	25.8694	24.7893	23.9307	24.1999	24.7687
Q15582	Q15582	Transforming growth factor-beta-induced protein ig-h3	TGFBI	YES	Core matrisome	ECM Glycoproteins	YES	1.8719	0.00120113	30.2063	28.9741	30.2075	28.1455	27.9218	27.7049
Q15637-4;Q15637-6;Q15637-7;Q15637-3;Q15637-2;Q15637;Q15637-5	Q15637-4;Q15637-6;Q15637-7;Q15637-3;Q15637-2;Q15637;Q15637-5	Splicing factor 1	SF1	-	-	-	-	-0.64553	0.186683	25.3977	23.6772	24.7184	25.8425	25.2288	24.6587
Q15691	Q15691	Microtubule-associated protein RP/EB family member 1	MAPRE1	-	-	-	-	0.20317	0.572941	27.5672	28.2174	27.35	27.7482	27.8999	26.877
Q15904	Q15904	V-type proton ATPase subunit S1	ATP6AP1	-	-	-	YES	-0.17045	0.738136	27.6244	26.2606	28.1504	27.2471	27.6526	27.6471
Q16531;Q16531-2	Q16531	DNA damage-binding protein 1	DDB1	-	-	-	YES	-0.274253	0.542081	28.506	26.7243	28.5323	28.5408	28.3712	27.6733
Q16543	Q16543	Hsp90 co-chaperone Cdc37;Hsp90 co-chaperone Cdc37, N-terminally processed	CDC37	-	-	-	YES	-0.339213	0.217568	28.0908	28.5441	28.1036	28.7878	28.4816	28.4868
Q16555-2;Q16555;Q14195;Q14194;Q14195-2;Q14194-2	Q16555-2;Q16555	Dihydropyrimidinase-related protein 2	DPYSL2	-	-	-	YES	-0.0430967	0.862321	27.8535	28.3942	28.1114	28.257	27.9494	28.282
Q16576;Q16576-2	Q16576;Q16576-2	Histone-binding protein RBBP7	RBBP7	-	-	-	-	-0.0440133	0.83593	27.8989	27.9098	28.1304	28.0696	27.8675	28.134
Q16643;Q16643-3;Q16643-2	Q16643;Q16643-3;Q16643-2	Drebrin	DBN1	-	-	-	-	-1.67259	0.00114744	25.3894	26.4846	25.3898	27.1985	27.5236	27.5595
Q16658	Q16658	Fascin	FSCN1	-	-	-	YES	-1.81799	0.0022078	25.6065	23.471	25.8625	26.3902	26.9786	27.0252
Q16777;Q6FI13	Q16777;Q6FI13	Histone H2A type 2-C;Histone H2A type 2-A	HIST2H2AC;HIST2H2AA3	-	-	-	-	0.328097	0.544188	28.06	27.7121	28.1042	27.7639	27.5131	27.615
Q16881-5;Q16881-2;Q16881-4;Q16881-3;Q16881-6;Q16881;Q16881-7	Q16881-5;Q16881-2;Q16881-4;Q16881-3;Q16881-6;Q16881;Q16881-7	Thioredoxin reductase 1, cytoplasmic	TXNRD1	-	-	-	YES	-0.51308	0.0527952	28.4379	27.8517	28.5334	28.9324	28.828	28.6019
Q32MZ4-3;Q32MZ4-2;Q32MZ4;Q32MZ4-4	Q32MZ4-3;Q32MZ4-2;Q32MZ4;Q32MZ4-4	Leucine-rich repeat flightless-interacting protein 1	LRRFIP1	-	-	-	-	0.0240633	0.952297	25.3422	26.4972	26.067	25.703	25.9185	26.2127
Q6EMK4	Q6EMK4	Vasorin	VASN	-	-	-	YES	1.98139	0.00313013	26.4492	27.8243	26.3515	24.8628	24.8802	24.9379
Q7KZF4	Q7KZF4	Staphylococcal nuclease domain-containing protein 1	SND1	-	-	-	YES	0.159823	0.522535	28.0638	28.3944	27.9077	28.1277	27.9443	27.8145
Q7Z6Z7-2;Q7Z6Z7-3;Q7Z6Z7	Q7Z6Z7-2;Q7Z6Z7-3;Q7Z6Z7	E3 ubiquitin-protein ligase HUWE1	HUWE1	-	-	-	YES	0.0905967	0.887476	25.5841	26.1284	25.9396	25.9689	25.8881	25.5234
Q86SF2	Q86SF2	N-acetylgalactosaminyltransferase 7	GALNT7	-	-	-	YES	0.871177	0.190526	26.1335	26.8381	25.2622	26.347	23.6206	25.6527
Q86U42-2;Q86U42;Q92843-2	Q86U42-2;Q86U42;Q92843-2	Polyadenylate-binding protein 2	PABPN1	-	-	-	-	0.842793	0.0609335	24.5619	25.7148	24.9217	23.8075	24.4768	24.3857
Q86VP6-2;Q86VP6;Q86VP6-3	Q86VP6-2;Q86VP6	Cullin-associated NEDD8-dissociated protein 1	CAND1	-	-	-	YES	0.0857067	0.769613	26.9706	26.7127	26.9969	27.078	26.7468	26.5983
Q86X29-6;Q86X29-5;Q86X29-4;Q86X29;Q86X29-3;Q86X29-2	Q86X29-6;Q86X29-5;Q86X29-4;Q86X29;Q86X29-3;Q86X29-2	Lipolysis-stimulated lipoprotein receptor	LSR	-	-	-	YES	-0.0763867	0.788055	26.338	25.5208	26.4349	26.0848	26.1664	26.2716
Q8NBJ4-2;Q8NBJ4	Q8NBJ4-2;Q8NBJ4	Golgi membrane protein 1	GOLM1	-	-	-	-	0.45006	0.235841	28.5716	28.1159	28.8085	28.0491	28.2239	27.8728
Q8NBJ7;Q8NBJ7-2;Q8NBJ7-5;Q8NBJ7-3;Q8NBJ7-4	Q8NBJ7;Q8NBJ7-2;Q8NBJ7-5;Q8NBJ7-3	Sulfatase-modifying factor 2	SUMF2	-	-	-	-	0.160833	0.784977	26.6373	24.2313	26.7148	25.4065	25.5953	26.099
Q8NBS9;Q8NBS9-2	Q8NBS9;Q8NBS9-2	Thioredoxin domain-containing protein 5	TXNDC5	-	-	-	YES	-0.0290767	0.892821	29.077	28.9266	29.2814	29.2376	28.9833	29.1513
Q8NC51-3;Q8NC51;Q8NC51-4;Q8NC51-2	Q8NC51-3;Q8NC51;Q8NC51-4;Q8NC51-2	Plasminogen activator inhibitor 1 RNA-binding protein	SERBP1	-	-	-	YES	-0.257817	0.474653	26.6422	26.3647	26.3578	26.1283	26.6928	27.3171
Q8WUM4;Q8WUM4-2;Q8WUM4-3	Q8WUM4;Q8WUM4-2	Programmed cell death 6-interacting protein	PDCD6IP	-	-	-	YES	-0.0240167	0.937622	26.3507	26.7872	25.8021	26.436	26.6618	25.9141
Q8WVQ1-3;Q8WVQ1;Q8WVQ1-2	Q8WVQ1-3;Q8WVQ1	Soluble calcium-activated nucleotidase 1	CANT1	-	-	-	YES	-0.52416	0.0356433	26.7111	26.3843	26.5396	27.233	26.991	26.9835
Q8WX77	Q8WX77	Insulin-like growth factor-binding protein-like 1	IGFBPL1	YES	Core matrisome	ECM Glycoproteins	-	-1.53672	0.00107456	26.9566	27.5198	26.7261	29.1758	28.546	28.0908
Q8WXF1;Q8WXF1-2	Q8WXF1;Q8WXF1-2	Paraspeckle component 1	PSPC1	-	-	-	-	-0.79507	0.147248	25.1285	24.2134	26.259	26.0965	26.4111	25.4785
Q8WXX5	Q8WXX5	DnaJ homolog subfamily C member 9	DNAJC9	-	-	-	-	-0.44469	0.0983058	25.7921	25.6482	25.5866	26.1901	26.1054	26.0654
Q8WZA9	Q8WZA9	Immunity-related GTPase family Q protein	IRGQ	-	-	-	-	-0.402747	0.299708	26.7252	26.667	27.0254	26.7739	27.673	27.1788
Q92520	Q92520	Protein FAM3C	FAM3C	-	-	-	YES	0.30438	0.335727	27.6117	27.9118	27.3047	27.7108	27.4708	26.7335
Q92598-2;Q92598-3;Q92598;Q92598-4	Q92598-2;Q92598-3;Q92598;Q92598-4	Heat shock protein 105 kDa	HSPH1	-	-	-	YES	-0.06448	0.767717	27.641	27.7323	28.0301	28.0438	27.6921	27.8609
Q92626;Q92626-2	Q92626	Peroxidasin homolog	PXDN	YES	Core matrisome	ECM Glycoproteins	YES	-1.42034	0.0690558	28.5991	29.1952	27.5266	30.1487	30.3023	29.1311
Q92688-2;Q92688	Q92688-2;Q92688	Acidic leucine-rich nuclear phosphoprotein 32 family member B	ANP32B	-	-	-	YES	-0.0545633	0.947594	25.6978	26.8972	25.2941	27.3605	26.8057	23.8865
Q92692-2;Q92692	Q92692-2;Q92692	Nectin-2	PVRL2	-	-	-	-	-0.517293	0.189892	26.4827	26.8845	26.397	27.4444	27.2251	26.6466
Q92734-2;Q92734;Q92734-4;Q92734-3	Q92734-2;Q92734;Q92734-4;Q92734-3	Protein TFG	TFG	-	-	-	-	-0.0612667	0.896921	26.3268	25.443	26.0078	26.689	25.9403	25.3321
Q92769-3;Q92769;Q13547;O15379;O15379-2	Q92769-3;Q92769;Q13547	Histone deacetylase 2;Histone deacetylase 1	HDAC2;HDAC1	-	-	-	-	0.55605	0.280993	25.3333	25.5151	25.0318	23.6327	25.0706	25.5088
Q92820	Q92820	Gamma-glutamyl hydrolase	GGH	-	-	-	YES	-0.996067	0.00114151	29.6995	29.4684	29.5803	30.9915	30.4807	30.2643
Q92841-1;Q92841-3;Q92841-2;Q92841;O15523-2;O15523	Q92841-1;Q92841-3;Q92841-2;Q92841	Probable ATP-dependent RNA helicase DDX17	DDX17	-	-	-	-	0.380893	0.217518	25.4741	25.1707	25.2932	25.1141	25.0219	24.6594
Q92859-3;Q92859-2;Q92859-4;Q92859	Q92859-3;Q92859-2;Q92859-4;Q92859	Neogenin	NEO1	-	-	-	-	-1.77273	0.000307134	24.869	23.47	24.3578	25.9964	25.6584	26.3601
Q92896;Q92896-3;Q92896-2	Q92896;Q92896-3;Q92896-2	Golgi apparatus protein 1	GLG1	-	-	-	YES	-0.03132	0.928554	27.7083	27.2404	26.4923	27.426	27.2753	26.8336
Q92900-2;Q92900	Q92900-2;Q92900	Regulator of nonsense transcripts 1	UPF1	-	-	-	-	-0.252203	0.575388	23.7888	23.4931	23.3395	23.7185	23.7154	23.944
Q92945	Q92945	Far upstream element-binding protein 2	KHSRP	-	-	-	-	-0.14077	0.5936	27.3304	27.9316	27.2059	27.7106	27.8303	27.3493
Q96AE4;Q96AE4-2;Q96I24-2	Q96AE4;Q96AE4-2	Far upstream element-binding protein 1	FUBP1	-	-	-	-	0.302727	0.515166	26.9431	27.4972	26.3668	26.5239	27.0267	26.3483
Q96C19;Q9BUP0-2;Q9BUP0	Q96C19	EF-hand domain-containing protein D2	EFHD2	-	-	-	-	0.439113	0.487338	23.8009	26.5585	26.3654	25.3039	24.9618	25.1418
Q96C90;P53671-3	Q96C90	Protein phosphatase 1 regulatory subunit 14B	PPP1R14B	-	-	-	-	0.564443	0.396482	26.9512	27.6169	26.9333	26.4138	26.5828	26.8115
Q96CT7	Q96CT7	Coiled-coil domain-containing protein 124	CCDC124	-	-	-	-	-0.59469	0.0655122	25.6827	25.9223	25.6306	26.227	26.5024	26.2904
Q96D15	Q96D15	Reticulocalbin-3	RCN3	-	-	-	-	-0.0563633	0.83786	24.9153	25.0661	24.9452	24.9224	24.6342	25.5391
Q96FW1;Q96FW1-2	Q96FW1;Q96FW1-2	Ubiquitin thioesterase OTUB1	OTUB1	-	-	-	YES	-0.315597	0.210902	27.5921	26.6442	27.4904	27.5943	27.3789	27.7002
Q96G03;Q96G03-2	Q96G03	Phosphoglucomutase-2	PGM2	-	-	-	YES	0.337073	0.25283	28.1397	28.019	28.2015	27.8551	28.1023	27.3915
Q96KP4;Q96KP4-2	Q96KP4;Q96KP4-2	Cytosolic non-specific dipeptidase	CNDP2	-	-	-	YES	0.235587	0.321093	27.7497	28.4069	27.8631	27.7611	27.7652	27.7866
Q96RS6;Q96RS6-2;Q96RS6-3	Q96RS6;Q96RS6-2;Q96RS6-3	NudC domain-containing protein 1	NUDCD1	-	-	-	-	-0.550473	0.369377	26.9636	26.2089	27.0072	27.5565	27.2076	27.067
Q96TA1-2;Q96TA1	Q96TA1-2;Q96TA1	Niban-like protein 1	FAM129B	-	-	-	YES	1.10586	0.026371	27.1157	25.1053	26.2652	25.5649	24.9801	24.6236
Q99426-2;Q99426	Q99426-2;Q99426	Tubulin-folding cofactor B	TBCB	-	-	-	-	0.277157	0.531772	26.057	26.5968	26.4178	25.3137	25.9869	26.9394
Q99436;Q99436-2	Q99436	Proteasome subunit beta type-7	PSMB7	-	-	-	-	0.31717	0.263975	28.1134	27.9507	28.0061	27.8837	27.6651	27.5699
Q99471;Q99471-2;Q99471-3	Q99471;Q99471-2;Q99471-3	Prefoldin subunit 5	PFDN5	-	-	-	-	0.21485	0.714422	26.0323	26.2054	26.1448	26.2632	25.8858	25.589
Q99497	Q99497	Protein deglycase DJ-1	PARK7	-	-	-	YES	0.16327	0.558889	27.9708	28.6717	28.1258	28.0138	27.9938	28.2709
Q99584	Q99584	Protein S100-A13	S100A13	YES	Matrisome-associated	Secreted Factors	-	0.77431	0.126221	26.117	26.9166	26.1662	24.9734	25.686	26.2176
Q99613;Q99613-2;B5ME19	Q99613;Q99613-2;B5ME19	Eukaryotic translation initiation factor 3 subunit C;Eukaryotic translation initiation factor 3 subunit C-like protein	EIF3C;EIF3CL	-	-	-	-	-0.424513	0.249571	27.029	26.4756	27.5059	27.1753	27.635	27.4737
Q99715-4;Q99715;Q99715-2	Q99715-4;Q99715	Collagen alpha-1(XII) chain	COL12A1	YES	Core matrisome	Collagens	YES	-1.16355	0.0258814	29.9542	29.8393	28.5604	30.8024	30.9551	30.0872
Q99729-3;Q99729-2;Q99729-4;Q99729	Q99729-3;Q99729-2;Q99729-4;Q99729	Heterogeneous nuclear ribonucleoprotein A/B	HNRNPAB	-	-	-	-	-1.01507	0.00337456	27.0327	26.8813	27.2862	28.3233	27.8577	28.0644
Q99733;Q99733-2	Q99733;Q99733-2	Nucleosome assembly protein 1-like 4	NAP1L4	-	-	-	-	-1.09623	0.133525	27.087	24.4196	27.0321	27.4121	27.2657	27.1496
Q99829	Q99829	Copine-1	CPNE1	-	-	-	YES	0.98893	0.00764901	27.1036	26.7577	26.7944	26.1522	25.9418	25.595
Q99832-3;Q99832;Q99832-4;Q99832-2	Q99832-3;Q99832;Q99832-4;Q99832-2	T-complex protein 1 subunit eta	CCT7	-	-	-	YES	0.05831	0.865723	27.1469	26.6773	26.9536	26.8374	26.793	26.9725
Q99873-3;Q99873-2;Q99873-4;Q99873;Q9NR22-2;Q9NR22	Q99873-3;Q99873-2;Q99873-4;Q99873	Protein arginine N-methyltransferase 1	PRMT1	-	-	-	-	-0.234743	0.52404	27.7649	26.8922	27.5297	27.9413	27.6072	27.3424
Q9BQT9;Q9BQT9-2	Q9BQT9;Q9BQT9-2	Calsyntenin-3	CLSTN3	-	-	-	-	0.474147	0.0852731	26.2962	26.5577	26.0738	25.8978	25.8344	25.7731
Q9BR76;A9Z1Z3-3;A9Z1Z3	Q9BR76	Coronin-1B	CORO1B	-	-	-	YES	0.43406	0.0904179	27.4007	27.1548	27.6738	27.0017	26.8601	27.0654
Q9BRK5;Q9BRK5-6;Q9BRK5-2;Q9BRK5-4;Q9BRK5-3;Q9BRK5-5	Q9BRK5;Q9BRK5-6;Q9BRK5-2	45 kDa calcium-binding protein	SDF4	-	-	-	YES	0.12361	0.65072	28.1507	28.7838	28.6619	28.1269	28.2664	28.8322
Q9BS26	Q9BS26	Endoplasmic reticulum resident protein 44	ERP44	-	-	-	YES	0.481467	0.424789	25.7065	28.0141	26.7025	26.7305	26.4901	25.7582
Q9BT78;Q9BT78-2	Q9BT78;Q9BT78-2	COP9 signalosome complex subunit 4	COPS4	-	-	-	-	-0.771787	0.131539	25.5465	23.6899	25.8574	25.6685	25.7586	25.9821
Q9BV57;Q9BV57-2	Q9BV57;Q9BV57-2	1,2-dihydroxy-3-keto-5-methylthiopentene dioxygenase	ADI1	-	-	-	-	-0.626123	0.100959	25.1702	23.579	25.1222	25.4426	25.0781	25.229
Q9BVG4	Q9BVG4	Protein PBDC1	PBDC1	-	-	-	-	-0.190963	0.74037	27.3839	27.8383	27.6506	27.9985	27.6909	27.7564
Q9BWD1;Q9BWD1-2	Q9BWD1;Q9BWD1-2	Acetyl-CoA acetyltransferase, cytosolic	ACAT2	-	-	-	YES	-0.0929167	0.786442	26.0404	26.3417	25.5407	26.3186	26.1146	25.7683
Q9GZL7	Q9GZL7	Ribosome biogenesis protein WDR12	WDR12	-	-	-	-	0.575853	0.273609	24.7727	25.3789	24.8791	23.2595	25.0861	24.9576
Q9H0D6-2;Q9H0D6	Q9H0D6-2;Q9H0D6	5-3 exoribonuclease 2	XRN2	-	-	-	-	-0.476497	0.425181	25.2372	24.2302	24.5371	25.1348	25.3051	24.9942
Q9H0U4;P62820;P62820-3;P62820-2;Q92928;Q92930;P61006-2;P61006	Q9H0U4;P62820	Ras-related protein Rab-1B;Ras-related protein Rab-1A	RAB1B;RAB1A	-	-	-	-	0.5199	0.027708	26.5451	26.167	26.0582	25.8446	25.8304	25.5355
Q9HAV7	Q9HAV7	GrpE protein homolog 1, mitochondrial	GRPEL1	-	-	-	-	1.42035	0.0236349	25.6476	27.7751	25.7258	24.83	25.453	24.6043
Q9HB07	Q9HB07	UPF0160 protein MYG1, mitochondrial	C12orf10	-	-	-	-	-0.594353	0.251519	25.2697	24.6731	24.9171	25.8559	25.4293	25.3577
Q9HC38-2;Q9HC38;Q9HC38-3	Q9HC38-2;Q9HC38;Q9HC38-3	Glyoxalase domain-containing protein 4	GLOD4	-	-	-	YES	-0.17847	0.60697	25.4063	26.0311	25.6577	25.8225	26.0333	25.7747
Q9HD42	Q9HD42	Charged multivesicular body protein 1a	CHMP1A	-	-	-	YES	0.227807	0.642924	23.7846	24.3248	24.6511	23.9551	24.1022	24.0197
Q9NPH3-3;Q9NPH3-2;Q9NPH3;Q9NPH3-5	Q9NPH3-3;Q9NPH3-2;Q9NPH3;Q9NPH3-5	Interleukin-1 receptor accessory protein	IL1RAP	-	-	-	-	-0.08764	0.815274	25.0711	23.727	25.2463	24.6343	24.5854	25.0876
Q9NPR2-2;Q9NPR2	Q9NPR2-2;Q9NPR2	Semaphorin-4B	SEMA4B	YES	Matrisome-associated	ECM-affiliated Proteins	-	1.34227	0.00043352	25.987	25.3746	25.938	23.7293	24.7402	24.8033
Q9NQG5	Q9NQG5	Regulation of nuclear pre-mRNA domain-containing protein 1B	RPRD1B	-	-	-	-	0.346817	0.297071	25.3537	25.6601	24.6597	25.0983	24.9958	24.539
Q9NRX4-2;Q9NRX4	Q9NRX4-2;Q9NRX4	14 kDa phosphohistidine phosphatase	PHPT1	-	-	-	YES	0.728417	0.181043	26.396	26.8631	26.1083	25.6981	26.1604	25.3238
Q9NUQ9;Q9NUQ9-2;Q9H0Q0	Q9NUQ9;Q9NUQ9-2	Protein FAM49B	FAM49B	-	-	-	YES	-0.327443	0.455734	25.7665	25.3149	25.6721	26.2872	25.9473	25.5014
Q9NVA2;Q9NVA2-2;Q14141-2;Q14141-4;Q14141;Q14141-3;Q9P0V9-3;Q9P0V9;Q9P0V9-2	Q9NVA2;Q9NVA2-2	Septin-11	SEPT11	-	-	-	-	-0.209173	0.555322	28.1541	27.1201	28.321	28.2215	27.8504	28.1507
Q9NX46	Q9NX46	Poly(ADP-ribose) glycohydrolase ARH3	ADPRHL2	-	-	-	-	-0.59113	0.0947929	25.3748	25.4979	25.6563	25.9271	26.1031	26.2722
Q9NY33;Q9NY33-4;Q9NY33-2	Q9NY33;Q9NY33-4	Dipeptidyl peptidase 3	DPP3	-	-	-	YES	0.868243	0.000963488	27.8726	28.1644	28.2338	27.3339	27.2033	27.1288
Q9NZL9;Q9NZL9-3;Q9NZL9-4;Q9NZL9-2;Q9NZL9-5	Q9NZL9;Q9NZL9-3;Q9NZL9-4;Q9NZL9-2	Methionine adenosyltransferase 2 subunit beta	MAT2B	-	-	-	YES	-0.299573	0.280518	26.3846	27.389	26.6044	27.1757	27.095	27.006
Q9NZT1	Q9NZT1	Calmodulin-like protein 5	CALML5	-	-	-	-	-0.359823	0.636048	26.3391	28.0406	28.4787	26.5593	29.0258	28.3529
Q9NZZ3;Q9NZZ3-2	Q9NZZ3;Q9NZZ3-2	Charged multivesicular body protein 5	CHMP5	-	-	-	YES	-0.141153	0.526572	25.7675	25.4411	25.7873	25.9418	25.835	25.6426
Q9P2E9-3;Q9P2E9-2;Q9P2E9;Q8N4C6-6;Q8N4C6-11;Q8N4C6-4;Q8N4C6-9;Q8N4C6-2;Q8N4C6;Q8N4C6-5;Q8N4C6-10;Q8N4C6-7	Q9P2E9-3;Q9P2E9-2;Q9P2E9	Ribosome-binding protein 1	RRBP1	-	-	-	-	0.149463	0.766088	25.7749	25.7896	25.7145	25.4745	25.8327	25.5234
Q9UBS4	Q9UBS4	DnaJ homolog subfamily B member 11	DNAJB11	-	-	-	-	-0.897317	0.0577627	25.0139	24.2042	24.9506	26.0995	25.2591	25.502
Q9UBT2;Q9UBT2-2	Q9UBT2;Q9UBT2-2	SUMO-activating enzyme subunit 2	UBA2	-	-	-	-	0.0566333	0.890641	26.2544	24.3706	25.2988	25.73	25.2561	24.7678
Q9UHD8-7;Q9UHD8-2;Q9UHD8-5;Q9UHD8;Q9UHD8-3;Q9UHD8-4;Q9UHD8-9;Q9UHD8-8	Q9UHD8-7;Q9UHD8-2;Q9UHD8-5;Q9UHD8;Q9UHD8-3;Q9UHD8-4;Q9UHD8-9;Q9UHD8-8	Septin-9	SEPT9	-	-	-	-	0.452113	0.377637	25.3778	24.8135	24.9868	24.675	24.8976	24.2492
Q9UHV9	Q9UHV9	Prefoldin subunit 2	PFDN2	-	-	-	-	0.133357	0.843816	26.6955	27.5644	27.1669	27.2806	26.956	26.7902
Q9UJU6;Q9UJU6-5	Q9UJU6;Q9UJU6-5	Drebrin-like protein	DBNL	-	-	-	YES	0.345497	0.214415	26.6895	26.235	26.72	26.1476	26.3572	26.1033
Q9UK76;Q9UK76-2;Q9UK76-3	Q9UK76;Q9UK76-2	Hematological and neurological expressed 1 protein;Hematological and neurological expressed 1 protein, N-terminally processed	HN1	-	-	-	-	0.59505	0.281998	26.5553	25.5757	26.7657	25.4603	25.3354	26.3158
Q9UKK9	Q9UKK9	ADP-sugar pyrophosphatase	NUDT5	-	-	-	YES	-0.106917	0.680957	26.841	27.7945	27.105	27.457	27.2349	27.3693
Q9UKY7-2;Q9UKY7;Q9UKY7-3	Q9UKY7-2;Q9UKY7	Protein CDV3 homolog	CDV3	-	-	-	-	-0.258907	0.660944	24.7682	24.1319	26.0703	25.4282	24.9104	25.4086
Q9UL46	Q9UL46	Proteasome activator complex subunit 2	PSME2	-	-	-	YES	0.0914167	0.91638	28.6548	27.4502	28.7671	28.4258	28.2726	27.8994
Q9ULV4;Q9ULV4-2;Q9ULV4-3;Q6QEF8-4;Q6QEF8-3;Q6QEF8-2;Q6QEF8-5;Q6QEF8	Q9ULV4;Q9ULV4-2;Q9ULV4-3	Coronin-1C	CORO1C	-	-	-	-	-0.51684	0.118191	28.2388	29.0696	27.5782	28.8544	28.9033	28.6794
Q9UMS4	Q9UMS4	Pre-mRNA-processing factor 19	PRPF19	-	-	-	-	-0.138573	0.730261	26.1187	25.883	26.0746	26.6655	25.8809	25.9458
Q9UNF0-2;Q9UNF0	Q9UNF0-2;Q9UNF0	Protein kinase C and casein kinase substrate in neurons protein 2	PACSIN2	-	-	-	YES	-0.21936	0.526216	24.8328	24.4286	24.5258	24.8324	24.7261	24.8866
Q9UNH7;Q9UNH7-2	Q9UNH7;Q9UNH7-2	Sorting nexin-6;Sorting nexin-6, N-terminally processed	SNX6	-	-	-	-	-0.178917	0.609842	24.276	23.1745	23.8347	23.9514	24.0863	23.7843
Q9UNM6;Q9UNM6-2	Q9UNM6;Q9UNM6-2	26S proteasome non-ATPase regulatory subunit 13	PSMD13	-	-	-	-	-0.245163	0.683184	26.5391	26.0803	26.3846	26.8823	26.4518	26.4054
Q9UNS2;Q9UNS2-2	Q9UNS2;Q9UNS2-2	COP9 signalosome complex subunit 3	COPS3	-	-	-	-	-0.217247	0.620716	24.9398	24.7008	24.1045	24.821	25.2396	24.3363
Q9UNZ2;Q9UNZ2-5;Q9UNZ2-4;Q9UNZ2-6	Q9UNZ2;Q9UNZ2-5;Q9UNZ2-4;Q9UNZ2-6	NSFL1 cofactor p47	NSFL1C	-	-	-	-	0.0764767	0.859926	26.3061	26.0752	26.9347	26.1291	26.3868	26.5708
Q9UQ80;Q9UQ80-2	Q9UQ80;Q9UQ80-2	Proliferation-associated protein 2G4	PA2G4	-	-	-	YES	-0.419487	0.184554	28.774	28.758	28.812	29.1886	29.3703	29.0436
Q9Y224	Q9Y224	UPF0568 protein C14orf166	C14orf166	-	-	-	-	0.431103	0.223977	24.6249	24.8046	25.3611	24.8361	24.487	24.1743
Q9Y230;Q9Y230-2	Q9Y230;Q9Y230-2	RuvB-like 2	RUVBL2	-	-	-	YES	0.06699	0.79629	27.8597	27.403	27.9042	27.6087	27.7263	27.6309
Q9Y262-2;Q9Y262	Q9Y262-2;Q9Y262	Eukaryotic translation initiation factor 3 subunit L	EIF3L	-	-	-	-	-0.741983	0.0461569	26.6033	25.9137	26.2714	27.3314	27.2968	26.386
Q9Y265;Q9Y265-2	Q9Y265;Q9Y265-2	RuvB-like 1	RUVBL1	-	-	-	YES	0.144837	0.644887	26.6468	26.3854	26.2862	26.4924	26.231	26.1605
Q9Y266	Q9Y266	Nuclear migration protein nudC	NUDC	-	-	-	-	-0.599293	0.0636121	26.2946	26.3162	26.7966	27.0529	27.0822	27.0702
Q9Y2B0;Q9Y2B0-2	Q9Y2B0	Protein canopy homolog 2	CNPY2	-	-	-	-	0.192057	0.605565	26.0982	26.0713	26.2503	26.0455	25.5962	26.2019
Q9Y383;Q96HJ9-2;Q9Y383-3;Q9Y383-2	Q9Y383;Q96HJ9-2;Q9Y383-3;Q9Y383-2	Putative RNA-binding protein Luc7-like 2	LUC7L2	-	-	-	-	0.150753	0.778684	25.1754	25.268	25.8479	25.2029	25.269	25.3671
Q9Y3B8-3;Q9Y3B8-2	Q9Y3B8-3;Q9Y3B8-2	Oligoribonuclease, mitochondrial	REXO2	-	-	-	-	0.490987	0.148488	27.3554	28.2816	27.2268	26.9835	27.5846	26.8227
Q9Y3F4;Q9Y3F4-2	Q9Y3F4;Q9Y3F4-2	Serine-threonine kinase receptor-associated protein	STRAP	-	-	-	-	-0.21894	0.623739	25.8536	26.1737	25.6417	26.3063	26.0075	26.012
Q9Y3I0	Q9Y3I0	tRNA-splicing ligase RtcB homolog	RTCB	-	-	-	-	-0.145447	0.585042	25.0712	25.4377	24.5406	25.2601	25.2067	25.019
Q9Y490;Q9Y4G6	Q9Y490	Talin-1	TLN1	-	-	-	YES	0.303457	0.224922	28.6657	29.2637	28.7858	28.7511	28.6828	28.3709
Q9Y4L1;Q9Y4L1-2	Q9Y4L1;Q9Y4L1-2	Hypoxia up-regulated protein 1	HYOU1	-	-	-	YES	0.47201	0.375386	27.1913	27.8455	26.9952	27.0802	26.736	26.7998
Q9Y4Y9;Q9Y4Y9-2	Q9Y4Y9;Q9Y4Y9-2	U6 snRNA-associated Sm-like protein LSm5	LSM5	-	-	-	-	-0.750797	0.254372	26.303	23.4744	25.9642	25.9353	26.2122	25.8465
Q9Y5B9	Q9Y5B9	FACT complex subunit SPT16	SUPT16H	-	-	-	-	-0.545213	0.0763389	26.6218	26.0306	26.5197	27.1233	26.8986	26.7859
Q9Y5S9;Q9Y5S9-2	Q9Y5S9;Q9Y5S9-2	RNA-binding protein 8A	RBM8A	-	-	-	-	-0.196117	0.497809	26.492	27.2386	26.9157	27.0334	27.1588	27.0425
Q9Y678	Q9Y678	Coatomer subunit gamma-1	COPG1	-	-	-	-	0.224027	0.552836	26.5349	25.8802	26.843	26.4803	26.3312	25.7745
Q9Y696	Q9Y696	Chloride intracellular channel protein 4	CLIC4	-	-	-	YES	-0.17265	0.711822	26.3734	26.9277	26.1012	26.5961	26.7225	26.6017

## Sheet: Supplementary Table 1c
Supplementary Table 1 - Mass spectrometry-based proteomic analysis of breast cancer cell secretomes
MDA-Lung vs MDA-WT
										LFQ intensity
										MDA-Lung			MDA-WT
Protein IDs	Majority protein IDs	Protein names	Gene names	Matrisome	Division	Category	Exosome	log2(MDA-Lung/MDA-WT)	p value (MDA-Lung vs MDA-WT)	R1	R2	R3	R1	R2	R3
Q13765;E9PAV3-2;E9PAV3;Q9BZK3	Q13765;E9PAV3-2;E9PAV3	Nascent polypeptide-associated complex subunit alpha;Nascent polypeptide-associated complex subunit alpha, muscle-specific form	NACA	-	-	-	-	0.06678	0.789533	28.4906	28.1678	28.2456	28.5057	28.0875	28.1104
O00115-2;O00115	O00115-2;O00115	Deoxyribonuclease-2-alpha	DNASE2	-	-	-	YES	-0.0553633	0.855961	28.0346	28.2177	27.8093	28.0832	28.2934	27.8511
O00151	O00151	PDZ and LIM domain protein 1	PDLIM1	-	-	-	-	0.40556	0.427355	26.4849	25.812	25.9933	26.7312	25.9872	24.3551
O00170	O00170	AH receptor-interacting protein	AIP	-	-	-	-	0.44446	0.222681	25.3953	24.4618	25.4125	24.6855	24.5721	24.6786
O00231;O00231-2	O00231;O00231-2	26S proteasome non-ATPase regulatory subunit 11	PSMD11	-	-	-	-	-0.44552	0.127407	26.1471	25.5801	25.8222	26.2897	26.4716	26.1246
O00233;O00233-2;O00233-3	O00233;O00233-2	26S proteasome non-ATPase regulatory subunit 9	PSMD9	-	-	-	-	0.264543	0.501568	25.0612	25.2222	25.2176	25.492	23.8861	25.3292
O00299	O00299	Chloride intracellular channel protein 1	CLIC1	-	-	-	YES	-0.535913	0.057309	29.8414	29.8281	29.2371	30.1976	30.2528	30.0639
O00303	O00303	Eukaryotic translation initiation factor 3 subunit F	EIF3F	-	-	-	-	-0.304017	0.456853	27.2678	26.9687	26.96	27.6613	27.4689	26.9785
O00391;O00391-2;Q8WWX9	O00391;O00391-2	Sulfhydryl oxidase 1	QSOX1	-	-	-	YES	-0.239357	0.272403	33.8417	34.1518	33.8617	34.2502	34.2437	34.0793
O00410;O00410-3;O00410-2;O60518	O00410;O00410-3;O00410-2	Importin-5	IPO5	-	-	-	-	-0.169317	0.721526	29.1106	29.0517	28.7262	29.9258	29.0428	28.4278
O00468-6;O00468-3;O00468-7;O00468-5;O00468-4;O00468;O00468-2	O00468-6;O00468-3;O00468-7;O00468-5;O00468-4;O00468;O00468-2	Agrin;Agrin N-terminal 110 kDa subunit;Agrin C-terminal 110 kDa subunit;Agrin C-terminal 90 kDa fragment;Agrin C-terminal 22 kDa fragment	AGRN	YES	Core matrisome	ECM Glycoproteins	YES	0.779337	0.00833204	30.4076	30.8774	30.6046	29.983	29.8852	29.6833
O00487	O00487	26S proteasome non-ATPase regulatory subunit 14	PSMD14	-	-	-	-	0.15241	0.770333	25.6402	25.2022	25.0377	26.0765	25.416	23.9304
O00560;O00560-3;O00560-2	O00560;O00560-3;O00560-2	Syntenin-1	SDCBP	-	-	-	YES	0.559697	0.0899837	27.3841	27.585	26.6902	26.7748	26.9221	26.2833
O00584;O00584-2;Q07343-4;Q07343-2;Q07343-3;Q07343	O00584	Ribonuclease T2	RNASET2	-	-	-	YES	-0.445007	0.135678	26.8497	27.3953	26.9604	27.5635	27.4949	27.482
O00764;O00764-3;O00764-2	O00764;O00764-3;O00764-2	Pyridoxal kinase	PDXK	-	-	-	YES	0.616537	0.170434	25.2516	24.915	25.0609	24.0539	24.9256	24.3983
O14579;O14579-2;O14579-3	O14579;O14579-2;O14579-3	Coatomer subunit epsilon	COPE	-	-	-	-	0.08273	0.815813	27.1869	26.2137	26.7415	26.9493	26.6165	26.3281
O14737;O14737-2	O14737;O14737-2	Programmed cell death protein 5	PDCD5	-	-	-	YES	0.410887	0.139771	27.5697	27.4522	27.0783	27.003	27.1441	26.7204
O14744-5;O14744;O14744-3;O14744-2;O14744-4	O14744-5;O14744;O14744-3;O14744-2;O14744-4	Protein arginine N-methyltransferase 5;Protein arginine N-methyltransferase 5, N-terminally processed	PRMT5	-	-	-	-	-0.0198	0.969792	25.615	25.7927	25.437	25.8213	25.9104	25.1725
O14745;O14745-2	O14745;O14745-2	Na(+)/H(+) exchange regulatory cofactor NHE-RF1	SLC9A3R1	-	-	-	YES	0.52189	0.16768	27.1777	26.9361	26.9692	26.2641	26.5373	26.7159
O14786-3;O14786-2;O14786	O14786-3;O14786-2;O14786	Neuropilin-1	NRP1	-	-	-	-	-0.176417	0.420225	28.4013	28.576	28.6712	28.8249	28.6197	28.7331
O14818;O14818-2;O14818-4;Q8TAA3-2;Q8TAA3-5;Q8TAA3	O14818;O14818-2	Proteasome subunit alpha type-7	PSMA7	-	-	-	YES	-0.438907	0.10148	27.6601	27.5695	27.4608	28.3628	27.9191	27.7252
O14974-5;O14974-4;O14974-3;O14974;O14974-2	O14974-5;O14974-4;O14974-3;O14974;O14974-2	Protein phosphatase 1 regulatory subunit 12A	PPP1R12A	-	-	-	-	-0.49655	0.100724	25.5422	25.4995	25.4516	25.9585	26.1308	25.8936
O14979-3;O14979-2;O14979	O14979-3;O14979-2;O14979	Heterogeneous nuclear ribonucleoprotein D-like	HNRNPDL	-	-	-	-	0.15135	0.811165	26.5987	26.8243	26.3873	26.7056	26.4201	26.2307
O15067	O15067	Phosphoribosylformylglycinamidine synthase	PFAS	-	-	-	YES	0.154473	0.844675	26.8116	26.9357	27.1359	26.8499	26.8902	26.6798
O15160-2;O15160	O15160-2;O15160	DNA-directed RNA polymerases I and III subunit RPAC1	POLR1C	-	-	-	-	0.0602867	0.876834	25.2292	25.4794	25.1425	25.2391	25.2984	25.1328
O15212	O15212	Prefoldin subunit 6	PFDN6	-	-	-	-	-0.3797	0.276203	25.9889	26.0526	25.5785	26.3911	26.257	26.1109
O15230;O15230-2;Q16787-3;Q16787	O15230	Laminin subunit alpha-5	LAMA5	YES	Core matrisome	ECM Glycoproteins	YES	2.34932	2.10137e-06	30.8957	31.3446	31.0086	28.9116	28.9611	28.3283
O15231;O15231-3;O15231-6;O15231-5;O15231-4;O15231-7;O15231-8;O15231-2;O15231-9	O15231;O15231-3;O15231-6;O15231-5;O15231-4;O15231-7;O15231-8;O15231-2	Zinc finger protein 185	ZNF185	-	-	-	-	0.17991	0.542941	26.5475	26.3967	26.5684	26.038	26.3609	26.574
O15355	O15355	Protein phosphatase 1G	PPM1G	-	-	-	-	-0.621787	0.00936249	27.566	27.2598	27.3873	28.1132	27.9586	28.0066
O43390-4;O43390;O43390-2;O43390-3	O43390-4;O43390;O43390-2;O43390-3	Heterogeneous nuclear ribonucleoprotein R	HNRNPR	-	-	-	-	-0.01029	0.961361	25.4292	25.5806	25.0575	25.2405	25.4992	25.3584
O43396	O43396	Thioredoxin-like protein 1	TXNL1	-	-	-	-	-1.1882	5.32714e-05	25.1788	25.5985	25.3962	26.6417	26.4333	26.6632
O43399;O43399-5;O43399-7;O43399-2;O43399-4;O43399-3;O43399-6	O43399;O43399-5;O43399-7;O43399-2;O43399-4;O43399-3;O43399-6	Tumor protein D54	TPD52L2	-	-	-	-	-0.285967	0.415961	26.8234	26.4154	25.9247	26.8638	26.8831	26.2744
O43491-4;O43491;O43491-2;O43491-3	O43491-4;O43491;O43491-2;O43491-3	Band 4.1-like protein 2	EPB41L2	-	-	-	YES	-0.62546	0.0598953	24.3535	24.3023	24.1747	24.7109	25.0822	24.9138
O43493-4;O43493-2;O43493-5;O43493-3;O43493;O43493-6	O43493-4;O43493-2;O43493-5;O43493-3;O43493	Trans-Golgi network integral membrane protein 2	TGOLN2	-	-	-	-	-0.601587	0.211397	25.1052	25.1046	26.3021	25.3658	26.7179	26.2329
O43681	O43681	ATPase ASNA1	ASNA1	-	-	-	YES	-0.713793	0.126472	25.4821	25.321	24.7835	26.2628	25.9552	25.5101
O43684-2;O43684	O43684-2;O43684	Mitotic checkpoint protein BUB3	BUB3	-	-	-	-	-0.13888	0.827884	25.2991	25.3242	25.2807	25.3882	25.6394	25.2931
O43707;O43707-2;O43707-3;Q9H254-2;Q9H254-4;Q9H254	O43707;O43707-2;O43707-3	Alpha-actinin-4	ACTN4	-	-	-	YES	-0.31524	0.121054	32.1111	32.0403	32.0258	32.4294	32.2924	32.4011
O43852;O43852-3;O43852-6;O43852-2;O43852-4;O43852-5;O43852-15;O43852-10;O43852-9;O43852-13;O43852-14;O43852-11;O43852-8;O43852-12;O43852-7	O43852;O43852-3;O43852-6;O43852-2;O43852-4;O43852-5;O43852-15;O43852-10	Calumenin	CALU	-	-	-	-	0.209537	0.483476	29.5721	29.6325	29.5682	29.3807	29.1337	29.6297
O60506-4;O60506-3;O60506-2;O60506;O60506-5	O60506-4;O60506-3;O60506-2;O60506;O60506-5	Heterogeneous nuclear ribonucleoprotein Q	SYNCRIP	-	-	-	-	-0.5071	0.273429	26.3598	26.7682	26.2808	27.29	27.1826	26.4575
O60568	O60568	Procollagen-lysine,2-oxoglutarate 5-dioxygenase 3	PLOD3	YES	Matrisome-associated	ECM Regulators	YES	1.54352	4.02208e-05	28.534	29.1188	28.3796	27.2276	27.2474	26.9268
Q99879;Q99877;Q93079;Q5QNW6;P62807;P58876;P57053;O60814;Q5QNW6-2;Q99880;Q16778;P33778;P23527;P06899;Q8N257;Q96A08	Q99879;Q99877;Q93079;Q5QNW6;P62807;P58876;P57053;O60814;Q5QNW6-2;Q99880;Q16778;P33778;P23527;P06899	Histone H2B type 1-M;Histone H2B type 1-N;Histone H2B type 1-H;Histone H2B type 2-F;Histone H2B type 1-C/E/F/G/I;Histone H2B type 1-D;Histone H2B type F-S;Histone H2B type 1-K;Histone H2B type 1-L;Histone H2B type 2-E;Histone H2B type 1-B;Histone H2B type 1-O;Histone H2B type 1-J	HIST1H2BM;HIST1H2BN;HIST1H2BH;HIST2H2BF;HIST1H2BC;HIST1H2BD;H2BFS;HIST1H2BK;HIST1H2BL;HIST2H2BE;HIST1H2BB;HIST1H2BO;HIST1H2BJ	-	-	-	-	0.10237	0.849793	28.0045	28.3367	27.2975	27.2861	28.1683	27.8772
O60888-3;O60888;O60888-2	O60888-3;O60888;O60888-2	Protein CutA	CUTA	-	-	-	YES	-0.61678	0.0237974	28.9369	29.2433	28.9853	29.6713	29.6518	29.6928
O75083;O75083-3	O75083;O75083-3	WD repeat-containing protein 1	WDR1	-	-	-	YES	-0.550003	0.0312249	28.9899	28.2883	28.6359	29.3222	29.1964	29.0456
O75223;O75223-3;O75223-2;O75223-4	O75223;O75223-3;O75223-2;O75223-4	Gamma-glutamylcyclotransferase	GGCT	-	-	-	YES	-1.02449	0.0051845	25.945	25.6861	25.7668	26.3229	27.5909	26.5575
O75312	O75312	Zinc finger protein ZPR1	ZPR1	-	-	-	-	-0.111817	0.721844	25.6922	25.1608	25.5128	25.5978	25.7141	25.3895
O75347;O75347-2	O75347;O75347-2	Tubulin-specific chaperone A	TBCA	-	-	-	-	-0.568627	0.0501537	27.7042	27.5144	27.9642	28.0288	28.4441	28.4159
O75369-8	O75369-8	Filamin-B	FLNB	-	-	-	YES	0.682333	0.00819405	31.0566	31.0926	30.8596	30.448	30.2613	30.2526
O75506	O75506	Heat shock factor-binding protein 1	HSBP1	-	-	-	-	-0.01556	0.966962	25.7745	25.6951	25.8954	26.0854	25.6752	25.6511
O75531	O75531	Barrier-to-autointegration factor;Barrier-to-autointegration factor, N-terminally processed	BANF1	-	-	-	-	-0.996307	0.162533	26.2201	24.3467	26.2608	26.8569	26.4182	26.5415
O75534-2;O75534;O75534-3;O75534-4	O75534-2;O75534;O75534-3;O75534-4	Cold shock domain-containing protein E1	CSDE1	-	-	-	-	0.06694	0.878195	25.3911	24.9653	25.6812	24.9839	25.5478	25.3051
O75688-4;O75688-2;O75688;O75688-3;P35813-2;O75688-5;P35813;P35813-3	O75688-4;O75688-2;O75688;O75688-3;P35813-2;O75688-5;P35813;P35813-3	Protein phosphatase 1B;Protein phosphatase 1A	PPM1B;PPM1A	-	-	-	-	-0.442677	0.10487	23.7957	23.7833	24.0822	24.2069	24.4433	24.3391
O75821	O75821	Eukaryotic translation initiation factor 3 subunit G	EIF3G	-	-	-	-	-0.55267	0.0930075	25.7583	25.8928	26.078	26.3361	26.6889	26.3622
O75822-3;O75822;O75822-2	O75822-3;O75822;O75822-2	Eukaryotic translation initiation factor 3 subunit J	EIF3J	-	-	-	-	0.0304033	0.967097	26.4388	26.7587	25.9869	26.1714	26.5466	26.3752
O75874	O75874	Isocitrate dehydrogenase [NADP] cytoplasmic	IDH1	-	-	-	YES	-0.655287	0.392017	24.1571	23.984	23.0721	24.458	25.2064	23.5146
O94760;O94760-2	O94760	N(G),N(G)-dimethylarginine dimethylaminohydrolase 1	DDAH1	-	-	-	YES	-0.359957	0.406877	27.207	25.7735	27.8105	27.0286	27.1476	27.6946
O94907;Q9UBU2	O94907	Dickkopf-related protein 1	DKK1	-	-	-	-	-1.23665	0.0355934	27.7628	27.3203	27.7342	28.0522	28.8428	29.6322
O94985-2	O94985-2	Calsyntenin-1;Soluble Alc-alpha;CTF1-alpha	CLSTN1	-	-	-	-	0.222517	0.366447	32.072	32.1528	32.3933	31.904	31.8806	32.1658
O95336	O95336	6-phosphogluconolactonase	PGLS	-	-	-	YES	-0.81675	0.217544	26.4169	26.898	25.9079	27.5139	27.488	26.6712
O95394;O95394-4;O95394-3	O95394;O95394-4;O95394-3	Phosphoacetylglucosamine mutase	PGM3	-	-	-	-	-0.915607	0.178037	25.4368	23.0527	25.5419	25.8449	25.3052	25.6281
O95433;O95433-2	O95433;O95433-2	Activator of 90 kDa heat shock protein ATPase homolog 1	AHSA1	-	-	-	YES	-0.13859	0.59028	26.5744	26.6155	26.2003	26.8779	26.4676	26.4605
O95757	O95757	Heat shock 70 kDa protein 4L	HSPA4L	-	-	-	-	-0.0487633	0.895871	25.5295	25.23	25.5695	25.6565	25.6712	25.1477
O95777	O95777	U6 snRNA-associated Sm-like protein LSm8	LSM8	-	-	-	-	-0.06106	0.816829	26.0827	26.1677	26.1679	26.3405	26.1283	26.1327
O95817	O95817	BAG family molecular chaperone regulator 3	BAG3	-	-	-	-	0.366833	0.486602	25.8028	25.2445	25.0955	23.9249	25.6473	25.4702
P00338;P00338-3;P00338-5;P00338-2;P00338-4;Q6ZMR3	P00338;P00338-3;P00338-5;P00338-2;P00338-4	L-lactate dehydrogenase A chain	LDHA	-	-	-	YES	-0.679073	0.255399	30.7357	30.7003	30.3339	31.7337	31.3398	30.7337
P00390-5;P00390-4;P00390-2;P00390-3;P00390	P00390-5;P00390-4;P00390-2;P00390-3;P00390	Glutathione reductase, mitochondrial	GSR	-	-	-	YES	-0.19655	0.556088	23.4437	24.2785	23.7255	23.872	24.43	23.7354
P00441	P00441	Superoxide dismutase [Cu-Zn]	SOD1	-	-	-	YES	0.84963	0.224263	26.4949	26.1398	26.6239	26.3984	23.5056	26.8057
P00491	P00491	Purine nucleoside phosphorylase	PNP	-	-	-	YES	-0.704987	0.400125	27.3675	27.1845	27.371	28.4098	28.1571	27.4711
P00492	P00492	Hypoxanthine-guanine phosphoribosyltransferase	HPRT1	-	-	-	YES	-0.198327	0.563474	27.3412	27.422	26.9376	27.9432	27.3094	27.0432
P00505-2;P00505	P00505-2;P00505	Aspartate aminotransferase, mitochondrial	GOT2	-	-	-	YES	-0.104203	0.817504	26.7283	27.2322	26.7844	27.2415	26.9847	26.8315
P00558;P00558-2;P07205	P00558;P00558-2	Phosphoglycerate kinase 1	PGK1	-	-	-	YES	-0.133377	0.625581	29.9544	29.8739	30.0592	30.1298	29.9411	30.2166
P01033	P01033	Metalloproteinase inhibitor 1	TIMP1	YES	Matrisome-associated	ECM Regulators	YES	0.708463	0.208384	29.8824	30.0478	29.8711	29.575	29.1918	28.9092
P01040	P01040	Cystatin-A;Cystatin-A, N-terminally processed	CSTA	YES	Matrisome-associated	ECM Regulators	-	-0.884143	0.278109	25.6186	25.3939	27.1731	26.3334	27.4403	27.0644
P01892;P10316;P30459;P01891;P10314;P30453;P16190;P16189;P30512;P30457;P30456;P30450;P18462;Q09160	P01892;P10316;P30459;P01891	HLA class I histocompatibility antigen, A-2 alpha chain;HLA class I histocompatibility antigen, A-69 alpha chain;HLA class I histocompatibility antigen, A-74 alpha chain;HLA class I histocompatibility antigen, A-68 alpha chain	HLA-A	-	-	-	-	-0.0119333	0.984008	30.2926	30.3655	30.5588	30.2137	30.3792	30.6598
P02452;CON__Q862S4	P02452	Collagen alpha-1(I) chain	COL1A1	YES	Core matrisome	Collagens	-	4.71085	2.7661e-06	29.0727	29.2635	30.5547	25.0289	24.9809	24.7486
P02545;P02545-6;P02545-3;P02545-5	P02545;P02545-6;P02545-3;P02545-5	Prelamin-A/C;Lamin-A/C	LMNA	-	-	-	-	0.234053	0.302693	31.5388	31.5126	31.702	31.2085	31.3188	31.524
P02751-17;P02751-3;P02751;P02751-6;P02751-5;P02751-10;P02751-9;P02751-14;P02751-8;P02751-7;P02751-15;P02751-13;P02751-11;P02751-4;P02751-12;P02751-16;P02751-2	P02751-17;P02751-3;P02751;P02751-6;P02751-5;P02751-10;P02751-9;P02751-14;P02751-8;P02751-7;P02751-15;P02751-13;P02751-11;P02751-4;P02751-12	Fibronectin;Anastellin;Ugl-Y1;Ugl-Y2;Ugl-Y3	FN1	YES	Core matrisome	ECM Glycoproteins	YES	0.9961	0.00999576	33.0405	33.8024	32.989	32.5015	32.3443	31.9978
P02786	P02786	Transferrin receptor protein 1;Transferrin receptor protein 1, serum form	TFRC	-	-	-	YES	-0.324287	0.696027	26.8458	26.7556	26.4313	27.45	26.8913	26.6642
P02794	P02794	Ferritin heavy chain;Ferritin heavy chain, N-terminally processed	FTH1	-	-	-	YES	0.599457	0.237304	29.7103	29.9478	30.1961	28.8089	29.3468	29.9002
P03956	P03956	Interstitial collagenase;22 kDa interstitial collagenase;27 kDa interstitial collagenase	MMP1	YES	Matrisome-associated	ECM Regulators	-	-7.40706	5.49309e-08	26.4402	26.9436	25.026	33.6998	34.2862	32.645
P04040	P04040	Catalase	CAT	-	-	-	YES	0.114323	0.690189	26.7642	26.5513	26.5973	26.281	26.8575	26.4314
P04075;P04075-2	P04075;P04075-2	Fructose-bisphosphate aldolase A	ALDOA	-	-	-	YES	-0.400057	0.146171	30.3013	29.8177	30.6545	30.5596	30.56	30.854
P04080	P04080	Cystatin-B	CSTB	YES	Matrisome-associated	ECM Regulators	YES	0.718117	0.133547	25.1453	25.2268	25.2824	23.2008	25.3614	24.938
P04114;REV__Q8IXS0	P04114	Apolipoprotein B-100;Apolipoprotein B-48	APOB	-	-	-	YES	0.0939067	0.882628	26.2939	26.0624	26.0156	26.2385	25.6436	26.208
P04179-4;P04179-2;P04179;P04179-3	P04179-4;P04179-2;P04179;P04179-3	Superoxide dismutase [Mn], mitochondrial	SOD2	-	-	-	YES	-0.176897	0.612622	24.325	23.8605	23.4804	24.0315	23.9363	24.2288
P04406;P04406-2;O14556	P04406;P04406-2	Glyceraldehyde-3-phosphate dehydrogenase	GAPDH	-	-	-	YES	-0.10709	0.640097	30.0996	30.434	30.0045	30.2939	30.693	29.8724
P04792	P04792	Heat shock protein beta-1	HSPB1	-	-	-	YES	-1.01121	0.106294	24.9411	26.1285	24.7727	26.9108	25.9403	26.0248
P05023-3;P05023-4;P05023;P05023-2;P13637;P13637-2;P13637-3;P50993;Q13733;P20648	P05023-3;P05023-4;P05023;P05023-2	Sodium/potassium-transporting ATPase subunit alpha-1	ATP1A1	-	-	-	YES	0.191807	0.746777	25.8921	26.1183	25.6774	25.8182	25.7971	25.497
P05067-7;P05067-11;P05067-8;P05067-9;P05067;P05067-3;P05067-4;P05067-5;P05067-6;P05067-10;P05067-2	P05067-7;P05067-11;P05067-8;P05067-9;P05067;P05067-3;P05067-4;P05067-5;P05067-6;P05067-10	Amyloid beta A4 protein;N-APP;Soluble APP-alpha;Soluble APP-beta;C99;Beta-amyloid protein 42;Beta-amyloid protein 40;C83;P3(42);P3(40);C80;Gamma-secretase C-terminal fragment 59;Gamma-secretase C-terminal fragment 57;Gamma-secretase C-terminal fragment 50;C31	APP	-	-	-	YES	0.113473	0.716331	32.6654	33.1559	33.3884	32.5105	33.1066	33.2522
P05121;P05121-2	P05121;P05121-2	Plasminogen activator inhibitor 1	SERPINE1	YES	Matrisome-associated	ECM Regulators	YES	-1.47814	0.0181758	31.6457	31.0387	30.8347	33.3395	32.6181	31.9959
P05198	P05198	Eukaryotic translation initiation factor 2 subunit 1	EIF2S1	-	-	-	YES	-0.130893	0.590665	27.3418	27.0515	27.2821	27.3085	27.3736	27.386
P05386	P05386	60S acidic ribosomal protein P1	RPLP1	-	-	-	-	0.230263	0.857812	28.0883	26.7878	23.6883	24.2592	27.8491	25.7654
P05387	P05387	60S acidic ribosomal protein P2	RPLP2	-	-	-	YES	-0.288257	0.310359	29.4992	29.3707	29.1693	29.7173	29.4749	29.7117
P05388;P05388-2;Q8NHW5	P05388;P05388-2;Q8NHW5	60S acidic ribosomal protein P0;60S acidic ribosomal protein P0-like	RPLP0;RPLP0P6	-	-	-	-	-0.44315	0.179896	26.5282	26.1475	25.8139	27.2097	26.6094	26
P05455	P05455	Lupus La protein	SSB	-	-	-	-	-1.25986	0.00397239	25.7523	25.4851	24.5194	26.6694	26.6482	26.2189
P05783;CON__H-INV:HIT000015463	P05783	Keratin, type I cytoskeletal 18	KRT18	-	-	-	YES	0.63032	0.0730715	31.0743	31.1753	31.0061	30.2713	30.6125	30.481
P06280	P06280	Alpha-galactosidase A	GLA	-	-	-	YES	0.671943	0.0381198	27.3548	27.0328	27.134	26.6538	26.8416	26.0104
P06396-2;P06396-4;P06396-3;P06396	P06396-2;P06396-4;P06396-3;P06396	Gelsolin	GSN	-	-	-	YES	0.57108	0.194797	28.1889	28.3006	29.0112	27.5004	27.5938	28.6932
P06454-2;P06454	P06454-2;P06454	Prothymosin alpha;Prothymosin alpha, N-terminally processed;Thymosin alpha-1	PTMA	-	-	-	-	-0.86002	0.20884	29.2024	29.5017	31.1618	29.1862	31.3333	31.9265
P06576	P06576	ATP synthase subunit beta, mitochondrial	ATP5B	-	-	-	-	0.30081	0.315678	28.8224	29.2732	28.4344	28.4181	28.5738	28.6357
P06703	P06703	Protein S100-A6	S100A6	YES	Matrisome-associated	Secreted Factors	YES	0.385193	0.617283	32.6986	31.964	32.0736	31.4904	31.8259	32.2645
P06733;P06733-2;P13929-3;P13929-2;P13929	P06733;P06733-2	Alpha-enolase	ENO1	-	-	-	YES	-0.0713267	0.734231	32.2603	32.2793	32.4248	32.4859	32.3406	32.3519
P06744;P06744-2;CON__Q3ZBD7;Q8N196	P06744;P06744-2	Glucose-6-phosphate isomerase	GPI	-	-	-	YES	0.18819	0.551077	28.8954	28.8394	28.3908	28.9461	28.472	28.1429
P06748-2;P06748;P06748-3	P06748-2;P06748;P06748-3	Nucleophosmin	NPM1	-	-	-	-	-0.96081	0.00430249	31.0726	30.7126	31.0805	31.8766	31.8291	32.0425
P06753-2;P06753-3;P06753-6;P06753-5;P06753-4;P06753-7	P06753-2;P06753-3;P06753-6;P06753-5;P06753-4	Tropomyosin alpha-3 chain	TPM3	-	-	-	YES	0.173257	0.528502	31.5684	31.5405	31.7608	31.1282	31.3602	31.8615
P06865;P06865-2	P06865	Beta-hexosaminidase subunit alpha	HEXA	-	-	-	YES	1.29382	0.0116939	29.1123	29.4125	29.029	28.1503	27.9563	27.5657
P07237	P07237	Protein disulfide-isomerase	P4HB	-	-	-	YES	-0.0818667	0.717491	29.9967	29.7815	29.8303	29.9241	29.6571	30.273
P07339	P07339	Cathepsin D;Cathepsin D light chain;Cathepsin D heavy chain	CTSD	YES	Matrisome-associated	ECM Regulators	YES	0.914963	0.00268444	30.9366	31.3244	31.0184	30.2431	30.3404	29.951
P07355;P07355-2;A6NMY6	P07355;P07355-2;A6NMY6	Annexin A2;Putative annexin A2-like protein	ANXA2;ANXA2P2	-	-	-	-	-0.106977	0.793342	28.899	29.2011	28.0956	29.3308	29.1806	28.0053
P07437;A6NNZ2	P07437	Tubulin beta chain	TUBB	-	-	-	YES	0.00294667	0.989974	31.088	31.1916	30.6751	31.1419	30.9655	30.8385
P07602;P07602-2;P07602-3	P07602;P07602-2;P07602-3	Prosaposin;Saposin-A;Saposin-B-Val;Saposin-B;Saposin-C;Saposin-D	PSAP	-	-	-	YES	1.61646	0.0053273	29.5904	29.9635	29.589	28.3102	28.1091	27.8742
P07686	P07686	Beta-hexosaminidase subunit beta;Beta-hexosaminidase subunit beta chain B;Beta-hexosaminidase subunit beta chain A	HEXB	-	-	-	YES	0.4287	0.172339	30.0262	30.1346	29.6698	29.6841	29.5472	29.313
P07711	P07711	Cathepsin L1;Cathepsin L1 heavy chain;Cathepsin L1 light chain	CTSL	-	-	-	YES	0.39438	0.123768	28.5034	28.4333	28.5417	28.0301	27.9323	28.3329
P07737;CON__P02584	P07737	Profilin-1	PFN1	-	-	-	YES	-0.547473	0.159056	28.82	28.534	27.9743	29.3666	29.1227	28.4814
P07741;P07741-2	P07741;P07741-2	Adenine phosphoribosyltransferase	APRT	-	-	-	YES	0.10419	0.850772	24.6303	24.6261	24.1512	24.5374	24.4874	24.0702
P07900;P07900-2;Q14568;Q58FG0;Q58FG1	P07900;P07900-2	Heat shock protein HSP 90-alpha	HSP90AA1	-	-	-	YES	0.21195	0.395205	31.1592	31.3936	31.3254	31.0083	30.9939	31.2402
P07910-2;P07910-4;P07910;P07910-3;P0DMR1;O60812;B7ZW38;B2RXH8	P07910-2;P07910-4;P07910;P07910-3	Heterogeneous nuclear ribonucleoproteins C1/C2	HNRNPC	-	-	-	YES	-0.39849	0.3542	28.0362	27.0508	27.1352	27.9913	28.0556	27.3707
P07942	P07942	Laminin subunit beta-1	LAMB1	YES	Core matrisome	ECM Glycoproteins	YES	3.27813	1.47107e-06	30.5714	30.3778	30.8886	27.2266	27.2759	27.5009
P07996;P07996-2	P07996;P07996-2	Thrombospondin-1	THBS1	YES	Core matrisome	ECM Glycoproteins	YES	0.06875	0.75364	34.0553	34.4143	34.2603	34.2489	34.1773	34.0974
P08123	P08123	Collagen alpha-2(I) chain	COL1A2	YES	Core matrisome	Collagens	YES	0.35464	0.545502	25.1765	24.5338	25.2046	24.7365	23.9366	25.1779
P08133;P08133-2	P08133;P08133-2	Annexin A6	ANXA6	YES	Matrisome-associated	ECM-affiliated Proteins	YES	0.16054	0.669725	26.1896	26.2563	25.9791	26.0427	26.2602	25.6405
P08195-3;P08195;P08195-4	P08195-3;P08195;P08195-4	4F2 cell-surface antigen heavy chain	SLC3A2	-	-	-	YES	0.89322	0.223538	28.4552	28.5093	28.2015	27.5359	27.607	27.3435
P08238;Q58FF7;Q92538-3;Q92538-2;Q92538	P08238	Heat shock protein HSP 90-beta	HSP90AB1	-	-	-	YES	-0.348337	0.182904	33.2004	33.1519	33.1561	33.4519	33.4954	33.6062
P08603;P08603-2;Q03591	P08603;P08603-2	Complement factor H	CFH	-	-	-	YES	0.57516	0.228928	27.9357	28.3897	28.5582	27.5218	27.6375	27.999
P08621-2;P08621;P08621-3;P08621-4	P08621-2;P08621;P08621-3	U1 small nuclear ribonucleoprotein 70 kDa	SNRNP70	-	-	-	-	-0.126277	0.78905	26.4788	26.7012	25.951	26.11	26.8145	26.5853
P08758	P08758	Annexin A5	ANXA5	YES	Matrisome-associated	ECM-affiliated Proteins	YES	0.462787	0.362327	28.4665	28.5422	27.7668	27.9049	27.9693	27.5129
P08865	P08865	40S ribosomal protein SA	RPSA	-	-	-	YES	-0.05157	0.87542	29.1345	29.1386	28.488	29.1107	29.0505	28.7545
P09104-2;P09104	P09104-2;P09104	Gamma-enolase	ENO2	-	-	-	YES	1.63846	0.00249441	27.8858	27.6375	26.8539	25.706	25.7293	26.0265
P09382	P09382	Galectin-1	LGALS1	YES	Matrisome-associated	ECM-affiliated Proteins	YES	0.16488	0.622939	29.672	29.5202	29.4094	29.7473	29.4304	28.9293
P09429;B2RPK0	P09429	High mobility group protein B1	HMGB1	-	-	-	-	-0.531537	0.162999	26.9515	26.0666	25.9025	27.5549	26.5023	26.4579
P09493-3;P09493-4;P09493-10;P09493-9;P09493-8;P09493	P09493-3;P09493-4;P09493-10;P09493-9;P09493-8;P09493	Tropomyosin alpha-1 chain	TPM1	-	-	-	-	0.274043	0.757593	27.1758	27.1973	27.1563	26.8226	26.917	26.9677
P09493-5	P09493-5	Tropomyosin alpha-1 chain	TPM1	-	-	-	-	0.89859	0.111511	28.0741	27.781	28.0269	26.6294	27.0616	27.4953
P09496-2;P09496-4;P09496-3;P09496;P09496-5	P09496-2;P09496-4;P09496-3;P09496;P09496-5	Clathrin light chain A	CLTA	-	-	-	-	0.0276033	0.91173	27.7121	27.439	27.6766	27.5952	27.5412	27.6085
P09497-2;P09497	P09497-2;P09497	Clathrin light chain B	CLTB	-	-	-	-	0.07665	0.855311	25.6876	25.4045	25.5964	25.8288	25.6699	24.9599
P09651-3;P09651-2;P09651;Q32P51	P09651-3;P09651-2;P09651;Q32P51	Heterogeneous nuclear ribonucleoprotein A1;Heterogeneous nuclear ribonucleoprotein A1, N-terminally processed;Heterogeneous nuclear ribonucleoprotein A1-like 2	HNRNPA1;HNRNPA1L2	-	-	-	-	0.11883	0.748132	28.9968	29.0452	29.1286	28.9569	29.0934	28.7638
P09972	P09972	Fructose-bisphosphate aldolase C	ALDOC	-	-	-	YES	0.673413	0.117596	25.7029	25.9752	25.432	24.6127	25.1886	25.2885
P62987;P62979;P0CG47;P0CG48	P62987;P62979;P0CG47;P0CG48	Ubiquitin-60S ribosomal protein L40;Ubiquitin;60S ribosomal protein L40;Ubiquitin-40S ribosomal protein S27a;Ubiquitin;40S ribosomal protein S27a;Polyubiquitin-B;Ubiquitin;Polyubiquitin-C;Ubiquitin	UBA52;RPS27A;UBB;UBC	-	-	-	-	-0.16581	0.607398	29.0325	28.7487	29.4437	29.1483	29.4745	29.0994
P0DMV9;P0DMV8;P0DMV8-2	P0DMV9;P0DMV8;P0DMV8-2	Heat shock 70 kDa protein 1B;Heat shock 70 kDa protein 1A	HSPA1B;HSPA1A	-	-	-	-	-0.59424	0.0133363	28.3996	28.4198	28.1729	29.0446	28.8127	28.9177
P0DP25;P0DP24;P0DP23;P27482;P02585	P0DP25;P0DP24;P0DP23			-	-	-	-	-0.0844833	0.80404	31.6317	31.3491	31.4584	31.6619	31.5057	31.5251
P10253	P10253	Lysosomal alpha-glucosidase;76 kDa lysosomal alpha-glucosidase;70 kDa lysosomal alpha-glucosidase	GAA	-	-	-	YES	1.45428	0.0180722	27.3199	28.036	27.0507	26.2508	26.1334	25.6595
P10586-2;P10586	P10586-2;P10586	Receptor-type tyrosine-protein phosphatase F	PTPRF	-	-	-	YES	-0.940963	0.00421082	26.8122	27.5712	27.3712	28.0035	28.2939	28.28
P10599;P10599-2	P10599;P10599-2	Thioredoxin	TXN	-	-	-	YES	-0.37795	0.261585	29.0703	28.8158	29.452	29.0623	29.7361	29.6735
P10644;P10644-2	P10644;P10644-2	cAMP-dependent protein kinase type I-alpha regulatory subunit;cAMP-dependent protein kinase type I-alpha regulatory subunit, N-terminally processed	PRKAR1A	-	-	-	-	-0.350493	0.2531	25.4363	25.5977	25.0953	25.7285	26.1609	25.2913
P10809;P10809-2	P10809	60 kDa heat shock protein, mitochondrial	HSPD1	-	-	-	YES	-0.59545	0.0475144	28.4597	28.3085	28.2923	28.8805	28.8538	29.1126
P10909-4;P10909;P10909-5;P10909-2;P10909-3	P10909-4;P10909;P10909-5;P10909-2;P10909-3	Clusterin;Clusterin beta chain;Clusterin alpha chain	CLU	-	-	-	YES	0.88562	0.00730869	30.167	31.0358	30.5282	29.5703	29.6253	29.8786
P11021	P11021	78 kDa glucose-regulated protein	HSPA5	-	-	-	YES	-0.02159	0.911171	30.5709	30.5884	30.5265	30.5849	30.5421	30.6235
P11047	P11047	Laminin subunit gamma-1	LAMC1	YES	Core matrisome	ECM Glycoproteins	YES	2.01687	3.41062e-05	30.6668	31.3667	31.0968	29.0096	29.3208	28.7493
P11142;P11142-2;P54652	P11142;P11142-2	Heat shock cognate 71 kDa protein	HSPA8	-	-	-	YES	-0.316513	0.143635	32.1558	32.089	32.0148	32.4582	32.3428	32.4083
P11216;P11217-2;P11217	P11216	Glycogen phosphorylase, brain form	PYGB	-	-	-	YES	0.126123	0.814938	27.3328	26.9651	26.7204	27.4004	27.0105	26.229
P11413;P11413-2;P11413-3	P11413;P11413-2;P11413-3	Glucose-6-phosphate 1-dehydrogenase	G6PD	-	-	-	YES	0.28284	0.339594	28.0361	27.863	27.4169	27.9128	27.6273	26.9274
P11586;Q6UB35	P11586	C-1-tetrahydrofolate synthase, cytoplasmic;Methylenetetrahydrofolate dehydrogenase;Methenyltetrahydrofolate cyclohydrolase;Formyltetrahydrofolate synthetase;C-1-tetrahydrofolate synthase, cytoplasmic, N-terminally processed	MTHFD1	-	-	-	YES	0.13184	0.73943	26.1756	25.8673	25.3159	25.9062	25.7092	25.3478
P11717	P11717	Cation-independent mannose-6-phosphate receptor	IGF2R	-	-	-	YES	-0.0621433	0.87027	27.122	26.8514	27.5095	27.01	27.2632	27.3961
P11940-2;P11940;Q9H361;Q13310-2;Q13310;Q13310-3;Q4VXU2;Q4VXU2-2;Q5JQF8;Q96DU9-2;Q96DU9	P11940-2;P11940;Q9H361	Polyadenylate-binding protein 1;Polyadenylate-binding protein 3	PABPC1;PABPC3	-	-	-	-	-0.425513	0.242356	28.1366	28.1694	27.7497	28.643	28.4789	28.2103
P12004	P12004	Proliferating cell nuclear antigen	PCNA	-	-	-	YES	-0.0486167	0.872134	27.9833	27.5257	28.1508	27.6126	28.0391	28.1538
P12081-4;P12081;P12081-3;P12081-2	P12081-4;P12081;P12081-3;P12081-2	Histidine--tRNA ligase, cytoplasmic	HARS	-	-	-	-	-0.1697	0.78994	27.401	27.3763	27.1784	27.7607	27.4109	27.2933
P12109	P12109	Collagen alpha-1(VI) chain	COL6A1	YES	Core matrisome	Collagens	YES	2.84991	8.80099e-08	32.7298	33.2865	33.2843	30.0441	30.2574	30.4493
P12268;P20839-2;P20839-4;P20839;P20839-3;P20839-7;P20839-5;P20839-6	P12268	Inosine-5-monophosphate dehydrogenase 2	IMPDH2	-	-	-	YES	0.0834967	0.733188	27.277	26.6803	26.986	27.0244	26.8634	26.805
P12270;P12270-2	P12270;P12270-2	Nucleoprotein TPR	TPR	-	-	-	-	0.445243	0.298218	26.0459	26.0193	25.51	25.5421	25.6082	25.089
P12814;P12814-3;P12814-2;P12814-4;P35609-2;P35609	P12814;P12814-3;P12814-2;P12814-4	Alpha-actinin-1	ACTN1	-	-	-	YES	0.100963	0.676698	31.028	30.6153	30.6883	30.8491	30.5131	30.6665
P12956;P12956-2	P12956;P12956-2	X-ray repair cross-complementing protein 6	XRCC6	-	-	-	-	-0.235717	0.567698	28.3406	28.4257	27.8626	28.5217	28.5402	28.2741
P13010	P13010	X-ray repair cross-complementing protein 5	XRCC5	-	-	-	-	-0.355247	0.4325	28.4695	27.9412	28.0422	28.7676	28.4371	28.314
P13489	P13489	Ribonuclease inhibitor	RNH1	-	-	-	YES	-0.468663	0.309124	27.7615	27.4258	28.1324	28.1457	28.2108	28.3693
P13639	P13639	Elongation factor 2	EEF2	-	-	-	YES	0.760067	0.00737773	30.8079	30.5443	30.7541	30.205	29.872	29.7491
P13667	P13667	Protein disulfide-isomerase A4	PDIA4	-	-	-	-	-0.349873	0.244052	27.704	27.4047	27.7113	27.8701	27.8614	28.1381
P13693;P13693-2;Q56UQ5	P13693;P13693-2	Translationally-controlled tumor protein	TPT1	-	-	-	YES	-0.475593	0.137893	27.5325	27.5974	28.068	27.9988	28.127	28.4989
P13798	P13798	Acylamino-acid-releasing enzyme	APEH	-	-	-	YES	1.0026	0.0616589	26.515	24.4895	26.2618	25.3683	24.263	24.6272
P13861-2;P13861	P13861-2;P13861	cAMP-dependent protein kinase type II-alpha regulatory subunit	PRKAR2A	-	-	-	YES	-0.0485	0.864552	31.2998	30.9985	30.8703	31.2384	31.0876	30.9882
P14314-2;P14314	P14314-2;P14314	Glucosidase 2 subunit beta	PRKCSH	-	-	-	-	-0.49409	0.079092	28.9775	28.785	29.2314	29.4103	29.2184	29.8475
P14324-2;P14324	P14324-2;P14324	Farnesyl pyrophosphate synthase	FDPS	-	-	-	-	0.296853	0.294973	28.2181	28.064	27.5673	27.7312	27.8146	27.4129
P14618;P14618-2;P14618-3;P30613-2;P30613	P14618;P14618-2;P14618-3	Pyruvate kinase PKM	PKM	-	-	-	YES	-0.24268	0.357377	31.4487	31.3031	31.0985	31.7381	31.5519	31.2883
P14625;Q58FF3	P14625	Endoplasmin	HSP90B1	-	-	-	YES	-0.580823	0.0110632	30.1026	29.8965	30.1056	30.6059	30.4355	30.8059
P14866;P14866-2	P14866;P14866-2	Heterogeneous nuclear ribonucleoprotein L	HNRNPL	-	-	-	YES	-0.50229	0.38018	27.2318	27.0352	26.924	27.3152	27.7461	27.6365
P14868;P14868-2	P14868;P14868-2	Aspartate--tRNA ligase, cytoplasmic	DARS	-	-	-	YES	-0.21346	0.575524	26.3496	26.1867	25.9075	26.2735	26.5019	26.3088
P15151-3;P15151-2;P15151-4;P15151	P15151-3;P15151-2;P15151-4;P15151	Poliovirus receptor	PVR	-	-	-	-	-1.4202	0.0768576	27.2524	27.9141	28.4689	28.5174	29.0487	30.33
P15170-2;P15170-3;P15170;Q8IYD1	P15170-2;P15170-3;P15170;Q8IYD1	Eukaryotic peptide chain release factor GTP-binding subunit ERF3A;Eukaryotic peptide chain release factor GTP-binding subunit ERF3B	GSPT1;GSPT2	-	-	-	-	0.02176	0.973608	23.485	26.1992	25.9568	24.0014	25.6984	25.8759
P15291-2;P15291	P15291-2;P15291	Beta-1,4-galactosyltransferase 1;Lactose synthase A protein;N-acetyllactosamine synthase;Beta-N-acetylglucosaminylglycopeptide beta-1,4-galactosyltransferase;Beta-N-acetylglucosaminyl-glycolipid beta-1,4-galactosyltransferase;Processed beta-1,4-galactosyltransferase 1	B4GALT1	-	-	-	YES	0.01543	0.980234	26.3589	26.8957	26.7695	26.9774	26.4827	26.5177
P15311	P15311	Ezrin	EZR	-	-	-	YES	-0.258523	0.346293	28.3762	28.2395	28.8039	28.5242	28.7648	28.906
P15374	P15374	Ubiquitin carboxyl-terminal hydrolase isozyme L3	UCHL3	-	-	-	-	-0.17924	0.772038	28.179	27.7419	27.7615	28.0144	28.0698	28.136
P15586;P15586-2	P15586;P15586-2	N-acetylglucosamine-6-sulfatase	GNS	-	-	-	YES	0.597433	0.0137918	27.9973	28.2502	27.8308	27.4425	27.5745	27.2689
P15880	P15880	40S ribosomal protein S2	RPS2	-	-	-	YES	-0.407297	0.244631	24.5194	24.1224	23.9159	25.1899	24.6226	23.9671
P15924;P15924-3;P15924-2	P15924;P15924-3;P15924-2	Desmoplakin	DSP	-	-	-	YES	-1.49889	0.287927	26.3017	23.946	25.1089	25.5987	30.1636	24.091
P16035	P16035	Metalloproteinase inhibitor 2	TIMP2	YES	Matrisome-associated	ECM Regulators	-	-0.191733	0.678042	29.4666	29.5499	29.822	29.6702	30.042	29.7015
P16070-18;P16070-12;P16070-14;P16070-13;P16070-11;P16070-10;P16070-16;P16070-8;P16070-17;P16070-6;P16070-4;P16070-3;P16070-7;P16070-5;P16070;P16070-15;P16070-9;P16070-19	P16070-18;P16070-12;P16070-14;P16070-13;P16070-11;P16070-10;P16070-16;P16070-8;P16070-17;P16070-6;P16070-4;P16070-3;P16070-7;P16070-5;P16070;P16070-15;P16070-9	CD44 antigen	CD44	-	-	-	YES	-0.84251	0.00935596	29.8224	30.1836	30.3026	30.7195	30.8946	31.2221
P16152;P16152-2	P16152;P16152-2	Carbonyl reductase [NADPH] 1	CBR1	-	-	-	YES	0.15978	0.656095	25.8986	25.9168	25.7608	25.8816	25.8903	25.3249
P16403	P16403	Histone H1.2	HIST1H1C	-	-	-	-	-0.148553	0.716511	26.2536	25.3058	25.1741	25.8973	25.6752	25.6066
P16870-2;P16870	P16870-2;P16870	Carboxypeptidase E	CPE	-	-	-	YES	2.98286	4.53408e-07	29.4467	29.9928	29.9328	26.5307	26.8227	27.0703
P16949;P16949-2	P16949;P16949-2	Stathmin	STMN1	-	-	-	YES	-0.0679167	0.808301	28.501	28.374	28.2615	28.4919	28.5108	28.3375
P17174;P17174-2	P17174;P17174-2	Aspartate aminotransferase, cytoplasmic	GOT1	-	-	-	YES	-0.0508767	0.819698	28.6162	28.5652	28.4904	28.7187	28.6801	28.4255
P17931	P17931	Galectin-3	LGALS3	YES	Matrisome-associated	ECM-affiliated Proteins	YES	0.794867	0.131014	26.0821	27.0427	26.0857	26.076	25.4377	25.3122
P17936;P17936-2	P17936;P17936-2	Insulin-like growth factor-binding protein 3	IGFBP3	YES	Core matrisome	ECM Glycoproteins	-	-1.69285	0.00043978	28.1518	28.0309	28.2467	29.8181	29.8267	29.8632
P17980	P17980	26S protease regulatory subunit 6A	PSMC3	-	-	-	-	0.116493	0.62869	27.2954	27.1662	26.8839	26.9857	27.0735	26.937
P17987	P17987	T-complex protein 1 subunit alpha	TCP1	-	-	-	YES	-0.241717	0.307269	28.6196	28.7684	28.5556	28.8468	28.904	28.918
P18085	P18085	ADP-ribosylation factor 4	ARF4	-	-	-	YES	0.431447	0.466028	26.5486	25.6127	25.0948	25.5124	25.3406	25.1089
P18206-2;P18206;P18206-3	P18206-2;P18206	Vinculin	VCL	-	-	-	YES	0.646293	0.00539508	30.238	30.3156	30.1044	29.7041	29.4558	29.5591
P18669;P15259;Q8N0Y7	P18669;P15259	Phosphoglycerate mutase 1;Phosphoglycerate mutase 2	PGAM1;PGAM2	-	-	-	-	0.2349	0.351079	30.5818	30.3265	30.7733	30.0305	30.4428	30.5035
P19105;O14950;P24844;P24844-2	P19105;O14950	Myosin regulatory light chain 12A;Myosin regulatory light chain 12B	MYL12A;MYL12B	-	-	-	-	-0.181533	0.47154	28.3656	28.2048	27.9411	28.5605	28.279	28.2166
P19338	P19338	Nucleolin	NCL	-	-	-	YES	-0.76566	0.0023312	30.7092	30.6238	30.7285	31.4848	31.396	31.4776
P19623	P19623	Spermidine synthase	SRM	-	-	-	-	0.384137	0.0872327	27.2551	26.5729	26.9096	26.3958	26.6728	26.5167
P20290-2;P20290	P20290-2;P20290	Transcription factor BTF3	BTF3	-	-	-	-	0.107797	0.859894	26.203	26.1063	25.3588	26.056	25.9348	25.354
P20618	P20618	Proteasome subunit beta type-1	PSMB1	-	-	-	YES	-0.28315	0.563977	26.2243	26.138	26.0482	26.4593	26.5555	26.2452
P20700	P20700	Lamin-B1	LMNB1	-	-	-	-	0.0913533	0.741234	27.6197	27.6359	27.4614	27.4888	27.6237	27.3305
P20810-3;P20810-4;P20810-8;P20810-2;P20810;P20810-9;P20810-5;P20810-10;P20810-7;P20810-6	P20810-3;P20810-4;P20810-8;P20810-2;P20810;P20810-9;P20810-5;P20810-10;P20810-7;P20810-6	Calpastatin	CAST	-	-	-	-	-0.116097	0.654651	26.5478	26.699	26.534	26.7281	26.737	26.664
P20933	P20933	N(4)-(beta-N-acetylglucosaminyl)-L-asparaginase;Glycosylasparaginase alpha chain;Glycosylasparaginase beta chain	AGA	-	-	-	-	0.412113	0.19411	27.651	28.1015	27.8533	27.4063	27.3993	27.5638
P21281;P15313	P21281	V-type proton ATPase subunit B, brain isoform	ATP6V1B2	-	-	-	YES	0.0414467	0.858386	26.0935	26.0517	26.138	26.3069	26.2746	25.5773
P21333-2;P21333	P21333-2;P21333	Filamin-A	FLNA	-	-	-	YES	-0.08591	0.664827	31.5019	31.3991	31.3609	31.6638	31.4646	31.3911
P22061;P22061-2	P22061;P22061-2	Protein-L-isoaspartate(D-aspartate) O-methyltransferase	PCMT1	-	-	-	YES	-0.40679	0.143885	27.5985	27.2404	27.4443	27.9992	27.7115	27.7929
P22102;P22102-2	P22102;P22102-2	Trifunctional purine biosynthetic protein adenosine-3;Phosphoribosylamine--glycine ligase;Phosphoribosylformylglycinamidine cyclo-ligase;Phosphoribosylglycinamide formyltransferase	GART	-	-	-	YES	-0.412587	0.153038	26.2978	26.2845	26.7235	26.7104	26.7914	27.0418
P22314-2;P22314	P22314-2;P22314	Ubiquitin-like modifier-activating enzyme 1	UBA1	-	-	-	YES	0.55801	0.0476468	28.7785	28.926	28.4315	28.2821	28.374	27.8058
P22392-2;P22392;O60361	P22392-2;P22392;O60361	Nucleoside diphosphate kinase B;Putative nucleoside diphosphate kinase	NME2;NME2P1	-	-	-	-	-0.143283	0.70206	29.5395	29.0106	29.4203	29.541	29.4705	29.3887
P22626	P22626	Heterogeneous nuclear ribonucleoproteins A2/B1	HNRNPA2B1	-	-	-	YES	-0.409903	0.181773	29.8404	29.8091	30.0289	30.1021	30.338	30.4681
P23246;P23246-2	P23246;P23246-2	Splicing factor, proline- and glutamine-rich	SFPQ	-	-	-	-	-0.32251	0.27333	28.5552	28.4461	28.2764	28.7968	28.923	28.5253
P23396;P23396-2	P23396;P23396-2	40S ribosomal protein S3	RPS3	-	-	-	YES	-0.276353	0.573506	26.3411	26.008	25.7022	26.7838	26.6402	25.4563
P23526;P23526-2	P23526;P23526-2	Adenosylhomocysteinase	AHCY	-	-	-	YES	-0.773967	0.005726	27.6009	27.1177	27.6745	28.3307	28.3631	28.0211
P23528	P23528	Cofilin-1	CFL1	-	-	-	YES	-0.111457	0.63314	30.836	30.7971	30.9396	30.9337	31.0992	30.874
P23588;P23588-2	P23588;P23588-2	Eukaryotic translation initiation factor 4B	EIF4B	-	-	-	-	0.07253	0.857088	27.9712	27.77	28.2903	27.5201	28.1236	28.1703
P24534	P24534	Elongation factor 1-beta	EEF1B2	-	-	-	-	-0.399713	0.314864	29.1119	27.8407	28.6462	29.3532	28.6121	28.8327
P24666;P24666-4;P24666-3;P24666-2	P24666;P24666-4;P24666-3;P24666-2	Low molecular weight phosphotyrosine protein phosphatase	ACP1	-	-	-	YES	0.0992267	0.807963	24.5673	23.9398	24.5304	24.2615	24.2391	24.2391
P24821;P24821-3;P24821-5;P24821-6	P24821;P24821-3;P24821-5;P24821-6	Tenascin	TNC	YES	Core matrisome	ECM Glycoproteins	-	-0.402733	0.600859	30.1002	30.5941	29.9369	31.0312	30.6755	30.1328
P25205;P25205-2	P25205;P25205-2	DNA replication licensing factor MCM3	MCM3	-	-	-	-	0.115557	0.920963	31.0133	30.1041	30.7496	30.6936	30.4428	30.3839
P25398	P25398	40S ribosomal protein S12	RPS12	-	-	-	-	-0.275263	0.308219	28.8067	28.1301	28.5036	28.881	28.7765	28.6086
P25685;P25685-2	P25685;P25685-2	DnaJ homolog subfamily B member 1	DNAJB1	-	-	-	YES	-0.315733	0.353881	25.3217	25.2703	24.6055	25.4158	25.63	25.0989
P25705;P25705-2;P25705-3	P25705;P25705-2;P25705-3	ATP synthase subunit alpha, mitochondrial	ATP5A1	-	-	-	-	-0.08205	0.913092	26.0477	25.9787	25.9899	26.0691	26.0965	26.097
P25786;P25786-2	P25786;P25786-2	Proteasome subunit alpha type-1	PSMA1	-	-	-	YES	-0.205603	0.400404	26.8807	26.7442	27.045	27.0867	27.1343	27.0658
P25787	P25787	Proteasome subunit alpha type-2	PSMA2	-	-	-	YES	-0.0560167	0.863703	26.6525	26.1014	26.0578	26.6158	26.2375	26.1265
P25788-2;P25788	P25788-2;P25788	Proteasome subunit alpha type-3	PSMA3	-	-	-	YES	-0.117213	0.559106	27.875	28.278	27.8263	28.0346	28.1482	28.1482
P25789;P25789-2	P25789;P25789-2	Proteasome subunit alpha type-4	PSMA4	-	-	-	YES	-0.369513	0.344567	27.5798	27.2542	27.2989	27.9276	27.9394	27.3745
P26038	P26038	Moesin	MSN	-	-	-	YES	-1.01795	0.00445897	30.3678	30.6822	30.6075	31.5634	31.6421	31.5058
P26373;P26373-2	P26373;P26373-2	60S ribosomal protein L13	RPL13	-	-	-	-	-0.701433	0.203038	25.6281	25.3126	25.9649	26.4802	25.8579	26.6717
P26583	P26583	High mobility group protein B2	HMGB2	-	-	-	-	-0.466373	0.348203	26.3476	26.0973	26.2351	26.8517	26.5842	26.6432
P26599;P26599-2;P26599-3	P26599;P26599-2;P26599-3	Polypyrimidine tract-binding protein 1	PTBP1	-	-	-	YES	-0.578043	0.413107	24.9381	24.9215	23.4859	24.8953	25.5834	24.6011
P26639;P26639-2;Q9BW92-2;Q9BW92	P26639;P26639-2	Threonine--tRNA ligase, cytoplasmic	TARS	-	-	-	YES	0.20853	0.411797	29.1536	28.9031	28.771	28.894	28.8498	28.4583
P26640;P26640-2	P26640	Valine--tRNA ligase	VARS	-	-	-	-	-0.306423	0.269925	25.2562	25.4433	24.8405	25.5836	25.5891	25.2865
P26641;P26641-2	P26641;P26641-2	Elongation factor 1-gamma	EEF1G	-	-	-	YES	0.0128067	0.984912	30.1126	29.6892	29.2377	30.1901	29.8465	28.9645
P27348	P27348	14-3-3 protein theta	YWHAQ	-	-	-	YES	-0.763	0.0080073	29.0706	29.1449	28.9594	29.7165	29.8384	29.909
P27708	P27708	CAD protein;Glutamine-dependent carbamoyl-phosphate synthase;Aspartate carbamoyltransferase;Dihydroorotase	CAD	-	-	-	YES	-0.418827	0.397177	26.9121	26.8098	26.9535	27.6178	27.5459	26.7681
P27797	P27797	Calreticulin	CALR	-	-	-	YES	-0.689437	0.00618024	29.7806	29.482	29.5925	30.1419	30.1744	30.6072
P27816-6;P27816;P27816-2;P27816-5;P27816-7;P27816-4	P27816-6;P27816;P27816-2;P27816-5	Microtubule-associated protein 4	MAP4	-	-	-	-	0.0536933	0.799929	27.8322	27.5778	27.5492	27.5766	27.6985	27.5231
P28066;P28066-2	P28066;P28066-2	Proteasome subunit alpha type-5	PSMA5	-	-	-	YES	-0.219707	0.371024	28.6613	28.6299	28.5148	28.9653	28.564	28.9358
P28070	P28070	Proteasome subunit beta type-4	PSMB4	-	-	-	YES	-0.458433	0.434903	26.1478	26.0913	25.928	26.3623	26.6996	26.4804
P28072	P28072	Proteasome subunit beta type-6	PSMB6	-	-	-	YES	-0.0870733	0.831736	28.9278	28.3868	28.6352	28.8303	28.6541	28.7265
P28482-2;P28482	P28482-2;P28482	Mitogen-activated protein kinase 1	MAPK1	-	-	-	-	-0.0215433	0.958223	26.4489	26.8457	26.1728	26.8022	26.8298	25.9
P28838-2;P28838	P28838-2;P28838	Cytosol aminopeptidase	LAP3	-	-	-	YES	-0.507187	0.0775318	26.9923	26.7153	26.4744	27.5818	27.2286	26.8931
P29401;P29401-2	P29401;P29401-2	Transketolase	TKT	-	-	-	YES	0.415827	0.128576	29.842	29.7524	29.3597	29.3925	29.2291	29.0851
P29508;P29508-2;P48594	P29508;P29508-2;P48594	Serpin B3;Serpin B4	SERPINB3;SERPINB4	-	-	-	-	-1.98482	0.0740139	24.15	22.5564	23.8658	24.5181	28.0108	23.9977
P29692;P29692-2;P29692-4	P29692;P29692-2;P29692-4	Elongation factor 1-delta	EEF1D	-	-	-	-	-0.698383	0.0707398	29.8626	29.5449	29.7448	30.321	30.3569	30.5696
P29966	P29966	Myristoylated alanine-rich C-kinase substrate	MARCKS	-	-	-	YES	-0.0932733	0.812302	25.9829	25.7912	26.4689	25.5545	26.082	26.8864
P30040;P30040-2	P30040	Endoplasmic reticulum resident protein 29	ERP29	-	-	-	-	-0.729737	0.0118029	27.0327	26.8999	27.3622	27.8298	27.7657	27.8884
P30041	P30041	Peroxiredoxin-6	PRDX6	-	-	-	YES	0.0646033	0.881511	28.7975	28.3528	28.249	28.8185	28.4778	27.9091
P30044-2;P30044-3;P30044;P30044-4	P30044-2;P30044-3;P30044;P30044-4	Peroxiredoxin-5, mitochondrial	PRDX5	-	-	-	YES	0.0772433	0.892938	25.2542	25.8588	25.3565	25.8608	25.5923	24.7846
P30048-2;P30048	P30048-2;P30048	Thioredoxin-dependent peroxide reductase, mitochondrial	PRDX3	-	-	-	-	-0.249263	0.484964	27.9402	28.3831	27.7167	28.3701	28.1543	28.2633
P30050;P30050-2	P30050;P30050-2	60S ribosomal protein L12	RPL12	-	-	-	YES	-0.400553	0.499512	25.7641	25.3788	25.0121	26.4319	25.654	25.2706
P30085;P30085-2	P30085;P30085-2	UMP-CMP kinase	CMPK1	-	-	-	YES	-0.586273	0.325652	25.4797	24.925	25.3489	25.6916	25.8278	25.9931
P30086	P30086	Phosphatidylethanolamine-binding protein 1;Hippocampal cholinergic neurostimulating peptide	PEBP1	-	-	-	YES	-0.891723	0.0175022	26.4421	25.6236	26.4585	27.2224	27.1218	26.8552
P30101	P30101	Protein disulfide-isomerase A3	PDIA3	-	-	-	YES	-0.331277	0.214113	29.6539	29.5367	29.8194	29.9571	29.8232	30.2235
P30153;P30154-4;P30154;P30154-2;P30154-5;P30154-3	P30153	Serine/threonine-protein phosphatase 2A 65 kDa regulatory subunit A alpha isoform	PPP2R1A	-	-	-	YES	-0.23592	0.419121	28.7836	28.5946	28.5576	29.0138	28.8603	28.7695
P30520	P30520	Adenylosuccinate synthetase isozyme 2	ADSS	-	-	-	YES	0.000976667	0.998711	26.5577	26.9256	26.0065	26.8976	26.5672	26.0221
P31150	P31150	Rab GDP dissociation inhibitor alpha	GDI1	-	-	-	-	0.37	0.149949	28.1211	28.5116	27.9375	27.9205	27.734	27.8056
P31153;P31153-2;Q00266	P31153;P31153-2	S-adenosylmethionine synthase isoform type-2	MAT2A	-	-	-	-	-0.675713	0.00592447	27.5364	27.3026	27.5023	27.9785	28.2339	28.1561
P31431-2;P31431	P31431-2;P31431	Syndecan-4	SDC4	YES	Matrisome-associated	ECM-affiliated Proteins	YES	0.460853	0.169519	29.1866	29.6027	29.8847	28.5164	29.1779	29.5971
P31939-2;P31939	P31939-2;P31939	Bifunctional purine biosynthesis protein PURH;Phosphoribosylaminoimidazolecarboxamide formyltransferase;IMP cyclohydrolase	ATIC	-	-	-	YES	-0.84018	0.0181417	26.7924	27.1541	26.6228	27.9465	27.5351	27.6082
P31942-3;P31942-2;P31942;P31942-4;P31942-6;P31942-5	P31942-3;P31942-2;P31942;P31942-4	Heterogeneous nuclear ribonucleoprotein H3	HNRNPH3	-	-	-	-	0.19719	0.540571	26.804	26.7989	26.7393	26.4696	26.9056	26.3754
P31943	P31943	Heterogeneous nuclear ribonucleoprotein H;Heterogeneous nuclear ribonucleoprotein H, N-terminally processed	HNRNPH1	-	-	-	-	0.191647	0.500175	28.6345	28.5652	28.5416	28.4006	28.48	28.2858
P31946	P31946	14-3-3 protein beta/alpha;14-3-3 protein beta/alpha, N-terminally processed	YWHAB	-	-	-	YES	-0.253787	0.337332	30.6334	30.1577	30.6575	30.5465	30.7275	30.9359
P31947;P31947-2	P31947;P31947-2	14-3-3 protein sigma	SFN	-	-	-	YES	-0.187093	0.457249	28.7283	28.6126	28.7501	28.8151	28.7778	29.0594
P31948;P31948-3;P31948-2	P31948;P31948-3;P31948-2	Stress-induced-phosphoprotein 1	STIP1	-	-	-	-	-0.160507	0.615489	29.6368	29.3684	29.5486	29.8111	29.648	29.5762
P31949	P31949	Protein S100-A11;Protein S100-A11, N-terminally processed	S100A11	YES	Matrisome-associated	Secreted Factors	YES	-1.02038	0.125658	26.7982	25.1557	26.4097	27.1943	27.638	26.5925
P32004-3;P32004-2;P32004	P32004-3;P32004-2;P32004	Neural cell adhesion molecule L1	L1CAM	-	-	-	-	0.982357	0.00997277	28.177	28.0794	28.1783	26.8721	27.2647	27.3509
P32119;P32119-2	P32119	Peroxiredoxin-2	PRDX2	-	-	-	YES	-0.405457	0.231127	28.7554	28.595	28.6796	28.9059	29.3435	28.997
P33176;O60282;Q12840;O60282-2	P33176	Kinesin-1 heavy chain	KIF5B	-	-	-	-	-0.237627	0.457797	25.1654	25.3087	25.6572	25.5729	25.8351	25.4361
P33240-2;P33240	P33240-2;P33240	Cleavage stimulation factor subunit 2	CSTF2	-	-	-	-	-0.185107	0.630897	26.0062	26.1164	25.7852	26.419	26.3005	25.7435
P33316-2;P33316	P33316-2;P33316	Deoxyuridine 5-triphosphate nucleotidohydrolase, mitochondrial	DUT	-	-	-	YES	-0.114037	0.711989	27.0203	27.186	27.5818	26.8399	27.4516	27.8387
P33993;P33993-3;P33993-2	P33993;P33993-3;P33993-2	DNA replication licensing factor MCM7	MCM7	-	-	-	-	1.23903	0.0255716	25.3857	24.1893	24.9506	23.7888	23.2177	23.8021
P34931	P34931	Heat shock 70 kDa protein 1-like	HSPA1L	-	-	-	-	1.69657	0.267533	28.3706	28.3398	28.1416	28.4819	28.2848	22.9956
P34932;P34932-2	P34932	Heat shock 70 kDa protein 4	HSPA4	-	-	-	YES	-0.245827	0.210459	29.1843	29.4574	29.2839	29.6233	29.454	29.5859
P35237	P35237	Serpin B6	SERPINB6	YES	Matrisome-associated	ECM Regulators	YES	-0.181683	0.736654	26.8197	26.8242	26.286	26.9795	26.7376	26.7579
P35241;P35241-5;P35241-4;P35241-2;P35241-3	P35241;P35241-5;P35241-4	Radixin	RDX	-	-	-	YES	-0.382273	0.565377	24.5533	25.4014	24.6632	26.1053	25.3744	24.2849
P35244	P35244	Replication protein A 14 kDa subunit	RPA3	-	-	-	-	-0.01385	0.969011	25.6531	25.548	24.935	25.6409	25.3951	25.1418
P35443	P35443	Thrombospondin-4	THBS4	YES	Core matrisome	ECM Glycoproteins	YES	-0.56096	0.437671	25.8625	23.1534	26.4078	25.3035	25.1641	26.6391
P35579;P35579-2;P35749-4;P35749-3;P35749;P35749-2;REV__Q08AF3;REV__Q9UKV3-5;REV__Q9UKV3	P35579;P35579-2	Myosin-9	MYH9	-	-	-	YES	-0.0216567	0.958925	30.3224	30.3588	30.1236	30.3194	30.3919	30.1585
P35606-2;P35606	P35606-2;P35606	Coatomer subunit beta	COPB2	-	-	-	-	-0.118053	0.614817	26.5822	26.5919	26.6163	26.6982	26.7029	26.7434
P35637-2;P35637	P35637-2;P35637	RNA-binding protein FUS	FUS	-	-	-	-	-0.148453	0.652752	25.5848	24.8815	25.0275	25.1717	25.398	25.3695
P35908	P35908	Keratin, type II cytoskeletal 2 epidermal	KRT2	-	-	-	YES	0.0857933	0.9236	32.0735	31.7611	31.0394	32.1399	33.0812	29.3954
P35998;P35998-2	P35998;P35998-2	26S protease regulatory subunit 7	PSMC2	-	-	-	-	-0.145947	0.720363	26.8329	26.985	26.2739	27.1329	27.0579	26.3389
P36578	P36578	60S ribosomal protein L4	RPL4	-	-	-	YES	-0.527663	0.255979	25.7479	25.3947	25.9691	26.1556	25.9549	26.5842
P37802;P37802-2;Q9UI15	P37802;P37802-2	Transgelin-2	TAGLN2	-	-	-	YES	0.18025	0.595276	29.5659	29.3322	29.1903	29.3136	29.233	29.0011
P37837	P37837	Transaldolase	TALDO1	-	-	-	YES	-0.302827	0.225751	27.7497	27.3063	27.4803	27.9798	27.6331	27.832
P38159;P38159-3;P38159-2;Q96E39;O75526;Q8N7X1	P38159;P38159-3;P38159-2;Q96E39;O75526	RNA-binding motif protein, X chromosome;RNA-binding motif protein, X chromosome, N-terminally processed;RNA binding motif protein, X-linked-like-1;RNA-binding motif protein, X-linked-like-2	RBMX;RBMXL1;RBMXL2	-	-	-	-	-0.0344567	0.944815	24.6029	25.1941	24.746	24.3426	25.5216	24.7822
P38606-2;P38606	P38606-2;P38606	V-type proton ATPase catalytic subunit A	ATP6V1A	-	-	-	YES	0.169237	0.682476	25.7765	25.8594	25.8015	25.7108	25.5131	25.7058
P38646	P38646	Stress-70 protein, mitochondrial	HSPA9	-	-	-	YES	-0.24636	0.39549	28.9001	29.4796	28.8902	29.4829	29.5396	28.9866
P38919	P38919	Eukaryotic initiation factor 4A-III;Eukaryotic initiation factor 4A-III, N-terminally processed	EIF4A3	-	-	-	-	-0.183747	0.784449	26.2087	26.3309	25.6414	26.3236	26.5359	25.8728
P39023;Q92901	P39023	60S ribosomal protein L3	RPL3	-	-	-	YES	0.143513	0.701712	26.7794	27.0019	26.6188	26.4266	26.2774	27.2654
P39687;O43423;O95626	P39687	Acidic leucine-rich nuclear phosphoprotein 32 family member A	ANP32A	-	-	-	-	-0.68194	0.0388784	27.1615	27.374	27.8038	28.3543	27.6925	28.3384
P40121;P40121-2	P40121;P40121-2	Macrophage-capping protein	CAPG	-	-	-	YES	-1.01355	0.0712847	28.5047	28.816	28.4097	29.644	29.6585	29.4685
P40227;P40227-2;Q92526;Q92526-2;Q92526-3	P40227;P40227-2	T-complex protein 1 subunit zeta	CCT6A	-	-	-	YES	-0.294817	0.232977	28.2675	28.1446	28.2671	28.5859	28.5389	28.4388
P40925;P40925-3;P40925-2	P40925;P40925-3;P40925-2	Malate dehydrogenase, cytoplasmic	MDH1	-	-	-	YES	-0.564353	0.095835	27.458	27.3035	26.8698	28.0776	27.9916	27.2552
P40926;P40926-2	P40926;P40926-2	Malate dehydrogenase, mitochondrial	MDH2	-	-	-	YES	-0.330833	0.22926	27.6244	27.4518	27.5201	27.9601	27.8298	27.799
P41250	P41250	Glycine--tRNA ligase	GARS	-	-	-	YES	-0.261613	0.369325	28.0123	28.0316	28.0318	28.6752	28.1727	28.0126
P41567;O60739	P41567;O60739	Eukaryotic translation initiation factor 1;Eukaryotic translation initiation factor 1b	EIF1;EIF1B	-	-	-	-	0.0299467	0.953505	26.6129	26.673	26.4589	26.7796	26.5069	26.3685
P42167-3;P42167-2;P42167;P42166	P42167-3;P42167-2;P42167;P42166	Lamina-associated polypeptide 2, isoforms beta/gamma;Thymopoietin;Thymopentin;Lamina-associated polypeptide 2, isoform alpha;Thymopoietin;Thymopentin	TMPO	-	-	-	-	-0.71121	0.169895	25.5853	24.938	25.3995	25.8822	26.0928	26.0814
P42785;P42785-2	P42785;P42785-2	Lysosomal Pro-X carboxypeptidase	PRCP	-	-	-	YES	0.243093	0.603758	28.8526	29.3619	29.6351	29.6354	29.0515	28.4334
P43034;P43034-2	P43034	Platelet-activating factor acetylhydrolase IB subunit alpha	PAFAH1B1	-	-	-	YES	-0.363847	0.132878	26.1274	25.638	26.1697	26.6089	26.2444	26.1733
P43243;P43243-2	P43243;P43243-2	Matrin-3	MATR3	-	-	-	-	0.02211	0.971434	26.0045	26.5773	25.5818	25.9153	26.032	26.15
P43487-2;P43487	P43487-2;P43487	Ran-specific GTPase-activating protein	RANBP1	-	-	-	-	1.4029	0.174427	27.7835	27.5438	27.644	23.7306	27.1593	27.8727
P43490	P43490	Nicotinamide phosphoribosyltransferase	NAMPT	-	-	-	YES	-0.29594	0.30028	27.1715	27.5168	27.003	27.6134	27.3871	27.5786
P43686-2;P43686	P43686-2;P43686	26S protease regulatory subunit 6B	PSMC4	-	-	-	-	-0.0502567	0.849961	26.3759	26.5649	26.3181	26.7176	26.4004	26.2916
P45973	P45973	Chromobox protein homolog 5	CBX5	-	-	-	-	0.485953	0.105462	24.8549	24.4233	24.9762	24.0059	23.9761	24.8146
P45974-2;P45974;Q92995-2;Q92995	P45974-2;P45974	Ubiquitin carboxyl-terminal hydrolase 5	USP5	-	-	-	-	0.46227	0.0813038	27.8449	27.8739	27.5038	27.3164	27.3489	27.1704
P46108;P46108-2	P46108;P46108-2	Adapter molecule crk	CRK	-	-	-	YES	0.01728	0.961515	26.6164	27.2018	26.1382	26.9476	26.8832	26.0738
P46109	P46109	Crk-like protein	CRKL	-	-	-	-	-0.01593	0.975688	25.8962	26.0157	25.6189	26.1186	25.7368	25.7233
P46777	P46777	60S ribosomal protein L5	RPL5	-	-	-	YES	-0.19079	0.457294	26.824	26.3477	26.3837	26.6084	26.6862	26.8332
P46778	P46778	60S ribosomal protein L21	RPL21	-	-	-	-	0.0152733	0.954762	24.8909	25.1708	24.9962	24.6944	24.919	25.3987
P46782	P46782	40S ribosomal protein S5;40S ribosomal protein S5, N-terminally processed	RPS5	-	-	-	YES	-0.448897	0.166064	26.2179	26.0881	25.58	26.489	26.6007	26.1429
P46940	P46940	Ras GTPase-activating-like protein IQGAP1	IQGAP1	-	-	-	YES	0.737627	0.019602	28.6309	28.5928	28.0753	27.9606	27.7358	27.3898
P47224	P47224	Guanine nucleotide exchange factor MSS4	RABIF	-	-	-	-	0.39137	0.263479	24.4363	24.9032	24.5048	24.5153	24.0392	24.1158
P47756-2;P47756	P47756-2;P47756	F-actin-capping protein subunit beta	CAPZB	-	-	-	YES	-0.265117	0.219122	27.7425	27.9636	27.6664	27.9665	28.2325	27.9688
P48147	P48147	Prolyl endopeptidase	PREP	-	-	-	-	0.04185	0.945271	25.7298	26.2382	25.1753	25.7844	26.0002	25.2332
P48444;P48444-2	P48444;P48444-2	Coatomer subunit delta	ARCN1	-	-	-	-	-0.16788	0.607492	25.7245	25.8212	25.5077	26.152	25.9361	25.4689
P48637;P48637-2	P48637;P48637-2	Glutathione synthetase	GSS	-	-	-	YES	-0.173613	0.512984	28.3337	28.1585	27.7542	28.4918	28.2633	28.0121
P48643;P48643-2	P48643;P48643-2	T-complex protein 1 subunit epsilon	CCT5	-	-	-	YES	-0.0130567	0.958584	29.3508	29.0042	29.0805	29.3539	29.2917	28.829
P49006	P49006	MARCKS-related protein	MARCKSL1	-	-	-	YES	0.0282767	0.942892	24.7709	24.6898	23.5932	24.5741	24.936	23.4588
P49189;P49189-2	P49189	4-trimethylaminobutyraldehyde dehydrogenase	ALDH9A1	-	-	-	YES	0.279927	0.487154	26.4415	26.5213	26.1865	26.7892	26.6223	24.8981
P49321;P49321-3;P49321-4;P49321-2	P49321;P49321-3;P49321-4;P49321-2	Nuclear autoantigenic sperm protein	NASP	-	-	-	-	-0.43	0.150422	28.1607	27.6727	28.1165	28.4408	28.2063	28.5929
P49327	P49327	Fatty acid synthase;[Acyl-carrier-protein] S-acetyltransferase;[Acyl-carrier-protein] S-malonyltransferase;3-oxoacyl-[acyl-carrier-protein] synthase;3-oxoacyl-[acyl-carrier-protein] reductase;3-hydroxyacyl-[acyl-carrier-protein] dehydratase;Enoyl-[acyl-carrier-protein] reductase;Oleoyl-[acyl-carrier-protein] hydrolase	FASN	-	-	-	YES	-0.07534	0.897217	28.2548	27.7236	27.5174	28.2811	28.0633	27.3774
P49368;P49368-2	P49368;P49368-2	T-complex protein 1 subunit gamma	CCT3	-	-	-	YES	-0.298273	0.29996	28.2165	28.3106	28.0908	28.7228	28.4055	28.3844
P49588;P49588-2	P49588;P49588-2	Alanine--tRNA ligase, cytoplasmic	AARS	-	-	-	YES	0.0840867	0.804698	27.015	26.9074	26.7725	26.9956	26.826	26.621
P49720	P49720	Proteasome subunit beta type-3	PSMB3	-	-	-	YES	-0.88253	0.0276573	25.6129	23.8669	25.1298	25.9017	25.8315	25.5241
P49721	P49721	Proteasome subunit beta type-2	PSMB2	-	-	-	YES	-0.0457667	0.908018	27.148	27.2927	26.8294	27.5659	27.3027	26.5388
P49736	P49736	DNA replication licensing factor MCM2	MCM2	-	-	-	-	0.00501667	0.99037	24.4019	24.1416	25.0116	24.4808	24.4675	24.5919
P49915-2;P49915	P49915-2;P49915	GMP synthase [glutamine-hydrolyzing]	GMPS	-	-	-	-	-0.527297	0.317311	24.5367	23.8757	24.1673	25.1618	24.7288	24.2709
P50395;P50395-2	P50395;P50395-2	Rab GDP dissociation inhibitor beta	GDI2	-	-	-	YES	-0.20865	0.448865	29.7396	29.4767	29.5635	29.983	29.7763	29.6464
P50454	P50454	Serpin H1	SERPINH1	YES	Matrisome-associated	ECM Regulators	-	-0.0407467	0.889844	27.6339	27.6453	27.8993	27.9902	27.7257	27.5848
P50502;Q8NFI4;Q8IZP2	P50502;Q8NFI4;Q8IZP2	Hsc70-interacting protein;Putative protein FAM10A5;Putative protein FAM10A4	ST13;ST13P5;ST13P4	-	-	-	-	-0.285707	0.316902	25.8691	25.472	26.0452	26.2258	25.7622	26.2555
P50579-3;P50579-2;P50579	P50579-3;P50579-2;P50579	Methionine aminopeptidase 2	METAP2	-	-	-	-	-1.01689	0.0294906	25.2667	25.2946	26.1294	25.8711	26.7747	27.0957
P50990;P50990-2;P50990-3	P50990;P50990-2;P50990-3	T-complex protein 1 subunit theta	CCT8	-	-	-	YES	-0.40155	0.181855	29.1614	28.7733	28.7847	29.5375	29.4657	28.9209
P50991;P50991-2	P50991;P50991-2	T-complex protein 1 subunit delta	CCT4	-	-	-	YES	0.07828	0.856325	28.0716	28.0525	27.6616	27.9826	27.956	27.6122
P51114-3;P51114-2;P51114;P51116	P51114-3;P51114-2;P51114	Fragile X mental retardation syndrome-related protein 1	FXR1	-	-	-	-	0.58305	0.264403	25.6912	25.5438	25.6997	24.0738	25.4341	25.6776
P51858;P51858-2;P51858-3;Q9Y3E1;O75475-3;O75475-2;O75475;Q7Z4V5-4;Q7Z4V5-3	P51858;P51858-2;P51858-3	Hepatoma-derived growth factor	HDGF	-	-	-	-	-0.464173	0.0683792	28.0545	27.6218	27.9143	28.2988	28.0882	28.5962
P51991-2;P51991	P51991-2;P51991	Heterogeneous nuclear ribonucleoprotein A3	HNRNPA3	-	-	-	-	-0.577083	0.067369	26.2792	26.2823	26.2941	26.9066	26.9498	26.7305
P52209-2;P52209	P52209-2;P52209	6-phosphogluconate dehydrogenase, decarboxylating	PGD	-	-	-	YES	0.22483	0.678862	26.6016	24.949	26.0398	26.2435	25.2762	25.3963
P52272-2;P52272	P52272-2;P52272	Heterogeneous nuclear ribonucleoprotein M	HNRNPM	-	-	-	YES	0.17524	0.716124	28.2297	27.865	27.3437	27.7345	27.9363	27.2418
P52565;P52565-2	P52565;P52565-2	Rho GDP-dissociation inhibitor 1	ARHGDIA	-	-	-	YES	0.66005	0.199876	27.9498	28.0379	28.6439	26.0517	28.0446	28.5552
P52597	P52597	Heterogeneous nuclear ribonucleoprotein F;Heterogeneous nuclear ribonucleoprotein F, N-terminally processed	HNRNPF	-	-	-	-	-0.183987	0.456515	27.0697	26.856	27.4721	27.4309	27.1507	27.3682
P52788;P52788-2	P52788;P52788-2	Spermine synthase	SMS	-	-	-	YES	0.14322	0.469296	26.391	26.6962	26.4051	26.2663	26.3345	26.4618
P52823;P52823-2	P52823;P52823-2	Stanniocalcin-1	STC1	-	-	-	-	0.599033	0.313449	28.6955	28.8136	30.1465	27.6684	28.8404	29.3498
P52888;P52888-2	P52888;P52888-2	Thimet oligopeptidase	THOP1	-	-	-	-	0.832023	0.0099817	26.966	26.3797	26.3312	26.1535	25.4791	25.5482
P52907	P52907	F-actin-capping protein subunit alpha-1	CAPZA1	-	-	-	YES	-0.0155333	0.9481	28.2134	28.0925	28.0381	28.3481	28.018	28.0245
P53041	P53041	Serine/threonine-protein phosphatase 5	PPP5C	-	-	-	-	-0.572327	0.259145	24.433	24.7417	24.9346	24.6724	25.8155	25.3385
P53396-2;P53396;P53396-3	P53396-2;P53396;P53396-3	ATP-citrate synthase	ACLY	-	-	-	YES	0.0445833	0.949737	27.3449	27.927	27.024	27.5592	27.4758	27.1271
P53621;P53621-2	P53621;P53621-2	Coatomer subunit alpha;Xenin;Proxenin	COPA	-	-	-	YES	0.0492167	0.879367	25.4475	25.4172	25.2971	25.6258	25.7738	24.6146
P53999	P53999	Activated RNA polymerase II transcriptional coactivator p15	SUB1	-	-	-	YES	-0.934733	0.253597	27.2561	23.4747	26.8466	26.7997	26.8277	26.7542
P54136;P54136-2	P54136;P54136-2	Arginine--tRNA ligase, cytoplasmic	RARS	-	-	-	YES	-0.292127	0.311206	25.8503	25.8061	25.6091	26.378	26.034	25.7298
P54578-2;P54578-3;P54578	P54578-2;P54578-3;P54578	Ubiquitin carboxyl-terminal hydrolase 14	USP14	-	-	-	YES	-0.937117	0.00118247	26.2129	26.1839	26.0758	27.1511	26.9307	27.2022
P54727;P54727-2	P54727;P54727-2	UV excision repair protein RAD23 homolog B	RAD23B	-	-	-	-	0.489433	0.629104	28.245	27.9494	27.3788	27.7366	27.329	27.0394
P54819-5;P54819-2;P54819;P54819-3;P54819-6;P54819-4	P54819-5;P54819-2;P54819;P54819-3;P54819-6	Adenylate kinase 2, mitochondrial;Adenylate kinase 2, mitochondrial, N-terminally processed	AK2	-	-	-	YES	-0.23968	0.403464	25.6595	26.1307	25.8213	26.511	25.956	25.8635
P55036;P55036-2	P55036	26S proteasome non-ATPase regulatory subunit 4	PSMD4	-	-	-	-	-0.303283	0.494233	26.8424	26.2761	26.6852	26.6835	27.0443	26.9859
P55060-3;P55060;P55060-4;P55060-2	P55060-3;P55060;P55060-4;P55060-2	Exportin-2	CSE1L	-	-	-	YES	-0.0216967	0.939445	27.8535	27.5534	27.4321	28.0082	27.5696	27.3263
P55072	P55072	Transitional endoplasmic reticulum ATPase	VCP	-	-	-	YES	-0.12338	0.614743	30.3577	30.1657	30.3609	30.5257	30.4093	30.3194
P55209-2;P55209;P55209-3	P55209-2;P55209;P55209-3	Nucleosome assembly protein 1-like 1	NAP1L1	-	-	-	-	-0.52998	0.11421	29.8074	29.5779	29.8252	30.3178	30.1797	30.3029
P55268	P55268	Laminin subunit beta-2	LAMB2	YES	Core matrisome	ECM Glycoproteins	YES	0.247133	0.51776	29.151	29.6219	29.4246	29.1055	29.1432	29.2074
P55786;P55786-2;A6NEC2;A6NEC2-3;A6NEC2-2	P55786;P55786-2	Puromycin-sensitive aminopeptidase	NPEPPS	-	-	-	YES	-0.3808	0.0801668	26.5677	26.5729	26.3253	26.8411	26.9579	26.8092
P55795	P55795	Heterogeneous nuclear ribonucleoprotein H2	HNRNPH2	-	-	-	-	0.14799	0.834195	23.8093	26.1751	25.1147	24.1988	25.4721	24.9842
P55884;P55884-2	P55884;P55884-2	Eukaryotic translation initiation factor 3 subunit B	EIF3B	-	-	-	YES	-0.312933	0.281216	28.1401	27.8761	28.2414	28.5159	28.4884	28.1921
P56537;P56537-2	P56537;P56537-2	Eukaryotic translation initiation factor 6	EIF6	-	-	-	YES	0.146277	0.616966	30.0767	29.7808	29.7663	29.6378	29.7052	29.842
P59998;P59998-2;P59998-3;P59998-4	P59998;P59998-2;P59998-3	Actin-related protein 2/3 complex subunit 4	ARPC4	-	-	-	YES	-0.43267	0.493381	25.4335	25.3735	25.2061	26.5082	25.6185	25.1843
P60174-1;P60174;P60174-4	P60174-1;P60174;P60174-4	Triosephosphate isomerase	TPI1	-	-	-	YES	0.419143	0.0782533	30.6207	30.4948	30.4603	30.1121	30.1058	30.1005
P60660-2;P60660;P14649	P60660-2;P60660	Myosin light polypeptide 6	MYL6	-	-	-	YES	0.301103	0.151457	29.9874	30.1855	29.904	29.7288	29.743	29.7018
P60842;P60842-2	P60842;P60842-2	Eukaryotic initiation factor 4A-I	EIF4A1	-	-	-	YES	-0.0901267	0.805159	30.8098	30.4883	30.7229	31.1699	30.793	30.3285
P60866;P60866-2	P60866;P60866-2	40S ribosomal protein S20	RPS20	-	-	-	YES	-0.751243	0.127352	23.2689	24.1411	23.9765	23.9695	25.0379	24.6328
P60900;P60900-2;P60900-3	P60900;P60900-2	Proteasome subunit alpha type-6	PSMA6	-	-	-	YES	0.0552467	0.80637	28.7919	28.3714	28.358	28.5116	28.4573	28.3866
P61086-2;P61086;P61086-3	P61086-2;P61086	Ubiquitin-conjugating enzyme E2 K	UBE2K	-	-	-	-	-0.310667	0.555762	25.7779	25.7398	25.3897	26.1226	26.0149	25.7019
P61088;Q5JXB2	P61088;Q5JXB2	Ubiquitin-conjugating enzyme E2 N;Putative ubiquitin-conjugating enzyme E2 N-like	UBE2N;UBE2NL	-	-	-	-	-0.91553	0.0381637	26.4668	26.2889	26.3701	27.4935	27.5526	26.8263
P61158;Q9P1U1-2;Q9P1U1;Q9P1U1-3;Q9C0K3	P61158	Actin-related protein 3	ACTR3	-	-	-	YES	-0.503233	0.0371831	28.2233	28.1335	27.9608	28.7794	28.5523	28.4956
P61160;P61160-2	P61160;P61160-2	Actin-related protein 2	ACTR2	-	-	-	YES	-0.579177	0.0949473	26.4448	26.5215	26.5567	26.9618	27.1997	27.0991
P61247	P61247	40S ribosomal protein S3a	RPS3A	-	-	-	YES	-0.23063	0.422513	26.9895	26.4266	26.2578	27.0074	26.8235	26.5348
P61254;Q9UNX3	P61254;Q9UNX3	60S ribosomal protein L26;60S ribosomal protein L26-like 1	RPL26;RPL26L1	-	-	-	-	-0.479297	0.418785	23.5581	24.237	24.851	24.0972	24.6228	25.364
P61289;P61289-3;P61289-2	P61289;P61289-3;P61289-2	Proteasome activator complex subunit 3	PSME3	-	-	-	-	-0.02854	0.910815	26.9441	27.2498	26.8196	27.2323	26.8745	26.9923
P61313;P61313-2	P61313;P61313-2	60S ribosomal protein L15	RPL15	-	-	-	-	-0.275147	0.623259	26.3985	26.3904	25.8115	26.8673	26.0426	26.5159
P61457	P61457	Pterin-4-alpha-carbinolamine dehydratase	PCBD1	-	-	-	YES	0.945533	0.00808546	26.493	26.7345	26.4282	26.0821	25.7741	24.963
P61769	P61769	Beta-2-microglobulin;Beta-2-microglobulin form pI 5.3	B2M	-	-	-	YES	-0.46679	0.35503	28.7943	28.2494	30.0637	28.7184	30.004	29.7853
P61970	P61970	Nuclear transport factor 2	NUTF2	-	-	-	YES	0.0495133	0.860074	27.6409	27.6492	27.1214	27.6816	27.3857	27.1957
P61978-2;P61978	P61978-2;P61978	Heterogeneous nuclear ribonucleoprotein K	HNRNPK	-	-	-	YES	-0.201387	0.396371	30.0812	30.1348	29.9043	30.2539	30.206	30.2645
P61981	P61981	14-3-3 protein gamma;14-3-3 protein gamma, N-terminally processed	YWHAG	-	-	-	YES	-0.26355	0.246129	29.2087	28.8708	29.1117	29.2216	29.2077	29.5526
P62081	P62081	40S ribosomal protein S7	RPS7	-	-	-	-	0.01662	0.970037	25.6297	25.022	25.4754	25.4219	25.0518	25.6034
P62136;P62136-2;P62136-3	P62136;P62136-2;P62136-3	Serine/threonine-protein phosphatase PP1-alpha catalytic subunit	PPP1CA	-	-	-	YES	-0.122323	0.839827	26.3385	26.5253	26.5111	26.9053	26.7718	26.0648
P62191;P62191-2	P62191;P62191-2	26S protease regulatory subunit 4	PSMC1	-	-	-	-	-0.16089	0.515194	25.7268	25.5762	25.6586	25.6235	26.0477	25.773
P62195;P62195-2	P62195;P62195-2	26S protease regulatory subunit 8	PSMC5	-	-	-	YES	-0.130893	0.707064	26.0056	26.063	25.7712	26.3113	26.1186	25.8025
P62241	P62241	40S ribosomal protein S8	RPS8	-	-	-	YES	-0.36992	0.234694	26.9765	26.9309	27.0885	27.1756	27.2296	27.7005
P62258;P62258-2	P62258;P62258-2	14-3-3 protein epsilon	YWHAE	-	-	-	YES	0.104663	0.656599	31.7769	31.7182	31.5916	31.4175	31.5704	31.7847
P62280	P62280	40S ribosomal protein S11	RPS11	-	-	-	YES	-0.345563	0.141935	25.3941	25.537	25.3863	25.8535	25.5582	25.9425
P62310	P62310	U6 snRNA-associated Sm-like protein LSm3	LSM3	-	-	-	-	-0.0386233	0.862838	27.7251	27.6977	27.0697	27.7724	27.4138	27.4222
P62314	P62314	Small nuclear ribonucleoprotein Sm D1	SNRPD1	-	-	-	-	-0.291353	0.712599	25.0443	25.4417	24.5062	24.9456	26.307	24.6137
P62318-2;P62318	P62318-2;P62318	Small nuclear ribonucleoprotein Sm D3	SNRPD3	-	-	-	-	-0.308523	0.707936	27.3263	27.5083	27.0476	27.7148	27.5977	27.4953
P62333	P62333	26S protease regulatory subunit 10B	PSMC6	-	-	-	YES	0.0231933	0.970523	26.9911	27.222	26.4879	27.0654	26.9575	26.6085
P62491-2;Q15907-2;P62491;Q15907;P57735	P62491-2;Q15907-2;P62491;Q15907	Ras-related protein Rab-11A;Ras-related protein Rab-11B	RAB11A;RAB11B	-	-	-	-	0.426883	0.447985	25.4519	25.1978	25.0048	23.3967	25.4931	25.484
P62495;P62495-2	P62495;P62495-2	Eukaryotic peptide chain release factor subunit 1	ETF1	-	-	-	-	-0.35973	0.197649	25.4176	25.314	25.0486	25.8451	25.5368	25.4774
P62750	P62750	60S ribosomal protein L23a	RPL23A	-	-	-	YES	-0.29278	0.507345	25.7411	25.6246	25.3739	25.7129	26.0789	25.8261
P62753	P62753	40S ribosomal protein S6	RPS6	-	-	-	-	-0.253727	0.34951	25.9524	25.8571	26.0019	26.3132	26.0571	26.2022
P62826	P62826	GTP-binding nuclear protein Ran	RAN	-	-	-	YES	1.28226	0.0238104	27.0039	25.9435	26.0266	23.9346	26.2192	24.9734
P62851	P62851	40S ribosomal protein S25	RPS25	-	-	-	YES	-0.764587	0.149289	24.5342	24.4345	23.7732	25.1532	24.9353	24.9472
P62906	P62906	60S ribosomal protein L10a	RPL10A	-	-	-	YES	-0.20805	0.585001	27.5978	28.015	27.2184	28.1412	28.0636	27.2505
P62937;P62937-2;P0DN26;A0A0B4J2A2;A0A075B759;Q9Y536;F5H284;P0DN37;O43447-2	P62937;P62937-2	Peptidyl-prolyl cis-trans isomerase A;Peptidyl-prolyl cis-trans isomerase A, N-terminally processed	PPIA	-	-	-	YES	-0.556007	0.153681	30.3023	30.3452	30.1278	30.8474	31.2908	30.3051
P62993;P62993-2	P62993;P62993-2	Growth factor receptor-bound protein 2	GRB2	-	-	-	YES	0.337907	0.320377	27.2808	27.0661	26.5572	26.6693	26.9024	26.3187
P63104;P63104-2	P63104;P63104-2	14-3-3 protein zeta/delta	YWHAZ	-	-	-	YES	-0.28755	0.266512	32.8578	32.639	32.8458	32.9719	33.0257	33.2075
P63208;P63208-2	P63208;P63208-2	S-phase kinase-associated protein 1	SKP1	-	-	-	-	-0.103167	0.892514	27.4168	27.4835	27.5067	27.626	27.3444	27.746
P63220	P63220	40S ribosomal protein S21	RPS21	-	-	-	-	-0.157503	0.674396	27.191	27.2172	26.6326	27.1151	27.6013	26.797
P63241;P63241-2;Q6IS14;Q9GZV4	P63241;P63241-2;Q6IS14	Eukaryotic translation initiation factor 5A-1;Eukaryotic translation initiation factor 5A-1-like	EIF5A;EIF5AL1	-	-	-	-	-0.298767	0.534038	28.4262	27.9136	28.1377	28.6536	28.745	27.9751
P63244	P63244	Guanine nucleotide-binding protein subunit beta-2-like 1;Guanine nucleotide-binding protein subunit beta-2-like 1, N-terminally processed	GNB2L1	-	-	-	-	-0.266647	0.461857	27.788	28.102	27.4025	28.222	28.373	27.4975
P63261	P63261	Actin, cytoplasmic 2;Actin, cytoplasmic 2, N-terminally processed	ACTG1	-	-	-	YES	0.0508133	0.793831	34.5934	34.366	34.5178	34.2409	34.3499	34.7339
P67775;P62714;P67775-2	P67775;P62714;P67775-2	Serine/threonine-protein phosphatase 2A catalytic subunit alpha isoform;Serine/threonine-protein phosphatase 2A catalytic subunit beta isoform	PPP2CA;PPP2CB	-	-	-	-	0.209623	0.669343	25.1208	25.5599	25.5109	23.8226	26.0831	25.657
P67809;Q9Y2T7	P67809	Nuclease-sensitive element-binding protein 1	YBX1	-	-	-	YES	-0.213383	0.442048	27.8401	27.7851	28.1469	27.6659	28.3269	28.4196
P67936	P67936	Tropomyosin alpha-4 chain	TPM4	-	-	-	YES	-0.610963	0.0384091	29.1074	28.7705	29.2821	29.3535	29.6798	29.9595
P68133;P68032;P63267;P62736	P68133;P68032;P63267;P62736	Actin, alpha skeletal muscle;Actin, alpha cardiac muscle 1;Actin, gamma-enteric smooth muscle;Actin, aortic smooth muscle	ACTA1;ACTC1;ACTG2;ACTA2	-	-	-	-	-0.130007	0.917299	28.1029	27.8527	28.5014	27.9201	28.2463	28.6806
Q5VTE0;P68104;P68104-2	Q5VTE0;P68104;P68104-2	Putative elongation factor 1-alpha-like 3;Elongation factor 1-alpha 1	EEF1A1P5;EEF1A1	-	-	-	-	-0.59094	0.0535792	30.9182	30.4523	30.6931	31.6926	31.202	30.9418
P68363;P68363-2;A6NHL2-2;A6NHL2;Q9H853	P68363;P68363-2	Tubulin alpha-1B chain	TUBA1B	-	-	-	-	0.430103	0.136196	32.5737	32.5768	32.1784	32.1943	31.9702	31.8741
P68371;P04350	P68371;P04350	Tubulin beta-4B chain;Tubulin beta-4A chain	TUBB4B;TUBB4A	-	-	-	-	0.443997	0.09949	31.9963	31.9304	31.6489	31.6066	31.3672	31.2697
Q8NEV1;P68400;P68400-2	Q8NEV1;P68400;P68400-2	Casein kinase II subunit alpha 3;Casein kinase II subunit alpha	CSNK2A3;CSNK2A1	-	-	-	-	-0.479263	0.216883	24.9917	24.8012	25.095	25.5746	25.753	24.9982
Q71DI3;P84243;P68431;Q6NXT2;Q16695	Q71DI3;P84243;P68431;Q6NXT2;Q16695	Histone H3.2;Histone H3.3;Histone H3.1;Histone H3.3C;Histone H3.1t	HIST2H3A;H3F3A;HIST1H3A;H3F3C;HIST3H3	-	-	-	-	-0.827387	0.380578	25.142	23.7011	26.0025	24.3385	25.6192	27.3701
P78371;P78371-2	P78371;P78371-2	T-complex protein 1 subunit beta	CCT2	-	-	-	YES	-0.109973	0.693597	29.1897	29.1419	28.9254	29.4257	29.1217	29.0395
P78406	P78406	mRNA export factor	RAE1	-	-	-	-	-0.13526	0.808992	24.8123	24.3615	24.9722	24.5465	24.9885	25.0168
P78417;P78417-2;P78417-3	P78417;P78417-2;P78417-3	Glutathione S-transferase omega-1	GSTO1	-	-	-	YES	-0.45882	0.367197	26.7491	26.001	26.104	26.8158	27.1716	26.2431
P78536-2;P78536	P78536-2;P78536	Disintegrin and metalloproteinase domain-containing protein 17	ADAM17	YES	Matrisome-associated	ECM Regulators	-	0.0911667	0.851901	26.3394	26.0202	26.6702	25.991	25.9973	26.768
P80303-2;P80303	P80303-2;P80303	Nucleobindin-2;Nesfatin-1	NUCB2	-	-	-	YES	-0.03	0.900747	27.023	27.3699	27.3137	27.2695	27.0654	27.4618
P80723;P80723-2	P80723;P80723-2	Brain acid soluble protein 1	BASP1	-	-	-	YES	-0.0771	0.836936	26.2896	26.1546	26.6565	25.586	26.6125	27.1335
P81605;P81605-2	P81605;P81605-2	Dermcidin;Survival-promoting peptide;DCD-1	DCD	-	-	-	YES	-0.322343	0.783044	28.1689	24.9182	29.1964	25.2862	27.9398	30.0246
P82979	P82979	SAP domain-containing ribonucleoprotein	SARNP	-	-	-	-	0.103797	0.777619	26.3807	25.8733	26.1176	26.3047	25.8651	25.8906
P84090	P84090	Enhancer of rudimentary homolog	ERH	-	-	-	-	-0.193217	0.614937	26.8168	26.3747	26.7099	26.5905	26.9905	26.9
P84098	P84098	60S ribosomal protein L19	RPL19	-	-	-	-	-0.348627	0.500327	25.6081	25.2267	25.0333	25.5387	25.4926	25.8827
P84103-2;P84103	P84103-2;P84103	Serine/arginine-rich splicing factor 3	SRSF3	-	-	-	-	0.210397	0.736532	28.335	28.4615	26.4924	27.8915	27.8736	26.8926
P98160	P98160	Basement membrane-specific heparan sulfate proteoglycan core protein;Endorepellin;LG3 peptide	HSPG2	YES	Core matrisome	Proteoglycans	YES	-0.20152	0.510501	29.4926	30.2905	30.0207	30.2848	30.3237	29.7999
P98179	P98179	RNA-binding protein 3	RBM3	-	-	-	-	0.44017	0.184613	26.0651	25.6303	26.3199	25.6332	25.8333	25.2283
Q00610-2;Q00610;P53675-2;P53675	Q00610-2;Q00610	Clathrin heavy chain 1	CLTC	-	-	-	YES	-0.134093	0.681492	29.9341	29.7018	29.4602	30.2231	29.8797	29.3956
Q00688	Q00688	Peptidyl-prolyl cis-trans isomerase FKBP3	FKBP3	-	-	-	-	-0.293157	0.655506	26.1175	25.9135	25.8547	26.6501	26.226	25.8891
Q00839-2;Q00839	Q00839-2;Q00839	Heterogeneous nuclear ribonucleoprotein U	HNRNPU	-	-	-	-	-0.112293	0.721998	27.0445	27.0485	26.6384	26.9001	27.2135	26.9547
Q01082;Q01082-3;Q01082-2;P11277-3;P11277;P11277-2;O15020-2;O15020	Q01082;Q01082-3;Q01082-2	Spectrin beta chain, non-erythrocytic 1	SPTBN1	-	-	-	YES	-0.645597	0.021233	29.3199	29.1036	29.1539	29.9622	29.8666	29.6853
Q01105-2;Q01105-3;Q01105-4;P0DME0	Q01105-2;Q01105-3;Q01105-4;P0DME0	Protein SET;Protein SETSIP	SET;SETSIP	-	-	-	-	0.164273	0.532319	29.4271	29.1051	29.5253	29.1214	28.9678	29.4755
Q01130-2;Q01130;Q9BRL6-2;Q9BRL6	Q01130-2;Q01130	Serine/arginine-rich splicing factor 2	SRSF2	-	-	-	-	0.01963	0.985135	28.6835	28.5941	28.408	28.5914	28.5761	28.4592
Q01518;Q01518-2	Q01518;Q01518-2	Adenylyl cyclase-associated protein 1	CAP1	-	-	-	YES	-0.83488	0.0208514	28.1848	28.0906	28.4081	28.9262	29.1831	29.0788
Q02790	Q02790	Peptidyl-prolyl cis-trans isomerase FKBP4;Peptidyl-prolyl cis-trans isomerase FKBP4, N-terminally processed	FKBP4	-	-	-	YES	0.374387	0.0941314	28.2956	28.5906	28.3509	28.0121	28.096	28.0058
Q02809;Q02809-2	Q02809;Q02809-2	Procollagen-lysine,2-oxoglutarate 5-dioxygenase 1	PLOD1	YES	Matrisome-associated	ECM Regulators	YES	1.65114	0.0170667	27.2418	27.6968	26.8918	26.5463	26.2406	24.0901
Q02818	Q02818	Nucleobindin-1	NUCB1	-	-	-	YES	0.781693	0.00635125	30.7406	30.9452	31.1563	29.9664	30.0596	30.4711
Q02878	Q02878	60S ribosomal protein L6	RPL6	-	-	-	-	-0.06102	0.900787	25.9956	25.8238	25.4211	25.5894	25.8735	25.9607
Q03252	Q03252	Lamin-B2	LMNB2	-	-	-	-	0.301497	0.353842	27.2837	26.9874	26.9876	26.5912	26.9651	26.7979
Q04323;Q04323-2	Q04323;Q04323-2	UBX domain-containing protein 1	UBXN1	-	-	-	-	0.147033	0.702385	26.0471	25.8687	25.7662	25.9208	26.0769	25.2432
Q04446	Q04446	1,4-alpha-glucan-branching enzyme	GBE1	-	-	-	YES	-0.235533	0.537711	27.5469	27.4386	27.6755	27.7199	28.3762	27.2715
Q04760-2;Q04760	Q04760-2;Q04760	Lactoylglutathione lyase	GLO1	-	-	-	YES	-0.510163	0.0346019	28.7203	28.3333	28.5934	29.1183	29.04	29.0191
Q04837	Q04837	Single-stranded DNA-binding protein, mitochondrial	SSBP1	-	-	-	YES	-0.316233	0.684661	25.2286	25.8291	23.4941	26	25.4147	24.0858
Q04917	Q04917	14-3-3 protein eta	YWHAH	-	-	-	YES	0.00262	0.991476	28.1305	27.925	28.0528	27.9354	28.042	28.1231
Q05048	Q05048	Cleavage stimulation factor subunit 1	CSTF1	-	-	-	-	-0.258683	0.472931	24.7989	25.1488	23.5527	24.4978	25.1439	24.6348
Q06124-2;Q06124;Q06124-3	Q06124-2;Q06124;Q06124-3	Tyrosine-protein phosphatase non-receptor type 11	PTPN11	-	-	-	-	-0.336843	0.162196	26.4448	26.4716	26.4757	26.8209	26.6942	26.8875
Q06210-2;Q06210;O94808	Q06210-2;Q06210	Glutamine--fructose-6-phosphate aminotransferase [isomerizing] 1	GFPT1	-	-	-	YES	-0.32576	0.598173	24.5889	23.7551	24.4169	24.8091	24.3953	24.5339
Q06323;Q06323-3;Q06323-2	Q06323;Q06323-3;Q06323-2	Proteasome activator complex subunit 1	PSME1	-	-	-	YES	-0.19487	0.642698	27.8392	27.7491	27.4385	28.1115	27.734	27.7659
Q06481;Q06481-2;Q06481-3;Q06481-6;Q06481-4;Q06481-5	Q06481;Q06481-2;Q06481-3;Q06481-6;Q06481-4;Q06481-5	Amyloid-like protein 2	APLP2	-	-	-	YES	0.23305	0.511783	30.6549	30.666	31.4111	30.4688	30.5613	31.0028
Q06830	Q06830	Peroxiredoxin-1	PRDX1	-	-	-	YES	-0.583963	0.0325113	31.1763	30.9155	30.7982	31.6771	31.5993	31.3656
Q07021	Q07021	Complement component 1 Q subcomponent-binding protein, mitochondrial	C1QBP	-	-	-	-	-0.191303	0.751243	26.9974	26.702	26.5945	27.2477	26.9111	26.709
Q07666-3;Q07666-2;Q07666;O75525-2;O75525;Q5VWX1	Q07666-3;Q07666-2;Q07666	KH domain-containing, RNA-binding, signal transduction-associated protein 1	KHDRBS1	-	-	-	-	-0.351367	0.33352	26.3731	26.2048	25.6728	26.6465	26.6345	26.0239
Q07954	Q07954	Prolow-density lipoprotein receptor-related protein 1;Low-density lipoprotein receptor-related protein 1 85 kDa subunit;Low-density lipoprotein receptor-related protein 1 515 kDa subunit;Low-density lipoprotein receptor-related protein 1 intracellular domain	LRP1	-	-	-	-	0.996333	0.0233525	25.6856	25.8531	26.2107	24.9382	24.1359	25.6863
Q07955;Q07955-3;Q07955-2	Q07955;Q07955-3;Q07955-2	Serine/arginine-rich splicing factor 1	SRSF1	-	-	-	-	-0.0436833	0.927136	28.7279	28.7614	28.6454	28.4757	29.0118	28.7782
Q08380	Q08380	Galectin-3-binding protein	LGALS3BP	-	-	-	YES	0.583717	0.0202786	34.1229	34.6904	34.448	33.8097	33.9615	33.739
Q08945	Q08945	FACT complex subunit SSRP1	SSRP1	-	-	-	-	0.453987	0.358453	25.3092	25.5533	25.3257	25.6084	25.4425	23.7753
Q09666;Q09666-2	Q09666	Neuroblast differentiation-associated protein AHNAK	AHNAK	-	-	-	YES	0.150427	0.816269	27.8232	27.5245	27.6265	27.3322	27.647	27.5438
Q10567-4;Q10567-3;Q10567-2;Q10567	Q10567-4;Q10567-3;Q10567-2;Q10567	AP-1 complex subunit beta-1	AP1B1	-	-	-	-	-0.277543	0.589152	25.4553	25.4492	25.2894	25.8461	25.7634	25.417
Q12765-3;Q12765;Q12765-2	Q12765-3;Q12765;Q12765-2	Secernin-1	SCRN1	-	-	-	-	-0.204837	0.557408	27.0574	26.6901	27.2306	26.8448	27.3162	27.4316
Q12792;Q12792-4;Q12792-3	Q12792;Q12792-4;Q12792-3	Twinfilin-1	TWF1	-	-	-	-	-0.000863333	0.997774	26.3515	25.9574	26.0701	25.9988	26.0763	26.3064
Q12805-5;Q12805-2;Q12805-4;Q12805-3;Q12805	Q12805-5;Q12805-2;Q12805-4;Q12805-3;Q12805	EGF-containing fibulin-like extracellular matrix protein 1	EFEMP1	YES	Core matrisome	ECM Glycoproteins	YES	-0.684097	0.207132	27.5421	27.3344	28.7894	28.6785	28.0889	28.9507
Q12874	Q12874	Splicing factor 3A subunit 3	SF3A3	-	-	-	-	-0.428973	0.395234	26.687	25.8392	25.8013	26.6831	26.6259	26.3055
Q12906;Q12906-7;Q12906-5;Q12906-4;Q12906-2;Q12906-6;Q12906-3;Q96SI9-2;Q96SI9	Q12906;Q12906-7;Q12906-5;Q12906-4;Q12906-2;Q12906-6;Q12906-3	Interleukin enhancer-binding factor 3	ILF3	-	-	-	-	-0.653923	0.0410797	27.0554	26.9573	26.9394	27.7565	27.5227	27.6346
Q12907	Q12907	Vesicular integral-membrane protein VIP36	LMAN2	-	-	-	YES	-0.360833	0.454547	24.9834	25.1834	26.3929	25.1497	25.9501	26.5424
Q13162	Q13162	Peroxiredoxin-4	PRDX4	-	-	-	YES	0.40763	0.167731	27.4008	27.623	27.2411	27.1843	26.8815	26.9762
Q13177;O75914-2;Q13153;Q13153-2;O75914;O75914-4;O75914-3	Q13177;O75914-2;Q13153;Q13153-2;O75914;O75914-4;O75914-3	Serine/threonine-protein kinase PAK 2;PAK-2p27;PAK-2p34;Serine/threonine-protein kinase PAK 3;Serine/threonine-protein kinase PAK 1	PAK2;PAK3;PAK1	-	-	-	-	-0.126803	0.72113	24.9856	25.8158	24.7862	25.4526	25.2897	25.2256
Q13185	Q13185	Chromobox protein homolog 3	CBX3	-	-	-	-	-0.0764533	0.788386	28.6486	28.7572	28.1955	28.8065	28.5765	28.4477
Q13200;Q13200-3;Q13200-2	Q13200;Q13200-3;Q13200-2	26S proteasome non-ATPase regulatory subunit 2	PSMD2	-	-	-	YES	-0.38941	0.265262	27.6467	27.7077	27.7438	28.4569	27.982	27.8276
Q13247-3;Q13247;Q13247-2;Q08170	Q13247-3;Q13247	Serine/arginine-rich splicing factor 6	SRSF6	-	-	-	-	0.107157	0.709502	28.4877	28.2995	28.5314	27.974	28.5778	28.4454
Q13263;Q13263-2	Q13263;Q13263-2	Transcription intermediary factor 1-beta	TRIM28	-	-	-	-	0.318027	0.253521	27.5228	27.3161	27.2701	27.2133	27.0813	26.8603
Q13283;Q13283-2	Q13283	Ras GTPase-activating protein-binding protein 1	G3BP1	-	-	-	-	-0.27068	0.235896	27.1092	26.9925	27.1004	27.5437	27.1147	27.3557
Q13308-5;Q13308-4;Q13308;Q13308-6;Q13308-2;Q13308-3	Q13308-5;Q13308-4;Q13308;Q13308-6;Q13308-2;Q13308-3	Inactive tyrosine-protein kinase 7	PTK7	-	-	-	-	-0.841067	0.0180396	26.7484	27.3382	26.9098	27.7874	27.7117	28.0206
Q13347	Q13347	Eukaryotic translation initiation factor 3 subunit I	EIF3I	-	-	-	YES	-0.26186	0.334152	27.6694	27.2503	27.435	27.8795	27.5935	27.6673
Q13404;Q13404-7;Q13404-1;Q13404-2;Q13404-8;Q13404-6	Q13404;Q13404-7;Q13404-1;Q13404-2;Q13404-8;Q13404-6	Ubiquitin-conjugating enzyme E2 variant 1	UBE2V1	-	-	-	YES	-0.00203667	0.996908	25.9243	26.7336	26.2501	26.3361	25.9585	26.6195
Q13409-6;Q13409-3;Q13409-2;Q13409-7;Q13409-5;Q13409	Q13409-6;Q13409-3;Q13409-2;Q13409-7;Q13409-5;Q13409	Cytoplasmic dynein 1 intermediate chain 2	DYNC1I2	-	-	-	-	-0.644517	0.046007	25.9803	26.0032	26.0193	26.4448	26.4826	27.0089
Q13435	Q13435	Splicing factor 3B subunit 2	SF3B2	-	-	-	-	-0.352097	0.358337	25.5238	25.0321	24.6837	25.7497	25.3881	25.1581
Q13561;Q13561-3;Q13561-2	Q13561;Q13561-3;Q13561-2	Dynactin subunit 2	DCTN2	-	-	-	YES	0.0472233	0.839864	26.4873	26.4885	26.0604	26.4573	26.3791	26.0581
Q13740-2;Q13740;Q13740-3;Q13740-4	Q13740-2;Q13740	CD166 antigen	ALCAM	-	-	-	YES	-0.729567	0.020464	28.4869	28.6086	28.5902	29.3826	29.1625	29.3291
Q13813-3;Q13813;Q13813-2	Q13813-3;Q13813;Q13813-2	Spectrin alpha chain, non-erythrocytic 1	SPTAN1	-	-	-	YES	-0.376357	0.0742585	29.5915	29.42	29.5573	29.953	29.8598	29.8852
Q13838;Q13838-2	Q13838;Q13838-2	Spliceosome RNA helicase DDX39B	DDX39B	-	-	-	-	0.2483	0.404893	28.6347	28.6091	28.3134	28.5129	28.4612	27.8382
Q14019	Q14019	Coactosin-like protein	COTL1	-	-	-	YES	-0.00815333	0.988734	26.3516	25.8512	26.5753	26.2608	26.319	26.2228
Q14103-3;Q14103;Q14103-4;Q14103-2	Q14103-3;Q14103;Q14103-4;Q14103-2	Heterogeneous nuclear ribonucleoprotein D0	HNRNPD	-	-	-	-	-0.42228	0.350699	27.8046	28.1774	29.6454	28.2311	29.1391	29.5241
Q14118	Q14118	Dystroglycan;Alpha-dystroglycan;Beta-dystroglycan	DAG1	-	-	-	YES	0.576247	0.0366118	31.0364	31.4936	31.3748	30.5471	30.5407	31.0882
Q14152;Q14152-2	Q14152;Q14152-2	Eukaryotic translation initiation factor 3 subunit A	EIF3A	-	-	-	-	-0.726743	0.0909693	27.6946	27.3823	27.4013	28.3495	28.465	27.8439
Q14204	Q14204	Cytoplasmic dynein 1 heavy chain 1	DYNC1H1	-	-	-	YES	-0.434327	0.188413	27.2131	26.9931	26.7339	27.5184	27.5998	27.1248
Q14247-3;Q14247;Q14247-2	Q14247-3;Q14247;Q14247-2	Src substrate cortactin	CTTN	-	-	-	-	-0.894783	0.251614	26.1315	25.7764	24.0676	26.1402	26.2076	26.312
Q14444-2;Q14444	Q14444-2;Q14444	Caprin-1	CAPRIN1	-	-	-	-	-0.481477	0.322393	26.1209	26.162	26.3087	26.5123	26.7898	26.7339
Q14566	Q14566	DNA replication licensing factor MCM6	MCM6	-	-	-	-	0.334403	0.470073	26.1779	26.2469	26.8514	26.3797	25.8977	25.9955
Q14696;Q14696-2	Q14696	LDLR chaperone MESD	MESDC2	-	-	-	-	-0.205247	0.815916	22.5025	25.6547	26.3315	24.2423	25.4507	25.4115
Q14697;Q14697-2	Q14697;Q14697-2	Neutral alpha-glucosidase AB	GANAB	-	-	-	YES	0.131123	0.886275	28.859	29.1912	28.6395	29.0047	29.0943	28.1975
Q14764	Q14764	Major vault protein	MVP	-	-	-	YES	0.0514167	0.862139	25.8007	25.8907	25.8701	25.8926	25.7838	25.7308
Q14847;Q14847-2;Q14847-3	Q14847;Q14847-2;Q14847-3	LIM and SH3 domain protein 1	LASP1	-	-	-	-	-0.21503	0.440127	28.8693	28.4227	28.317	28.8234	28.946	28.4847
Q14974;Q14974-2	Q14974;Q14974-2	Importin subunit beta-1	KPNB1	-	-	-	YES	0.0347933	0.891814	29.6856	29.4824	29.4717	29.6675	29.4902	29.3776
Q15008;Q15008-4;Q15008-3;Q15008-2	Q15008;Q15008-4;Q15008-3;Q15008-2	26S proteasome non-ATPase regulatory subunit 6	PSMD6	-	-	-	-	0.0632333	0.919091	25.6043	25.712	25.0551	25.6941	25.0671	25.4204
Q15019;Q15019-3;Q15019-2	Q15019;Q15019-3;Q15019-2	Septin-2	SEPT2	-	-	-	YES	-0.75779	0.0381338	26.5799	26.5749	26.3812	27.3285	27.4264	27.0544
Q15020-4;Q15020;Q15020-3;Q15020-2	Q15020-4;Q15020;Q15020-3;Q15020-2	Squamous cell carcinoma antigen recognized by T-cells 3	SART3	-	-	-	-	0.217537	0.683628	22.9112	22.7909	24.5146	23.0047	23.317	23.2425
Q15029-2;Q15029-3;Q15029	Q15029-2;Q15029-3;Q15029	116 kDa U5 small nuclear ribonucleoprotein component	EFTUD2	-	-	-	-	0.09211	0.827967	25.594	25.8431	25.4785	25.5264	25.6709	25.442
Q15046;Q15046-2	Q15046;Q15046-2	Lysine--tRNA ligase	KARS	-	-	-	-	-0.488633	0.0553895	26.1983	26.2379	26.1894	26.7461	26.5531	26.7923
Q15056-2;Q15056	Q15056-2;Q15056	Eukaryotic translation initiation factor 4H	EIF4H	-	-	-	-	0.29831	0.341268	27.6751	27.5091	27.2973	27.3249	27.4501	26.8115
Q15084-3;Q15084;Q15084-4;Q15084-5;Q15084-2	Q15084-3;Q15084;Q15084-4;Q15084-5;Q15084-2	Protein disulfide-isomerase A6	PDIA6	-	-	-	YES	-0.774453	0.00345812	27.8427	27.9107	27.69	28.6964	28.5791	28.4912
Q15102	Q15102	Platelet-activating factor acetylhydrolase IB subunit gamma	PAFAH1B3	-	-	-	-	-0.371773	0.445409	24.8556	25.4321	24.8518	25.9476	25.4504	24.8568
Q15121;Q15121-2	Q15121;Q15121-2	Astrocytic phosphoprotein PEA-15	PEA15	-	-	-	-	0.50844	0.389827	28.3343	27.9111	28.1465	27.7667	27.6084	27.4914
Q15149-7;Q15149-8;Q15149-9;Q15149-5;Q15149-4;Q15149-6;Q15149-3;Q15149-2;Q15149	Q15149-7;Q15149-8;Q15149-9;Q15149-5;Q15149-4;Q15149-6;Q15149-3;Q15149-2;Q15149	Plectin	PLEC	-	-	-	YES	-0.06765	0.853322	30.8336	30.7905	30.4513	30.7826	30.837	30.6587
Q15181	Q15181	Inorganic pyrophosphatase	PPA1	-	-	-	YES	0.38682	0.124349	28.7299	28.5603	28.4911	28.3496	28.047	28.2244
Q15185-4;Q15185;Q15185-3;Q15185-2	Q15185-4;Q15185;Q15185-3	Prostaglandin E synthase 3	PTGES3	-	-	-	-	0.366923	0.490337	28.6801	27.6405	28.1654	28.2825	27.7808	27.3219
Q15233;Q15233-2	Q15233;Q15233-2	Non-POU domain-containing octamer-binding protein	NONO	-	-	-	-	-0.174117	0.724289	27.5324	27.4823	27.361	28.103	27.6375	27.1576
Q15262-2;Q15262-3;Q15262-4;Q15262	Q15262-2;Q15262-3;Q15262-4;Q15262	Receptor-type tyrosine-protein phosphatase kappa	PTPRK	-	-	-	-	0.408177	0.082478	26.9875	27.1	27.0255	26.602	26.8365	26.4499
Q15365;P57721-2;P57721-3;P57721-5;P57721-4;P57721	Q15365	Poly(rC)-binding protein 1	PCBP1	-	-	-	YES	-0.490053	0.146453	27.4404	27.4597	26.8388	27.9864	27.824	27.3986
Q15366-6;Q15366-3;Q15366;Q15366-2;Q15366-7;Q15366-8;Q15366-4;Q15366-5	Q15366-6;Q15366-3;Q15366;Q15366-2;Q15366-7;Q15366-8;Q15366-4;Q15366-5	Poly(rC)-binding protein 2	PCBP2	-	-	-	YES	0.608883	0.154206	26.2688	25.2281	25.9536	25.7506	25.2104	24.6629
Q15369;Q15369-2	Q15369;Q15369-2	Transcription elongation factor B polypeptide 1	TCEB1	-	-	-	-	-0.47833	0.295146	24.8722	23.9815	24.5894	25.0084	24.8811	24.9886
Q15370;Q15370-2	Q15370;Q15370-2	Transcription elongation factor B polypeptide 2	TCEB2	-	-	-	-	-0.0626567	0.898205	26.092	25.0674	24.8497	26.076	25.6274	24.4937
Q15393;Q15393-3;Q15393-2	Q15393	Splicing factor 3B subunit 3	SF3B3	-	-	-	-	-0.140593	0.765229	27.6797	27.3905	27.104	27.8611	27.7154	27.0194
Q15424-2;Q15424;Q15424-4;Q15424-3	Q15424-2;Q15424;Q15424-4;Q15424-3	Scaffold attachment factor B1	SAFB	-	-	-	-	-0.152413	0.807306	25.6691	25.5186	25.7298	25.9087	25.726	25.7401
Q15459-2;Q15459	Q15459-2;Q15459	Splicing factor 3A subunit 1	SF3A1	-	-	-	-	-0.03114	0.95688	24.4836	23.3853	24.937	23.9307	24.1999	24.7687
Q15582	Q15582	Transforming growth factor-beta-induced protein ig-h3	TGFBI	YES	Core matrisome	ECM Glycoproteins	YES	3.61309	2.14192e-06	31.099	32.1338	31.3787	28.1455	27.9218	27.7049
Q15637-4;Q15637-6;Q15637-7;Q15637-3;Q15637-2;Q15637;Q15637-5	Q15637-4;Q15637-6;Q15637-7;Q15637-3;Q15637-2;Q15637;Q15637-5	Splicing factor 1	SF1	-	-	-	-	-0.65495	0.180746	24.9644	24.0165	24.7842	25.8425	25.2288	24.6587
Q15691	Q15691	Microtubule-associated protein RP/EB family member 1	MAPRE1	-	-	-	-	-0.144717	0.687134	27.611	27.6638	26.8162	27.7482	27.8999	26.877
Q15904	Q15904	V-type proton ATPase subunit S1	ATP6AP1	-	-	-	YES	0.650743	0.21449	27.9131	28.3781	28.2079	27.2471	27.6526	27.6471
Q16531;Q16531-2	Q16531	DNA damage-binding protein 1	DDB1	-	-	-	YES	0.25315	0.573197	28.3645	28.2868	28.6934	28.5408	28.3712	27.6733
Q16543	Q16543	Hsp90 co-chaperone Cdc37;Hsp90 co-chaperone Cdc37, N-terminally processed	CDC37	-	-	-	YES	-0.417707	0.13442	28.4098	28.4124	27.6808	28.7878	28.4816	28.4868
Q16555-2;Q16555;Q14195;Q14194;Q14195-2;Q14194-2	Q16555-2;Q16555	Dihydropyrimidinase-related protein 2	DPYSL2	-	-	-	YES	0.26274	0.300177	28.3104	28.3348	28.6313	28.257	27.9494	28.282
Q16576;Q16576-2	Q16576;Q16576-2	Histone-binding protein RBBP7	RBBP7	-	-	-	-	-0.331193	0.135398	28.0054	27.5857	27.4865	28.0696	27.8675	28.134
Q16643;Q16643-3;Q16643-2	Q16643;Q16643-3;Q16643-2	Drebrin	DBN1	-	-	-	-	-1.32408	0.00601712	26.37	25.6478	26.2916	27.1985	27.5236	27.5595
Q16658	Q16658	Fascin	FSCN1	-	-	-	YES	0.420387	0.39803	27.144	26.8793	27.6317	26.3902	26.9786	27.0252
Q16777;Q6FI13	Q16777;Q6FI13	Histone H2A type 2-C;Histone H2A type 2-A	HIST2H2AC;HIST2H2AA3	-	-	-	-	-0.367363	0.497853	26.9098	27.3417	27.5385	27.7639	27.5131	27.615
Q16881-5;Q16881-2;Q16881-4;Q16881-3;Q16881-6;Q16881;Q16881-7	Q16881-5;Q16881-2;Q16881-4;Q16881-3;Q16881-6;Q16881;Q16881-7	Thioredoxin reductase 1, cytoplasmic	TXNRD1	-	-	-	YES	-0.713223	0.0109144	28.1245	27.9884	28.1096	28.9324	28.828	28.6019
Q32MZ4-3;Q32MZ4-2;Q32MZ4;Q32MZ4-4	Q32MZ4-3;Q32MZ4-2;Q32MZ4;Q32MZ4-4	Leucine-rich repeat flightless-interacting protein 1	LRRFIP1	-	-	-	-	-0.8036	0.0621145	25.4737	24.1912	25.7586	25.703	25.9185	26.2127
Q6EMK4	Q6EMK4	Vasorin	VASN	-	-	-	YES	0.843703	0.149108	25.5761	25.9304	25.7054	24.8628	24.8802	24.9379
Q7KZF4	Q7KZF4	Staphylococcal nuclease domain-containing protein 1	SND1	-	-	-	YES	-0.216467	0.389509	27.9809	27.7338	27.5223	28.1277	27.9443	27.8145
Q7Z6Z7-2;Q7Z6Z7-3;Q7Z6Z7	Q7Z6Z7-2;Q7Z6Z7-3;Q7Z6Z7	E3 ubiquitin-protein ligase HUWE1	HUWE1	-	-	-	YES	-0.14638	0.819271	25.7295	25.5295	25.6822	25.9689	25.8881	25.5234
Q86SF2	Q86SF2	N-acetylgalactosaminyltransferase 7	GALNT7	-	-	-	YES	0.792027	0.231423	26.2113	25.9827	25.8023	26.347	23.6206	25.6527
Q86U42-2;Q86U42;Q92843-2	Q86U42-2;Q86U42;Q92843-2	Polyadenylate-binding protein 2	PABPN1	-	-	-	-	0.44413	0.299979	24.1627	25.0587	24.781	23.8075	24.4768	24.3857
Q86VP6-2;Q86VP6;Q86VP6-3	Q86VP6-2;Q86VP6	Cullin-associated NEDD8-dissociated protein 1	CAND1	-	-	-	YES	0.2756	0.353543	27.1727	27.1788	26.8983	27.078	26.7468	26.5983
Q86X29-6;Q86X29-5;Q86X29-4;Q86X29;Q86X29-3;Q86X29-2	Q86X29-6;Q86X29-5;Q86X29-4;Q86X29;Q86X29-3;Q86X29-2	Lipolysis-stimulated lipoprotein receptor	LSR	-	-	-	YES	1.06731	0.0019788	27.1128	27.2726	27.3394	26.0848	26.1664	26.2716
Q8NBJ4-2;Q8NBJ4	Q8NBJ4-2;Q8NBJ4	Golgi membrane protein 1	GOLM1	-	-	-	-	1.48564	0.00119143	29.2558	29.2487	30.0982	28.0491	28.2239	27.8728
Q8NBJ7;Q8NBJ7-2;Q8NBJ7-5;Q8NBJ7-3;Q8NBJ7-4	Q8NBJ7;Q8NBJ7-2;Q8NBJ7-5;Q8NBJ7-3	Sulfatase-modifying factor 2	SUMF2	-	-	-	-	-0.0498667	0.932497	25.6776	25.6694	25.6043	25.4065	25.5953	26.099
Q8NBS9;Q8NBS9-2	Q8NBS9;Q8NBS9-2	Thioredoxin domain-containing protein 5	TXNDC5	-	-	-	YES	-0.276343	0.21387	28.7247	28.8557	28.9629	29.2376	28.9833	29.1513
Q8NC51-3;Q8NC51;Q8NC51-4;Q8NC51-2	Q8NC51-3;Q8NC51;Q8NC51-4;Q8NC51-2	Plasminogen activator inhibitor 1 RNA-binding protein	SERBP1	-	-	-	YES	-0.584607	0.118537	26.1354	25.7798	26.4692	26.1283	26.6928	27.3171
Q8WUM4;Q8WUM4-2;Q8WUM4-3	Q8WUM4;Q8WUM4-2	Programmed cell death 6-interacting protein	PDCD6IP	-	-	-	YES	0.154433	0.616477	26.6992	26.4571	26.3189	26.436	26.6618	25.9141
Q8WVQ1-3;Q8WVQ1;Q8WVQ1-2	Q8WVQ1-3;Q8WVQ1	Soluble calcium-activated nucleotidase 1	CANT1	-	-	-	YES	0.183617	0.427459	27.28	27.1902	27.2881	27.233	26.991	26.9835
Q8WX77	Q8WX77	Insulin-like growth factor-binding protein-like 1	IGFBPL1	YES	Core matrisome	ECM Glycoproteins	-	0.1845	0.626256	28.13	29.1698	29.0663	29.1758	28.546	28.0908
Q8WXF1;Q8WXF1-2	Q8WXF1;Q8WXF1-2	Paraspeckle component 1	PSPC1	-	-	-	-	-0.1678	0.750427	26.0501	26.0038	25.4287	26.0965	26.4111	25.4785
Q8WXX5	Q8WXX5	DnaJ homolog subfamily C member 9	DNAJC9	-	-	-	-	0.0582267	0.81953	26.1939	26.1082	26.2336	26.1901	26.1054	26.0654
Q8WZA9	Q8WZA9	Immunity-related GTPase family Q protein	IRGQ	-	-	-	-	-0.787683	0.0542296	26.4356	26.3571	26.4701	26.7739	27.673	27.1788
Q92520	Q92520	Protein FAM3C	FAM3C	-	-	-	YES	-0.646493	0.0531626	26.6576	26.4502	26.8679	27.7108	27.4708	26.7335
Q92598-2;Q92598-3;Q92598;Q92598-4	Q92598-2;Q92598-3;Q92598;Q92598-4	Heat shock protein 105 kDa	HSPH1	-	-	-	YES	-0.247	0.268435	27.5058	27.6697	27.6804	28.0438	27.6921	27.8609
Q92626;Q92626-2	Q92626	Peroxidasin homolog	PXDN	YES	Core matrisome	ECM Glycoproteins	YES	-0.723937	0.331533	28.97	29.728	28.7123	30.1487	30.3023	29.1311
Q92688-2;Q92688	Q92688-2;Q92688	Acidic leucine-rich nuclear phosphoprotein 32 family member B	ANP32B	-	-	-	YES	0.26762	0.747631	27.1506	24.6053	27.0997	27.3605	26.8057	23.8865
Q92692-2;Q92692	Q92692-2;Q92692	Nectin-2	PVRL2	-	-	-	-	-0.897527	0.0318368	26.1346	26.5379	25.951	27.4444	27.2251	26.6466
Q92734-2;Q92734;Q92734-4;Q92734-3	Q92734-2;Q92734;Q92734-4;Q92734-3	Protein TFG	TFG	-	-	-	-	-0.0965333	0.838332	26.2048	25.7919	25.6751	26.689	25.9403	25.3321
Q92769-3;Q92769;Q13547;O15379;O15379-2	Q92769-3;Q92769;Q13547	Histone deacetylase 2;Histone deacetylase 1	HDAC2;HDAC1	-	-	-	-	0.110543	0.826636	25.3424	23.9446	25.2566	23.6327	25.0706	25.5088
Q92820	Q92820	Gamma-glutamyl hydrolase	GGH	-	-	-	YES	-0.323873	0.202702	30.5862	30.154	30.0246	30.9915	30.4807	30.2643
Q92841-1;Q92841-3;Q92841-2;Q92841;O15523-2;O15523	Q92841-1;Q92841-3;Q92841-2;Q92841	Probable ATP-dependent RNA helicase DDX17	DDX17	-	-	-	-	0.352943	0.251274	25.6486	25.2181	24.9874	25.1141	25.0219	24.6594
Q92859-3;Q92859-2;Q92859-4;Q92859	Q92859-3;Q92859-2;Q92859-4;Q92859	Neogenin	NEO1	-	-	-	-	-1.01075	0.016171	25.3768	25.0606	24.5453	25.9964	25.6584	26.3601
Q92896;Q92896-3;Q92896-2	Q92896;Q92896-3;Q92896-2	Golgi apparatus protein 1	GLG1	-	-	-	YES	0.261847	0.458209	27.4615	27.6066	27.2524	27.426	27.2753	26.8336
Q92900-2;Q92900	Q92900-2;Q92900	Regulator of nonsense transcripts 1	UPF1	-	-	-	-	-0.11095	0.804427	23.9443	23.6694	23.4313	23.7185	23.7154	23.944
Q92945	Q92945	Far upstream element-binding protein 2	KHSRP	-	-	-	-	-0.32861	0.22362	27.5777	27.22	27.1067	27.7106	27.8303	27.3493
Q96AE4;Q96AE4-2;Q96I24-2	Q96AE4;Q96AE4-2	Far upstream element-binding protein 1	FUBP1	-	-	-	-	0.2069	0.655066	27.1293	26.5602	26.8301	26.5239	27.0267	26.3483
Q96C19;Q9BUP0-2;Q9BUP0	Q96C19	EF-hand domain-containing protein D2	EFHD2	-	-	-	-	-0.09852	0.875075	25.0356	24.7049	25.3714	25.3039	24.9618	25.1418
Q96C90;P53671-3	Q96C90	Protein phosphatase 1 regulatory subunit 14B	PPP1R14B	-	-	-	-	-0.125947	0.847963	26.3511	26.3586	26.7205	26.4138	26.5828	26.8115
Q96CT7	Q96CT7	Coiled-coil domain-containing protein 124	CCDC124	-	-	-	-	-0.740153	0.0263126	25.7511	25.5075	25.5406	26.227	26.5024	26.2904
Q96D15	Q96D15	Reticulocalbin-3	RCN3	-	-	-	-	0.41826	0.144868	25.3344	25.4182	25.5979	24.9224	24.6342	25.5391
Q96FW1;Q96FW1-2	Q96FW1;Q96FW1-2	Ubiquitin thioesterase OTUB1	OTUB1	-	-	-	YES	-0.132957	0.588971	27.5512	27.3878	27.3355	27.5943	27.3789	27.7002
Q96G03;Q96G03-2	Q96G03	Phosphoglucomutase-2	PGM2	-	-	-	YES	-0.58054	0.0596105	27.6142	27.0879	26.9052	27.8551	28.1023	27.3915
Q96KP4;Q96KP4-2	Q96KP4;Q96KP4-2	Cytosolic non-specific dipeptidase	CNDP2	-	-	-	YES	-1.10019	0.000314107	26.8208	26.8019	26.3896	27.7611	27.7652	27.7866
Q96RS6;Q96RS6-2;Q96RS6-3	Q96RS6;Q96RS6-2;Q96RS6-3	NudC domain-containing protein 1	NUDCD1	-	-	-	-	-0.591957	0.335548	26.975	26.4794	26.6009	27.5565	27.2076	27.067
Q96TA1-2;Q96TA1	Q96TA1-2;Q96TA1	Niban-like protein 1	FAM129B	-	-	-	YES	0.49265	0.285815	26.0058	25.1019	25.5389	25.5649	24.9801	24.6236
Q99426-2;Q99426	Q99426-2;Q99426	Tubulin-folding cofactor B	TBCB	-	-	-	-	-0.36744	0.409734	25.4189	25.508	26.2108	25.3137	25.9869	26.9394
Q99436;Q99436-2	Q99436	Proteasome subunit beta type-7	PSMB7	-	-	-	-	-0.01775	0.948935	28.0227	27.4871	27.5555	27.8837	27.6651	27.5699
Q99471;Q99471-2;Q99471-3	Q99471;Q99471-2;Q99471-3	Prefoldin subunit 5	PFDN5	-	-	-	-	-0.52601	0.376332	25.8512	24.8408	25.468	26.2632	25.8858	25.589
Q99497	Q99497	Protein deglycase DJ-1	PARK7	-	-	-	YES	-0.0487	0.860771	27.9246	28.0682	28.1396	28.0138	27.9938	28.2709
Q99584	Q99584	Protein S100-A13	S100A13	YES	Matrisome-associated	Secreted Factors	-	-0.25016	0.606877	26.215	25.2388	24.6727	24.9734	25.686	26.2176
Q99613;Q99613-2;B5ME19	Q99613;Q99613-2;B5ME19	Eukaryotic translation initiation factor 3 subunit C;Eukaryotic translation initiation factor 3 subunit C-like protein	EIF3C;EIF3CL	-	-	-	-	-0.41526	0.259533	27.0263	26.8703	27.1416	27.1753	27.635	27.4737
Q99715-4;Q99715;Q99715-2	Q99715-4;Q99715	Collagen alpha-1(XII) chain	COL12A1	YES	Core matrisome	Collagens	YES	-0.07059	0.881452	30.4254	30.9523	30.2552	30.8024	30.9551	30.0872
Q99729-3;Q99729-2;Q99729-4;Q99729	Q99729-3;Q99729-2;Q99729-4;Q99729	Heterogeneous nuclear ribonucleoprotein A/B	HNRNPAB	-	-	-	-	-0.998793	0.00376999	27.058	26.8623	27.3288	28.3233	27.8577	28.0644
Q99733;Q99733-2	Q99733;Q99733-2	Nucleosome assembly protein 1-like 4	NAP1L4	-	-	-	-	-0.35723	0.611183	27.0621	26.8494	26.8442	27.4121	27.2657	27.1496
Q99829	Q99829	Copine-1	CPNE1	-	-	-	YES	0.38655	0.241403	26.4754	26.4137	25.9594	26.1522	25.9418	25.595
Q99832-3;Q99832;Q99832-4;Q99832-2	Q99832-3;Q99832;Q99832-4;Q99832-2	T-complex protein 1 subunit eta	CCT7	-	-	-	YES	-0.193103	0.577568	26.8115	26.3705	26.8416	26.8374	26.793	26.9725
Q99873-3;Q99873-2;Q99873-4;Q99873;Q9NR22-2;Q9NR22	Q99873-3;Q99873-2;Q99873-4;Q99873	Protein arginine N-methyltransferase 1	PRMT1	-	-	-	-	-0.00262667	0.994267	27.98	27.6224	27.2807	27.9413	27.6072	27.3424
Q9BQT9;Q9BQT9-2	Q9BQT9;Q9BQT9-2	Calsyntenin-3	CLSTN3	-	-	-	-	1.43207	7.60774e-05	27.2104	27.7426	26.8485	25.8978	25.8344	25.7731
Q9BR76;A9Z1Z3-3;A9Z1Z3	Q9BR76	Coronin-1B	CORO1B	-	-	-	YES	-0.297	0.233182	26.8547	26.3703	26.8112	27.0017	26.8601	27.0654
Q9BRK5;Q9BRK5-6;Q9BRK5-2;Q9BRK5-4;Q9BRK5-3;Q9BRK5-5	Q9BRK5;Q9BRK5-6;Q9BRK5-2	45 kDa calcium-binding protein	SDF4	-	-	-	YES	0.671563	0.025364	28.7563	29.1663	29.3177	28.1269	28.2664	28.8322
Q9BS26	Q9BS26	Endoplasmic reticulum resident protein 44	ERP44	-	-	-	YES	0.11922	0.841533	26.6026	26.5718	26.1621	26.7305	26.4901	25.7582
Q9BT78;Q9BT78-2	Q9BT78;Q9BT78-2	COP9 signalosome complex subunit 4	COPS4	-	-	-	-	-0.0576833	0.906219	25.749	25.6543	25.8328	25.6685	25.7586	25.9821
Q9BV57;Q9BV57-2	Q9BV57;Q9BV57-2	1,2-dihydroxy-3-keto-5-methylthiopentene dioxygenase	ADI1	-	-	-	-	-0.413663	0.264812	24.9925	24.8324	24.6839	25.4426	25.0781	25.229
Q9BVG4	Q9BVG4	Protein PBDC1	PBDC1	-	-	-	-	-0.69546	0.23913	27.2817	27.223	26.8547	27.9985	27.6909	27.7564
Q9BWD1;Q9BWD1-2	Q9BWD1;Q9BWD1-2	Acetyl-CoA acetyltransferase, cytosolic	ACAT2	-	-	-	YES	-0.407357	0.246531	26.055	25.9681	24.9563	26.3186	26.1146	25.7683
Q9GZL7	Q9GZL7	Ribosome biogenesis protein WDR12	WDR12	-	-	-	-	0.142513	0.781845	24.6723	24.5193	24.539	23.2595	25.0861	24.9576
Q9H0D6-2;Q9H0D6	Q9H0D6-2;Q9H0D6	5-3 exoribonuclease 2	XRN2	-	-	-	-	-0.143063	0.808684	25.1337	25.0288	24.8424	25.1348	25.3051	24.9942
Q9H0U4;P62820;P62820-3;P62820-2;Q92928;Q92930;P61006-2;P61006	Q9H0U4;P62820	Ras-related protein Rab-1B;Ras-related protein Rab-1A	RAB1B;RAB1A	-	-	-	-	0.244227	0.266289	25.9712	26.1464	25.8256	25.8446	25.8304	25.5355
Q9HAV7	Q9HAV7	GrpE protein homolog 1, mitochondrial	GRPEL1	-	-	-	-	0.381863	0.504179	25.6303	25.5635	24.8391	24.83	25.453	24.6043
Q9HB07	Q9HB07	UPF0160 protein MYG1, mitochondrial	C12orf10	-	-	-	-	0.153813	0.76121	26.0087	25.6044	25.4912	25.8559	25.4293	25.3577
Q9HC38-2;Q9HC38;Q9HC38-3	Q9HC38-2;Q9HC38;Q9HC38-3	Glyoxalase domain-containing protein 4	GLOD4	-	-	-	YES	-1.1308	0.00516431	24.6797	24.1862	25.3722	25.8225	26.0333	25.7747
Q9HD42	Q9HD42	Charged multivesicular body protein 1a	CHMP1A	-	-	-	YES	-0.132733	0.786492	23.7693	24.0194	23.8901	23.9551	24.1022	24.0197
Q9NPH3-3;Q9NPH3-2;Q9NPH3;Q9NPH3-5	Q9NPH3-3;Q9NPH3-2;Q9NPH3;Q9NPH3-5	Interleukin-1 receptor accessory protein	IL1RAP	-	-	-	-	0.778533	0.0535754	25.202	25.5088	25.932	24.6343	24.5854	25.0876
Q9NPR2-2;Q9NPR2	Q9NPR2-2;Q9NPR2	Semaphorin-4B	SEMA4B	YES	Matrisome-associated	ECM-affiliated Proteins	-	2.95222	1.11682e-07	27.3527	27.5729	27.2039	23.7293	24.7402	24.8033
Q9NQG5	Q9NQG5	Regulation of nuclear pre-mRNA domain-containing protein 1B	RPRD1B	-	-	-	-	0.05418	0.867933	25.0907	25.0438	24.6611	25.0983	24.9958	24.539
Q9NRX4-2;Q9NRX4	Q9NRX4-2;Q9NRX4	14 kDa phosphohistidine phosphatase	PHPT1	-	-	-	YES	0.448473	0.400269	26.4205	26.3916	25.7156	25.6981	26.1604	25.3238
Q9NUQ9;Q9NUQ9-2;Q9H0Q0	Q9NUQ9;Q9NUQ9-2	Protein FAM49B	FAM49B	-	-	-	YES	-0.50613	0.255747	25.3762	25.7511	25.0901	26.2872	25.9473	25.5014
Q9NVA2;Q9NVA2-2;Q14141-2;Q14141-4;Q14141;Q14141-3;Q9P0V9-3;Q9P0V9;Q9P0V9-2	Q9NVA2;Q9NVA2-2	Septin-11	SEPT11	-	-	-	-	-0.380317	0.290759	27.874	27.3589	27.8488	28.2215	27.8504	28.1507
Q9NX46	Q9NX46	Poly(ADP-ribose) glycohydrolase ARH3	ADPRHL2	-	-	-	-	-0.69029	0.0552841	25.5997	25.178	25.4539	25.9271	26.1031	26.2722
Q9NY33;Q9NY33-4;Q9NY33-2	Q9NY33;Q9NY33-4	Dipeptidyl peptidase 3	DPP3	-	-	-	YES	-0.0356967	0.865196	26.9616	27.3798	27.2175	27.3339	27.2033	27.1288
Q9NZL9;Q9NZL9-3;Q9NZL9-4;Q9NZL9-2;Q9NZL9-5	Q9NZL9;Q9NZL9-3;Q9NZL9-4;Q9NZL9-2	Methionine adenosyltransferase 2 subunit beta	MAT2B	-	-	-	YES	-0.774837	0.0119034	26.2844	26.1995	26.4683	27.1757	27.095	27.006
Q9NZT1	Q9NZT1	Calmodulin-like protein 5	CALML5	-	-	-	-	-0.174357	0.818038	27.6866	27.1775	28.5508	26.5593	29.0258	28.3529
Q9NZZ3;Q9NZZ3-2	Q9NZZ3;Q9NZZ3-2	Charged multivesicular body protein 5	CHMP5	-	-	-	YES	0.101843	0.646533	25.937	25.8849	25.903	25.9418	25.835	25.6426
Q9P2E9-3;Q9P2E9-2;Q9P2E9;Q8N4C6-6;Q8N4C6-11;Q8N4C6-4;Q8N4C6-9;Q8N4C6-2;Q8N4C6;Q8N4C6-5;Q8N4C6-10;Q8N4C6-7	Q9P2E9-3;Q9P2E9-2;Q9P2E9	Ribosome-binding protein 1	RRBP1	-	-	-	-	-0.07292	0.884449	25.7086	25.5162	25.387	25.4745	25.8327	25.5234
Q9UBS4	Q9UBS4	DnaJ homolog subfamily B member 11	DNAJB11	-	-	-	-	0.138473	0.753692	25.8663	25.4934	25.9163	26.0995	25.2591	25.502
Q9UBT2;Q9UBT2-2	Q9UBT2;Q9UBT2-2	SUMO-activating enzyme subunit 2	UBA2	-	-	-	-	0.30293	0.46649	25.7723	25.4933	25.3971	25.73	25.2561	24.7678
Q9UHD8-7;Q9UHD8-2;Q9UHD8-5;Q9UHD8;Q9UHD8-3;Q9UHD8-4;Q9UHD8-9;Q9UHD8-8	Q9UHD8-7;Q9UHD8-2;Q9UHD8-5;Q9UHD8;Q9UHD8-3;Q9UHD8-4;Q9UHD8-9;Q9UHD8-8	Septin-9	SEPT9	-	-	-	-	-0.50724	0.324086	24.5181	23.4178	24.3642	24.675	24.8976	24.2492
Q9UHV9	Q9UHV9	Prefoldin subunit 2	PFDN2	-	-	-	-	-0.325187	0.632186	26.8453	26.657	26.5489	27.2806	26.956	26.7902
Q9UJU6;Q9UJU6-5	Q9UJU6;Q9UJU6-5	Drebrin-like protein	DBNL	-	-	-	YES	-0.0508	0.850891	26.2996	25.9171	26.2389	26.1476	26.3572	26.1033
Q9UK76;Q9UK76-2;Q9UK76-3	Q9UK76;Q9UK76-2	Hematological and neurological expressed 1 protein;Hematological and neurological expressed 1 protein, N-terminally processed	HN1	-	-	-	-	0.0655067	0.903616	26.452	24.2907	26.5654	25.4603	25.3354	26.3158
Q9UKK9	Q9UKK9	ADP-sugar pyrophosphatase	NUDT5	-	-	-	YES	-0.47195	0.0857515	26.9799	26.7905	26.8749	27.457	27.2349	27.3693
Q9UKY7-2;Q9UKY7;Q9UKY7-3	Q9UKY7-2;Q9UKY7	Protein CDV3 homolog	CDV3	-	-	-	-	-0.338007	0.567911	24.572	24.6354	25.5258	25.4282	24.9104	25.4086
Q9UL46	Q9UL46	Proteasome activator complex subunit 2	PSME2	-	-	-	YES	-0.445967	0.610228	28.0435	27.5477	27.6687	28.4258	28.2726	27.8994
Q9ULV4;Q9ULV4-2;Q9ULV4-3;Q6QEF8-4;Q6QEF8-3;Q6QEF8-2;Q6QEF8-5;Q6QEF8	Q9ULV4;Q9ULV4-2;Q9ULV4-3	Coronin-1C	CORO1C	-	-	-	-	-0.411617	0.205808	28.5078	28.6193	28.0751	28.8544	28.9033	28.6794
Q9UMS4	Q9UMS4	Pre-mRNA-processing factor 19	PRPF19	-	-	-	-	-0.256443	0.525721	26.0986	26.0529	25.5713	26.6655	25.8809	25.9458
Q9UNF0-2;Q9UNF0	Q9UNF0-2;Q9UNF0	Protein kinase C and casein kinase substrate in neurons protein 2	PACSIN2	-	-	-	YES	-0.424533	0.229407	24.7167	23.7241	24.7308	24.8324	24.7261	24.8866
Q9UNH7;Q9UNH7-2	Q9UNH7;Q9UNH7-2	Sorting nexin-6;Sorting nexin-6, N-terminally processed	SNX6	-	-	-	-	0.07985	0.819131	24.2416	23.9958	23.8241	23.9514	24.0863	23.7843
Q9UNM6;Q9UNM6-2	Q9UNM6;Q9UNM6-2	26S proteasome non-ATPase regulatory subunit 13	PSMD13	-	-	-	-	-0.349923	0.561512	26.5303	26.0498	26.1095	26.8823	26.4518	26.4054
Q9UNS2;Q9UNS2-2	Q9UNS2;Q9UNS2-2	COP9 signalosome complex subunit 3	COPS3	-	-	-	-	-0.0555933	0.898791	24.8077	24.9364	24.486	24.821	25.2396	24.3363
Q9UNZ2;Q9UNZ2-5;Q9UNZ2-4;Q9UNZ2-6	Q9UNZ2;Q9UNZ2-5;Q9UNZ2-4;Q9UNZ2-6	NSFL1 cofactor p47	NSFL1C	-	-	-	-	-0.0715	0.868947	26.3122	26.3167	26.2432	26.1291	26.3868	26.5708
Q9UQ80;Q9UQ80-2	Q9UQ80;Q9UQ80-2	Proliferation-associated protein 2G4	PA2G4	-	-	-	YES	0.168947	0.582432	29.5379	29.2829	29.2886	29.1886	29.3703	29.0436
Q9Y224	Q9Y224	UPF0568 protein C14orf166	C14orf166	-	-	-	-	-0.395897	0.262049	24.5796	23.6775	24.0526	24.8361	24.487	24.1743
Q9Y230;Q9Y230-2	Q9Y230;Q9Y230-2	RuvB-like 2	RUVBL2	-	-	-	YES	0.215453	0.411895	27.7876	27.9941	27.8306	27.6087	27.7263	27.6309
Q9Y262-2;Q9Y262	Q9Y262-2;Q9Y262	Eukaryotic translation initiation factor 3 subunit L	EIF3L	-	-	-	-	-0.30844	0.377125	26.8	26.8435	26.4455	27.3314	27.2968	26.386
Q9Y265;Q9Y265-2	Q9Y265;Q9Y265-2	RuvB-like 1	RUVBL1	-	-	-	YES	0.603287	0.0706821	26.8467	27.4771	26.37	26.4924	26.231	26.1605
Q9Y266	Q9Y266	Nuclear migration protein nudC	NUDC	-	-	-	-	-0.798313	0.0180364	26.3053	26.0352	26.4699	27.0529	27.0822	27.0702
Q9Y2B0;Q9Y2B0-2	Q9Y2B0	Protein canopy homolog 2	CNPY2	-	-	-	-	0.82617	0.0399763	26.8455	26.5776	26.899	26.0455	25.5962	26.2019
Q9Y383;Q96HJ9-2;Q9Y383-3;Q9Y383-2	Q9Y383;Q96HJ9-2;Q9Y383-3;Q9Y383-2	Putative RNA-binding protein Luc7-like 2	LUC7L2	-	-	-	-	-0.524763	0.335894	25.1542	23.7799	25.3306	25.2029	25.269	25.3671
Q9Y3B8-3;Q9Y3B8-2	Q9Y3B8-3;Q9Y3B8-2	Oligoribonuclease, mitochondrial	REXO2	-	-	-	-	-0.36453	0.274906	27.0357	26.2982	26.9633	26.9835	27.5846	26.8227
Q9Y3F4;Q9Y3F4-2	Q9Y3F4;Q9Y3F4-2	Serine-threonine kinase receptor-associated protein	STRAP	-	-	-	-	0.0323967	0.941871	26.3693	25.9319	26.1218	26.3063	26.0075	26.012
Q9Y3I0	Q9Y3I0	tRNA-splicing ligase RtcB homolog	RTCB	-	-	-	-	-0.3709	0.176552	24.7882	24.751	24.834	25.2601	25.2067	25.019
Q9Y490;Q9Y4G6	Q9Y490	Talin-1	TLN1	-	-	-	YES	-0.304167	0.223898	28.308	28.4998	28.0844	28.7511	28.6828	28.3709
Q9Y4L1;Q9Y4L1-2	Q9Y4L1;Q9Y4L1-2	Hypoxia up-regulated protein 1	HYOU1	-	-	-	YES	0.136613	0.794743	26.8295	27.2164	26.9799	27.0802	26.736	26.7998
Q9Y4Y9;Q9Y4Y9-2	Q9Y4Y9;Q9Y4Y9-2	U6 snRNA-associated Sm-like protein LSm5	LSM5	-	-	-	-	-0.0484433	0.939884	26.0693	26.3121	25.4672	25.9353	26.2122	25.8465
Q9Y5B9	Q9Y5B9	FACT complex subunit SPT16	SUPT16H	-	-	-	-	-0.20282	0.487173	26.7603	26.6893	26.7498	27.1233	26.8986	26.7859
Q9Y5S9;Q9Y5S9-2	Q9Y5S9;Q9Y5S9-2	RNA-binding protein 8A	RBM8A	-	-	-	-	-0.0254833	0.929189	27.0794	26.9241	27.1547	27.0334	27.1588	27.0425
Q9Y678	Q9Y678	Coatomer subunit gamma-1	COPG1	-	-	-	-	0.31495	0.407109	26.6795	26.1315	26.7199	26.4803	26.3312	25.7745
Q9Y696	Q9Y696	Chloride intracellular channel protein 4	CLIC4	-	-	-	YES	0.35199	0.455059	26.8827	27.3998	26.6937	26.5961	26.7225	26.6017

## Sheet: Supplementary Table 1d
Supplementary Table 1 - Mass spectrometry-based proteomic analysis of breast cancer cell secretomes
MDA-Brain vs MDA-WT
										LFQ intensity
										MDA-Brain			MDA-WT
Protein IDs	Majority protein IDs	Protein names	Gene names	Matrisome	Division	Category	Exosome	log2(MDA-Brain/MDA-WT)	p value (MDA-Brain vs MDA-WT)	R1	R2	R3	R1	R2	R3
Q13765;E9PAV3-2;E9PAV3;Q9BZK3	Q13765;E9PAV3-2;E9PAV3	Nascent polypeptide-associated complex subunit alpha;Nascent polypeptide-associated complex subunit alpha, muscle-specific form	NACA	-	-	-	-	-0.129837	0.605164	28.259	27.6515	28.4035	28.5057	28.0875	28.1104
O00115-2;O00115	O00115-2;O00115	Deoxyribonuclease-2-alpha	DNASE2	-	-	-	YES	-0.313727	0.312921	27.6956	27.801	27.79	28.0832	28.2934	27.8511
O00151	O00151	PDZ and LIM domain protein 1	PDLIM1	-	-	-	-	0.499273	0.331454	26.2436	26.1691	26.1587	26.7312	25.9872	24.3551
O00170	O00170	AH receptor-interacting protein	AIP	-	-	-	-	-0.291193	0.416816	24.1707	24.8444	24.0475	24.6855	24.5721	24.6786
O00231;O00231-2	O00231;O00231-2	26S proteasome non-ATPase regulatory subunit 11	PSMD11	-	-	-	-	-0.0746333	0.789559	26.3546	26.2184	26.089	26.2897	26.4716	26.1246
O00233;O00233-2;O00233-3	O00233;O00233-2	26S proteasome non-ATPase regulatory subunit 9	PSMD9	-	-	-	-	0.521117	0.19614	25.5499	25.2017	25.5191	25.492	23.8861	25.3292
O00299	O00299	Chloride intracellular channel protein 1	CLIC1	-	-	-	YES	-0.178643	0.499978	30.3099	29.9311	29.7375	30.1976	30.2528	30.0639
O00303	O00303	Eukaryotic translation initiation factor 3 subunit F	EIF3F	-	-	-	-	0.176803	0.663009	27.828	27.7157	27.0954	27.6613	27.4689	26.9785
O00391;O00391-2;Q8WWX9	O00391;O00391-2	Sulfhydryl oxidase 1	QSOX1	-	-	-	YES	0.01377	0.948467	34.0951	34.3409	34.1785	34.2502	34.2437	34.0793
O00410;O00410-3;O00410-2;O60518	O00410;O00410-3;O00410-2	Importin-5	IPO5	-	-	-	-	0.126217	0.790253	29.6219	29.0543	29.0988	29.9258	29.0428	28.4278
O00468-6;O00468-3;O00468-7;O00468-5;O00468-4;O00468;O00468-2	O00468-6;O00468-3;O00468-7;O00468-5;O00468-4;O00468;O00468-2	Agrin;Agrin N-terminal 110 kDa subunit;Agrin C-terminal 110 kDa subunit;Agrin C-terminal 90 kDa fragment;Agrin C-terminal 22 kDa fragment	AGRN	YES	Core matrisome	ECM Glycoproteins	YES	-0.13209	0.608776	29.5868	29.7493	29.8193	29.983	29.8852	29.6833
O00487	O00487	26S proteasome non-ATPase regulatory subunit 14	PSMD14	-	-	-	-	0.58884	0.269874	26.0624	25.5929	25.5342	26.0765	25.416	23.9304
O00560;O00560-3;O00560-2	O00560;O00560-3;O00560-2	Syntenin-1	SDCBP	-	-	-	YES	-0.135753	0.664621	26.5311	26.4678	26.574	26.7748	26.9221	26.2833
O00584;O00584-2;Q07343-4;Q07343-2;Q07343-3;Q07343	O00584	Ribonuclease T2	RNASET2	-	-	-	YES	-0.332857	0.255626	26.6596	27.1312	27.7509	27.5635	27.4949	27.482
O00764;O00764-3;O00764-2	O00764;O00764-3;O00764-2	Pyridoxal kinase	PDXK	-	-	-	YES	-0.377357	0.390876	24.2823	24.178	23.7854	24.0539	24.9256	24.3983
O14579;O14579-2;O14579-3	O14579;O14579-2;O14579-3	Coatomer subunit epsilon	COPE	-	-	-	-	0.0732567	0.836551	27.1333	26.2323	26.748	26.9493	26.6165	26.3281
O14737;O14737-2	O14737;O14737-2	Programmed cell death protein 5	PDCD5	-	-	-	YES	-0.01296	0.961236	27.2814	26.767	26.7803	27.003	27.1441	26.7204
O14744-5;O14744;O14744-3;O14744-2;O14744-4	O14744-5;O14744;O14744-3;O14744-2;O14744-4	Protein arginine N-methyltransferase 5;Protein arginine N-methyltransferase 5, N-terminally processed	PRMT5	-	-	-	-	0.174163	0.739586	26.0569	25.6401	25.7297	25.8213	25.9104	25.1725
O14745;O14745-2	O14745;O14745-2	Na(+)/H(+) exchange regulatory cofactor NHE-RF1	SLC9A3R1	-	-	-	YES	-0.329767	0.372943	26.5086	25.7402	26.2792	26.2641	26.5373	26.7159
O14786-3;O14786-2;O14786	O14786-3;O14786-2;O14786	Neuropilin-1	NRP1	-	-	-	-	-0.2038	0.353751	28.3338	28.6927	28.5398	28.8249	28.6197	28.7331
O14818;O14818-2;O14818-4;Q8TAA3-2;Q8TAA3-5;Q8TAA3	O14818;O14818-2	Proteasome subunit alpha type-7	PSMA7	-	-	-	YES	-0.09323	0.714574	28.0672	27.6761	27.984	28.3628	27.9191	27.7252
O14974-5;O14974-4;O14974-3;O14974;O14974-2	O14974-5;O14974-4;O14974-3;O14974;O14974-2	Protein phosphatase 1 regulatory subunit 12A	PPP1R12A	-	-	-	-	-0.366873	0.214698	26.0452	25.4572	25.3799	25.9585	26.1308	25.8936
O14979-3;O14979-2;O14979	O14979-3;O14979-2;O14979	Heterogeneous nuclear ribonucleoprotein D-like	HNRNPDL	-	-	-	-	-0.0021	0.997352	26.9126	25.8054	26.632	26.7056	26.4201	26.2307
O15067	O15067	Phosphoribosylformylglycinamidine synthase	PFAS	-	-	-	YES	0.136703	0.862331	27.1718	26.7684	26.8898	26.8499	26.8902	26.6798
O15160-2;O15160	O15160-2;O15160	DNA-directed RNA polymerases I and III subunit RPAC1	POLR1C	-	-	-	-	0.135103	0.728835	25.2189	25.3638	25.493	25.2391	25.2984	25.1328
O15212	O15212	Prefoldin subunit 6	PFDN6	-	-	-	-	-0.184313	0.590665	26.2193	25.8361	26.1507	26.3911	26.257	26.1109
O15230;O15230-2;Q16787-3;Q16787	O15230	Laminin subunit alpha-5	LAMA5	YES	Core matrisome	ECM Glycoproteins	YES	-0.0717933	0.812567	28.5342	28.6774	28.7739	28.9116	28.9611	28.3283
O15231;O15231-3;O15231-6;O15231-5;O15231-4;O15231-7;O15231-8;O15231-2;O15231-9	O15231;O15231-3;O15231-6;O15231-5;O15231-4;O15231-7;O15231-8;O15231-2	Zinc finger protein 185	ZNF185	-	-	-	-	-0.0853333	0.771695	26.5992	25.9643	26.1534	26.038	26.3609	26.574
O15355	O15355	Protein phosphatase 1G	PPM1G	-	-	-	-	-0.228623	0.284499	28.0535	27.6538	27.6854	28.1132	27.9586	28.0066
O43390-4;O43390;O43390-2;O43390-3	O43390-4;O43390;O43390-2;O43390-3	Heterogeneous nuclear ribonucleoprotein R	HNRNPR	-	-	-	-	0.0853967	0.688549	25.6159	25.3645	25.374	25.2405	25.4992	25.3584
O43396	O43396	Thioredoxin-like protein 1	TXNL1	-	-	-	-	-0.08952	0.667916	26.6941	26.2123	26.5633	26.6417	26.4333	26.6632
O43399;O43399-5;O43399-7;O43399-2;O43399-4;O43399-3;O43399-6	O43399;O43399-5;O43399-7;O43399-2;O43399-4;O43399-3;O43399-6	Tumor protein D54	TPD52L2	-	-	-	-	-0.128273	0.712412	26.9503	26.2698	26.4165	26.8638	26.8831	26.2744
O43491-4;O43491;O43491-2;O43491-3	O43491-4;O43491;O43491-2;O43491-3	Band 4.1-like protein 2	EPB41L2	-	-	-	YES	-0.175577	0.573493	25.2192	24.4679	24.493	24.7109	25.0822	24.9138
O43493-4;O43493-2;O43493-5;O43493-3;O43493;O43493-6	O43493-4;O43493-2;O43493-5;O43493-3;O43493	Trans-Golgi network integral membrane protein 2	TGOLN2	-	-	-	-	-0.673453	0.164852	25.4841	24.885	25.9272	25.3658	26.7179	26.2329
O43681	O43681	ATPase ASNA1	ASNA1	-	-	-	YES	-0.145667	0.744594	26.373	25.3508	25.5672	26.2628	25.9552	25.5101
O43684-2;O43684	O43684-2;O43684	Mitotic checkpoint protein BUB3	BUB3	-	-	-	-	0.1668	0.794077	26.0244	25.1795	25.6172	25.3882	25.6394	25.2931
O43707;O43707-2;O43707-3;Q9H254-2;Q9H254-4;Q9H254	O43707;O43707-2;O43707-3	Alpha-actinin-4	ACTN4	-	-	-	YES	0.0179533	0.926273	32.5603	32.1673	32.4491	32.4294	32.2924	32.4011
O43852;O43852-3;O43852-6;O43852-2;O43852-4;O43852-5;O43852-15;O43852-10;O43852-9;O43852-13;O43852-14;O43852-11;O43852-8;O43852-12;O43852-7	O43852;O43852-3;O43852-6;O43852-2;O43852-4;O43852-5;O43852-15;O43852-10	Calumenin	CALU	-	-	-	-	-0.195657	0.512408	29.4321	28.8682	29.257	29.3807	29.1337	29.6297
O60506-4;O60506-3;O60506-2;O60506;O60506-5	O60506-4;O60506-3;O60506-2;O60506;O60506-5	Heterogeneous nuclear ribonucleoprotein Q	SYNCRIP	-	-	-	-	-0.377093	0.41064	27.0658	26.8605	25.8726	27.29	27.1826	26.4575
O60568	O60568	Procollagen-lysine,2-oxoglutarate 5-dioxygenase 3	PLOD3	YES	Matrisome-associated	ECM Regulators	YES	-0.1881	0.478008	27.0385	27.0917	26.7073	27.2276	27.2474	26.9268
Q99879;Q99877;Q93079;Q5QNW6;P62807;P58876;P57053;O60814;Q5QNW6-2;Q99880;Q16778;P33778;P23527;P06899;Q8N257;Q96A08	Q99879;Q99877;Q93079;Q5QNW6;P62807;P58876;P57053;O60814;Q5QNW6-2;Q99880;Q16778;P33778;P23527;P06899	Histone H2B type 1-M;Histone H2B type 1-N;Histone H2B type 1-H;Histone H2B type 2-F;Histone H2B type 1-C/E/F/G/I;Histone H2B type 1-D;Histone H2B type F-S;Histone H2B type 1-K;Histone H2B type 1-L;Histone H2B type 2-E;Histone H2B type 1-B;Histone H2B type 1-O;Histone H2B type 1-J	HIST1H2BM;HIST1H2BN;HIST1H2BH;HIST2H2BF;HIST1H2BC;HIST1H2BD;H2BFS;HIST1H2BK;HIST1H2BL;HIST2H2BE;HIST1H2BB;HIST1H2BO;HIST1H2BJ	-	-	-	-	0.5546	0.314076	28.5618	28.0935	28.3401	27.2861	28.1683	27.8772
O60888-3;O60888;O60888-2	O60888-3;O60888;O60888-2	Protein CutA	CUTA	-	-	-	YES	-0.0416933	0.865747	29.6533	29.3359	29.9015	29.6713	29.6518	29.6928
O75083;O75083-3	O75083;O75083-3	WD repeat-containing protein 1	WDR1	-	-	-	YES	-0.228663	0.334817	29.2913	28.806	28.7808	29.3222	29.1964	29.0456
O75223;O75223-3;O75223-2;O75223-4	O75223;O75223-3;O75223-2;O75223-4	Gamma-glutamylcyclotransferase	GGCT	-	-	-	YES	-0.787837	0.023096	26.0433	25.8132	26.2513	26.3229	27.5909	26.5575
O75312	O75312	Zinc finger protein ZPR1	ZPR1	-	-	-	-	-0.170753	0.587899	25.5146	25.1408	25.5337	25.5978	25.7141	25.3895
O75347;O75347-2	O75347;O75347-2	Tubulin-specific chaperone A	TBCA	-	-	-	-	0.05162	0.848002	28.5012	27.9491	28.5933	28.0288	28.4441	28.4159
O75369-8	O75369-8	Filamin-B	FLNB	-	-	-	YES	-0.101063	0.653407	30.3432	30.0861	30.2293	30.448	30.2613	30.2526
O75506	O75506	Heat shock factor-binding protein 1	HSBP1	-	-	-	-	-0.58536	0.135745	25.5453	24.5824	25.5279	26.0854	25.6752	25.6511
O75531	O75531	Barrier-to-autointegration factor;Barrier-to-autointegration factor, N-terminally processed	BANF1	-	-	-	-	-0.595577	0.39251	25.8714	25.514	26.6443	26.8569	26.4182	26.5415
O75534-2;O75534;O75534-3;O75534-4	O75534-2;O75534;O75534-3;O75534-4	Cold shock domain-containing protein E1	CSDE1	-	-	-	-	0.0840167	0.847504	25.4292	25.2571	25.4025	24.9839	25.5478	25.3051
O75688-4;O75688-2;O75688;O75688-3;P35813-2;O75688-5;P35813;P35813-3	O75688-4;O75688-2;O75688;O75688-3;P35813-2;O75688-5;P35813;P35813-3	Protein phosphatase 1B;Protein phosphatase 1A	PPM1B;PPM1A	-	-	-	-	-0.20961	0.424528	24.0831	24.1154	24.1619	24.2069	24.4433	24.3391
O75821	O75821	Eukaryotic translation initiation factor 3 subunit G	EIF3G	-	-	-	-	-0.27246	0.388291	26.3305	26.1686	26.0706	26.3361	26.6889	26.3622
O75822-3;O75822;O75822-2	O75822-3;O75822;O75822-2	Eukaryotic translation initiation factor 3 subunit J	EIF3J	-	-	-	-	-0.20002	0.786393	26.3439	25.7125	26.4367	26.1714	26.5466	26.3752
O75874	O75874	Isocitrate dehydrogenase [NADP] cytoplasmic	IDH1	-	-	-	YES	-0.346983	0.647047	24.6219	23.6826	23.8335	24.458	25.2064	23.5146
O94760;O94760-2	O94760	N(G),N(G)-dimethylarginine dimethylaminohydrolase 1	DDAH1	-	-	-	YES	-0.252677	0.557797	27.1898	26.9579	26.9651	27.0286	27.1476	27.6946
O94907;Q9UBU2	O94907	Dickkopf-related protein 1	DKK1	-	-	-	-	0.40268	0.459869	28.9315	29.4564	29.3474	28.0522	28.8428	29.6322
O94985-2	O94985-2	Calsyntenin-1;Soluble Alc-alpha;CTF1-alpha	CLSTN1	-	-	-	-	-0.21324	0.386167	31.5543	31.885	31.8715	31.904	31.8806	32.1658
O95336	O95336	6-phosphogluconolactonase	PGLS	-	-	-	YES	0.260937	0.68584	27.6313	27.3687	27.4558	27.5139	27.488	26.6712
O95394;O95394-4;O95394-3	O95394;O95394-4;O95394-3	Phosphoacetylglucosamine mutase	PGM3	-	-	-	-	-0.511867	0.44063	26.0308	25.5101	23.7017	25.8449	25.3052	25.6281
O95433;O95433-2	O95433;O95433-2	Activator of 90 kDa heat shock protein ATPase homolog 1	AHSA1	-	-	-	YES	-0.109757	0.669162	26.6053	26.2479	26.6237	26.8779	26.4676	26.4605
O95757	O95757	Heat shock 70 kDa protein 4L	HSPA4L	-	-	-	-	0.238777	0.524722	25.8443	25.5163	25.831	25.6565	25.6712	25.1477
O95777	O95777	U6 snRNA-associated Sm-like protein LSm8	LSM8	-	-	-	-	-0.21765	0.414558	26.1812	25.6696	26.0977	26.3405	26.1283	26.1327
O95817	O95817	BAG family molecular chaperone regulator 3	BAG3	-	-	-	-	0.0994067	0.849174	25.4742	24.8944	24.9719	23.9249	25.6473	25.4702
P00338;P00338-3;P00338-5;P00338-2;P00338-4;Q6ZMR3	P00338;P00338-3;P00338-5;P00338-2;P00338-4	L-lactate dehydrogenase A chain	LDHA	-	-	-	YES	0.22005	0.706248	31.7175	31.5536	31.1962	31.7337	31.3398	30.7337
P00390-5;P00390-4;P00390-2;P00390-3;P00390	P00390-5;P00390-4;P00390-2;P00390-3;P00390	Glutathione reductase, mitochondrial	GSR	-	-	-	YES	0.335807	0.320569	24.1894	24.704	24.1514	23.872	24.43	23.7354
P00441	P00441	Superoxide dismutase [Cu-Zn]	SOD1	-	-	-	YES	0.88836	0.204999	26.5833	26.2802	26.5112	26.3984	23.5056	26.8057
P00491	P00491	Purine nucleoside phosphorylase	PNP	-	-	-	YES	-0.04915	0.952581	28.2582	28.199	27.4334	28.4098	28.1571	27.4711
P00492	P00492	Hypoxanthine-guanine phosphoribosyltransferase	HPRT1	-	-	-	YES	0.0194733	0.954477	27.648	27.3606	27.3456	27.9432	27.3094	27.0432
P00505-2;P00505	P00505-2;P00505	Aspartate aminotransferase, mitochondrial	GOT2	-	-	-	YES	0.207073	0.64754	27.2025	27.2037	27.2727	27.2415	26.9847	26.8315
P00558;P00558-2;P07205	P00558;P00558-2	Phosphoglycerate kinase 1	PGK1	-	-	-	YES	0.151623	0.579598	30.111	30.198	30.4334	30.1298	29.9411	30.2166
P01033	P01033	Metalloproteinase inhibitor 1	TIMP1	YES	Matrisome-associated	ECM Regulators	YES	-0.1598	0.770164	29.1022	29.0988	28.9955	29.575	29.1918	28.9092
P01040	P01040	Cystatin-A;Cystatin-A, N-terminally processed	CSTA	YES	Matrisome-associated	ECM Regulators	-	-0.66177	0.412319	25.925	26.4459	26.4818	26.3334	27.4403	27.0644
P01892;P10316;P30459;P01891;P10314;P30453;P16190;P16189;P30512;P30457;P30456;P30450;P18462;Q09160	P01892;P10316;P30459;P01891	HLA class I histocompatibility antigen, A-2 alpha chain;HLA class I histocompatibility antigen, A-69 alpha chain;HLA class I histocompatibility antigen, A-74 alpha chain;HLA class I histocompatibility antigen, A-68 alpha chain	HLA-A	-	-	-	-	-0.37258	0.534474	30.1043	29.7068	30.3239	30.2137	30.3792	30.6598
P02452;CON__Q862S4	P02452	Collagen alpha-1(I) chain	COL1A1	YES	Core matrisome	Collagens	-	1.15565	0.0800598	25.839	27.4529	24.9334	25.0289	24.9809	24.7486
P02545;P02545-6;P02545-3;P02545-5	P02545;P02545-6;P02545-3;P02545-5	Prelamin-A/C;Lamin-A/C	LMNA	-	-	-	-	0.0718867	0.747067	31.5792	31.2483	31.4395	31.2085	31.3188	31.524
P02751-17;P02751-3;P02751;P02751-6;P02751-5;P02751-10;P02751-9;P02751-14;P02751-8;P02751-7;P02751-15;P02751-13;P02751-11;P02751-4;P02751-12;P02751-16;P02751-2	P02751-17;P02751-3;P02751;P02751-6;P02751-5;P02751-10;P02751-9;P02751-14;P02751-8;P02751-7;P02751-15;P02751-13;P02751-11;P02751-4;P02751-12	Fibronectin;Anastellin;Ugl-Y1;Ugl-Y2;Ugl-Y3	FN1	YES	Core matrisome	ECM Glycoproteins	YES	0.0677267	0.841507	32.2063	32.5773	32.2632	32.5015	32.3443	31.9978
P02786	P02786	Transferrin receptor protein 1;Transferrin receptor protein 1, serum form	TFRC	-	-	-	YES	-0.0806167	0.922414	26.9958	26.9259	26.8419	27.45	26.8913	26.6642
P02794	P02794	Ferritin heavy chain;Ferritin heavy chain, N-terminally processed	FTH1	-	-	-	YES	-0.400113	0.423418	28.7236	28.7922	29.3397	28.8089	29.3468	29.9002
P03956	P03956	Interstitial collagenase;22 kDa interstitial collagenase;27 kDa interstitial collagenase	MMP1	YES	Matrisome-associated	ECM Regulators	-	-0.0642967	0.926577	33.6204	33.6933	33.1243	33.6998	34.2862	32.645
P04040	P04040	Catalase	CAT	-	-	-	YES	-0.323253	0.269574	26.3246	26.3144	25.9611	26.281	26.8575	26.4314
P04075;P04075-2	P04075;P04075-2	Fructose-bisphosphate aldolase A	ALDOA	-	-	-	YES	-0.176187	0.508394	30.5279	30.2299	30.6872	30.5596	30.56	30.854
P04080	P04080	Cystatin-B	CSTB	YES	Matrisome-associated	ECM Regulators	YES	0.435503	0.349885	24.799	24.7746	25.233	23.2008	25.3614	24.938
P04114;REV__Q8IXS0	P04114	Apolipoprotein B-100;Apolipoprotein B-48	APOB	-	-	-	YES	0.323697	0.61243	26.1687	26.503	26.3895	26.2385	25.6436	26.208
P04179-4;P04179-2;P04179;P04179-3	P04179-4;P04179-2;P04179;P04179-3	Superoxide dismutase [Mn], mitochondrial	SOD2	-	-	-	YES	0.05763	0.868404	23.9259	24.8264	23.6172	24.0315	23.9363	24.2288
P04406;P04406-2;O14556	P04406;P04406-2	Glyceraldehyde-3-phosphate dehydrogenase	GAPDH	-	-	-	YES	-0.0932467	0.683615	30.2625	30.1775	30.1397	30.2939	30.693	29.8724
P04792	P04792	Heat shock protein beta-1	HSPB1	-	-	-	YES	-0.6052	0.318349	25.2382	26.2854	25.5367	26.9108	25.9403	26.0248
P05023-3;P05023-4;P05023;P05023-2;P13637;P13637-2;P13637-3;P50993;Q13733;P20648	P05023-3;P05023-4;P05023;P05023-2	Sodium/potassium-transporting ATPase subunit alpha-1	ATP1A1	-	-	-	YES	0.0447967	0.939773	25.7508	25.8258	25.6701	25.8182	25.7971	25.497
P05067-7;P05067-11;P05067-8;P05067-9;P05067;P05067-3;P05067-4;P05067-5;P05067-6;P05067-10;P05067-2	P05067-7;P05067-11;P05067-8;P05067-9;P05067;P05067-3;P05067-4;P05067-5;P05067-6;P05067-10	Amyloid beta A4 protein;N-APP;Soluble APP-alpha;Soluble APP-beta;C99;Beta-amyloid protein 42;Beta-amyloid protein 40;C83;P3(42);P3(40);C80;Gamma-secretase C-terminal fragment 59;Gamma-secretase C-terminal fragment 57;Gamma-secretase C-terminal fragment 50;C31	APP	-	-	-	YES	-0.31656	0.318829	32.4541	32.53	32.9354	32.5105	33.1066	33.2522
P05121;P05121-2	P05121;P05121-2	Plasminogen activator inhibitor 1	SERPINE1	YES	Matrisome-associated	ECM Regulators	YES	-0.05445	0.922534	32.3453	32.5094	32.9355	33.3395	32.6181	31.9959
P05198	P05198	Eukaryotic translation initiation factor 2 subunit 1	EIF2S1	-	-	-	YES	0.13329	0.58396	27.5939	27.3123	27.5617	27.3085	27.3736	27.386
P05386	P05386	60S acidic ribosomal protein P1	RPLP1	-	-	-	-	0.38167	0.766738	28.1642	27.4652	23.3892	24.2592	27.8491	25.7654
P05387	P05387	60S acidic ribosomal protein P2	RPLP2	-	-	-	YES	-0.0863567	0.756958	29.6482	29.2107	29.786	29.7173	29.4749	29.7117
P05388;P05388-2;Q8NHW5	P05388;P05388-2;Q8NHW5	60S acidic ribosomal protein P0;60S acidic ribosomal protein P0-like	RPLP0;RPLP0P6	-	-	-	-	0.0827667	0.795574	26.9648	26.3311	26.7715	27.2097	26.6094	26
P05455	P05455	Lupus La protein	SSB	-	-	-	-	-0.240213	0.519155	26.7881	25.612	26.4157	26.6694	26.6482	26.2189
P05783;CON__H-INV:HIT000015463	P05783	Keratin, type I cytoskeletal 18	KRT18	-	-	-	YES	0.10181	0.758206	30.7173	30.5605	30.3924	30.2713	30.6125	30.481
P06280	P06280	Alpha-galactosidase A	GLA	-	-	-	YES	0.148933	0.618439	26.8793	26.3068	26.7664	26.6538	26.8416	26.0104
P06396-2;P06396-4;P06396-3;P06396	P06396-2;P06396-4;P06396-3;P06396	Gelsolin	GSN	-	-	-	YES	0.33713	0.434462	27.5749	28.679	28.5449	27.5004	27.5938	28.6932
P06454-2;P06454	P06454-2;P06454	Prothymosin alpha;Prothymosin alpha, N-terminally processed;Thymosin alpha-1	PTMA	-	-	-	-	0.19659	0.767415	30.6006	30.9578	31.4774	29.1862	31.3333	31.9265
P06576	P06576	ATP synthase subunit beta, mitochondrial	ATP5B	-	-	-	-	-0.17988	0.543521	28.2856	28.5189	28.2835	28.4181	28.5738	28.6357
P06703	P06703	Protein S100-A6	S100A6	YES	Matrisome-associated	Secreted Factors	YES	-0.50874	0.510766	31.3764	31.313	31.3651	31.4904	31.8259	32.2645
P06733;P06733-2;P13929-3;P13929-2;P13929	P06733;P06733-2	Alpha-enolase	ENO1	-	-	-	YES	-0.0624133	0.76629	32.5372	32.0069	32.447	32.4859	32.3406	32.3519
P06744;P06744-2;CON__Q3ZBD7;Q8N196	P06744;P06744-2	Glucose-6-phosphate isomerase	GPI	-	-	-	YES	0.136383	0.664697	28.7136	28.6552	28.6013	28.9461	28.472	28.1429
P06748-2;P06748;P06748-3	P06748-2;P06748;P06748-3	Nucleophosmin	NPM1	-	-	-	-	-0.183937	0.522373	32.0281	31.3612	31.8071	31.8766	31.8291	32.0425
P06753-2;P06753-3;P06753-6;P06753-5;P06753-4;P06753-7	P06753-2;P06753-3;P06753-6;P06753-5;P06753-4	Tropomyosin alpha-3 chain	TPM3	-	-	-	YES	-0.156163	0.56941	31.5051	30.9358	31.4405	31.1282	31.3602	31.8615
P06865;P06865-2	P06865	Beta-hexosaminidase subunit alpha	HEXA	-	-	-	YES	-0.3277	0.47263	27.6115	27.5338	27.544	28.1503	27.9563	27.5657
P07237	P07237	Protein disulfide-isomerase	P4HB	-	-	-	YES	-0.18546	0.417185	29.8836	29.5822	29.832	29.9241	29.6571	30.273
P07339	P07339	Cathepsin D;Cathepsin D light chain;Cathepsin D heavy chain	CTSD	YES	Matrisome-associated	ECM Regulators	YES	-0.12804	0.615496	29.8162	30.0196	30.3146	30.2431	30.3404	29.951
P07355;P07355-2;A6NMY6	P07355;P07355-2;A6NMY6	Annexin A2;Putative annexin A2-like protein	ANXA2;ANXA2P2	-	-	-	-	0.0715567	0.860795	29.1993	29.124	28.4081	29.3308	29.1806	28.0053
P07437;A6NNZ2	P07437	Tubulin beta chain	TUBB	-	-	-	YES	-0.00414	0.985914	31.3887	30.6603	30.8845	31.1419	30.9655	30.8385
P07602;P07602-2;P07602-3	P07602;P07602-2;P07602-3	Prosaposin;Saposin-A;Saposin-B-Val;Saposin-B;Saposin-C;Saposin-D	PSAP	-	-	-	YES	-0.301397	0.546083	27.8725	27.5603	27.9564	28.3102	28.1091	27.8742
P07686	P07686	Beta-hexosaminidase subunit beta;Beta-hexosaminidase subunit beta chain B;Beta-hexosaminidase subunit beta chain A	HEXB	-	-	-	YES	-0.43005	0.171084	28.9891	29.1067	29.1584	29.6841	29.5472	29.313
P07711	P07711	Cathepsin L1;Cathepsin L1 heavy chain;Cathepsin L1 light chain	CTSL	-	-	-	YES	-0.069	0.778221	27.943	28.1562	27.9891	28.0301	27.9323	28.3329
P07737;CON__P02584	P07737	Profilin-1	PFN1	-	-	-	YES	0.14535	0.698371	29.151	28.8071	29.4487	29.3666	29.1227	28.4814
P07741;P07741-2	P07741;P07741-2	Adenine phosphoribosyltransferase	APRT	-	-	-	YES	0.1748	0.752577	24.7082	24.7095	24.2017	24.5374	24.4874	24.0702
P07900;P07900-2;Q14568;Q58FG0;Q58FG1	P07900;P07900-2	Heat shock protein HSP 90-alpha	HSP90AA1	-	-	-	YES	-0.104743	0.671118	31.0846	30.7078	31.1357	31.0083	30.9939	31.2402
P07910-2;P07910-4;P07910;P07910-3;P0DMR1;O60812;B7ZW38;B2RXH8	P07910-2;P07910-4;P07910;P07910-3	Heterogeneous nuclear ribonucleoproteins C1/C2	HNRNPC	-	-	-	YES	-0.111447	0.792468	28.2265	27.4856	27.3712	27.9913	28.0556	27.3707
P07942	P07942	Laminin subunit beta-1	LAMB1	YES	Core matrisome	ECM Glycoproteins	YES	0.0145233	0.971662	26.9536	27.5824	27.511	27.2266	27.2759	27.5009
P07996;P07996-2	P07996;P07996-2	Thrombospondin-1	THBS1	YES	Core matrisome	ECM Glycoproteins	YES	0.0507433	0.81666	34.0434	34.4695	34.163	34.2489	34.1773	34.0974
P08123	P08123	Collagen alpha-2(I) chain	COL1A2	YES	Core matrisome	Collagens	YES	-0.0393167	0.946193	24.2254	24.1133	25.3943	24.7365	23.9366	25.1779
P08133;P08133-2	P08133;P08133-2	Annexin A6	ANXA6	YES	Matrisome-associated	ECM-affiliated Proteins	YES	-0.128333	0.732811	25.9527	25.8413	25.7643	26.0427	26.2602	25.6405
P08195-3;P08195;P08195-4	P08195-3;P08195;P08195-4	4F2 cell-surface antigen heavy chain	SLC3A2	-	-	-	YES	-0.0977567	0.890984	27.4386	27.397	27.3576	27.5359	27.607	27.3435
P08238;Q58FF7;Q92538-3;Q92538-2;Q92538	P08238	Heat shock protein HSP 90-beta	HSP90AB1	-	-	-	YES	-0.125767	0.620287	33.6208	33.0389	33.5165	33.4519	33.4954	33.6062
P08603;P08603-2;Q03591	P08603;P08603-2	Complement factor H	CFH	-	-	-	YES	-0.23914	0.608699	26.8876	27.7511	27.8021	27.5218	27.6375	27.999
P08621-2;P08621;P08621-3;P08621-4	P08621-2;P08621;P08621-3	U1 small nuclear ribonucleoprotein 70 kDa	SNRNP70	-	-	-	-	0.13929	0.767972	26.8468	26.753	26.3278	26.11	26.8145	26.5853
P08758	P08758	Annexin A5	ANXA5	YES	Matrisome-associated	ECM-affiliated Proteins	YES	0.06289	0.899921	27.8881	28.2808	27.4069	27.9049	27.9693	27.5129
P08865	P08865	40S ribosomal protein SA	RPSA	-	-	-	YES	-0.07643	0.816365	29.1207	28.8617	28.7039	29.1107	29.0505	28.7545
P09104-2;P09104	P09104-2;P09104	Gamma-enolase	ENO2	-	-	-	YES	-0.0646967	0.885641	26.0469	25.709	25.5117	25.706	25.7293	26.0265
P09382	P09382	Galectin-1	LGALS1	YES	Matrisome-associated	ECM-affiliated Proteins	YES	0.16028	0.632583	29.8262	29.1505	29.6111	29.7473	29.4304	28.9293
P09429;B2RPK0	P09429	High mobility group protein B1	HMGB1	-	-	-	-	-0.245443	0.507035	26.7749	26.55	26.4539	27.5549	26.5023	26.4579
P09493-3;P09493-4;P09493-10;P09493-9;P09493-8;P09493	P09493-3;P09493-4;P09493-10;P09493-9;P09493-8;P09493	Tropomyosin alpha-1 chain	TPM1	-	-	-	-	-0.935553	0.301171	26.8145	24.4959	26.5904	26.8226	26.917	26.9677
P09493-5	P09493-5	Tropomyosin alpha-1 chain	TPM1	-	-	-	-	-0.741017	0.182787	27.2944	24.6498	27.019	26.6294	27.0616	27.4953
P09496-2;P09496-4;P09496-3;P09496;P09496-5	P09496-2;P09496-4;P09496-3;P09496;P09496-5	Clathrin light chain A	CLTA	-	-	-	-	-0.35717	0.166903	27.6774	26.9769	27.019	27.5952	27.5412	27.6085
P09497-2;P09497	P09497-2;P09497	Clathrin light chain B	CLTB	-	-	-	-	0.15768	0.708152	25.8461	25.3597	25.7258	25.8288	25.6699	24.9599
P09651-3;P09651-2;P09651;Q32P51	P09651-3;P09651-2;P09651;Q32P51	Heterogeneous nuclear ribonucleoprotein A1;Heterogeneous nuclear ribonucleoprotein A1, N-terminally processed;Heterogeneous nuclear ribonucleoprotein A1-like 2	HNRNPA1;HNRNPA1L2	-	-	-	-	-0.09199	0.803536	29.321	28.3951	28.8221	28.9569	29.0934	28.7638
P09972	P09972	Fructose-bisphosphate aldolase C	ALDOC	-	-	-	YES	0.227077	0.582044	25.7276	24.8454	25.1981	24.6127	25.1886	25.2885
P62987;P62979;P0CG47;P0CG48	P62987;P62979;P0CG47;P0CG48	Ubiquitin-60S ribosomal protein L40;Ubiquitin;60S ribosomal protein L40;Ubiquitin-40S ribosomal protein S27a;Ubiquitin;40S ribosomal protein S27a;Polyubiquitin-B;Ubiquitin;Polyubiquitin-C;Ubiquitin	UBA52;RPS27A;UBB;UBC	-	-	-	-	-0.06492	0.839889	29.1914	29.0327	29.3033	29.1483	29.4745	29.0994
P0DMV9;P0DMV8;P0DMV8-2	P0DMV9;P0DMV8;P0DMV8-2	Heat shock 70 kDa protein 1B;Heat shock 70 kDa protein 1A	HSPA1B;HSPA1A	-	-	-	-	-0.0565867	0.790212	28.9734	28.5495	29.0824	29.0446	28.8127	28.9177
P0DP25;P0DP24;P0DP23;P27482;P02585	P0DP25;P0DP24;P0DP23			-	-	-	-	-0.0737467	0.828481	31.8159	31.0818	31.5736	31.6619	31.5057	31.5251
P10253	P10253	Lysosomal alpha-glucosidase;76 kDa lysosomal alpha-glucosidase;70 kDa lysosomal alpha-glucosidase	GAA	-	-	-	YES	-0.433817	0.435828	25.7357	25.6046	25.402	26.2508	26.1334	25.6595
P10586-2;P10586	P10586-2;P10586	Receptor-type tyrosine-protein phosphatase F	PTPRF	-	-	-	YES	0.00376667	0.989208	27.9119	28.323	28.3539	28.0035	28.2939	28.28
P10599;P10599-2	P10599;P10599-2	Thioredoxin	TXN	-	-	-	YES	0.0508567	0.877027	29.2681	29.6569	29.6995	29.0623	29.7361	29.6735
P10644;P10644-2	P10644;P10644-2	cAMP-dependent protein kinase type I-alpha regulatory subunit;cAMP-dependent protein kinase type I-alpha regulatory subunit, N-terminally processed	PRKAR1A	-	-	-	-	0.0929967	0.756213	26.1048	25.66	25.6949	25.7285	26.1609	25.2913
P10809;P10809-2	P10809	60 kDa heat shock protein, mitochondrial	HSPD1	-	-	-	YES	-0.0612033	0.825932	28.8935	28.8781	28.8917	28.8805	28.8538	29.1126
P10909-4;P10909;P10909-5;P10909-2;P10909-3	P10909-4;P10909;P10909-5;P10909-2;P10909-3	Clusterin;Clusterin beta chain;Clusterin alpha chain	CLU	-	-	-	YES	0.0856233	0.76471	29.5088	29.5537	30.2685	29.5703	29.6253	29.8786
P11021	P11021	78 kDa glucose-regulated protein	HSPA5	-	-	-	YES	-0.10307	0.596225	30.57	30.1775	30.6939	30.5849	30.5421	30.6235
P11047	P11047	Laminin subunit gamma-1	LAMC1	YES	Core matrisome	ECM Glycoproteins	YES	-0.317767	0.354374	28.7046	28.8159	28.6059	29.0096	29.3208	28.7493
P11142;P11142-2;P54652	P11142;P11142-2	Heat shock cognate 71 kDa protein	HSPA8	-	-	-	YES	-0.02293	0.91206	32.6709	31.9921	32.4774	32.4582	32.3428	32.4083
P11216;P11217-2;P11217	P11216	Glycogen phosphorylase, brain form	PYGB	-	-	-	YES	-0.122653	0.819931	26.8881	27.1328	26.251	27.4004	27.0105	26.229
P11413;P11413-2;P11413-3	P11413;P11413-2;P11413-3	Glucose-6-phosphate 1-dehydrogenase	G6PD	-	-	-	YES	0.190937	0.515161	27.8833	27.7892	27.3678	27.9128	27.6273	26.9274
P11586;Q6UB35	P11586	C-1-tetrahydrofolate synthase, cytoplasmic;Methylenetetrahydrofolate dehydrogenase;Methenyltetrahydrofolate cyclohydrolase;Formyltetrahydrofolate synthetase;C-1-tetrahydrofolate synthase, cytoplasmic, N-terminally processed	MTHFD1	-	-	-	YES	-0.36625	0.362205	25.5421	25.7467	24.5757	25.9062	25.7092	25.3478
P11717	P11717	Cation-independent mannose-6-phosphate receptor	IGF2R	-	-	-	YES	0.0755233	0.842708	27.0991	27.449	27.3478	27.01	27.2632	27.3961
P11940-2;P11940;Q9H361;Q13310-2;Q13310;Q13310-3;Q4VXU2;Q4VXU2-2;Q5JQF8;Q96DU9-2;Q96DU9	P11940-2;P11940;Q9H361	Polyadenylate-binding protein 1;Polyadenylate-binding protein 3	PABPC1;PABPC3	-	-	-	-	0.00153667	0.996541	28.6234	28.2065	28.5069	28.643	28.4789	28.2103
P12004	P12004	Proliferating cell nuclear antigen	PCNA	-	-	-	YES	-0.138687	0.647308	27.9622	27.5461	27.8812	27.6126	28.0391	28.1538
P12081-4;P12081;P12081-3;P12081-2	P12081-4;P12081;P12081-3;P12081-2	Histidine--tRNA ligase, cytoplasmic	HARS	-	-	-	-	0.00118333	0.998516	27.6315	27.346	27.4908	27.7607	27.4109	27.2933
P12109	P12109	Collagen alpha-1(VI) chain	COL6A1	YES	Core matrisome	Collagens	YES	-0.736267	0.018267	29.342	29.4739	29.7262	30.0441	30.2574	30.4493
P12268;P20839-2;P20839-4;P20839;P20839-3;P20839-7;P20839-5;P20839-6	P12268	Inosine-5-monophosphate dehydrogenase 2	IMPDH2	-	-	-	YES	-0.0522433	0.830873	27.1294	26.6378	26.7689	27.0244	26.8634	26.805
P12270;P12270-2	P12270;P12270-2	Nucleoprotein TPR	TPR	-	-	-	-	0.158243	0.706516	25.7677	25.3618	25.5846	25.5421	25.6082	25.089
P12814;P12814-3;P12814-2;P12814-4;P35609-2;P35609	P12814;P12814-3;P12814-2;P12814-4	Alpha-actinin-1	ACTN1	-	-	-	YES	0.172307	0.479482	31.1404	30.5251	30.8802	30.8491	30.5131	30.6665
P12956;P12956-2	P12956;P12956-2	X-ray repair cross-complementing protein 6	XRCC6	-	-	-	-	0.00714	0.986102	28.5812	28.3829	28.3933	28.5217	28.5402	28.2741
P13010	P13010	X-ray repair cross-complementing protein 5	XRCC5	-	-	-	-	-0.01971	0.964848	28.5522	28.3119	28.5954	28.7676	28.4371	28.314
P13489	P13489	Ribonuclease inhibitor	RNH1	-	-	-	YES	0.0102733	0.981852	28.3922	28.029	28.3354	28.1457	28.2108	28.3693
P13639	P13639	Elongation factor 2	EEF2	-	-	-	YES	0.188757	0.447016	30.2537	29.9699	30.1687	30.205	29.872	29.7491
P13667	P13667	Protein disulfide-isomerase A4	PDIA4	-	-	-	-	-0.01687	0.954013	28.0355	27.6677	28.1158	27.8701	27.8614	28.1381
P13693;P13693-2;Q56UQ5	P13693;P13693-2	Translationally-controlled tumor protein	TPT1	-	-	-	YES	-0.302293	0.333626	27.9637	27.633	28.1211	27.9988	28.127	28.4989
P13798	P13798	Acylamino-acid-releasing enzyme	APEH	-	-	-	YES	0.07364	0.88315	25.2026	25.1337	24.1431	25.3683	24.263	24.6272
P13861-2;P13861	P13861-2;P13861	cAMP-dependent protein kinase type II-alpha regulatory subunit	PRKAR2A	-	-	-	YES	-0.0100233	0.971862	31.2907	31.1388	30.8547	31.2384	31.0876	30.9882
P14314-2;P14314	P14314-2;P14314	Glucosidase 2 subunit beta	PRKCSH	-	-	-	-	-0.18277	0.494012	29.3122	29.109	29.5066	29.4103	29.2184	29.8475
P14324-2;P14324	P14324-2;P14324	Farnesyl pyrophosphate synthase	FDPS	-	-	-	-	0.09595	0.730096	28.1324	27.3461	27.7681	27.7312	27.8146	27.4129
P14618;P14618-2;P14618-3;P30613-2;P30613	P14618;P14618-2;P14618-3	Pyruvate kinase PKM	PKM	-	-	-	YES	0.0421	0.871126	31.8444	31.2575	31.6027	31.7381	31.5519	31.2883
P14625;Q58FF3	P14625	Endoplasmin	HSP90B1	-	-	-	YES	-0.0335033	0.86758	30.5914	30.3988	30.7565	30.6059	30.4355	30.8059
P14866;P14866-2	P14866;P14866-2	Heterogeneous nuclear ribonucleoprotein L	HNRNPL	-	-	-	YES	-0.321847	0.570561	27.4544	27.1948	27.0831	27.3152	27.7461	27.6365
P14868;P14868-2	P14868;P14868-2	Aspartate--tRNA ligase, cytoplasmic	DARS	-	-	-	YES	0.270393	0.479737	27.1395	26.4313	26.3246	26.2735	26.5019	26.3088
P15151-3;P15151-2;P15151-4;P15151	P15151-3;P15151-2;P15151-4;P15151	Poliovirus receptor	PVR	-	-	-	-	-0.00741667	0.99216	28.5627	29.2803	30.0308	28.5174	29.0487	30.33
P15170-2;P15170-3;P15170;Q8IYD1	P15170-2;P15170-3;P15170;Q8IYD1	Eukaryotic peptide chain release factor GTP-binding subunit ERF3A;Eukaryotic peptide chain release factor GTP-binding subunit ERF3B	GSPT1;GSPT2	-	-	-	-	0.695017	0.300688	25.9947	25.9812	25.6849	24.0014	25.6984	25.8759
P15291-2;P15291	P15291-2;P15291	Beta-1,4-galactosyltransferase 1;Lactose synthase A protein;N-acetyllactosamine synthase;Beta-N-acetylglucosaminylglycopeptide beta-1,4-galactosyltransferase;Beta-N-acetylglucosaminyl-glycolipid beta-1,4-galactosyltransferase;Processed beta-1,4-galactosyltransferase 1	B4GALT1	-	-	-	YES	-0.19716	0.752031	26.2121	26.91	26.2643	26.9774	26.4827	26.5177
P15311	P15311	Ezrin	EZR	-	-	-	YES	0.0189567	0.943994	28.8082	28.5648	28.8789	28.5242	28.7648	28.906
P15374	P15374	Ubiquitin carboxyl-terminal hydrolase isozyme L3	UCHL3	-	-	-	-	-0.125	0.839753	28.3772	27.4318	28.0362	28.0144	28.0698	28.136
P15586;P15586-2	P15586;P15586-2	N-acetylglucosamine-6-sulfatase	GNS	-	-	-	YES	-0.276397	0.212046	27.0986	27.2285	27.1297	27.4425	27.5745	27.2689
P15880	P15880	40S ribosomal protein S2	RPS2	-	-	-	YES	0.136993	0.688761	24.8322	24.6104	24.7479	25.1899	24.6226	23.9671
P15924;P15924-3;P15924-2	P15924;P15924-3;P15924-2	Desmoplakin	DSP	-	-	-	YES	-1.65765	0.242103	24.5881	25.5644	24.7279	25.5987	30.1636	24.091
P16035	P16035	Metalloproteinase inhibitor 2	TIMP2	YES	Matrisome-associated	ECM Regulators	-	-0.216977	0.638814	29.4238	29.4359	29.9031	29.6702	30.042	29.7015
P16070-18;P16070-12;P16070-14;P16070-13;P16070-11;P16070-10;P16070-16;P16070-8;P16070-17;P16070-6;P16070-4;P16070-3;P16070-7;P16070-5;P16070;P16070-15;P16070-9;P16070-19	P16070-18;P16070-12;P16070-14;P16070-13;P16070-11;P16070-10;P16070-16;P16070-8;P16070-17;P16070-6;P16070-4;P16070-3;P16070-7;P16070-5;P16070;P16070-15;P16070-9	CD44 antigen	CD44	-	-	-	YES	-0.390657	0.182468	30.6238	30.7096	30.3307	30.7195	30.8946	31.2221
P16152;P16152-2	P16152;P16152-2	Carbonyl reductase [NADPH] 1	CBR1	-	-	-	YES	-0.0487467	0.89156	25.8261	25.6193	25.5051	25.8816	25.8903	25.3249
P16403	P16403	Histone H1.2	HIST1H1C	-	-	-	-	0.301593	0.464484	25.4264	26.7331	25.9244	25.8973	25.6752	25.6066
P16870-2;P16870	P16870-2;P16870	Carboxypeptidase E	CPE	-	-	-	YES	-0.09582	0.775628	26.4643	26.8112	26.8609	26.5307	26.8227	27.0703
P16949;P16949-2	P16949;P16949-2	Stathmin	STMN1	-	-	-	YES	-0.0841633	0.763815	28.8235	28.2394	28.0249	28.4919	28.5108	28.3375
P17174;P17174-2	P17174;P17174-2	Aspartate aminotransferase, cytoplasmic	GOT1	-	-	-	YES	0.134973	0.54778	28.9384	28.7574	28.5335	28.7187	28.6801	28.4255
P17931	P17931	Galectin-3	LGALS3	YES	Matrisome-associated	ECM-affiliated Proteins	YES	-0.0174167	0.9724	25.5971	25.5084	25.6681	26.076	25.4377	25.3122
P17936;P17936-2	P17936;P17936-2	Insulin-like growth factor-binding protein 3	IGFBP3	YES	Core matrisome	ECM Glycoproteins	-	0.0141333	0.969745	29.6899	29.8146	30.046	29.8181	29.8267	29.8632
P17980	P17980	26S protease regulatory subunit 6A	PSMC3	-	-	-	-	0.0300833	0.900203	27.1846	26.8266	27.0751	26.9857	27.0735	26.937
P17987	P17987	T-complex protein 1 subunit alpha	TCP1	-	-	-	YES	0.0790767	0.7338	29.1511	28.661	29.094	28.8468	28.904	28.918
P18085	P18085	ADP-ribosylation factor 4	ARF4	-	-	-	YES	0.280127	0.634007	26.0964	25.7614	24.9444	25.5124	25.3406	25.1089
P18206-2;P18206;P18206-3	P18206-2;P18206	Vinculin	VCL	-	-	-	YES	0.131713	0.510775	29.6614	29.6074	29.8454	29.7041	29.4558	29.5591
P18669;P15259;Q8N0Y7	P18669;P15259	Phosphoglycerate mutase 1;Phosphoglycerate mutase 2	PGAM1;PGAM2	-	-	-	-	0.13707	0.582208	30.6078	30.4104	30.3698	30.0305	30.4428	30.5035
P19105;O14950;P24844;P24844-2	P19105;O14950	Myosin regulatory light chain 12A;Myosin regulatory light chain 12B	MYL12A;MYL12B	-	-	-	-	-0.1271	0.612399	28.5527	27.7619	28.3602	28.5605	28.279	28.2166
P19338	P19338	Nucleolin	NCL	-	-	-	YES	-0.0903533	0.66539	31.5833	31.0566	31.4475	31.4848	31.396	31.4776
P19623	P19623	Spermidine synthase	SRM	-	-	-	-	0.151	0.480693	26.8585	26.5999	26.5799	26.3958	26.6728	26.5167
P20290-2;P20290	P20290-2;P20290	Transcription factor BTF3	BTF3	-	-	-	-	0.0311833	0.959255	26.1759	25.98	25.2824	26.056	25.9348	25.354
P20618	P20618	Proteasome subunit beta type-1	PSMB1	-	-	-	YES	-0.14788	0.762097	26.6218	25.8926	26.3019	26.4593	26.5555	26.2452
P20700	P20700	Lamin-B1	LMNB1	-	-	-	-	0.0696033	0.801179	27.8888	27.1342	27.6288	27.4888	27.6237	27.3305
P20810-3;P20810-4;P20810-8;P20810-2;P20810;P20810-9;P20810-5;P20810-10;P20810-7;P20810-6	P20810-3;P20810-4;P20810-8;P20810-2;P20810;P20810-9;P20810-5;P20810-10;P20810-7;P20810-6	Calpastatin	CAST	-	-	-	-	-0.0847433	0.743595	26.7695	26.2933	26.812	26.7281	26.737	26.664
P20933	P20933	N(4)-(beta-N-acetylglucosaminyl)-L-asparaginase;Glycosylasparaginase alpha chain;Glycosylasparaginase beta chain	AGA	-	-	-	-	-0.734723	0.0294523	26.6918	26.5135	26.96	27.4063	27.3993	27.5638
P21281;P15313	P21281	V-type proton ATPase subunit B, brain isoform	ATP6V1B2	-	-	-	YES	-0.0693967	0.765379	26.115	25.8094	26.0263	26.3069	26.2746	25.5773
P21333-2;P21333	P21333-2;P21333	Filamin-A	FLNA	-	-	-	YES	0.08922	0.652838	31.745	31.4826	31.5596	31.6638	31.4646	31.3911
P22061;P22061-2	P22061;P22061-2	Protein-L-isoaspartate(D-aspartate) O-methyltransferase	PCMT1	-	-	-	YES	-0.186017	0.489942	27.5925	27.581	27.772	27.9992	27.7115	27.7929
P22102;P22102-2	P22102;P22102-2	Trifunctional purine biosynthetic protein adenosine-3;Phosphoribosylamine--glycine ligase;Phosphoribosylformylglycinamidine cyclo-ligase;Phosphoribosylglycinamide formyltransferase	GART	-	-	-	YES	0.174883	0.531605	27.0456	27.2316	26.791	26.7104	26.7914	27.0418
P22314-2;P22314	P22314-2;P22314	Ubiquitin-like modifier-activating enzyme 1	UBA1	-	-	-	YES	-0.04344	0.86775	28.3997	28.0202	27.9117	28.2821	28.374	27.8058
P22392-2;P22392;O60361	P22392-2;P22392;O60361	Nucleoside diphosphate kinase B;Putative nucleoside diphosphate kinase	NME2;NME2P1	-	-	-	-	0.344443	0.364093	30.0021	29.8742	29.5573	29.541	29.4705	29.3887
P22626	P22626	Heterogeneous nuclear ribonucleoproteins A2/B1	HNRNPA2B1	-	-	-	YES	0.00188667	0.994923	30.5336	30.0605	30.3198	30.1021	30.338	30.4681
P23246;P23246-2	P23246;P23246-2	Splicing factor, proline- and glutamine-rich	SFPQ	-	-	-	-	0.239737	0.410713	29.3068	28.8403	28.8172	28.7968	28.923	28.5253
P23396;P23396-2	P23396;P23396-2	40S ribosomal protein S3	RPS3	-	-	-	YES	-0.248223	0.612722	26.633	25.2649	26.2377	26.7838	26.6402	25.4563
P23526;P23526-2	P23526;P23526-2	Adenosylhomocysteinase	AHCY	-	-	-	YES	0.151983	0.52982	28.5539	28.3219	28.2951	28.3307	28.3631	28.0211
P23528	P23528	Cofilin-1	CFL1	-	-	-	YES	-0.237453	0.316501	30.9181	30.3526	30.9239	30.9337	31.0992	30.874
P23588;P23588-2	P23588;P23588-2	Eukaryotic translation initiation factor 4B	EIF4B	-	-	-	-	-0.0453933	0.91023	27.829	27.7955	28.0531	27.5201	28.1236	28.1703
P24534	P24534	Elongation factor 1-beta	EEF1B2	-	-	-	-	0.01414	0.971077	29.4154	28.4482	28.9769	29.3532	28.6121	28.8327
P24666;P24666-4;P24666-3;P24666-2	P24666;P24666-4;P24666-3;P24666-2	Low molecular weight phosphotyrosine protein phosphatase	ACP1	-	-	-	YES	-0.195613	0.632942	23.8664	23.7129	24.5737	24.2615	24.2391	24.2391
P24821;P24821-3;P24821-5;P24821-6	P24821;P24821-3;P24821-5;P24821-6	Tenascin	TNC	YES	Core matrisome	ECM Glycoproteins	-	0.164513	0.830039	30.5678	31.0788	30.6864	31.0312	30.6755	30.1328
P25205;P25205-2	P25205;P25205-2	DNA replication licensing factor MCM3	MCM3	-	-	-	-	-1.91566	0.116921	30.8046	30.3739	24.5949	30.6936	30.4428	30.3839
P25398	P25398	40S ribosomal protein S12	RPS12	-	-	-	-	0.02981	0.910372	29.0236	28.344	28.988	28.881	28.7765	28.6086
P25685;P25685-2	P25685;P25685-2	DnaJ homolog subfamily B member 1	DNAJB1	-	-	-	YES	0.232383	0.491767	25.8545	25.5734	25.4139	25.4158	25.63	25.0989
P25705;P25705-2;P25705-3	P25705;P25705-2;P25705-3	ATP synthase subunit alpha, mitochondrial	ATP5A1	-	-	-	-	-0.835077	0.277537	25.9648	26.6632	23.1293	26.0691	26.0965	26.097
P25786;P25786-2	P25786;P25786-2	Proteasome subunit alpha type-1	PSMA1	-	-	-	YES	-0.0992467	0.681677	27.0301	26.9458	27.0131	27.0867	27.1343	27.0658
P25787	P25787	Proteasome subunit alpha type-2	PSMA2	-	-	-	YES	-0.0644633	0.843428	26.2999	26.5486	25.938	26.6158	26.2375	26.1265
P25788-2;P25788	P25788-2;P25788	Proteasome subunit alpha type-3	PSMA3	-	-	-	YES	-0.0760967	0.703429	28.105	27.8591	28.1386	28.0346	28.1482	28.1482
P25789;P25789-2	P25789;P25789-2	Proteasome subunit alpha type-4	PSMA4	-	-	-	YES	0.0717967	0.851869	28.0182	27.6866	27.7521	27.9276	27.9394	27.3745
P26038	P26038	Moesin	MSN	-	-	-	YES	-0.0220467	0.942167	31.6255	31.5138	31.5059	31.5634	31.6421	31.5058
P26373;P26373-2	P26373;P26373-2	60S ribosomal protein L13	RPL13	-	-	-	-	0.05822	0.913186	26.0973	26.0473	27.0399	26.4802	25.8579	26.6717
P26583	P26583	High mobility group protein B2	HMGB2	-	-	-	-	-0.25128	0.608972	26.5146	26.4422	26.3685	26.8517	26.5842	26.6432
P26599;P26599-2;P26599-3	P26599;P26599-2;P26599-3	Polypyrimidine tract-binding protein 1	PTBP1	-	-	-	YES	0.139787	0.841206	25.946	24.689	24.8641	24.8953	25.5834	24.6011
P26639;P26639-2;Q9BW92-2;Q9BW92	P26639;P26639-2	Threonine--tRNA ligase, cytoplasmic	TARS	-	-	-	YES	-0.176393	0.485932	28.9056	28.2537	28.5137	28.894	28.8498	28.4583
P26640;P26640-2	P26640	Valine--tRNA ligase	VARS	-	-	-	-	-0.0228367	0.932916	25.654	25.6943	25.0425	25.5836	25.5891	25.2865
P26641;P26641-2	P26641;P26641-2	Elongation factor 1-gamma	EEF1G	-	-	-	YES	0.26263	0.698971	30.2347	29.8822	29.672	30.1901	29.8465	28.9645
P27348	P27348	14-3-3 protein theta	YWHAQ	-	-	-	YES	-0.0809367	0.746374	30.0227	29.2594	29.9389	29.7165	29.8384	29.909
P27708	P27708	CAD protein;Glutamine-dependent carbamoyl-phosphate synthase;Aspartate carbamoyltransferase;Dihydroorotase	CAD	-	-	-	YES	0.0976667	0.841446	27.6684	27.4069	27.1495	27.6178	27.5459	26.7681
P27797	P27797	Calreticulin	CALR	-	-	-	YES	0.0324067	0.881024	30.5017	29.996	30.5229	30.1419	30.1744	30.6072
P27816-6;P27816;P27816-2;P27816-5;P27816-7;P27816-4	P27816-6;P27816;P27816-2;P27816-5	Microtubule-associated protein 4	MAP4	-	-	-	-	-0.135703	0.524562	27.6438	27.3157	27.4316	27.5766	27.6985	27.5231
P28066;P28066-2	P28066;P28066-2	Proteasome subunit alpha type-5	PSMA5	-	-	-	YES	-0.0990167	0.683167	29.0929	28.3597	28.7154	28.9653	28.564	28.9358
P28070	P28070	Proteasome subunit beta type-4	PSMB4	-	-	-	YES	-0.0199333	0.972595	26.824	26.3837	26.2748	26.3623	26.6996	26.4804
P28072	P28072	Proteasome subunit beta type-6	PSMB6	-	-	-	YES	-0.103667	0.800365	28.8795	28.4193	28.6013	28.8303	28.6541	28.7265
P28482-2;P28482	P28482-2;P28482	Mitogen-activated protein kinase 1	MAPK1	-	-	-	-	-0.386507	0.355271	26.1923	26.1002	26.08	26.8022	26.8298	25.9
P28838-2;P28838	P28838-2;P28838	Cytosol aminopeptidase	LAP3	-	-	-	YES	0.0242233	0.928589	27.4938	27.2867	26.9956	27.5818	27.2286	26.8931
P29401;P29401-2	P29401;P29401-2	Transketolase	TKT	-	-	-	YES	0.06297	0.809934	29.5076	29.1757	29.2123	29.3925	29.2291	29.0851
P29508;P29508-2;P48594	P29508;P29508-2;P48594	Serpin B3;Serpin B4	SERPINB3;SERPINB4	-	-	-	-	-1.03336	0.330852	23.896	24.5305	25.0001	24.5181	28.0108	23.9977
P29692;P29692-2;P29692-4	P29692;P29692-2;P29692-4	Elongation factor 1-delta	EEF1D	-	-	-	-	-0.182347	0.616554	30.6139	29.9796	30.1069	30.321	30.3569	30.5696
P29966	P29966	Myristoylated alanine-rich C-kinase substrate	MARCKS	-	-	-	YES	-0.12287	0.754618	26.1648	25.5032	26.4862	25.5545	26.082	26.8864
P30040;P30040-2	P30040	Endoplasmic reticulum resident protein 29	ERP29	-	-	-	-	-0.130027	0.612177	27.8121	27.2127	28.069	27.8298	27.7657	27.8884
P30041	P30041	Peroxiredoxin-6	PRDX6	-	-	-	YES	0.11921	0.7835	28.7477	28.3756	28.4398	28.8185	28.4778	27.9091
P30044-2;P30044-3;P30044;P30044-4	P30044-2;P30044-3;P30044;P30044-4	Peroxiredoxin-5, mitochondrial	PRDX5	-	-	-	YES	0.344193	0.551292	26.4737	25.3565	25.4401	25.8608	25.5923	24.7846
P30048-2;P30048	P30048-2;P30048	Thioredoxin-dependent peroxide reductase, mitochondrial	PRDX3	-	-	-	-	-0.18298	0.606653	28.253	27.9451	28.0408	28.3701	28.1543	28.2633
P30050;P30050-2	P30050;P30050-2	60S ribosomal protein L12	RPL12	-	-	-	YES	-0.0347367	0.952893	25.9709	25.6396	25.6418	26.4319	25.654	25.2706
P30085;P30085-2	P30085;P30085-2	UMP-CMP kinase	CMPK1	-	-	-	YES	-1.13214	0.0698577	25.8479	25.5219	22.7463	25.6916	25.8278	25.9931
P30086	P30086	Phosphatidylethanolamine-binding protein 1;Hippocampal cholinergic neurostimulating peptide	PEBP1	-	-	-	YES	0.06212	0.853113	27.2138	26.8149	27.357	27.2224	27.1218	26.8552
P30101	P30101	Protein disulfide-isomerase A3	PDIA3	-	-	-	YES	-0.10594	0.6832	30.0017	29.6655	30.0189	29.9571	29.8232	30.2235
P30153;P30154-4;P30154;P30154-2;P30154-5;P30154-3	P30153	Serine/threonine-protein phosphatase 2A 65 kDa regulatory subunit A alpha isoform	PPP2R1A	-	-	-	YES	0.0584533	0.839471	29.1548	28.749	28.9152	29.0138	28.8603	28.7695
P30520	P30520	Adenylosuccinate synthetase isozyme 2	ADSS	-	-	-	YES	0.0555133	0.926865	26.9573	26.0004	26.6958	26.8976	26.5672	26.0221
P31150	P31150	Rab GDP dissociation inhibitor alpha	GDI1	-	-	-	-	-0.18449	0.4595	27.7979	27.4865	27.6223	27.9205	27.734	27.8056
P31153;P31153-2;Q00266	P31153;P31153-2	S-adenosylmethionine synthase isoform type-2	MAT2A	-	-	-	-	0.0879633	0.67736	28.5036	27.9643	28.1644	27.9785	28.2339	28.1561
P31431-2;P31431	P31431-2;P31431	Syndecan-4	SDC4	YES	Matrisome-associated	ECM-affiliated Proteins	YES	-0.371417	0.2623	28.4624	28.6584	29.0564	28.5164	29.1779	29.5971
P31939-2;P31939	P31939-2;P31939	Bifunctional purine biosynthesis protein PURH;Phosphoribosylaminoimidazolecarboxamide formyltransferase;IMP cyclohydrolase	ATIC	-	-	-	YES	0.105257	0.741251	27.7248	27.8692	27.8117	27.9465	27.5351	27.6082
P31942-3;P31942-2;P31942;P31942-4;P31942-6;P31942-5	P31942-3;P31942-2;P31942;P31942-4	Heterogeneous nuclear ribonucleoprotein H3	HNRNPH3	-	-	-	-	0.318617	0.328242	27.2874	26.7077	26.7113	26.4696	26.9056	26.3754
P31943	P31943	Heterogeneous nuclear ribonucleoprotein H;Heterogeneous nuclear ribonucleoprotein H, N-terminally processed	HNRNPH1	-	-	-	-	0.147823	0.601752	28.7995	28.2514	28.5589	28.4006	28.48	28.2858
P31946	P31946	14-3-3 protein beta/alpha;14-3-3 protein beta/alpha, N-terminally processed	YWHAB	-	-	-	YES	-0.185577	0.479354	30.7157	30.1592	30.7783	30.5465	30.7275	30.9359
P31947;P31947-2	P31947;P31947-2	14-3-3 protein sigma	SFN	-	-	-	YES	-0.318423	0.214599	28.823	28.3416	28.5325	28.8151	28.7778	29.0594
P31948;P31948-3;P31948-2	P31948;P31948-3;P31948-2	Stress-induced-phosphoprotein 1	STIP1	-	-	-	-	-0.16034	0.615852	29.6914	29.277	29.5859	29.8111	29.648	29.5762
P31949	P31949	Protein S100-A11;Protein S100-A11, N-terminally processed	S100A11	YES	Matrisome-associated	Secreted Factors	YES	0.09437	0.882164	27.7077	26.7004	27.2997	27.1943	27.638	26.5925
P32004-3;P32004-2;P32004	P32004-3;P32004-2;P32004	Neural cell adhesion molecule L1	L1CAM	-	-	-	-	-0.0442967	0.894409	26.9373	26.8722	27.5452	26.8721	27.2647	27.3509
P32119;P32119-2	P32119	Peroxiredoxin-2	PRDX2	-	-	-	YES	-0.04015	0.902979	29.2039	28.892	29.03	28.9059	29.3435	28.997
P33176;O60282;Q12840;O60282-2	P33176	Kinesin-1 heavy chain	KIF5B	-	-	-	-	0.13853	0.662918	25.8872	25.636	25.7365	25.5729	25.8351	25.4361
P33240-2;P33240	P33240-2;P33240	Cleavage stimulation factor subunit 2	CSTF2	-	-	-	-	0.11583	0.763061	26.7932	25.9431	26.0743	26.419	26.3005	25.7435
P33316-2;P33316	P33316-2;P33316	Deoxyuridine 5-triphosphate nucleotidohydrolase, mitochondrial	DUT	-	-	-	YES	-0.348583	0.26918	27.2514	27.0596	26.7734	26.8399	27.4516	27.8387
P33993;P33993-3;P33993-2	P33993;P33993-3;P33993-2	DNA replication licensing factor MCM7	MCM7	-	-	-	-	0.603823	0.242044	24.4727	23.9828	24.1645	23.7888	23.2177	23.8021
P34931	P34931	Heat shock 70 kDa protein 1-like	HSPA1L	-	-	-	-	1.77654	0.246675	28.6553	28.1694	28.2672	28.4819	28.2848	22.9956
P34932;P34932-2	P34932	Heat shock 70 kDa protein 4	HSPA4	-	-	-	YES	0.0365533	0.847858	29.6494	29.4231	29.7004	29.6233	29.454	29.5859
P35237	P35237	Serpin B6	SERPINB6	YES	Matrisome-associated	ECM Regulators	YES	-0.119763	0.824353	26.9845	26.3374	26.7938	26.9795	26.7376	26.7579
P35241;P35241-5;P35241-4;P35241-2;P35241-3	P35241;P35241-5;P35241-4	Radixin	RDX	-	-	-	YES	-1.13184	0.103864	24.4635	24.5754	23.3303	26.1053	25.3744	24.2849
P35244	P35244	Replication protein A 14 kDa subunit	RPA3	-	-	-	-	-0.514237	0.164795	25.2972	24.0578	25.28	25.6409	25.3951	25.1418
P35443	P35443	Thrombospondin-4	THBS4	YES	Core matrisome	ECM Glycoproteins	YES	0.40421	0.573865	25.6918	26.6885	25.9391	25.3035	25.1641	26.6391
P35579;P35579-2;P35749-4;P35749-3;P35749;P35749-2;REV__Q08AF3;REV__Q9UKV3-5;REV__Q9UKV3	P35579;P35579-2	Myosin-9	MYH9	-	-	-	YES	-0.0992967	0.813512	30.4123	30.1431	30.0165	30.3194	30.3919	30.1585
P35606-2;P35606	P35606-2;P35606	Coatomer subunit beta	COPB2	-	-	-	-	-0.16768	0.476926	26.6663	26.4676	26.5076	26.6982	26.7029	26.7434
P35637-2;P35637	P35637-2;P35637	RNA-binding protein FUS	FUS	-	-	-	-	0.27646	0.406515	25.7451	25.4145	25.609	25.1717	25.398	25.3695
P35908	P35908	Keratin, type II cytoskeletal 2 epidermal	KRT2	-	-	-	YES	-0.85991	0.344725	31.4491	30.9393	29.6485	32.1399	33.0812	29.3954
P35998;P35998-2	P35998;P35998-2	26S protease regulatory subunit 7	PSMC2	-	-	-	-	0.03809	0.925394	27.2291	26.6356	26.7792	27.1329	27.0579	26.3389
P36578	P36578	60S ribosomal protein L4	RPL4	-	-	-	YES	-0.12616	0.78095	25.9095	26.2465	26.1602	26.1556	25.9549	26.5842
P37802;P37802-2;Q9UI15	P37802;P37802-2	Transgelin-2	TAGLN2	-	-	-	YES	0.18267	0.590398	29.7145	28.9862	29.395	29.3136	29.233	29.0011
P37837	P37837	Transaldolase	TALDO1	-	-	-	YES	0.0344933	0.887139	27.8371	27.791	27.9201	27.9798	27.6331	27.832
P38159;P38159-3;P38159-2;Q96E39;O75526;Q8N7X1	P38159;P38159-3;P38159-2;Q96E39;O75526	RNA-binding motif protein, X chromosome;RNA-binding motif protein, X chromosome, N-terminally processed;RNA binding motif protein, X-linked-like-1;RNA-binding motif protein, X-linked-like-2	RBMX;RBMXL1;RBMXL2	-	-	-	-	0.492727	0.331078	25.6495	25.3636	25.1114	24.3426	25.5216	24.7822
P38606-2;P38606	P38606-2;P38606	V-type proton ATPase catalytic subunit A	ATP6V1A	-	-	-	YES	-0.02776	0.946332	25.7246	25.4195	25.7023	25.7108	25.5131	25.7058
P38646	P38646	Stress-70 protein, mitochondrial	HSPA9	-	-	-	YES	-0.0911	0.750476	29.5779	29.106	29.0517	29.4829	29.5396	28.9866
P38919	P38919	Eukaryotic initiation factor 4A-III;Eukaryotic initiation factor 4A-III, N-terminally processed	EIF4A3	-	-	-	-	0.332433	0.621835	26.7301	26.3656	26.6338	26.3236	26.5359	25.8728
P39023;Q92901	P39023	60S ribosomal protein L3	RPL3	-	-	-	YES	0.479213	0.213335	26.9591	27.4827	26.9653	26.4266	26.2774	27.2654
P39687;O43423;O95626	P39687	Acidic leucine-rich nuclear phosphoprotein 32 family member A	ANP32A	-	-	-	-	-0.14218	0.64076	28.2334	27.5349	28.1903	28.3543	27.6925	28.3384
P40121;P40121-2	P40121;P40121-2	Macrophage-capping protein	CAPG	-	-	-	YES	-0.155147	0.768867	29.8547	29.133	29.3179	29.644	29.6585	29.4685
P40227;P40227-2;Q92526;Q92526-2;Q92526-3	P40227;P40227-2	T-complex protein 1 subunit zeta	CCT6A	-	-	-	YES	-0.0024	0.992036	28.6422	28.2737	28.6406	28.5859	28.5389	28.4388
P40925;P40925-3;P40925-2	P40925;P40925-3;P40925-2	Malate dehydrogenase, cytoplasmic	MDH1	-	-	-	YES	-0.279417	0.390709	27.5397	27.3104	27.636	28.0776	27.9916	27.2552
P40926;P40926-2	P40926;P40926-2	Malate dehydrogenase, mitochondrial	MDH2	-	-	-	YES	0.04994	0.852023	27.9423	27.7626	28.0339	27.9601	27.8298	27.799
P41250	P41250	Glycine--tRNA ligase	GARS	-	-	-	YES	0.0176867	0.950846	28.5257	28.1107	28.2772	28.6752	28.1727	28.0126
P41567;O60739	P41567;O60739	Eukaryotic translation initiation factor 1;Eukaryotic translation initiation factor 1b	EIF1;EIF1B	-	-	-	-	-0.02951	0.954183	26.5363	26.4247	26.6054	26.7796	26.5069	26.3685
P42167-3;P42167-2;P42167;P42166	P42167-3;P42167-2;P42167;P42166	Lamina-associated polypeptide 2, isoforms beta/gamma;Thymopoietin;Thymopentin;Lamina-associated polypeptide 2, isoform alpha;Thymopoietin;Thymopentin	TMPO	-	-	-	-	-0.186393	0.709751	25.9627	25.5423	25.9922	25.8822	26.0928	26.0814
P42785;P42785-2	P42785;P42785-2	Lysosomal Pro-X carboxypeptidase	PRCP	-	-	-	YES	0.08853	0.849414	29.1365	29.0752	29.1742	29.6354	29.0515	28.4334
P43034;P43034-2	P43034	Platelet-activating factor acetylhydrolase IB subunit alpha	PAFAH1B1	-	-	-	YES	-0.142913	0.540204	26.379	25.9106	26.3083	26.6089	26.2444	26.1733
P43243;P43243-2	P43243;P43243-2	Matrin-3	MATR3	-	-	-	-	-0.10104	0.870073	25.8877	26.1272	25.7793	25.9153	26.032	26.15
P43487-2;P43487	P43487-2;P43487	Ran-specific GTPase-activating protein	RANBP1	-	-	-	-	1.13099	0.267758	27.3536	27.2546	27.5474	23.7306	27.1593	27.8727
P43490	P43490	Nicotinamide phosphoribosyltransferase	NAMPT	-	-	-	YES	-0.0525967	0.850999	27.4085	27.3861	27.6267	27.6134	27.3871	27.5786
P43686-2;P43686	P43686-2;P43686	26S protease regulatory subunit 6B	PSMC4	-	-	-	-	-0.0283233	0.915058	26.7967	26.1963	26.3316	26.7176	26.4004	26.2916
P45973	P45973	Chromobox protein homolog 5	CBX5	-	-	-	-	0.216407	0.452815	24.5691	24.5067	24.3699	24.0059	23.9761	24.8146
P45974-2;P45974;Q92995-2;Q92995	P45974-2;P45974	Ubiquitin carboxyl-terminal hydrolase 5	USP5	-	-	-	-	-0.168857	0.502802	27.2343	26.937	27.1579	27.3164	27.3489	27.1704
P46108;P46108-2	P46108;P46108-2	Adapter molecule crk	CRK	-	-	-	YES	-0.2968	0.413275	26.5142	25.8559	26.644	26.9476	26.8832	26.0738
P46109	P46109	Crk-like protein	CRKL	-	-	-	-	-0.0476267	0.927413	25.9015	25.6353	25.8989	26.1186	25.7368	25.7233
P46777	P46777	60S ribosomal protein L5	RPL5	-	-	-	YES	0.173443	0.498428	27.0429	26.6979	26.9072	26.6084	26.6862	26.8332
P46778	P46778	60S ribosomal protein L21	RPL21	-	-	-	-	0.416563	0.138282	25.203	25.6754	25.3835	24.6944	24.919	25.3987
P46782	P46782	40S ribosomal protein S5;40S ribosomal protein S5, N-terminally processed	RPS5	-	-	-	YES	-0.0563467	0.856867	26.4613	26.3992	26.2032	26.489	26.6007	26.1429
P46940	P46940	Ras GTPase-activating-like protein IQGAP1	IQGAP1	-	-	-	YES	-0.110813	0.696748	27.8255	27.5111	27.4171	27.9606	27.7358	27.3898
P47224	P47224	Guanine nucleotide exchange factor MSS4	RABIF	-	-	-	-	0.0565333	0.86862	23.53	24.2475	25.0623	24.5153	24.0392	24.1158
P47756-2;P47756	P47756-2;P47756	F-actin-capping protein subunit beta	CAPZB	-	-	-	YES	-0.241313	0.261028	27.9335	27.5444	27.9659	27.9665	28.2325	27.9688
P48147	P48147	Prolyl endopeptidase	PREP	-	-	-	-	-0.12595	0.836445	25.9998	25.483	25.1572	25.7844	26.0002	25.2332
P48444;P48444-2	P48444;P48444-2	Coatomer subunit delta	ARCN1	-	-	-	-	-0.45657	0.175513	25.0417	25.3262	25.8194	26.152	25.9361	25.4689
P48637;P48637-2	P48637;P48637-2	Glutathione synthetase	GSS	-	-	-	YES	-0.218687	0.412139	28.3004	27.8518	27.9589	28.4918	28.2633	28.0121
P48643;P48643-2	P48643;P48643-2	T-complex protein 1 subunit epsilon	CCT5	-	-	-	YES	0.04351	0.862682	29.591	28.9265	29.0877	29.3539	29.2917	28.829
P49006	P49006	MARCKS-related protein	MARCKSL1	-	-	-	YES	0.37609	0.348863	24.7747	24.4817	24.8408	24.5741	24.936	23.4588
P49189;P49189-2	P49189	4-trimethylaminobutyraldehyde dehydrogenase	ALDH9A1	-	-	-	YES	0.352293	0.384393	26.739	26.1528	26.4746	26.7892	26.6223	24.8981
P49321;P49321-3;P49321-4;P49321-2	P49321;P49321-3;P49321-4;P49321-2	Nuclear autoantigenic sperm protein	NASP	-	-	-	-	-0.0312	0.913504	28.5651	28.0345	28.5467	28.4408	28.2063	28.5929
P49327	P49327	Fatty acid synthase;[Acyl-carrier-protein] S-acetyltransferase;[Acyl-carrier-protein] S-malonyltransferase;3-oxoacyl-[acyl-carrier-protein] synthase;3-oxoacyl-[acyl-carrier-protein] reductase;3-hydroxyacyl-[acyl-carrier-protein] dehydratase;Enoyl-[acyl-carrier-protein] reductase;Oleoyl-[acyl-carrier-protein] hydrolase	FASN	-	-	-	YES	0.07101	0.90309	28.3632	27.9602	27.6115	28.2811	28.0633	27.3774
P49368;P49368-2	P49368;P49368-2	T-complex protein 1 subunit gamma	CCT3	-	-	-	YES	-0.01201	0.966009	28.6748	28.321	28.4809	28.7228	28.4055	28.3844
P49588;P49588-2	P49588;P49588-2	Alanine--tRNA ligase, cytoplasmic	AARS	-	-	-	YES	0.0833433	0.806387	27.0437	26.5529	27.096	26.9956	26.826	26.621
P49720	P49720	Proteasome subunit beta type-3	PSMB3	-	-	-	YES	-0.00421667	0.990756	25.7533	25.7106	25.7807	25.9017	25.8315	25.5241
P49721	P49721	Proteasome subunit beta type-2	PSMB2	-	-	-	YES	0.262917	0.510303	27.6982	27.1705	27.3275	27.5659	27.3027	26.5388
P49736	P49736	DNA replication licensing factor MCM2	MCM2	-	-	-	-	-0.14663	0.724895	24.3947	24.8583	23.8472	24.4808	24.4675	24.5919
P49915-2;P49915	P49915-2;P49915	GMP synthase [glutamine-hydrolyzing]	GMPS	-	-	-	-	0.36435	0.485233	25.6222	24.2707	25.3617	25.1618	24.7288	24.2709
P50395;P50395-2	P50395;P50395-2	Rab GDP dissociation inhibitor beta	GDI2	-	-	-	YES	0.0982433	0.7191	30.0574	29.7786	29.8645	29.983	29.7763	29.6464
P50454	P50454	Serpin H1	SERPINH1	YES	Matrisome-associated	ECM Regulators	-	0.13535	0.646686	27.9788	27.6179	28.1101	27.9902	27.7257	27.5848
P50502;Q8NFI4;Q8IZP2	P50502;Q8NFI4;Q8IZP2	Hsc70-interacting protein;Putative protein FAM10A5;Putative protein FAM10A4	ST13;ST13P5;ST13P4	-	-	-	-	-0.08653	0.7577	26.1416	25.6288	26.2136	26.2258	25.7622	26.2555
P50579-3;P50579-2;P50579	P50579-3;P50579-2;P50579	Methionine aminopeptidase 2	METAP2	-	-	-	-	-0.232173	0.587153	26.9222	25.8632	26.2596	25.8711	26.7747	27.0957
P50990;P50990-2;P50990-3	P50990;P50990-2;P50990-3	T-complex protein 1 subunit theta	CCT8	-	-	-	YES	-0.15447	0.596887	29.6066	28.753	29.1011	29.5375	29.4657	28.9209
P50991;P50991-2	P50991;P50991-2	T-complex protein 1 subunit delta	CCT4	-	-	-	YES	0.30672	0.481989	28.2881	28.2059	27.977	27.9826	27.956	27.6122
P51114-3;P51114-2;P51114;P51116	P51114-3;P51114-2;P51114	Fragile X mental retardation syndrome-related protein 1	FXR1	-	-	-	-	0.37766	0.463586	25.4965	25.5229	25.2991	24.0738	25.4341	25.6776
P51858;P51858-2;P51858-3;Q9Y3E1;O75475-3;O75475-2;O75475;Q7Z4V5-4;Q7Z4V5-3	P51858;P51858-2;P51858-3	Hepatoma-derived growth factor	HDGF	-	-	-	-	-0.07212	0.762823	28.3957	27.9268	28.4442	28.2988	28.0882	28.5962
P51991-2;P51991	P51991-2;P51991	Heterogeneous nuclear ribonucleoprotein A3	HNRNPA3	-	-	-	-	0.28022	0.350898	27.3997	27.0864	26.9414	26.9066	26.9498	26.7305
P52209-2;P52209	P52209-2;P52209	6-phosphogluconate dehydrogenase, decarboxylating	PGD	-	-	-	YES	0.536397	0.330557	26.6563	26.0881	25.7807	26.2435	25.2762	25.3963
P52272-2;P52272	P52272-2;P52272	Heterogeneous nuclear ribonucleoprotein M	HNRNPM	-	-	-	YES	0.0769233	0.872917	28.004	28.2363	26.9031	27.7345	27.9363	27.2418
P52565;P52565-2	P52565;P52565-2	Rho GDP-dissociation inhibitor 1	ARHGDIA	-	-	-	YES	0.5891	0.249618	27.8624	28.322	28.2344	26.0517	28.0446	28.5552
P52597	P52597	Heterogeneous nuclear ribonucleoprotein F;Heterogeneous nuclear ribonucleoprotein F, N-terminally processed	HNRNPF	-	-	-	-	-0.155527	0.527827	27.2277	26.8118	27.4438	27.4309	27.1507	27.3682
P52788;P52788-2	P52788;P52788-2	Spermine synthase	SMS	-	-	-	YES	0.0293733	0.880878	26.4184	26.242	26.4903	26.2663	26.3345	26.4618
P52823;P52823-2	P52823;P52823-2	Stanniocalcin-1	STC1	-	-	-	-	-0.391677	0.505114	28.1498	28.1485	28.3852	27.6684	28.8404	29.3498
P52888;P52888-2	P52888;P52888-2	Thimet oligopeptidase	THOP1	-	-	-	-	0.16867	0.55333	25.9181	25.9613	25.8073	26.1535	25.4791	25.5482
P52907	P52907	F-actin-capping protein subunit alpha-1	CAPZA1	-	-	-	YES	-0.0805033	0.736388	28.2627	27.8597	28.0267	28.3481	28.018	28.0245
P53041	P53041	Serine/threonine-protein phosphatase 5	PPP5C	-	-	-	-	-0.11078	0.823009	25.1637	25.8216	24.5087	24.6724	25.8155	25.3385
P53396-2;P53396;P53396-3	P53396-2;P53396;P53396-3	ATP-citrate synthase	ACLY	-	-	-	YES	0.0265667	0.970034	27.5198	27.369	27.353	27.5592	27.4758	27.1271
P53621;P53621-2	P53621;P53621-2	Coatomer subunit alpha;Xenin;Proxenin	COPA	-	-	-	YES	-0.01803	0.955643	25.473	25.1591	25.3281	25.6258	25.7738	24.6146
P53999	P53999	Activated RNA polymerase II transcriptional coactivator p15	SUB1	-	-	-	YES	0.0618367	0.938261	26.7435	27.0213	26.8023	26.7997	26.8277	26.7542
P54136;P54136-2	P54136;P54136-2	Arginine--tRNA ligase, cytoplasmic	RARS	-	-	-	YES	-0.0274467	0.922692	26.3223	26.0091	25.7282	26.378	26.034	25.7298
P54578-2;P54578-3;P54578	P54578-2;P54578-3;P54578	Ubiquitin carboxyl-terminal hydrolase 14	USP14	-	-	-	YES	0.0146533	0.949814	27.3019	26.8271	27.1989	27.1511	26.9307	27.2022
P54727;P54727-2	P54727;P54727-2	UV excision repair protein RAD23 homolog B	RAD23B	-	-	-	-	0.351787	0.727909	28.4058	27.3711	27.3834	27.7366	27.329	27.0394
P54819-5;P54819-2;P54819;P54819-3;P54819-6;P54819-4	P54819-5;P54819-2;P54819;P54819-3;P54819-6	Adenylate kinase 2, mitochondrial;Adenylate kinase 2, mitochondrial, N-terminally processed	AK2	-	-	-	YES	0.200197	0.483529	26.5696	26.1164	26.2451	26.511	25.956	25.8635
P55036;P55036-2	P55036	26S proteasome non-ATPase regulatory subunit 4	PSMD4	-	-	-	-	-0.129743	0.7683	26.9402	26.4869	26.8973	26.6835	27.0443	26.9859
P55060-3;P55060;P55060-4;P55060-2	P55060-3;P55060;P55060-4;P55060-2	Exportin-2	CSE1L	-	-	-	YES	0.0634333	0.824379	27.8146	27.5978	27.682	28.0082	27.5696	27.3263
P55072	P55072	Transitional endoplasmic reticulum ATPase	VCP	-	-	-	YES	0.0496633	0.838801	30.702	30.2963	30.4052	30.5257	30.4093	30.3194
P55209-2;P55209;P55209-3	P55209-2;P55209;P55209-3	Nucleosome assembly protein 1-like 1	NAP1L1	-	-	-	-	-0.0920567	0.773614	30.3056	29.907	30.3116	30.3178	30.1797	30.3029
P55268	P55268	Laminin subunit beta-2	LAMB2	YES	Core matrisome	ECM Glycoproteins	YES	-0.55746	0.157222	28.3454	28.6684	28.77	29.1055	29.1432	29.2074
P55786;P55786-2;A6NEC2;A6NEC2-3;A6NEC2-2	P55786;P55786-2	Puromycin-sensitive aminopeptidase	NPEPPS	-	-	-	YES	-0.276557	0.191734	26.72	26.5963	26.4622	26.8411	26.9579	26.8092
P55795	P55795	Heterogeneous nuclear ribonucleoprotein H2	HNRNPH2	-	-	-	-	0.419987	0.554817	25.5641	25.1966	25.1543	24.1988	25.4721	24.9842
P55884;P55884-2	P55884;P55884-2	Eukaryotic translation initiation factor 3 subunit B	EIF3B	-	-	-	YES	-0.137177	0.63052	28.423	28.1841	28.1777	28.5159	28.4884	28.1921
P56537;P56537-2	P56537;P56537-2	Eukaryotic translation initiation factor 6	EIF6	-	-	-	YES	-0.09603	0.741966	29.7915	29.4979	29.6075	29.6378	29.7052	29.842
P59998;P59998-2;P59998-3;P59998-4	P59998;P59998-2;P59998-3	Actin-related protein 2/3 complex subunit 4	ARPC4	-	-	-	YES	0.150293	0.810465	25.7943	26.5217	25.446	26.5082	25.6185	25.1843
P60174-1;P60174;P60174-4	P60174-1;P60174;P60174-4	Triosephosphate isomerase	TPI1	-	-	-	YES	0.0572033	0.798636	30.3269	30.0172	30.1459	30.1121	30.1058	30.1005
P60660-2;P60660;P14649	P60660-2;P60660	Myosin light polypeptide 6	MYL6	-	-	-	YES	-0.0727267	0.719019	29.7764	29.5916	29.5875	29.7288	29.743	29.7018
P60842;P60842-2	P60842;P60842-2	Eukaryotic initiation factor 4A-I	EIF4A1	-	-	-	YES	0.17076	0.641244	31.1108	30.7336	30.9592	31.1699	30.793	30.3285
P60866;P60866-2	P60866;P60866-2	40S ribosomal protein S20	RPS20	-	-	-	YES	0.49772	0.300508	25.0648	25.1244	24.9441	23.9695	25.0379	24.6328
P60900;P60900-2;P60900-3	P60900;P60900-2	Proteasome subunit alpha type-6	PSMA6	-	-	-	YES	-0.00501333	0.982234	28.7644	28.1355	28.4406	28.5116	28.4573	28.3866
P61086-2;P61086;P61086-3	P61086-2;P61086	Ubiquitin-conjugating enzyme E2 K	UBE2K	-	-	-	-	0.0521433	0.920716	26.0913	25.7573	26.1472	26.1226	26.0149	25.7019
P61088;Q5JXB2	P61088;Q5JXB2	Ubiquitin-conjugating enzyme E2 N;Putative ubiquitin-conjugating enzyme E2 N-like	UBE2N;UBE2NL	-	-	-	-	-0.0927733	0.81925	27.1032	27.1149	27.376	27.4935	27.5526	26.8263
P61158;Q9P1U1-2;Q9P1U1;Q9P1U1-3;Q9C0K3	P61158	Actin-related protein 3	ACTR3	-	-	-	YES	0.103807	0.640867	28.9475	28.6383	28.553	28.7794	28.5523	28.4956
P61160;P61160-2	P61160;P61160-2	Actin-related protein 2	ACTR2	-	-	-	YES	-0.114777	0.727303	27.2148	26.8023	26.8991	26.9618	27.1997	27.0991
P61247	P61247	40S ribosomal protein S3a	RPS3A	-	-	-	YES	-0.125803	0.658973	26.5113	26.605	26.8721	27.0074	26.8235	26.5348
P61254;Q9UNX3	P61254;Q9UNX3	60S ribosomal protein L26;60S ribosomal protein L26-like 1	RPL26;RPL26L1	-	-	-	-	0.42158	0.475737	24.5189	24.9358	25.8941	24.0972	24.6228	25.364
P61289;P61289-3;P61289-2	P61289;P61289-3;P61289-2	Proteasome activator complex subunit 3	PSME3	-	-	-	-	0.0161067	0.949588	27.2189	26.9862	26.9424	27.2323	26.8745	26.9923
P61313;P61313-2	P61313;P61313-2	60S ribosomal protein L15	RPL15	-	-	-	-	-0.510463	0.367422	26.5053	25.6777	25.7113	26.8673	26.0426	26.5159
P61457	P61457	Pterin-4-alpha-carbinolamine dehydratase	PCBD1	-	-	-	YES	-0.14038	0.651932	25.7127	25.2263	25.4591	26.0821	25.7741	24.963
P61769	P61769	Beta-2-microglobulin;Beta-2-microglobulin form pI 5.3	B2M	-	-	-	YES	-0.54506	0.282957	28.4586	28.7565	29.6575	28.7184	30.004	29.7853
P61970	P61970	Nuclear transport factor 2	NUTF2	-	-	-	YES	-0.111863	0.691154	27.5794	26.9877	27.3603	27.6816	27.3857	27.1957
P61978-2;P61978	P61978-2;P61978	Heterogeneous nuclear ribonucleoprotein K	HNRNPK	-	-	-	YES	-0.12413	0.598014	30.5	29.8193	30.0328	30.2539	30.206	30.2645
P61981	P61981	14-3-3 protein gamma;14-3-3 protein gamma, N-terminally processed	YWHAG	-	-	-	YES	0.0151367	0.94549	29.4902	29.1863	29.3508	29.2216	29.2077	29.5526
P62081	P62081	40S ribosomal protein S7	RPS7	-	-	-	-	0.136973	0.757321	25.0771	25.8125	25.5984	25.4219	25.0518	25.6034
P62136;P62136-2;P62136-3	P62136;P62136-2;P62136-3	Serine/threonine-protein phosphatase PP1-alpha catalytic subunit	PPP1CA	-	-	-	YES	0.11423	0.85028	27.151	26.8382	26.0953	26.9053	26.7718	26.0648
P62191;P62191-2	P62191;P62191-2	26S protease regulatory subunit 4	PSMC1	-	-	-	-	-0.12372	0.615605	25.9808	25.6484	25.4439	25.6235	26.0477	25.773
P62195;P62195-2	P62195;P62195-2	26S protease regulatory subunit 8	PSMC5	-	-	-	YES	0.17768	0.610774	26.3681	26.3747	26.0227	26.3113	26.1186	25.8025
P62241	P62241	40S ribosomal protein S8	RPS8	-	-	-	YES	-0.217063	0.477838	27.0472	27.1549	27.2524	27.1756	27.2296	27.7005
P62258;P62258-2	P62258;P62258-2	14-3-3 protein epsilon	YWHAE	-	-	-	YES	-0.128223	0.586671	31.6793	31.1097	31.599	31.4175	31.5704	31.7847
P62280	P62280	40S ribosomal protein S11	RPS11	-	-	-	YES	0.0889433	0.694238	25.8091	25.7568	26.0551	25.8535	25.5582	25.9425
P62310	P62310	U6 snRNA-associated Sm-like protein LSm3	LSM3	-	-	-	-	0.0293833	0.895408	27.6602	27.4719	27.5645	27.7724	27.4138	27.4222
P62314	P62314	Small nuclear ribonucleoprotein Sm D1	SNRPD1	-	-	-	-	1.13597	0.165463	26.6527	26.8898	25.7317	24.9456	26.307	24.6137
P62318-2;P62318	P62318-2;P62318	Small nuclear ribonucleoprotein Sm D3	SNRPD3	-	-	-	-	0.0906267	0.912158	27.7416	27.7643	27.5738	27.7148	27.5977	27.4953
P62333	P62333	26S protease regulatory subunit 10B	PSMC6	-	-	-	YES	0.22495	0.720702	27.0946	27.4123	26.7993	27.0654	26.9575	26.6085
P62491-2;Q15907-2;P62491;Q15907;P57735	P62491-2;Q15907-2;P62491;Q15907	Ras-related protein Rab-11A;Ras-related protein Rab-11B	RAB11A;RAB11B	-	-	-	-	1.02617	0.0821898	25.8268	25.7752	25.8503	23.3967	25.4931	25.484
P62495;P62495-2	P62495;P62495-2	Eukaryotic peptide chain release factor subunit 1	ETF1	-	-	-	-	-0.08688	0.748415	25.4104	25.3966	25.7918	25.8451	25.5368	25.4774
P62750	P62750	60S ribosomal protein L23a	RPL23A	-	-	-	YES	-0.138643	0.751989	25.8347	25.8888	25.4784	25.7129	26.0789	25.8261
P62753	P62753	40S ribosomal protein S6	RPS6	-	-	-	-	-0.306653	0.261764	25.8272	25.8204	26.005	26.3132	26.0571	26.2022
P62826	P62826	GTP-binding nuclear protein Ran	RAN	-	-	-	YES	1.04812	0.0569041	26.4458	26.057	25.7688	23.9346	26.2192	24.9734
P62851	P62851	40S ribosomal protein S25	RPS25	-	-	-	YES	-0.271157	0.596289	24.9817	25.2255	24.0151	25.1532	24.9353	24.9472
P62906	P62906	60S ribosomal protein L10a	RPL10A	-	-	-	YES	0.25561	0.503501	28.1451	28.5654	27.5116	28.1412	28.0636	27.2505
P62937;P62937-2;P0DN26;A0A0B4J2A2;A0A075B759;Q9Y536;F5H284;P0DN37;O43447-2	P62937;P62937-2	Peptidyl-prolyl cis-trans isomerase A;Peptidyl-prolyl cis-trans isomerase A, N-terminally processed	PPIA	-	-	-	YES	0.232593	0.537584	31.3433	30.7799	31.0178	30.8474	31.2908	30.3051
P62993;P62993-2	P62993;P62993-2	Growth factor receptor-bound protein 2	GRB2	-	-	-	YES	-0.169153	0.613863	26.7187	26.3492	26.3151	26.6693	26.9024	26.3187
P63104;P63104-2	P63104;P63104-2	14-3-3 protein zeta/delta	YWHAZ	-	-	-	YES	-0.101477	0.68886	33.1357	32.6358	33.1292	32.9719	33.0257	33.2075
P63208;P63208-2	P63208;P63208-2	S-phase kinase-associated protein 1	SKP1	-	-	-	-	-0.201777	0.791767	27.6282	27.159	27.3239	27.626	27.3444	27.746
P63220	P63220	40S ribosomal protein S21	RPS21	-	-	-	-	0.12771	0.733067	27.4849	27.182	27.2296	27.1151	27.6013	26.797
P63241;P63241-2;Q6IS14;Q9GZV4	P63241;P63241-2;Q6IS14	Eukaryotic translation initiation factor 5A-1;Eukaryotic translation initiation factor 5A-1-like	EIF5A;EIF5AL1	-	-	-	-	-0.142197	0.765947	28.7179	28.2482	27.9811	28.6536	28.745	27.9751
P63244	P63244	Guanine nucleotide-binding protein subunit beta-2-like 1;Guanine nucleotide-binding protein subunit beta-2-like 1, N-terminally processed	GNB2L1	-	-	-	-	0.14266	0.691662	28.5677	28.125	27.8278	28.222	28.373	27.4975
P63261	P63261	Actin, cytoplasmic 2;Actin, cytoplasmic 2, N-terminally processed	ACTG1	-	-	-	YES	0.2342	0.240322	34.638	34.7998	34.5896	34.2409	34.3499	34.7339
P67775;P62714;P67775-2	P67775;P62714;P67775-2	Serine/threonine-protein phosphatase 2A catalytic subunit alpha isoform;Serine/threonine-protein phosphatase 2A catalytic subunit beta isoform	PPP2CA;PPP2CB	-	-	-	-	0.577607	0.249801	26.0633	25.5687	25.6635	23.8226	26.0831	25.657
P67809;Q9Y2T7	P67809	Nuclease-sensitive element-binding protein 1	YBX1	-	-	-	YES	-0.05069	0.853545	28.477	27.9151	27.8681	27.6659	28.3269	28.4196
P67936	P67936	Tropomyosin alpha-4 chain	TPM4	-	-	-	YES	-0.0477867	0.860147	29.8073	29.3964	29.6458	29.3535	29.6798	29.9595
P68133;P68032;P63267;P62736	P68133;P68032;P63267;P62736	Actin, alpha skeletal muscle;Actin, alpha cardiac muscle 1;Actin, gamma-enteric smooth muscle;Actin, aortic smooth muscle	ACTA1;ACTC1;ACTG2;ACTA2	-	-	-	-	-0.70647	0.574831	28.2781	30.5067	23.9428	27.9201	28.2463	28.6806
Q5VTE0;P68104;P68104-2	Q5VTE0;P68104;P68104-2	Putative elongation factor 1-alpha-like 3;Elongation factor 1-alpha 1	EEF1A1P5;EEF1A1	-	-	-	-	0.240837	0.403534	31.8827	31.2122	31.464	31.6926	31.202	30.9418
P68363;P68363-2;A6NHL2-2;A6NHL2;Q9H853	P68363;P68363-2	Tubulin alpha-1B chain	TUBA1B	-	-	-	-	0.241893	0.388296	32.5459	31.9069	32.3116	32.1943	31.9702	31.8741
P68371;P04350	P68371;P04350	Tubulin beta-4B chain;Tubulin beta-4A chain	TUBB4B;TUBB4A	-	-	-	-	0.148147	0.56461	31.9689	31.3883	31.3308	31.6066	31.3672	31.2697
Q8NEV1;P68400;P68400-2	Q8NEV1;P68400;P68400-2	Casein kinase II subunit alpha 3;Casein kinase II subunit alpha	CSNK2A3;CSNK2A1	-	-	-	-	-0.0474933	0.899716	25.8454	25.3788	24.9592	25.5746	25.753	24.9982
Q71DI3;P84243;P68431;Q6NXT2;Q16695	Q71DI3;P84243;P68431;Q6NXT2;Q16695	Histone H3.2;Histone H3.3;Histone H3.1;Histone H3.3C;Histone H3.1t	HIST2H3A;H3F3A;HIST1H3A;H3F3C;HIST3H3	-	-	-	-	0.698623	0.457184	25.8823	26.6831	26.8583	24.3385	25.6192	27.3701
P78371;P78371-2	P78371;P78371-2	T-complex protein 1 subunit beta	CCT2	-	-	-	YES	0.06039	0.828365	29.4735	29.0108	29.2837	29.4257	29.1217	29.0395
P78406	P78406	mRNA export factor	RAE1	-	-	-	-	-0.433307	0.443392	25.0508	25.2139	22.9872	24.5465	24.9885	25.0168
P78417;P78417-2;P78417-3	P78417;P78417-2;P78417-3	Glutathione S-transferase omega-1	GSTO1	-	-	-	YES	0.06107	0.902982	27.2096	26.7679	26.4363	26.8158	27.1716	26.2431
P78536-2;P78536	P78536-2;P78536	Disintegrin and metalloproteinase domain-containing protein 17	ADAM17	YES	Matrisome-associated	ECM Regulators	-	-0.405773	0.411798	25.8168	25.6121	26.11	25.991	25.9973	26.768
P80303-2;P80303	P80303-2;P80303	Nucleobindin-2;Nesfatin-1	NUCB2	-	-	-	YES	-0.339727	0.173044	26.8571	26.8544	27.066	27.2695	27.0654	27.4618
P80723;P80723-2	P80723;P80723-2	Brain acid soluble protein 1	BASP1	-	-	-	YES	-0.156323	0.677231	26.2783	26.0353	26.5494	25.586	26.6125	27.1335
P81605;P81605-2	P81605;P81605-2	Dermcidin;Survival-promoting peptide;DCD-1	DCD	-	-	-	YES	0.55219	0.63809	28.0724	28.2433	28.5914	25.2862	27.9398	30.0246
P82979	P82979	SAP domain-containing ribonucleoprotein	SARNP	-	-	-	-	-0.0586533	0.873071	26.5881	25.6296	25.6667	26.3047	25.8651	25.8906
P84090	P84090	Enhancer of rudimentary homolog	ERH	-	-	-	-	0.10894	0.775974	27.0218	26.6914	27.0947	26.5905	26.9905	26.9
P84098	P84098	60S ribosomal protein L19	RPL19	-	-	-	-	-0.185237	0.718577	25.5353	25.5323	25.2906	25.5387	25.4926	25.8827
P84103-2;P84103	P84103-2;P84103	Serine/arginine-rich splicing factor 3	SRSF3	-	-	-	-	-0.192737	0.757841	28.1069	27.6969	26.2757	27.8915	27.8736	26.8926
P98160	P98160	Basement membrane-specific heparan sulfate proteoglycan core protein;Endorepellin;LG3 peptide	HSPG2	YES	Core matrisome	Proteoglycans	YES	-0.07959	0.793523	29.9881	30.0453	30.1363	30.2848	30.3237	29.7999
P98179	P98179	RNA-binding protein 3	RBM3	-	-	-	-	-0.895307	0.0134646	24.6136	25.2091	24.1862	25.6332	25.8333	25.2283
Q00610-2;Q00610;P53675-2;P53675	Q00610-2;Q00610	Clathrin heavy chain 1	CLTC	-	-	-	YES	0.148213	0.650318	30.2381	29.9202	29.7847	30.2231	29.8797	29.3956
Q00688	Q00688	Peptidyl-prolyl cis-trans isomerase FKBP3	FKBP3	-	-	-	-	-0.29562	0.652821	26.2453	25.8206	25.8124	26.6501	26.226	25.8891
Q00839-2;Q00839	Q00839-2;Q00839	Heterogeneous nuclear ribonucleoprotein U	HNRNPU	-	-	-	-	0.05322	0.865843	27.2734	27.1825	26.772	26.9001	27.2135	26.9547
Q01082;Q01082-3;Q01082-2;P11277-3;P11277;P11277-2;O15020-2;O15020	Q01082;Q01082-3;Q01082-2	Spectrin beta chain, non-erythrocytic 1	SPTBN1	-	-	-	YES	-0.10636	0.674152	29.916	29.4676	29.8114	29.9622	29.8666	29.6853
Q01105-2;Q01105-3;Q01105-4;P0DME0	Q01105-2;Q01105-3;Q01105-4;P0DME0	Protein SET;Protein SETSIP	SET;SETSIP	-	-	-	-	-0.15888	0.545672	29.0559	28.8415	29.1906	29.1214	28.9678	29.4755
Q01130-2;Q01130;Q9BRL6-2;Q9BRL6	Q01130-2;Q01130	Serine/arginine-rich splicing factor 2	SRSF2	-	-	-	-	-0.0809733	0.938745	28.7772	28.5426	28.0639	28.5914	28.5761	28.4592
Q01518;Q01518-2	Q01518;Q01518-2	Adenylyl cyclase-associated protein 1	CAP1	-	-	-	YES	-0.0298833	0.926714	29.2631	28.8513	28.9841	28.9262	29.1831	29.0788
Q02790	Q02790	Peptidyl-prolyl cis-trans isomerase FKBP4;Peptidyl-prolyl cis-trans isomerase FKBP4, N-terminally processed	FKBP4	-	-	-	YES	-0.147113	0.491052	28.017	27.6158	28.0398	28.0121	28.096	28.0058
Q02809;Q02809-2	Q02809;Q02809-2	Procollagen-lysine,2-oxoglutarate 5-dioxygenase 1	PLOD1	YES	Matrisome-associated	ECM Regulators	YES	0.0950367	0.87781	26.024	25.5946	25.5436	26.5463	26.2406	24.0901
Q02818	Q02818	Nucleobindin-1	NUCB1	-	-	-	YES	-0.42421	0.102361	29.6584	29.4987	30.0673	29.9664	30.0596	30.4711
Q02878	Q02878	60S ribosomal protein L6	RPL6	-	-	-	-	0.152737	0.755377	25.6288	26.2411	26.0118	25.5894	25.8735	25.9607
Q03252	Q03252	Lamin-B2	LMNB2	-	-	-	-	-0.125057	0.696615	26.8043	26.3968	26.7779	26.5912	26.9651	26.7979
Q04323;Q04323-2	Q04323;Q04323-2	UBX domain-containing protein 1	UBXN1	-	-	-	-	0.43816	0.265008	26.853	25.7979	25.9044	25.9208	26.0769	25.2432
Q04446	Q04446	1,4-alpha-glucan-branching enzyme	GBE1	-	-	-	YES	-0.291553	0.447294	27.698	27.4575	27.3375	27.7199	28.3762	27.2715
Q04760-2;Q04760	Q04760-2;Q04760	Lactoylglutathione lyase	GLO1	-	-	-	YES	-0.06809	0.758419	29.1502	28.6566	29.1663	29.1183	29.04	29.0191
Q04837	Q04837	Single-stranded DNA-binding protein, mitochondrial	SSBP1	-	-	-	YES	-0.00502667	0.994833	25.6022	23.5021	26.3812	26	25.4147	24.0858
Q04917	Q04917	14-3-3 protein eta	YWHAH	-	-	-	YES	-0.145507	0.555644	28.1811	27.5212	27.9617	27.9354	28.042	28.1231
Q05048	Q05048	Cleavage stimulation factor subunit 1	CSTF1	-	-	-	-	0.437093	0.233462	25.3151	25.0781	25.1946	24.4978	25.1439	24.6348
Q06124-2;Q06124;Q06124-3	Q06124-2;Q06124;Q06124-3	Tyrosine-protein phosphatase non-receptor type 11	PTPN11	-	-	-	-	-0.107713	0.643781	26.7296	26.3929	26.9569	26.8209	26.6942	26.8875
Q06210-2;Q06210;O94808	Q06210-2;Q06210	Glutamine--fructose-6-phosphate aminotransferase [isomerizing] 1	GFPT1	-	-	-	YES	-0.0468667	0.939242	25.1909	24.6334	23.7734	24.8091	24.3953	24.5339
Q06323;Q06323-3;Q06323-2	Q06323;Q06323-3;Q06323-2	Proteasome activator complex subunit 1	PSME1	-	-	-	YES	-0.0623767	0.881509	27.9655	27.4906	27.9681	28.1115	27.734	27.7659
Q06481;Q06481-2;Q06481-3;Q06481-6;Q06481-4;Q06481-5	Q06481;Q06481-2;Q06481-3;Q06481-6;Q06481-4;Q06481-5	Amyloid-like protein 2	APLP2	-	-	-	YES	0.0671267	0.848983	30.4991	30.638	31.0972	30.4688	30.5613	31.0028
Q06830	Q06830	Peroxiredoxin-1	PRDX1	-	-	-	YES	0.05121	0.83747	31.8545	31.4453	31.4957	31.6771	31.5993	31.3656
Q07021	Q07021	Complement component 1 Q subcomponent-binding protein, mitochondrial	C1QBP	-	-	-	-	-0.2459	0.684039	27.0678	26.3618	26.7005	27.2477	26.9111	26.709
Q07666-3;Q07666-2;Q07666;O75525-2;O75525;Q5VWX1	Q07666-3;Q07666-2;Q07666	KH domain-containing, RNA-binding, signal transduction-associated protein 1	KHDRBS1	-	-	-	-	0.0327833	0.926805	26.8442	26.5348	26.0242	26.6465	26.6345	26.0239
Q07954	Q07954	Prolow-density lipoprotein receptor-related protein 1;Low-density lipoprotein receptor-related protein 1 85 kDa subunit;Low-density lipoprotein receptor-related protein 1 515 kDa subunit;Low-density lipoprotein receptor-related protein 1 intracellular domain	LRP1	-	-	-	-	0.55881	0.174127	25.0116	26.0513	25.3739	24.9382	24.1359	25.6863
Q07955;Q07955-3;Q07955-2	Q07955;Q07955-3;Q07955-2	Serine/arginine-rich splicing factor 1	SRSF1	-	-	-	-	-0.07879	0.869036	29.0956	28.4271	28.5068	28.4757	29.0118	28.7782
Q08380	Q08380	Galectin-3-binding protein	LGALS3BP	-	-	-	YES	-0.0352433	0.87606	33.686	33.7649	33.9536	33.8097	33.9615	33.739
Q08945	Q08945	FACT complex subunit SSRP1	SSRP1	-	-	-	-	0.539663	0.278123	25.5136	25.5299	25.4017	25.6084	25.4425	23.7753
Q09666;Q09666-2	Q09666	Neuroblast differentiation-associated protein AHNAK	AHNAK	-	-	-	YES	0.209457	0.746537	27.5977	27.7124	27.8412	27.3322	27.647	27.5438
Q10567-4;Q10567-3;Q10567-2;Q10567	Q10567-4;Q10567-3;Q10567-2;Q10567	AP-1 complex subunit beta-1	AP1B1	-	-	-	-	0.01651	0.974227	25.7277	25.6461	25.7024	25.8461	25.7634	25.417
Q12765-3;Q12765;Q12765-2	Q12765-3;Q12765;Q12765-2	Secernin-1	SCRN1	-	-	-	-	-0.37147	0.294433	27.0463	26.5521	26.8798	26.8448	27.3162	27.4316
Q12792;Q12792-4;Q12792-3	Q12792;Q12792-4;Q12792-3	Twinfilin-1	TWF1	-	-	-	-	0.0502767	0.870977	26.0137	26.4034	26.1153	25.9988	26.0763	26.3064
Q12805-5;Q12805-2;Q12805-4;Q12805-3;Q12805	Q12805-5;Q12805-2;Q12805-4;Q12805-3;Q12805	EGF-containing fibulin-like extracellular matrix protein 1	EFEMP1	YES	Core matrisome	ECM Glycoproteins	YES	-0.224023	0.671105	28.2103	28.0646	28.7712	28.6785	28.0889	28.9507
Q12874	Q12874	Splicing factor 3A subunit 3	SF3A3	-	-	-	-	-0.53016	0.29684	26.4488	25.6909	25.8844	26.6831	26.6259	26.3055
Q12906;Q12906-7;Q12906-5;Q12906-4;Q12906-2;Q12906-6;Q12906-3;Q96SI9-2;Q96SI9	Q12906;Q12906-7;Q12906-5;Q12906-4;Q12906-2;Q12906-6;Q12906-3	Interleukin enhancer-binding factor 3	ILF3	-	-	-	-	0.246727	0.408753	28.1058	27.726	27.8223	27.7565	27.5227	27.6346
Q12907	Q12907	Vesicular integral-membrane protein VIP36	LMAN2	-	-	-	YES	0.693323	0.162052	26.1587	26.6382	26.9252	25.1497	25.9501	26.5424
Q13162	Q13162	Peroxiredoxin-4	PRDX4	-	-	-	YES	-0.245683	0.394822	26.9334	26.4872	26.8844	27.1843	26.8815	26.9762
Q13177;O75914-2;Q13153;Q13153-2;O75914;O75914-4;O75914-3	Q13177;O75914-2;Q13153;Q13153-2;O75914;O75914-4;O75914-3	Serine/threonine-protein kinase PAK 2;PAK-2p27;PAK-2p34;Serine/threonine-protein kinase PAK 3;Serine/threonine-protein kinase PAK 1	PAK2;PAK3;PAK1	-	-	-	-	0.11229	0.751804	25.6133	24.9128	25.7787	25.4526	25.2897	25.2256
Q13185	Q13185	Chromobox protein homolog 3	CBX3	-	-	-	-	-0.0892167	0.754236	28.7016	28.1512	28.7102	28.8065	28.5765	28.4477
Q13200;Q13200-3;Q13200-2	Q13200;Q13200-3;Q13200-2	26S proteasome non-ATPase regulatory subunit 2	PSMD2	-	-	-	YES	0.146697	0.668357	28.5695	27.7839	28.3532	28.4569	27.982	27.8276
Q13247-3;Q13247;Q13247-2;Q08170	Q13247-3;Q13247	Serine/arginine-rich splicing factor 6	SRSF6	-	-	-	-	-0.0248467	0.930991	28.4529	28.2454	28.2244	27.974	28.5778	28.4454
Q13263;Q13263-2	Q13263;Q13263-2	Transcription intermediary factor 1-beta	TRIM28	-	-	-	-	-0.06368	0.814784	27.3734	26.8215	26.7689	27.2133	27.0813	26.8603
Q13283;Q13283-2	Q13283	Ras GTPase-activating protein-binding protein 1	G3BP1	-	-	-	-	-0.187157	0.405929	27.3156	27.028	27.109	27.5437	27.1147	27.3557
Q13308-5;Q13308-4;Q13308;Q13308-6;Q13308-2;Q13308-3	Q13308-5;Q13308-4;Q13308;Q13308-6;Q13308-2;Q13308-3	Inactive tyrosine-protein kinase 7	PTK7	-	-	-	-	-0.20154	0.529499	27.2539	27.7021	27.959	27.7874	27.7117	28.0206
Q13347	Q13347	Eukaryotic translation initiation factor 3 subunit I	EIF3I	-	-	-	YES	-0.16736	0.53275	27.844	27.0706	27.7236	27.8795	27.5935	27.6673
Q13404;Q13404-7;Q13404-1;Q13404-2;Q13404-8;Q13404-6	Q13404;Q13404-7;Q13404-1;Q13404-2;Q13404-8;Q13404-6	Ubiquitin-conjugating enzyme E2 variant 1	UBE2V1	-	-	-	YES	0.585923	0.275959	27.0853	26.6979	26.8887	26.3361	25.9585	26.6195
Q13409-6;Q13409-3;Q13409-2;Q13409-7;Q13409-5;Q13409	Q13409-6;Q13409-3;Q13409-2;Q13409-7;Q13409-5;Q13409	Cytoplasmic dynein 1 intermediate chain 2	DYNC1I2	-	-	-	-	-0.203323	0.499655	26.7545	26.0388	26.533	26.4448	26.4826	27.0089
Q13435	Q13435	Splicing factor 3B subunit 2	SF3B2	-	-	-	-	-0.196813	0.603623	25.6947	24.9959	25.0149	25.7497	25.3881	25.1581
Q13561;Q13561-3;Q13561-2	Q13561;Q13561-3;Q13561-2	Dynactin subunit 2	DCTN2	-	-	-	YES	0.0169933	0.941994	26.4385	26.1198	26.3873	26.4573	26.3791	26.0581
Q13740-2;Q13740;Q13740-3;Q13740-4	Q13740-2;Q13740	CD166 antigen	ALCAM	-	-	-	YES	-0.323193	0.264638	28.8458	28.8998	29.1591	29.3826	29.1625	29.3291
Q13813-3;Q13813;Q13813-2	Q13813-3;Q13813;Q13813-2	Spectrin alpha chain, non-erythrocytic 1	SPTAN1	-	-	-	YES	-0.0259067	0.89595	30.0101	29.6954	29.9147	29.953	29.8598	29.8852
Q13838;Q13838-2	Q13838;Q13838-2	Spliceosome RNA helicase DDX39B	DDX39B	-	-	-	-	0.283827	0.342986	28.6933	28.3239	28.6466	28.5129	28.4612	27.8382
Q14019	Q14019	Coactosin-like protein	COTL1	-	-	-	YES	-0.0872267	0.879977	26.3615	25.8123	26.3671	26.2608	26.319	26.2228
Q14103-3;Q14103;Q14103-4;Q14103-2	Q14103-3;Q14103;Q14103-4;Q14103-2	Heterogeneous nuclear ribonucleoprotein D0	HNRNPD	-	-	-	-	-0.168083	0.706354	28.6761	28.8779	28.8359	28.2311	29.1391	29.5241
Q14118	Q14118	Dystroglycan;Alpha-dystroglycan;Beta-dystroglycan	DAG1	-	-	-	YES	-0.226497	0.377571	30.2426	30.481	30.773	30.5471	30.5407	31.0882
Q14152;Q14152-2	Q14152;Q14152-2	Eukaryotic translation initiation factor 3 subunit A	EIF3A	-	-	-	-	-0.169307	0.678051	28.3542	27.9502	27.8462	28.3495	28.465	27.8439
Q14204	Q14204	Cytoplasmic dynein 1 heavy chain 1	DYNC1H1	-	-	-	YES	0.164343	0.608538	27.8339	27.7541	27.1481	27.5184	27.5998	27.1248
Q14247-3;Q14247;Q14247-2	Q14247-3;Q14247;Q14247-2	Src substrate cortactin	CTTN	-	-	-	-	-1.76148	0.0341574	26.3255	24.6188	22.4311	26.1402	26.2076	26.312
Q14444-2;Q14444	Q14444-2;Q14444	Caprin-1	CAPRIN1	-	-	-	-	0.0302733	0.949442	26.9794	26.2451	26.9023	26.5123	26.7898	26.7339
Q14566	Q14566	DNA replication licensing factor MCM6	MCM6	-	-	-	-	0.12843	0.779616	26.644	26.0943	25.9198	26.3797	25.8977	25.9955
Q14696;Q14696-2	Q14696	LDLR chaperone MESD	MESDC2	-	-	-	-	0.192613	0.827041	25.0172	25.0591	25.606	24.2423	25.4507	25.4115
Q14697;Q14697-2	Q14697;Q14697-2	Neutral alpha-glucosidase AB	GANAB	-	-	-	YES	0.00524667	0.995432	29.0317	28.7044	28.576	29.0047	29.0943	28.1975
Q14764	Q14764	Major vault protein	MVP	-	-	-	YES	-0.0174633	0.952944	25.7082	25.9939	25.6527	25.8926	25.7838	25.7308
Q14847;Q14847-2;Q14847-3	Q14847;Q14847-2;Q14847-3	LIM and SH3 domain protein 1	LASP1	-	-	-	-	0.0541767	0.844132	29.241	28.5514	28.6242	28.8234	28.946	28.4847
Q14974;Q14974-2	Q14974;Q14974-2	Importin subunit beta-1	KPNB1	-	-	-	YES	0.13341	0.60377	29.704	29.7536	29.4779	29.6675	29.4902	29.3776
Q15008;Q15008-4;Q15008-3;Q15008-2	Q15008;Q15008-4;Q15008-3;Q15008-2	26S proteasome non-ATPase regulatory subunit 6	PSMD6	-	-	-	-	0.24748	0.691788	25.6449	25.2827	25.9966	25.6941	25.0671	25.4204
Q15019;Q15019-3;Q15019-2	Q15019;Q15019-3;Q15019-2	Septin-2	SEPT2	-	-	-	YES	0.125787	0.708588	27.7406	27.2107	27.2354	27.3285	27.4264	27.0544
Q15020-4;Q15020;Q15020-3;Q15020-2	Q15020-4;Q15020;Q15020-3;Q15020-2	Squamous cell carcinoma antigen recognized by T-cells 3	SART3	-	-	-	-	-0.03113	0.95335	23.3003	22.9575	23.213	23.0047	23.317	23.2425
Q15029-2;Q15029-3;Q15029	Q15029-2;Q15029-3;Q15029	116 kDa U5 small nuclear ribonucleoprotein component	EFTUD2	-	-	-	-	0.173527	0.682946	25.8793	25.6228	25.6577	25.5264	25.6709	25.442
Q15046;Q15046-2	Q15046;Q15046-2	Lysine--tRNA ligase	KARS	-	-	-	-	-0.04022	0.865448	26.8034	26.525	26.6424	26.7461	26.5531	26.7923
Q15056-2;Q15056	Q15056-2;Q15056	Eukaryotic translation initiation factor 4H	EIF4H	-	-	-	-	0.2788	0.372741	27.9376	27.3034	27.182	27.3249	27.4501	26.8115
Q15084-3;Q15084;Q15084-4;Q15084-5;Q15084-2	Q15084-3;Q15084;Q15084-4;Q15084-5;Q15084-2	Protein disulfide-isomerase A6	PDIA6	-	-	-	YES	0.07739	0.728758	28.7125	28.7346	28.5518	28.6964	28.5791	28.4912
Q15102	Q15102	Platelet-activating factor acetylhydrolase IB subunit gamma	PAFAH1B3	-	-	-	-	0.54369	0.270343	25.6582	26.3914	25.8362	25.9476	25.4504	24.8568
Q15121;Q15121-2	Q15121;Q15121-2	Astrocytic phosphoprotein PEA-15	PEA15	-	-	-	-	0.04171	0.942955	28.1375	27.5498	27.3044	27.7667	27.6084	27.4914
Q15149-7;Q15149-8;Q15149-9;Q15149-5;Q15149-4;Q15149-6;Q15149-3;Q15149-2;Q15149	Q15149-7;Q15149-8;Q15149-9;Q15149-5;Q15149-4;Q15149-6;Q15149-3;Q15149-2;Q15149	Plectin	PLEC	-	-	-	YES	-0.10413	0.776163	30.8777	30.6419	30.4464	30.7826	30.837	30.6587
[truncated: 137 more rows]
