# Supplementary material for: Mesenchymal stromal cell activation by breast cancer secretomes in bioengineered 3D microenvironments
Source: Life Sci Alliance. 2019 Jun 3;2(3):e201900304. doi: 10.26508/lsa.201900304 (PMC6549139; doi:10.26508/lsa.201900304)
Supplement: Supplementary file 7 [file LSA-2019-00304_TableS6.xlsx]

## Sheet: Supplementary Table 6a
Supplementary Table 6 - RNA sequencing of MSC responses to breast cancer secretomes
MCF7 vs SFM
Gene Identifiers	mean normalised counts, averaged over all samples from both conditions	log2(MCF-7/SFM)	standard error (log2(MCF-7/SFM)	Wald statistic	p value	p value (adjusted for multiple testing with the Benjamini-Hochberg procedure)
ETNK2	30.8787	0.170037	0.0538485	-3.1577	0.00159022	0.999901
KIF21A	89.3376	-0.170523	0.0631588	2.6999	0.00693596	0.999901
GPC2	30.6506	0.141553	0.0526555	-2.68828	0.00718218	0.999901
TICRR	33.5844	0.136536	0.0530214	-2.57511	0.0100209	0.999901
PTGIR	67.1849	0.149156	0.059466	-2.50826	0.0121329	0.999901
SLC16A3	1554.72	0.126069	0.0504689	-2.49795	0.0124913	0.999901
MCF2	1.84678	0.0376317	0.0151745	-2.47993	0.0131408	0.999901
STK16	233.817	0.161186	0.0667764	-2.41382	0.0157862	0.999901
HOXC9	92.0668	-0.141375	0.0612806	2.30702	0.0210537	0.999901
ZNF443	18.0762	-0.0948672	0.0415627	2.28251	0.0224594	0.999901
ZNF483	16.6498	0.0948951	0.0416744	-2.27706	0.0227827	0.999901
ID2-AS1	9.22395	-0.0774511	0.0341296	2.26933	0.0232486	0.999901
GPKOW	181.967	0.149291	0.066872	-2.23249	0.0255828	0.999901
ATP8B3	21.6219	0.104079	0.0467744	-2.22514	0.0260719	0.999901
TGFBI	15008.5	0.140429	0.0631165	-2.22491	0.0260871	0.999901
MMEL1	54.6894	0.137727	0.0621258	-2.21691	0.0266291	0.999901
MIRLET7BHG	67.0816	0.138111	0.0630524	-2.19042	0.028494	0.999901
KIF7	325.28	-0.142319	0.0650852	2.18665	0.0287678	0.999901
DHTKD1	228.958	-0.143946	0.0662809	2.17175	0.0298744	0.999901
PGK1	2362.9	0.113473	0.0522684	-2.17098	0.029933	0.999901
LYVE1	3.0519	0.0427049	0.0197518	-2.16208	0.0306121	0.999901
ROS1	3.7926	0.0507722	0.0235422	-2.15665	0.0310328	0.999901
FRMD6-AS1	8.20338	0.0721309	0.0336574	-2.14309	0.0321057	0.999901
ZFP36L2	1979.18	-0.126205	0.0590197	2.13836	0.0324878	0.999901
NDUFA6-AS1	22.2087	-0.100977	0.0475567	2.12331	0.0337283	0.999901
MSX2	14.6976	-0.0909666	0.0432114	2.10515	0.035278	0.999901
RASSF9	91.2049	-0.126143	0.0600333	2.10121	0.0356223	0.999901
PNMA6A	2.72195	0.0412798	0.0196904	-2.09644	0.036043	0.999901
LINC00865	20.4932	0.0927918	0.0446911	-2.07629	0.037867	0.999901
LOC100132111	2.41674	0.036903	0.0179145	-2.05996	0.0394027	0.999901
MITD1	122.146	0.135429	0.0657897	-2.05852	0.0395404	0.999901
TDRP	157.57	0.13834	0.0672445	-2.05727	0.0396606	0.999901
CYP2B7P	8.25425	-0.0629172	0.0308214	2.04135	0.0412162	0.999901
RBMS3-AS3	2.71159	-0.0401546	0.0196772	2.04067	0.0412839	0.999901
REEP6	43.5036	0.115889	0.0568213	-2.03953	0.0413967	0.999901
SIDT1	2.59755	0.0346525	0.0171005	-2.0264	0.0427238	0.999901
FBXW9	113.882	-0.135386	0.0669095	2.02342	0.0430294	0.999901
TTC21B	225.1	-0.13433	0.0669961	2.00504	0.044959	0.999901
LRRCC1	88.2535	0.123887	0.0620545	-1.99642	0.0458879	0.999901
PODXL2	28.9115	0.107735	0.054297	-1.98418	0.0472354	0.999901
YAE1D1	84.745	-0.130561	0.0660501	1.9767	0.0480759	0.999901
HYAL1	9.26344	0.0626486	0.0317916	-1.9706	0.0487693	0.999901
CCDC64	1.90738	-0.0328463	0.0167283	1.96352	0.0495853	0.999901
LOC283440	2.1361	0.0354339	0.0181493	-1.95235	0.0508963	0.999901
PAF1	558.9	-0.116832	0.0598487	1.95213	0.0509233	0.999901
MYPN	3.65969	0.038878	0.019938	-1.94994	0.0511829	0.999901
CORO2A	4.63561	0.0405592	0.0208419	-1.94605	0.0516492	0.999901
PRSS3	9.3225	0.0615927	0.0316859	-1.94385	0.0519135	0.999901
FOXG1	2.49221	-0.0338237	0.0174723	1.93585	0.0528866	0.999901
PRKD1	269.559	0.130127	0.0672781	-1.93417	0.0530928	0.999901
CRNKL1	299.811	-0.127066	0.0658102	1.9308	0.0535077	0.999901
SLC6A7	2.27728	0.0339429	0.0175931	-1.92933	0.0536893	0.999901
UXT-AS1	130.302	-0.129782	0.0672744	1.92915	0.0537124	0.999901
LOC101929340	1.94584	0.0305775	0.015854	-1.9287	0.0537686	0.999901
ZNRF2P2	6.583	-0.0582851	0.0302338	1.92782	0.0538781	0.999901
NIPBL-AS1	138.85	-0.129478	0.0672717	1.92471	0.054266	0.999901
SMG1P1	44.9654	0.10286	0.0534566	-1.92419	0.0543313	0.999901
CCRL2	2.70895	0.0311178	0.0161865	-1.92246	0.0545483	0.999901
NIFK-AS1	142.704	-0.128056	0.0670432	1.91006	0.0561255	0.999901
ZNF92	131.385	-0.125753	0.0661096	1.90219	0.0571458	0.999901
MAPK8	287.671	-0.126259	0.0663813	1.90203	0.0571672	0.999901
CD72	21.8021	0.0901688	0.047971	-1.87965	0.0601556	0.999901
SLC4A1AP	245.474	0.124153	0.0662123	-1.87507	0.0607828	0.999901
GBA2	472.676	-0.118633	0.0634501	1.86971	0.0615243	0.999901
RPS10	4.6529	0.0504758	0.0270594	-1.86537	0.0621298	0.999901
GOLT1B	638.049	-0.111385	0.0597601	1.86388	0.062339	0.999901
GRB7	0.857699	0.0213872	0.0114887	-1.86158	0.0626624	0.999901
ATG4C	141.521	-0.124182	0.0670147	1.85306	0.0638744	0.999901
ZNF594	56.2764	-0.115602	0.0624612	1.85078	0.0642015	0.999901
SNORA53	2.02844	-0.0325652	0.0177413	1.83556	0.0664225	0.999901
IL12A	10.7543	-0.056672	0.0308908	1.83459	0.0665668	0.999901
TTC39A	6.6256	-0.0478062	0.0260801	1.83305	0.0667946	0.999901
ZNF236	267.701	0.118927	0.0649347	-1.83149	0.0670278	0.999901
LINC00622	11.5711	-0.0623134	0.0340498	1.83007	0.0672402	0.999901
SYNPO2L	0.847892	-0.0208928	0.0114183	1.82976	0.067286	0.999901
PTRH1	95.2784	0.117067	0.0641011	-1.82628	0.0678076	0.999901
TECR	374.237	0.120897	0.0662591	-1.82461	0.0680594	0.999901
PCDH12	18.1818	-0.0781584	0.0429037	1.82171	0.0684983	0.999901
METTL1	84.9377	0.117279	0.064731	-1.8118	0.0700177	0.999901
SLC36A1	253.23	-0.120679	0.0667855	1.80696	0.0707686	0.999901
SLC46A1	322.64	0.121507	0.0672629	-1.80644	0.0708494	0.999901
MKLN1-AS	22.1303	-0.0846657	0.0469538	1.80317	0.0713615	0.999901
MIR6845	2.37255	-0.0348579	0.0193451	1.8019	0.0715607	0.999901
TTC9C	139.214	0.119412	0.0663328	-1.80019	0.0718304	0.999901
ADNP-AS1	26.5114	-0.0896624	0.0498173	1.79982	0.0718883	0.999901
MAOB	27.8977	0.0675247	0.037626	-1.79463	0.0727125	0.999901
TIGD7	85.9265	-0.116061	0.064775	1.79175	0.0731728	0.999901
SLC7A5P1	5.10644	0.0503643	0.0281114	-1.7916	0.0731973	0.999901
RAB33A	5.97767	-0.0520257	0.0290632	1.79009	0.0734398	0.999901
ZC3H3	256.208	0.12026	0.0672255	-1.78891	0.0736299	0.999901
NQO1	2613.35	-0.116849	0.0657573	1.77697	0.0755725	0.999901
INAFM2	147.968	-0.119536	0.0672793	1.77672	0.0756147	0.999901
EXOSC8	143.759	0.119286	0.067246	-1.77388	0.076083	0.999901
C10orf67	1.28696	0.0236789	0.0133554	-1.77299	0.0762307	0.999901
TET1	57.8163	-0.110086	0.0621225	1.77209	0.0763804	0.999901
C16orf95	21.7451	-0.0864353	0.0487893	1.7716	0.0764603	0.999901
LINC01058	0.742782	0.019381	0.0109417	-1.7713	0.0765113	0.999901
TIMP3	19055.5	-0.0926146	0.0523454	1.7693	0.0768444	0.999901
OMG	2.2849	0.032487	0.0184028	-1.76533	0.0775077	0.999901
CDK15	6.64001	0.0546458	0.0310819	-1.75812	0.0787266	0.999901
CCDC74A	169.36	-0.117418	0.0668542	1.75633	0.0790328	0.999901
SEMA4B	351.31	0.11631	0.0664739	-1.74971	0.0801689	0.999901
FAAHP1	1.64701	-0.0266265	0.01523	1.74829	0.0804134	0.999901
DNAJC27	95.3619	0.112981	0.0646873	-1.74658	0.0807105	0.999901
ZBTB10	239.704	-0.117417	0.067279	1.74523	0.0809445	0.999901
MRAP	35.768	-0.0923999	0.0529889	1.74376	0.0812008	0.999901
TMEM72-AS1	1.33733	0.0231207	0.0132713	-1.74215	0.0814814	0.999901
SNORD25	5.29293	0.0458418	0.0263356	-1.74068	0.0817406	0.999901
SHE	0.719473	-0.0189229	0.0108752	1.74	0.0818582	0.999901
NR2C2AP	123.429	0.115365	0.0663604	-1.73847	0.0821288	0.999901
LOC100507577	218.525	-0.114817	0.0662014	1.73435	0.0828553	0.999901
DNAJC14	397.356	-0.112405	0.0650556	1.72784	0.0840172	0.999901
NPHP3-AS1	10.2281	-0.0646127	0.0374072	1.72728	0.0841179	0.999901
FKBP1B	26.408	-0.0906021	0.0524906	1.72606	0.0843359	0.999901
AAGAB	341.258	-0.115227	0.0668328	1.72411	0.0846888	0.999901
C1RL-AS1	250.358	0.112522	0.0653304	-1.72235	0.0850058	0.999901
THAP11	282.919	-0.110639	0.064277	1.72129	0.0851982	0.999901
MIR5095	4.03659	-0.041701	0.0242337	1.72079	0.0852897	0.999901
LOC101929295	4.80989	0.0373713	0.0217422	-1.71884	0.0856434	0.999901
MRPS30	176.92	-0.115411	0.0671674	1.71826	0.0857488	0.999901
WDR89	81.8024	-0.106681	0.0622224	1.71451	0.0864343	0.999901
ABHD12	398.466	0.106593	0.0622539	-1.71223	0.0868549	0.999901
DAK	230.807	0.114678	0.0669893	-1.71189	0.0869169	0.999901
PICK1	125.644	0.107561	0.0629445	-1.70883	0.0874826	0.999901
PTPN3	69.237	0.0948497	0.0555193	-1.70841	0.0875604	0.999901
LOC100129534	12.3438	0.0564526	0.0330678	-1.70718	0.0877885	0.999901
NTAN1	475.118	-0.112305	0.0658793	1.70471	0.0882481	0.999901
DECR2	157.277	0.112221	0.0659406	-1.70185	0.0887827	0.999901
ZFP36	6397.28	-0.112414	0.0662028	1.69802	0.0895034	0.999901
HOXA2	23.1927	-0.071677	0.0422238	1.69755	0.0895928	0.999901
SLC25A29	348.435	0.112335	0.0662238	-1.6963	0.0898292	0.999901
RRN3P1	57.1817	-0.10105	0.0596926	1.69283	0.090487	0.999901
DEFB109P1	2.29494	0.0297761	0.0175904	-1.69275	0.0905022	0.999901
GRIPAP1	392.882	0.106963	0.0631906	-1.69271	0.0905116	0.999901
DKFZP434I0714	18.1121	-0.0735449	0.0434582	1.69231	0.0905863	0.999901
OXCT1-AS1	47.5865	0.10311	0.0609941	-1.69049	0.0909349	0.999901
URB2	138.116	-0.112566	0.0666507	1.6889	0.0912384	0.999901
SGK494	49.346	-0.0957133	0.0568102	1.68479	0.0920288	0.999901
GALNT2	2463.21	0.0847212	0.0503116	-1.68393	0.0921952	0.999901
CRY1	228.264	0.112855	0.0670596	-1.6829	0.0923946	0.999901
USP31	153.63	0.113211	0.0672739	-1.68284	0.0924059	0.999901
PROZ	1.09373	0.0220813	0.0131247	-1.68242	0.0924883	0.999901
PORCN	116.046	0.111005	0.0659936	-1.68205	0.0925585	0.999901
ST3GAL5	481.573	-0.112057	0.066804	1.6774	0.093464	0.999901
LMBRD2	153.266	-0.112653	0.0671776	1.67694	0.0935537	0.999901
GOLGA6A	1.13188	0.021919	0.0130844	-1.6752	0.0938951	0.999901
AGAP9	16.8267	0.0666828	0.0398424	-1.67366	0.0941967	0.999901
RNU86	5.07356	0.0358141	0.0214127	-1.67256	0.0944136	0.999901
ABI1	628.817	-0.0968925	0.057934	1.67246	0.0944331	0.999901
PIP5K1P1	2.58301	0.031443	0.0188043	-1.67212	0.0945014	0.999901
HAS2-AS1	69.8241	0.093832	0.0561172	-1.67207	0.0945101	0.999901
FBXW10	1.54008	-0.0252253	0.0151059	1.6699	0.0949383	0.999901
YY1	869.333	0.0899494	0.053959	-1.667	0.0955151	0.999901
LOC653513	6.79217	0.0530275	0.0318244	-1.66625	0.0956633	0.999901
DAPL1	3.2027	-0.0266543	0.0160118	1.66467	0.0959787	0.999901
CCDC28B	65.4954	0.104919	0.0631058	-1.66259	0.0963951	0.999901
ZNF192P1	9.72304	0.0588757	0.0354136	-1.66252	0.0964092	0.999901
BEAN1	6.16847	-0.0365228	0.0219709	1.66233	0.0964473	0.999901
EDRF1-AS1	20.9212	-0.0800845	0.0481977	1.66158	0.0965963	0.999901
SNORD110	5.42843	-0.0394581	0.0238141	1.65692	0.0975351	0.999901
SNORD116-2	1.0377	-0.0170265	0.0103048	1.65229	0.0984749	0.999901
SLC25A22	200.415	0.109012	0.0662166	-1.64629	0.0997034	0.999901
KIF5C	6.75877	0.0381589	0.0231849	-1.64585	0.0997938	0.999901
P4HA1	1781.57	0.106696	0.0648715	-1.64473	0.100026	0.999901
PSMD7	658.082	-0.0958746	0.0583996	1.6417	0.100652	0.999901
DSCR9	3.14722	0.0361425	0.0220258	-1.64092	0.100814	0.999901
PHF19	263.184	0.10818	0.065985	-1.63946	0.101117	0.999901
LONRF2	1.15769	0.0214234	0.0130876	-1.63692	0.101648	0.999901
ADD2	0.642454	0.0165584	0.0101208	-1.63608	0.101824	0.999901
METTL21EP	0.642454	0.0165584	0.0101208	-1.63608	0.101824	0.999901
ZNF613	29.8866	0.0865052	0.0529387	-1.63406	0.102245	0.999901
OAS1	34.4433	-0.0637133	0.0389918	1.63402	0.102255	0.999901
MARS2	36.267	-0.0807888	0.0494592	1.63344	0.102376	0.999901
CACNB4	5.44817	-0.0434868	0.0266524	1.63163	0.102758	0.999901
DLEU7	0.869131	0.0164642	0.0100963	-1.63071	0.102951	0.999901
H2AFY2	205.497	0.108107	0.0663574	-1.62916	0.103278	0.999901
KIAA1279	378.115	-0.101428	0.0623364	1.6271	0.103716	0.999901
COX6A1	394.256	-0.103469	0.063674	1.62498	0.104168	0.999901
LINC01340	1.10838	0.0206785	0.0127309	-1.62428	0.104317	0.999901
KDM4A-AS1	78.4105	0.104931	0.0646704	-1.62255	0.104685	0.999901
PCP4L1	5.20401	0.0359288	0.0222263	-1.6165	0.105986	0.999901
LINC00565	52.6829	0.0900954	0.0558884	-1.61206	0.106949	0.999901
ZNF41	120.43	-0.106147	0.0659089	1.61051	0.107287	0.999901
DPF1	11.9883	-0.0526245	0.0326954	1.60954	0.107499	0.999901
EHMT1-IT1	0.628532	-0.0161809	0.0100637	1.60785	0.107868	0.999901
SNORD72	0.628532	-0.0161809	0.0100637	1.60785	0.107868	0.999901
LRRIQ3	2.84958	0.0322477	0.020081	-1.60588	0.1083	0.999901
AASDHPPT	328.136	-0.105706	0.0659639	1.60249	0.109048	0.999901
TAS2R4	1.84732	0.0264073	0.0164822	-1.60217	0.109118	0.999901
DCDC2B	24.8435	0.0817752	0.0510689	-1.60127	0.109317	0.999901
MRPS7	208.67	-0.105319	0.0657989	1.60062	0.109462	0.999901
EMC6	163.799	0.107613	0.0672681	-1.59976	0.109653	0.999901
NAA25	266.916	0.106469	0.0665672	-1.59943	0.109725	0.999901
C7orf43	157.923	-0.107362	0.0671849	1.598	0.110043	0.999901
CC2D2B	1.72348	0.0270394	0.0169244	-1.59766	0.110119	0.999901
RPS17	703.019	0.106616	0.0668167	-1.59565	0.110567	0.999901
SLC22A1	3.4185	-0.036901	0.0231419	1.59455	0.110812	0.999901
RNA45S5	38681.3	0.0925356	0.058068	-1.59357	0.111032	0.999901
GPR56	11.553	0.051781	0.0325326	-1.59166	0.111461	0.999901
CBLL1	217.544	-0.106027	0.0666533	1.59073	0.111671	0.999901
ZCCHC3	290.165	-0.106865	0.0671916	1.59045	0.111734	0.999901
ALMS1-IT1	1.38064	0.0186581	0.0117568	-1.58701	0.112511	0.999901
SGCA	4.50423	-0.0320044	0.0201746	1.58637	0.112655	0.999901
CPA1	1.55338	0.0227821	0.0143894	-1.58326	0.113362	0.999901
NRIP2	27.404	-0.083255	0.0526633	1.58089	0.113902	0.999901
FAM118B	199.764	-0.106328	0.0672648	1.58073	0.113939	0.999901
SNORA68	1.68371	-0.0226634	0.0143541	1.57888	0.114364	0.999901
FAM171A1	422.602	0.0991093	0.0628673	-1.57648	0.114914	0.999901
RNF212B	11.9481	-0.0630772	0.0400292	1.57578	0.115076	0.999901
RWDD1	470.604	-0.0968059	0.0616437	1.57041	0.116319	0.999901
RBM24	4.12693	-0.0374929	0.0238986	1.56883	0.116687	0.999901
TH	0.981486	-0.0153196	0.00977767	1.56679	0.117163	0.999901
TMEM147-AS1	183.795	-0.104864	0.0670552	1.56385	0.117852	0.999901
FOXQ1	76.9205	-0.0861541	0.0550943	1.56376	0.117874	0.999901
LOC254896	0.993399	0.0196573	0.0125832	-1.56218	0.118245	0.999901
MIR4656	0.993399	0.0196573	0.0125832	-1.56218	0.118245	0.999901
DNM3	23.5801	-0.0712497	0.0456437	1.561	0.118525	0.999901
PPP1R1B	4.6934	0.0393083	0.0251862	-1.56071	0.118592	0.999901
PFDN1	409.236	-0.0953802	0.0611142	1.56069	0.118597	0.999901
SNORD12	5.35519	-0.0415129	0.0266003	1.56062	0.118614	0.999901
SETDB1	300.22	0.0982917	0.062993	-1.56036	0.118675	0.999901
TARS2	182.221	0.102958	0.0660798	-1.55808	0.119214	0.999901
HERC2P10	4.56746	-0.038371	0.0246622	1.55586	0.119741	0.999901
WDR59	306.012	0.102127	0.0656405	-1.55586	0.119743	0.999901
PEX11A	79.488	-0.095845	0.0616212	1.55539	0.119853	0.999901
SS18L2	87.1651	-0.0947118	0.0609011	1.55517	0.119904	0.999901
MIR6732	0.899926	0.0149823	0.00963645	-1.55476	0.120004	0.999901
MAP3K15	71.9126	-0.0956441	0.0615993	1.55268	0.1205	0.999901
SETD4	179.694	-0.10432	0.0671976	1.55243	0.120558	0.999901
PGM5P2	14.5846	-0.0633574	0.040841	1.55132	0.120825	0.999901
TYSND1	132.835	0.098529	0.0636375	-1.54828	0.121554	0.999901
UBE2A	762.684	-0.0847332	0.0547356	1.54804	0.121612	0.999901
SLC23A1	5.69446	0.0425163	0.0274684	-1.54783	0.121664	0.999901
ZNF620	9.58439	-0.0510492	0.0329814	1.54782	0.121665	0.999901
TTLL13	2.77073	-0.0322674	0.020851	1.54752	0.121738	0.999901
C2orf49	258.304	-0.101297	0.065497	1.54659	0.121963	0.999901
FBXO33	316.801	-0.103172	0.0667197	1.54635	0.122019	0.999901
MIR23A	12.4286	0.0573857	0.0371477	-1.5448	0.122395	0.999901
TACSTD2	5.7469	-0.041822	0.0271464	1.54061	0.123411	0.999901
CLCN5	151.641	-0.10158	0.0659378	1.54054	0.12343	0.999901
LOC101929224	2.47575	0.0246656	0.016012	-1.54045	0.123451	0.999901
NR1D1	262.711	-0.0993131	0.0645773	1.5379	0.124074	0.999901
LOH12CR1	86.1222	-0.101683	0.0661299	1.53762	0.124141	0.999901
CD320	346.005	0.10335	0.0672317	-1.53723	0.124238	0.999901
KRAS	474.187	-0.094954	0.0619403	1.53299	0.125278	0.999901
C9orf91	121.426	-0.102072	0.0666167	1.53223	0.125467	0.999901
C6orf132	20.4161	0.0703734	0.0459343	-1.53205	0.125511	0.999901
LINC00941	21.6124	0.0741326	0.0484385	-1.53045	0.125906	0.999901
SCN2B	0.964901	-0.0191746	0.0125323	1.53001	0.126014	0.999901
RIBC1	7.93162	0.0448964	0.029378	-1.52823	0.126456	0.999901
PPP1R3E	68.6849	-0.096098	0.0629036	1.5277	0.126586	0.999901
PTGS1	70.1997	0.0778459	0.0509884	-1.52674	0.126826	0.999901
CSNK2A2	260.358	0.10128	0.066379	-1.52578	0.127065	0.999901
MREG	20.4449	0.0725591	0.0475801	-1.52499	0.127262	0.999901
ACTL10	8.05773	-0.0482597	0.0316469	1.52494	0.127274	0.999901
APOLD1	77.7932	-0.0910254	0.0597139	1.52436	0.127419	0.999901
ILKAP	179.938	-0.102435	0.0672134	1.52403	0.127501	0.999901
NUP43	302.299	-0.10011	0.065752	1.52254	0.127875	0.999901
PLCL2	57.7915	0.0851571	0.0559421	-1.52224	0.12795	0.999901
METTL10	144.315	0.101986	0.0670713	-1.52055	0.128372	0.999901
INTS7	175.851	0.101866	0.0669991	-1.5204	0.128409	0.999901
MID1	634.259	0.102119	0.0672244	-1.51908	0.128742	0.999901
MIIP	151.154	0.102146	0.0672669	-1.51851	0.128885	0.999901
GRM4	4.35245	-0.0315006	0.0207444	1.51851	0.128885	0.999901
SYNJ2-IT1	1.69037	0.0200563	0.0132333	-1.51559	0.129623	0.999901
TMEM104	367.837	-0.100534	0.0663395	1.51546	0.129657	0.999901
COX10-AS1	57.2863	-0.093143	0.061468	1.51531	0.129694	0.999901
AGMO	6.26295	-0.0471307	0.0311143	1.51476	0.129833	0.999901
ATAD1	669.537	-0.0922161	0.0610599	1.51026	0.130978	0.999901
YY1AP1	425.532	0.0891469	0.0591002	-1.5084	0.131452	0.999901
ARMCX3	1532.03	-0.0729465	0.0483803	1.50777	0.131613	0.999901
MARK2P9	1.39126	0.021869	0.0145106	-1.5071	0.131785	0.999901
CLCN6	330.193	-0.100941	0.0670563	1.50532	0.132243	0.999901
PLEKHA5	951.6	0.0928574	0.0617023	-1.50493	0.132343	0.999901
MYL4	0.964927	0.0184306	0.0122564	-1.50375	0.132647	0.999901
ACRV1	0.724056	0.0139905	0.00931329	-1.5022	0.133045	0.999901
SLC25A15	96.9063	0.097566	0.0649508	-1.50215	0.133058	0.999901
DLK2	13.2753	-0.0622329	0.0414353	1.50193	0.133115	0.999901
MAGI1-AS1	0.719019	0.0139796	0.00930968	-1.50162	0.133195	0.999901
OR1L8	0.714244	0.0139693	0.00930622	-1.50107	0.133338	0.999901
ST20-AS1	62.9595	0.0919017	0.0612934	-1.49937	0.133777	0.999901
RAVER1	675.148	0.0844924	0.0564049	-1.49796	0.134143	0.999901
PIK3CD-AS2	3.27368	0.0343053	0.0229173	-1.49692	0.134414	0.999901
GPR158	0.506293	0.0138715	0.00926882	-1.49658	0.134502	0.999901
SFTPB	0.506293	0.0138715	0.00926882	-1.49658	0.134502	0.999901
SMC2	279.064	0.0965099	0.0644901	-1.49651	0.134521	0.999901
PAQR7	257.207	-0.0975589	0.0651957	1.4964	0.134549	0.999901
ACHE	3.34766	0.0291651	0.0194912	-1.49632	0.134569	0.999901
ACCS	149.598	0.0974804	0.0651757	-1.49566	0.134743	0.999901
DNAH12	3.15054	-0.0319579	0.021382	1.49462	0.135013	0.999901
WDR74	161.386	0.100501	0.0672431	-1.4946	0.13502	0.999901
GART	632.627	0.0822354	0.0550334	-1.49428	0.135102	0.999901
MIR3934	2.55977	-0.0264626	0.0177487	1.49096	0.135971	0.999901
KIF9	67.6584	-0.0883645	0.0593462	1.48896	0.136497	0.999901
LINC00959	34.2619	-0.0824847	0.0554679	1.48707	0.136997	0.999901
PRICKLE2-AS2	0.785078	-0.0138116	0.00929158	1.48647	0.137156	0.999901
ANP32A-IT1	6.49775	0.043853	0.0295132	-1.48588	0.137312	0.999901
MBL1P	1.41865	0.0199452	0.013426	-1.48557	0.137393	0.999901
PCDHA10	1.35087	-0.0215176	0.0144887	1.48513	0.137511	0.999901
ZNF137P	33.5639	0.0734944	0.049507	-1.48452	0.13767	0.999901
MYCBP	0.986377	-0.0186222	0.0125483	1.48405	0.137797	0.999901
ZNF330	216.804	-0.0968195	0.065283	1.48307	0.138055	0.999901
SDR42E1	2.31162	0.0238584	0.0160949	-1.48236	0.138244	0.999901
SLC45A4	99.17	0.0985207	0.0665034	-1.48144	0.13849	0.999901
CREBL2	700.572	-0.0946359	0.0639245	1.48043	0.138758	0.999901
MTHFD2L	27.5048	-0.0781756	0.0528193	1.48006	0.138858	0.999901
LOC101927768	2.81973	-0.0291294	0.0197078	1.47807	0.13939	0.999901
IGFALS	1.32526	-0.0214854	0.0145382	1.47786	0.139446	0.999901
ITGB7	15.6078	-0.0541155	0.03663	1.47736	0.13958	0.999901
GDF5	582.649	0.0978785	0.0662694	-1.47698	0.139682	0.999901
PSMD9	420.33	0.088316	0.0598603	-1.47537	0.140114	0.999901
SDSL	45.7587	-0.0799531	0.054193	1.47534	0.140121	0.999901
RIN1	694.833	0.0808646	0.054864	-1.47391	0.140506	0.999901
CDK11B	205.159	0.0986853	0.0670376	-1.47209	0.140997	0.999901
RBM4	380.17	0.0973418	0.0661399	-1.47176	0.141087	0.999901
LINC00702	2.72738	-0.0207374	0.0140985	1.4709	0.141319	0.999901
PHACTR1	8.67664	-0.0488758	0.0332363	1.47056	0.141411	0.999901
LOC101060542	0.49527	-0.0135513	0.00921806	1.47008	0.141539	0.999901
ZNF584	108.846	-0.0975005	0.0663704	1.46904	0.141823	0.999901
TM2D1	266.121	-0.0978968	0.0667	1.46772	0.142181	0.999901
PSMA1	753.176	-0.0910222	0.0620224	1.46757	0.142222	0.999901
RBM10	530.608	0.0877834	0.0598279	-1.46727	0.142304	0.999901
TIMM23B	79.6711	0.0893131	0.0609271	-1.4659	0.142675	0.999901
GPR20	1.02446	0.0171679	0.0117247	-1.46426	0.143123	0.999901
CKS2	142.328	0.0975997	0.0666705	-1.46391	0.143218	0.999901
ACOT9	295.442	-0.0982447	0.0671416	1.46324	0.1434	0.999901
SNORD116-22	0.913796	-0.0133702	0.0091386	1.46304	0.143455	0.999901
BCAM	112.17	0.0735057	0.0502462	-1.46291	0.143492	0.999901
ING3	125.43	-0.0981047	0.0670662	1.4628	0.143521	0.999901
KRTAP2-3	2.50836	-0.0265374	0.0181572	1.46153	0.143869	0.999901
UBLCP1	418.412	-0.0877303	0.0600314	1.46141	0.143904	0.999901
ARMCX2	1045.49	0.0741821	0.0508032	-1.46019	0.144239	0.999901
LOC100132077	8.92712	0.04949	0.0339268	-1.45873	0.144639	0.999901
PXYLP1	110.149	-0.0926693	0.0635361	1.45853	0.144694	0.999901
MYCL	1.42984	0.0201207	0.0138355	-1.45428	0.14587	0.999901
LYPD3	9.36717	0.0502232	0.0345397	-1.45407	0.145926	0.999901
FER1L6-AS2	4.84472	-0.0272572	0.0187472	1.45393	0.145966	0.999901
LOC344967	9.59615	0.0509285	0.0350389	-1.45348	0.14609	0.999901
GRIN2C	4.90453	-0.0391142	0.0269505	1.45133	0.146687	0.999901
LINC00672	11.7816	0.0536908	0.0370021	-1.45102	0.146774	0.999901
HIST1H3E	3.0306	-0.0302308	0.0208385	1.45072	0.146857	0.999901
DLL3	1.6694	0.0220803	0.0152237	-1.45039	0.146951	0.999901
ACSBG1	7.1674	0.0425323	0.0293526	-1.44901	0.147334	0.999901
DLX4	2.15815	-0.0252833	0.0174587	1.44818	0.147566	0.999901
SMIM5	6.81955	-0.0426183	0.0294525	1.44702	0.147892	0.999901
FAM134C	476.839	0.0875924	0.0605351	-1.44697	0.147906	0.999901
TMEM86B	44.5853	0.0769421	0.0531827	-1.44675	0.147966	0.999901
CTBP1-AS	566.37	-0.0906354	0.0626591	1.44648	0.148042	0.999901
CCDC120	80.2433	-0.0912505	0.0631029	1.44606	0.14816	0.999901
SPAG5	41.5728	0.0676821	0.0468281	-1.44533	0.148365	0.999901
CDCA8	11.3459	0.0429088	0.0296979	-1.44484	0.148502	0.999901
FAM182B	2.63614	0.0245299	0.016987	-1.44404	0.148727	0.999901
CES3	4.46104	0.0319849	0.0221755	-1.44235	0.149203	0.999901
COASY	497.235	0.0917146	0.063595	-1.44217	0.149256	0.999901
LINC00570	1.18992	0.0158757	0.0110084	-1.44215	0.14926	0.999901
NXPE3	595.696	-0.0862284	0.0598181	1.44151	0.14944	0.999901
CDKL2	9.80876	-0.0458287	0.0318325	1.43968	0.149957	0.999901
LINC01135	1.36653	-0.0159826	0.0111063	1.43906	0.150134	0.999901
BIN3-IT1	5.30714	-0.0378376	0.026309	1.4382	0.150377	0.999901
OVOL3	0.993738	-0.0175252	0.0121901	1.43765	0.150533	0.999901
TECPR1	455.815	0.0940692	0.0654377	-1.43754	0.150565	0.999901
LINC01126	2.91158	-0.024804	0.0172581	1.43724	0.150651	0.999901
POLR2D	211.116	-0.0943142	0.0656562	1.43649	0.150864	0.999901
DACT3-AS1	0.663698	0.0127955	0.00890929	-1.4362	0.150945	0.999901
ENTPD6	393.449	0.0953141	0.0663829	-1.43582	0.151053	0.999901
ANKRD20A5P	3.58443	0.0327183	0.0227914	-1.43555	0.15113	0.999901
IQSEC3	3.21242	-0.0279237	0.0194542	1.43536	0.151185	0.999901
PDCL	310.065	-0.0952975	0.0664355	1.43444	0.151447	0.999901
LOC100506083	49.2396	-0.0839005	0.0586004	1.43174	0.152219	0.999901
COL9A2	17.978	-0.0523861	0.0366317	1.43007	0.152696	0.999901
AMIGO1	22.4554	0.0690647	0.048349	-1.42846	0.153159	0.999901
PXDNL	3.04507	-0.0262723	0.0183968	1.42809	0.153266	0.999901
SMC2-AS1	2.21021	0.0274812	0.0192617	-1.42673	0.153657	0.999901
C12orf79	2.3085	0.0207593	0.0145612	-1.42565	0.153969	0.999901
TAS1R1	5.56685	-0.0325559	0.0228478	1.4249	0.154185	0.999901
C18orf65	3.95301	0.0272149	0.0191071	-1.42433	0.15435	0.999901
TMEM180	24.078	0.0617926	0.0434089	-1.4235	0.154591	0.999901
GTPBP3	128.652	0.0954253	0.0672637	-1.41867	0.155994	0.999901
DDX60	200.088	-0.0953981	0.0672654	1.41823	0.156123	0.999901
SNORD42B	2.6146	-0.0295798	0.0208923	1.41582	0.156827	0.999901
ASAH2	0.651816	-0.0125201	0.00885204	1.41438	0.15725	0.999901
LOC101927550	88.6741	0.0927402	0.0655925	-1.41388	0.157396	0.999901
ATP8A2	1.28308	-0.0155854	0.0110268	1.41341	0.157534	0.999901
TMEM251	54.2706	-0.0832686	0.0590279	1.41067	0.158343	0.999901
PPP6R1	926.45	0.0796	0.0564367	-1.41043	0.158413	0.999901
CTAGE11P	0.628234	-0.0124498	0.00882779	1.41029	0.158453	0.999901
GPNMB	5840.94	-0.0926114	0.0656743	1.41016	0.158492	0.999901
ZNF252P-AS1	2.52397	0.0233867	0.0166019	-1.40868	0.15893	0.999901
NPAS2	135.985	-0.0927993	0.0659004	1.40817	0.15908	0.999901
TRAF3IP1	228.322	0.0939517	0.0667734	-1.40702	0.159421	0.999901
C4orf46	135.212	-0.0873264	0.0620928	1.40639	0.15961	0.999901
TBC1D30	7.56924	-0.0408386	0.0290489	1.40586	0.159766	0.999901
ZNF676	0.605249	-0.0123731	0.00880115	1.40585	0.159769	0.999901
LRRIQ1	9.16446	0.0467117	0.033244	-1.40512	0.159987	0.999901
DNMT3B	36.8997	0.0808244	0.057531	-1.40488	0.160056	0.999901
PRR15L	0.600406	-0.0123565	0.00879538	1.40488	0.160057	0.999901
ARRDC1-AS1	86.1272	0.0872118	0.0621295	-1.40371	0.160405	0.999901
PYY2	1.61143	0.0170326	0.0121459	-1.40233	0.160817	0.999901
ELK4	777.003	-0.0812407	0.0579443	1.40205	0.160901	0.999901
GRIA1	11.7488	-0.037742	0.0269325	1.40136	0.161108	0.999901
ITGB4	10.8614	0.0503136	0.0359501	-1.39954	0.161652	0.999901
DDA1	404.506	-0.0870763	0.0622185	1.39952	0.161656	0.999901
ST8SIA2	2.47491	0.0234239	0.0167589	-1.3977	0.162205	0.999901
MTBP	33.3036	0.0769673	0.0550824	-1.39731	0.162319	0.999901
CCDC162P	1.47743	0.0179354	0.0128485	-1.39591	0.162741	0.999901
SYDE2	62.326	-0.0773179	0.05547	1.39387	0.163357	0.999901
CA9	7.71899	0.0377684	0.0270967	-1.39384	0.163367	0.999901
ACOX3	197.554	-0.0864814	0.0620755	1.39317	0.16357	0.999901
LINC00886	20.3	0.0616028	0.0442397	-1.39248	0.163778	0.999901
PHOSPHO1	12.4657	0.0414476	0.0297771	-1.39193	0.163944	0.999901
LINC01554	1.53044	0.0177538	0.0127557	-1.39183	0.163973	0.999901
HNRNPA1	110.863	0.0929087	0.0667555	-1.39178	0.16399	0.999901
THBD	25.2036	0.0621376	0.0446476	-1.39173	0.164003	0.999901
C17orf75	107.139	-0.0935299	0.0672074	1.39166	0.164025	0.999901
LINC00994	0.637417	0.012008	0.00863309	-1.39092	0.164248	0.999901
CYC1	514.116	0.0828799	0.0595869	-1.39091	0.164253	0.999901
SNORA25	12.3405	0.0502296	0.0361456	-1.38965	0.164637	0.999901
NFE2L3	47.3082	0.0695069	0.0500314	-1.38927	0.164752	0.999901
LONP2	728.935	0.0792236	0.057028	-1.38921	0.16477	0.999901
FER	116.687	0.0913077	0.0657856	-1.38796	0.16515	0.999901
CCPG1	438.181	-0.0933113	0.0672559	1.38741	0.165318	0.999901
SLC29A4	50.2504	0.0857384	0.0617995	-1.38736	0.165331	0.999901
MEF2BNB	32.7709	0.078025	0.0562527	-1.38705	0.165428	0.999901
UBE3D	30.462	-0.0766144	0.0552379	1.38699	0.165445	0.999901
C21orf58	42.7924	0.0773476	0.0558052	-1.38603	0.165738	0.999901
PANK4	202.44	-0.0924663	0.0667276	1.38573	0.16583	0.999901
ID1	419.332	-0.0748219	0.0540059	1.38544	0.165918	0.999901
RNF215	252.438	0.0925672	0.0668825	-1.38403	0.16635	0.999901
ALB	1.30852	-0.0188536	0.0136319	1.38305	0.166649	0.999901
MIR1247	2.40112	-0.0246011	0.017801	1.38201	0.166969	0.999901
PLD5	1.15994	0.0153768	0.0111293	-1.38165	0.167081	0.999901
SLC6A4	3.48329	0.0296437	0.0214574	-1.38151	0.167121	0.999901
MRPL30	298.228	0.0885495	0.064121	-1.38098	0.167287	0.999901
ALKBH7	302.96	0.0879818	0.0637213	-1.38073	0.167363	0.999901
SLC25A45	58.5206	0.0768175	0.0556359	-1.38072	0.167366	0.999901
FRMD8P1	5.00734	-0.0264719	0.0191759	1.38048	0.16744	0.999901
CCDC9	274.675	0.0916621	0.0664225	-1.37998	0.167591	0.999901
ARFGEF1	626.213	0.0783965	0.0568102	-1.37997	0.167595	0.999901
NKPD1	2.85195	0.0290237	0.0210361	-1.37971	0.167677	0.999901
SLC35E3	150.986	-0.0927142	0.0672695	1.37825	0.168126	0.999901
HIPK4	6.18856	-0.0419213	0.0304168	1.37823	0.168133	0.999901
PET117	2.25423	-0.0267936	0.0194422	1.37812	0.168166	0.999901
UQCC3	105.263	0.0923256	0.0670425	-1.37712	0.168475	0.999901
LINC01232	6.61599	0.0352876	0.0256256	-1.37705	0.168498	0.999901
SLC7A7	46.8883	-0.0842528	0.061187	1.37697	0.16852	0.999901
CHRM5	0.661202	-0.0118589	0.00861507	1.37653	0.168659	0.999901
LOC286437	71.6078	-0.088127	0.0640495	1.37592	0.168846	0.999901
ABHD1	10.1999	0.0471374	0.0343373	-1.37278	0.169822	0.999901
HILPDA	73.5661	-0.0869922	0.0633974	1.37217	0.17001	0.999901
LOC642423	4.01555	0.0342589	0.0249707	-1.37196	0.170075	0.999901
POLR3GL	191.162	0.0922102	0.0672676	-1.3708	0.170438	0.999901
DDX20	182.282	-0.0920428	0.0671761	1.37017	0.170633	0.999901
ZMYM5	207.106	-0.0921518	0.0672695	1.36989	0.170722	0.999901
TMEM41A	156.869	-0.0921417	0.0672736	1.36966	0.170794	0.999901
ZNF681	14.9062	0.0590579	0.0431406	-1.36897	0.17101	0.999901
RPL21P44	3.92551	0.025186	0.0184087	-1.36816	0.171264	0.999901
LIPJ	0.614635	-0.0117166	0.00856442	1.36805	0.171295	0.999901
MIR1245B	0.614635	-0.0117166	0.00856442	1.36805	0.171295	0.999901
TRMT44	78.0826	-0.0900269	0.0658229	1.36771	0.171402	0.999901
ZNF197-AS1	2.59783	-0.0273681	0.0200139	1.36746	0.171482	0.999901
TLE6	5.30531	-0.0343779	0.0251412	1.36739	0.171502	0.999901
IDI2	28.9939	0.0673897	0.049284	-1.36738	0.171507	0.999901
HSD11B2	2.94505	0.0267486	0.0195718	-1.36669	0.171722	0.999901
GAL3ST3	1.26758	0.0183553	0.0134338	-1.36635	0.171828	0.999901
KHK	19.9571	0.0633004	0.0463473	-1.36578	0.172007	0.999901
SPNS2	146.814	-0.0905112	0.0662776	1.36564	0.172053	0.999901
MYO5C	4.94708	0.0301122	0.0220573	-1.36518	0.172197	0.999901
ZNF446	111.975	-0.0905378	0.0663306	1.36495	0.172269	0.999901
LINC00539	3.60953	0.0247067	0.0181103	-1.36424	0.172493	0.999901
ZNF790	46.1187	0.0717882	0.0526222	-1.36422	0.172499	0.999901
CD19	0.845835	-0.0159688	0.0117073	1.36401	0.172564	0.999901
PCCA-AS1	1.60583	-0.0215952	0.0158404	1.3633	0.172789	0.999901
SNORD77	0.591053	-0.0116334	0.00853457	1.36309	0.172854	0.999901
MCM3	269.785	0.0886796	0.065066	-1.36292	0.172908	0.999901
DHRS4	173.259	0.0904637	0.0664251	-1.36189	0.173233	0.999901
CFAP43	9.82101	0.0453863	0.0333276	-1.36182	0.173254	0.999901
ARG2	381.103	-0.0873669	0.0641721	1.36145	0.173373	0.999901
TRMT1	334.59	0.086244	0.0633736	-1.36088	0.173551	0.999901
ARHGEF38	0.576824	-0.0115775	0.00851445	1.35975	0.173908	0.999901
GORASP1	403.946	0.0893189	0.0656984	-1.35953	0.173979	0.999901
LOC101927196	0.827095	-0.0159097	0.0117112	1.35851	0.174302	0.999901
LMLN-AS1	44.7442	0.0802149	0.0590504	-1.35841	0.174332	0.999901
GDPD1	23.5975	0.0613604	0.0451745	-1.3583	0.174369	0.999901
MAMSTR	21.9974	0.0583517	0.0429597	-1.35829	0.174372	0.999901
SGPP2	1.42575	0.0167707	0.0123477	-1.35821	0.174398	0.999901
RGPD1	10.2552	0.0390854	0.0287778	-1.35818	0.174407	0.999901
CTAGE7P	5.93346	-0.0392353	0.0289037	1.35745	0.174639	0.999901
LRRC69	5.7815	0.0306562	0.0225895	-1.3571	0.174749	0.999901
DHX58	131.913	-0.0881714	0.0650368	1.35572	0.17519	0.999901
NARF	306.121	0.083711	0.0617541	-1.35555	0.175241	0.999901
SMYD4	162.148	-0.0907648	0.0670647	1.35339	0.17593	0.999901
KLF2	1096.48	-0.0880122	0.0650384	1.35323	0.175981	0.999901
CCDC86	223.381	-0.0910119	0.067279	1.35275	0.176134	0.999901
ALS2CR12	7.43638	0.044233	0.0327129	-1.35216	0.176325	0.999901
RECQL4	76.5286	0.0809118	0.0598492	-1.35193	0.176398	0.999901
MIR4326	1.25306	-0.0188572	0.0139512	1.35165	0.176486	0.999901
B4GALNT2	2.6257	-0.0174098	0.0128824	1.35144	0.176555	0.999901
RGS22	5.81736	0.0313129	0.0231878	-1.35041	0.176886	0.999901
LINC01125	5.15519	-0.0355211	0.0263377	1.34868	0.17744	0.999901
ZRANB2-AS2	1.23887	-0.0188408	0.0139731	1.34837	0.17754	0.999901
S100A1	18.4034	-0.0515352	0.0382206	1.34836	0.177542	0.999901
ZNF436	396.417	0.0845921	0.0627515	-1.34805	0.177643	0.999901
ADM5	12.8147	0.0477904	0.035464	-1.34758	0.177795	0.999901
GTF3C2	474.605	0.0866374	0.0643035	-1.34732	0.177877	0.999901
RGAG1	2.54186	0.0255115	0.0189356	-1.34728	0.17789	0.999901
NR2C1	195.815	-0.0899391	0.0667662	1.34707	0.177956	0.999901
MIR181A2HG	2.34127	0.0198304	0.0147252	-1.3467	0.178076	0.999901
FBXL20	349.3	0.0896209	0.0665555	-1.34656	0.178122	0.999901
SAP30L-AS1	33.3164	0.055599	0.0413465	-1.34471	0.178719	0.999901
METTL3	363.576	-0.0836305	0.0622195	1.34412	0.17891	0.999901
ALKBH2	103.89	-0.088579	0.0659099	1.34394	0.178967	0.999901
MAML3	143.529	0.088816	0.0660966	-1.34373	0.179036	0.999901
TUBA8	11.2652	-0.0525481	0.0391305	1.34289	0.179306	0.999901
SNRK-AS1	182.837	-0.08994	0.066982	1.34275	0.179353	0.999901
SLC25A5-AS1	260.983	-0.087811	0.0655281	1.34005	0.180229	0.999901
SP2	268.611	-0.0899419	0.0671548	1.33932	0.180466	0.999901
NAT6	46.9044	0.0816524	0.0609784	-1.33904	0.180558	0.999901
RNF219-AS1	71.9787	-0.0816132	0.0609566	1.33888	0.180611	0.999901
SLX4IP	18.5347	-0.0574552	0.042946	1.33785	0.180946	0.999901
IFIT1	128.649	-0.0588766	0.0440224	1.33742	0.181084	0.999901
RNF139	529.058	0.0818798	0.0612872	-1.336	0.181548	0.999901
LOC101929762	1.99963	0.0217906	0.0163177	-1.3354	0.181745	0.999901
COL4A5	64.8587	0.069392	0.0519687	-1.33527	0.181789	0.999901
UTP3	317.629	-0.0892524	0.0668435	1.33525	0.181796	0.999901
NBEAL2	198.012	0.0896951	0.0671757	-1.33523	0.1818	0.999901
KIAA1683	97.2119	0.0793846	0.0594731	-1.3348	0.181943	0.999901
PCDHGA6	88.3842	0.0857146	0.0642318	-1.33446	0.182054	0.999901
RAB2B	295.168	-0.0874644	0.0656122	1.33305	0.182515	0.999901
HAS2	742	0.0752843	0.0564992	-1.33249	0.182701	0.999901
PER3	467.379	0.0893647	0.0671388	-1.33105	0.183174	0.999901
MSL3	273.225	0.0870941	0.0654346	-1.33101	0.183186	0.999901
C19orf80	2.00079	0.0202686	0.015231	-1.33075	0.183272	0.999901
RAB9B	24.6052	-0.0670619	0.0504526	1.32921	0.183779	0.999901
ADPRHL1	23.3882	-0.0596719	0.0449161	1.32852	0.184007	0.999901
SEC23B	387.753	0.0847088	0.0638237	-1.32723	0.184432	0.999901
PCDHA1	1.63245	-0.0209472	0.0157859	1.32696	0.184522	0.999901
TAP2	6.3107	-0.030606	0.0230658	1.3269	0.184541	0.999901
NSF	375.805	0.0873049	0.0658025	-1.32677	0.184584	0.999901
AFAP1-AS1	149.697	0.0855036	0.0644487	-1.32669	0.18461	0.999901
SERPINE1	18972	-0.0849886	0.0640803	1.32628	0.184746	0.999901
BTRC	215.622	0.0892216	0.0672764	-1.32619	0.184775	0.999901
FABP3	42.1784	-0.0742243	0.0559771	1.32598	0.184847	0.999901
DUSP5P1	1.18046	-0.0140991	0.0106331	1.32597	0.18485	0.999901
MAPT	19.0063	0.0507941	0.0383564	-1.32427	0.185414	0.999901
MMGT1	452.965	-0.0869067	0.0656324	1.32414	0.185456	0.999901
FDXACB1	30.0625	0.0732404	0.0553264	-1.32379	0.185573	0.999901
MRPL41	353.862	0.0888978	0.0671638	-1.3236	0.185637	0.999901
ZNF525	53.1623	-0.0636188	0.0480671	1.32354	0.185655	0.999901
MID1IP1-AS1	31.0842	0.0684118	0.0517057	-1.3231	0.185802	0.999901
PROX2	17.4637	-0.0417629	0.0315737	1.32271	0.185931	0.999901
PMEL	10.1346	-0.035199	0.0266131	1.32262	0.185962	0.999901
SLC28A3	2.80482	-0.0246398	0.0186468	1.3214	0.186368	0.999901
CES4A	39.4525	-0.0715477	0.0541778	1.32061	0.186631	0.999901
CCDC157	101.145	0.0861914	0.0652663	-1.32061	0.186632	0.999901
ZNF341-AS1	5.10097	0.0368645	0.0279191	-1.32041	0.186699	0.999901
PROSER2-AS1	2.63534	-0.0252898	0.0191534	1.32038	0.186707	0.999901
MFSD11	683.841	-0.0786784	0.0596341	1.31935	0.187051	0.999901
ASAP1-IT2	4.01387	0.0313874	0.0238032	-1.31862	0.187295	0.999901
BIRC7	0.532313	0.0107962	0.00818755	-1.31861	0.187301	0.999901
C14orf183	0.876398	-0.0154526	0.0117237	1.31806	0.187485	0.999901
ASB14	67.1379	0.0850246	0.0645418	-1.31736	0.187719	0.999901
TMEM232	8.90495	-0.043484	0.0330106	1.31727	0.187748	0.999901
LINC01285	1.37913	0.0166898	0.0126806	-1.31617	0.188118	0.999901
TCEAL6	22.9245	0.0641736	0.0487712	-1.31581	0.188238	0.999901
DDAH2	5.24236	0.0345705	0.0262754	-1.3157	0.188275	0.999901
MAD1L1	265.551	-0.0882834	0.0671545	1.31463	0.188634	0.999901
LINC00629	3.17556	-0.0234543	0.0178592	1.31329	0.189085	0.999901
PLA2G1B	0.513587	0.0107077	0.00815396	-1.31319	0.189117	0.999901
LRRK1	467.146	0.085728	0.0652995	-1.31284	0.189236	0.999901
FAM195A	84.5716	0.0866088	0.0659844	-1.31256	0.18933	0.999901
EPT1	273.582	-0.0875372	0.0666939	1.31252	0.189344	0.999901
SNORD1B	0.511068	0.0106954	0.00814929	-1.31244	0.189372	0.999901
MIR7974	0.508811	0.0106843	0.00814506	-1.31176	0.189602	0.999901
SERPINB3	0.508811	0.0106843	0.00814506	-1.31176	0.189602	0.999901
ABCC6P1	1.6616	-0.0186308	0.014214	1.31073	0.189949	0.999901
MIR6775	0.503774	0.0106592	0.00813551	-1.31021	0.190124	0.999901
DDI2	76.6607	0.0804079	0.0614234	-1.30908	0.190509	0.999901
WNT1	0.498999	0.0106351	0.00812629	-1.30872	0.190628	0.999901
CACNA1C-AS2	17.0745	-0.0500645	0.0382565	1.30865	0.190652	0.999901
PARS2	30.702	-0.0622937	0.0476126	1.30834	0.190757	0.999901
KRT80	4.32108	0.0324726	0.0248218	-1.30823	0.190796	0.999901
GALE	139.949	0.0877595	0.0670939	-1.30801	0.19087	0.999901
TPRG1-AS2	2.24466	0.0181692	0.0138977	-1.30735	0.191095	0.999901
ZNF486	101.618	0.0839846	0.0643058	-1.30602	0.191546	0.999901
HIST1H4C	1.51099	0.0203059	0.0155531	-1.30559	0.191693	0.999901
TMEM241	90.4491	0.082077	0.0628723	-1.30546	0.191738	0.999901
LINC01121	2.95105	0.0237551	0.0182006	-1.30518	0.191831	0.999901
ZMYM1	143.298	0.0877068	0.0672361	-1.30446	0.192077	0.999901
TSPO2	0.485048	0.0105616	0.00809819	-1.30419	0.192168	0.999901
GLIS3-AS1	39.2196	0.0693688	0.0532472	-1.30277	0.192654	0.999901
LOC101929464	0.480273	0.0105358	0.00808832	-1.3026	0.192712	0.999901
IFI27L2	365.547	0.083386	0.0640502	-1.30189	0.192955	0.999901
HS6ST2	0.477755	0.0105221	0.00808306	-1.30175	0.193003	0.999901
NHS-AS1	0.477755	0.0105221	0.00808306	-1.30175	0.193003	0.999901
SNORA15	0.477755	0.0105221	0.00808306	-1.30175	0.193003	0.999901
TP53TG5	9.38565	-0.0434928	0.0334404	1.30061	0.193393	0.999901
RIMS3	6.29359	0.0315062	0.0242349	-1.30003	0.19359	0.999901
SMIM14	526.015	0.0859724	0.0661791	-1.29909	0.193914	0.999901
CABIN1	908.563	0.0741027	0.0570554	-1.29878	0.194018	0.999901
ITPKA	4.36301	0.0290873	0.0223982	-1.29865	0.194065	0.999901
CPLX1	1.74863	-0.017675	0.0136113	1.29855	0.194098	0.999901
ZNF461	70.1757	0.0838853	0.0646953	-1.29662	0.194762	0.999901
FAM49B	183.069	0.0867549	0.0669148	-1.2965	0.194804	0.999901
PIR-FIGF	0.51401	-0.0105216	0.00812081	1.29564	0.1951	0.999901
KCNE2	3.48743	0.0248536	0.0191903	-1.29511	0.195283	0.999901
LOC101927583	11.9479	0.0477349	0.036872	-1.29461	0.195455	0.999901
NRK	3.2511	0.0234669	0.0181318	-1.29424	0.195584	0.999901
CEP152	45.6978	0.0714232	0.0552067	-1.29374	0.195755	0.999901
SRP9	994.442	-0.0774238	0.0599093	1.29235	0.196236	0.999901
QSER1	693.021	0.0725025	0.0561157	-1.29202	0.196351	0.999901
FRMPD3	1.9878	0.0202677	0.0156879	-1.29193	0.196382	0.999901
SUCLG2-AS1	21.6169	-0.0643625	0.0498208	1.29188	0.196399	0.999901
SPINK4	0.500113	-0.0104534	0.00809482	1.29137	0.196576	0.999901
LAMA1	275.32	-0.0768278	0.0594935	1.29136	0.196577	0.999901
ANO4	0.499814	-0.0104517	0.00809419	1.29126	0.196614	0.999901
STAM-AS1	0.499814	-0.0104517	0.00809419	1.29126	0.196614	0.999901
MINPP1	384.463	-0.0853924	0.0661976	1.28996	0.197064	0.999901
RAB30-AS1	33.6941	-0.070721	0.0548294	1.28984	0.197107	0.999901
BEND6	273.706	-0.0864764	0.0670524	1.28968	0.19716	0.999901
SNRNP27	286.322	-0.0830086	0.0643946	1.28906	0.197377	0.999901
BOLA3-AS1	52.9268	-0.0744689	0.0577804	1.28883	0.197459	0.999901
VWA5B2	1.54285	-0.0196057	0.0152134	1.28871	0.197498	0.999901
PAX6	14.0066	0.0534273	0.0414591	-1.28868	0.197511	0.999901
SNORD113-1	0.490428	-0.0104035	0.00807579	1.28824	0.197664	0.999901
TRIM46	96.6403	0.0620955	0.0482034	-1.2882	0.197678	0.999901
ULBP2	30.5794	0.0673944	0.0523498	-1.28739	0.19796	0.999901
LINC00526	23.0703	-0.0564813	0.0439037	1.28648	0.198274	0.999901
SPATA33	42.3276	0.0719691	0.0559531	-1.28624	0.198359	0.999901
UBE2B	647.056	-0.0732887	0.0569822	1.28617	0.198384	0.999901
NAP1L4	991.252	0.0693784	0.0539525	-1.28592	0.198473	0.999901
CCNB1	59.722	0.0620873	0.0483025	-1.28538	0.198658	0.999901
SPRYD7	127.459	-0.0863359	0.0672225	1.28433	0.199027	0.999901
NCOR2	2579.14	0.0845819	0.0658697	-1.28408	0.199114	0.999901
GPRASP1	96.1665	0.0806137	0.0628	-1.28366	0.199262	0.999901
LINC00482	0.476531	-0.0103297	0.00804747	1.2836	0.199283	0.999901
HAVCR2	6.62114	-0.0257769	0.0200855	1.28336	0.199366	0.999901
IL32	10.0719	-0.0401885	0.0313249	1.28296	0.199507	0.999901
MIR4263	1.1923	-0.0172809	0.0134706	1.28286	0.199541	0.999901
POLB	103.766	-0.0825484	0.0643536	1.28273	0.199586	0.999901
ZNF696	113.339	0.0860925	0.0671234	-1.2826	0.199632	0.999901
GCNT7	4.22352	0.0311493	0.0242864	-1.28258	0.199638	0.999901
LOC100499489	67.9066	0.0828072	0.0645633	-1.28257	0.199642	0.999901
HAS3	199.494	-0.0859848	0.0670413	1.28256	0.199645	0.999901
CDK5R1	31.6445	-0.0601609	0.0469135	1.28238	0.19971	0.999901
UQCRBP1	33.5428	0.0661145	0.0516071	-1.28111	0.200154	0.999901
MIR106B	0.467144	-0.0102777	0.00802744	1.28032	0.200434	0.999901
ZDHHC12	97.8038	0.0823481	0.0643277	-1.28013	0.200498	0.999901
LOC100287072	2.22503	-0.0186877	0.0146085	1.27924	0.200813	0.999901
ZNF460	44.2408	0.0725405	0.0567139	-1.27906	0.200876	0.999901
ANKRA2	211.369	0.0858694	0.0671407	-1.27895	0.200915	0.999901
TDRD9	34.5185	0.0672053	0.0525524	-1.27882	0.200959	0.999901
MED21	257.205	-0.0848462	0.0663632	1.27851	0.201069	0.999901
ANKRD31	4.16773	0.0267264	0.0209258	-1.2772	0.201533	0.999901
LOC403312	2.65193	-0.0166615	0.0130544	1.27631	0.201845	0.999901
DCAF5	751.212	0.0708553	0.055531	-1.27596	0.20197	0.999901
SNAPC4	248.968	0.0847952	0.0664801	-1.2755	0.202133	0.999901
CCDC43	206.653	-0.0856046	0.067186	1.27414	0.202612	0.999901
ZBTB33	285.442	-0.0856202	0.067271	1.27277	0.203101	0.999901
LOC102467080	3.36642	-0.0275858	0.0216924	1.27168	0.203486	0.999901
LINC00665	48.3954	0.0720194	0.0566547	-1.2712	0.203658	0.999901
PPM1E	5.703	-0.0350968	0.0276224	1.27059	0.203874	0.999901
PDXDC1	1425.95	-0.0787225	0.0619917	1.26989	0.204125	0.999901
SAR1B	583.004	-0.0828525	0.0652586	1.2696	0.204226	0.999901
NFKBIZ	1077.69	0.0853337	0.0672616	-1.26868	0.204554	0.999901
CDKL4	1.50573	0.0197634	0.015579	-1.26859	0.204586	0.999901
KIF25	1.28256	0.015398	0.0121379	-1.26859	0.204586	0.999901
C14orf166	731.54	-0.0752224	0.0593218	1.26804	0.204784	0.999901
OXLD1	72.7474	-0.0803846	0.0633999	1.2679	0.204835	0.999901
GNL2	503.633	0.076193	0.0601167	-1.26742	0.205005	0.999901
SRBD1	178.023	-0.0841586	0.0664131	1.2672	0.205084	0.999901
SSBP3-AS1	13.3783	0.0451551	0.0356451	-1.26679	0.205229	0.999901
CDH24	85.4927	-0.0828604	0.0654675	1.26567	0.205631	0.999901
ATP2B1	2355.63	-0.0827897	0.0654281	1.26535	0.205745	0.999901
CACNG8	5.10419	-0.0201795	0.0159488	1.26527	0.205776	0.999901
DDN	4.36796	0.0235384	0.0186059	-1.2651	0.205835	0.999901
LINC00630	28.6808	0.0620004	0.0490093	-1.26507	0.205844	0.999901
ERVMER34-1	1.03677	-0.0126964	0.0100368	1.26499	0.205875	0.999901
IER2	3620.82	-0.0843764	0.0667133	1.26476	0.205957	0.999901
KCNK7	3.19132	-0.0244234	0.0193249	1.26383	0.206292	0.999901
IGSF10	114.777	0.0768803	0.0608812	-1.26279	0.206664	0.999901
POM121L1P	1.88548	0.0205281	0.0162602	-1.26247	0.206779	0.999901
C16orf74	2.70146	0.0257329	0.0203845	-1.26237	0.206814	0.999901
RDH16	2.41315	-0.021637	0.0171455	1.26196	0.206963	0.999901
MORF4L2-AS1	27.0375	-0.0654667	0.0518816	1.26185	0.207004	0.999901
PQLC2	205.166	0.0844559	0.0669973	-1.26059	0.207458	0.999901
TMEM56-RWDD3	3.17959	0.0264516	0.020993	-1.26002	0.207661	0.999901
LOC101929586	6.94081	0.0381179	0.030264	-1.25951	0.207845	0.999901
C14orf169	105.623	-0.0832161	0.0660806	1.25931	0.207918	0.999901
ZSWIM1	90.7729	0.0840382	0.0667825	-1.25839	0.208252	0.999901
LHFPL1	1.7388	0.0158601	0.0126154	-1.25721	0.208679	0.999901
LAMTOR5-AS1	2.67964	0.0211289	0.0168153	-1.25653	0.208924	0.999901
ST7	140.98	-0.0845025	0.0672698	1.25617	0.209053	0.999901
ADCY8	11.7434	0.0278966	0.0222119	-1.25593	0.209141	0.999901
SMIM12	241.728	-0.084343	0.0671638	1.25578	0.209196	0.999901
CCDC159	101.731	-0.0811297	0.0646182	1.25552	0.209289	0.999901
XPA	107.443	0.0830353	0.0661423	-1.2554	0.209332	0.999901
TMED11P	3.98491	-0.0252322	0.0200989	1.2554	0.209332	0.999901
SYP	7.27228	0.0388315	0.030949	-1.2547	0.209589	0.999901
COA1	231.88	0.0818377	0.0652558	-1.25411	0.209803	0.999901
EPHA2	1092.76	-0.0827291	0.0659793	1.25387	0.209891	0.999901
COPS7A	918.818	0.0670871	0.053511	-1.25371	0.209948	0.999901
LOC100507053	75.0925	-0.0766732	0.0611821	1.2532	0.210134	0.999901
PLCB2	1.49225	0.0183347	0.0146344	-1.25285	0.21026	0.999901
MIR3176	2.67441	-0.0206075	0.016451	1.25266	0.21033	0.999901
CYP2F1	1.51722	-0.0193632	0.0154706	1.25162	0.21071	0.999901
SEPSECS	113.142	0.0825219	0.0659441	-1.25139	0.210791	0.999901
SMAD6	424.067	-0.0839432	0.0670955	1.2511	0.210898	0.999901
LOC100130093	105.545	-0.0827524	0.0661889	1.25025	0.21121	0.999901
TERC	1.40999	0.0150631	0.0120505	-1.25	0.2113	0.999901
ZNF112	75.0363	0.0799422	0.063981	-1.24947	0.211494	0.999901
CYP26A1	0.995532	-0.0131304	0.0105089	1.24945	0.2115	0.999901
LINC01023	6.4591	-0.0335572	0.026864	1.24915	0.21161	0.999901
RSAD2	6.59292	-0.0237999	0.0190693	1.24808	0.212003	0.999901
C1orf109	149.758	0.0838121	0.0671847	-1.24749	0.212219	0.999901
ZNF385C	9.58148	0.0451766	0.0362165	-1.24741	0.212248	0.999901
WDR92	136.176	-0.0829134	0.0664698	1.24738	0.212257	0.999901
DIO2-AS1	1.78892	0.0129122	0.0103527	-1.24723	0.212313	0.999901
MMP8	3.73231	0.0247758	0.0198653	-1.24719	0.212328	0.999901
CYR61	13566.7	-0.0838326	0.0672393	1.24678	0.212478	0.999901
HEATR1	898.842	-0.0696942	0.0559461	1.24574	0.21286	0.999901
LEAP2	2.49686	-0.0234039	0.0187945	1.24525	0.213038	0.999901
NACAP1	20.3726	-0.0525669	0.0422291	1.2448	0.213204	0.999901
TMCO4	158.423	0.0836589	0.0672302	-1.24436	0.213365	0.999901
POLDIP3	833.467	0.0686898	0.0552334	-1.24363	0.213637	0.999901
AUP1	836.119	0.0669874	0.0538844	-1.24317	0.213806	0.999901
CORO1A	5.98232	-0.0360319	0.0289983	1.24255	0.214032	0.999901
PDZD4	6.09283	-0.0329908	0.0265789	1.24124	0.214517	0.999901
TARSL2	117.355	-0.0829994	0.0669223	1.24024	0.214888	0.999901
SEC14L1	945.948	0.073444	0.0592305	-1.23997	0.214986	0.999901
OCLM	5.29639	-0.0314985	0.0254094	1.23964	0.215109	0.999901
FAM78B	4.74393	0.0314065	0.0253357	-1.23961	0.215119	0.999901
SH3TC1	45.9307	0.0703756	0.0567971	-1.23907	0.215319	0.999901
ZNRD1-AS1	1.33735	-0.0156695	0.0126524	1.23846	0.215545	0.999901
ACTC1	1.39706	0.0146291	0.0118145	-1.23823	0.215629	0.999901
LINC00877	1.91244	0.0185307	0.014967	-1.23811	0.215677	0.999901
SNORD6	3.55242	0.0246798	0.0199433	-1.2375	0.215902	0.999901
MAP1LC3B	1368.02	-0.0646519	0.0522617	1.23708	0.216057	0.999901
CARM1	1117.51	-0.0690883	0.0558513	1.237	0.216085	0.999901
CA3	1.82354	0.0195314	0.015791	-1.23687	0.216135	0.999901
KLHL35	19.3593	0.0574088	0.0464165	-1.23682	0.216154	0.999901
GCKR	10.2498	0.0415052	0.033559	-1.23678	0.216168	0.999901
CLEC2B	60.1996	0.0569338	0.0460355	-1.23674	0.216184	0.999901
HARS2	257.209	-0.0830872	0.067193	1.23655	0.216256	0.999901
DNAJB14	574.771	-0.0763449	0.0617483	1.23639	0.216314	0.999901
DSTN	4332.15	-0.0641207	0.0518632	1.23634	0.216331	0.999901
ZNF649-AS1	10.1823	-0.0424235	0.034314	1.23633	0.216335	0.999901
CYP4F35P	0.989943	-0.00954751	0.0077254	1.23586	0.216511	0.999901
NUFIP1	91.3307	0.0805029	0.065213	-1.23446	0.217032	0.999901
WBP1	49.5016	0.0738585	0.0598741	-1.23356	0.217366	0.999901
MIR6797	1.0326	-0.00950582	0.00770818	1.23321	0.217497	0.999901
AURKC	7.35116	0.0364605	0.0295878	-1.23228	0.217843	0.999901
ONECUT2	1.06359	-0.012733	0.0103337	1.23219	0.217879	0.999901
CDPF1	63.6189	0.0716982	0.0582138	-1.23164	0.218085	0.999901
IDH3A	299.478	-0.0818703	0.0665055	1.23103	0.218312	0.999901
WDR31	44.2618	0.0724517	0.0588871	-1.23035	0.218566	0.999901
SCIMP	10.2025	0.0475629	0.0386622	-1.23022	0.218615	0.999901
PAQR8	128.481	0.0813021	0.0660944	-1.23009	0.218663	0.999901
DTWD2	87.0229	0.0772402	0.0628063	-1.22982	0.218766	0.999901
KHNYN	922.757	0.0760481	0.061876	-1.22904	0.219057	0.999901
LBHD1	41.6689	-0.0697008	0.0567973	1.22718	0.219753	0.999901
MRPL48	103.57	0.081391	0.066324	-1.22717	0.219758	0.999901
LOC728673	19.5807	-0.0420176	0.0342417	1.22709	0.219789	0.999901
CHADL	46.813	-0.0705715	0.0575115	1.22709	0.21979	0.999901
CLLU1	1.36334	-0.0146747	0.0119618	1.22679	0.2199	0.999901
IFT122	378.394	-0.082503	0.0672591	1.22664	0.219956	0.999901
CTRL	18.7818	0.054604	0.0445306	-1.22621	0.220119	0.999901
LOC339059	2.48875	0.0227838	0.0185984	-1.22504	0.220559	0.999901
TPI1	2434.69	0.0765927	0.0626088	-1.22335	0.221196	0.999901
ARHGAP33	132.777	0.0818791	0.0669369	-1.22323	0.221244	0.999901
KHDRBS3	26.6185	-0.0509967	0.0417121	1.22259	0.221486	0.999901
LOC400612	1.22473	0.015273	0.012504	-1.22145	0.221915	0.999901
RET	6.39715	0.0272926	0.0223469	-1.22131	0.221967	0.999901
TRIM26	3.59015	0.0247662	0.0203152	-1.2191	0.222808	0.999901
TNFSF13	17.7823	-0.0554347	0.045484	1.21877	0.22293	0.999901
LINC01515	11.4646	-0.031648	0.0259763	1.21834	0.223093	0.999901
DYNC1LI1	349.419	-0.0788357	0.0647152	1.21819	0.22315	0.999901
TANGO6	130.329	0.0816004	0.066987	-1.21815	0.223166	0.999901
IFT43	156.073	0.0814874	0.066925	-1.21759	0.223379	0.999901
EFCAB10	46.0049	-0.0637021	0.0523265	1.2174	0.223453	0.999901
ZBED3-AS1	1.80368	0.0205062	0.016846	-1.21728	0.223499	0.999901
MIB2	713.02	0.0705706	0.0579757	-1.21725	0.223511	0.999901
RABL2A	121.14	-0.0804774	0.0661598	1.21641	0.223829	0.999901
PPP1R35	135.079	-0.081733	0.0672028	1.21621	0.223903	0.999901
USP24	788.295	0.071092	0.0584623	-1.21603	0.223973	0.999901
NEK7	997.208	0.0717497	0.0590042	-1.21601	0.223981	0.999901
GPR18	0.883519	0.0124025	0.0101997	-1.21596	0.224001	0.999901
GAL3ST1	2.27595	0.0200864	0.0165252	-1.2155	0.224175	0.999901
C8orf37-AS1	1.7329	0.0204784	0.0168538	-1.21506	0.224344	0.999901
ANKRD49	66.9759	-0.0747861	0.0615594	1.21486	0.224419	0.999901
PCDHGC5	79.0446	-0.0687292	0.0565766	1.2148	0.224443	0.999901
INMT	9.96304	-0.0400922	0.0330035	1.21478	0.224449	0.999901
UBIAD1	190.366	-0.0816121	0.0672007	1.21445	0.224575	0.999901
MFSD9	59.909	-0.0743266	0.0612018	1.21445	0.224575	0.999901
LOC101926911	3.265	0.0258251	0.0212673	-1.21431	0.224628	0.999901
LINC00661	0.910302	0.012087	0.0099549	-1.21418	0.224679	0.999901
ZNF250	104.845	-0.0800621	0.065943	1.21411	0.224706	0.999901
DNAAF2	138.638	0.0799328	0.0658388	-1.21407	0.224722	0.999901
SNHG4	16.5165	-0.0482914	0.0397871	1.21375	0.224844	0.999901
ELAC1	58.8067	0.0657301	0.0541555	-1.21373	0.224851	0.999901
C3orf35	5.81155	0.032576	0.0268499	-1.21326	0.225029	0.999901
DPH3	383.733	-0.0787876	0.0649776	1.21253	0.225308	0.999901
TSPYL4	397.166	-0.0797918	0.0658148	1.21237	0.225371	0.999901
CIART	42.5432	-0.0616282	0.0508365	1.21228	0.225404	0.999901
CPB2	0.723595	0.0133047	0.0109792	-1.2118	0.225588	0.999901
FAM229A	24.9771	0.05677	0.0468675	-1.21129	0.225785	0.999901
AMBRA1	318.054	0.0813238	0.0671605	-1.21089	0.225939	0.999901
KCTD18	242.731	0.0801839	0.066226	-1.21076	0.225987	0.999901
HFE	178.999	-0.0809669	0.0669179	1.20994	0.2263	0.999901
VAMP3	1328.24	-0.0658638	0.0544383	1.20988	0.226325	0.999901
EZH1	409.917	-0.0738462	0.0610693	1.20922	0.226579	0.999901
ZNF582	29.564	-0.0626416	0.0518068	1.20914	0.22661	0.999901
SLC24A3	4.10298	0.0190326	0.0157459	-1.20873	0.226765	0.999901
OXNAD1	63.8947	0.0738162	0.0610854	-1.20841	0.22689	0.999901
RPTOR	435.474	0.0780351	0.064591	-1.20814	0.226992	0.999901
NOD1	119.836	0.0756594	0.0626257	-1.20812	0.227001	0.999901
REM2	5.25997	-0.032187	0.0266507	1.20774	0.227149	0.999901
HAGLROS	0.92772	-0.0119718	0.00991388	1.20758	0.227209	0.999901
EPB41L5	99.2696	0.079184	0.0655821	-1.2074	0.227277	0.999901
ZNF510	128.241	-0.0812258	0.0672776	1.20732	0.227308	0.999901
HOTS	10.9751	0.0328563	0.0272226	-1.20695	0.22745	0.999901
DDB2	569.909	-0.0810123	0.0671651	1.20617	0.227753	0.999901
C1orf174	168.683	-0.0810996	0.0672779	1.20544	0.228033	0.999901
DNAJA3	346.591	0.079113	0.0656408	-1.20524	0.22811	0.999901
MEIOB	4.40911	-0.0296159	0.0245748	1.20513	0.228153	0.999901
DNTTIP1	196.981	0.0809481	0.0671723	-1.20508	0.228172	0.999901
SELK	239.463	-0.0810581	0.0672643	1.20507	0.228177	0.999901
MON2	916.792	0.0698893	0.0580068	-1.20485	0.228263	0.999901
KIF18A	20.7229	0.0520369	0.0431921	-1.20478	0.228289	0.999901
NOD2	1.60042	-0.0153797	0.0127712	1.20425	0.228494	0.999901
TCP11L1	258.401	0.0785179	0.0652525	-1.20329	0.228863	0.999901
DKKL1	2.36729	0.0231393	0.0192323	-1.20314	0.22892	0.999901
GIPC3	0.90835	-0.0119154	0.00991448	1.20181	0.229436	0.999901
TMEM178A	15.1888	-0.0457673	0.0380927	1.20147	0.229569	0.999901
LOC101927151	58.9149	0.0730042	0.0607689	-1.20134	0.229619	0.999901
MIR614	2.10941	-0.0216761	0.0180453	1.20121	0.229671	0.999901
ATP7B	63.3678	0.0712025	0.0593117	-1.20048	0.229953	0.999901
ODF3L1	8.04543	0.0336034	0.0279953	-1.20032	0.230014	0.999901
AP1S3	12.3514	0.0451405	0.0376107	-1.2002	0.23006	0.999901
DLX2	28.176	-0.0600301	0.0500299	1.19988	0.230184	0.999901
SCARNA27	0.740699	-0.0131264	0.010944	1.19942	0.230364	0.999901
KRT34	0.888114	0.012616	0.0105187	-1.19938	0.230379	0.999901
WTH3DI	40.2689	0.0659639	0.0550055	-1.19922	0.230441	0.999901
ASIC4	1.24548	0.0147197	0.0122782	-1.19885	0.230586	0.999901
IL17C	0.940534	0.00894526	0.00746327	-1.19857	0.230694	0.999901
MSH6	557.432	0.0767302	0.0640244	-1.19845	0.230741	0.999901
CDHR5	6.7491	0.0327058	0.0272913	-1.19839	0.230764	0.999901
FBF1	131.581	0.080188	0.0669405	-1.1979	0.230956	0.999901
SCN5A	0.736155	-0.0131047	0.0109423	1.19762	0.231064	0.999901
HDAC4	405.387	0.0804837	0.06722	-1.19732	0.231183	0.999901
TCEANC	17.6431	-0.0495315	0.0413845	1.19686	0.231361	0.999901
DLGAP1-AS1	26.5784	-0.0550871	0.0460288	1.1968	0.231386	0.999901
C6orf106	1022.36	-0.0631742	0.0528053	1.19636	0.231556	0.999901
MAP4K1	1.8167	-0.0189562	0.0158497	1.196	0.231698	0.999901
IRX2	119.546	0.0731575	0.0611725	-1.19592	0.231727	0.999901
GLIDR	40.4111	0.0602289	0.0503786	-1.19553	0.231882	0.999901
RNF123	520.055	0.0714959	0.059831	-1.19496	0.232101	0.999901
SNORA31	1.87811	-0.0193304	0.0161793	1.19476	0.232181	0.999901
FAM107A	2.0198	-0.0145461	0.0121791	1.19435	0.232342	0.999901
PKDCC	9.08525	0.0369134	0.0309084	-1.19429	0.232366	0.999901
LOC101928043	1.89396	-0.0192777	0.0161431	1.19417	0.232411	0.999901
LINC01356	1.13857	0.0157518	0.0131912	-1.19411	0.232435	0.999901
ECE2	16.8758	-0.0502774	0.0421109	1.19393	0.232506	0.999901
LOC343052	0.39867	0.00884768	0.00741471	-1.19326	0.232768	0.999901
MIR215	0.39867	0.00884768	0.00741471	-1.19326	0.232768	0.999901
SNORD116-12	0.39867	0.00884768	0.00741471	-1.19326	0.232768	0.999901
SMG5	834.752	-0.0725488	0.0608247	1.19275	0.232966	0.999901
CAPZA2	1180.86	-0.0692001	0.0580197	1.1927	0.232987	0.999901
ELOF1	302.778	-0.0795446	0.0667016	1.19254	0.233048	0.999901
MIR29C	0.838505	-0.00889114	0.00745758	1.19223	0.233172	0.999901
CCP110	273.974	-0.0795624	0.066738	1.19216	0.233198	0.999901
RNF44	336.171	0.0769557	0.0645529	-1.19213	0.233208	0.999901
FGF14-AS2	4.08149	0.0281816	0.023647	-1.19176	0.233354	0.999901
TOB1-AS1	3.73231	0.0254251	0.0213347	-1.19173	0.233367	0.999901
MIR661	1.51403	-0.0157939	0.0132639	1.19075	0.233752	0.999901
C5orf49	2.81854	-0.0207942	0.0174666	1.19051	0.233846	0.999901
EXOC3L1	11.3876	0.0419458	0.0352351	-1.19045	0.233868	0.999901
KCTD4	17.3869	-0.0284188	0.0238735	1.19039	0.233892	0.999901
SHROOM1	193.51	-0.0779945	0.0655463	1.18991	0.23408	0.999901
GPR63	2.34225	-0.0190856	0.0160443	1.18955	0.234222	0.999901
RRN3P3	50.3964	-0.0724579	0.0609579	1.18866	0.234575	0.999901
FBXL18	287.329	-0.0784085	0.0659761	1.18844	0.23466	0.999901
CA5B	168.312	-0.0790485	0.0665213	1.18832	0.234708	0.999901
RALGAPA1	11.6709	-0.0417708	0.0351668	1.18779	0.234916	0.999901
FGR	1.87256	-0.0184388	0.0155257	1.18763	0.234977	0.999901
MIR186	13.1191	-0.0472508	0.0397877	1.18757	0.235002	0.999901
ZNF730	5.91662	0.0312255	0.0262997	-1.18729	0.235113	0.999901
MIR6895	0.87807	0.0124905	0.010523	-1.18697	0.235238	0.999901
FANCB	7.77013	0.0382743	0.0322556	-1.18659	0.235388	0.999901
ATOH8	97.9354	-0.0640897	0.0540237	1.18633	0.235494	0.999901
LOC100128770	12.5321	0.0272835	0.0230071	-1.18587	0.235673	0.999901
MICU3	113.985	-0.0792128	0.0668125	1.1856	0.235781	0.999901
UCHL5	271.26	-0.0791763	0.0668165	1.18498	0.236025	0.999901
EED	144.494	0.0797198	0.0672791	-1.18491	0.236052	0.999901
LOC101930010	1.545	-0.0167437	0.0141473	1.18353	0.236601	0.999901
PRRT4	0.377426	0.00869744	0.00735157	-1.18307	0.236781	0.999901
RBP5	44.5324	0.0642008	0.054315	-1.18201	0.237202	0.999901
CROCCP2	152.701	-0.079227	0.0670586	1.18146	0.23742	0.999901
OGFOD2	134.806	-0.0748126	0.0633382	1.18116	0.237539	0.999901
CACNA1B	0.37265	0.00866373	0.00733734	-1.18077	0.237693	0.999901
CSE1L-AS1	0.37265	0.00866373	0.00733734	-1.18077	0.237693	0.999901
MIR548AT	0.37265	0.00866373	0.00733734	-1.18077	0.237693	0.999901
MMP12	0.37265	0.00866373	0.00733734	-1.18077	0.237693	0.999901
PARGP1	0.37265	0.00866373	0.00733734	-1.18077	0.237693	0.999901
XXYLT1-AS2	0.37265	0.00866373	0.00733734	-1.18077	0.237693	0.999901
AK6	109.326	-0.0671026	0.0568352	1.18065	0.237741	0.999901
PSMD6-AS2	27.4997	-0.0613976	0.0520136	1.18041	0.237835	0.999901
LEFTY1	1.09407	-0.015549	0.013173	1.18037	0.237854	0.999901
ZNF546	60.7572	0.068912	0.0583851	-1.1803	0.237881	0.999901
CDH1	0.370132	0.00864543	0.00732961	-1.17952	0.238191	0.999901
HSD17B3	0.370132	0.00864543	0.00732961	-1.17952	0.238191	0.999901
SFR1	61.6555	-0.0662432	0.0561756	1.17922	0.238312	0.999901
PLA2G10	1.29422	0.0138756	0.011768	-1.17909	0.238362	0.999901
HP	0.795847	0.0086524	0.00734013	-1.17878	0.238486	0.999901
SPOP	574.735	0.0693094	0.0588081	-1.17857	0.23857	0.999901
PLOD2	3547.05	0.0784494	0.0665801	-1.17827	0.238688	0.999901
TSNARE1	113.487	0.0759037	0.0644463	-1.17778	0.238883	0.999901
SETD9	47.6814	-0.0712319	0.0605127	1.17714	0.23914	0.999901
KIAA1804	1.31267	0.0139102	0.0118186	-1.17698	0.239204	0.999901
KLHDC4	120.619	0.077816	0.0661454	-1.17644	0.239419	0.999901
MAPK1IP1L	937.854	-0.0725799	0.0617036	1.17627	0.239488	0.999901
OXT	0.803513	-0.0119494	0.0101619	1.1759	0.239635	0.999901
TEAD2	442.72	0.0774072	0.0658408	-1.17567	0.239726	0.999901
DNAJC19	91.4733	-0.0773626	0.0658126	1.1755	0.239795	0.999901
PPP1R10	0.935378	0.0119488	0.010174	-1.17445	0.240214	0.999901
HP09053	44.9373	0.0643671	0.0548091	-1.17439	0.240241	0.999901
MPP2	58.0457	-0.0608318	0.0517997	1.17437	0.240249	0.999901
HRASLS5	2.63781	0.019373	0.0164973	-1.17431	0.240271	0.999901
ISG15	134.489	-0.0561851	0.0478616	1.17391	0.240433	0.999901
PPP2R5C	870.382	-0.0626126	0.0533768	1.17303	0.240784	0.999901
LOC389641	12.7318	-0.0400319	0.0341331	1.17282	0.240869	0.999901
LOC100130370	1.18081	0.015418	0.0131492	-1.17255	0.240977	0.999901
MIR6753	1.18081	0.015418	0.0131492	-1.17255	0.240977	0.999901
KCNMB3	25.9969	0.0616419	0.0525747	-1.17246	0.241011	0.999901
DDX54	585.333	-0.066546	0.0567901	1.17179	0.241282	0.999901
MSANTD1	1.29742	-0.0140701	0.0120114	1.1714	0.241438	0.999901
MMP9	3.65717	0.0230642	0.0196906	-1.17133	0.241466	0.999901
AFP	0.38559	-0.00861203	0.00735288	1.17125	0.2415	0.999901
LOC401177	0.38559	-0.00861203	0.00735288	1.17125	0.2415	0.999901
LOC644838	0.38559	-0.00861203	0.00735288	1.17125	0.2415	0.999901
TMEM105	0.38559	-0.00861203	0.00735288	1.17125	0.2415	0.999901
PPM1K	155.864	-0.0772072	0.0659281	1.17108	0.241566	0.999901
TRAF6	192.637	-0.078431	0.0670491	1.16975	0.2421	0.999901
MMP24-AS1	530.621	0.0782007	0.0668595	-1.16963	0.242151	0.999901
MX1	176.04	-0.0442099	0.0378066	1.16937	0.242254	0.999901
IZUMO4	19.0499	0.0464105	0.0396983	-1.16908	0.242372	0.999901
IL22RA1	0.380748	-0.00857736	0.00733823	1.16886	0.24246	0.999901
KCNC1	0.380748	-0.00857736	0.00733823	1.16886	0.24246	0.999901
KCNH4	0.380748	-0.00857736	0.00733823	1.16886	0.24246	0.999901
MIRLET7F1	0.380748	-0.00857736	0.00733823	1.16886	0.24246	0.999901
RNU6-28P	0.380748	-0.00857736	0.00733823	1.16886	0.24246	0.999901
LOC101929705	8.52983	-0.0297687	0.0254725	1.16866	0.24254	0.999901
NOSIP	318.726	0.0759788	0.0650141	-1.16865	0.242544	0.999901
TMC6	1.50485	-0.0129282	0.0110672	1.16816	0.242744	0.999901
C19orf24	259.71	0.0784262	0.0671548	-1.16784	0.24287	0.999901
LOC648987	57.7638	-0.0588982	0.0504505	1.16744	0.243031	0.999901
UBE2E4P	145.965	-0.074334	0.063678	1.16734	0.243072	0.999901
MAP7D3	224.953	-0.0767893	0.0658044	1.16693	0.243238	0.999901
PROB1	20.2655	0.0572575	0.0490712	-1.16682	0.243281	0.999901
SNORD80	20.2457	0.0493494	0.0422964	-1.16675	0.243311	0.999901
TMEM132A	609.002	0.0783697	0.0672103	-1.16604	0.243599	0.999901
RPUSD3	104.056	0.0769518	0.0660173	-1.16563	0.243764	0.999901
HMCN2	1.07916	-0.00848391	0.00728308	1.16488	0.244068	0.999901
FLJ27354	3.90631	0.0258531	0.022194	-1.16487	0.244072	0.999901
PRPF38A	276.011	0.0778068	0.0668535	-1.16384	0.244489	0.999901
SEMA6B	14.9991	0.0344012	0.0295729	-1.16327	0.24472	0.999901
NUP35	71.3667	0.0724785	0.0623162	-1.16308	0.244799	0.999901
LHX4	12.0957	0.0425336	0.0365902	-1.16243	0.245061	0.999901
SH2D6	0.923331	-0.0117676	0.0101301	1.16165	0.245379	0.999901
C20orf144	4.30508	-0.0251861	0.0216827	1.16158	0.245407	0.999901
MTA3	289.975	0.0781156	0.0672629	-1.16135	0.245501	0.999901
RSPRY1	377.849	-0.0737198	0.0634875	1.16117	0.245573	0.999901
AK2	638.872	0.0727118	0.0626706	-1.16022	0.245959	0.999901
DNAJC28	10.2868	0.043558	0.0375566	-1.15979	0.246132	0.999901
AKAP8	377.27	-0.0726573	0.0626535	1.15967	0.246184	0.999901
TMEM262	4.21147	0.0258719	0.0223143	-1.15943	0.246279	0.999901
ABCC10	316.162	0.0731853	0.0631401	-1.15909	0.246418	0.999901
SCN2A	60.8636	-0.068001	0.0586764	1.15892	0.24649	0.999901
C17orf97	22.1131	-0.0535696	0.0462244	1.1589	0.246495	0.999901
C11orf91	2.30276	0.0178502	0.0154092	-1.15842	0.246694	0.999901
GRTP1-AS1	1.23401	-0.0143706	0.012408	1.15818	0.246792	0.999901
DGUOK-AS1	86.919	-0.0708846	0.0612124	1.15801	0.24686	0.999901
BLOC1S4	142.809	-0.0778854	0.067279	1.15765	0.247008	0.999901
MMP1	65.4578	0.0289581	0.0250173	-1.15752	0.247058	0.999901
LOC100507091	0.757399	-0.0126857	0.0109625	1.1572	0.247192	0.999901
FCGR1B	0.357464	-0.008408	0.00726607	1.15716	0.247207	0.999901
ITK	0.357464	-0.008408	0.00726607	1.15716	0.247207	0.999901
ARRDC3-AS1	6.99355	0.0350549	0.0303103	-1.15653	0.247464	0.999901
LYPLAL1	111.698	-0.077411	0.0669404	1.15642	0.247511	0.999901
ADIPOR2	716.588	-0.0700942	0.0606182	1.15632	0.247549	0.999901
SENP5	440.374	-0.0776629	0.0672702	1.15449	0.248298	0.999901
LOC101929231	71.7217	-0.0736173	0.0637674	1.15447	0.248309	0.999901
PFDN2	306.86	0.0775438	0.0671905	-1.15409	0.248464	0.999901
IPO8	672.642	-0.0646898	0.0560554	1.15403	0.248486	0.999901
PLEKHJ1	364.727	-0.076167	0.0660015	1.15402	0.248492	0.999901
ZNF45	162.484	-0.0771477	0.0668762	1.15359	0.248668	0.999901
KANSL1	287.767	-0.0732756	0.063532	1.15337	0.248761	0.999901
TMEM141	191.323	0.0769148	0.0667014	-1.15312	0.248861	0.999901
BCL2L10	2.15884	0.0202607	0.0175706	-1.15311	0.248867	0.999901
TMEM150A	216.574	0.0769751	0.0668615	-1.15126	0.249625	0.999901
MIR3074	17.2861	-0.0335542	0.0291729	1.15019	0.250067	0.999901
CCM2	484.211	-0.0762148	0.0662698	1.15007	0.250115	0.999901
SBNO2	1652.29	0.0666934	0.0580249	-1.14939	0.250394	0.999901
BSN	15.0202	0.0414544	0.0360741	-1.14915	0.250495	0.999901
C2orf81	49.6835	-0.0673594	0.0586466	1.14857	0.250735	0.999901
PCDHB8	15.4256	0.0293729	0.025576	-1.14846	0.25078	0.999901
CACFD1	252.586	0.0769485	0.0670128	-1.14826	0.250859	0.999901
XKRX	0.850025	0.0117035	0.0101944	-1.14803	0.250956	0.999901
DTX4	9.66957	0.0252001	0.0219531	-1.1479	0.251008	0.999901
DHX33	243.027	0.0770946	0.067227	-1.14678	0.251472	0.999901
P2RY2	14.5034	0.0464256	0.0404908	-1.14657	0.251559	0.999901
C7orf31	17.057	0.0425462	0.0371149	-1.14634	0.251656	0.999901
NSMAF	516.479	-0.0769725	0.0671467	1.14633	0.251657	0.999901
LINC00184	0.925783	-0.011607	0.0101281	1.14602	0.251788	0.999901
SACM1L	494.614	0.0748439	0.0653158	-1.14588	0.251846	0.999901
TRABD2A	6.27365	-0.0190542	0.0166391	1.14514	0.252149	0.999901
LMBRD1	655.426	-0.0769938	0.0672372	1.14511	0.252165	0.999901
DTNBP1	125.245	-0.0741238	0.0647462	1.14484	0.252277	0.999901
CYSLTR1	1.67373	-0.0117466	0.0102633	1.14453	0.252405	0.999901
CUTC	91.8681	0.0751893	0.0657008	-1.14442	0.25245	0.999901
ZFP28	99.4495	0.0750212	0.065556	-1.14438	0.252465	0.999901
ZBTB43	217.103	-0.076943	0.0672368	1.14436	0.252475	0.999901
KLF7	801.112	-0.074085	0.0647411	1.14433	0.252487	0.999901
HSD17B1	138.918	0.0763873	0.0667673	-1.14408	0.25259	0.999901
ANKRD34A	37.67	0.0648461	0.0566798	-1.14408	0.252591	0.999901
MIR4492	2.86523	-0.0208324	0.018209	1.14408	0.252592	0.999901
HIGD1B	2.0223	-0.0196424	0.0171713	1.1439	0.252663	0.999901
SNORD76	1.15247	-0.0144322	0.0126196	1.14363	0.252776	0.999901
LOC100507437	26.5417	0.0481507	0.0421147	-1.14332	0.252904	0.999901
C1orf86	582.282	0.0716287	0.0626604	-1.14313	0.252987	0.999901
COL5A1	16025	0.0733679	0.0641971	-1.14285	0.253099	0.999901
C20orf196	11.0142	-0.0425294	0.037232	1.14228	0.253337	0.999901
DYNLL1	1376.21	-0.0670951	0.0587577	1.14189	0.253498	0.999901
ASNSD1	525.96	-0.0692397	0.0606612	1.14142	0.253696	0.999901
TRIM61	15.4627	0.0486222	0.0425984	-1.14141	0.253699	0.999901
TMEM242	190.239	-0.0766425	0.0671506	1.14135	0.253724	0.999901
TMEM246-AS1	5.90837	-0.0292596	0.025648	1.14081	0.253947	0.999901
SYCP3	37.227	0.0613951	0.053822	-1.14071	0.253992	0.999901
LINC00652	0.805198	0.0111487	0.00977798	-1.14019	0.254209	0.999901
PCAT6	38.6233	-0.0551548	0.0483795	1.14004	0.254268	0.999901
NETO1	0.733702	-0.00812985	0.00713336	1.13969	0.254414	0.999901
KLRD1	3.29087	0.0176818	0.0155253	-1.1389	0.254744	0.999901
NUP210	2.07057	0.0157807	0.0138578	-1.13876	0.254804	0.999901
PI4K2A	773.716	-0.0714843	0.0628006	1.13827	0.255006	0.999901
DPY19L2	20.7809	0.0419218	0.0368373	-1.13803	0.25511	0.999901
ATP6V0A2	250.762	-0.0762161	0.0669778	1.13793	0.255149	0.999901
TMEM89	0.880942	-0.0115339	0.0101402	1.13744	0.255352	0.999901
TMEM92-AS1	2.52393	-0.0201207	0.0176898	1.13742	0.255364	0.999901
FAM127C	346.808	-0.0719306	0.0632992	1.13636	0.255806	0.999901
MANBAL	392.583	-0.0697824	0.0614138	1.13627	0.255845	0.999901
MMP25-AS1	42.2976	0.0562584	0.0495437	-1.13553	0.256153	0.999901
HOXB5	26.1138	-0.0472885	0.0416664	1.13493	0.256404	0.999901
EPS8	1678.77	-0.06969	0.0614054	1.13492	0.256411	0.999901
LOC645513	96.8492	0.0738185	0.065052	-1.13476	0.256475	0.999901
MIR4515	1.52724	0.0157666	0.0139012	-1.13419	0.256714	0.999901
RTEL1	16.0775	0.0462074	0.0407424	-1.13414	0.256737	0.999901
CDKN2B-AS1	64.5033	-0.0522776	0.046095	1.13413	0.256741	0.999901
LINC00116	98.9827	0.0718198	0.0633709	-1.13333	0.257077	0.999901
AGO4	344.518	-0.076152	0.0671944	1.13331	0.257084	0.999901
HTATSF1	512.014	-0.0743303	0.0656065	1.13297	0.257226	0.999901
MINK1	1105.1	0.0652018	0.0575753	-1.13246	0.25744	0.999901
C10orf12	56.9527	0.07074	0.0624716	-1.13235	0.257485	0.999901
LOC220729	85.0632	-0.0739595	0.0653289	1.13211	0.257588	0.999901
MIR4512	0.862501	-0.0114775	0.0101429	1.13158	0.257811	0.999901
ABHD15	199.817	-0.0755472	0.0667921	1.13108	0.258021	0.999901
GPT	29.8881	-0.0542791	0.0480061	1.13067	0.258194	0.999901
EIF4E	183.219	-0.0758645	0.0671231	1.13023	0.25838	0.999901
CTC-436P18.1	57.682	0.0677386	0.0599514	-1.12989	0.258522	0.999901
SLFN13	11.097	-0.0318979	0.0282567	1.12886	0.258956	0.999901
SMIM1	15.2451	0.0430048	0.0381088	-1.12847	0.259121	0.999901
LSM11	88.1321	0.0730625	0.0647447	-1.12847	0.259121	0.999901
MIR4467	2.34298	0.0209967	0.0186069	-1.12844	0.259136	0.999901
RPUSD2	55.363	0.0628824	0.0557718	-1.12749	0.259534	0.999901
EIF3J	473.512	0.0700023	0.0620938	-1.12736	0.259589	0.999901
TMEM71	3.96681	0.0171815	0.0152446	-1.12706	0.259718	0.999901
FGF11	20.1611	0.0483214	0.0429165	-1.12594	0.26019	0.999901
FLJ31104	1.46172	-0.0162041	0.0143918	1.12592	0.260198	0.999901
R3HCC1	194.148	-0.0746241	0.0662824	1.12585	0.260229	0.999901
HHLA3	49.4082	-0.062724	0.0557151	1.1258	0.260251	0.999901
FANCF	59.0698	0.0668659	0.0594001	-1.12569	0.260298	0.999901
ZNF454	13.3452	0.041872	0.0372023	-1.12552	0.260368	0.999901
ATG101	481.997	0.0718693	0.0638642	-1.12535	0.260442	0.999901
SDK2	0.667764	-0.00792787	0.00704514	1.1253	0.260463	0.999901
FAM186B	10.345	-0.0410404	0.0364845	1.12487	0.260642	0.999901
C10orf32	201.648	-0.0753782	0.0670258	1.12461	0.260752	0.999901
LOC101927211	2.60193	-0.0168368	0.014973	1.12448	0.26081	0.999901
RHOH	2.08758	0.0151093	0.0134372	-1.12444	0.260826	0.999901
KATNAL2	34.7595	0.0566042	0.0503464	-1.1243	0.260888	0.999901
MYNN	255.55	-0.0753846	0.0670609	1.12412	0.260961	0.999901
HIST1H4K	3.20688	0.0250211	0.0222591	-1.12408	0.260978	0.999901
LOC728024	17.4274	-0.0476523	0.0424095	1.12362	0.261173	0.999901
TNKS2-AS1	1.63003	0.013647	0.0121459	-1.12359	0.261189	0.999901
CSPP1	199.138	-0.0746987	0.0664899	1.12346	0.261243	0.999901
ZNF287	92.761	-0.0734635	0.0654367	1.12267	0.261579	0.999901
LOC729603	34.165	0.0515476	0.0459242	-1.12245	0.261672	0.999901
UCP2	6.67	-0.0226957	0.0202225	1.1223	0.261735	0.999901
MDC1	2.22524	0.0181376	0.0161623	-1.12222	0.261769	0.999901
C10orf25	33.6536	0.0597942	0.0532864	-1.12213	0.261807	0.999901
LOC102724919	2.5206	0.0186538	0.0166301	-1.12169	0.261994	0.999901
SH2D5	4.29866	-0.0268866	0.0239747	1.12146	0.262092	0.999901
FOXC2-AS1	54.3859	0.0641613	0.0572538	-1.12065	0.262439	0.999901
NCEH1	166.167	-0.0653747	0.0583722	1.11996	0.262729	0.999901
GPBP1L1	728.041	-0.0627839	0.0560614	1.11991	0.26275	0.999901
ZNF212	135.985	0.0750211	0.066998	-1.11975	0.26282	0.999901
SLC25A12	306.231	-0.0741995	0.0662907	1.1193	0.26301	0.999901
SLC25A35	154.032	0.0744436	0.0665201	-1.11911	0.263091	0.999901
BEND5	29.0572	0.0571101	0.0510402	-1.11892	0.263173	0.999901
DRG1	311.697	-0.0738441	0.0660048	1.11877	0.263238	0.999901
DDX55	174.542	0.0745198	0.0666155	-1.11865	0.263288	0.999901
SIVA1	276.771	0.0710117	0.0635	-1.11829	0.263441	0.999901
UQCR11	627.536	0.0707976	0.0633423	-1.1177	0.263696	0.999901
TSPY26P	20.739	-0.0524725	0.0469648	1.11727	0.263878	0.999901
MAP6D1	19.2395	-0.0446638	0.0399854	1.117	0.263992	0.999901
RPGR	71.1312	0.0719626	0.0644338	-1.11685	0.26406	0.999901
PTDSS2	377.697	-0.070366	0.0630162	1.11663	0.264151	0.999901
RPS15AP10	6.44695	-0.0238087	0.0213224	1.1166	0.264164	0.999901
SRPK3	7.87507	0.0337525	0.030242	-1.11608	0.264389	0.999901
LIPE	22.8315	0.0420365	0.0376649	-1.11607	0.264393	0.999901
MIR6883	2.49314	-0.0201104	0.0180192	1.11606	0.264398	0.999901
SFPQ	2138.48	-0.0491887	0.0440931	1.11557	0.264608	0.999901
SYN1	17.9227	0.0499505	0.0447909	-1.11519	0.264768	0.999901
HOXB7	128.39	-0.0750236	0.0672756	1.11517	0.264778	0.999901
GABRA1	0.777978	0.0077424	0.00694576	-1.11469	0.264982	0.999901
USP54	142.965	0.0714571	0.0641112	-1.11458	0.26503	0.999901
LRRC29	33.5785	0.0618866	0.0555457	-1.11416	0.265212	0.999901
PXT1	0.827507	-0.0113058	0.0101477	1.11413	0.265224	0.999901
HID1	0.658661	0.00773027	0.00693924	-1.11399	0.265282	0.999901
LOC101929577	2.62442	0.0211538	0.0189906	-1.11391	0.265317	0.999901
MORN3	10.5588	0.034435	0.0309268	-1.11344	0.265522	0.999901
LOC100506142	9.89974	-0.0325999	0.0292827	1.11328	0.265586	0.999901
MIR6843	0.653886	0.00771459	0.00693221	-1.11286	0.265768	0.999901
SLC35F4	0.653886	0.00771459	0.00693221	-1.11286	0.265768	0.999901
PDSS1	33.206	-0.0608425	0.0546755	1.11279	0.265798	0.999901
RGS17	48.2499	0.0499441	0.044885	-1.11271	0.265832	0.999901
NBL1	29.6292	-0.0539634	0.0485037	1.11256	0.265897	0.999901
CTRB1	1.54227	-0.0142425	0.0128093	1.11189	0.266186	0.999901
TMCO6	65.482	-0.0698531	0.0628333	1.11172	0.266258	0.999901
LOC100506753	18.6873	0.052747	0.0474515	-1.1116	0.266312	0.999901
SDHD	534.155	-0.070915	0.0638114	1.11132	0.26643	0.999901
PYCR2	387.44	-0.0707715	0.0636864	1.11125	0.266461	0.999901
LINC00908	1.39088	0.0167427	0.0150674	-1.11119	0.266486	0.999901
BCL3	546.173	0.0743226	0.0669069	-1.11084	0.266639	0.999901
CRLF3	151.571	-0.0743525	0.0669524	1.11053	0.266772	0.999901
ZFAND2B	218.979	-0.0738307	0.0664828	1.11052	0.266773	0.999901
BBS2	491.203	-0.0679965	0.0613031	1.10919	0.26735	0.999901
COQ10A	75.1543	-0.0673674	0.0607527	1.10888	0.267482	0.999901
GRPR	2.31143	0.0135256	0.0121997	-1.10869	0.267566	0.999901
MIR4750	0.679942	-0.0076849	0.00693682	1.10784	0.26793	0.999901
PARG	109.674	0.0718771	0.0648823	-1.10781	0.267945	0.999901
LINC00910	32.2526	0.0533886	0.0482016	-1.10761	0.268031	0.999901
TBXA2R	37.2574	-0.047605	0.0430007	1.10707	0.268262	0.999901
KIAA1328	62.0654	-0.0673545	0.0608548	1.10681	0.268377	0.999901
XRCC2	8.96424	0.0349329	0.0315719	-1.10645	0.26853	0.999901
MAGEL2	10.4273	0.0286722	0.0259246	-1.10599	0.268732	0.999901
LRRC58	938.717	-0.0640292	0.0578964	1.10593	0.268758	0.999901
PMCH	10.1028	0.032804	0.0296625	-1.10591	0.268766	0.999901
RASGRP1	6.34051	-0.0260666	0.0235717	1.10584	0.268794	0.999901
LIPA	630.397	-0.0679355	0.0614365	1.10578	0.26882	0.999901
NUP54	342.502	-0.0735185	0.0664867	1.10576	0.268829	0.999901
SYCE2	6.73364	-0.0282332	0.0255339	1.10572	0.26885	0.999901
PAFAH1B2	1001.3	-0.0639008	0.0578125	1.10531	0.269024	0.999901
MIR491	1.52194	0.0150144	0.0135847	-1.10524	0.269055	0.999901
PGGT1B	117.924	-0.0735456	0.0665761	1.10469	0.269296	0.999901
LACTB2	92.6128	-0.0661187	0.0598537	1.10467	0.269301	0.999901
WDR48	428.288	-0.0683048	0.0618341	1.10465	0.269313	0.999901
HSBP1L1	74.5517	0.0541825	0.0490536	-1.10456	0.269352	0.999901
MIR6837	0.77599	-0.00763442	0.00691257	1.10443	0.269409	0.999901
PPCDC	44.8506	0.0576873	0.0522407	-1.10426	0.269481	0.999901
GK5	251.116	0.0742024	0.0672292	-1.10372	0.269713	0.999901
CISD3	510.805	0.0700842	0.0635076	-1.10356	0.269786	0.999901
GLRX3	358.912	0.0701649	0.0635913	-1.10337	0.269865	0.999901
PRDM10	142.4	-0.0728167	0.066002	1.10325	0.269919	0.999901
CRTC2	328.99	0.0686334	0.0622152	-1.10316	0.269957	0.999901
ZNF205	130.711	-0.0741776	0.0672443	1.10311	0.269981	0.999901
CKS1B	59.9722	0.0632783	0.0573902	-1.1026	0.270202	0.999901
EIF2AK2	470.986	-0.0701231	0.0636604	1.10152	0.270671	0.999901
LRRC45	139.429	0.0734233	0.0666688	-1.10131	0.27076	0.999901
NUP37	117.417	-0.0738256	0.0670517	1.10103	0.270886	0.999901
ABHD11	84.0758	-0.068487	0.0622309	1.10053	0.271101	0.999901
FCRLB	9.48423	-0.0382243	0.0347341	1.10048	0.271121	0.999901
LOC441454	7.94747	-0.0356372	0.0323869	1.10036	0.271177	0.999901
NUDT16P1	5.99221	0.02766	0.0251561	-1.09953	0.271536	0.999901
POLK	382.406	-0.0675381	0.0614377	1.09929	0.27164	0.999901
TAB3	286.376	0.073946	0.0672724	-1.0992	0.27168	0.999901
CCDC138	20.5586	-0.0516363	0.0469914	1.09885	0.271835	0.999901
MPV17L2	75.0926	-0.0694447	0.0631989	1.09883	0.271843	0.999901
TSPYL1	1021.72	-0.0703652	0.0640396	1.09878	0.271866	0.999901
RFC4	82.4438	0.0655776	0.0596973	-1.0985	0.271985	0.999901
ZNF282	400.644	0.0719511	0.0655331	-1.09794	0.272233	0.999901
LINC01485	1.69468	0.0167474	0.0152541	-1.0979	0.272249	0.999901
C7orf25	124.99	0.0728476	0.0663796	-1.09744	0.27245	0.999901
GLRA4	1.74293	0.0160687	0.0146438	-1.09731	0.272507	0.999901
STX3	221.027	-0.0719401	0.0655745	1.09707	0.272609	0.999901
MIR4730	1.46829	-0.0153047	0.0139518	1.09697	0.272653	0.999901
CFAP45	5.88467	-0.0268318	0.024463	1.09683	0.272715	0.999901
TMEM120B	256.799	0.073512	0.0670483	-1.09641	0.272902	0.999901
ZNF350	69.9191	-0.0666094	0.060768	1.09613	0.273023	0.999901
LOC102467073	3.53281	-0.0242182	0.0220971	1.09599	0.273084	0.999901
CHTOP	508.026	0.0669701	0.0611443	-1.09528	0.273395	0.999901
PTTG3P	1.04872	0.00945731	0.00863908	-1.09471	0.273643	0.999901
MSANTD3	167.459	0.0736367	0.0672716	-1.09462	0.273684	0.999901
CCDC73	177.071	-0.0734254	0.0670991	1.09428	0.273832	0.999901
ERN2	1.21736	0.0118011	0.0107858	-1.09413	0.273896	0.999901
MIR135A1	0.742321	0.0107404	0.00982107	-1.09361	0.274125	0.999901
SLC8A2	0.671755	0.00745074	0.00681381	-1.09348	0.274184	0.999901
ERO1LB	99.2224	0.071177	0.0651136	-1.09312	0.274341	0.999901
LINC01176	3.5543	0.0238634	0.0218309	-1.0931	0.274349	0.999901
RNF152	19.1646	-0.0353023	0.0322966	1.09307	0.274365	0.999901
TONSL	116.554	-0.0700557	0.0641212	1.09255	0.274591	0.999901
COLCA1	0.66698	0.00743575	0.00680696	-1.09237	0.274668	0.999901
TPD52	0.66698	0.00743575	0.00680696	-1.09237	0.274668	0.999901
LOC100128164	6.14532	0.0234462	0.0214649	-1.09231	0.274698	0.999901
ZBTB20-AS4	1.77704	0.0171435	0.0156953	-1.09227	0.274715	0.999901
ALDH7A1	849.877	-0.0653935	0.0598722	1.09222	0.274737	0.999901
LOC100506100	8.05304	0.0292568	0.0268025	-1.09157	0.275023	0.999901
ZFP41	199.945	0.0720412	0.0660186	-1.09123	0.275174	0.999901
EFNA4	70.826	0.0669861	0.0613873	-1.0912	0.275183	0.999901
RFPL3S	3.22601	0.023601	0.0216374	-1.09075	0.275384	0.999901
C22orf24	2.7367	-0.0209965	0.0192514	1.09065	0.275428	0.999901
PTPRVP	1.54222	-0.014121	0.0129524	1.09022	0.275617	0.999901
LINC00202-1	9.70441	0.0315462	0.0289513	-1.08963	0.275876	0.999901
GATA6-AS1	3.24258	0.016609	0.015243	-1.08961	0.275884	0.999901
SAP130	296.819	-0.0711643	0.065335	1.08922	0.276056	0.999901
LOC728485	1.14334	0.0131131	0.0120438	-1.08878	0.276251	0.999901
B4GALT4	266.332	0.0717767	0.065929	-1.0887	0.276288	0.999901
CDC42BPG	4.1776	0.0252184	0.0231639	-1.08869	0.276289	0.999901
NLE1	119.49	-0.0713024	0.0655058	1.08849	0.276379	0.999901
LOC100129973	4.505	0.0215118	0.0197667	-1.08828	0.27647	0.999901
ZKSCAN3	56.0349	0.0671213	0.061714	-1.08762	0.276763	0.999901
IL18RAP	1.16346	-0.0119305	0.0109709	1.08747	0.27683	0.999901
GRK6	234.818	0.0720597	0.0662938	-1.08698	0.277048	0.999901
RNFT1	131.161	-0.0716327	0.0659029	1.08694	0.277062	0.999901
TAF6	732.955	0.0651664	0.0599724	-1.08661	0.277211	0.999901
HSD17B13	2.95409	0.0179626	0.016534	-1.0864	0.2773	0.999901
FAM98B	355.471	0.0698862	0.0643402	-1.0862	0.277391	0.999901
CDS2	516.897	-0.0688563	0.0633977	1.0861	0.277435	0.999901
SRFBP1	121.87	0.069538	0.0640357	-1.08593	0.277512	0.999901
KIAA1919	64.3205	0.0689919	0.0635335	-1.08591	0.277517	0.999901
THPO	1.2058	0.0118764	0.0109445	-1.08515	0.277857	0.999901
ABCC6	15.1565	-0.036644	0.0337763	1.0849	0.277965	0.999901
C9orf47	3.47537	-0.0180287	0.016623	1.08456	0.278115	0.999901
LOC284454	1105.05	-0.072591	0.0669463	1.08432	0.278224	0.999901
CHEK1	108.315	0.0720428	0.066473	-1.08379	0.278458	0.999901
MERTK	18.9879	-0.0408576	0.0377128	1.08339	0.278636	0.999901
KDM4A	569.615	-0.066354	0.0612497	1.08334	0.278659	0.999901
LOC440600	0.71882	0.0106311	0.00981527	-1.08312	0.278756	0.999901
TRPM8	0.71882	0.0106311	0.00981527	-1.08312	0.278756	0.999901
GLB1L	168.181	-0.0726179	0.0670659	1.08278	0.278904	0.999901
GUSBP9	8.48632	-0.0294593	0.0272259	1.08203	0.279237	0.999901
FAHD2CP	27.5511	0.0565994	0.0523094	-1.08201	0.279247	0.999901
TTBK2	222.054	0.0681307	0.0629736	-1.08189	0.2793	0.999901
PRKAA2	39.5809	0.045764	0.0423176	-1.08144	0.2795	0.999901
POU2F3	0.678286	0.00728773	0.00673914	-1.0814	0.279518	0.999901
FAM71C	0.662922	-0.00732196	0.00677108	1.08136	0.279538	0.999901
SNORD22	1.38921	-0.0166133	0.0153662	1.08116	0.279627	0.999901
FILIP1	9.3041	0.0367659	0.0340211	-1.08068	0.279841	0.999901
DGCR6L	342.327	-0.0716302	0.0662846	1.08065	0.279854	0.999901
ATP6V0A1	519.559	-0.067573	0.062542	1.08044	0.279945	0.999901
RFX3-AS1	11.4827	-0.0432549	0.040035	1.08043	0.279952	0.999901
RNF113A	68.2012	0.0692382	0.0641218	-1.07979	0.280235	0.999901
CDKN3	15.3664	0.0355272	0.0329054	-1.07968	0.280286	0.999901
COX17	95.213	0.0712747	0.0660179	-1.07963	0.280309	0.999901
PPP4R4	3.77947	0.0237526	0.0220022	-1.07956	0.28034	0.999901
CASC10	4.9707	-0.0295266	0.0273617	1.07912	0.280534	0.999901
CAMK2N2	9.20178	-0.0296838	0.0275186	1.07868	0.28073	0.999901
C3orf62	73.2366	0.0666496	0.0617893	-1.07866	0.28074	0.999901
LRRTM4	1.08468	-0.0130121	0.0120637	1.07861	0.28076	0.999901
CD274	23.8315	0.0457042	0.0423826	-1.07837	0.280868	0.999901
LOC100130539	2.68983	0.0191312	0.0177487	-1.07789	0.281082	0.999901
FAM83E	0.735856	-0.0105397	0.00978283	1.07736	0.281318	0.999901
RGS9BP	0.735732	0.0105751	0.00981814	-1.07709	0.281438	0.999901
BBOX1-AS1	2.53744	-0.0189526	0.0175971	1.07703	0.281465	0.999901
LOC100506801	1.08934	-0.0136481	0.0126749	1.07678	0.281578	0.999901
DLEC1	12.5706	0.0425432	0.0395125	-1.0767	0.281613	0.999901
USP50	15.393	-0.0407798	0.0378917	1.07622	0.281829	0.999901
EOMES	0.651629	0.00720503	0.00670085	-1.07524	0.282267	0.999901
CLK2	356.407	0.0679431	0.0631927	-1.07517	0.282297	0.999901
MIR3189	7.22093	0.0228915	0.0212968	-1.07488	0.282428	0.999901
IFT81	215.443	0.0698071	0.0649564	-1.07468	0.28252	0.999901
DLG3-AS1	1.18535	-0.0127746	0.01189	1.0744	0.282645	0.999901
R3HDM4	537.436	0.0679479	0.0632625	-1.07406	0.282794	0.999901
C17orf51	289.087	0.071479	0.0665735	-1.07368	0.282964	0.999901
IMPDH2	1443.29	0.056528	0.0526491	-1.07367	0.282969	0.999901
POLR3D	284.994	0.0694974	0.064733	-1.0736	0.283001	0.999901
FKBP3	493.472	-0.0713942	0.0665027	1.07355	0.283023	0.999901
MEF2A	1208.29	-0.0708048	0.0659864	1.07302	0.283262	0.999901
GGN	57.567	0.0637172	0.0594794	-1.07125	0.284058	0.999901
NKAPL	10.7934	-0.0379032	0.0353919	1.07096	0.284189	0.999901
RBM41	225.605	-0.0719657	0.0672243	1.07053	0.28438	0.999901
ISCA1	263.23	-0.0712519	0.0665649	1.07041	0.284434	0.999901
LOC101927746	1.61821	0.0174346	0.016293	-1.07006	0.284591	0.999901
APOBEC2	1.37006	-0.0157064	0.0146796	1.06995	0.284643	0.999901
DRD4	7.14761	-0.0335214	0.0313307	1.06992	0.284654	0.999901
FSCN3	1.09411	-0.0135541	0.012672	1.06962	0.284792	0.999901
LOC100190986	23.3448	-0.0458655	0.0428817	1.06958	0.284807	0.999901
VAC14-AS1	40.7562	-0.060399	0.0564792	1.0694	0.284888	0.999901
LOC101929516	448.038	-0.0718602	0.0672027	1.06931	0.284932	0.999901
CFAP57	3.30432	0.0186201	0.0174171	-1.06907	0.285036	0.999901
AKAP1	270.257	-0.071495	0.0668884	1.06887	0.285128	0.999901
TMEM253	6.39894	0.0264214	0.0247316	-1.06833	0.285374	0.999901
LENG1	72.5754	-0.0677183	0.0634195	1.06778	0.285618	0.999901
DNAH3	2.20796	0.0159716	0.0149581	-1.06775	0.285631	0.999901
SP140	1.57597	-0.0138925	0.013012	1.06767	0.285669	0.999901
PGAM1P5	1.81961	-0.0162891	0.0152576	1.06761	0.285697	0.999901
FAM133CP	13.9931	0.0394845	0.0369869	-1.06753	0.285734	0.999901
NPTX2	180.728	-0.0704839	0.0660566	1.06702	0.285961	0.999901
TSNAXIP1	30.1838	0.0503015	0.0471489	-1.06687	0.286033	0.999901
TUBGCP6	725.017	0.0610683	0.0572486	-1.06672	0.286098	0.999901
FOXD4L6	0.780478	0.0101886	0.0095517	-1.06668	0.286116	0.999901
FH	416.38	0.0682446	0.064006	-1.06622	0.286323	0.999901
ROCK1P1	30.2398	-0.0486079	0.0455944	1.06609	0.286381	0.999901
TCTA	351.954	-0.0701211	0.0657839	1.06593	0.286455	0.999901
TMOD1	121.021	0.070351	0.0660239	-1.06554	0.286632	0.999901
SSSCA1-AS1	6.10668	-0.0309151	0.0290187	1.06535	0.286718	0.999901
ZNF74	111.601	0.0672909	0.0631686	-1.06526	0.286759	0.999901
PLA2G4B	3.52147	0.0222659	0.0209024	-1.06523	0.286771	0.999901
STK11IP	192.856	-0.0716373	0.0672684	1.06495	0.2869	0.999901
ZNF541	0.827209	-0.0103515	0.00972153	1.06481	0.286964	0.999901
KCNIP2-AS1	3.43184	0.0229112	0.0215225	-1.06453	0.28709	0.999901
PLOD1	3417.51	0.0715113	0.0671948	-1.06424	0.287221	0.999901
ACSBG2	1.45832	0.0106396	0.00999756	-1.06422	0.287229	0.999901
MAPK8IP3	940.243	0.0624227	0.0587134	-1.06318	0.287702	0.999901
NAALADL1	72.1956	0.0683294	0.064278	-1.06303	0.287769	0.999901
MRRF	179.264	0.0710667	0.0668556	-1.06299	0.287787	0.999901
SH3PXD2A-AS1	1.5827	-0.0127329	0.0119911	1.06186	0.288299	0.999901
CETN3	112.279	-0.069508	0.0655066	1.06108	0.288652	0.999901
BCO2	10.2299	0.0395612	0.0372941	-1.06079	0.288785	0.999901
SPIN2A	1.45174	-0.0144781	0.0136514	1.06056	0.288891	0.999901
TBL3	316.084	0.0683179	0.0644631	-1.0598	0.289237	0.999901
KLHL17	195.713	0.0696617	0.0657324	-1.05978	0.289246	0.999901
C14orf105	0.759737	-0.0100851	0.00951636	1.05977	0.289251	0.999901
NFU1	205.851	-0.0712962	0.067278	1.05973	0.289269	0.999901
HIATL1	722.837	-0.0576055	0.0543633	1.05964	0.289309	0.999901
TMEM200B	228.39	0.0659151	0.062208	-1.05959	0.28933	0.999901
ITGA9-AS1	16.8713	-0.0436738	0.0412191	1.05955	0.289348	0.999901
RCHY1	145.743	-0.0663937	0.062665	1.0595	0.289371	0.999901
LOC101928386	1.96199	-0.0186069	0.0175662	1.05924	0.28949	0.999901
SNAI3-AS1	35.8151	-0.0575243	0.0543136	1.05911	0.289548	0.999901
HDAC10	288.668	0.0699971	0.066107	-1.05885	0.28967	0.999901
SPATA7	81.7597	0.0684416	0.0646474	-1.05869	0.289741	0.999901
CSRP3	0.801736	0.0103981	0.00982279	-1.05857	0.289794	0.999901
LINC00987	67.3199	-0.0661598	0.0625499	1.05771	0.290187	0.999901
PLEKHF2	115.542	-0.0708624	0.0669976	1.05769	0.290199	0.999901
ZNF660	18.8785	-0.0399868	0.0378173	1.05737	0.290343	0.999901
MCTP1	16.9969	0.0352187	0.0333181	-1.05704	0.290492	0.999901
PHLPP1	93.2924	0.0662189	0.0626488	-1.05699	0.290518	0.999901
LINC00619	3.15575	0.0160427	0.0151827	-1.05664	0.290675	0.999901
CPQ	1108.98	-0.0602522	0.0570394	1.05633	0.290819	0.999901
ZNF599	42.9241	0.0635268	0.0601541	-1.05607	0.290937	0.999901
STX16-NPEPL1	2.16851	-0.0176137	0.0166842	1.05571	0.291101	0.999901
SCAI	252.001	0.0702676	0.0665826	-1.05535	0.291267	0.999901
HES1	582.975	-0.0547109	0.0518642	1.05489	0.291477	0.999901
SUPV3L1	168.437	-0.0706696	0.0669968	1.05482	0.291507	0.999901
NAGS	13.9405	0.0440814	0.0417927	-1.05476	0.291534	0.999901
ZNF703	407.787	0.068458	0.0649159	-1.05456	0.291625	0.999901
ZSWIM8	1617.53	0.0601361	0.0570356	-1.05436	0.291718	0.999901
ASH1L	1345.21	0.058923	0.0559546	-1.05305	0.292319	0.999901
MFSD10	890.38	0.0606117	0.0575631	-1.05296	0.292359	0.999901
KIFC3	330.626	0.0706873	0.0671443	-1.05277	0.292448	0.999901
DET1	72.037	-0.0692038	0.0657388	1.05271	0.292475	0.999901
C1orf50	70.5577	0.0679319	0.0645493	-1.0524	0.292615	0.999901
PDIK1L	71.4941	0.063215	0.0600697	-1.05236	0.292634	0.999901
C1QTNF1-AS1	0.539607	0.00689519	0.00655472	-1.05194	0.292826	0.999901
ADORA2A	2.63741	-0.0196529	0.0186859	1.05175	0.292915	0.999901
CCDC114	7.33973	0.0297515	0.0282944	-1.0515	0.293029	0.999901
EIF2D	470.246	-0.0609879	0.0580031	1.05146	0.293048	0.999901
FXN	90.8787	-0.068566	0.065234	1.05108	0.293223	0.999901
EME1	92.7322	-0.0700881	0.0666914	1.05093	0.29329	0.999901
UFSP1	9.31331	-0.0340579	0.0324095	1.05086	0.293321	0.999901
CDSN	2.75248	-0.0132658	0.0126237	1.05086	0.293322	0.999901
CLPP	330.685	0.067768	0.0644985	-1.05069	0.293401	0.999901
XAF1	187.038	-0.0672719	0.064033	1.05058	0.293451	0.999901
PDE8B	8.23885	0.0316404	0.0301229	-1.05038	0.293545	0.999901
KRTAP16-1	0.559357	0.00687072	0.00654374	-1.04997	0.293733	0.999901
LOC101928943	0.780491	0.0103083	0.00982209	-1.0495	0.293949	0.999901
MIR1304	2.85522	-0.0221884	0.0211457	1.04931	0.294034	0.999901
TCEAL8	648.323	-0.063407	0.0604515	1.04889	0.294228	0.999901
DYNLRB2	2.63045	-0.019859	0.0189377	1.04865	0.294339	0.999901
FBXO2	24.5166	0.0463171	0.0441694	-1.04862	0.294351	0.999901
HARBI1	25.7353	-0.0517565	0.0493925	1.04786	0.294703	0.999901
ZMAT5	128.33	0.068664	0.065556	-1.04741	0.294911	0.999901
KCNQ1OT1	359.405	0.0695683	0.0664274	-1.04728	0.294969	0.999901
CLUL1	8.65226	0.0308776	0.0294866	-1.04718	0.295019	0.999901
EPHA5-AS1	6.15171	-0.0256851	0.0245294	1.04712	0.295045	0.999901
TOP1P2	1.32321	-0.0148678	0.0141995	1.04707	0.295069	0.999901
ARL1	1022.13	-0.0633706	0.060527	1.04698	0.295108	0.999901
FANCE	58.9131	0.0638159	0.0609627	-1.0468	0.295191	0.999901
TIGD3	1.64713	-0.0122252	0.0116792	1.04674	0.295218	0.999901
CNOT10	176.832	0.0704002	0.0672645	-1.04662	0.295276	0.999901
DNAH2	2.59871	0.0201069	0.0192118	-1.04659	0.295289	0.999901
RHOB	1851.47	-0.0699462	0.0668424	1.04643	0.295361	0.999901
ZNF345	37.9922	-0.0580523	0.0554828	1.04631	0.295418	0.999901
ECI1	205.932	0.0700713	0.0669839	-1.04609	0.295519	0.999901
ZNF468	107.475	-0.0696968	0.0666462	1.04577	0.295666	0.999901
E2F6	145.333	-0.0702512	0.0671805	1.04571	0.295696	0.999901
PCDHGA8	23.4026	0.0434545	0.0415551	-1.04571	0.295696	0.999901
THAP4	335.701	0.0687047	0.0657106	-1.04556	0.295762	0.999901
UBR5	1816.89	-0.0560941	0.0536604	1.04535	0.295859	0.999901
ZCCHC18	17.2371	-0.0428603	0.0410129	1.04505	0.296002	0.999901
SLC25A19	35.7896	0.0592052	0.0566686	-1.04476	0.296133	0.999901
ETFA	538.459	-0.0662697	0.0634417	1.04458	0.296219	0.999901
TEKT5	0.702351	0.00995135	0.00952795	-1.04444	0.296283	0.999901
SMEK1	688.695	-0.0596394	0.0571118	1.04426	0.296367	0.999901
ATP13A4	1.17009	0.0109315	0.0104701	-1.04407	0.296455	0.999901
FSCN2	18.6147	0.0368086	0.0352735	-1.04352	0.296707	0.999901
RAD9A	197.325	-0.0696997	0.0668096	1.04326	0.296828	0.999901
SLC35C1	348.515	0.0666714	0.0639073	-1.04325	0.296832	0.999901
MIR4449	0.56777	-0.0068113	0.00653258	1.04267	0.297103	0.999901
DGAT2L6	0.542136	-0.00680803	0.00653198	1.04226	0.297291	0.999901
MIR4632	0.542136	-0.00680803	0.00653198	1.04226	0.297291	0.999901
PDE7A	153.149	0.0692035	0.0664186	-1.04193	0.297445	0.999901
PCBD2	72.5171	-0.0666565	0.0639786	1.04186	0.297478	0.999901
CIRBP	2649.51	0.0591193	0.0567532	-1.04169	0.297555	0.999901
VMA21	340.326	-0.0685738	0.0659069	1.04047	0.298124	0.999901
KCNMA1-AS1	1.42396	0.0146223	0.014057	-1.04021	0.298241	0.999901
LOC101060091	7.03513	-0.0232015	0.0223159	1.03968	0.298487	0.999901
PPID	260.193	0.06946	0.066829	-1.03937	0.298633	0.999901
CAPN14	1.50539	-0.0127595	0.0122778	1.03923	0.298695	0.999901
SRSF10	141.304	-0.0675658	0.0650221	1.03912	0.298749	0.999901
RHBDF2	142.101	-0.0685876	0.0660057	1.03912	0.298751	0.999901
TSHR	3.88612	-0.0196468	0.0189073	1.03911	0.298752	0.999901
GAREM	200.05	0.0603761	0.0581066	-1.03906	0.298778	0.999901
RBM18	306.742	-0.0693903	0.0667965	1.03883	0.298883	0.999901
LOC100507424	27.2016	0.0450485	0.0433716	-1.03866	0.298961	0.999901
SHQ1	173.064	-0.0698401	0.0672405	1.03866	0.298962	0.999901
GPR173	93.3472	-0.0643844	0.0620121	1.03825	0.299151	0.999901
AP1B1	631.962	0.0650413	0.0626544	-1.0381	0.299225	0.999901
HIST1H2BG	0.553242	-0.00675218	0.00650441	1.03809	0.299226	0.999901
NSD1	1029.64	0.0671289	0.0646797	-1.03787	0.299333	0.999901
TSTD3	44.1545	0.0609627	0.0587462	-1.03773	0.299396	0.999901
TWIST2	49.0991	0.0554401	0.0534352	-1.03752	0.299493	0.999901
ARRDC1	142.182	0.0689062	0.0664223	-1.03739	0.299552	0.999901
IGSF6	5.9166	0.0229857	0.0221599	-1.03726	0.299613	0.999901
LINC00337	0.749696	0.0101745	0.00981874	-1.03623	0.300096	0.999901
TRADD	209.528	-0.0696234	0.0671982	1.03609	0.30016	0.999901
NAA15	404.098	-0.0663938	0.0640962	1.03585	0.300274	0.999901
AMZ1	5.81344	0.0279182	0.0269567	-1.03567	0.300357	0.999901
MIR3132	0.70773	-0.00983538	0.00949728	1.0356	0.300389	0.999901
GRIK5	2.20286	0.0182026	0.0175922	-1.0347	0.30081	0.999901
PON2	500.229	0.068703	0.0664046	-1.03461	0.300851	0.999901
ST3GAL4-AS1	14.5764	0.0411907	0.0398234	-1.03433	0.30098	0.999901
NAF1	128.142	0.0695749	0.0672793	-1.03412	0.30108	0.999901
ABLIM1	68.9907	0.0532708	0.0515254	-1.03388	0.301194	0.999901
KCNIP2	11.6198	0.0355035	0.0343454	-1.03372	0.301268	0.999901
C19orf26	152.774	-0.0691281	0.0669012	1.03329	0.30147	0.999901
TPGS1	239.016	-0.0690053	0.0667879	1.0332	0.30151	0.999901
FRAS1	7.04104	0.0150571	0.0145754	-1.03305	0.301582	0.999901
C8G	4.12237	0.0190769	0.0184709	-1.03281	0.301694	0.999901
LOC101928103	8.69216	0.0296415	0.0287092	-1.03247	0.30185	0.999901
FBXO27	56.0995	0.0528928	0.0512404	-1.03225	0.301956	0.999901
SAFB2	670.026	0.0648113	0.0627901	-1.03219	0.301983	0.999901
AP5S1	145.463	-0.0694388	0.0672766	1.03214	0.302007	0.999901
ZNF404	89.716	0.0662567	0.0642016	-1.03201	0.302067	0.999901
C10orf35	1.68523	0.0149956	0.0145341	-1.03175	0.302188	0.999901
KIAA1429	663.625	-0.0614461	0.0595581	1.0317	0.302212	0.999901
ZNF783	222.729	0.0693735	0.0672745	-1.0312	0.302447	0.999901
TIMM50	374.132	-0.064117	0.0622393	1.03017	0.302931	0.999901
LOC285768	1.15773	-0.0123158	0.0119597	1.02977	0.303116	0.999901
LOC101926889	0.759015	0.0101128	0.00982129	-1.02969	0.303158	0.999901
MYCBP2-AS1	101.901	0.0672892	0.0653518	-1.02964	0.303177	0.999901
LAMP5-AS1	1.47247	0.0130346	0.0126602	-1.02958	0.303209	0.999901
LINC00282	0.694132	-0.00976962	0.0094898	1.02949	0.303251	0.999901
MIR1204	1.7893	0.0149878	0.0145639	-1.0291	0.303432	0.999901
IL20RB	3.55207	0.0220566	0.0214372	-1.02889	0.30353	0.999901
AEBP2	419.251	-0.0681265	0.066223	1.02874	0.3036	0.999901
PGAM4	54.0276	0.0586983	0.0570765	-1.02841	0.303755	0.999901
DNAL4	165.804	0.0672476	0.0653964	-1.02831	0.303805	0.999901
OTUD7A	5.3643	0.0292731	0.0284699	-1.02821	0.30385	0.999901
C7orf49	294.429	-0.0653609	0.0635724	1.02813	0.303887	0.999901
GGT7	540.999	0.0635219	0.0617961	-1.02793	0.303985	0.999901
KCNH3	1.716	0.0151023	0.0146932	-1.02784	0.304024	0.999901
COX5B	541.58	0.0684934	0.066662	-1.02747	0.304198	0.999901
ZNF582-AS1	28.1282	-0.051577	0.0502084	1.02726	0.304298	0.999901
ARL15	78.4644	0.0615102	0.0598915	-1.02703	0.304408	0.999901
GFAP	6.01343	0.0271181	0.026408	-1.02689	0.304473	0.999901
FAM32A	620.509	-0.0632728	0.0616186	1.02684	0.304494	0.999901
MIR765	0.472979	0.00656919	0.00639815	-1.02673	0.304547	0.999901
FRAT1	26.4375	0.0433259	0.0422014	-1.02665	0.304587	0.999901
NAT2	0.68899	-0.00974043	0.00948792	1.02661	0.304603	0.999901
KCTD2	417.926	0.0623842	0.0607677	-1.0266	0.304608	0.999901
LINC01115	0.53735	0.00656603	0.00639733	-1.02637	0.304717	0.999901
HCCS	165.856	0.0687756	0.0670087	-1.02637	0.304718	0.999901
MRE11A	169.385	0.0658839	0.0641923	-1.02635	0.304726	0.999901
SCO1	211.043	0.0676608	0.0659253	-1.02632	0.304739	0.999901
BAALC-AS2	0.537088	0.00656518	0.00639692	-1.0263	0.304748	0.999901
LANCL3	18.4284	-0.0385625	0.0375751	1.02628	0.304761	0.999901
ZNF142	320.905	-0.0689427	0.0672217	1.0256	0.305079	0.999901
MIR563	0.494972	-0.00659245	0.00642858	1.02549	0.305132	0.999901
MTVR2	0.494972	-0.00659245	0.00642858	1.02549	0.305132	0.999901
SNRPE	92.2219	-0.0620155	0.0604774	1.02543	0.305159	0.999901
MAGI1	295.563	-0.0680374	0.066364	1.02522	0.305261	0.999901
TRIP10	614.213	0.0602836	0.0588038	-1.02517	0.305285	0.999901
SNORA76A	0.743204	-0.0100209	0.00977622	1.02503	0.305348	0.999901
ACAD9	379.993	0.0635073	0.0619599	-1.02497	0.305375	0.999901
NPEPL1	12.278	0.0399422	0.0389753	-1.02481	0.305454	0.999901
ZNF821	81.181	-0.0649396	0.0633677	1.02481	0.305454	0.999901
TAS1R3	7.69972	0.0332518	0.0324602	-1.02439	0.305652	0.999901
AKAP3	8.05798	-0.0281179	0.0274488	1.02437	0.305658	0.999901
IKBKE	104.075	0.065945	0.0643795	-1.02432	0.305686	0.999901
ACTR5	72.6115	-0.0656088	0.0640877	1.02374	0.30596	0.999901
PITPNA	786.618	0.0569546	0.0556359	-1.0237	0.305976	0.999901
SNHG21	10.668	0.0395198	0.0386098	-1.02357	0.306039	0.999901
TRAF7	1103.85	0.0611832	0.0597947	-1.02322	0.306204	0.999901
LOC102724301	1.61774	0.0164936	0.0161232	-1.02297	0.30632	0.999901
TMEM194B	71.5261	0.062781	0.0613751	-1.02291	0.306351	0.999901
DDX27	457.622	0.066252	0.0647734	-1.02283	0.306389	0.999901
SNORD60	6.71639	0.0266418	0.0260492	-1.02275	0.306426	0.999901
FAM45A	1.88393	0.0128889	0.0126034	-1.02265	0.306471	0.999901
CCDC30	14.28	-0.0386333	0.0377845	1.02246	0.306561	0.999901
SLC25A34	28.3292	0.0442929	0.0433247	-1.02235	0.306617	0.999901
ADCK4	250.11	0.0686143	0.0671378	-1.02199	0.306784	0.999901
MRPL45P2	27.144	-0.0495624	0.0484991	1.02192	0.306817	0.999901
CTAGE8	1.67786	0.0154023	0.0150722	-1.0219	0.306827	0.999901
SLC15A2	9.49571	-0.0348397	0.0340941	1.02187	0.306843	0.999901
HIST1H2AI	0.485884	-0.0065462	0.00640615	1.02186	0.306846	0.999901
LOC100996324	0.485884	-0.0065462	0.00640615	1.02186	0.306846	0.999901
PRKCA-AS1	0.761876	-0.00999303	0.00977987	1.0218	0.306878	0.999901
CTSK	5932.34	-0.0666355	0.0652183	1.02173	0.306908	0.999901
SLC13A4	27.7982	0.0522939	0.0511899	-1.02157	0.306986	0.999901
R3HCC1L	142.324	-0.0659234	0.0645334	1.02154	0.306999	0.999901
LGI3	0.522762	0.00650374	0.00636696	-1.02148	0.307026	0.999901
LRRC75B	57.5273	0.058274	0.0571121	-1.02034	0.307566	0.999901
SALRNA1	1.89642	-0.0138498	0.0135739	1.02033	0.307572	0.999901
PTPRQ	8.44259	0.027032	0.0264953	-1.02026	0.307607	0.999901
NDUFA4L2	89.0794	0.0490372	0.048066	-1.02021	0.307631	0.999901
DPM1	270.188	-0.0673155	0.0660121	1.01975	0.307849	0.999901
CCDC144NL-AS1	3.40504	-0.023207	0.0227611	1.01959	0.307922	0.999901
SNRPF	160.106	-0.0680491	0.0667433	1.01956	0.307935	0.999901
ASB8	238.395	-0.066321	0.0650561	1.01944	0.307992	0.999901
GNG13	0.620815	0.0104433	0.0102442	-1.01943	0.307998	0.999901
ADCK2	173.932	0.0662956	0.0650543	-1.01908	0.308164	0.999901
SYT17	8.72892	-0.024244	0.0237905	1.01907	0.308172	0.999901
FAM92B	0.729273	-0.00995652	0.00977279	1.0188	0.308298	0.999901
GCSHP3	53.6207	0.0626116	0.0614614	-1.01871	0.308339	0.999901
C10orf2	78.7229	-0.0636585	0.0624899	1.0187	0.308345	0.999901
MTFP1	35.2575	0.0506635	0.0497356	-1.01865	0.308367	0.999901
LINC00888	20.2432	-0.0401553	0.0394289	1.01842	0.308476	0.999901
ERCC6	191.226	0.0679819	0.0667586	-1.01832	0.308524	0.999901
ATF7IP2	51.6579	0.0601133	0.0590718	-1.01763	0.308853	0.999901
RARA-AS1	34.2476	0.0492882	0.0484574	-1.01714	0.309085	0.999901
LOC100130476	5.20645	-0.0280911	0.0276229	1.01695	0.309178	0.999901
GPR17	1.03987	0.0129627	0.0127493	-1.01674	0.309278	0.999901
MYEOV	0.50855	0.00644017	0.0063358	-1.01647	0.309404	0.999901
PAG1	50.7219	-0.0491348	0.0483445	1.01635	0.309465	0.999901
SNORA67	15.7453	0.0429858	0.0422957	-1.01632	0.309478	0.999901
TDP2	318.025	0.0669617	0.0659047	-1.01604	0.309611	0.999901
NPL	19.0993	0.0420514	0.0413941	-1.01588	0.309687	0.999901
EXOSC2	129.788	-0.0682784	0.0672609	1.01513	0.310045	0.999901
FUT2	6.74948	0.0299801	0.0295348	-1.01508	0.310069	0.999901
ZMYM2	708.017	0.0619211	0.0610018	-1.01507	0.310072	0.999901
SIRT4	11.852	0.0358285	0.0352974	-1.01505	0.310084	0.999901
MAU2	690.253	0.0579816	0.0571287	-1.01493	0.31014	0.999901
METTL21A	76.7169	-0.0654202	0.0644721	1.01471	0.310246	0.999901
EME2	46.183	0.0548741	0.0540898	-1.0145	0.310344	0.999901
DDIT4	510.787	0.0553395	0.054572	-1.01406	0.310552	0.999901
ZBTB14	141.742	0.0676769	0.0667514	-1.01386	0.310647	0.999901
ZNF782	29.0824	0.054489	0.0537453	-1.01384	0.31066	0.999901
IMPACT	397.092	0.0679113	0.067021	-1.01328	0.310925	0.999901
MCOLN3	79.009	-0.0602521	0.0594748	1.01307	0.311027	0.999901
DOHH	173.302	-0.0675537	0.0666884	1.01297	0.311072	0.999901
KDM2B	329.737	0.0660182	0.0651912	-1.01269	0.31121	0.999901
FANCG	106.643	0.0672157	0.0663816	-1.01256	0.311268	0.999901
LIX1L	589.37	-0.062529	0.0617565	1.01251	0.311295	0.999901
FRG1B	176.767	-0.0680774	0.0672418	1.01243	0.311334	0.999901
TXNIP	1240.36	0.0574703	0.0568026	-1.01175	0.311656	0.999901
ABCG2	12.8779	-0.0394107	0.0389582	1.01162	0.311722	0.999901
ZNF649	89.9396	0.0624279	0.0617159	-1.01154	0.311759	0.999901
CHEK2	94.8937	0.0612515	0.0605699	-1.01125	0.311895	0.999901
CDRT4	0.494224	0.00637335	0.0063029	-1.01118	0.311931	0.999901
SUSD6	723.876	0.0679349	0.0671935	-1.01103	0.312	0.999901
ZHX1-C8orf76	1.4027	-0.0137855	0.0136368	1.0109	0.312063	0.999901
MIR3145	0.761128	0.00963764	0.00953806	-1.01044	0.312284	0.999901
LOC158960	23.17	-0.0430495	0.042612	1.01027	0.312367	0.999901
C4orf27	180.065	0.0676487	0.0670025	-1.00964	0.312666	0.999901
AHSA1	641.611	-0.0634241	0.0628759	1.00872	0.31311	0.999901
GLTSCR1	191.003	0.0678461	0.0672727	-1.00852	0.313203	0.999901
NUDT15	135.914	0.066269	0.0657174	-1.00839	0.313265	0.999901
FAM160A2	375.137	0.0678337	0.0672751	-1.0083	0.313309	0.999901
PGAP1	450.636	-0.066721	0.066178	1.00821	0.313355	0.999901
PSMC6	285.911	-0.0674255	0.0668811	1.00814	0.313387	0.999901
POLRMT	386.177	0.0665457	0.0660377	-1.00769	0.313602	0.999901
POC1A	23.4103	0.0482627	0.0479023	-1.00752	0.313684	0.999901
OAS3	245.078	-0.0621258	0.0616649	1.00747	0.313707	0.999901
GSN-AS1	602.089	-0.0670822	0.0665859	1.00745	0.313717	0.999901
ARNTL	206.799	-0.0666084	0.0661231	1.00734	0.313772	0.999901
POLR3A	407.143	-0.0665041	0.0660334	1.00713	0.313874	0.999901
C17orf100	20.7482	0.0448112	0.0444984	-1.00703	0.31392	0.999901
CPSF7	783.901	0.0615491	0.0611277	-1.00689	0.313987	0.999901
COX19	135.535	-0.0670021	0.0665676	1.00653	0.314162	0.999901
SLC12A2	289.597	-0.0672201	0.0668104	1.00613	0.314352	0.999901
ZNF227	134.882	-0.0664718	0.0660787	1.00595	0.31444	0.999901
NDST1	2111.93	0.0669988	0.0666028	-1.00595	0.314441	0.999901
LOC101926935	3.26493	-0.016907	0.016808	1.0059	0.314466	0.999901
CTB-178M22.2	0.775223	0.00959734	0.00954161	-1.00584	0.314492	0.999901
AQP7	3.1924	-0.015093	0.0150093	1.00557	0.31462	0.999901
MAP2K4	355.071	0.0642023	0.0638749	-1.00512	0.314837	0.999901
RHOF	92.8238	0.0583633	0.0580794	-1.00489	0.314951	0.999901
LAS1L	263.062	0.0665397	0.0662202	-1.00483	0.314981	0.999901
KIAA0101	14.2471	0.0248063	0.0246982	-1.00438	0.315197	0.999901
MIR3671	1.02734	0.0111216	0.0110768	-1.00404	0.31536	0.999901
ERMARD	190.234	0.0674112	0.0671527	-1.00385	0.315451	0.999901
SCARNA17	7.1498	-0.0277097	0.0276077	1.0037	0.315525	0.999901
LOC101929140	6.18663	-0.0301162	0.0300124	1.00346	0.31564	0.999901
ZNF132	52.8334	-0.0589928	0.0588016	1.00325	0.31574	0.999901
HMGN5	47.3178	0.054939	0.0547748	-1.003	0.315862	0.999901
MTG2	216.582	0.066677	0.0665492	-1.00192	0.316382	0.999901
LOC403323	11.1147	-0.0329167	0.0328717	1.00137	0.31665	0.999901
FAM66E	3.00752	-0.0194982	0.0194771	1.00108	0.316786	0.999901
MKNK1-AS1	63.8569	0.0634457	0.0633777	-1.00107	0.316792	0.999901
KIF9-AS1	34.4843	-0.0541991	0.0541444	1.00101	0.316822	0.999901
PLCD4	156.472	-0.0672131	0.0671574	1.00083	0.31691	0.999901
LOC100507534	1.16851	0.0114826	0.0114734	-1.0008	0.316922	0.999901
EXOSC1	193.674	-0.0659969	0.0659466	1.00076	0.316942	0.999901
GPD1L	165.81	-0.0650785	0.0650624	1.00025	0.31719	0.999901
CHRNA9	0.792521	-0.00951209	0.00950979	1.00024	0.317194	0.999901
RPS6KB1	458.871	0.0666383	0.06663	-1.00012	0.31725	0.999901
MIR8072	3.59203	0.0219482	0.0219477	-1.00002	0.3173	0.999901
DDX11L5	1.79874	0.0140968	0.0140968	-0.999998	0.317311	0.999901
PEX1	217.777	0.0672082	0.067217	-0.999869	0.317374	0.999901
ORAOV1	113.118	0.0670283	0.067049	-0.999691	0.31746	0.999901
COLQ	53.3676	-0.0576318	0.0576549	0.999599	0.317505	0.999901
BCAT2	211.827	0.0672273	0.0672593	-0.999525	0.31754	0.999901
LOC100287042	17.6213	0.0370797	0.0371011	-0.999425	0.317589	0.999901
CDC25A	7.4747	0.0289803	0.0289996	-0.999335	0.317633	0.999901
CEP63	289.869	0.0659609	0.0660184	-0.99913	0.317732	0.999901
LOC642852	324.619	0.064357	0.0644251	-0.998942	0.317823	0.999901
RNF170	286.931	-0.0634122	0.0634939	0.998712	0.317934	0.999901
LRP4	313.183	0.0664325	0.066527	-0.998579	0.317999	0.999901
ADCY4	74.138	0.0481638	0.0482376	-0.99847	0.318052	0.999901
IL5	0.722371	-0.00975489	0.00977263	0.998185	0.31819	0.999901
ZNF891	15.7299	-0.0359829	0.0360488	0.998172	0.318196	0.999901
KIAA1109	1599.82	0.0600989	0.0602194	-0.997998	0.31828	0.999901
APLN	20.3526	0.0343523	0.0344414	-0.997412	0.318565	0.999901
MAT2B	492.965	-0.0666453	0.0668337	0.99718	0.318677	0.999901
LOC100130451	0.459028	0.00619055	0.00621199	-0.996548	0.318984	0.999901
USP12-AS1	0.459028	0.00619055	0.00621199	-0.996548	0.318984	0.999901
CCSAP	99.0707	0.06586	0.0660891	-0.996534	0.318991	0.999901
HOXC13-AS	0.481373	-0.00622583	0.00624755	0.996523	0.318996	0.999901
LINC00470	0.481373	-0.00622583	0.00624755	0.996523	0.318996	0.999901
MIR3128	0.481373	-0.00622583	0.00624755	0.996523	0.318996	0.999901
MRPL23	210.32	0.0666564	0.0668971	-0.996401	0.319055	0.999901
AGFG1	690.642	0.0594189	0.0596338	-0.996397	0.319057	0.999901
DIP2A-IT1	0.783433	-0.00947308	0.00950745	0.996385	0.319063	0.999901
RGS9	1.41399	0.012042	0.012086	-0.996361	0.319075	0.999901
LMO7DN-IT1	0.717827	-0.00973374	0.00977104	0.996182	0.319162	0.999901
SPSB3	339.551	0.0636585	0.0639231	-0.99586	0.319318	0.999901
RGS20	14.1284	-0.0244875	0.0245961	0.995584	0.319453	0.999901
ZNF551	56.3455	-0.0489524	0.0491697	0.995582	0.319453	0.999901
C11orf98	0.981583	-0.0116282	0.0116825	0.99535	0.319566	0.999901
SNORD68	1.37494	-0.0134211	0.0134864	0.99516	0.319658	0.999901
CLEC11A	954.055	0.0664033	0.0667361	-0.995013	0.31973	0.999901
C10orf95	10.1265	0.0310438	0.0312083	-0.994727	0.319869	0.999901
ALX3	39.4624	0.0527049	0.0529848	-0.994718	0.319873	0.999901
CH25H	196.282	-0.0597929	0.0601104	0.994717	0.319874	0.999901
NOL9	232.605	0.066063	0.0664313	-0.994455	0.320001	0.999901
MAGEH1	214.302	-0.0668875	0.0672727	0.994274	0.320089	0.999901
ZNF548	192.292	-0.0534749	0.0538306	0.993392	0.320519	0.999901
CEP83-AS1	2.62662	-0.0192157	0.0193452	0.993307	0.32056	0.999901
SLC1A2	6.71717	-0.0309068	0.0311246	0.993002	0.320709	0.999901
MIR3187	2.13974	0.0138874	0.0139863	-0.99293	0.320744	0.999901
PPIL4	392.474	0.0665892	0.0671091	-0.992253	0.321074	0.999901
ZNF136	99.6524	-0.0600939	0.0605675	0.99218	0.32111	0.999901
NIM1K	35.2939	0.0483777	0.0487785	-0.991783	0.321303	0.999901
AP4B1-AS1	78.6019	-0.0529255	0.0533672	0.991723	0.321333	0.999901
FAM185A	38.3319	-0.0582585	0.0587462	0.991699	0.321345	0.999901
PUS7	149.289	-0.0634403	0.0639982	0.991281	0.321548	0.999901
CEL	13.0101	0.0340375	0.0343464	-0.991007	0.321682	0.999901
SLC30A5	825.989	-0.0606147	0.0611694	0.990933	0.321718	0.999901
NHLRC3	250.461	-0.0665727	0.0671931	0.990767	0.321799	0.999901
DMRTA2	0.466846	-0.00615144	0.00621038	0.99051	0.321925	0.999901
PDZD11	281.509	-0.0666071	0.067272	0.990117	0.322117	0.999901
MIR3613	1.16002	-0.0113201	0.0114404	0.989485	0.322426	0.999901
HECTD2	221.59	-0.0645262	0.0652221	0.989332	0.322501	0.999901
AGAP2-AS1	149.736	0.0638193	0.0645183	-0.989166	0.322582	0.999901
SMIM4	67.5012	0.0571061	0.0577465	-0.98891	0.322707	0.999901
LOC101927811	32.6445	-0.0498695	0.0504399	0.988692	0.322814	0.999901
LOC101929897	0.462302	-0.00612748	0.00619834	0.988568	0.322875	0.999901
MIR302A	0.462302	-0.00612748	0.00619834	0.988568	0.322875	0.999901
MATN1	8.40741	0.0328206	0.0332074	-0.988353	0.32298	0.999901
CABP7	61.0181	0.0591689	0.0598683	-0.988318	0.322997	0.999901
TAL2	1.44516	-0.0135915	0.0137529	0.98826	0.323025	0.999901
USP3-AS1	80.7221	0.0562715	0.0569412	-0.988239	0.323036	0.999901
RPS18P9	201.11	0.0640223	0.0647925	-0.988112	0.323098	0.999901
TMEM184A	77.5562	-0.0615717	0.0623247	0.987918	0.323193	0.999901
MXI1	483.718	0.0598289	0.0605677	-0.987803	0.323249	0.999901
WFDC3	6.55196	-0.0226581	0.0229465	0.987433	0.32343	0.999901
CD200	67.7044	0.0377914	0.0382753	-0.987358	0.323467	0.999901
SNHG24	8.40582	0.0294181	0.0298054	-0.987005	0.32364	0.999901
SLC22A5	56.521	0.0570232	0.0577826	-0.986857	0.323713	0.999901
CHRNB1	56.6608	-0.059605	0.0604024	0.986799	0.323741	0.999901
NUDT9P1	1.98813	-0.0168055	0.0170339	0.98659	0.323844	0.999901
LOC101928063	39.673	-0.0505695	0.0512612	0.986506	0.323885	0.999901
UBE2E2	193.086	-0.0657373	0.0666397	0.986458	0.323908	0.999901
ZC3H13	861.031	-0.0618791	0.0627298	0.986438	0.323918	0.999901
SERPINE3	4.31292	0.0223257	0.022635	-0.986335	0.323969	0.999901
CCT5	1117.28	-0.0558614	0.0566449	0.986168	0.324051	0.999901
LOC100506457	2.12929	0.0122621	0.0124343	-0.98615	0.32406	0.999901
NMI	147.578	-0.062115	0.0630199	0.985641	0.324309	0.999901
POPDC2	9.60966	0.0307847	0.0312445	-0.985286	0.324484	0.999901
TRIM63	0.453247	-0.00608003	0.00617444	0.984709	0.324767	0.999901
C9orf50	6.99513	-0.0298009	0.030264	0.984697	0.324773	0.999901
GTF3C4	256.266	0.0642781	0.0652829	-0.984608	0.324817	0.999901
GOLGA2P5	10.8088	0.0339284	0.0344658	-0.984407	0.324915	0.999901
INTS12	147.044	-0.0661935	0.0672428	0.984395	0.324921	0.999901
FAM86B3P	24.6882	0.0488659	0.0496445	-0.984317	0.32496	0.999901
ALDH8A1	4.72818	-0.020264	0.020588	0.984265	0.324985	0.999901
GALNT12	8.75319	0.023458	0.023838	-0.984061	0.325086	0.999901
MTOR	554.253	-0.0641788	0.0652185	0.984058	0.325087	0.999901
PKD1L1	1.14297	-0.0100311	0.0101939	0.984033	0.325099	0.999901
G3BP1	972.734	-0.0523051	0.0531539	0.984031	0.3251	0.999901
SOWAHD	1.40335	0.01203	0.0122254	-0.984013	0.325109	0.999901
PMVK	299.779	0.0616699	0.0627032	-0.983521	0.325351	0.999901
TBX2-AS1	32.6735	-0.0542839	0.0551954	0.983485	0.325369	0.999901
LOC101929767	19.3981	-0.0439563	0.044725	0.982813	0.3257	0.999901
LSR	12.4342	0.0367305	0.0373812	-0.982591	0.325809	0.999901
ZDHHC24	126.682	0.064791	0.0659447	-0.982505	0.325851	0.999901
HDGFRP2	675.31	0.0602136	0.0612864	-0.982497	0.325855	0.999901
RAD9B	5.94722	0.02475	0.0252014	-0.98209	0.326056	0.999901
YEATS4	73.2995	-0.058774	0.0598472	0.982067	0.326067	0.999901
MSANTD4	242.579	-0.0650128	0.0662142	0.981855	0.326171	0.999901
CORO7	16.5313	0.0378043	0.0385039	-0.98183	0.326184	0.999901
SLC29A2	38.2266	-0.0456768	0.0465341	0.981578	0.326308	0.999901
LOC100506747	0.723183	0.00934935	0.00952577	-0.981479	0.326356	0.999901
STAG3L5P-PVRIG2P-PILRB	75.2389	0.0614726	0.0626567	-0.981102	0.326543	0.999901
TIPARP	1466.41	-0.0630393	0.0642649	0.980929	0.326628	0.999901
TARID	9.89933	-0.0301519	0.0307441	0.980737	0.326722	0.999901
PABPC4L	46.3836	-0.0542225	0.055305	0.980427	0.326876	0.999901
LOC101927418	1.83067	0.0166046	0.0169367	-0.980393	0.326892	0.999901
TRAIP	24.5229	0.0386681	0.0394457	-0.980288	0.326944	0.999901
LOC101927190	0.443562	-0.00602498	0.00614661	0.980213	0.326981	0.999901
SUGP1	234.003	0.0659105	0.067263	-0.979891	0.32714	0.999901
TTK	13.7478	0.0330637	0.0337467	-0.979759	0.327205	0.999901
LOC101409256	2.68589	0.0165966	0.0169402	-0.979716	0.327227	0.999901
AMACR	10.857	-0.0336414	0.0343437	0.979549	0.327309	0.999901
SSPO	9.48324	0.0282644	0.0288683	-0.979083	0.327539	0.999901
APOBR	1.01256	-0.012458	0.0127254	0.978985	0.327587	0.999901
IFT22	217.02	-0.0656772	0.0670909	0.978929	0.327615	0.999901
HIST1H1E	0.981982	-0.0124732	0.012742	0.978905	0.327627	0.999901
LOC101448202	502.421	0.065568	0.0669903	-0.978768	0.327694	0.999901
NECAB2	4.90137	-0.0263721	0.0269551	0.978373	0.32789	0.999901
OVCA2	34.7173	0.0523668	0.0535359	-0.978163	0.327994	0.999901
BCKDHB	206.559	-0.0637904	0.0652207	0.978069	0.32804	0.999901
SPATA24	11.5351	0.032973	0.0337177	-0.977916	0.328116	0.999901
C17orf80	239.242	0.0654549	0.0669358	-0.977875	0.328136	0.999901
CYTH1	235.321	0.0653031	0.0667869	-0.977784	0.328181	0.999901
TFDP2	621.405	-0.0627425	0.0641713	0.977735	0.328205	0.999901
TNFSF4	24.7882	0.0465895	0.0476526	-0.97769	0.328227	0.999901
LOC101927472	5.59081	0.0239489	0.0245088	-0.977154	0.328493	0.999901
ARMC2	40.1813	0.0527996	0.0540692	-0.976519	0.328807	0.999901
YBX3P1	176.23	0.06095	0.0624314	-0.976273	0.328929	0.999901
TMPRSS11D	2.61178	-0.0178017	0.0182409	0.975922	0.329103	0.999901
MIR1245A	0.84103	0.00808082	0.00828095	-0.975832	0.329148	0.999901
NIT2	254.268	-0.0634912	0.0650677	0.975772	0.329177	0.999901
FERMT3	17.9934	0.0377004	0.0386413	-0.975649	0.329238	0.999901
H6PD	2591.54	0.0509616	0.0522477	-0.975385	0.32937	0.999901
NCLN	839.422	0.0561624	0.0575997	-0.975046	0.329537	0.999901
ATG12	657.596	-0.0589065	0.0604194	0.97496	0.32958	0.999901
TTC21B-AS1	1.3515	0.0120062	0.0123197	-0.974554	0.329782	0.999901
AMMECR1L	424.94	0.0647977	0.0665227	-0.974069	0.330022	0.999901
LINC00535	4.18683	0.0242506	0.0248989	-0.973964	0.330075	0.999901
SNORD43	2.8022	0.0185483	0.0190544	-0.97344	0.330335	0.999901
SPATA4	0.934718	-0.0114095	0.0117222	0.973322	0.330393	0.999901
FCF1	415.676	-0.0600947	0.0617516	0.973168	0.33047	0.999901
UBL5	480.752	0.0612809	0.062982	-0.97299	0.330558	0.999901
ZNF382	35.0496	-0.0540207	0.0555309	0.972805	0.33065	0.999901
HTR1F	3.53789	-0.0145291	0.0149388	0.972575	0.330765	0.999901
HIC2	72.0518	0.0617695	0.0635414	-0.972113	0.330994	0.999901
SPG20-AS1	16.2382	0.0390759	0.0402012	-0.972007	0.331047	0.999901
EYS	9.18722	-0.032641	0.0335848	0.971899	0.331101	0.999901
HIAT1	712.071	-0.0652859	0.0671777	0.971839	0.331131	0.999901
INTS9	138.429	-0.0635649	0.0654435	0.971294	0.331402	0.999901
TLK2	340.301	0.0628991	0.0647766	-0.971016	0.33154	0.999901
SERPINA5	9.40323	-0.0240206	0.0247382	0.970992	0.331552	0.999901
TMCC1-AS1	17.1537	0.0317269	0.0326797	-0.970845	0.331626	0.999901
LOC100289495	15.1252	0.0354583	0.0365301	-0.970662	0.331717	0.999901
KIF3B	994.61	-0.0524841	0.0540912	0.97029	0.331902	0.999901
TCTE1	1.88255	0.0160285	0.0165236	-0.970037	0.332028	0.999901
ADAT2	82.7514	-0.0588191	0.0606527	0.969769	0.332162	0.999901
PXN-AS1	131.998	-0.0650762	0.0671238	0.969495	0.332298	0.999901
KRT19	95.5935	0.0420074	0.0433481	-0.969073	0.332509	0.999901
COX7A1	140.464	-0.0638061	0.0658593	0.968824	0.332633	0.999901
CCDC17	8.41884	0.0320396	0.0331075	-0.967746	0.333171	0.999901
SRPR	1725.46	-0.0491365	0.0507964	0.967323	0.333383	0.999901
SLC14A1	5732.61	-0.0627824	0.0649219	0.967046	0.333521	0.999901
KCTD21	132.704	-0.0625155	0.0646858	0.966448	0.33382	0.999901
MAPK1	1489.44	-0.0525576	0.0543871	0.966361	0.333863	0.999901
DAXX	4.87827	-0.0216499	0.0224137	0.965921	0.334084	0.999901
SOX8	3.03424	-0.0175707	0.0181965	0.965608	0.33424	0.999901
LRRC8D	197.62	0.0594089	0.061535	-0.965449	0.33432	0.999901
ZNF484	66.4138	-0.0570707	0.0591388	0.96503	0.33453	0.999901
ZBTB1	631.912	-0.0615599	0.0637918	0.965012	0.334539	0.999901
BMF	282.157	-0.0601274	0.0623096	0.964979	0.334555	0.999901
SAMD11	292.97	-0.0614806	0.063725	0.96478	0.334655	0.999901
ZSWIM2	0.874411	0.00790774	0.00819647	-0.964773	0.334658	0.999901
BCL7B	411.67	-0.0648402	0.0672114	0.964721	0.334685	0.999901
EIF3J-AS1	90.3715	0.0624514	0.0647449	-0.964576	0.334757	0.999901
LINC00475	16.6076	-0.0299543	0.0310623	0.96433	0.33488	0.999901
RPL22	2178.27	-0.0521237	0.0540547	0.964278	0.334907	0.999901
C12orf71	1.58687	0.0147997	0.0153497	-0.964174	0.334959	0.999901
CNPPD1	447.452	-0.0635572	0.0659208	0.964145	0.334973	0.999901
ERCC2	332.878	0.0645848	0.066999	-0.963967	0.335063	0.999901
C19orf38	4.10014	0.0229895	0.0238511	-0.963877	0.335108	0.999901
TRIM54	1.50344	0.0114718	0.0119084	-0.963336	0.335379	0.999901
PNPT1	227.972	-0.0647326	0.0672206	0.962987	0.335554	0.999901
TNRC6A	1098.01	0.0606821	0.0630259	-0.962811	0.335642	0.999901
GSTM4	140.786	0.0620037	0.0643993	-0.962802	0.335647	0.999901
DNAAF5	333.608	0.0605224	0.0628626	-0.962773	0.335662	0.999901
WDR53	64.582	0.059919	0.0622722	-0.962212	0.335943	0.999901
CCDC77	89.5532	-0.0626539	0.0651193	0.96214	0.335979	0.999901
LYPLA1	350.114	0.0639199	0.0664585	-0.961801	0.336149	0.999901
LYRM5	163.555	0.0637796	0.0663201	-0.961693	0.336204	0.999901
CEP57L1	102.984	0.0644096	0.067023	-0.961007	0.336549	0.999901
COX8A	518.197	0.0575699	0.0599093	-0.960951	0.336577	0.999901
PARP2	151.773	0.062696	0.0652505	-0.96085	0.336627	0.999901
EML5	24.0469	-0.0433165	0.045098	0.960497	0.336805	0.999901
FOXL1	41.5763	-0.0539104	0.0561595	0.959952	0.337079	0.999901
SF3B5	605.729	-0.0593596	0.0618458	0.9598	0.337156	0.999901
TUSC2	203.561	0.0635847	0.0662505	-0.959761	0.337175	0.999901
MTURN	348.939	-0.0631433	0.0658051	0.959551	0.337281	0.999901
PIAS1	215.166	0.0644206	0.0671444	-0.959433	0.337341	0.999901
PLEKHN1	20.956	0.0452246	0.0471401	-0.959366	0.337375	0.999901
HINFP	92.8393	0.062863	0.0655263	-0.959355	0.33738	0.999901
PIK3R3	143.922	-0.0645112	0.0672783	0.958871	0.337624	0.999901
MCU	226.586	0.0640134	0.0667648	-0.958791	0.337664	0.999901
CNIH2	10.984	0.0328129	0.0342338	-0.958495	0.337813	0.999901
LOC100506730	32.9749	0.0488697	0.0509904	-0.95841	0.337856	0.999901
PGR	3.54022	-0.0137571	0.0143602	0.958005	0.33806	0.999901
ZNF773	80.6953	-0.0584345	0.0609977	0.957977	0.338074	0.999901
CEP57	413.427	0.0603509	0.0630093	-0.957809	0.338159	0.999901
NDRG2	9.87508	-0.0271487	0.0283519	0.95756	0.338285	0.999901
CAND2	47.651	-0.0426575	0.0445492	0.957539	0.338295	0.999901
ARID3B	25.999	0.0500987	0.0523388	-0.9572	0.338467	0.999901
TMEM106B	963.245	-0.0601125	0.0628258	0.956812	0.338662	0.999901
ABCA17P	4.15826	-0.0240854	0.025185	0.956336	0.338902	0.999901
CCDC64B	11.1448	0.018837	0.0197066	-0.955873	0.339137	0.999901
MIR3064	33.9955	0.0402555	0.0421186	-0.955765	0.339191	0.999901
ARMC8	313.728	-0.0616574	0.0645119	0.955752	0.339197	0.999901
C10orf105	3.71008	0.0166688	0.0174422	-0.955658	0.339245	0.999901
SDHB	278.35	-0.0631421	0.0660729	0.955643	0.339253	0.999901
MYLPF	2.47482	-0.0160026	0.0167458	0.955619	0.339265	0.999901
MIF4GD	81.2694	0.057041	0.0597067	-0.955353	0.339399	0.999901
CD302	2.10111	-0.0113419	0.0118739	0.955198	0.339478	0.999901
LOC102724058	1.98027	-0.0139526	0.0146098	0.955019	0.339568	0.999901
TP53AIP1	1.60825	0.0146051	0.0152934	-0.954993	0.339581	0.999901
ENTPD3	23.9038	0.0391244	0.0409719	-0.954906	0.339625	0.999901
DCAF13P3	2.77846	0.0163667	0.0171398	-0.954892	0.339632	0.999901
MTRNR2L9	2.31082	0.0171438	0.0179573	-0.954695	0.339732	0.999901
FBXO8	167.147	-0.0642058	0.0672566	0.95464	0.33976	0.999901
NTRK1	116.815	0.0491519	0.0514902	-0.954587	0.339787	0.999901
TMEM33	472.577	0.0592425	0.0620714	-0.954426	0.339868	0.999901
USP45	172.097	0.0638988	0.0669736	-0.954089	0.340039	0.999901
SLC19A1	75.2327	0.0413072	0.0433213	-0.953508	0.340333	0.999901
ATM	1466.89	0.050503	0.052984	-0.953175	0.340501	0.999901
ACOT4	11.1546	0.0248388	0.0260622	-0.953059	0.34056	0.999901
NPM2	2.4625	0.0173204	0.0181783	-0.95281	0.340686	0.999901
SLC25A46	612.541	-0.0588881	0.061828	0.95245	0.340869	0.999901
JAGN1	210.923	-0.0640177	0.0672167	0.952408	0.34089	0.999901
DYNLL1-AS1	68.767	-0.0604396	0.0634811	0.952088	0.341052	0.999901
ADAMTS8	11.4032	0.0143537	0.0150798	-0.95185	0.341173	0.999901
PIWIL4	47.6329	-0.0434793	0.0456814	0.951795	0.341201	0.999901
EDN1	8.39041	-0.0308116	0.0323876	0.951339	0.341432	0.999901
LAMB2P1	3.77928	0.0173668	0.0182558	-0.951303	0.341451	0.999901
SNORD98	1.04451	-0.0104778	0.0110142	0.951293	0.341456	0.999901
ADNP	1032.51	-0.0508336	0.0534486	0.951074	0.341567	0.999901
ARL10	148.343	0.0617709	0.0649607	-0.950896	0.341657	0.999901
HIST1H2AE	0.405964	0.00563595	0.00592765	-0.950789	0.341711	0.999901
DOCK6	357.685	0.0631638	0.0664623	-0.95037	0.341924	0.999901
EI24	977.228	-0.0522456	0.0549766	0.950325	0.341947	0.999901
LINC00504	4.42937	-0.017782	0.0187124	0.950281	0.341969	0.999901
NOP10	413.456	-0.0638554	0.0671979	0.950258	0.341981	0.999901
LINC00506	9.99322	-0.034723	0.0365451	0.950142	0.34204	0.999901
RAP2C	486.931	-0.0595518	0.0626848	0.95002	0.342102	0.999901
NAMA	1.83628	0.0129014	0.0135805	-0.949992	0.342116	0.999901
FAM8A1	927.679	-0.0582474	0.0613231	0.949844	0.342191	0.999901
PYROXD1	502.279	-0.0613661	0.0646087	0.949811	0.342208	0.999901
CBX2	19.4458	0.027841	0.029313	-0.949781	0.342224	0.999901
MYO3B	1.31171	-0.0129133	0.0135972	0.949704	0.342263	0.999901
CLEC18B	2.00752	-0.0139525	0.0146919	0.949676	0.342277	0.999901
LYRM9	67.4658	-0.0526409	0.0554461	0.949408	0.342413	0.999901
VAMP5	432.434	-0.0577092	0.0607857	0.949387	0.342424	0.999901
RNFT2	4.11165	0.0216297	0.0227836	-0.949355	0.34244	0.999901
MX2	77.3179	-0.039154	0.041262	0.948913	0.342665	0.999901
LOC284009	1.8022	0.015901	0.0167607	-0.948705	0.342771	0.999901
GNN	4.29744	-0.0197764	0.0208507	0.948477	0.342887	0.999901
LOC100506674	10.8311	0.0305221	0.0321801	-0.948476	0.342887	0.999901
AMELX	0.401189	0.00560762	0.00591276	-0.948392	0.34293	0.999901
ATP6V0CP3	0.401189	0.00560762	0.00591276	-0.948392	0.34293	0.999901
LOC101928460	0.401189	0.00560762	0.00591276	-0.948392	0.34293	0.999901
LOC102724589	0.401189	0.00560762	0.00591276	-0.948392	0.34293	0.999901
NTF4	0.401189	0.00560762	0.00591276	-0.948392	0.34293	0.999901
SNORD113-9	0.401189	0.00560762	0.00591276	-0.948392	0.34293	0.999901
HIST1H4I	1.3579	0.0113032	0.0119213	-0.94815	0.343053	0.999901
MMP3	12.2472	0.0300284	0.0316779	-0.947928	0.343166	0.999901
CHD9	1400.51	-0.0536799	0.0566351	0.947819	0.343221	0.999901
LSM7	287.3	-0.0637609	0.0672781	0.947721	0.343272	0.999901
HIST1H2AG	2.39786	-0.0154688	0.016328	0.947381	0.343444	0.999901
LRRC57	125.67	-0.0615381	0.0649584	0.947347	0.343462	0.999901
HIP1R	121.872	-0.0620667	0.0655311	0.947134	0.343571	0.999901
LOC101926940	3.91137	0.0215612	0.0227652	-0.947112	0.343582	0.999901
SNORD45C	4.93551	0.0191357	0.0202043	-0.947111	0.343582	0.999901
PGP	145.987	-0.0634541	0.0670127	0.946898	0.343691	0.999901
ICE2	318.391	-0.0631683	0.0667335	0.946576	0.343855	0.999901
LINC01452	0.780229	-0.00777927	0.00822016	0.946364	0.343963	0.999901
WDR47	342.871	0.0618986	0.0654295	-0.946036	0.34413	0.999901
LTA4H	728.15	-0.063086	0.0666877	0.94599	0.344153	0.999901
GPR143	0.396152	0.00557724	0.00589675	-0.945816	0.344243	0.999901
MIR499A	0.396152	0.00557724	0.00589675	-0.945816	0.344243	0.999901
MIR6847	0.396152	0.00557724	0.00589675	-0.945816	0.344243	0.999901
TEX41	8.22067	-0.0244963	0.025902	0.945731	0.344286	0.999901
TRMT2B	115.281	-0.0591658	0.0625667	0.945644	0.34433	0.999901
TSPAN4	1339.45	0.0620985	0.0656995	-0.945189	0.344562	0.999901
PAQR6	30.3403	0.0410568	0.0434569	-0.944771	0.344776	0.999901
SNORD114-23	0.393895	0.00556344	0.00588946	-0.944643	0.344841	0.999901
UNC5A	0.393895	0.00556344	0.00588946	-0.944643	0.344841	0.999901
ACACB	158.537	0.0613516	0.0650098	-0.943729	0.345308	0.999901
LOC100505715	52.668	-0.0473778	0.0502043	0.943701	0.345323	0.999901
DMD	55.1629	-0.0341444	0.0361819	0.943687	0.34533	0.999901
LINC01481	16.0761	-0.0386785	0.0410005	0.943366	0.345494	0.999901
LINC01301	7.29797	-0.0290487	0.030794	0.943325	0.345515	0.999901
CCR6	0.391377	0.00554793	0.00588126	-0.943323	0.345516	0.999901
SCARNA5	0.391377	0.00554793	0.00588126	-0.943323	0.345516	0.999901
SLC39A5	8.41202	0.0241009	0.0255504	-0.943269	0.345543	0.999901
ID3	556.885	-0.0624038	0.0661691	0.943095	0.345632	0.999901
SRRM5	236.755	0.0622453	0.0660022	-0.943078	0.345641	0.999901
AQP8	0.408874	-0.00557862	0.00591596	0.942977	0.345692	0.999901
PGD	1973.01	-0.060304	0.0639515	0.942965	0.345699	0.999901
NAGPA-AS1	22.0809	0.0447266	0.047436	-0.942882	0.345741	0.999901
LYZ	0.644511	0.00865967	0.00918554	-0.94275	0.345809	0.999901
SLC4A9	0.644511	0.00865967	0.00918554	-0.94275	0.345809	0.999901
GDPGP1	9.24093	0.0320265	0.0339733	-0.942695	0.345837	0.999901
ANKS3	227.324	0.0633553	0.0672794	-0.941675	0.346359	0.999901
DNAJC9	153.56	-0.0624218	0.0662955	0.941569	0.346414	0.999901
MIR7111	0.992592	0.01102	0.0117055	-0.941445	0.346477	0.999901
RUVBL1-AS1	0.641993	0.00864484	0.00918353	-0.941342	0.34653	0.999901
KIAA0513	380.33	-0.0628516	0.0668058	0.940809	0.346803	0.999901
PKP1	0.911601	0.00742782	0.00789567	-0.940746	0.346835	0.999901
IFIT3	183.436	-0.050534	0.0537226	0.940648	0.346885	0.999901
APOC1	12.2062	-0.0196781	0.02092	0.940633	0.346893	0.999901
ULK1	1074.06	0.0562484	0.0598064	-0.940509	0.346957	0.999901
IGF2BP2-AS1	2.2224	-0.0174839	0.0185916	0.94042	0.347002	0.999901
CALCRL	51.0687	0.0494545	0.0525953	-0.940284	0.347072	0.999901
ST6GALNAC5	1.22635	0.00970201	0.0103201	-0.940112	0.34716	0.999901
AFG3L2	652.45	-0.060618	0.0645132	0.939622	0.347411	0.999901
FAM131A	116.395	0.0591329	0.0629399	-0.939514	0.347467	0.999901
LINC01473	2.23802	0.0166714	0.0177449	-0.939505	0.347472	0.999901
KRBOX1-AS1	3.14408	-0.0203754	0.0216897	0.939404	0.347523	0.999901
GTPBP8	87.7474	-0.0617437	0.0657374	0.939247	0.347604	0.999901
CTTNBP2NL	556.333	-0.0558027	0.0594191	0.939137	0.34766	0.999901
TMEM102	26.82	0.0478614	0.0509654	-0.939096	0.347681	0.999901
ENHO	1.5833	-0.0147263	0.0156883	0.93868	0.347895	0.999901
MORN4	143.002	-0.0630043	0.0671266	0.93859	0.347941	0.999901
CDK2AP2	323.657	0.0620699	0.0661555	-0.938241	0.34812	0.999901
ITGA4	447.764	-0.052929	0.05642	0.938124	0.348181	0.999901
DGUOK	244.336	-0.063038	0.0672232	0.937742	0.348377	0.999901
PIGS	649.861	0.0596562	0.0636309	-0.937536	0.348483	0.999901
CERS6	577.739	-0.0628527	0.0670487	0.937418	0.348543	0.999901
DCXR	159.452	0.0630019	0.0672278	-0.93714	0.348686	0.999901
CXXC4	0.379944	0.0054751	0.00584258	-0.937104	0.348705	0.999901
H1FNT	0.379944	0.0054751	0.00584258	-0.937104	0.348705	0.999901
HIST2H2AB	0.379944	0.0054751	0.00584258	-0.937104	0.348705	0.999901
STAC3	15.4454	0.0379513	0.0405225	-0.936547	0.348992	0.999901
NDOR1	296.269	0.0621792	0.0664076	-0.936326	0.349105	0.999901
CPSF4L	25.7951	0.0476631	0.050905	-0.936315	0.349111	0.999901
SEC14L2	174.485	-0.0583189	0.0622913	0.936228	0.349156	0.999901
DCP1B	157.639	-0.0629718	0.0672785	0.935987	0.34928	0.999901
CPNE5	1.00031	0.0106301	0.0113571	-0.935984	0.349281	0.999901
SLC15A3	153.06	-0.0623008	0.0665716	0.935847	0.349352	0.999901
ITCH	665.182	-0.057214	0.0611482	0.935661	0.349448	0.999901
HOXC13	3.29612	0.0141288	0.0151024	-0.935536	0.349512	0.999901
OR2A9P	2.73691	-0.016082	0.0171925	0.935412	0.349576	0.999901
NRCAM	31.7233	0.0371779	0.0397474	-0.935354	0.349606	0.999901
IL17RE	22.3763	-0.0446513	0.0477545	0.935017	0.349779	0.999901
DGKZ	278.498	0.0620131	0.066365	-0.934424	0.350085	0.999901
NFATC2IP	308.217	-0.0614164	0.0657316	0.934351	0.350123	0.999901
SPATA6L	8.26824	0.0303842	0.0325206	-0.934308	0.350145	0.999901
HCN4	0.374907	0.00544234	0.0058251	-0.934291	0.350154	0.999901
LOC101928622	0.374907	0.00544234	0.0058251	-0.934291	0.350154	0.999901
LOC101928696	0.374907	0.00544234	0.0058251	-0.934291	0.350154	0.999901
LOC102577426	0.374907	0.00544234	0.0058251	-0.934291	0.350154	0.999901
MIR3183	0.374907	0.00544234	0.0058251	-0.934291	0.350154	0.999901
MIR4728	0.374907	0.00544234	0.0058251	-0.934291	0.350154	0.999901
SDR9C7	0.374907	0.00544234	0.0058251	-0.934291	0.350154	0.999901
SMIM21	0.374907	0.00544234	0.0058251	-0.934291	0.350154	0.999901
FZD9	4.25758	0.0189773	0.0203146	-0.934172	0.350215	0.999901
DENND6A	274.76	-0.060341	0.0645957	0.934133	0.350235	0.999901
MIR3133	0.390134	-0.00546765	0.00585719	0.933495	0.350565	0.999901
POU3F3	0.390134	-0.00546765	0.00585719	0.933495	0.350565	0.999901
NDUFC2	87.6188	-0.0604053	0.064712	0.933448	0.350589	0.999901
RABL3	237.07	0.0625473	0.0670115	-0.933382	0.350623	0.999901
PCMT1	597.911	-0.0585738	0.0627649	0.933225	0.350704	0.999901
AQP9	3.09233	-0.0133481	0.014306	0.933041	0.350799	0.999901
DLG5-AS1	16.3953	0.0390584	0.0418645	-0.932972	0.350834	0.999901
KRTCAP3	33.8953	0.0484372	0.0519377	-0.932601	0.351026	0.999901
NTN5	11.9334	0.0297056	0.0318566	-0.932478	0.351089	0.999901
SERPIND1	2.16703	0.0157863	0.0169296	-0.932467	0.351095	0.999901
MAPKAPK5	270.747	-0.0625468	0.067077	0.932463	0.351097	0.999901
PSMB4	1229.17	-0.0460681	0.049419	0.932194	0.351237	0.999901
ASPHD2	112.522	-0.0604252	0.0648263	0.932109	0.35128	0.999901
[truncated: 24,218 more rows]

## Sheet: Supplementary Table 6b
Supplementary Table 6 - RNA sequencing of MSC responses to breast cancer secretomes
MDA-WT vs SFM
Gene Identifiers	mean normalised counts, averaged over all samples from both conditions	log2(MDA-WT/SFM)	standard error (log2(MDA-WT/SFM)	Wald statistic	p value	p value (adjusted for multiple testing with the Benjamini-Hochberg procedure)
SLC39A14	3782.51	1.89183	0.0955809	-19.7929	3.43e-87	4.5e-83
MMP3	665.966	4.09952	0.237442	-17.2653	8.58e-67	5.63e-63
SLC16A3	2321.71	1.14029	0.0739279	-15.4243	1.12e-53	4.92e-50
PGK1	3004.68	0.794531	0.0633156	-12.5487	4.04e-36	1.33e-32
CXCL5	104.245	3.03392	0.24611	-12.3275	6.44e-35	1.69e-31
MMP8	272.356	2.93986	0.250228	-11.7487	7.17e-32	1.57e-28
NFKBIZ	2402.81	1.72833	0.161005	-10.7347	7e-27	1.31e-23
GCH1	117.582	2.02959	0.203015	-9.99723	1.57e-23	2.56e-20
SOD2	9397	2.10373	0.210667	-9.98602	1.75e-23	2.56e-20
PLOD2	4618.59	0.833376	0.0854557	-9.75214	1.81e-22	2.37e-19
MOXD1	996.913	1.74362	0.181112	-9.6273	6.13e-22	7.32e-19
CXCL8	2411.59	2.36392	0.250364	-9.44191	3.66e-21	4.01e-18
CHI3L2	747.709	2.17733	0.243428	-8.94446	3.74e-19	3.78e-16
RELB	436.123	1.12104	0.126453	-8.86523	7.63e-19	7.16e-16
C3	3445.99	2.18397	0.250538	-8.7171	2.85e-18	2.5e-15
MMP13	12288.7	2.0488	0.244681	-8.37336	5.6e-17	4.6e-14
NAMPT	2025.17	1.79854	0.216619	-8.30279	1.02e-16	7.86e-14
ICAM1	613.039	1.7854	0.219264	-8.1427	3.87e-16	2.82e-13
TPI1	3073.31	0.740941	0.0927136	-7.99172	1.33e-15	9.2e-13
CCL2	1481.23	1.64397	0.206179	-7.97352	1.54e-15	1.01e-12
SLC39A8	321.336	1.77974	0.225056	-7.90801	2.62e-15	1.64e-12
PNRC1	911.654	0.815534	0.103897	-7.84946	4.18e-15	2.49e-12
TNIP1	1080.78	0.864154	0.110368	-7.82977	4.89e-15	2.79e-12
CXCL2	572.97	1.75256	0.236676	-7.40488	1.31e-13	7.11e-11
FTH1P3	197.374	1.15889	0.156588	-7.40086	1.35e-13	7.11e-11
CD82	1766.09	0.809156	0.110368	-7.33143	2.28e-13	1.15e-10
WTAP	1750.49	1.20822	0.165634	-7.29451	3e-13	1.46e-10
C1R	12366.4	0.963844	0.132605	-7.26853	3.63e-13	1.65e-10
TRIM8	2034.37	0.570511	0.0784448	-7.27277	3.52e-13	1.65e-10
TRPA1	167.2	1.41934	0.201144	-7.05634	1.71e-12	7.48e-10
HS3ST3B1	258.063	0.940861	0.133433	-7.05117	1.77e-12	7.52e-10
CXCL3	259.872	1.71206	0.243893	-7.01971	2.22e-12	9.12e-10
NTN1	1373.86	1.49705	0.213943	-6.99741	2.61e-12	1.04e-09
BMF	200.28	-1.22558	0.176151	6.95754	3.46e-12	1.33e-09
IRAK3	123.857	1.27682	0.183592	-6.95467	3.53e-12	1.33e-09
P4HA1	2405.32	0.895571	0.128924	-6.94648	3.75e-12	1.37e-09
NFKB2	840.257	0.878331	0.129548	-6.77994	1.2e-11	4.27e-09
EHF	16.842	1.67114	0.249609	-6.69504	2.16e-11	7.45e-09
SLC43A2	379.036	1.371	0.205606	-6.66809	2.59e-11	8.73e-09
FTH1	110675	0.839759	0.126816	-6.62188	3.55e-11	1.16e-08
SUSD6	927.509	0.77773	0.117787	-6.60285	4.03e-11	1.29e-08
SBNO2	1876.01	0.485064	0.0744571	-6.51468	7.28e-11	2.28e-08
MT1E	132.76	1.36168	0.210866	-6.45758	1.06e-10	3.25e-08
TFRC	1975.66	0.745846	0.116096	-6.42436	1.32e-10	3.95e-08
RARRES2	467.24	1.51468	0.236493	-6.40475	1.51e-10	4.4e-08
LOC101929319	264.998	1.58901	0.250248	-6.34975	2.16e-10	6.16e-08
BNIP3	617.191	0.633982	0.0999843	-6.34082	2.29e-10	6.39e-08
GSAP	143.689	0.813852	0.129144	-6.3019	2.94e-10	8.04e-08
TYMP	258.975	1.09554	0.175114	-6.25616	3.95e-10	1.06e-07
INHBA	955.698	0.861067	0.137858	-6.24606	4.21e-10	1.11e-07
JAK2	1355.53	1.0661	0.171095	-6.23104	4.63e-10	1.19e-07
PID1	223.995	1.24885	0.201106	-6.20991	5.3e-10	1.34e-07
MMP9	15.5055	1.54824	0.250699	-6.1757	6.59e-10	1.63e-07
TP53INP1	661.973	-0.644489	0.105375	6.11616	9.59e-10	2.33e-07
GYS1	571.904	0.692928	0.113842	-6.08673	1.15e-09	2.75e-07
CXCL1	998.998	1.45854	0.240083	-6.07516	1.24e-09	2.9e-07
TRIL	22.1091	-1.49087	0.245515	6.07242	1.26e-09	2.9e-07
NFKBIA	1631.65	0.968186	0.160563	-6.02995	1.64e-09	3.71e-07
ABCC3	898.314	0.850621	0.143197	-5.94023	2.85e-09	6.26e-07
ID2	726.895	0.98192	0.165319	-5.93954	2.86e-09	6.26e-07
FAM132B	36.13	1.34381	0.227301	-5.91203	3.38e-09	7.27e-07
RAP2B	810.682	-0.530339	0.0901625	5.88203	4.05e-09	8.58e-07
ANKRD44	194.366	-0.786796	0.134374	5.85525	4.76e-09	9.93e-07
GAPDH	20678.5	0.549747	0.0940347	-5.84621	5.03e-09	1.03e-06
C1RL	1251.13	0.723658	0.125447	-5.76863	7.99e-09	1.61e-06
SEMA4B	445.953	0.785151	0.13697	-5.73227	9.91e-09	1.97e-06
ADAMTS5	1032.11	1.13905	0.199971	-5.69608	1.23e-08	2.4e-06
PRDM16	220.021	-0.971817	0.171652	5.66154	1.5e-08	2.9e-06
MIR210HG	57.6044	1.23826	0.219824	-5.63298	1.77e-08	3.37e-06
ENPP2	3764.12	1.22461	0.21897	-5.59258	2.24e-08	4.2e-06
AGTRAP	305.426	0.736058	0.131683	-5.58962	2.28e-08	4.21e-06
CH25H	357.065	1.07618	0.192723	-5.58409	2.35e-08	4.24e-06
KIAA0368	1428.79	0.311064	0.0557105	-5.58358	2.36e-08	4.24e-06
G0S2	268.961	1.37974	0.247626	-5.57185	2.52e-08	4.47e-06
KIFC3	393.615	0.617303	0.111136	-5.55446	2.78e-08	4.88e-06
RGAG4	341.412	-0.906097	0.163419	5.54464	2.95e-08	5.09e-06
RIPK2	237.914	0.574819	0.104191	-5.51699	3.45e-08	5.88e-06
ALDOA	9767.14	0.642709	0.116602	-5.51199	3.55e-08	5.97e-06
GLIS3	1159.33	0.891166	0.161891	-5.50473	3.7e-08	6.15e-06
BID	217.191	0.759663	0.138899	-5.46918	4.52e-08	7.42e-06
TRAF3	531.325	0.452444	0.0831251	-5.44292	5.24e-08	8.5e-06
IRF1	512.701	0.794328	0.146121	-5.4361	5.45e-08	8.72e-06
ODF3B	68.1969	1.12753	0.2086	-5.40524	6.47e-08	1.02e-05
EPHA3	256.235	-1.07475	0.199071	5.39883	6.71e-08	1.05e-05
CHSY1	1318.19	-0.49203	0.0912382	5.39281	6.94e-08	1.06e-05
COMP	424.86	-1.32893	0.246383	5.39375	6.9e-08	1.06e-05
TMEM132A	1004.16	1.09104	0.20327	-5.36747	7.98e-08	1.21e-05
AOX1	301.902	1.31854	0.24581	-5.36406	8.14e-08	1.21e-05
GALNT2	2834.16	0.519496	0.0968671	-5.36297	8.19e-08	1.21e-05
BIRC3	220.027	1.2731	0.238393	-5.34033	9.28e-08	1.35e-05
CCL7	52.3402	1.29749	0.243278	-5.33335	9.64e-08	1.39e-05
C1S	12151.5	0.720145	0.135994	-5.29544	1.19e-07	1.69e-05
DYNC2H1	1172.03	0.590447	0.11169	-5.28646	1.25e-07	1.76e-05
COL7A1	1518.66	0.804562	0.152547	-5.27419	1.33e-07	1.86e-05
RCL1	257.368	0.898561	0.170764	-5.26202	1.42e-07	1.97e-05
ID1	305.336	-1.16868	0.222841	5.24447	1.57e-07	2.14e-05
DRAM1	939.179	0.920231	0.176127	-5.22482	1.74e-07	2.36e-05
FNDC3B	2957.7	0.483696	0.0927999	-5.21225	1.87e-07	2.5e-05
LDHA	6415.45	0.466371	0.0896212	-5.20381	1.95e-07	2.59e-05
PDK1	198.157	0.62659	0.120601	-5.19556	2.04e-07	2.68e-05
C1QTNF1	885.912	1.1366	0.219596	-5.17584	2.27e-07	2.94e-05
TPCN1	1089.46	0.454597	0.0878527	-5.17453	2.28e-07	2.94e-05
FNDC1	3782.32	1.19826	0.232042	-5.16401	2.42e-07	3.08e-05
STAT4	52.7957	1.16056	0.226515	-5.12354	3e-07	3.79e-05
TNFRSF11B	707.913	1.02656	0.200479	-5.12052	3.05e-07	3.81e-05
ZMAT3	3190.31	-0.380253	0.0743406	5.115	3.14e-07	3.89e-05
CKB	48.9043	-1.15024	0.226939	5.0685	4.01e-07	4.83e-05
GSN-AS1	479.556	-0.72506	0.143039	5.06895	4e-07	4.83e-05
VASN	3291.26	0.546485	0.107815	-5.0687	4.01e-07	4.83e-05
TNFAIP8	303.745	0.736472	0.145501	-5.06163	4.16e-07	4.96e-05
STEAP1	992.777	0.907767	0.17971	-5.05128	4.39e-07	5.19e-05
ANGPT1	2193.86	0.922614	0.183551	-5.02648	5e-07	5.86e-05
VEGFA	7668.6	0.753483	0.150398	-5.00992	5.45e-07	6.33e-05
ZNF436	308.808	-0.537656	0.107361	5.00792	5.5e-07	6.34e-05
ATOH8	75.3584	-0.985474	0.198318	4.96916	6.72e-07	7.68e-05
ACO1	1309.88	0.876877	0.176694	-4.96268	6.95e-07	7.8e-05
CHST11	587.603	1.07041	0.21567	-4.9632	6.93e-07	7.8e-05
BEST1	271.111	0.759496	0.153672	-4.94231	7.72e-07	8.59e-05
MIF-AS1	2253.46	0.636543	0.129507	-4.91511	8.87e-07	9.79e-05
NNMT	3815.6	0.696905	0.142535	-4.88935	1.01e-06	0.000110713
SAMHD1	398.244	-0.496196	0.101576	4.88498	1.03e-06	0.000112262
IL11	267.555	1.11838	0.229229	-4.8789	1.07e-06	0.00011483
SLC30A1	538.6	0.63765	0.130908	-4.87098	1.11e-06	0.00011856
ALDOC	280.727	0.729152	0.149963	-4.86221	1.16e-06	0.000122767
IKBKE	144.758	0.880473	0.181134	-4.86089	1.17e-06	0.000122767
ALDH1A3	611.149	-0.837426	0.172835	4.84523	1.26e-06	0.000131805
SLC44A1	1889.54	-0.37806	0.0780792	4.84201	1.29e-06	0.000132902
ACSL1	524.714	0.701383	0.14494	-4.83912	1.3e-06	0.000133798
MID1	732.257	0.591061	0.122644	-4.8193	1.44e-06	0.000146632
QSOX1	5253.38	0.845188	0.175431	-4.81779	1.45e-06	0.000146632
ALDH7A1	722.57	-0.498441	0.103584	4.81195	1.49e-06	0.000149829
SMAD6	342.609	-0.73653	0.153679	4.79264	1.65e-06	0.00016375
IQSEC2	380.978	0.533137	0.111582	-4.778	1.77e-06	0.000174808
TNFAIP2	897.666	1.09594	0.229637	-4.7725	1.82e-06	0.000178317
ARHGAP24	511.029	-0.683174	0.143298	4.76752	1.87e-06	0.000180092
MFSD2A	155.002	1.15753	0.242747	-4.76846	1.86e-06	0.000180092
NEDD4	728.517	0.725454	0.152349	-4.76179	1.92e-06	0.000183924
C1RL-AS1	302.015	0.659343	0.139436	-4.72864	2.26e-06	0.000215083
NDRG1	3356.34	0.923781	0.195464	-4.72609	2.29e-06	0.000216242
FGF11	36.8274	1.12824	0.239244	-4.71585	2.41e-06	0.000225778
STEAP2	1339.37	1.01976	0.216491	-4.7104	2.47e-06	0.000230256
WNT5A	3579.27	0.584186	0.124268	-4.70102	2.59e-06	0.000239395
MT1X	87.5383	1.12404	0.240248	-4.67868	2.89e-06	0.000265145
ENO1	8479.86	0.520002	0.111192	-4.67663	2.92e-06	0.000265947
SNX9	2553.18	-0.503564	0.107974	4.66376	3.1e-06	0.000281184
LOC100132891	526.33	0.767338	0.164833	-4.65524	3.24e-06	0.000291067
MIF	2305.53	0.627928	0.135301	-4.64096	3.47e-06	0.000309806
NFKB1	474.946	0.441753	0.0952271	-4.63894	3.5e-06	0.000310733
GLIS3-AS1	53.8031	0.920267	0.198862	-4.62768	3.7e-06	0.000325909
GAB1	294.843	-0.563052	0.122176	4.60853	4.06e-06	0.000355021
HSP90B2P	112.938	0.876258	0.190212	-4.60675	4.09e-06	0.00035571
SLC16A7	595.397	0.834633	0.182085	-4.58375	4.57e-06	0.000394568
CA9	32.0999	1.10565	0.241457	-4.57908	4.67e-06	0.000398254
COL3A1	115887	0.96528	0.210796	-4.57922	4.67e-06	0.000398254
DENND5A	1425.2	0.313541	0.0686633	-4.56636	4.96e-06	0.000420451
RTN4RL2	78.7541	1.06995	0.234792	-4.557	5.19e-06	0.000436794
PIM1	682.229	0.533872	0.117529	-4.54248	5.56e-06	0.000465029
ERI1	178.162	-0.586672	0.129214	4.54031	5.62e-06	0.000466862
ID3	415.369	-0.903652	0.199724	4.5245	6.05e-06	0.000499988
IL6ST	6383.65	0.54431	0.121112	-4.49426	6.98e-06	0.000569426
RGS2	1111.16	-0.748163	0.166442	4.49504	6.96e-06	0.000569426
GPR84	16.8406	1.12428	0.250438	-4.48925	7.15e-06	0.000579394
ANKH	6324.29	-0.770889	0.171867	4.48538	7.28e-06	0.000586389
IL4R	732.573	0.4468	0.0997298	-4.48011	7.46e-06	0.000597395
TNFAIP3	1303.83	1.07958	0.241466	-4.47096	7.79e-06	0.000619745
FZD4	505.494	-0.769776	0.172269	4.46845	7.88e-06	0.000623286
IL6	1071.44	1.03146	0.231207	-4.4612	8.15e-06	0.000640879
TNFSF10	110.321	1.10564	0.248529	-4.44874	8.64e-06	0.000675163
CEBPD	979.131	0.59644	0.134129	-4.44675	8.72e-06	0.000677413
DCBLD1	244.558	0.522651	0.117865	-4.43431	9.24e-06	0.000713502
PDK4	50.0865	-0.817322	0.184601	4.4275	9.53e-06	0.000723622
PDZRN3	1127.21	0.65491	0.147872	-4.42891	9.47e-06	0.000723622
WTAPP1	478.187	0.982545	0.221886	-4.42814	9.5e-06	0.000723622
KAZALD1	158.976	-0.757135	0.171342	4.41885	9.92e-06	0.00074888
APLN	34.6958	1.0633	0.240811	-4.41552	1.01e-05	0.000756173
TNFAIP6	2246.62	1.04559	0.237301	-4.40617	1.05e-05	0.00078505
FCHSD2	848.974	0.323878	0.0735693	-4.40235	1.07e-05	0.000794467
POM121L9P	246.202	0.84578	0.192395	-4.39607	1.1e-05	0.000813218
PLD1	335.692	1.05353	0.239991	-4.38985	1.13e-05	0.000832135
SCN1A	37.4274	1.0785	0.245966	-4.38475	1.16e-05	0.000842472
TRAF3IP2	415.771	0.901986	0.205659	-4.38583	1.16e-05	0.000842472
ZC3H12A	713.775	0.95591	0.218726	-4.37035	1.24e-05	0.000895061
SPRY4	925.716	-0.596082	0.136873	4.35499	1.33e-05	0.00095492
CNTNAP1	957.38	0.592962	0.136725	-4.3369	1.45e-05	0.00103133
BDKRB2	896.965	0.727319	0.168269	-4.32237	1.54e-05	0.00109574
ITGB5	11238	-0.482263	0.112006	4.30569	1.66e-05	0.00117528
ENTPD7	337.066	0.476918	0.111344	-4.2833	1.84e-05	0.00129315
FYN	1501.02	0.573582	0.134721	-4.25755	2.07e-05	0.00144369
FILIP1	29.3264	1.04722	0.246293	-4.25192	2.12e-05	0.00145812
LAMB3	167.708	0.896753	0.210912	-4.25178	2.12e-05	0.00145812
LINC00982	55.3878	-1.02116	0.240071	4.25358	2.1e-05	0.00145812
PLEKHF2	95.8301	-0.626434	0.149332	4.19491	2.73e-05	0.00186711
NPTX1	28.0318	-0.96951	0.231711	4.18414	2.86e-05	0.00194768
EDARADD	147.825	0.667077	0.15955	-4.181	2.9e-05	0.00196456
GSN	5705.21	-0.657996	0.157654	4.17367	3e-05	0.00201853
RNF144B	69.0404	1.01327	0.243347	-4.16388	3.13e-05	0.00209632
IER5L	876.302	-0.644617	0.155168	4.15431	3.26e-05	0.00217493
FXYD1	31.8635	-0.974342	0.234818	4.14935	3.33e-05	0.00221131
IGDCC4	364.037	0.692481	0.167077	-4.14468	3.4e-05	0.00223847
PLOD1	4335.88	0.696301	0.168108	-4.14198	3.44e-05	0.00223847
RILP	137.032	0.566767	0.136803	-4.14295	3.43e-05	0.00223847
TRAF2	115.807	0.593965	0.143364	-4.14305	3.43e-05	0.00223847
FILIP1L	390.896	0.620709	0.150197	-4.13263	3.59e-05	0.00231996
HSP90B1	12773.7	0.634466	0.154858	-4.0971	4.18e-05	0.00269312
LOC100130744	829.677	-0.706131	0.172735	4.08795	4.35e-05	0.00278784
PPM1K	133.455	-0.568043	0.139417	4.0744	4.61e-05	0.00294086
2003-03-01	51.3656	0.985879	0.242442	-4.06646	4.77e-05	0.00302817
SPRY1	505.199	-0.829522	0.205084	4.04479	5.24e-05	0.0033063
MMP11	373.207	-0.949013	0.234713	4.04329	5.27e-05	0.00331163
WWC1	92.821	1.01175	0.250564	-4.03788	5.39e-05	0.00337287
GGT7	598.717	0.414676	0.102733	-4.03645	5.43e-05	0.00337734
CASP4	325.077	0.430363	0.107484	-4.00398	6.23e-05	0.00385817
ADAM10	2311.46	-0.470006	0.117886	3.98694	6.69e-05	0.00412647
GPI	2464.57	0.524398	0.131648	-3.98332	6.8e-05	0.00417024
UCN2	17.6506	0.957458	0.240937	-3.97389	7.07e-05	0.00431883
PSMB10	248.705	0.483773	0.121956	-3.96679	7.28e-05	0.0044289
SLC14A1	3934.01	-0.966618	0.244107	3.95981	7.5e-05	0.00453931
TMEM165	1359.87	0.425525	0.107618	-3.95402	7.68e-05	0.0046292
CYTH3	837.097	-0.683161	0.172975	3.94949	7.83e-05	0.00469624
DUSP8	69.9994	0.917551	0.232572	-3.94524	7.97e-05	0.0047586
GCHFR	39.6314	0.836992	0.212329	-3.94195	8.08e-05	0.00476022
KLHL41	16.7583	-0.981688	0.249039	3.94191	8.08e-05	0.00476022
OSBPL3	415.39	-0.674065	0.170945	3.94316	8.04e-05	0.00476022
RGS4	803.893	-0.929542	0.237176	3.9192	8.88e-05	0.00520835
SAMD11	231.957	-0.74914	0.191296	3.91612	9e-05	0.00525195
PHC2	2060.23	0.517783	0.132283	-3.91419	9.07e-05	0.00527065
MAP1LC3A	408.431	0.374167	0.0957284	-3.90863	9.28e-05	0.0053698
PNKD	326.065	0.751938	0.192445	-3.9073	9.33e-05	0.00537575
IGF1	90.1301	0.964167	0.247031	-3.90302	9.5e-05	0.00544777
NFKBIE	191.018	0.693623	0.178169	-3.89305	9.9e-05	0.005652
NQO1	2318.91	-0.460931	0.118448	3.89142	9.97e-05	0.00566542
EFNB2	225.017	0.955278	0.246793	-3.87076	0.000108495	0.00614116
LIF	4277.1	0.955197	0.24754	-3.85876	0.000113964	0.00642307
FRMPD4	92.2779	0.903048	0.234525	-3.85054	0.00011786	0.0065915
PANX1	482.095	0.467308	0.121368	-3.85034	0.000117956	0.0065915
C16orf45	933.426	-0.416718	0.10918	3.8168	0.000135193	0.0075227
HAS2-AS1	92.4293	0.836252	0.220006	-3.80105	0.000144086	0.00798368
CCDC71L	509.717	0.58186	0.153704	-3.78558	0.00015335	0.00846133
MMP1	1779.31	0.78655	0.208388	-3.77444	0.000160365	0.00881137
FSTL1	14363.2	0.630283	0.167212	-3.76937	0.000163657	0.00895477
MESDC2	1049.07	0.569419	0.151275	-3.76414	0.000167123	0.00910647
BCL3	648.421	0.595161	0.158247	-3.76095	0.000169269	0.00918529
ZCCHC2	261.771	0.669441	0.178686	-3.74647	0.000179341	0.00969181
NTN4	319.112	-0.464396	0.124143	3.74082	0.000183422	0.00987171
BDKRB1	189.808	0.857435	0.229952	-3.72876	0.000192421	0.0103138
SNCAIP	155.633	0.892427	0.240047	-3.71772	0.000201031	0.0107315
CYLD	742.254	0.292954	0.0789481	-3.71071	0.000206678	0.0109439
PKIB	17.6151	0.93003	0.250569	-3.71167	0.0002059	0.0109439
PTX3	3129.67	0.910605	0.245868	-3.70364	0.000212527	0.0112084
CXCL6	1796.41	0.760543	0.205597	-3.6992	0.00021628	0.0113514
SESN3	760.718	-0.856723	0.231647	3.6984	0.000216966	0.0113514
DMXL2	486.84	0.540621	0.146331	-3.69452	0.000220304	0.0114803
LAP3	652.666	0.337115	0.0913444	-3.69059	0.000223734	0.0116129
FAM63B	575.323	-0.581302	0.157644	3.68743	0.000226531	0.0117118
ENC1	559.18	0.862841	0.234492	-3.67961	0.00023359	0.0118749
NFE2L3	61.9748	0.813406	0.220884	-3.6825	0.000230957	0.0118749
PLXDC2	1483.72	-0.865402	0.235184	3.67968	0.000233529	0.0118749
SLC43A3	772.594	0.826314	0.224607	-3.67894	0.000234207	0.0118749
WISP1	632.372	0.738575	0.200721	-3.67961	0.000233588	0.0118749
CA12	5771.65	0.858078	0.233627	-3.67285	0.000239863	0.0121149
INPP4B	125.052	-0.691874	0.18851	3.67023	0.000242335	0.0121929
PDXK	1181.48	0.356051	0.0970521	-3.66866	0.000243825	0.012221
ZFP90	353.848	-0.368006	0.100345	3.66743	0.000245005	0.0122335
IL4I1	57.3196	0.917473	0.250739	-3.65908	0.000253123	0.012591
C1QL1	19.245	0.900874	0.24652	-3.65437	0.000257816	0.012776
SLC25A37	395.937	0.586943	0.16072	-3.65197	0.000260237	0.0128475
IGFBP3	5182.48	-0.824096	0.226052	3.64561	0.000266763	0.0131203
NPAS2	188.796	0.622287	0.170839	-3.64253	0.000269975	0.0132288
SLC26A6	200.525	0.550401	0.151431	-3.63466	0.000278346	0.0135883
SEL1L3	1265.73	0.894613	0.246649	-3.62706	0.000286662	0.0139424
NCOR2	2885.89	0.470234	0.129683	-3.62603	0.000287816	0.0139469
SPAG4	57.7579	0.787291	0.217506	-3.61963	0.000295026	0.0142437
ABCC4	427.771	0.40265	0.111334	-3.61658	0.000298523	0.0143396
CEBPB	2508.05	0.643188	0.177933	-3.61478	0.000300603	0.0143396
GALM	193.987	-0.468364	0.129593	3.61411	0.000301381	0.0143396
RPL23P8	130.779	0.469585	0.129927	-3.61422	0.000301251	0.0143396
IL17RA	459.924	0.727999	0.202082	-3.60249	0.000315189	0.0149425
BBOX1	15.5777	0.864138	0.240126	-3.59869	0.000319828	0.0150857
WDR26	1926.44	-0.337472	0.0937908	3.59813	0.000320507	0.0150857
LGALS3	2663.17	-0.2533	0.0705221	3.59179	0.000328415	0.0153805
NCSTN	1772.66	0.47877	0.133316	-3.59124	0.000329113	0.0153805
TOB1	654.41	-0.29346	0.0818483	3.58542	0.000336537	0.0156717
ADAMTS2	1606.21	-0.455342	0.127213	3.57936	0.000344437	0.0157872
GBP2	617.012	0.382576	0.106897	-3.57891	0.00034503	0.0157872
LOXL3	928.382	0.53104	0.148379	-3.57896	0.000344969	0.0157872
SLC2A6	199.508	0.770361	0.215144	-3.58067	0.000342715	0.0157872
SLC36A1	232.303	-0.384352	0.107331	3.581	0.000342285	0.0157872
SOCS5	1332.65	-0.577579	0.161626	3.57355	0.000352174	0.0160581
RIN2	1127.43	-0.634046	0.177559	3.57091	0.000355746	0.0161649
PPP2R5A	408.84	-0.423303	0.118617	3.56867	0.000358801	0.0162475
EPS8	1516.06	-0.316809	0.0888353	3.56626	0.000362118	0.0163413
ADCY4	95.2132	0.754059	0.211574	-3.56404	0.000365185	0.0164233
PDK3	240.96	0.779226	0.218829	-3.56088	0.000369611	0.0165656
DNAJC3	1472.71	0.346771	0.097415	-3.55973	0.000371232	0.0165817
SLC52A2	588.274	0.260764	0.0733788	-3.55367	0.000379902	0.0169114
NDUFA4L2	156.473	0.885851	0.24937	-3.55236	0.000381791	0.0169381
RASD1	1550.18	0.797704	0.224827	-3.54808	0.000388053	0.017158
USB1	298.663	0.446234	0.1259	-3.54435	0.000393585	0.0173442
SLC11A2	815.681	0.450675	0.12726	-3.54138	0.000398039	0.0174818
MSC	454.312	0.853218	0.241084	-3.5391	0.0004015	0.017575
DENND4C	624.622	-0.2903	0.0823963	3.52322	0.000426338	0.0185295
FAM84A	148.775	-0.813703	0.230943	3.52339	0.000426064	0.0185295
SELM	1217.05	0.368811	0.104702	-3.52247	0.000427538	0.0185295
ERO1L	724.024	0.384611	0.109227	-3.5212	0.0004296	0.0185576
AHRR	828.951	-0.648432	0.184428	3.5159	0.000438269	0.0188267
PLAUR	1131.44	0.403247	0.114701	-3.51564	0.000438696	0.0188267
PPFIA2	121.903	-0.765317	0.217794	3.51394	0.000441505	0.0188855
UXS1	543.155	0.431703	0.123068	-3.50786	0.000451731	0.0192602
DOCK10	582.025	-0.578818	0.165215	3.50341	0.000459335	0.019521
PTPN2	257.589	0.660393	0.188938	-3.49528	0.00047356	0.0200606
NTAN1	417.725	-0.472213	0.13528	3.49064	0.000481866	0.0203468
CPEB2	870.794	-0.437104	0.125361	3.48677	0.0004889	0.0204049
GLIPR2	195.928	-0.615268	0.176473	3.48646	0.000489457	0.0204049
HIP1R	100.238	-0.621335	0.178087	3.48894	0.000484946	0.0204049
ROR1	353.842	-0.568064	0.162906	3.48707	0.000488343	0.0204049
IFNGR1	835.302	0.611061	0.175526	-3.4813	0.000498977	0.0206706
TAF7	746.808	-0.303194	0.0870888	3.48143	0.000498741	0.0206706
LMOD1	286.984	-0.602449	0.173118	3.48	0.000501416	0.0207063
IGSF8	399.436	0.405675	0.11661	-3.47892	0.000503444	0.0207249
MT2A	1710.23	0.812472	0.234358	-3.4668	0.000526688	0.021614
CFB	89.1103	0.803979	0.23197	-3.46588	0.000528501	0.0216208
CDK5RAP2	1850.94	0.337183	0.0973518	-3.46355	0.000533088	0.0216734
PDE7B	873.67	0.535669	0.154624	-3.46433	0.000531564	0.0216734
HYOU1	2196.67	0.579095	0.167679	-3.4536	0.00055316	0.0223511
SLC25A28	194.269	0.479842	0.138921	-3.45405	0.000552236	0.0223511
MCC	659.187	0.531539	0.154046	-3.45053	0.000559495	0.0224688
2007-09-01	1696.05	-0.329514	0.0954775	3.45122	0.000558059	0.0224688
EPAS1	6966.6	0.689833	0.200554	-3.43963	0.0005825	0.0232489
GPR176	1127.03	0.632914	0.184003	-3.43969	0.000582375	0.0232489
SLC25A22	221.609	0.473972	0.137829	-3.43883	0.000584232	0.0232489
CLDN1	17.3468	0.858835	0.250115	-3.43376	0.000595277	0.0236169
KMT2E	1340.77	-0.194105	0.056574	3.43099	0.000601377	0.0236446
PDIA4	3857.33	0.561153	0.163491	-3.43232	0.000598438	0.0236446
SESTD1	700.848	-0.334111	0.0973766	3.43112	0.00060109	0.0236446
ARMC9	655.316	-0.698531	0.203769	3.42805	0.000607936	0.0237601
RBM47	62.8199	0.852584	0.24867	-3.42858	0.000606752	0.0237601
FMNL1	99.4779	0.84286	0.246141	-3.42429	0.000616398	0.0239483
MAMDC4	130.855	0.532911	0.155594	-3.42501	0.000614786	0.0239483
SVIL-AS1	1064.23	-0.380314	0.111154	3.4215	0.000622775	0.0241247
ST3GAL5	397.733	-0.634944	0.185664	3.41985	0.000626556	0.0241998
CFLAR	1157.37	0.714022	0.20885	-3.41882	0.000628929	0.0242202
FAM118B	179.019	-0.444393	0.130072	3.41653	0.000634251	0.0243538
FAM96B	393.057	0.290255	0.085012	-3.41428	0.000639511	0.024413
KCTD12	2959.85	-0.765051	0.224047	3.41469	0.000638551	0.024413
DLX5	125.43	-0.7953	0.232993	3.41341	0.000641559	0.0244201
DNAJB11	733.614	0.365086	0.10705	-3.41043	0.000648595	0.0246166
ALKBH7	318.073	0.326907	0.0960585	-3.40321	0.000665995	0.0252042
KRAS	429.333	-0.344816	0.101374	3.40141	0.000670388	0.0252975
BTBD1	862.873	-0.321759	0.0946212	3.4005	0.000672632	0.0253095
TMEM45A	380.649	0.449645	0.132374	-3.39677	0.000681862	0.0255835
CD14	39.2915	0.821877	0.242403	-3.39054	0.000697541	0.0260972
UACA	1411.48	-0.552034	0.16294	3.38796	0.000704136	0.0262691
HIC1	349.661	-0.795366	0.235404	3.37872	0.000728237	0.0270912
CTSS	162.698	0.841717	0.249673	-3.37128	0.000748191	0.0277549
CLPP	348.225	0.311868	0.0925398	-3.3701	0.000751409	0.0277958
CFAP69	187.141	0.770256	0.22865	-3.36871	0.000755202	0.0278576
MYO1E	1754.86	-0.593559	0.176591	3.36121	0.000776023	0.0285455
TTLL4	196.902	0.534825	0.159562	-3.35184	0.000802771	0.0294469
SECTM1	167.55	-0.63335	0.189296	3.34582	0.000820398	0.0300097
TIFA	123.027	0.504085	0.151013	-3.33802	0.00084378	0.0307792
BCL6	1305.91	0.462998	0.138792	-3.33591	0.000850194	0.0308419
CLEC3B	41.3769	-0.833685	0.24989	3.3362	0.000849308	0.0308419
ZFP30	96.9132	-0.474188	0.142309	3.3321	0.000861931	0.0311815
FAM110B	260.707	0.564314	0.169483	-3.32961	0.000869679	0.0313753
DMD	43.108	-0.811029	0.244017	3.32366	0.000888445	0.0317903
GMDS	555.047	0.525403	0.15804	-3.32449	0.000885802	0.0317903
RABGAP1L	256.431	-0.400253	0.120407	3.32417	0.000886806	0.0317903
HAS2	950.68	0.72808	0.219672	-3.3144	0.000918399	0.0326841
HDGF	2166.61	0.259188	0.0781913	-3.31479	0.000917104	0.0326841
PTPRK	1853.27	0.207802	0.0628377	-3.30697	0.000943122	0.0334732
SIRPA	807.168	0.538063	0.162979	-3.30143	0.000961928	0.0340486
ST8SIA1	344.882	-0.770262	0.233391	3.30031	0.000965785	0.0340932
PIK3CD	309.244	0.57086	0.173077	-3.2983	0.000972731	0.0342464
RPS6KA1	82.4355	0.744192	0.225892	-3.29445	0.000986133	0.0346254
ZC3H12C	377.701	0.528332	0.160721	-3.28726	0.00101166	0.035427
LOC100130417	26.9658	-0.800715	0.244046	3.281	0.00103441	0.0360562
RAB24	318.399	0.417418	0.12723	-3.2808	0.00103512	0.0360562
CANX	8089.78	0.269078	0.0820486	-3.27949	0.00103994	0.0361281
SRGN	2265.78	0.748305	0.228361	-3.27685	0.00104971	0.0363715
CTGF	8575.29	-0.552812	0.168924	3.27254	0.00106585	0.0368336
UPP1	264.419	0.38623	0.118283	-3.2653	0.00109347	0.037659
WDR86	247.658	0.815753	0.249864	-3.26479	0.00109547	0.037659
PHF21A	646.489	0.276068	0.0847145	-3.25881	0.00111881	0.0383608
DSTN	3886.71	-0.313327	0.0962218	3.2563	0.00112874	0.0386006
ALDH2	165.373	-0.563271	0.173062	3.25474	0.00113496	0.0387124
HES1	483.144	-0.679911	0.209024	3.2528	0.00114275	0.0388772
AGFG1	719.008	0.261474	0.0804261	-3.25111	0.00114956	0.0390079
CTNNA1	3222.65	-0.264547	0.0814786	3.24682	0.00116701	0.0394977
ENDOD1	574.767	-0.539983	0.166718	3.2389	0.00119991	0.040507
FZD8	688.134	-0.719943	0.222546	3.23503	0.0012163	0.040955
TSPAN4	1379.39	0.253582	0.0784364	-3.23296	0.00122516	0.0411477
ELL2	1290.95	0.37668	0.116552	-3.23187	0.00122985	0.0411999
MXRA8	8746.25	-0.22786	0.0705309	3.23063	0.00123516	0.0412727
ZDHHC24	137.217	0.412002	0.127594	-3.229	0.00124225	0.0414043
ENO2	694.78	0.380494	0.117892	-3.22747	0.00124891	0.0415207
TNIK	95.4599	0.803536	0.249039	-3.22654	0.00125295	0.0415499
SCARB1	147.724	0.686044	0.21301	-3.22071	0.00127875	0.0422987
KCNK15	1593.6	-0.620097	0.192766	3.21683	0.00129615	0.0427664
AQP1	98.5036	-0.771504	0.240185	3.21213	0.00131754	0.0431028
ARID4A	350.087	-0.31472	0.0979395	3.21341	0.00131168	0.0431028
CEMIP	9527.3	0.77265	0.240612	-3.21118	0.00132191	0.0431028
DNM3OS	326.974	-0.677459	0.210911	3.21207	0.00131783	0.0431028
FAIM3	46.7548	0.746813	0.23258	-3.211	0.00132275	0.0431028
DGKD	216.531	0.396104	0.123653	-3.20335	0.00135837	0.0441539
MERTK	14.5336	-0.799594	0.249679	3.20249	0.00136243	0.0441765
PRRX2	374.212	-0.455725	0.142588	3.19611	0.00139296	0.0450552
RIT1	308.349	-0.362244	0.113442	3.19322	0.00140697	0.0453962
RAMP1	67.6732	-0.797753	0.250745	3.18153	0.00146499	0.0471526
NFE2L1	4438.64	0.267542	0.0841378	-3.17981	0.00147373	0.0473179
FLOT2	838.092	0.274121	0.0862945	-3.17657	0.00149025	0.0474916
PPARD	733.577	0.353773	0.111392	-3.17592	0.00149361	0.0474916
PRKAB2	348.081	-0.309528	0.097448	3.17634	0.00149148	0.0474916
RRAD	1342.61	0.647211	0.203767	-3.17624	0.00149199	0.0474916
ARMCX3	1437.54	-0.189754	0.059772	3.17463	0.00150025	0.0475877
DNPEP	482.758	0.259626	0.0820985	-3.16237	0.00156491	0.0495191
GRPEL1	206.657	0.410969	0.130155	-3.15754	0.00159105	0.0502252
MAT2A	2863.82	-0.310345	0.0983345	3.15601	0.00159942	0.0502478
SLC40A1	1298.61	-0.784024	0.248396	3.15635	0.00159757	0.0502478
PENK	175.191	-0.553585	0.175707	3.15061	0.00162929	0.051064
PPIF	583.697	0.727961	0.231615	-3.14298	0.00167236	0.0522891
WIPI1	996.391	0.275684	0.0877958	-3.14006	0.00168913	0.0526879
AP2B1	2516.83	-0.221788	0.0709186	3.12737	0.0017638	0.054757
NPAS1	16.4587	-0.754114	0.241117	3.12759	0.00176245	0.054757
SMOX	888.402	0.565688	0.181036	-3.12472	0.00177973	0.0551214
IL32	32.7616	0.756623	0.242332	-3.12226	0.00179469	0.0553428
SMAD9	138.526	-0.691393	0.221447	3.12216	0.00179531	0.0553428
RGL1	806.657	-0.359268	0.115255	3.11716	0.001826	0.0561569
ZBTB8A	187.826	-0.501001	0.160967	3.11243	0.00185552	0.0569314
CCDC74A	145.154	-0.580515	0.187038	3.10373	0.00191097	0.0584961
SPAG9	1597.68	-0.212573	0.0685782	3.09971	0.0019371	0.0591581
ADCY8	19.3519	0.755499	0.24388	-3.09783	0.00194944	0.0593967
HEXIM1	856.264	0.385276	0.12448	-3.09507	0.00196764	0.0598126
HTR2A	24.0031	0.738385	0.238833	-3.09164	0.00199053	0.0603686
SEMA3E	16.13	-0.773714	0.250495	3.08875	0.00201003	0.0608196
NETO2	659.61	-0.577358	0.187194	3.08428	0.00204046	0.0615984
ARAF	574.469	0.288187	0.093584	-3.07945	0.00207381	0.0624617
NKX3-1	70.5373	0.696606	0.226598	-3.0742	0.0021107	0.0634272
TLR2	42.8444	0.745347	0.242701	-3.07105	0.00213308	0.0639535
FOXO1	175.842	-0.588336	0.191802	3.06742	0.00215915	0.0642948
IRAK2	220.588	0.660901	0.215433	-3.06777	0.0021566	0.0642948
RWDD1	431.32	-0.306909	0.100015	3.06862	0.00215051	0.0642948
HIVEP3	212.14	0.489051	0.159619	-3.06386	0.002185	0.0648588
SVIL	3344.85	-0.395544	0.129117	3.06345	0.00218797	0.0648588
PPP1R3B	220.946	-0.529829	0.173109	3.06067	0.00220841	0.0653172
KIAA1683	130.376	0.714723	0.233899	-3.05568	0.00224548	0.0661157
KPNA1	626.071	-0.238253	0.077963	3.05597	0.00224333	0.0661157
TLE3	670.125	0.338882	0.110994	-3.05316	0.00226448	0.0665259
2009-09-01	2653.89	-0.231163	0.0758084	3.04931	0.0022937	0.06714
ST6GALNAC6	1065.67	-0.217038	0.0711821	3.04906	0.0022956	0.06714
TCF7	174.285	-0.725439	0.238176	3.04581	0.00232058	0.0677196
APBA2	136.778	0.7056	0.232148	-3.03945	0.00237013	0.0690124
KBTBD11	27.6559	-0.716441	0.235915	3.03686	0.00239056	0.0693591
TGFBR1	1560.01	0.435298	0.14335	-3.0366	0.0023926	0.0693591
EMID1	119.887	0.755338	0.24948	-3.02765	0.00246466	0.0711339
RAB13	1342.89	0.448972	0.148284	-3.02777	0.00246362	0.0711339
TIPARP	1264.22	-0.503578	0.166391	3.02648	0.0024742	0.0712525
ARHGEF6	458.464	-0.375235	0.124038	3.02516	0.00248502	0.071264
DUSP18	84.7806	-0.472273	0.156135	3.02478	0.00248818	0.071264
PIM3	797.526	0.427394	0.141313	-3.02445	0.00249088	0.071264
IL17RC	531.835	0.312335	0.103383	-3.02114	0.00251824	0.0717344
NXPE3	542.724	-0.30527	0.101044	3.02117	0.00251803	0.0717344
EXT2	2134.73	0.3852	0.127588	-3.0191	0.00253528	0.0717893
MAPRE2	551.027	-0.357742	0.118454	3.0201	0.00252693	0.0717893
RCN1	4378.35	0.409193	0.135542	-3.01894	0.00253657	0.0717893
PFKFB2	127.525	-0.387783	0.128567	3.01618	0.00255978	0.0722904
PCDH19	122.306	-0.745715	0.247426	3.0139	0.00257915	0.0726811
SLC22A5	64.5349	0.542438	0.180073	-3.01232	0.00259259	0.0729034
IGFLR1	18.8628	0.739324	0.245518	-3.01129	0.00260143	0.0729957
PFKL	1659.52	0.312067	0.103762	-3.00752	0.0026339	0.0735923
SCN1B	154.613	-0.490483	0.163082	3.00758	0.00263333	0.0735923
GREM2	471.59	-0.720126	0.239516	3.00659	0.00264198	0.0736614
ACYP1	37.124	0.632572	0.210864	-2.9999	0.00270069	0.0751386
CPD	2209.19	0.554474	0.18505	-2.99635	0.00273236	0.0758365
CRMP1	219.252	-0.339749	0.113409	2.99579	0.00273732	0.0758365
NAA38	294.672	0.433197	0.144773	-2.99224	0.00276936	0.0765626
SSFA2	1686.72	-0.453236	0.151709	2.98753	0.0028124	0.0774265
TMEM208	216.746	0.328622	0.109988	-2.98779	0.00280999	0.0774265
INAFM2	131.742	-0.469818	0.15739	2.98505	0.00283534	0.0778948
PRR16	274.63	0.439694	0.14737	-2.9836	0.00284875	0.0780997
SLC15A3	186.713	0.431212	0.144684	-2.98037	0.00287899	0.0787643
PDGFRA	13259.5	0.525301	0.176339	-2.97892	0.00289266	0.0789738
PLAT	918.528	-0.718103	0.241114	2.97827	0.00289881	0.0789775
ACSL4	4902.18	0.727751	0.244562	-2.97573	0.00292295	0.0794704
NAB1	533.529	0.347329	0.116797	-2.97378	0.00294155	0.0798108
ANKMY2	226.336	-0.353631	0.11902	2.9712	0.00296638	0.0799004
HIF1A-AS1	836.857	0.578716	0.194753	-2.97154	0.00296306	0.0799004
RALA	515.213	-0.334027	0.112432	2.97091	0.00296919	0.0799004
TMEM164	269.239	0.629837	0.211957	-2.97153	0.00296317	0.0799004
TGFBR2	3840.04	-0.494767	0.166674	2.96847	0.00299289	0.0803735
PDCD10	250.906	-0.306946	0.103424	2.96783	0.0029991	0.080376
SOCS1	51.2826	-0.609582	0.205539	2.96577	0.00301922	0.0807503
PTMA	5152.83	0.302405	0.10217	-2.95981	0.00307829	0.0821628
RAB11FIP1	65.0374	0.71436	0.241815	-2.95416	0.00313519	0.0835119
GALE	147.917	0.384304	0.13035	-2.94825	0.00319577	0.0846333
MROH8	291.542	0.437344	0.148344	-2.94817	0.00319663	0.0846333
PNPLA2	962.713	0.294108	0.0997429	-2.94866	0.00319156	0.0846333
PVRL2	692.279	0.316969	0.107632	-2.94493	0.00323033	0.0853534
PTGES	806.957	0.737424	0.250564	-2.94306	0.00324982	0.0856961
ALDH3A2	1300.29	-0.477371	0.162312	2.94107	0.0032708	0.0859043
THAP4	345.761	0.262152	0.0891255	-2.94138	0.00326755	0.0859043
SH3D21	51.64	0.685524	0.233244	-2.93908	0.00329183	0.0862842
CEBPB-AS1	1190.66	0.57081	0.194278	-2.93811	0.00330222	0.086384
RASSF4	90.177	0.596287	0.203167	-2.93496	0.00333586	0.0870905
BTBD10	268.435	-0.302386	0.103157	2.93133	0.00337511	0.0872775
LAMB2	6190.9	0.286635	0.0977185	-2.93327	0.00335413	0.0872775
MCOLN3	68.6678	-0.517094	0.17645	2.93055	0.00338368	0.0872775
NDRG3	455.488	-0.291499	0.0994498	2.93112	0.00337747	0.0872775
P4HB	13858.7	0.500951	0.170946	-2.93047	0.00338455	0.0872775
PRKAR2A	315.874	-0.29255	0.0997871	2.93174	0.00337069	0.0872775
SEMA7A	844.2	0.424465	0.144868	-2.93001	0.00338954	0.0872775
OSMR	5579.62	0.523222	0.178681	-2.92826	0.0034087	0.0875989
SEC22B	1470.38	0.191705	0.0654886	-2.92731	0.00341911	0.0876948
CALU	8083.41	0.197385	0.0674739	-2.92536	0.0034406	0.0877321
IL18R1	85.5832	0.731364	0.249971	-2.9258	0.00343576	0.0877321
SQRDL	416.507	0.415981	0.142166	-2.92603	0.00343316	0.0877321
RASSF9	83.1664	-0.562115	0.192501	2.92006	0.00349969	0.0890656
EEF1D	3009.27	0.23231	0.0796702	-2.9159	0.00354664	0.0896151
MAPK1	1359.5	-0.24873	0.0853061	2.91573	0.00354857	0.0896151
MORN4	126.812	-0.380681	0.130553	2.91591	0.00354651	0.0896151
NEK1	370.884	-0.26772	0.0917787	2.91702	0.00353396	0.0896151
OXR1	707.37	-0.264242	0.0906782	2.91406	0.00356763	0.0899235
GPR108	493.86	0.325494	0.112038	-2.90521	0.00367004	0.0923277
TGFBR3	1259.46	-0.443857	0.152928	2.9024	0.00370316	0.0929827
PIEZO1	2725.68	0.408524	0.14083	-2.90083	0.00372171	0.09327
CILP2	351.43	-0.683558	0.235756	2.89943	0.00373847	0.0935115
AGA	252.658	0.372096	0.128365	-2.89873	0.00374676	0.0935408
SNX7	572.532	-0.316879	0.109346	2.89795	0.00375616	0.0935974
RNF128	34.9624	-0.670096	0.231746	2.89151	0.003834	0.0953563
LRRC8B	88.5	0.504467	0.174654	-2.88838	0.00387229	0.0961264
EPSTI1	437.246	0.590239	0.204395	-2.88774	0.00388019	0.0961408
PEBP1	1922.88	-0.318426	0.110415	2.8839	0.0039278	0.0967769
RPN2	3639.57	0.469021	0.162635	-2.88389	0.00392797	0.0967769
TUBA1A	3496.57	-0.45021	0.156077	2.88455	0.00391975	0.0967769
UGGT2	779.796	0.445952	0.154686	-2.88295	0.00393964	0.0968827
FOXQ1	59.4923	-0.71972	0.249777	2.88145	0.00395855	0.0971657
LOC113230	19.802	-0.697255	0.242102	2.88001	0.00397666	0.0974282
DHRS13	70.6576	0.620499	0.215526	-2.879	0.00398936	0.0974894
XBP1	1776.54	0.370063	0.128555	-2.87863	0.00399401	0.0974894
H6PD	2693.01	0.239227	0.0831927	-2.87558	0.00403289	0.0980795
SLC38A3	40.6481	0.69817	0.242795	-2.87556	0.00403312	0.0980795
SMC6	294.814	-0.331487	0.115423	2.87192	0.00407981	0.0990316
LINC01547	75.9991	0.717529	0.249893	-2.87134	0.00408736	0.0990318
ST8SIA5	47.1504	-0.712843	0.248344	2.87039	0.00409963	0.0991461
TSC22D3	433.964	-0.518039	0.18071	2.8667	0.0041478	0.100127
IFFO1	397.228	-0.3816	0.133304	2.86263	0.00420142	0.101235
ARAP3	148.228	0.607605	0.212711	-2.85649	0.00428358	0.102649
PDCD5	305.273	0.328501	0.114965	-2.85741	0.00427117	0.102649
SPRED1	1504.09	-0.436968	0.152953	2.85688	0.00427825	0.102649
EML4	842.24	-0.254014	0.0890216	2.8534	0.00432538	0.103087
GALNT1	6698.83	0.575873	0.201776	-2.85402	0.00431695	0.103087
METTL1	88.7216	0.449765	0.157611	-2.85365	0.00432205	0.103087
DIXDC1	571.985	-0.432564	0.151656	2.85227	0.00434077	0.103266
ADCK4	275.513	0.425512	0.149341	-2.84926	0.00438214	0.103883
GLRX	404.194	0.563617	0.197853	-2.84866	0.00439041	0.103883
PLA2G5	29.3011	-0.711718	0.249828	2.84883	0.00438797	0.103883
RRAGC	494.267	-0.422451	0.148407	2.84658	0.00441923	0.104376
WDR47	288.712	-0.312052	0.10965	2.84589	0.00442873	0.104413
CSRNP3	102.685	-0.622511	0.218801	2.84511	0.00443966	0.104483
ADA	275.811	-0.637366	0.224103	2.84408	0.00445398	0.104633
SULF2	1788.72	0.690787	0.243224	-2.84012	0.00450959	0.10575
HSD17B10	294.602	0.33962	0.119693	-2.83742	0.00454796	0.10627
MAFF	748.613	0.546424	0.192541	-2.83796	0.00454031	0.10627
PDE4B	193.281	0.557149	0.19656	-2.8345	0.00458971	0.107052
TGFB3	322.964	-0.557195	0.196615	2.83394	0.00459774	0.107052
QPCTL	144.833	0.489727	0.173071	-2.82963	0.00466026	0.108316
ZC2HC1A	273.889	-0.423683	0.149776	2.82878	0.00467261	0.108411
YPEL1	118.19	-0.422462	0.149436	2.82703	0.00469813	0.108811
SHB	240.419	0.573011	0.202855	-2.82473	0.00473201	0.109403
AKR1B1	1938.46	0.643578	0.228005	-2.82265	0.00476289	0.109684
CNPPD1	406.936	-0.295078	0.104587	2.82137	0.00478194	0.109684
TBL1XR1	1332.69	0.294425	0.104365	-2.8211	0.00478593	0.109684
VPS39	934.645	-0.200792	0.0711541	2.82192	0.00477366	0.109684
ZFP36L2	1692.49	-0.505665	0.179147	2.82263	0.00476318	0.109684
BRCA2	37.5056	0.641816	0.227607	-2.81985	0.00480464	0.109921
CMTM3	651.937	-0.410404	0.14567	2.81735	0.00484212	0.110216
COX17	102.323	0.399374	0.141757	-2.81731	0.00484273	0.110216
PDIA6	4643.86	0.490198	0.173967	-2.81777	0.00483591	0.110216
AMOTL1	1530.37	-0.392424	0.139335	2.81641	0.00485634	0.110335
STAT3	3593.63	0.279593	0.0993584	-2.81398	0.0048932	0.11098
ARRDC3	1672.99	-0.469375	0.166977	2.81102	0.00493847	0.111621
SCUBE1	19.6388	-0.699888	0.248954	2.81131	0.00493395	0.111621
IL17RD	180.602	-0.637256	0.226814	2.8096	0.00496032	0.111922
PDGFD	551.422	0.647806	0.230618	-2.809	0.00496954	0.111938
CXXC5	1023.78	-0.263225	0.0937346	2.80819	0.00498208	0.112029
EMILIN1	14208.4	0.526385	0.187584	-2.80613	0.00501407	0.112204
LCNL1	89.6252	0.558072	0.198821	-2.80691	0.0050019	0.112204
PON2	570.95	0.492908	0.17566	-2.80604	0.00501552	0.112204
ATP6V1C2	1729.02	0.458162	0.163314	-2.8054	0.00502535	0.112233
CALR	15411.2	0.402981	0.143792	-2.80253	0.00507027	0.112884
CCDC69	170.233	0.688096	0.245534	-2.80244	0.00507169	0.112884
NHSL2	52.5427	-0.69636	0.248534	2.80187	0.00508072	0.112893
BROX	474.778	-0.27314	0.0976429	2.79733	0.00515265	0.113758
HOXC9	88.3952	-0.462544	0.165358	2.79723	0.00515428	0.113758
PRMT1	875.706	0.293318	0.104811	-2.79853	0.00513352	0.113758
TPP1	1947.36	-0.277836	0.0993022	2.79788	0.00514392	0.113758
ATP2C1	1421.38	0.457082	0.163506	-2.7955	0.00518187	0.114165
RPN1	2802.86	0.261523	0.0935685	-2.79499	0.00519013	0.114165
CSGALNACT1	217.912	0.694451	0.248806	-2.79114	0.00525234	0.115341
HDAC1	665.792	0.255842	0.0917062	-2.7898	0.00527403	0.115624
AGPAT3	881.324	0.233325	0.0837796	-2.78499	0.00535298	0.116964
PXK	752.666	-0.325792	0.116978	2.78508	0.00535146	0.116964
PTGFR	2258.66	0.644559	0.231583	-2.78327	0.0053814	0.11739
PCDHGC3	2943.33	-0.388341	0.139586	2.7821	0.00540079	0.117617
AKIRIN2	505.028	-0.397137	0.14282	2.78068	0.00542459	0.117887
CD200	87.622	0.675119	0.242871	-2.77975	0.00544011	0.117887
HIF1A	8633.15	0.520252	0.187145	-2.77995	0.00543679	0.117887
C5orf51	530.733	-0.288033	0.103642	2.77912	0.0054506	0.11792
RNF144A	548.311	-0.518947	0.186785	2.77831	0.00546424	0.11802
MORC3	426.649	-0.311993	0.112455	2.77439	0.00553049	0.119255
LIMS2	53.3924	-0.684749	0.247055	2.77165	0.00557731	0.120068
MOB1B	544.655	-0.254196	0.0917342	2.77101	0.00558829	0.120107
RIMS4	164.8	-0.598248	0.215963	2.77014	0.00560314	0.120229
MEF2A	1086.33	-0.339503	0.122603	2.76913	0.00562058	0.120276
PLOD3	1535.11	0.380915	0.137566	-2.76896	0.00562361	0.120276
CCDC57	261.807	0.431296	0.155808	-2.76813	0.00563793	0.120386
BBS2	432.356	-0.374193	0.135294	2.76577	0.00567887	0.120405
BMPR2	1468.78	-0.309685	0.111976	2.76564	0.00568106	0.120405
DUSP16	298.781	0.564648	0.204165	-2.76564	0.00568108	0.120405
ITGB8	831.512	0.492408	0.177977	-2.7667	0.00566266	0.120405
KAZN	279.6	-0.474842	0.171753	2.76468	0.00569793	0.120405
MXD3	442.981	0.291072	0.105293	-2.76438	0.00570303	0.120405
TMEM88	49.8638	0.677941	0.245215	-2.76468	0.00569779	0.120405
KLF6	3933.31	-0.430042	0.155722	2.76159	0.00575202	0.121245
ASPHD1	93.8509	0.484285	0.175496	-2.75952	0.00578859	0.12182
ZC3H7A	651.203	-0.24076	0.0872802	2.75847	0.00580729	0.122018
PDE4D	195.285	0.681258	0.2472	-2.7559	0.00585317	0.122395
RPUSD1	169.354	0.325472	0.118076	-2.75646	0.00584309	0.122395
RSPO3	38.3505	0.674847	0.244829	-2.7564	0.00584422	0.122395
ADAMTS14	225.802	-0.682493	0.248174	2.75006	0.00595852	0.1244
DHRS1	205.528	-0.344316	0.125418	2.74534	0.00604487	0.126002
DOK3	25.6061	0.659341	0.240524	-2.74126	0.00612035	0.127373
SLC22A4	47.0403	0.641151	0.233964	-2.74038	0.00613674	0.127512
C11orf95	798.991	-0.259422	0.0947475	2.73804	0.00618068	0.127818
SEC23B	393.009	0.235871	0.0861443	-2.73809	0.00617976	0.127818
TMEM189	227.721	0.456422	0.166683	-2.73826	0.00617652	0.127818
COL26A1	17.7636	-0.504391	0.184348	2.73608	0.00621767	0.128226
HSPA5	10687.8	0.34689	0.126789	-2.73596	0.00621992	0.128226
QSOX2	290.531	0.351666	0.128571	-2.73519	0.00623437	0.128322
CYBRD1	7646.57	-0.356432	0.130362	2.73417	0.00625375	0.12852
DCN	25138	0.649601	0.237723	-2.73259	0.00628378	0.128734
GPNMB	4952.65	-0.505886	0.185114	2.73284	0.00627905	0.128734
WIPF1	2253.31	-0.598716	0.219299	2.73014	0.00633073	0.129494
LAMA3	835.949	-0.549164	0.201238	2.72893	0.00635403	0.129583
PALLD	2493.56	-0.350757	0.128535	2.72889	0.00635481	0.129583
AK4	267.995	0.585493	0.214616	-2.7281	0.0063701	0.129693
GPR56	14.8331	0.683495	0.250614	-2.72728	0.0063859	0.129814
MSR1	23.6065	-0.661387	0.2428	2.724	0.00644969	0.130908
BCKDHA	334.904	0.423747	0.155742	-2.72083	0.00651174	0.131963
C11orf71	28.1032	0.612543	0.2253	-2.71879	0.00655217	0.132578
E2F7	45.7438	-0.613212	0.225712	2.71679	0.0065919	0.133177
BDNF	213.93	0.645163	0.237618	-2.71513	0.00662503	0.13364
HIP1	829.915	-0.290963	0.107197	2.71427	0.00664223	0.133782
UGCG	1253.6	0.597738	0.220445	-2.7115	0.00669792	0.134697
SUPT4H1	419.548	-0.266832	0.0984735	2.70968	0.00673482	0.135025
ZNF578	34.3379	-0.558675	0.206162	2.70988	0.00673076	0.135025
CAB39	727.377	-0.288178	0.106656	2.70194	0.00689358	0.137161
FGFR3	34.167	-0.676422	0.250327	2.70215	0.0068892	0.137161
PC	585.573	0.2778	0.102766	-2.70323	0.00686691	0.137161
PLA2G4C	37.2054	0.608295	0.225096	-2.70239	0.00688438	0.137161
SH3BGRL	1679.69	-0.307484	0.113772	2.70263	0.0068794	0.137161
GPR155	198.587	-0.437156	0.161862	2.7008	0.00691735	0.137426
LOC100507642	15.154	0.674737	0.249996	-2.69899	0.00695503	0.137966
ITPRIPL2	1655.46	-0.279096	0.103452	2.69784	0.00697918	0.138236
PAFAH1B2	922.734	-0.237814	0.0881921	2.69655	0.00700615	0.138561
ADPGK	623.518	0.366659	0.136063	-2.69477	0.00704369	0.139094
ABL1	3248.8	0.27362	0.101562	-2.69413	0.00705721	0.139152
IBSP	359.715	0.615	0.228612	-2.69014	0.00714217	0.140286
PHLDB2	621.023	-0.332571	0.123636	2.68993	0.00714678	0.140286
SLC25A5-AS1	308.56	0.366544	0.136224	-2.69075	0.00712926	0.140286
PTPRN	177.086	0.663637	0.246839	-2.68855	0.00717641	0.140658
S100A13	785.061	-0.486402	0.181029	2.68687	0.00721261	0.141156
REEP3	1270.11	-0.16737	0.0623038	2.68636	0.00722359	0.141161
HSPB7	298.986	-0.666985	0.248496	2.68409	0.00727281	0.141738
RAB2B	275.298	-0.260057	0.0968914	2.684	0.0072747	0.141738
APOL3	81.5457	0.555672	0.207093	-2.6832	0.00729222	0.141869
RNF14	371.946	-0.286179	0.106681	2.68257	0.00730582	0.141923
APOD	52.452	-0.671496	0.250417	2.68151	0.00732898	0.142124
LOC101929415	59.1523	-0.458878	0.171181	2.68067	0.00734759	0.142124
LYN	71.9266	0.613405	0.22883	-2.68062	0.00734863	0.142124
FOXC1	1396.04	0.531057	0.1982	-2.6794	0.00737533	0.142259
PAICS	835.708	0.262174	0.097851	-2.67931	0.0073773	0.142259
PPP1CC	991.889	-0.198671	0.07422	2.67678	0.00743336	0.14313
TSPAN11	1077.88	-0.611459	0.228696	2.67368	0.00750246	0.144249
DSTYK	524.05	-0.29077	0.108834	2.67169	0.00754699	0.144889
GDE1	773.207	-0.182044	0.0681582	2.6709	0.00756474	0.144889
PDIA3	6163.93	0.400963	0.150133	-2.67072	0.00756885	0.144889
ZCCHC14	1227.18	-0.374565	0.140371	2.6684	0.00762135	0.145682
IL34	120.158	0.653778	0.245189	-2.66642	0.0076663	0.146328
MPDZ	918.274	-0.223384	0.083832	2.66467	0.00770646	0.146881
LRRC58	858.355	-0.260295	0.0977327	2.66334	0.00773692	0.147248
DNAJC1	369.805	0.247937	0.0931366	-2.66207	0.00776606	0.147589
KIAA0195	628.445	0.221834	0.0833751	-2.66068	0.00779838	0.147989
COQ2	114.12	0.530671	0.199494	-2.66008	0.00781219	0.148037
COX5B	579.088	0.346803	0.130443	-2.65866	0.00784526	0.148236
TMEM119	3447.19	-0.52427	0.197183	2.6588	0.00784187	0.148236
ALG3	240.143	0.306763	0.115468	-2.6567	0.00789107	0.148461
ATP6V0B	623.986	0.348453	0.131149	-2.65693	0.00788554	0.148461
BRPF3	611.043	0.228916	0.0861425	-2.65741	0.00787432	0.148461
PIK3IP1	129.992	-0.606757	0.228457	2.65589	0.00790985	0.148601
KDM6B	1094.64	0.496239	0.186981	-2.65395	0.0079555	0.149245
LRP12	584.328	-0.237281	0.0894258	2.65338	0.00796894	0.149284
CYSTM1	268.432	-0.427843	0.16136	2.65149	0.00801381	0.149833
EPS15	674.001	-0.283391	0.106892	2.65118	0.00802107	0.149833
TMEM117	121.482	-0.416617	0.157331	2.64802	0.00809636	0.151025
GLTSCR1	201.277	0.329791	0.124616	-2.64645	0.00813408	0.151238
TAB3	301.809	0.335682	0.126853	-2.64623	0.00813944	0.151238
VOPP1	676.336	-0.331928	0.12544	2.64611	0.00814237	0.151238
SFXN3	890.53	-0.357572	0.135161	2.64553	0.00815639	0.15127
SLC2A1	715.815	0.43026	0.162664	-2.64508	0.00816712	0.15127
FMOD	364.965	0.662071	0.250525	-2.64273	0.0082241	0.152111
LINC00152	139.761	0.437705	0.165714	-2.64134	0.008258	0.152523
VPS18	348.076	-0.31429	0.119085	2.6392	0.0083102	0.153272
HARS2	236.083	-0.331468	0.125695	2.63709	0.00836211	0.154013
EDF1	1564.48	0.246116	0.0935684	-2.63033	0.00853026	0.15642
KCNK2	1132.66	-0.616185	0.234232	2.63066	0.00852189	0.15642
MAP3K5	386.936	0.400382	0.15221	-2.63046	0.00852695	0.15642
RYBP	814.799	-0.243855	0.0927231	2.62992	0.00854044	0.15642
EIF1B	542.881	0.402592	0.153252	-2.627	0.00861416	0.15755
ATP1A1	3982.23	0.314709	0.119884	-2.62512	0.00866195	0.158204
BCAM	142.285	0.641164	0.244605	-2.62122	0.00876156	0.159486
PHAX	576.585	-0.245165	0.0935408	2.62095	0.0087686	0.159486
S1PR3	459.295	0.656292	0.250373	-2.62126	0.00876067	0.159486
ADAT2	72.4937	-0.469503	0.179243	2.61937	0.00880918	0.160003
CCDC152	1513.04	-0.604305	0.230832	2.61794	0.00884617	0.160453
LPCAT1	443.518	0.215531	0.0823637	-2.61682	0.00887519	0.160757
SLC20A1	3236.19	-0.519169	0.198445	2.61619	0.00889177	0.160836
KANK2	4076.65	-0.458799	0.175629	2.61232	0.00899291	0.162441
TLE1	346.608	0.435866	0.167033	-2.60945	0.00906872	0.163586
CREBL2	665.271	-0.21041	0.0806873	2.60773	0.00911461	0.164039
ZNF330	197.354	-0.33328	0.127813	2.60757	0.00911883	0.164039
CYC1	536.868	0.291831	0.111944	-2.60695	0.00913537	0.164047
DDHD2	477.84	-0.290248	0.111411	2.60521	0.00918176	0.164047
FAM178A	415.918	-0.257006	0.0986245	2.6059	0.00916331	0.164047
IL11RA	457.968	-0.407492	0.156397	2.6055	0.009174	0.164047
PHF14	408.761	-0.255603	0.0980737	2.60624	0.00915426	0.164047
PFKFB4	111.33	0.54876	0.21078	-2.60348	0.00922835	0.164656
ENTPD3	28.9529	0.612128	0.235316	-2.6013	0.00928707	0.165479
LRRC16A	121.515	-0.381077	0.146617	2.59914	0.00934588	0.166301
LMNA	16395.7	-0.272142	0.104734	2.59841	0.00936579	0.166411
PIM2	140.909	0.643023	0.247553	-2.59752	0.00939006	0.166411
SERPINI1	275.017	-0.650561	0.250434	2.59773	0.00938415	0.166411
TYW3	245.139	-0.265746	0.102397	2.59527	0.00945179	0.167279
IMPDH2	1452	0.162501	0.0626577	-2.59347	0.0095012	0.167615
MEGF8	2213.45	0.262746	0.101322	-2.59319	0.00950909	0.167615
TMEM194B	81.8217	0.504506	0.194524	-2.59354	0.00949933	0.167615
PSMD3	1025.59	0.195057	0.0752918	-2.59068	0.00957876	0.168617
LRRC8A	945.469	-0.257923	0.0995977	2.58965	0.00960743	0.168895
ATF7	1018.88	-0.225188	0.0870018	2.58831	0.0096447	0.169324
CRLF1	60.0647	-0.641236	0.247915	2.58652	0.00969512	0.169982
SMAD5	992.069	-0.223845	0.0866158	2.58434	0.00975648	0.170829
TRMT1L	143.773	-0.414256	0.160347	2.5835	0.00978026	0.171018
CUX1	1099.49	0.217803	0.0843399	-2.58244	0.00981055	0.171319
DCLK1	234.331	-0.562864	0.218052	2.58133	0.00984218	0.171643
NCBP2	725.407	-0.175837	0.0681495	2.58016	0.00987541	0.171767
SERPINF1	6401.65	-0.351862	0.136349	2.5806	0.00986278	0.171767
OBFC1	259.612	-0.333987	0.129526	2.57853	0.0099222	0.171898
PITPNM2	308.389	-0.363833	0.141089	2.57874	0.00991604	0.171898
TRIM32	266.049	-0.317343	0.12306	2.57876	0.0099156	0.171898
EDEM1	842.61	0.198103	0.0768739	-2.57699	0.00996659	0.17223
MIER1	602.811	-0.214426	0.083224	2.5765	0.00998074	0.17223
TNKS	926.472	-0.18922	0.0734327	2.57678	0.00997264	0.17223
GALNT18	95.9509	0.644562	0.25026	-2.57557	0.0100074	0.172464
SERINC5	1034.01	-0.444465	0.172628	2.5747	0.0100328	0.172675
PRDX2	1155.61	0.317128	0.12338	-2.57033	0.0101602	0.174638
PDIA3P1	983.849	0.390044	0.151786	-2.5697	0.0101787	0.174727
FAM102B	290.05	-0.363049	0.141306	2.56925	0.010192	0.174728
GATA6	167.681	0.639445	0.249118	-2.56684	0.0102631	0.175137
IPO11	118.29	-0.340318	0.132593	2.56663	0.0102692	0.175137
MSH2	225.737	-0.332024	0.129348	2.56689	0.0102614	0.175137
TGM2	1279.66	0.602667	0.234713	-2.56768	0.0102383	0.175137
PFDN1	385.427	-0.222506	0.0867351	2.56536	0.010307	0.175554
TMEM168	382.461	0.28385	0.11069	-2.56438	0.0103361	0.175821
SEPP1	2031.55	-0.580148	0.226523	2.5611	0.0104341	0.177258
SLC38A10	2360.88	0.342035	0.133583	-2.56046	0.0104533	0.177355
GLIS2	649.195	-0.350547	0.136953	2.55962	0.0104786	0.177554
MIIP	156.24	0.335225	0.130994	-2.55909	0.0104948	0.1776
ADAMTSL2	130.462	-0.641035	0.250673	2.55725	0.0105503	0.17831
CBFB	650.512	-0.335702	0.131399	2.55482	0.0106242	0.179327
WWTR1	3898.48	-0.411539	0.1613	2.55138	0.0107297	0.180877
CCNL1	1493.58	0.39131	0.153464	-2.54984	0.0107772	0.181443
TRIP10	638.573	0.252511	0.0990725	-2.54875	0.0108108	0.181777
PLEKHF1	192.119	-0.56801	0.223002	2.54711	0.010862	0.182405
F2R	213.482	-0.632412	0.248407	2.54587	0.0109006	0.182604
RIC1	606.693	-0.243049	0.0954693	2.54583	0.0109017	0.182604
MAN2B2	1976.03	0.28004	0.110154	-2.54225	0.011014	0.18425
MYADM	4811.09	-0.267465	0.105354	2.53873	0.0111255	0.185698
PLK2	962.712	0.424566	0.167243	-2.53863	0.0111289	0.185698
IFITM3	5329.12	0.431331	0.170047	-2.53654	0.0111955	0.186449
ZFP14	82.121	-0.466971	0.184113	2.53633	0.0112023	0.186449
ARL13B	195.948	-0.32197	0.126983	2.53553	0.0112276	0.186634
BAG4	253.828	-0.317042	0.125136	2.53357	0.0112907	0.187445
CRELD2	602.932	0.357017	0.141019	-2.53169	0.0113516	0.188121
JMJD1C	906.861	-0.166313	0.0657199	2.53064	0.0113854	0.188121
POFUT1	1008.04	0.183944	0.0726658	-2.53136	0.011362	0.188121
UBA5	426.965	-0.369	0.145818	2.53054	0.0113887	0.188121
PCSK5	484.686	0.632856	0.250175	-2.52966	0.0114174	0.188359
RASSF3	118.046	-0.510351	0.201805	2.52893	0.0114411	0.188512
RPL23AP82	187.596	-0.395868	0.156597	2.52793	0.0114736	0.188811
SCYL1	1111.89	0.222179	0.088001	-2.52473	0.0115786	0.190062
TMED1	473.903	0.336458	0.133247	-2.52507	0.0115675	0.190062
MYLIP	228.583	-0.597321	0.23663	2.52428	0.0115936	0.190071
TBX3	618.424	0.51467	0.203994	-2.52296	0.011637	0.190546
DARS	786.931	0.219465	0.0870417	-2.52137	0.0116898	0.19117
LIX1L	542.769	-0.246354	0.0977392	2.52053	0.0117179	0.191393
MAML2	727.737	0.249193	0.0989434	-2.51855	0.0117841	0.192234
MYO6	660.36	-0.381325	0.151505	2.51691	0.0118389	0.192464
THAP10	17.6097	-0.600222	0.238526	2.51638	0.0118568	0.192464
VAT1	3499.71	-0.416689	0.16558	2.51654	0.0118512	0.192464
ZC3H13	795.777	-0.235362	0.0934945	2.51738	0.011823	0.192464
ANKRD29	245.543	-0.593175	0.235898	2.51454	0.0119188	0.193053
ITPRIP	1660.48	-0.331768	0.131984	2.51369	0.0119474	0.193053
PTPN13	2323.79	-0.254568	0.101245	2.51438	0.011924	0.193053
TRAPPC6B	279.511	-0.275232	0.109499	2.51356	0.0119519	0.193053
TMEM8B	326.587	-0.263967	0.105045	2.51288	0.011975	0.193188
UNC5B	2218.73	-0.580685	0.231142	2.51225	0.0119964	0.193297
DCK	169.522	-0.364572	0.145212	2.51061	0.0120522	0.193958
LDB2	347.854	-0.380841	0.151728	2.51002	0.0120724	0.194044
DPY19L4	647.149	-0.214128	0.0853357	2.50924	0.0120991	0.194236
GAS6-AS1	2694.98	0.34139	0.136203	-2.50649	0.0121938	0.195518
CRYAB	307.054	-0.357459	0.142701	2.50494	0.0122471	0.196133
GINM1	971.958	0.398215	0.159167	-2.50187	0.012354	0.197604
HERC3	186.689	-0.323641	0.129425	2.5006	0.0123984	0.198072
SH3RF2	70.0334	0.606209	0.242474	-2.5001	0.0124157	0.198109
USP54	155.276	0.424401	0.169891	-2.49807	0.012487	0.199004
GAB2	272.398	0.403116	0.161541	-2.49545	0.0125798	0.199997
LPAR1	2526.92	0.310025	0.12423	-2.49557	0.0125756	0.199997
FBXW5	1390.45	0.230557	0.092489	-2.4928	0.0126739	0.201006
MANF	714.613	0.413458	0.165851	-2.49294	0.0126689	0.201006
JOSD1	743.122	-0.208429	0.0836671	2.49117	0.0127323	0.20169
ZNF408	126.639	-0.386906	0.155393	2.48987	0.0127792	0.202188
EMC1	1244.92	0.334939	0.134675	-2.48702	0.0128818	0.203566
CHEK2	99.7392	0.380201	0.152911	-2.48642	0.0129035	0.203664
MAGI3	136.59	-0.369602	0.1487	2.48555	0.0129351	0.203918
CORO2B	511.081	-0.365278	0.147086	2.48342	0.0130126	0.204858
CUTC	100.307	0.42438	0.17091	-2.48306	0.0130259	0.204858
BRD4	948.33	0.201957	0.0813513	-2.48253	0.0130454	0.204919
CD320	375.769	0.421696	0.17003	-2.48013	0.0131333	0.205317
EFNA5	349.004	-0.429211	0.172984	2.48122	0.0130933	0.205317
FIBIN	1026.76	0.561912	0.226533	-2.48048	0.0131205	0.205317
POU2F2	263.662	0.616292	0.248415	-2.4809	0.0131051	0.205317
BNC1	85.7478	0.490252	0.19784	-2.47803	0.0132111	0.206043
VPS37C	323.329	0.369593	0.149137	-2.47821	0.0132045	0.206043
PHLDB3	163.075	0.446915	0.180395	-2.47743	0.0132334	0.206145
CCDC28B	68.3702	0.428463	0.173024	-2.47632	0.0132744	0.206295
HEG1	2964.98	0.57817	0.233444	-2.4767	0.0132603	0.206295
RHOBTB3	2628.37	-0.253522	0.102404	2.47571	0.0132971	0.206404
TMEM19	295.162	-0.291453	0.11777	2.47476	0.0133326	0.20671
METRNL	842.243	0.373117	0.150884	-2.47287	0.0134032	0.20756
ATP5G2	916.259	0.211697	0.0856771	-2.47087	0.0134784	0.207615
B4GAT1	537.391	0.398365	0.161178	-2.47158	0.0134516	0.207615
NMB	289.192	0.591032	0.239219	-2.47068	0.0134858	0.207615
RAB27B	1402.52	0.586157	0.237219	-2.47095	0.0134754	0.207615
THSD1	118.711	-0.456575	0.184766	2.47109	0.0134701	0.207615
GPD1L	149.225	-0.37743	0.152888	2.46867	0.0135616	0.208363
SNX30	471.111	-0.354148	0.143464	2.46855	0.0135661	0.208363
RPL19P12	150.647	0.403536	0.163503	-2.46807	0.0135846	0.208402
MAP2	229.039	-0.495068	0.20074	2.46622	0.0136548	0.209236
CSF1	2787.78	0.415578	0.168558	-2.4655	0.0136824	0.209414
CDKN2B-AS1	56.3279	-0.554686	0.225045	2.46478	0.0137096	0.209587
PDE5A	691.153	-0.556963	0.226012	2.46431	0.0137277	0.209619
CHI3L1	211328	0.55485	0.225193	-2.46389	0.0137439	0.209622
ABCB6	415.458	0.316964	0.128788	-2.46113	0.0138501	0.210752
FAM225B	75.0057	-0.429936	0.174686	2.4612	0.0138474	0.210752
ASS1	979.113	0.560069	0.227893	-2.4576	0.0139869	0.211608
KIF9-AS1	29.7144	-0.518592	0.210887	2.4591	0.0139288	0.211608
OXCT1	505.688	-0.3865	0.157237	2.45808	0.0139683	0.211608
PYROXD1	461.618	-0.255192	0.103825	2.45791	0.0139747	0.211608
RASL11A	92.8447	-0.518128	0.210808	2.45782	0.0139783	0.211608
EFTUD2	678.627	0.306371	0.124736	-2.45616	0.014043	0.212047
SLC25A42	133.603	0.308467	0.125596	-2.45603	0.0140482	0.212047
TOP1MT	218.084	0.272424	0.110945	-2.45548	0.0140698	0.21213
C21orf2	302.668	0.260374	0.106076	-2.4546	0.0141043	0.212143
GMPR2	388.741	0.217758	0.0887873	-2.45257	0.0141838	0.212143
LOC101927583	15.4384	0.614816	0.250654	-2.45285	0.0141731	0.212143
NINJ2	35.328	-0.533982	0.217604	2.45392	0.0141307	0.212143
ROCK1	1275.99	-0.249368	0.101658	2.45301	0.0141666	0.212143
SESN1	268.599	-0.369989	0.15081	2.45334	0.0141538	0.212143
VIMP	549.461	0.209675	0.0854438	-2.45395	0.0141297	0.212143
ABHD2	2963.44	-0.418562	0.170805	2.45053	0.0142646	0.212175
AGRN	2180.67	0.381066	0.155534	-2.45005	0.0142835	0.212175
ATG16L2	247.973	0.448437	0.183061	-2.44966	0.014299	0.212175
COL9A2	15.8239	-0.605506	0.247112	2.45033	0.0142727	0.212175
DLAT	352.557	0.361247	0.147367	-2.45134	0.0142325	0.212175
PARP4	1170.73	-0.157692	0.0643255	2.45147	0.0142276	0.212175
ZNF436-AS1	44.2261	-0.521354	0.212718	2.45092	0.0142492	0.212175
CHST12	304.505	0.271215	0.110763	-2.44862	0.0143406	0.212314
FAM109A	226.375	-0.296101	0.120946	2.44821	0.0143569	0.212314
PGAM4	60.5188	0.488674	0.199591	-2.44838	0.0143499	0.212314
COL24A1	109.026	0.529846	0.216621	-2.44596	0.0144467	0.213162
PHKB	898.217	-0.196669	0.0803934	2.44633	0.0144319	0.213162
KIRREL	4121.81	0.289366	0.118396	-2.44405	0.0145234	0.213574
PPAP2A	591.38	0.494143	0.202122	-2.44478	0.014494	0.213574
TMEM205	182.073	0.306321	0.125333	-2.44406	0.0145229	0.213574
ITGB4	14.3185	0.611709	0.250347	-2.44345	0.0145477	0.213691
TGFBI	15827.5	0.376849	0.154357	-2.44141	0.0146299	0.214658
CBR4	135.653	-0.339472	0.139075	2.44093	0.0146494	0.214705
LARP6	595.833	-0.335385	0.13743	2.44041	0.0146707	0.214777
CAMK2D	1806.65	-0.371943	0.152548	2.43821	0.0147603	0.215815
CSRP1	2040.34	-0.277029	0.113636	2.43786	0.0147744	0.215815
EGLN1	651.343	0.329431	0.135214	-2.43637	0.0148355	0.216412
STARD9	221.802	-0.487431	0.20009	2.43606	0.0148482	0.216412
JADE1	345.934	-0.420335	0.172682	2.43415	0.0149268	0.216595
MGC32805	16.1861	0.536976	0.220546	-2.43476	0.0149018	0.216595
PTGS2	3557.54	0.553142	0.227234	-2.43424	0.014923	0.216595
ST8SIA4	251.995	-0.539528	0.221583	2.43488	0.0148967	0.216595
CNNM4	156.38	0.319511	0.13142	-2.43122	0.015048	0.217498
HSPB6	790.045	-0.609313	0.250661	2.43083	0.0150645	0.217498
MCTP1	19.6501	0.5916	0.243289	-2.43168	0.0150289	0.217498
PIGZ	46.7383	0.433192	0.178165	-2.43141	0.0150404	0.217498
SCYL2	525.482	-0.209847	0.0863338	2.43065	0.0150719	0.217498
CCP110	255.298	-0.293784	0.120909	2.4298	0.0151071	0.217768
IL15RA	16.6649	0.590641	0.243367	-2.42696	0.0152261	0.219078
RAB3IL1	204.96	-0.562375	0.231846	2.42564	0.0152814	0.219078
SLC4A7	1285.2	-0.323273	0.133238	2.42628	0.0152545	0.219078
SRP14	1901.79	-0.161474	0.0665636	2.42585	0.0152724	0.219078
YWHAZ	3929.56	-0.152739	0.0629596	2.42598	0.015267	0.219078
IGFBP4	38269.5	0.604936	0.249451	-2.42507	0.0153055	0.219184
HTRA1	12191.1	-0.359033	0.148288	2.42119	0.0154696	0.221293
TAF11	178.062	-0.281215	0.116181	2.42048	0.0154998	0.221484
PALM	89.4871	-0.525833	0.217282	2.42004	0.0155186	0.221511
FANCE	63.6782	0.418901	0.173401	-2.4158	0.0157009	0.223627
PDZD11	252.818	-0.346308	0.143349	2.41584	0.0156988	0.223627
B3GALNT1	362.818	-0.38069	0.157682	2.4143	0.0157657	0.224306
PREX1	1284.53	0.341797	0.141628	-2.41335	0.0158067	0.224647
GSDMD	602.182	0.21001	0.0870572	-2.41232	0.0158514	0.225038
GNB5	316.793	-0.304762	0.126416	2.41079	0.015918	0.22574
PITPNM1	607.758	0.275486	0.114294	-2.41034	0.0159378	0.225777
LMAN1	3050.92	0.253778	0.105431	-2.40706	0.0160817	0.22757
C14orf28	81.4604	-0.378059	0.15736	2.40251	0.0162832	0.230173
CBR1	625.514	-0.249206	0.103825	2.40024	0.0163842	0.231352
PKM	20589.9	0.369495	0.154011	-2.39915	0.0164331	0.231794
SECISBP2	392.944	0.265475	0.110712	-2.3979	0.0164893	0.232337
GNPDA1	470.76	-0.373059	0.155732	2.39552	0.016597	0.233353
UBE2A	721.316	-0.183541	0.0766062	2.39591	0.0165794	0.233353
TMEM132B	612.223	-0.59778	0.249861	2.39245	0.0167365	0.235062
NUCB1	4772.39	0.232104	0.0970827	-2.39078	0.0168126	0.235627
RASA1	1254.04	-0.206132	0.0862174	2.39084	0.0168098	0.235627
RUNDC1	182.818	-0.351017	0.146888	2.38969	0.0168626	0.236076
NUP43	283.969	-0.255364	0.106913	2.38851	0.0169167	0.236581
MRPL23	221.491	0.332366	0.139213	-2.38746	0.0169652	0.236756
UBE2E4P	131.602	-0.40504	0.169641	2.38763	0.0169573	0.236756
RNF44	353.539	0.307673	0.129001	-2.38504	0.0170773	0.238068
DYNC1I2	935.801	-0.237151	0.0994611	2.38436	0.0171088	0.238253
VCAM1	9295.51	0.523998	0.219805	-2.38392	0.0171293	0.238287
ATP5G1	270.938	0.279414	0.117504	-2.37791	0.017411	0.241693
BTG2	1271.26	0.468662	0.197059	-2.37828	0.0173936	0.241693
CCM2	454.347	-0.228504	0.0961421	2.37673	0.017467	0.242214
ATF5	239.714	0.36062	0.151948	-2.37331	0.0176294	0.244049
KCNS1	22.2372	-0.591084	0.249111	2.37277	0.0176551	0.244049
ZNF106	1433.45	-0.346155	0.14588	2.37287	0.0176503	0.244049
RNF11	1570.28	-0.269443	0.113606	2.37173	0.0177051	0.244069
SMC5	571.118	-0.215111	0.0906763	2.37229	0.0176781	0.244069
WASF2	1940.23	-0.232687	0.0981146	2.37158	0.0177123	0.244069
NTHL1	102.84	0.445587	0.187938	-2.37093	0.0177433	0.24424
CDK19	416.424	-0.26763	0.112993	2.36854	0.0178582	0.245368
FURIN	1431.68	0.224834	0.0949286	-2.36845	0.0178626	0.245368
IKBIP	852.638	0.255777	0.108018	-2.3679	0.0178892	0.245477
DDR2	2007.79	0.234818	0.0991966	-2.3672	0.0179234	0.245689
CPM	126.665	0.437205	0.184728	-2.36676	0.0179448	0.245726
SSH1	2118.16	-0.259019	0.109506	2.36534	0.0180133	0.24615
UBE2M	509.069	0.276561	0.116906	-2.36566	0.017998	0.24615
SLC25A32	406.683	-0.213994	0.0904918	2.36479	0.0180401	0.246261
NIPBL-AS1	132.599	-0.293168	0.124137	2.36164	0.0181943	0.248107
TAB2	1390.73	0.298351	0.126507	-2.35837	0.0183552	0.250043
VAMP3	1251.53	-0.172305	0.0731026	2.35703	0.0184219	0.25069
SLC7A8	1380.57	-0.301101	0.127923	2.35377	0.0185839	0.252634
FAM162A	329.748	0.375456	0.159566	-2.35298	0.0186237	0.252652
H1F0	2027.41	0.222037	0.09435	-2.35333	0.0186061	0.252652
ERN1	143.136	0.509074	0.216526	-2.3511	0.018718	0.253406
WLS	2703.09	0.245938	0.104594	-2.35136	0.018705	0.253406
GLUD2	237.248	-0.333551	0.142043	2.34825	0.0188621	0.254
GRIPAP1	403.147	0.283363	0.120672	-2.34821	0.0188641	0.254
NUDT21	885.571	-0.205376	0.0874358	2.34888	0.0188301	0.254
SEMA3A	115.338	-0.488735	0.208189	2.34755	0.0188972	0.254
SLC25A5	1203.81	0.291536	0.124183	-2.34762	0.0188937	0.254
TMEM59	2208.59	0.290929	0.123864	-2.34877	0.0188355	0.254
UST	429.98	0.392143	0.166893	-2.34967	0.0187899	0.254
FAM13B	554.055	-0.250098	0.106609	2.34593	0.0189795	0.254305
INO80C	132.472	0.373522	0.159205	-2.34617	0.0189677	0.254305
NLGN2	1191.19	0.205018	0.087366	-2.34665	0.0189428	0.254305
TSSC4	275.668	0.248823	0.106082	-2.34558	0.0189973	0.254305
FAU	1594.4	0.17553	0.0748641	-2.34465	0.0190452	0.254686
UNC93B1	244.65	0.312358	0.133323	-2.34287	0.0191363	0.255644
CUL4A	889.96	-0.195607	0.083505	2.34246	0.0191573	0.255664
OSBPL6	102.642	-0.471436	0.201294	2.34203	0.019179	0.255695
ABHD12	399.765	0.229842	0.0981939	-2.3407	0.0192476	0.255974
CSTA	31.7969	0.584973	0.249936	-2.34049	0.0192585	0.255974
GBGT1	21.926	0.563771	0.240805	-2.3412	0.019222	0.255974
NRDE2	168.954	0.291241	0.124473	-2.33979	0.0192945	0.256194
PURB	1013.49	-0.213211	0.0911466	2.33921	0.0193248	0.256337
PPP1R32	34.8873	-0.504019	0.215522	2.33859	0.0193565	0.256498
BOC	1472.47	0.557166	0.238294	-2.33815	0.0193795	0.256544
PHPT1	939.461	0.273516	0.11706	-2.33654	0.019463	0.257217
TNKS1BP1	2200.16	0.250871	0.107374	-2.33642	0.0194696	0.257217
EMP1	7490.91	-0.389305	0.166657	2.33596	0.0194931	0.25727
CD276	3091.42	-0.286421	0.122714	2.33406	0.0195924	0.258321
IFIT1	113.327	-0.555529	0.23846	2.32965	0.0198244	0.261117
ASL	249.401	0.343148	0.147375	-2.32839	0.0198912	0.261279
DIP2B	522.983	-0.202826	0.0871133	2.3283	0.0198964	0.261279
ZNF414	119.949	0.323479	0.138932	-2.32832	0.0198951	0.261279
CDKL1	34.1912	-0.499424	0.214549	2.32778	0.0199236	0.261375
KANK1	401.513	-0.416315	0.178953	2.32639	0.0199975	0.262084
FAM65C	201.962	0.572204	0.24617	-2.32442	0.0201029	0.263202
AK5	266.596	-0.573246	0.24667	2.32394	0.0201286	0.263276
INPP5A	212.835	-0.318512	0.137138	2.32256	0.020203	0.263986
SPIN1	1485.01	-0.148775	0.0641038	2.32085	0.0202949	0.264923
SLC38A5	159.653	0.53446	0.230436	-2.31934	0.0203767	0.265463
THUMPD1	443.345	-0.254025	0.109517	2.31951	0.0203674	0.265463
SLC25A46	568.643	-0.215242	0.0928292	2.31868	0.0204122	0.265662
GBE1	1385.39	0.338188	0.146167	-2.31372	0.0206831	0.268389
KLHL21	1121.24	-0.320249	0.138405	2.31386	0.0206757	0.268389
TUBB3	1367.62	-0.301035	0.13009	2.31406	0.0206645	0.268389
PDGFRB	9859.86	-0.310321	0.134156	2.31313	0.0207153	0.268542
MGAT5B	24.8356	0.520151	0.224967	-2.31212	0.0207709	0.268998
APBB2	720.341	-0.325458	0.140933	2.3093	0.0209269	0.270751
ANXA4	802.372	-0.396509	0.171787	2.30814	0.0209916	0.27132
TFDP2	577.602	-0.223555	0.0969557	2.30574	0.0211251	0.272778
LOC154761	17.5574	0.57774	0.250741	-2.30413	0.0212155	0.273676
ISOC2	345.811	0.291792	0.126672	-2.30352	0.0212497	0.273848
SNAPC1	374.626	0.318505	0.138329	-2.30252	0.021306	0.273902
SUV420H2	51.0342	0.458548	0.199167	-2.30233	0.0213165	0.273902
TTYH3	3519.92	0.351872	0.152832	-2.30234	0.0213157	0.273902
AZI2	675.481	0.312115	0.135622	-2.30135	0.0213719	0.274098
NDUFA1	322.633	0.298705	0.129818	-2.30095	0.0213943	0.274098
STARD13	417.73	0.433097	0.188198	-2.30129	0.0213755	0.274098
LMO4	753.385	0.277705	0.120757	-2.29971	0.0214647	0.274731
CXCL12	12466.8	0.521105	0.226719	-2.29846	0.0215354	0.275367
SCARF1	44.8989	0.481217	0.209446	-2.29757	0.0215861	0.275748
ETV5	674.418	-0.301666	0.131371	2.29629	0.0216594	0.276146
KCNJ15	279.332	0.53084	0.231143	-2.29659	0.0216424	0.276146
FAM160B1	609.422	-0.278386	0.121275	2.29549	0.0217048	0.276317
FAM98C	122.619	-0.3183	0.138729	2.2944	0.0217673	0.276317
PLXDC1	351.08	-0.572069	0.249291	2.29478	0.0217457	0.276317
RASL10B	77.8571	0.493833	0.215251	-2.29422	0.0217779	0.276317
TTL	674.942	-0.339103	0.14778	2.29465	0.0217531	0.276317
FICD	92.3952	0.430055	0.187551	-2.293	0.0218483	0.276408
NUAK1	272.553	-0.401624	0.175142	2.29313	0.0218406	0.276408
PTS	196.73	0.357988	0.156086	-2.29353	0.0218176	0.276408
CDK14	733.533	-0.313331	0.136752	2.29123	0.0219501	0.276519
EIF2B1	442.037	-0.207504	0.0905337	2.29201	0.0219049	0.276519
FUS	2329.02	0.184148	0.0803773	-2.29104	0.021961	0.276519
LINC00657	5670.2	-0.128976	0.0562965	2.29102	0.0219623	0.276519
LOC100506321	75.6325	-0.363307	0.158543	2.29153	0.0219328	0.276519
COL8A1	5380.76	0.460656	0.2012	-2.28954	0.0220478	0.277329
PDP1	442.212	-0.422034	0.184379	2.28895	0.0220822	0.277496
HOOK2	221.202	0.290283	0.126972	-2.28621	0.0222422	0.279239
LINC00987	82.8249	0.383527	0.1678	-2.28562	0.0222764	0.279402
LRP6	753.065	-0.17844	0.0781814	2.28238	0.0224669	0.281332
NAB2	777.908	-0.396427	0.173698	2.28227	0.0224732	0.281332
LOC646762	105.247	0.312679	0.13703	-2.28183	0.0224997	0.281396
PSMA6	484.204	0.192953	0.0845842	-2.28119	0.0225371	0.281595
SPOCD1	662.45	-0.414327	0.181727	2.27994	0.0226112	0.282253
NKD2	204.16	-0.558814	0.245277	2.2783	0.0227088	0.282933
TNFRSF1B	214.46	0.38691	0.169797	-2.27866	0.0226874	0.282933
SLC5A6	302.508	0.392593	0.172374	-2.27757	0.0227521	0.283205
GADD45A	1149.98	-0.4144	0.181982	2.27715	0.0227771	0.283247
CFLAR-AS1	71.708	0.505542	0.222133	-2.27585	0.022855	0.283679
TET1	51.756	-0.487382	0.214141	2.27599	0.0228466	0.283679
ANK2	442.833	-0.405968	0.178474	2.27466	0.0229263	0.284027
TMEM259	1639.42	0.203445	0.0894389	-2.27468	0.0229253	0.284027
EIF4A2	2925.73	-0.228675	0.100564	2.27393	0.0229703	0.284303
LINC00950	22.9843	-0.520304	0.229092	2.27115	0.0231376	0.284764
LOC101927780	16.7323	0.520338	0.228938	-2.27283	0.0230362	0.284764
NUTF2	557.518	-0.211655	0.0931506	2.27218	0.0230755	0.284764
PKNOX2	49.8763	0.544379	0.239588	-2.27214	0.023078	0.284764
STX3	201.273	-0.351921	0.15494	2.27135	0.0231261	0.284764
TMCO3	1863.15	0.207233	0.0912227	-2.27172	0.0231034	0.284764
KIF18A	23.6801	0.540591	0.238212	-2.26937	0.0232461	0.285831
MAN1A1	1942.38	0.276735	0.121968	-2.26891	0.0232738	0.285905
SLC4A2	1327.49	0.226176	0.0997216	-2.26808	0.0233245	0.28626
RPS7	1048.28	0.213341	0.0941247	-2.26658	0.023416	0.287114
LOC100507053	67.6822	-0.424277	0.187251	2.26582	0.0234626	0.287417
H19	16.5998	-0.526062	0.232408	2.26353	0.0236033	0.28887
CAMK2N1	1362.13	-0.459276	0.202962	2.26286	0.0236442	0.289033
GAS6	16445	0.31658	0.139919	-2.2626	0.0236605	0.289033
VCL	5568.06	-0.292749	0.129445	2.26158	0.0237233	0.289414
ZNF416	43.3123	-0.454902	0.201161	2.26138	0.0237359	0.289414
CREB5	120.672	-0.558355	0.247059	2.26001	0.0238208	0.289643
FBLN1	18370.3	0.426294	0.188619	-2.26008	0.0238161	0.289643
GPR137	464.687	0.212322	0.0939472	-2.26002	0.0238202	0.289643
C11orf96	1697.11	0.546897	0.242034	-2.25959	0.0238466	0.289689
C1QTNF9B	22.2174	-0.565765	0.250728	2.25649	0.02404	0.290374
COX8A	542.813	0.265995	0.117833	-2.25739	0.0239837	0.290374
CYP27A1	590.522	0.465835	0.206317	-2.25786	0.0239546	0.290374
DLX6	44.9887	-0.507476	0.224924	2.25621	0.0240578	0.290374
RUFY3	459.305	-0.261126	0.115655	2.2578	0.0239579	0.290374
TNS3	1537.57	0.344801	0.152781	-2.25683	0.0240188	0.290374
ZFYVE21	396.424	-0.327006	0.144905	2.2567	0.024027	0.290374
CPPED1	352.931	-0.232698	0.103193	2.25497	0.0241352	0.290841
TCIRG1	880.548	0.252656	0.112048	-2.25488	0.0241408	0.290841
RPS18P9	212.134	0.348899	0.154927	-2.25203	0.0243207	0.29274
C10orf54	351.093	0.557994	0.247886	-2.25101	0.0243848	0.293243
MYDGF	1448.52	0.379177	0.16848	-2.25058	0.0244123	0.293305
CYBA	863.213	0.33373	0.148314	-2.25016	0.0244389	0.293356
DNAJC27	95.4951	0.343969	0.152945	-2.24897	0.0245144	0.293994
GRAMD1C	52.2673	-0.45691	0.203277	2.24772	0.0245938	0.294408
SOX4	2111.77	-0.284598	0.126608	2.24787	0.0245846	0.294408
FBLN7	373.086	-0.54212	0.241389	2.24584	0.0247145	0.294671
FKBP2	511.698	0.376597	0.167695	-2.24572	0.0247218	0.294671
HEXB	2914.8	0.438098	0.195089	-2.24563	0.024728	0.294671
KIAA1644	1818.98	-0.460303	0.204967	2.24575	0.0247202	0.294671
RAI14	1447.13	-0.279316	0.124346	2.24628	0.0246864	0.294671
CAP1	2966.99	-0.194789	0.0867743	2.24478	0.0247824	0.295052
PSMC4	588.794	0.203673	0.0907884	-2.24338	0.0248723	0.295854
ARPP19	1037.11	-0.239964	0.107009	2.24247	0.0249307	0.296013
PTHLH	60.3927	-0.522949	0.233165	2.24282	0.0249082	0.296013
FAM65B	42.3334	0.5409	0.241247	-2.2421	0.0249547	0.29603
LOC730183	28.7148	0.506468	0.226203	-2.239	0.025156	0.298007
ZNF549	94.5069	-0.337581	0.150784	2.23883	0.0251667	0.298007
TMEM217	37.9208	0.518251	0.23164	-2.23731	0.0252662	0.298915
ADD1	2636.49	-0.203006	0.090945	2.23218	0.0256031	0.299262
ANAPC7	346.837	-0.253356	0.113358	2.23501	0.0254169	0.299262
BIN1	566.211	0.313343	0.140277	-2.23374	0.0255003	0.299262
CA5B	154.318	-0.334116	0.149421	2.23606	0.0253477	0.299262
CCDC9	278.418	0.256073	0.114603	-2.23443	0.0254549	0.299262
FAM168B	1854.82	-0.143574	0.0642625	2.23419	0.0254708	0.299262
HILPDA	102.546	0.506865	0.226809	-2.23477	0.0254325	0.299262
HOXB7	116.566	-0.33004	0.147781	2.2333	0.025529	0.299262
PIGS	683.314	0.282415	0.126336	-2.23542	0.0253896	0.299262
REL	204.796	0.444039	0.198942	-2.23201	0.0256145	0.299262
TPRG1L	624.708	-0.2644	0.118438	2.23239	0.0255891	0.299262
TRIB2	1462.19	-0.414633	0.185558	2.23452	0.0254491	0.299262
UBLCP1	388.714	-0.247579	0.110916	2.23213	0.0256063	0.299262
WDR54	142.33	0.295278	0.132275	-2.2323	0.0255949	0.299262
BCL9L	1614.68	0.258642	0.115902	-2.23156	0.025644	0.299284
CCT3	1516.1	0.176023	0.0788972	-2.23104	0.0256787	0.299284
MOV10	537.883	0.306805	0.137522	-2.23094	0.0256848	0.299284
FEZ2	495.45	-0.2028	0.0909404	2.23003	0.0257454	0.299459
NAT14	284.942	0.263603	0.118195	-2.23025	0.0257311	0.299459
HSD11B1	309.71	0.441637	0.198117	-2.22918	0.0258022	0.299589
KIDINS220	1634.55	-0.227953	0.102259	2.22919	0.0258014	0.299589
TACC1	1663.93	-0.206894	0.0928395	2.22851	0.0258466	0.299838
ADH5	1247.7	-0.25624	0.11508	2.22662	0.0259729	0.300773
KIAA0430	995.903	-0.17642	0.0792271	2.22676	0.0259634	0.300773
LOC286437	65.814	-0.381334	0.17133	2.22573	0.0260322	0.301194
SIKE1	371.887	-0.275098	0.123701	2.22389	0.0261561	0.30236
LACC1	1282.21	0.463059	0.20831	-2.22293	0.0262205	0.30279
NRD1	1343.41	0.192893	0.0867945	-2.22241	0.0262554	0.30279
RIOK3	567.415	-0.192652	0.0866982	2.22209	0.0262769	0.30279
SERTAD4	221.111	-0.531152	0.239046	2.22197	0.0262855	0.30279
BACE2	996.544	0.453449	0.204113	-2.22156	0.026313	0.302841
DHX30	800.679	0.158952	0.0715865	-2.22041	0.0263908	0.303471
CTDSPL	490.54	-0.361538	0.162901	2.21937	0.0264617	0.30402
KLF13	1548.94	-0.3295	0.148536	2.21833	0.0265327	0.304569
FAM117A	157.359	-0.46349	0.20902	2.21744	0.026593	0.304787
SCFD2	270.215	-0.330601	0.149096	2.21737	0.0265981	0.304787
PPP1R26	171.008	0.346948	0.156593	-2.2156	0.0267188	0.305903
CCDC12	176.746	0.267722	0.12088	-2.21478	0.0267753	0.306283
MBD2	579.809	0.21871	0.0987876	-2.21395	0.0268324	0.306555
MOB3C	224.906	0.295123	0.133313	-2.21375	0.0268458	0.306555
CAPRIN1	2918.74	-0.207287	0.0937606	2.21081	0.0270487	0.30664
CLSTN3	548.584	0.419312	0.189502	-2.21271	0.0269179	0.30664
DACT3	68.1319	-0.486999	0.22007	2.21293	0.0269022	0.30664
GCLC	188.933	-0.29762	0.134706	2.20941	0.0271462	0.30664
H1FX	1331.67	0.217665	0.098502	-2.20975	0.0271222	0.30664
HOXA10	616.846	-0.391463	0.17702	2.2114	0.027008	0.30664
KIAA0513	340.326	-0.33536	0.151784	2.20945	0.0271434	0.30664
KPNA4	975.112	-0.181273	0.0820516	2.20926	0.0271567	0.30664
RCOR3	455.881	-0.206068	0.0932078	2.21084	0.0270468	0.30664
RPS16	4494	0.167477	0.0757423	-2.21114	0.027026	0.30664
RTN2	120.598	-0.338326	0.153107	2.20974	0.0271231	0.30664
SZT2	973.607	0.205704	0.0930731	-2.21013	0.0270962	0.30664
WBP1L	1246.27	0.195186	0.0882491	-2.21176	0.0269831	0.30664
ELP4	94.715	-0.371705	0.168308	2.20848	0.0272108	0.306986
ATP9A	1432.35	-0.359144	0.162652	2.20805	0.0272406	0.307058
ABHD5	421.441	0.459913	0.208338	-2.20753	0.0272769	0.307204
ERBB2IP	1079.75	-0.262024	0.118849	2.20467	0.0274771	0.309194
MAP3K10	221.62	0.25734	0.116806	-2.20314	0.0275848	0.31014
CAB39L	131.488	-0.298059	0.135366	2.20188	0.0276738	0.310875
NDUFB9	452.234	0.235501	0.106981	-2.20133	0.0277123	0.311041
AK3	1225.68	0.272986	0.124207	-2.19784	0.0279606	0.313025
ATHL1	311.386	0.33106	0.150629	-2.19785	0.0279597	0.313025
SIRPB1	28.9524	0.528189	0.24032	-2.19785	0.0279595	0.313025
C20orf194	435.292	-0.212989	0.0969403	2.19712	0.0280121	0.313335
MAP7D3	205.25	-0.299535	0.136414	2.19578	0.0281074	0.313866
SDF4	3940.51	0.36183	0.164772	-2.19594	0.0280966	0.313866
AUP1	839.333	0.169604	0.0773233	-2.19344	0.0282755	0.31494
PBX1	415.915	-0.345016	0.15726	2.19391	0.0282416	0.31494
SURF4	4747.83	0.256456	0.116908	-2.19365	0.0282606	0.31494
SCLT1	85.4936	-0.400018	0.182496	2.19193	0.0283845	0.315886
NOL3	199.155	0.278539	0.127145	-2.19072	0.0284722	0.316594
ARPIN	331.442	-0.28001	0.127846	2.19022	0.0285086	0.31673
ENPP1	2440.03	-0.548584	0.250732	2.18793	0.0286746	0.317312
MPDU1	332.492	0.216116	0.0987808	-2.18783	0.0286818	0.317312
PKIG	1383.08	-0.376191	0.171942	2.18789	0.0286774	0.317312
TRAK2	898.113	-0.218052	0.0996353	2.1885	0.0286331	0.317312
TRIM47	352.678	0.270539	0.123618	-2.18852	0.0286318	0.317312
FAM91A1	723.157	-0.201489	0.0921315	2.18697	0.0287447	0.31774
ACTR1A	1161.72	-0.221635	0.101399	2.18576	0.0288333	0.318184
SLK	974.996	-0.286683	0.131149	2.18594	0.0288201	0.318184
YWHAH	673.969	-0.31358	0.143543	2.18458	0.0289196	0.318869
QPCT	149.323	0.51057	0.233759	-2.18418	0.0289493	0.318928
SLC6A9	352.757	0.53699	0.24596	-2.18325	0.0290177	0.319414
LOC100128770	20.8317	0.478315	0.219163	-2.18247	0.029075	0.319509
RCBTB2	250.062	-0.309749	0.14192	2.18256	0.0290683	0.319509
IFNGR2	1002.57	0.243269	0.111488	-2.18202	0.0291079	0.319603
MAP3K8	116.375	0.543324	0.249045	-2.18163	0.0291369	0.319654
POLM	218.175	-0.298395	0.136858	2.18031	0.0292342	0.320453
NOMO2	563.345	0.383433	0.175927	-2.1795	0.0292945	0.320579
PFKP	779.579	0.348892	0.160067	-2.17967	0.0292823	0.320579
C2orf76	72.4167	-0.387755	0.177943	2.17909	0.0293248	0.320644
AK1	1176.41	-0.227953	0.104661	2.17802	0.0294048	0.321251
FAM195A	95.9758	0.462615	0.212478	-2.17724	0.0294626	0.321428
PTGER2	158.356	-0.47968	0.220325	2.17714	0.02947	0.321428
CHPF2	1934.96	0.251238	0.115468	-2.17582	0.0295684	0.322234
THEMIS2	108.793	0.42801	0.196797	-2.17488	0.0296391	0.322737
RPS17	724.378	0.31411	0.144513	-2.17357	0.0297374	0.323361
VSTM4	396.109	-0.325837	0.149929	2.17327	0.0297598	0.323361
ZNF329	119.221	-0.358878	0.165143	2.17313	0.0297703	0.323361
PPM1A	608.603	-0.197307	0.0908355	2.17214	0.029845	0.323649
ZFP1	100.274	-0.383077	0.17636	2.17213	0.0298461	0.323649
ATRX	1441.36	-0.187838	0.0865463	2.17038	0.0299784	0.324053
MMP25-AS1	49.4855	0.517941	0.238552	-2.17119	0.0299169	0.324053
RNFT1	118.668	-0.359821	0.165751	2.17085	0.0299422	0.324053
UGDH	1399.93	-0.182691	0.0841765	2.17033	0.0299821	0.324053
CYS1	51.3855	-0.542727	0.250194	2.16922	0.0300659	0.324692
THRA	563.928	-0.228908	0.10559	2.16789	0.0301667	0.325513
GPR146	17.6083	0.530248	0.244972	-2.16452	0.0304245	0.328025
FBXW9	108.056	-0.337982	0.156246	2.16313	0.0305309	0.328903
FKRP	421.958	0.250042	0.115687	-2.16136	0.0306672	0.329868
SLC18B1	115.794	0.505702	0.233979	-2.16132	0.0306708	0.329868
RTF1	680.947	-0.144228	0.066742	2.16097	0.0306974	0.329884
TRAF7	1120.83	0.198073	0.0916801	-2.16048	0.0307356	0.330025
DDB2	537.529	-0.250157	0.115833	2.15963	0.0308012	0.330189
XPO1	1615.73	-0.197856	0.0916127	2.1597	0.030796	0.330189
P4HA2-AS1	123.993	0.448692	0.207802	-2.15923	0.0308322	0.330252
ZNF557	111.795	-0.31559	0.146189	2.15878	0.030867	0.330355
CPNE3	1180.75	-0.166722	0.0772841	2.15726	0.0309857	0.331355
APPL1	608.774	-0.30048	0.139341	2.15644	0.0310494	0.331766
SETD4	170.367	-0.264067	0.122501	2.15563	0.0311125	0.33217
AP5Z1	459.274	-0.198425	0.0920964	2.15454	0.0311978	0.332177
ATG2A	413.368	0.241567	0.112111	-2.15472	0.031184	0.332177
ATP11C	553.754	0.169266	0.07857	-2.15433	0.0312143	0.332177
CARHSP1	451.046	-0.300352	0.139381	2.15489	0.0311703	0.332177
C16orf58	881.023	0.199021	0.0925759	-2.14982	0.0315698	0.332859
C7orf60	322.28	0.268274	0.124699	-2.15138	0.0314465	0.332859
CCDC6	684.636	-0.24152	0.112176	2.15304	0.0313156	0.332859
CTPS2	138.766	-0.324625	0.150987	2.15002	0.031554	0.332859
FBXW7	248.04	-0.250296	0.116361	2.15103	0.0314736	0.332859
FKBP11	318.284	0.452404	0.21041	-2.1501	0.031547	0.332859
FLJ44635	145.173	0.320074	0.148847	-2.15035	0.0315276	0.332859
IGF2R	4473.7	0.355446	0.165214	-2.15143	0.0314424	0.332859
RECQL	730.781	-0.278403	0.12951	2.14965	0.0315825	0.332859
RNASEH2B	306.561	-0.340616	0.15825	2.15239	0.0313664	0.332859
TMEM41A	147.84	-0.263414	0.122371	2.15257	0.0313522	0.332859
ZNF608	386.58	-0.511586	0.237756	2.15172	0.0314191	0.332859
EFEMP1	5118.58	0.501924	0.233622	-2.14845	0.0316783	0.333193
FKBP4	469.772	0.233912	0.108883	-2.14829	0.0316904	0.333193
RBL2	887.347	-0.175259	0.0815565	2.14893	0.03164	0.333193
ADAMTS6	162.764	0.43635	0.203251	-2.14685	0.0318056	0.334137
ARID5B	1804.65	0.359882	0.167687	-2.14615	0.0318607	0.334341
STX6	490.012	-0.205178	0.0956114	2.14596	0.031876	0.334341
ANKRD28	1483.79	-0.345372	0.161104	2.14379	0.03205	0.335654
APIP	159.155	0.308545	0.143927	-2.14376	0.0320523	0.335654
C17orf96	35.3091	0.491055	0.229307	-2.14148	0.0322356	0.337213
EMC10	1374.28	0.284538	0.132903	-2.14095	0.0322782	0.337213
HMGA1	2750.14	-0.420572	0.19644	2.14097	0.0322763	0.337213
ELN	245.635	-0.503138	0.235158	2.13957	0.0323893	0.338106
KLF7	748.799	-0.224976	0.105199	2.13859	0.0324692	0.338402
PLEKHA5	943.347	0.180402	0.0843524	-2.13867	0.0324622	0.338402
ELOVL3	52.41	0.529988	0.247907	-2.13785	0.0325286	0.338483
GAREML	102.474	0.293664	0.137356	-2.13797	0.0325189	0.338483
CPT1A	950.708	-0.321774	0.150628	2.13622	0.0326611	0.339593
PIGF	461.791	-0.1879	0.088005	2.13511	0.0327521	0.339732
RHBDF1	1041.36	-0.395511	0.185221	2.13534	0.0327329	0.339732
SLC25A1	679.877	0.18385	0.0860977	-2.13536	0.0327315	0.339732
FBXO9	584.957	0.173913	0.081504	-2.1338	0.0328591	0.340539
GAS2L3	42.2584	-0.470238	0.220404	2.13352	0.0328818	0.340539
ACTA2	1606.94	-0.426386	0.199918	2.1328	0.032941	0.34062
TBC1D9	388.723	0.337265	0.158133	-2.1328	0.0329415	0.34062
ACTA2-AS1	723.31	-0.457927	0.214807	2.1318	0.0330231	0.341196
HOXA2	21.6106	-0.5146	0.241468	2.13113	0.0330786	0.341465
POLH	621.057	-0.194401	0.0912314	2.13085	0.0331012	0.341465
MAP1LC3B	1282.82	-0.180354	0.0846612	2.1303	0.0331465	0.341518
TMEM135	225.968	-0.393258	0.184614	2.13016	0.0331583	0.341518
ERP44	633.373	0.21994	0.103312	-2.12889	0.0332634	0.342331
FOXN3	957.212	-0.219587	0.103162	2.12855	0.0332913	0.34235
HIATL2	51.0636	-0.393157	0.184778	2.12773	0.0333599	0.342519
ZNF250	96.138	-0.340547	0.160044	2.12783	0.033351	0.342519
TAF5	77.9399	-0.318478	0.149764	2.12653	0.0334589	0.343268
HLA-B	4925.04	0.496799	0.233758	-2.12527	0.0335643	0.34408
EVA1A	307.334	0.445803	0.2098	-2.12489	0.0335957	0.344133
RBP4	16.7964	0.513494	0.24171	-2.12442	0.0336352	0.344269
HDAC9	108.821	-0.477331	0.224964	2.12181	0.0338539	0.345774
KLHL9	784.674	-0.242562	0.114298	2.1222	0.0338212	0.345774
PLCD4	144.77	-0.278781	0.131394	2.12172	0.0338612	0.345774
COMMD8	129.294	-0.370949	0.174909	2.12081	0.0339381	0.34604
LBH	694.489	-0.51776	0.244172	2.12047	0.0339663	0.34604
WISP3	145.039	0.341635	0.161094	-2.12072	0.0339454	0.34604
HIF1A-AS2	2171.41	0.397175	0.187405	-2.11934	0.0340613	0.346739
LOC100506178	28.689	0.488	0.230315	-2.11884	0.0341039	0.346903
ACTB	42271.4	-0.15804	0.0746669	2.1166	0.0342939	0.347052
ARID3A	132.744	0.365797	0.172806	-2.1168	0.0342769	0.347052
BCKDHB	189.04	-0.322642	0.152738	2.11239	0.034653	0.347052
COL5A1	17391.8	0.353718	0.167476	-2.11206	0.0346814	0.347052
DNAJB4	420.165	-0.275499	0.130332	2.11383	0.0345299	0.347052
DPY19L1	665.511	0.192252	0.0908135	-2.117	0.0342598	0.347052
ESRRA	313.695	0.380868	0.179808	-2.1182	0.0341585	0.347052
GPM6B	52.7136	0.527261	0.24929	-2.11505	0.0344254	0.347052
GTF3C6	232.403	-0.247276	0.117001	2.11344	0.0345628	0.347052
KLHL20	309.058	-0.208403	0.0986266	2.11305	0.0345961	0.347052
LOC101243545	2319.14	0.180113	0.0852393	-2.11302	0.034599	0.347052
MTSS1	439.19	-0.507374	0.240191	2.11238	0.0346542	0.347052
PSME1	757.772	0.241649	0.1141	-2.11786	0.0341869	0.347052
RAB22A	683.978	-0.255251	0.120636	2.11587	0.0343559	0.347052
RAC1	1840.74	-0.250549	0.118622	2.11216	0.0346731	0.347052
SEC61B	633.061	0.214492	0.101476	-2.11373	0.0345387	0.347052
SLC35G1	32.6674	-0.459627	0.217556	2.11269	0.0346277	0.347052
SMIM4	72.3113	0.403012	0.190344	-2.11728	0.0342363	0.347052
STRN	504.628	-0.242249	0.114472	2.11623	0.0343251	0.347052
TLDC1	196.614	-0.328562	0.155532	2.1125	0.0346433	0.347052
TMED5	980.457	0.387636	0.183553	-2.11184	0.0346999	0.347052
VPS35	1010.36	-0.159701	0.075479	2.11583	0.0343589	0.347052
FGL2	15.9547	-0.496571	0.235337	2.11004	0.0348547	0.34737
GANAB	5436.15	0.301601	0.142908	-2.11046	0.0348184	0.34737
NOP14	452.119	0.191054	0.0905121	-2.11081	0.0347883	0.34737
NR1H2	787.913	0.145651	0.0690236	-2.11017	0.034844	0.34737
NTRK2	70.9814	-0.506062	0.239847	2.10993	0.034864	0.34737
ATF7IP	764.395	-0.204109	0.0968535	2.1074	0.0350832	0.348751
PORCN	116.232	0.31847	0.151117	-2.10744	0.0350796	0.348751
RAB12	449.474	-0.228451	0.10842	2.1071	0.0351088	0.348751
REXO2	877.316	-0.286295	0.135812	2.10802	0.0350293	0.348751
ARL4C	1876.35	-0.366693	0.174061	2.1067	0.0351439	0.348836
ACVR1C	34.0394	-0.523648	0.248744	2.10516	0.0352769	0.3489
AIFM2	249.415	0.384547	0.182764	-2.10406	0.0353729	0.3489
AMDHD2	323.5	-0.319632	0.151916	2.10401	0.0353779	0.3489
EDNRB	30.2849	0.440795	0.209365	-2.10539	0.0352576	0.3489
EMX2OS	264.429	-0.362394	0.172074	2.10603	0.0352014	0.3489
GNAI3	964.573	-0.183606	0.087265	2.10401	0.0353778	0.3489
MYBBP1A	573.48	0.242442	0.115242	-2.10376	0.0353995	0.3489
PRDX3	884.669	0.248377	0.118052	-2.10396	0.035382	0.3489
TAF9B	203.241	-0.246677	0.117266	2.10357	0.035416	0.3489
TIMP1	21779.4	0.385685	0.18322	-2.10504	0.035288	0.3489
COL14A1	11605.1	-0.482773	0.229656	2.10216	0.0355393	0.349573
GALNS	722.449	0.293826	0.139813	-2.10157	0.0355909	0.349573
MATN4	40.6591	-0.313688	0.149246	2.10182	0.0355692	0.349573
PRELID1	646.046	0.206287	0.0981265	-2.10226	0.0355309	0.349573
BTBD3	298.733	-0.336457	0.16018	2.10049	0.0356854	0.349717
MED4-AS1	138.334	-0.280562	0.133562	2.10061	0.0356751	0.349717
TMEM126B	281.006	-0.244275	0.11628	2.10075	0.0356628	0.349717
RNGTT	162.902	-0.262348	0.124925	2.10004	0.0357255	0.349849
ST3GAL6	106.727	0.508916	0.24244	-2.09914	0.0358044	0.350099
ZDHHC3	536.401	-0.161416	0.076895	2.09917	0.0358015	0.350099
GRHPR	748.748	0.156523	0.0746076	-2.09794	0.03591	0.35061
PCDHGC5	71.5796	-0.42531	0.202706	2.09816	0.035891	0.35061
PRCC	578.95	0.165209	0.0787772	-2.09716	0.0359791	0.351023
PIGO	298.954	0.291277	0.138987	-2.0957	0.0361084	0.352024
PPP1R12A	1070.65	-0.24537	0.117099	2.0954	0.0361353	0.352024
DNAJB9	531.968	0.334954	0.159884	-2.09498	0.0361724	0.352051
MYNN	239.937	-0.23575	0.112548	2.09467	0.0362007	0.352051
TRIB1	1469.69	0.49421	0.235994	-2.09417	0.0362452	0.352051
TTC37	1422.62	-0.168802	0.0806049	2.09419	0.0362433	0.352051
ANO6	1136.5	-0.17797	0.08502	2.09327	0.0363246	0.352561
ADIPOR1	801.528	0.20413	0.0976345	-2.09076	0.0365494	0.352657
ANO10	517.149	0.259351	0.12402	-2.09119	0.0365106	0.352657
ARL6IP5	2219.93	-0.340319	0.162611	2.09285	0.0363628	0.352657
CD97	629.923	-0.379618	0.181492	2.09165	0.0364695	0.352657
COX10	94.6725	0.348046	0.166469	-2.09076	0.0365492	0.352657
DMKN	67.4931	0.503455	0.240692	-2.09169	0.0364659	0.352657
LOC729603	38.474	0.494406	0.23639	-2.09148	0.0364852	0.352657
RTN4RL1	51.9896	-0.522139	0.249716	2.09093	0.0365344	0.352657
AIDA	365.088	-0.284555	0.136178	2.08959	0.0366546	0.353002
BCAS3	230.323	-0.230754	0.110437	2.08947	0.0366651	0.353002
NFIA	87.5561	-0.332632	0.159218	2.08917	0.0366927	0.353002
TBX2	477.403	-0.386977	0.185221	2.08928	0.0366827	0.353002
SERTAD2	1707.15	-0.309837	0.148363	2.08837	0.0367643	0.353432
GABRE	279.118	0.506317	0.242482	-2.08806	0.0367928	0.353447
PWWP2A	243.748	-0.235646	0.112896	2.08729	0.0368619	0.353853
SPTLC2	597.73	-0.240276	0.115177	2.08615	0.0369647	0.35458
KCTD6	46.3154	-0.379383	0.181956	2.08503	0.037067	0.355302
KLHL5	778.136	0.233584	0.112133	-2.08311	0.0372414	0.356713
KIAA1467	91.2885	0.330672	0.158857	-2.08157	0.0373819	0.357798
ZNF766	120.508	-0.295569	0.14208	2.0803	0.0374976	0.358644
AEBP2	385.04	-0.268019	0.128929	2.07881	0.0376348	0.359694
BZRAP1-AS1	223.625	-0.265478	0.127732	2.0784	0.0376727	0.359795
AMT	134.236	-0.276138	0.132914	2.07757	0.0377488	0.360113
C6orf132	22.2767	0.502916	0.242084	-2.07744	0.0377608	0.360113
ATG4D	119.027	0.346088	0.16667	-2.07649	0.037849	0.36043
C1QTNF3	19.9961	-0.516485	0.248695	2.07678	0.037822	0.36043
EMC7	637.641	0.274545	0.132243	-2.07607	0.0378875	0.360535
SYDE2	57.1359	-0.430516	0.207492	2.07486	0.0379997	0.36108
TBC1D17	691.476	0.20089	0.0968154	-2.07498	0.0379881	0.36108
RFTN1	1268.49	-0.325688	0.157057	2.0737	0.0381076	0.361843
IGSF1	22.7013	-0.474626	0.228939	2.07315	0.0381582	0.362061
CNOT3	474.659	0.206824	0.0998228	-2.07191	0.038274	0.362348
FBXO32	1275.46	-0.345725	0.166858	2.07197	0.0382681	0.362348
PCSK4	29.945	0.447913	0.216132	-2.0724	0.0382279	0.362348
PGF	460.318	0.516951	0.249537	-2.07164	0.0382988	0.362348
MAFK	312.931	0.308721	0.14909	-2.0707	0.038387	0.362921
DDTL	183.542	0.311632	0.150578	-2.06957	0.0384929	0.363661
KCTD3	853.898	-0.207478	0.100268	2.06922	0.0385255	0.363707
C12orf49	315.209	-0.207682	0.100395	2.06865	0.0385789	0.363728
TYK2	785.182	0.2103	0.101662	-2.06861	0.0385831	0.363728
ADAMTSL4-AS1	22.4383	0.514315	0.248866	-2.06664	0.0387684	0.364429
CCDC24	50.9372	0.3843	0.185946	-2.06673	0.03876	0.364429
DGAT2	77.8123	0.504267	0.24398	-2.06684	0.0387491	0.364429
EFHC2	59.6649	0.517128	0.250127	-2.06746	0.0386909	0.364429
RAB40B	83.2716	-0.342306	0.165691	2.06593	0.0388348	0.364759
RBP5	51.2208	0.486076	0.235311	-2.06568	0.0388591	0.364759
SLC25A11	528.075	0.218263	0.105805	-2.06287	0.0391247	0.366728
TMEM14A	214.727	-0.222575	0.107884	2.0631	0.0391035	0.366728
DHRS4	172.315	0.255525	0.12398	-2.06102	0.0393013	0.367076
ENPEP	64.1954	0.509212	0.247078	-2.06094	0.0393091	0.367076
GNL2	504.176	0.179969	0.0873205	-2.06102	0.039301	0.367076
LINC00883	100.437	-0.353921	0.171732	2.06089	0.0393131	0.367076
MEPCE	819.414	0.266792	0.129395	-2.06184	0.0392226	0.367076
ZMIZ2	883.548	0.17852	0.08663	-2.06072	0.0393296	0.367076
LHFP	1524.47	0.30091	0.146045	-2.0604	0.0393606	0.367105
PDZD7	57.5929	-0.418717	0.203305	2.05955	0.039442	0.367602
RBM22	412.693	-0.195875	0.09513	2.05902	0.0394922	0.36781
AGPAT2	313.52	0.209377	0.101728	-2.05821	0.0395696	0.368269
GATAD2B	347.721	-0.220452	0.107197	2.05651	0.039733	0.368563
IL13RA1	1373.61	0.167784	0.0816132	-2.05584	0.0397976	0.368563
KDM1B	194.084	-0.266251	0.129415	2.05734	0.0396533	0.368563
LRPAP1	1569.21	0.371735	0.180712	-2.05705	0.0396812	0.368563
SOD3	1031.77	0.491386	0.238989	-2.0561	0.0397727	0.368563
TRPM7	1033.12	-0.221124	0.107558	2.05585	0.0397971	0.368563
WDR66	15.2267	0.515472	0.250716	-2.056	0.0397828	0.368563
DNM3	22.0324	-0.472375	0.22981	2.0555	0.0398303	0.368606
PDCD6IP	1556.17	-0.16885	0.0821735	2.0548	0.0398982	0.368763
PRSS23	4908.15	-0.506814	0.246655	2.05475	0.0399035	0.368763
COX6B1	691.232	0.21598	0.105165	-2.05373	0.0400015	0.36897
ECHS1	690.008	0.20322	0.0989586	-2.05359	0.0400155	0.36897
GMPPB	227.429	0.237597	0.115717	-2.05326	0.0400476	0.36897
KIAA1841	134.356	-0.295008	0.143692	2.05306	0.0400664	0.36897
ZNF829	58.0452	-0.382955	0.186443	2.05401	0.0399752	0.36897
ATRN	1398.52	0.157877	0.0769669	-2.05123	0.0402449	0.369577
EAF1	575.567	0.338072	0.164858	-2.05069	0.0402976	0.369577
EVC	1139.64	-0.2615	0.127463	2.05157	0.0402114	0.369577
FNBP1L	315.326	-0.241183	0.117646	2.05007	0.0403574	0.369577
LPPR2	725.86	0.278602	0.135866	-2.05057	0.0403092	0.369577
PRKAR2B	97.4986	0.508292	0.247928	-2.05016	0.0403486	0.369577
SH2B2	35.4075	0.447498	0.218186	-2.051	0.0402672	0.369577
ZNF75D	153.752	-0.242397	0.118136	2.05184	0.0401849	0.369577
ZNF443	17.4777	-0.51069	0.249394	2.04772	0.0405872	0.371422
SCARB2	4255.33	0.13972	0.0682613	-2.04684	0.0406734	0.371952
ARHGEF28	302.386	0.435069	0.212633	-2.0461	0.0407466	0.372165
RNF125	17.0709	-0.500171	0.244459	2.04603	0.0407533	0.372165
RPLP0	8710.87	0.166102	0.0812873	-2.0434	0.0410131	0.373653
SKP2	135.678	-0.416523	0.203856	2.04323	0.0410301	0.373653
TXLNA	1363.65	-0.125585	0.0614558	2.04351	0.0410021	0.373653
ZEB1-AS1	40.2492	-0.389837	0.19074	2.04381	0.0409723	0.373653
AGO4	323.006	-0.240045	0.117633	2.04062	0.0412891	0.374712
LRRC61	17.6623	0.51165	0.250712	-2.04079	0.0412722	0.374712
MPP6	506.717	-0.394205	0.193149	2.04094	0.0412566	0.374712
WDR41	315.064	-0.272305	0.133409	2.04112	0.041239	0.374712
ZNF512	342.27	-0.265813	0.130237	2.04099	0.0412516	0.374712
DPP7	1895.42	0.246877	0.121011	-2.04013	0.0413378	0.374828
MYO1F	28.3728	0.507827	0.248945	-2.03991	0.0413589	0.374828
FAM171A2	120.565	-0.477327	0.234164	2.03843	0.0415072	0.375912
RALB	574.758	-0.209227	0.102682	2.03762	0.0415882	0.376386
A2M-AS1	46.1555	-0.499513	0.245302	2.03632	0.0417186	0.3768
NUP107	243.749	-0.201318	0.0988579	2.03644	0.0417062	0.3768
PARD6G	105.25	-0.442226	0.217171	2.0363	0.04172	0.3768
SLC47A1	37.4739	-0.506569	0.248865	2.03552	0.041799	0.377254
ITGBL1	3253.44	-0.402447	0.197752	2.03511	0.0418401	0.377366
UQCR11	623.896	0.164911	0.0810999	-2.03343	0.0420092	0.378631
KATNAL1	376.536	-0.210812	0.103722	2.03247	0.0421065	0.379197
RAVER1	670.344	0.164244	0.0808191	-2.03224	0.0421297	0.379197
ATP6V0A1	485.613	-0.205931	0.101351	2.03185	0.042169	0.37929
RAB7A	3023.06	-0.148693	0.0731971	2.03141	0.0422138	0.379433
NECAB3	155.873	0.342837	0.168823	-2.03075	0.04228	0.379768
ANP32B	990.054	0.199333	0.0982008	-2.02986	0.0423712	0.380068
CHTOP	511.901	0.185221	0.0912459	-2.02991	0.0423655	0.380068
ZYG11B	615.313	-0.173467	0.085471	2.02955	0.0424027	0.38009
FAM214A	299.355	-0.280267	0.138163	2.02853	0.0425061	0.380461
LINC00865	20.3852	0.49304	0.243041	-2.02863	0.0424965	0.380461
YPEL2	222.433	-0.223491	0.110187	2.02829	0.042531	0.380461
LIMA1	3410.23	-0.104527	0.0515566	2.02741	0.0426202	0.380884
OLFML2A	2557.52	-0.320857	0.158272	2.02726	0.0426362	0.380884
SBSN	38.401	0.505722	0.24952	-2.02678	0.042685	0.38106
GPR88	355.398	0.483281	0.238643	-2.02512	0.0428551	0.381586
IMPAD1	1752.14	0.172211	0.0850394	-2.02507	0.0428601	0.381586
NLRC5	409.016	0.329474	0.162682	-2.02527	0.0428398	0.381586
PLEKHA2	577.011	-0.240002	0.118512	2.02513	0.0428536	0.381586
IMPA1	204.724	-0.282075	0.139318	2.02468	0.0428998	0.38168
MAP1B	2709.22	-0.395977	0.19563	2.02411	0.0429583	0.381908
PRDX5	1492.93	0.204761	0.101173	-2.02387	0.0429836	0.381908
LOC100652999	376.975	-0.2537	0.125373	2.02356	0.0430155	0.381934
CAPN2	5589.51	-0.270015	0.133522	2.02225	0.0431504	0.382872
AGAP2-AS1	153.328	0.291953	0.144524	-2.02009	0.0433738	0.38331
C17orf100	23.1335	0.472371	0.233855	-2.01994	0.0433901	0.38331
C5orf24	1230.14	-0.152481	0.0755034	2.01952	0.0434332	0.38331
CD164	3898.36	-0.137786	0.068206	2.02015	0.0433682	0.38331
CNIH3	452.367	-0.503718	0.249406	2.01967	0.0434171	0.38331
GLTPD2	18.1415	0.505273	0.250115	-2.02016	0.0433668	0.38331
MBD6	544.827	0.210416	0.104185	-2.01965	0.04342	0.38331
SLC50A1	214.078	0.219817	0.108756	-2.02119	0.0432601	0.38331
SETDB2	141.794	-0.2983	0.147753	2.01891	0.0434961	0.383607
ABI1	605.56	-0.150841	0.0747308	2.01846	0.0435435	0.383768
NID2	4530.1	0.433197	0.214667	-2.01799	0.0435921	0.383938
LINC00565	53.28	0.407664	0.202143	-2.01671	0.0437257	0.384857
CGNL1	78.9702	0.463776	0.230066	-2.01584	0.0438163	0.385261
RAB27A	322.917	0.319283	0.158397	-2.01571	0.0438303	0.385261
LDOC1L	783.343	-0.152499	0.0756851	2.01492	0.0439132	0.385731
TMEM63B	638.255	0.177085	0.0879118	-2.01434	0.0439734	0.386002
ARHGAP19	109.188	-0.415725	0.206443	2.01375	0.0440363	0.386295
FBXL2	115.17	-0.32003	0.158975	2.01309	0.0441056	0.386645
BPGM	419.347	-0.35796	0.177902	2.01212	0.044207	0.38676
CDC42	1668.78	-0.181993	0.0904415	2.01227	0.0441915	0.38676
FAM53C	1069.13	0.375576	0.186624	-2.01248	0.0441694	0.38676
TP53BP2	461.225	0.179179	0.0890736	-2.01159	0.0442633	0.386771
VPS9D1	374.095	0.199274	0.0990646	-2.01155	0.0442672	0.386771
HSPD1	1541.95	0.266785	0.132676	-2.01081	0.0443458	0.387201
VEZT	606.031	-0.164219	0.0817119	2.00973	0.04446	0.387939
ABAT	60.2401	-0.388407	0.193388	2.00844	0.0445969	0.388037
ACADS	176.839	0.284827	0.141869	-2.00767	0.0446781	0.388037
HABP4	315.37	-0.395306	0.196749	2.00919	0.0445166	0.388037
RAP1GDS1	376.052	-0.290344	0.14458	2.00819	0.0446232	0.388037
TREM1	16.1879	0.456316	0.227195	-2.00848	0.0445922	0.388037
WASF3	634.129	0.34446	0.171493	-2.0086	0.0445801	0.388037
ZBTB7B	429.855	0.260644	0.129822	-2.0077	0.0446754	0.388037
HMOX1	2684.55	-0.337761	0.168274	2.00721	0.0447273	0.388208
HPS5	259.567	-0.190625	0.0950042	2.00649	0.0448036	0.388613
POLR2M	37.7702	0.420863	0.20979	-2.00612	0.0448437	0.388705
SGTB	270.42	-0.326365	0.162878	2.00374	0.0450977	0.390648
NUCKS1	3439.68	-0.157826	0.0788848	2.00072	0.0454231	0.393208
ATP1A1-AS1	1022.42	0.252634	0.126361	-1.99931	0.0455753	0.393746
NXPH3	58.6448	-0.497631	0.248877	1.99951	0.0455537	0.393746
ZNF703	412.763	0.209044	0.104554	-1.99939	0.0455664	0.393746
TMCO4	162.203	0.286215	0.14323	-1.9983	0.0456844	0.39443
C1GALT1C1	272.778	0.330338	0.165419	-1.99698	0.0458278	0.39463
DSCR3	550.391	-0.222182	0.111248	1.99718	0.0458059	0.39463
LINC00641	150.405	0.435272	0.217918	-1.99741	0.0457808	0.39463
LOX	3915.53	0.313467	0.156946	-1.99729	0.0457941	0.39463
PLXNC1	103.102	-0.430908	0.215832	1.99649	0.0458802	0.39465
RSBN1L	170.399	-0.249003	0.124726	1.9964	0.0458902	0.39465
CCDC43	194.504	-0.256258	0.128432	1.99529	0.0460116	0.395177
LPP	2302.75	-0.157378	0.0788677	1.99546	0.0459924	0.395177
FLJ22447	32.3034	0.479779	0.24054	-1.99459	0.046088	0.395315
SEC61G	379.927	0.210654	0.105604	-1.99474	0.0460709	0.395315
SYNE3	141.059	-0.455355	0.228478	1.99299	0.0462623	0.396551
TYSND1	135.09	0.34979	0.175553	-1.9925	0.046316	0.396753
COL5A3	1147.34	-0.416486	0.209094	1.99186	0.0463862	0.396836
H2AFJ	331.388	0.265833	0.133455	-1.99193	0.0463785	0.396836
PSMD5	447.86	-0.2535	0.127357	1.99047	0.0465389	0.397883
ANKMY1	46.9339	0.361919	0.182027	-1.98827	0.0467815	0.399697
CLPTM1	1436.24	0.208125	0.104698	-1.98786	0.0468269	0.399825
NOC4L	139.59	0.245205	0.123375	-1.98747	0.0468704	0.399936
FUNDC1	98.2729	0.294951	0.148512	-1.98604	0.0470289	0.400863
PGS1	229.553	0.302276	0.152208	-1.98594	0.0470401	0.400863
PHYH	316.443	-0.242091	0.121922	1.98562	0.047075	0.400901
TCF4	1690.13	-0.411503	0.207326	1.98481	0.047166	0.401415
RNF214	206.945	0.251038	0.126525	-1.9841	0.0472449	0.401826
CD44	9479.02	0.329172	0.165965	-1.98338	0.0473248	0.402094
PANK1	75.4115	0.318876	0.160783	-1.98327	0.0473376	0.402094
MED31	113.296	-0.310565	0.156663	1.98237	0.0474376	0.402408
TOPBP1	265.916	-0.256474	0.129386	1.98225	0.0474518	0.402408
ZNF70	87.828	-0.293625	0.148137	1.98211	0.0474664	0.402408
NRP2	2740.82	0.436627	0.220646	-1.97886	0.0478323	0.405248
ARHGAP5	1094.19	-0.262656	0.132757	1.97846	0.0478763	0.405359
MDH2	1064.92	0.149897	0.0757957	-1.97764	0.0479693	0.40576
ZNF30	30.1744	-0.432184	0.218551	1.9775	0.0479855	0.40576
ADAM9	2949.63	0.122016	0.0617435	-1.97617	0.0481351	0.40598
PITPNA-AS1	47.2956	0.407691	0.206296	-1.97624	0.0481275	0.40598
PXN-AS1	121.507	-0.282721	0.14302	1.97679	0.048065	0.40598
ZNF260	265.055	-0.203564	0.102986	1.97662	0.0480846	0.40598
ZNF880	122.551	-0.40035	0.20264	1.97567	0.0481922	0.4062
LOC101448202	529.316	0.301485	0.152665	-1.97482	0.0482889	0.406437
2001-03-01	18.4667	0.47633	0.241174	-1.97505	0.0482627	0.406437
MBTPS2	477.262	0.239708	0.121396	-1.9746	0.0483132	0.406437
CECR5	187.24	0.267174	0.135324	-1.97432	0.0483451	0.406446
GLUD1	1325.6	-0.268079	0.135806	1.97398	0.0483839	0.406511
AQP3	17.8674	-0.48341	0.245123	1.97211	0.0485967	0.407017
CALM1	2761.14	-0.242241	0.122835	1.97209	0.0485999	0.407017
CXorf23	151.788	-0.293548	0.148828	1.9724	0.0485641	0.407017
MBNL3	79.667	-0.36773	0.186449	1.97228	0.0485776	0.407017
UBXN6	1676.83	0.170218	0.0863254	-1.97182	0.04863	0.407017
ZNF281	722.786	0.259029	0.131291	-1.97294	0.048502	0.407017
FAM13A	338.747	0.193077	0.0979678	-1.97082	0.0487441	0.407712
AMPD3	158.869	0.458933	0.233357	-1.96666	0.0492225	0.410146
FCGRT	1870.1	0.232485	0.118179	-1.96724	0.0491558	0.410146
GOLGA2	1724.32	0.162319	0.0825164	-1.96711	0.0491701	0.410146
MMD	200.871	0.383459	0.194929	-1.96718	0.0491627	0.410146
PRKAR1A	4232.96	-0.122608	0.062335	1.96692	0.049192	0.410146
TNK1	14.5409	0.485	0.24657	-1.96699	0.0491849	0.410146
ZNF519	32.7675	-0.405204	0.206211	1.96499	0.0494149	0.411488
TP53RK	342.318	0.247077	0.125788	-1.96424	0.0495024	0.411955
ZMYM5	196.841	-0.237607	0.120983	1.96396	0.0495345	0.411961
G3BP2	1751.85	-0.152902	0.0778859	1.96316	0.0496279	0.412444
SERPINB8	367.13	0.295227	0.150402	-1.96292	0.0496553	0.412444
DPY19L2	21.1905	0.446181	0.227401	-1.96209	0.049752	0.412985
SIPA1	302.043	0.238016	0.121344	-1.96151	0.0498201	0.41329
FUCA2	856.767	0.227917	0.116251	-1.96055	0.049931	0.413948
BRMS1L	133.038	-0.259801	0.132733	1.95732	0.0503094	0.41523
CHD3	3170.53	0.258223	0.131844	-1.95854	0.0501661	0.41523
FHDC1	18.7767	0.468721	0.239526	-1.95686	0.0503634	0.41523
HEATR5A	482.968	-0.22656	0.115679	1.95852	0.0501695	0.41523
IRS2	654.941	0.449437	0.229612	-1.95738	0.0503026	0.41523
KIAA0895	53.838	0.458307	0.234239	-1.95658	0.0503969	0.41523
MBTPS1	2651.55	0.128676	0.0657764	-1.95627	0.0504334	0.41523
PAK3	30.3849	-0.437089	0.223228	1.95804	0.0502252	0.41523
PCDHGB5	209.874	-0.357424	0.182577	1.95766	0.05027	0.41523
PDLIM4	846.56	0.293026	0.149773	-1.95647	0.0504093	0.41523
SCAF1	1054.08	0.166846	0.0852671	-1.95674	0.0503777	0.41523
PPRC1	596.081	0.221893	0.113452	-1.95583	0.0504847	0.415392
MED6	191.058	-0.21397	0.109441	1.95512	0.0505687	0.415562
OIP5-AS1	361.052	-0.213837	0.109368	1.95521	0.0505583	0.415562
DOCK11	284.559	-0.304525	0.15583	1.95422	0.0506751	0.415916
RPL23AP53	207.662	-0.269203	0.137742	1.95441	0.0506533	0.415916
ARRDC2	207.742	0.44006	0.225634	-1.95033	0.0511372	0.4188
KIAA1586	103.826	-0.312561	0.160272	1.95018	0.0511541	0.4188
NREP	862.992	-0.388026	0.198916	1.95071	0.0510917	0.4188
TCTN1	548.92	0.292221	0.149784	-1.95095	0.0510626	0.4188
GHDC	315.14	0.218283	0.111995	-1.94904	0.0512904	0.419393
OS9	4630.43	0.229746	0.117861	-1.94929	0.0512608	0.419393
GAS1	2919.82	0.476099	0.244349	-1.94844	0.0513621	0.419718
ARRDC1-AS1	87.5137	0.340328	0.174782	-1.94716	0.0515153	0.419785
CAPN1	1359.52	-0.193247	0.0992519	1.94704	0.0515301	0.419785
FAM20C	5457.53	0.228402	0.117297	-1.94722	0.0515083	0.419785
MAN2B1	2210.84	0.195185	0.100196	-1.94802	0.051412	0.419785
ZNRF3	138.49	0.278139	0.142811	-1.94759	0.0514635	0.419785
GID4	188.953	-0.286548	0.147276	1.94566	0.0516961	0.420768
OXNAD1	65.1179	0.329943	0.169593	-1.9455	0.0517148	0.420768
SEPW1	313.328	-0.280811	0.144375	1.94501	0.0517738	0.420987
ATP5L	852.762	0.158263	0.0814938	-1.94203	0.0521333	0.421083
DLG1	864.126	-0.255942	0.131793	1.94199	0.0521381	0.421083
GPR85	52.9456	0.335904	0.172969	-1.94199	0.0521384	0.421083
IVNS1ABP	1053.62	-0.216382	0.111373	1.94285	0.0520343	0.421083
LRRC8D	206.489	0.337128	0.173537	-1.94268	0.0520545	0.421083
NUDT1	110.486	-0.350511	0.180417	1.94278	0.0520426	0.421083
RRNAD1	151.56	0.29939	0.154144	-1.94228	0.0521036	0.421083
SERTAD3	324.001	-0.329502	0.169666	1.94207	0.0521287	0.421083
STC2	2161.56	0.485993	0.250059	-1.94351	0.0519546	0.421083
TOM1L1	177.789	0.306959	0.158019	-1.94254	0.0520715	0.421083
ZSWIM4	304.464	0.304044	0.156451	-1.94338	0.0519699	0.421083
ABHD3	40.2175	0.430441	0.221741	-1.94119	0.0522355	0.421608
CASC4	1634.64	-0.188131	0.096977	1.93996	0.0523848	0.422425
TIAM1	175.792	-0.45998	0.237124	1.93982	0.052401	0.422425
CNTN3	17.2018	0.457634	0.236026	-1.93891	0.0525124	0.422692
CTDSP1	1263.47	0.134969	0.0696672	-1.93733	0.0527046	0.422692
LCA5	124.658	-0.252475	0.130332	1.93718	0.0527238	0.422692
METTL14	192.548	-0.242233	0.125014	1.93764	0.0526668	0.422692
NUAK2	47.7116	0.485907	0.250716	-1.93808	0.0526135	0.422692
PRKRIR	449.021	-0.212656	0.10977	1.93729	0.0527094	0.422692
RHEB	410.545	0.203375	0.104899	-1.93877	0.0525288	0.422692
SUN2	1725.11	0.189641	0.0978659	-1.93776	0.052652	0.422692
USP6NL	211.347	0.265408	0.136917	-1.93845	0.0525677	0.422692
CPA4	42.853	0.484686	0.250287	-1.93652	0.0528038	0.422893
FARSA	460.98	0.221877	0.114579	-1.93644	0.0528133	0.422893
NBL1	25.3184	-0.478673	0.24731	1.93552	0.0529269	0.423544
MAGI1	270.154	-0.313564	0.162104	1.93434	0.0530718	0.424347
MFSD10	888.014	0.148587	0.0768219	-1.93417	0.0530919	0.424347
GNG12	3437.84	-0.191978	0.0992803	1.9337	0.0531505	0.424557
DENND2D	48.3452	0.435903	0.225551	-1.93262	0.0532834	0.424972
LOC553103	18.2027	0.482402	0.249627	-1.93249	0.0532994	0.424972
MTMR11	243.007	-0.348459	0.18027	1.93299	0.0532374	0.424972
CCRN4L	130.239	0.425791	0.22053	-1.93076	0.0535128	0.426202
RRP1	231.185	0.256128	0.13266	-1.93071	0.0535186	0.426202
ZNF93	87.7484	-0.367495	0.190379	1.93033	0.0535656	0.426317
MTCL1	305.198	-0.445787	0.231025	1.9296	0.0536558	0.426777
C10orf32	187.312	-0.277292	0.143826	1.92797	0.0538584	0.427095
DDX6	1700.08	-0.12528	0.0649723	1.92821	0.0538286	0.427095
GFPT2	958.23	0.475442	0.246557	-1.92832	0.0538147	0.427095
SH3RF1	421.803	-0.322893	0.16747	1.92806	0.0538476	0.427095
ZNF773	73.2188	-0.359835	0.186603	1.92835	0.0538116	0.427095
PRKCSH	3590.19	0.2897	0.150382	-1.92643	0.0540509	0.428362
SP110	157.532	-0.27315	0.141877	1.92526	0.0541963	0.428786
TGOLN2	3383.66	0.109093	0.0566642	-1.92525	0.0541976	0.428786
TWIST2	53.6843	0.42496	0.220733	-1.92522	0.0542023	0.428786
CDKN2B	1151.5	-0.444624	0.231016	1.92465	0.0542738	0.428835
TP63	241.255	0.433363	0.225137	-1.92488	0.0542443	0.428835
ADNP	974.711	-0.145964	0.0758792	1.92364	0.0544003	0.429576
MFHAS1	202.306	-0.295138	0.153491	1.92283	0.0545009	0.430112
PARP12	121.573	0.326918	0.170123	-1.92165	0.0546494	0.430779
SMIM10	80.1099	0.340124	0.176997	-1.92164	0.0546511	0.430779
DLG4	809.836	0.247871	0.129053	-1.92069	0.0547708	0.431464
PLAU	2312.66	-0.300862	0.156668	1.92038	0.0548103	0.431516
LSP1	1198.44	-0.480924	0.250525	1.91966	0.0549007	0.431969
SH3D19	1244.52	-0.25864	0.134809	1.91856	0.0550399	0.432805
HMGB1	1295.52	-0.201846	0.10523	1.91814	0.0550929	0.432962
SERPINE1	17539.4	-0.262264	0.136787	1.91731	0.0551981	0.43353
CEP350	983.504	0.338704	0.176746	-1.91634	0.055322	0.433829
PLSCR4	637.14	-0.306352	0.159868	1.91628	0.0553289	0.433829
TWF1	868.957	-0.202408	0.105628	1.91623	0.0553354	0.433829
SLC22A3	199.503	0.435005	0.227113	-1.91537	0.0554449	0.43417
TMTC2	75.3268	0.468505	0.244599	-1.9154	0.0554418	0.43417
KIAA1279	360.33	-0.196769	0.10275	1.91503	0.0554882	0.43425
CREG1	1307.39	0.447311	0.233614	-1.91474	0.0555252	0.43428
PHF1	69.2113	-0.307574	0.160719	1.91374	0.0556536	0.434767
VPS36	474.144	-0.268653	0.14037	1.91389	0.0556337	0.434767
NLN	443.569	-0.284824	0.148871	1.91323	0.0557189	0.434944
PLEKHH2	191.429	-0.366829	0.191751	1.91304	0.0557425	0.434944
HS6ST1	287.117	0.456691	0.238852	-1.91203	0.0558729	0.435702
B4GALT4	268.631	0.209241	0.109628	-1.90864	0.0563083	0.438145
C7orf49	275.792	-0.199905	0.104801	1.90747	0.05646	0.438145
CCNT2	397.136	-0.180315	0.094577	1.90654	0.0565806	0.438145
DDOST	2576.6	0.307721	0.161304	-1.90771	0.0564284	0.438145
DGKI	35.2168	0.473503	0.248363	-1.9065	0.0565858	0.438145
ELF1	526.521	-0.200438	0.10513	1.90657	0.0565763	0.438145
HERC6	78.5344	-0.374618	0.196496	1.90649	0.0565865	0.438145
HERPUD2	362.318	-0.214021	0.1122	1.9075	0.056456	0.438145
LINC00341	122.131	-0.476655	0.249823	1.90797	0.0563949	0.438145
OSBPL10	170.078	-0.427032	0.223678	1.90914	0.0562444	0.438145
UQCRBP1	35.4073	0.419455	0.219954	-1.90702	0.0565184	0.438145
VPS41	745.403	-0.167976	0.0880736	1.90722	0.0564923	0.438145
GAPDHS	22.8563	0.447435	0.234754	-1.90597	0.0566538	0.438407
ZNF287	84.8303	-0.333388	0.175138	1.90357	0.0569656	0.440561
PHF6	303.164	-0.227805	0.119728	1.90269	0.0570816	0.441198
NCOA7	961.217	0.455475	0.239455	-1.90213	0.0571536	0.441495
AKTIP	202.554	-0.289136	0.152129	1.90059	0.0573551	0.442638
GLS	2004.7	-0.325918	0.171492	1.90049	0.057369	0.442638
MED21	247.38	-0.223307	0.117518	1.9002	0.0574071	0.442672
SAMD9L	389.078	-0.247986	0.130574	1.89919	0.057539	0.443253
ZNF697	261.443	0.237451	0.125033	-1.89911	0.05755	0.443253
ESM1	131.756	0.454605	0.239616	-1.89722	0.0577984	0.443996
GOLM1	2855.14	0.227667	0.120007	-1.89711	0.0578138	0.443996
MAPK8IP1	190.152	0.264016	0.139145	-1.89742	0.0577723	0.443996
SNX8	421.737	-0.255325	0.134542	1.89773	0.0577312	0.443996
VPS13C	1331.75	-0.225537	0.118886	1.89709	0.0578155	0.443996
CORO1C	1971.96	-0.213453	0.112556	1.89642	0.0579043	0.444418
APBB1IP	396.458	0.472816	0.249366	-1.89607	0.0579503	0.444511
TRIM35	208.275	-0.23701	0.125046	1.89539	0.0580414	0.44495
CTDSPL2	335.996	-0.186953	0.0987144	1.89387	0.0582416	0.445482
HSD17B11	299.415	-0.304212	0.160581	1.89444	0.0581666	0.445482
LZTS2	1129.36	-0.231236	0.122165	1.89282	0.0583821	0.445482
TRPC1	267.921	-0.225651	0.119186	1.89327	0.0583225	0.445482
TXNDC11	395.997	0.194264	0.102622	-1.89301	0.0583564	0.445482
UHRF2	548.813	-0.341494	0.180382	1.89318	0.0583345	0.445482
ZCCHC11	522.377	0.178673	0.0943911	-1.89291	0.0583704	0.445482
ZNHIT6	318.681	-0.209578	0.110717	1.89291	0.0583692	0.445482
RPS14P3	68.0393	0.339472	0.179379	-1.89249	0.0584264	0.445561
NAV3	430.401	0.405251	0.214203	-1.89191	0.0585036	0.445891
DCAF5	744.378	0.139852	0.0739643	-1.89081	0.0586499	0.446731
SOCS3	2369.38	0.307742	0.162778	-1.89057	0.058682	0.446731
FKBP10	6588.42	0.345965	0.183114	-1.88934	0.0588467	0.447467
MRVI1	201.816	-0.468698	0.248053	1.88951	0.0588233	0.447467
INSC	33.9384	-0.379396	0.200837	1.88907	0.0588823	0.447479
AATF	334.896	0.194425	0.102989	-1.88781	0.0590509	0.448347
DKK3	2718.27	-0.297919	0.157852	1.88734	0.059115	0.448347
LPAR4	16.7767	0.426588	0.226073	-1.88695	0.0591673	0.448347
NYNRIN	303.069	-0.371287	0.196688	1.8877	0.0590667	0.448347
USO1	1288.92	0.121711	0.0644956	-1.88712	0.059144	0.448347
SLC20A2	365.898	-0.331204	0.175649	1.8856	0.059349	0.449464
CFAP36	312.911	0.182962	0.0971038	-1.8842	0.0595386	0.450591
HDAC4	423.302	0.311905	0.165556	-1.88399	0.0595664	0.450591
ABHD4	798.609	-0.244298	0.13025	1.8756	0.0607098	0.451439
ALDH3B1	459.105	0.353117	0.188054	-1.87774	0.0604162	0.451439
ATP5J2	162.299	0.265609	0.141377	-1.87873	0.0602816	0.451439
BRSK1	208.897	0.25093	0.133411	-1.88088	0.0599883	0.451439
CCDC103	66.4585	0.454378	0.24184	-1.87884	0.0602669	0.451439
CCNG2	550.57	-0.298606	0.158929	1.87886	0.0602638	0.451439
CERKL	64.1116	-0.45474	0.242259	1.87708	0.0605073	0.451439
CGRRF1	82.8397	-0.287395	0.153151	1.87655	0.0605799	0.451439
COLGALT2	36.1592	-0.470413	0.250722	1.87623	0.0606232	0.451439
DERL2	335.549	0.175423	0.0934546	-1.87709	0.0605057	0.451439
DOT1L	675.597	-0.215594	0.114811	1.87781	0.0604071	0.451439
EGFL7	54.3351	0.452183	0.240336	-1.88146	0.059909	0.451439
HDAC6	535.439	0.214464	0.11403	-1.88077	0.0600037	0.451439
KIF9	63.4015	-0.370929	0.197624	1.87694	0.0605259	0.451439
KREMEN1	400.863	0.408898	0.217722	-1.87807	0.0603712	0.451439
MEX3B	193.622	-0.315431	0.168128	1.87614	0.0606363	0.451439
MICALL1	560.066	0.253356	0.135028	-1.87632	0.0606116	0.451439
NEIL2	145.522	0.274819	0.146296	-1.87851	0.0603112	0.451439
NMI	172.667	0.295165	0.156794	-1.8825	0.0597677	0.451439
PLIN4	41.1547	-0.46827	0.248909	1.88129	0.0599325	0.451439
PNMAL2	27.5849	-0.434672	0.231741	1.87568	0.0606994	0.451439
PSMD8	1119.4	0.145398	0.077315	-1.88059	0.0600277	0.451439
SBNO1	621.534	-0.156172	0.0831223	1.87883	0.0602681	0.451439
SETD1A	426.28	0.160492	0.0855305	-1.87643	0.0605964	0.451439
STK16	225.886	0.252917	0.134835	-1.87576	0.0606885	0.451439
TIMP2	20350	-0.353434	0.187734	1.88263	0.0597503	0.451439
TMSB4X	11460.9	0.252229	0.13406	-1.88146	0.0599089	0.451439
VAMP4	193.321	-0.347024	0.18469	1.87896	0.0602505	0.451439
ZBTB41	422.002	-0.156473	0.0833023	1.87838	0.0603294	0.451439
ZNF714	69.2822	-0.364879	0.194132	1.87954	0.0601701	0.451439
FBXO31	395.922	-0.209246	0.11159	1.87513	0.060775	0.451668
DEPTOR	29.7759	-0.446775	0.238561	1.87279	0.061097	0.452609
HLX	130.025	0.408167	0.217983	-1.87247	0.061141	0.452609
PSMD2	1833.4	0.136586	0.0729158	-1.8732	0.0610404	0.452609
SLC9A9	221.862	-0.393238	0.209965	1.87288	0.0610856	0.452609
SPOP	509.761	-0.166048	0.0886205	1.8737	0.0609718	0.452609
SRBD1	169.336	-0.243603	0.130007	1.87377	0.0609626	0.452609
THOC6	409.592	0.304807	0.162784	-1.87246	0.0611428	0.452609
LINC01423	88.9743	-0.436058	0.232927	1.87208	0.0611959	0.452746
ALDH4A1	202.11	-0.320675	0.171364	1.87131	0.0613027	0.453026
NAALADL2	114.485	-0.412243	0.220285	1.87141	0.061288	0.453026
PGD	2146.98	0.214234	0.114537	-1.87044	0.0614226	0.453657
FABP5	23.352	-0.465967	0.249195	1.86989	0.0614987	0.453708
TMEM18	159.785	0.227264	0.12153	-1.87003	0.0614797	0.453708
C3orf14	61.2155	-0.391683	0.209598	1.86874	0.0616594	0.454606
ZNF92	127.366	-0.284861	0.152453	1.86852	0.0616897	0.454606
ERCC2	335.073	0.22543	0.120747	-1.86696	0.0619068	0.45544
SIX5	378.821	0.269834	0.144509	-1.86725	0.0618662	0.45544
TXNDC12	573.561	0.229831	0.123089	-1.8672	0.0618738	0.45544
TNFRSF18	24.9432	0.465109	0.249177	-1.86659	0.0619594	0.455572
HAS1	316.336	0.416097	0.222971	-1.86615	0.0620205	0.455766
GJD3	174.614	0.439617	0.235801	-1.86436	0.0622716	0.457355
PAPOLG	205.932	-0.222053	0.119212	1.86267	0.0625081	0.458835
BCL2L11	352.512	-0.257208	0.1382	1.86113	0.0627255	0.459404
BNIP3L	2341.37	0.187577	0.100763	-1.86156	0.0626649	0.459404
OAS1	33.4388	-0.447202	0.240212	1.8617	0.0626459	0.459404
PIGV	154.833	0.262332	0.140938	-1.86133	0.0626974	0.459404
FABP3	36.2849	-0.457385	0.245866	1.8603	0.0628425	0.460005
AHNAK	25938.6	-0.315105	0.169497	1.85906	0.0630189	0.460365
GAS8	181.207	0.242123	0.130279	-1.8585	0.0630981	0.460365
LOC100507437	28.5338	0.443196	0.238357	-1.85938	0.0629738	0.460365
RPL13AP20	65.7209	0.312504	0.168151	-1.85847	0.0631021	0.460365
TNFAIP8L3	85.1696	0.34288	0.184464	-1.85879	0.0630571	0.460365
ZNF184	91.95	-0.283627	0.152568	1.85902	0.0630237	0.460365
MEF2BNB	34.1567	0.394215	0.212166	-1.85805	0.0631616	0.460543
2007-03-01	762.74	-0.173647	0.0934966	1.85726	0.0632743	0.461109
CAPN10	185.671	0.223495	0.120383	-1.85653	0.0633778	0.461607
CDC23	239.501	-0.23477	0.126575	1.85479	0.0636256	0.46253
LINC00665	49.2298	0.352321	0.189934	-1.85497	0.063601	0.46253
MGEA5	1356.79	-0.172853	0.0931818	1.85501	0.0635954	0.46253
TAPBPL	232.087	0.439963	0.237221	-1.85466	0.0636454	0.46253
ZNF510	120.766	-0.242451	0.130804	1.85355	0.0638036	0.463423
FBXO11	721.001	-0.177132	0.0957038	1.85084	0.0641925	0.46599
ZNF395	838.18	0.2695	0.145657	-1.85025	0.0642781	0.466354
ARVCF	163.352	-0.3316	0.179332	1.84908	0.0644465	0.467024
BLOC1S2	422.121	-0.190273	0.102939	1.8484	0.0645439	0.467024
RRAGB	213.549	-0.214737	0.116134	1.84905	0.0644511	0.467024
TAF15	1157.03	0.193718	0.104805	-1.84836	0.0645501	0.467024
TBC1D12	250.633	-0.440446	0.23829	1.84836	0.0645498	0.467024
ZFP82	67.0222	-0.340421	0.184198	1.84813	0.0645839	0.467024
OPN1SW	47.7215	0.35834	0.193946	-1.84763	0.0646564	0.467291
NCOA5	367.397	0.226169	0.122483	-1.84654	0.0648138	0.468171
FHL1	1303.05	-0.416159	0.22543	1.84607	0.0648823	0.468408
FGFR1OP	219.818	0.18784	0.101811	-1.84498	0.0650409	0.46859
HSP90AB1	7596.07	0.116389	0.0630863	-1.84491	0.0650503	0.46859
LOC100130987	16.8731	0.45716	0.247714	-1.84552	0.0649622	0.46859
VKORC1L1	587.136	0.161676	0.0876289	-1.84501	0.0650357	0.46859
LOC374443	79.1768	-0.304971	0.1654	1.84385	0.0652056	0.468937
SCN2A	52.7112	-0.436943	0.236961	1.84395	0.0651909	0.468937
UBE4A	702.555	-0.134128	0.0727417	1.84389	0.0651986	0.468937
ARID4B	683.04	-0.127792	0.0693264	1.84333	0.0652804	0.469218
NPTX2	160.042	-0.378995	0.205644	1.84297	0.065334	0.469347
AKT3	913.319	-0.208686	0.113343	1.8412	0.0655928	0.470726
BLOC1S6	930.365	-0.164571	0.089384	1.84116	0.0655976	0.470726
SASH1	1005.8	-0.290212	0.157659	1.84076	0.0656568	0.470893
TMA7	519.332	-0.163443	0.0888212	1.84014	0.0657482	0.471034
TPT1-AS1	315.596	0.288375	0.156694	-1.84037	0.0657133	0.471034
PVR	402.222	0.271571	0.147613	-1.83974	0.0658057	0.471189
PLAC9	322.457	-0.322944	0.175587	1.83922	0.0658828	0.471484
CCT5	1174.07	0.146615	0.0797595	-1.83821	0.0660317	0.472117
MAP3K3	565.604	-0.217768	0.118473	1.83813	0.0660432	0.472117
ARHGEF10L	464.634	0.305246	0.166524	-1.83305	0.0667958	0.472829
BDH1	27.6789	0.40201	0.219118	-1.83468	0.0665533	0.472829
CTSH	25.4115	-0.458587	0.250187	1.83298	0.0668059	0.472829
EVL	349.336	-0.250225	0.136372	1.83487	0.0665252	0.472829
FAM160A1	49.1131	0.459847	0.250584	-1.8351	0.0664902	0.472829
FGD6	275.844	-0.310832	0.169573	1.83303	0.0667985	0.472829
HNMT	485.193	0.403507	0.22018	-1.83262	0.0668588	0.472829
KCNJ2-AS1	18.3501	0.459981	0.250585	-1.83563	0.0664123	0.472829
KSR1	178.153	0.45673	0.249139	-1.83323	0.0667682	0.472829
NAP1L3	156.787	-0.338664	0.184542	1.83516	0.0664822	0.472829
NCKAP1	2173.86	-0.152927	0.0834262	1.83308	0.0667912	0.472829
PES1	683.46	0.156906	0.0855084	-1.83498	0.0665087	0.472829
RAD54B	36.8408	-0.378728	0.206374	1.83515	0.0664834	0.472829
RBFOX2	2927.4	-0.262643	0.143194	1.83418	0.0666272	0.472829
SFR1	57.3889	-0.354373	0.193325	1.83304	0.0667964	0.472829
STIP1	1142.74	0.150835	0.0823178	-1.83235	0.066899	0.472829
TM9SF1	1041.97	0.136643	0.0743894	-1.83686	0.0662306	0.472829
VPS37B	467.264	-0.234829	0.127989	1.83475	0.0665422	0.472829
ZMPSTE24	982.771	-0.191177	0.10416	1.83542	0.0664431	0.472829
ZNF385D	188.539	-0.438784	0.239449	1.83248	0.0668803	0.472829
ZNF511	198.192	0.224485	0.122306	-1.83543	0.0664415	0.472829
REST	489.361	-0.155039	0.0846691	1.83112	0.0670823	0.47387
FBXO36	74.4899	-0.308457	0.168569	1.82985	0.0672719	0.473906
HTATSF1	484.197	-0.19389	0.10597	1.82968	0.067298	0.473906
PCNP	1375.47	-0.190767	0.104279	1.8294	0.06734	0.473906
SHC3	62.3756	0.443239	0.242235	-1.82979	0.0672819	0.473906
SPECC1L	392.924	-0.198176	0.108309	1.82972	0.0672916	0.473906
STARD10	162.802	0.32729	0.17884	-1.83007	0.0672399	0.473906
ZBTB2	212.877	-0.208356	0.113891	1.82943	0.0673348	0.473906
OTUD7B	415.88	-0.247069	0.13509	1.82892	0.0674115	0.474155
UBL3	1445.01	-0.382683	0.209304	1.82836	0.0674959	0.474495
ACTR2	3592.94	-0.217583	0.119043	1.82777	0.0675846	0.474864
LOC100289580	222.039	0.330142	0.180733	-1.82669	0.0677467	0.475749
A2M	1480.04	-0.418786	0.229469	1.82502	0.0679981	0.475841
C1orf43	1366.02	0.120293	0.0659317	-1.8245	0.068076	0.475841
CFAP44	297.765	0.403984	0.221449	-1.82427	0.068111	0.475841
CREBRF	482.51	-0.227934	0.124904	1.82488	0.0680196	0.475841
DLEU2	77.9347	-0.351717	0.192807	1.8242	0.0681222	0.475841
FBXW2	683.764	-0.190411	0.104336	1.82498	0.0680044	0.475841
NUBPL	95.2833	-0.273042	0.149672	1.82428	0.0681104	0.475841
PAPSS1	1312.6	0.156269	0.0856556	-1.82439	0.0680928	0.475841
RHOA	4830.59	-0.181362	0.0993355	1.82575	0.0678874	0.475841
XRN2	1133.11	0.116177	0.0636644	-1.82483	0.068027	0.475841
CLEC11A	977.627	0.267215	0.146553	-1.82333	0.0682537	0.475881
GALT	186.226	0.260069	0.142638	-1.82329	0.06826	0.475881
LMF2	1385.49	0.196035	0.107536	-1.82296	0.0683091	0.475881
MBNL1	2326.54	-0.313196	0.171791	1.82312	0.0682849	0.475881
PSMA3	505.404	0.241017	0.132211	-1.82297	0.0683075	0.475881
EREG	217.224	0.449365	0.246561	-1.82253	0.0683744	0.476083
GPC1	1875.6	-0.281309	0.15439	1.82207	0.0684442	0.476316
BNIP2	512.856	-0.187239	0.102792	1.82153	0.0685266	0.476385
NMT2	310.644	-0.195958	0.107573	1.82163	0.0685114	0.476385
MPI	230.561	0.228156	0.125272	-1.82129	0.0685633	0.476388
R3HDM2	750.485	0.183712	0.100922	-1.82033	0.0687085	0.477144
WDR83OS	605.47	0.127457	0.0700291	-1.82006	0.0687493	0.477175
B4GALT3	339.288	0.257193	0.14137	-1.81929	0.0688675	0.477192
CLASP1	726.988	0.159302	0.0875423	-1.81971	0.0688027	0.477192
COTL1	1670.35	0.253392	0.13929	-1.81917	0.068886	0.477192
NUDCD3	817.736	-0.150051	0.0824869	1.81909	0.068897	0.477192
IPO8	640.126	-0.141851	0.0780317	1.81787	0.0690843	0.47723
KIAA0319L	632.906	0.334723	0.184114	-1.81802	0.0690605	0.47723
LZTR1	966.279	-0.200023	0.110023	1.81801	0.069062	0.47723
MSRB3	1195.19	-0.372447	0.20479	1.81868	0.0689603	0.47723
TRANK1	492.242	0.318945	0.175426	-1.81811	0.0690467	0.47723
CLCF1	353.07	0.399229	0.219707	-1.8171	0.0692023	0.477543
RABEP1	858.661	-0.172585	0.0949754	1.81715	0.0691934	0.477543
EIF2AK2	447.24	-0.168863	0.0929626	1.81646	0.0693004	0.477969
ACP2	364.878	0.293477	0.161712	-1.81481	0.0695535	0.478434
ASB1	467.984	0.266058	0.146679	-1.81388	0.0696957	0.478434
ASPN	217.727	-0.338056	0.186239	1.81517	0.0694972	0.478434
DBR1	115.002	-0.243389	0.134181	1.81389	0.0696945	0.478434
PAQR6	34.4264	0.442014	0.243661	-1.81405	0.0696698	0.478434
PCMTD2	477.472	-0.215707	0.118916	1.81394	0.0696862	0.478434
SCAND1	457.989	0.158012	0.0870612	-1.81495	0.0695313	0.478434
SLC12A8	55.6446	0.454178	0.250352	-1.81415	0.0696541	0.478434
SSRP1	947.049	0.15001	0.0826941	-1.81403	0.0696726	0.478434
PPP1CB	1999.24	-0.236899	0.130621	1.81363	0.0697343	0.478449
DDX54	614.771	0.134073	0.0739486	-1.81306	0.0698222	0.478802
EPHX1	2360.42	-0.322833	0.178168	1.81196	0.0699927	0.479454
LRRC46	15.7803	0.440477	0.243219	-1.81103	0.0701364	0.479454
NEFH	45.7117	0.377197	0.208194	-1.81175	0.0700242	0.479454
P4HA2	1440.8	0.381271	0.210509	-1.81119	0.0701115	0.479454
PDDC1	646.732	-0.170954	0.0943886	1.81118	0.0701137	0.479454
SEMA6C	120.421	-0.293715	0.162135	1.81154	0.0700568	0.479454
ELK4	733.438	-0.187903	0.10381	1.81007	0.0702853	0.479962
FAM225A	121.86	-0.338601	0.187113	1.80961	0.0703569	0.479962
FBXO28	402.169	-0.200566	0.110828	1.80971	0.0703409	0.479962
ZNF441	77.4313	-0.343131	0.189616	1.80962	0.0703552	0.479962
CEP89	180.194	-0.269665	0.149078	1.80889	0.0704677	0.480197
MRPL1	139.921	-0.279712	0.15465	1.80868	0.0705011	0.480197
SLC9A3R2	497.072	0.2096	0.115866	-1.80899	0.0704532	0.480197
NBEAL2	194.206	0.202397	0.111931	-1.80823	0.0705701	0.480418
APMAP	1072.4	0.260099	0.143971	-1.80661	0.0708224	0.48179
MRPL12	315.307	0.187986	0.104063	-1.80647	0.070845	0.48179
NPNT	25.6665	-0.448668	0.248533	1.80527	0.0710324	0.482315
POLD4	292.513	0.217554	0.120504	-1.80537	0.0710173	0.482315
SERTAD4-AS1	46.5287	-0.433676	0.240193	1.80553	0.0709911	0.482315
FAM8A1	866.29	-0.192584	0.106697	1.80496	0.071081	0.482395
ARNT	786.11	0.145176	0.080461	-1.8043	0.0711835	0.482593
ATP5H	625.073	0.190554	0.105603	-1.80443	0.071164	0.482593
COX10-AS1	54.0088	-0.344822	0.191267	1.80283	0.0714154	0.482648
CTSK	5171.51	-0.395631	0.219494	1.80247	0.0714714	0.482648
DAZAP1	701.122	0.151258	0.0839172	-1.80247	0.0714718	0.482648
MORF4L1	1912.27	-0.153682	0.0852337	1.80306	0.0713785	0.482648
NCL	4248.04	0.120865	0.0670588	-1.80238	0.0714858	0.482648
PCMT1	549.462	-0.237352	0.131576	1.80392	0.0712443	0.482648
PNP	158.507	0.311208	0.172621	-1.80284	0.0714135	0.482648
WFDC21P	38.127	0.41773	0.231616	-1.80354	0.0713029	0.482648
SNHG16	519.062	0.203203	0.112768	-1.80196	0.0715518	0.482846
H2AFV	735.014	-0.207447	0.11515	1.80153	0.071619	0.483013
TRAF6	180.801	-0.257227	0.142798	1.80134	0.0716501	0.483013
CYP1B1	11200	0.43063	0.239098	-1.80106	0.071693	0.483054
KLHDC2	466.452	-0.187769	0.104276	1.80069	0.0717515	0.483201
SIL1	798.01	0.314378	0.174734	-1.79918	0.0719901	0.484559
FAXDC2	373.805	-0.254816	0.141755	1.79757	0.0722447	0.485728
PELI1	106.534	0.266839	0.148422	-1.79785	0.072201	0.485728
VTA1	427.37	-0.223384	0.124283	1.79738	0.0722748	0.485728
ZNF300	96.7107	-0.291049	0.161974	1.79689	0.0723538	0.48601
PLCL1	57.4327	0.351645	0.195727	-1.79661	0.0723971	0.486053
ATP13A1	759.637	0.226017	0.125828	-1.79623	0.0724579	0.486212
NASP	451.815	0.162144	0.0903154	-1.7953	0.0726054	0.486704
NTPCR	174.527	0.243295	0.135509	-1.79543	0.072586	0.486704
LINC01137	31.251	0.43711	0.2437	-1.79364	0.0728707	0.487504
LOC407835	103.103	0.278972	0.15552	-1.7938	0.0728455	0.487504
SEC14L2	164.79	-0.250434	0.139625	1.79362	0.0728732	0.487504
TENM4	1911.42	-0.379391	0.211463	1.79412	0.0727933	0.487504
ADAMTS9	69.7611	0.446713	0.249119	-1.79317	0.072946	0.487743
DIAPH1	1021.34	-0.297638	0.166025	1.79273	0.0730157	0.487834
PPP2R5B	283.578	0.181545	0.101287	-1.79239	0.0730711	0.487834
TMEM26	99.9658	-0.361902	0.201905	1.79243	0.0730635	0.487834
DFNA5	315.104	0.251916	0.140675	-1.79077	0.07333	0.4884
LRRC37BP1	215.529	-0.238416	0.13321	1.78977	0.0734906	0.4884
MFN1	445.144	-0.193909	0.108231	1.79161	0.0731951	0.4884
NARF	309.061	0.209784	0.117154	-1.79067	0.0733466	0.4884
NINJ1	553.861	0.2854	0.159347	-1.79105	0.0732846	0.4884
NUPL1	468.003	0.194318	0.108559	-1.78998	0.0734566	0.4884
TFB2M	147.397	0.225616	0.125993	-1.7907	0.0733417	0.4884
TNFRSF19	2546.65	-0.400509	0.223754	1.78995	0.0734621	0.4884
ZNF568	119.465	-0.244033	0.136298	1.79044	0.0733834	0.4884
SKI	2269.49	-0.168113	0.0939644	1.78911	0.073597	0.488859
AGAP1	620.566	0.357186	0.199699	-1.78862	0.0736758	0.489136
ANKRD36	97.7942	-0.353061	0.197442	1.78817	0.0737482	0.489311
KIAA1429	628.726	-0.154444	0.0863781	1.788	0.0737767	0.489311
ESYT1	1298.88	-0.227906	0.127575	1.78644	0.0740283	0.490484
MRRF	180.033	0.207795	0.116314	-1.7865	0.0740178	0.490484
SMPDL3A	141.465	0.388318	0.217437	-1.78588	0.0741182	0.490832
CCT7	1508.09	0.137506	0.077064	-1.78431	0.0743735	0.491532
CYB5D1	270.307	0.328636	0.184114	-1.78496	0.074268	0.491532
GLO1	873.826	-0.141246	0.0791545	1.78443	0.0743532	0.491532
RND3	3441.06	0.243634	0.136526	-1.78453	0.0743372	0.491532
B3GALT6	471.353	0.148408	0.0831984	-1.78378	0.0744588	0.4916
PLP2	941.699	-0.23279	0.1305	1.78382	0.0744523	0.4916
PCYT1A	308.155	-0.204288	0.114554	1.78333	0.0745319	0.491836
PTN	358.371	-0.404469	0.226865	1.78286	0.074609	0.492097
MPRIP	2762.92	-0.159498	0.0894866	1.78236	0.0746902	0.492385
CABIN1	795.675	-0.197369	0.110774	1.78172	0.074795	0.492582
COMT	1120.81	0.202692	0.113748	-1.78194	0.0747593	0.492582
C8orf33	478.368	-0.192693	0.108269	1.77976	0.0751156	0.493209
CCDC113	57.4071	-0.340674	0.191349	1.78038	0.0750141	0.493209
LOC145783	57.6743	-0.316816	0.177907	1.78079	0.0749465	0.493209
[truncated: 24,218 more rows]

## Sheet: Supplementary Table 6c
Supplementary Table 6 - RNA sequencing of MSC responses to breast cancer secretomes
MDA-WT vs MCF7
Gene Identifiers	mean normalised counts, averaged over all samples from both conditions	log2(MDA-WT/MCF7)	standard error (log2(MDA-WT/MCF7)	Wald statistic	p value	p value (adjusted for multiple testing with the Benjamini-Hochberg procedure)
SLC39A14	3765.45	1.8581	0.0832404	-22.3221	2.25328e-110	2.95721e-106
MMP3	660.455	3.45467	0.229677	-15.0414	3.92903e-51	2.57823e-47
SLC16A3	2375.13	0.986711	0.075435	-13.0803	4.26824e-39	1.86721e-35
C3	3414.25	2.76162	0.227509	-12.1385	6.60189e-34	2.16608e-30
GCH1	117.941	2.03381	0.173704	-11.7085	1.15298e-31	2.52194e-28
MMP13	12170.4	2.46726	0.210566	-11.7173	1.03953e-31	2.52194e-28
CXCL1	992.216	2.6595	0.23455	-11.3387	8.43748e-30	1.58191e-26
PGK1	3081.64	0.65709	0.0581697	-11.2961	1.37176e-29	2.25038e-26
NFKBIZ	2439.39	1.5821	0.148419	-10.6597	1.57138e-26	2.29142e-23
CHI3L2	739.486	2.32618	0.223586	-10.4039	2.3788e-25	3.12194e-22
MOXD1	989.02	1.73432	0.167991	-10.3239	5.49431e-25	6.55521e-22
CXCL8	2396.69	2.4111	0.234393	-10.2866	8.10115e-25	8.85995e-22
CXCL5	103.75	2.36615	0.235374	-10.0527	8.93438e-24	9.0196e-21
SOD2	9387.89	1.98517	0.201654	-9.84442	7.24578e-23	6.7924e-20
TRIM8	2008.49	0.581085	0.0597881	-9.71907	2.50055e-22	2.18781e-19
MMP8	270.748	2.24997	0.23495	-9.57636	1.00525e-21	8.24558e-19
ABCC3	876.887	0.93808	0.104219	-9.00105	2.23577e-19	1.72602e-16
SLC39A8	322.756	1.77472	0.200946	-8.83179	1.0301e-18	7.51059e-16
PNRC1	895.6	0.840296	0.0995863	-8.43787	3.23183e-17	2.23235e-14
ICAM1	614.346	1.65802	0.210408	-7.88001	3.27355e-15	2.1481e-12
TRPA1	171.187	1.32605	0.17028	-7.78748	6.83605e-15	4.27221e-12
FTH1	107413	0.913015	0.119422	-7.6453	2.08451e-14	1.2435e-11
CXCL2	580.437	1.62442	0.220669	-7.36134	1.82071e-13	1.03891e-10
TPI1	3131	0.632184	0.0865456	-7.30463	2.78033e-13	1.52038e-10
MT1X	88.2209	1.32922	0.184794	-7.19295	6.34041e-13	3.32846e-10
CCL2	1484.03	1.47586	0.206838	-7.13535	9.65389e-13	4.87299e-10
NTN1	1380.37	1.4214	0.199799	-7.11417	1.1259e-12	5.47272e-10
FTH1P3	193.763	1.1528	0.163438	-7.05346	1.74523e-12	8.18012e-10
TYMP	257.663	1.09441	0.155451	-7.04021	1.91944e-12	8.68645e-10
C1R	12357.6	0.914132	0.130221	-7.01984	2.22122e-12	9.71712e-10
TNIP1	1087	0.788221	0.114804	-6.86577	6.61335e-12	2.79979e-09
SBNO2	1904.72	0.400371	0.0584194	-6.85339	7.21224e-12	2.95792e-09
CD82	1764.44	0.763584	0.111493	-6.84871	7.4521e-12	2.96368e-09
NAMPT	2052.6	1.48669	0.219229	-6.78147	1.1896e-11	4.59185e-09
HS3ST3B1	250.661	0.977387	0.146806	-6.65766	2.7823e-11	1.04328e-08
EHF	16.3212	1.53175	0.230373	-6.64899	2.95113e-11	1.07585e-08
MT1E	131.856	1.32694	0.200292	-6.62501	3.47219e-11	1.23159e-08
RELB	428.135	1.06758	0.16202	-6.58918	4.42261e-11	1.52743e-08
PLOD2	4730.77	0.683445	0.104483	-6.54124	6.10127e-11	2.05316e-08
CH25H	339.096	1.2177	0.189361	-6.43054	1.2715e-10	4.1718e-08
CXCL6	1787.02	1.4301	0.224549	-6.36876	1.90566e-10	6.09998e-08
NFKBIA	1639.78	0.911883	0.147039	-6.20162	5.58842e-10	1.74625e-07
ZNF436	321.964	-0.653287	0.106004	6.16287	7.1437e-10	2.18032e-07
ID2	706.876	1.02061	0.16739	-6.09719	1.07946e-09	3.21975e-07
PID1	222.644	1.19031	0.196653	-6.05287	1.4229e-09	4.10384e-07
TFRC	1965.27	0.715686	0.118273	-6.05112	1.43841e-09	4.10384e-07
G0S2	264.952	1.40114	0.232533	-6.02555	1.68535e-09	4.70607e-07
NFKB2	851.059	0.777246	0.129979	-5.97976	2.23469e-09	6.11e-07
SLC43A2	380.198	1.22367	0.206717	-5.91952	3.22884e-09	8.64803e-07
CXCL3	262.261	1.38719	0.234536	-5.91463	3.32618e-09	8.73057e-07
WTAP	1748.9	1.07776	0.184005	-5.85726	4.70577e-09	1.21095e-06
C1S	11978.1	0.733663	0.125912	-5.82681	5.64977e-09	1.42591e-06
GYS1	577.328	0.619224	0.10706	-5.78392	7.29793e-09	1.79618e-06
P4HA1	2479.34	0.732363	0.126667	-5.7818	7.39054e-09	1.79618e-06
IRAK3	123.881	1.12655	0.196846	-5.723	1.0466e-08	2.49738e-06
GSAP	142.544	0.785851	0.137414	-5.71887	1.07233e-08	2.51309e-06
PRDM16	208.473	-0.899804	0.158033	5.69377	1.24262e-08	2.86107e-06
GLIS3	1153.46	0.867129	0.152694	-5.67885	1.35601e-08	3.06833e-06
RARRES2	466.713	1.30894	0.230676	-5.67438	1.39189e-08	3.09613e-06
COMP	448.158	-1.31915	0.233577	5.6476	1.62704e-08	3.55536e-06
FNDC1	3741.08	1.21746	0.215674	-5.64493	1.65252e-08	3.55536e-06
TRIL	20.6095	-1.30378	0.23429	5.56483	2.62414e-08	5.55471e-06
ALDOC	282.545	0.684287	0.123821	-5.52642	3.26839e-08	6.80863e-06
BMF	180.111	-1.00602	0.18436	5.4568	4.84803e-08	9.94148e-06
MIR210HG	59.5337	1.0865	0.199683	-5.4411	5.29528e-08	1.06916e-05
ADAMTS5	1041.43	1.03985	0.192093	-5.41325	6.18901e-08	1.23068e-05
TNFRSF11B	711.42	0.981914	0.182726	-5.37368	7.71437e-08	1.5111e-05
FNDC3B	2881.17	0.529136	0.0986768	-5.36232	8.21602e-08	1.58569e-05
PDZRN3	1096.44	0.718289	0.134487	-5.34096	9.24556e-08	1.75853e-05
C1QTNF1	866.167	1.13469	0.213603	-5.31216	1.08335e-07	2.03113e-05
BID	217.364	0.709653	0.135324	-5.24411	1.57041e-07	2.90283e-05
JAK2	1377.58	0.919497	0.175786	-5.23079	1.68791e-07	3.07669e-05
MIF	2329.35	0.568382	0.109173	-5.20627	1.92669e-07	3.46382e-05
GAPDH	20853.7	0.481171	0.0927332	-5.18877	2.1169e-07	3.74311e-05
GPR84	16.1032	1.21836	0.234896	-5.18683	2.13909e-07	3.74311e-05
AGTRAP	310.427	0.639604	0.123557	-5.1766	2.25967e-07	3.85142e-05
ODF3B	70.6828	0.971722	0.187714	-5.1766	2.25966e-07	3.85142e-05
TNFAIP8	298.988	0.742096	0.144315	-5.14219	2.71551e-07	4.56903e-05
COL7A1	1509.8	0.773983	0.150867	-5.13024	2.89377e-07	4.80732e-05
TNFAIP2	890.409	1.09716	0.214014	-5.12658	2.95048e-07	4.84025e-05
LAMB3	162.095	0.996361	0.194474	-5.12337	3.0012e-07	4.86268e-05
ALDH1A3	614.244	-0.855329	0.167963	5.09236	3.53636e-07	5.6599e-05
FAM132B	37.0947	1.11648	0.220574	-5.06173	4.15474e-07	6.5695e-05
TP53INP1	629.05	-0.548088	0.108432	5.05466	4.31161e-07	6.73638e-05
DRAM1	926.114	0.89899	0.178301	-5.04197	4.60763e-07	7.11419e-05
ALDOA	9892.94	0.558573	0.111037	-5.03052	4.89153e-07	7.42494e-05
PDK1	199.071	0.571221	0.113578	-5.02933	4.92205e-07	7.42494e-05
SEMA4B	464.611	0.606069	0.120885	-5.0136	5.3422e-07	7.96716e-05
BEST1	266.566	0.765847	0.153724	-4.98195	6.29471e-07	9.20913e-05
IL6	1069.83	1.10646	0.222123	-4.98132	6.31531e-07	9.20913e-05
INHBA	942.632	0.814675	0.164252	-4.95992	7.05217e-07	0.000100305
IQSEC2	377.462	0.524851	0.105813	-4.96019	7.04249e-07	0.000100305
WNT5A	3480.13	0.633412	0.127745	-4.95839	7.10786e-07	0.000100305
ANKRD44	186.425	-0.705837	0.142692	4.94657	7.55317e-07	0.000105455
ENPP2	3801.32	1.06696	0.215878	-4.94243	7.71536e-07	0.000106586
C1RL	1264.1	0.637051	0.129169	-4.93194	8.1417e-07	0.000111304
CHSY1	1296.62	-0.475321	0.0964503	4.92815	8.30114e-07	0.000112314
GSN-AS1	450.959	-0.625929	0.127091	4.92504	8.4341e-07	0.000112948
DYNC2H1	1175.69	0.537273	0.111757	-4.80752	1.52816e-06	0.000202015
IKBKE	149.594	0.748011	0.155639	-4.80607	1.53928e-06	0.000202015
SUSD6	951.789	0.624785	0.131124	-4.76484	1.89006e-06	0.000245596
RGAG4	324.394	-0.801527	0.168785	4.74881	2.04619e-06	0.000261837
TMEM132A	1026.58	0.936646	0.197274	-4.74794	2.05495e-06	0.000261837
CFAP69	183.224	0.901872	0.191229	-4.7162	2.40296e-06	0.000303235
TRAF3	528.369	0.431253	0.0923021	-4.67219	2.98001e-06	0.000372472
EPHA3	230.388	-0.899236	0.19273	4.66577	3.07458e-06	0.000373618
NPAS2	176.181	0.800633	0.171491	-4.66867	3.03155e-06	0.000373618
SLC30A1	522.682	0.679525	0.14563	-4.66612	3.06936e-06	0.000373618
SLC15A3	177.273	0.573407	0.123339	-4.64903	3.335e-06	0.000401546
IRF1	523.723	0.669302	0.144587	-4.62905	3.6734e-06	0.00043827
BDKRB2	876.829	0.7576	0.163985	-4.61994	3.83848e-06	0.000453839
BIRC3	218.271	1.07756	0.233509	-4.61465	3.93752e-06	0.000461393
BNIP3	627.786	0.522693	0.114152	-4.57893	4.67368e-06	0.000542808
IL6ST	6365.76	0.516751	0.113045	-4.57121	4.8491e-06	0.000557711
NNMT	3913.9	0.577736	0.126431	-4.56958	4.88698e-06	0.000557711
IL11	268.639	1.01047	0.221256	-4.56696	4.94859e-06	0.000559874
TPCN1	1090.16	0.412904	0.0907779	-4.5485	5.40285e-06	0.000606043
RAP2B	791.088	-0.489019	0.108043	4.52617	6.00626e-06	0.000668019
DMXL2	483.93	0.538222	0.118965	-4.5242	6.06243e-06	0.000668599
CHST11	585.585	0.968863	0.215068	-4.50491	6.63998e-06	0.000726192
TNFAIP3	1312.68	1.01751	0.226457	-4.49316	7.01741e-06	0.000761128
GALNT2	2887.05	0.419697	0.0936403	-4.48201	7.39435e-06	0.000795438
CCL7	51.5546	1.05156	0.235501	-4.46523	7.99836e-06	0.000853419
PNKD	314.607	0.825426	0.185189	-4.45721	8.30344e-06	0.000878825
MMP9	16.6097	1.03918	0.23376	-4.4455	8.76881e-06	0.000920655
ID1	250.424	-0.914847	0.206302	4.4345	9.22849e-06	0.000952968
LINC00982	52.008	-0.985741	0.22245	4.43129	9.36703e-06	0.000952968
NEDD4	735.92	0.647394	0.146017	-4.43369	9.26334e-06	0.000952968
STEAP1	1022.68	0.755922	0.17056	-4.43201	9.33599e-06	0.000952968
ANGPT1	2186.14	0.843338	0.190915	-4.41734	9.99221e-06	0.00100875
KIAA0368	1420.29	0.291713	0.0663153	-4.39889	1.08808e-05	0.00109007
MIF-AS1	2281.54	0.552007	0.12666	-4.35818	1.3115e-05	0.00130395
DENND5A	1413.54	0.303309	0.0697903	-4.346	1.38642e-05	0.00136807
TMEM165	1332.33	0.454402	0.104629	-4.34297	1.40569e-05	0.00137673
SNX9	2469.49	-0.450719	0.103951	4.33586	1.45189e-05	0.00141145
COL3A1	116268	0.885096	0.204675	-4.32439	1.52952e-05	0.00147598
ZC3H12A	699.175	0.930753	0.215934	-4.31036	1.62986e-05	0.00156133
SCARB1	137.694	0.871849	0.202652	-4.30219	1.69117e-05	0.00160833
HSP90B2P	112.402	0.816637	0.191031	-4.27489	1.91234e-05	0.00180558
ID3	382.639	-0.789522	0.184814	4.27199	1.93737e-05	0.00181614
ACO1	1313.38	0.783956	0.184359	-4.25234	2.11548e-05	0.00196905
CEBPD	958.712	0.611934	0.14429	-4.241	2.22522e-05	0.0020566
ITGB5	11136	-0.482225	0.113832	4.2363	2.27237e-05	0.00208549
LDHA	6474.34	0.395963	0.0939084	-4.21648	2.4814e-05	0.00224592
NDRG1	3382.57	0.82075	0.194587	-4.21792	2.46571e-05	0.00224592
RTN4RL2	78.4826	0.960251	0.227876	-4.21392	2.50974e-05	0.00225601
QSOX1	5302.49	0.745427	0.177688	-4.19515	2.72696e-05	0.0024346
STEAP2	1357.4	0.886576	0.211638	-4.18912	2.8004e-05	0.00248328
SLC16A7	595.31	0.766721	0.183321	-4.18239	2.8846e-05	0.00254077
MFSD2A	152.79	0.980228	0.23515	-4.16852	3.06589e-05	0.00268245
PPP2R5A	393.15	-0.364157	0.0874555	4.16391	3.12838e-05	0.002719
ZFP90	358.27	-0.420496	0.101156	4.15691	3.22577e-05	0.0027852
MARCH3	50.6107	0.955161	0.23054	-4.14314	3.42575e-05	0.00293854
PLD1	333.633	0.954803	0.231099	-4.13158	3.60272e-05	0.00307027
DUSP8	67.7782	0.928113	0.225305	-4.11936	3.79929e-05	0.00319627
ENTPD7	336.099	0.448704	0.108923	-4.11946	3.79759e-05	0.00319627
FYN	1484.99	0.562845	0.137134	-4.10434	4.05463e-05	0.00338936
RCL1	259.41	0.76718	0.187576	-4.08997	4.31428e-05	0.00358358
KAZALD1	154.909	-0.706003	0.17293	4.08259	4.45365e-05	0.00367608
ACSL1	531.83	0.602425	0.147786	-4.07634	4.57501e-05	0.00375265
SLC11A2	792.743	0.503538	0.124143	-4.05611	4.98974e-05	0.00406741
NFKB1	469.33	0.434614	0.107297	-4.05055	5.10964e-05	0.00413944
WDR47	297.113	-0.408984	0.101023	4.04844	5.15602e-05	0.00415139
TNFAIP6	2234.57	0.866658	0.214562	-4.0392	5.36336e-05	0.00429199
ALDH7A1	689.197	-0.411138	0.102111	4.02636	5.66463e-05	0.00447847
KIFC3	404.117	0.481088	0.11947	-4.02685	5.65302e-05	0.00447847
UCN2	17.1623	0.928283	0.231801	-4.00466	6.21058e-05	0.0048807
TRAF2	116.442	0.540944	0.135267	-3.99908	6.35885e-05	0.00496747
CA9	34.04	0.909442	0.228507	-3.97993	6.89343e-05	0.00535322
DCBLD1	237.931	0.555543	0.139988	-3.96851	7.23222e-05	0.00558328
LAMB2	6077.19	0.31303	0.0789574	-3.96454	7.35374e-05	0.0056436
LOC100132891	522.79	0.70749	0.178517	-3.96316	7.39636e-05	0.0056436
IL4R	739.946	0.378628	0.0955793	-3.9614	7.45122e-05	0.00565259
CLEC3B	39.9842	-0.90787	0.230292	3.94225	8.07202e-05	0.00605356
WISP1	613.439	0.777327	0.197166	-3.9425	8.06365e-05	0.00605356
NCSTN	1738.2	0.504305	0.128217	-3.9332	8.38216e-05	0.00625042
ERI1	170.497	-0.507743	0.129837	3.91062	9.20596e-05	0.00682593
STAT4	52.9095	0.904162	0.23193	-3.89843	9.68191e-05	0.00713851
HSP90B1	12771.6	0.59039	0.151872	-3.88742	0.000101315	0.00742825
ANKH	5986.85	-0.667534	0.172226	3.87593	0.000106219	0.00774453
ZCCHC2	248.195	0.750568	0.193818	-3.87254	0.000107706	0.0078096
FSTL1	14500.3	0.572623	0.14822	-3.86334	0.000111848	0.00806381
VASN	3243.93	0.53115	0.137531	-3.86205	0.000112441	0.00806381
RGL1	795.302	-0.357952	0.0933245	3.83556	0.000125277	0.00888897
SELM	1211.45	0.350327	0.0913593	-3.83461	0.000125763	0.00888897
SLC43A3	762.292	0.819575	0.213754	-3.83419	0.000125979	0.00888897
FRMPD4	89.612	0.874946	0.229202	-3.81736	0.000134885	0.00946648
WTAPP1	476.655	0.737505	0.194409	-3.79358	0.000148488	0.0103658
SLC2A6	194.978	0.787561	0.207821	-3.78962	0.000150881	0.010477
IGF1	92.1422	0.873237	0.230947	-3.78111	0.00015613	0.0107845
LGALS3	2661.81	-0.279491	0.0739952	3.77715	0.000158633	0.0109
FZD4	477.53	-0.65848	0.174603	3.77129	0.000162407	0.0111012
ZC3H12C	375.876	0.520698	0.138255	-3.76622	0.000165737	0.0112701
UXS1	536.461	0.435517	0.115774	-3.7618	0.000168697	0.0114123
ADAM10	2231.07	-0.413544	0.110045	3.75794	0.000171315	0.01153
ADAMTS2	1587.23	-0.452939	0.120739	3.75139	0.00017586	0.0117156
GLIS3-AS1	57.9308	0.656527	0.174958	-3.75249	0.00017509	0.0117156
IGDCC4	362.8	0.642415	0.171477	-3.74636	0.000179417	0.0118923
SESN3	725.018	-0.810454	0.216569	3.74225	0.000182379	0.0120278
FILIP1L	384.328	0.611873	0.163702	-3.73773	0.00018569	0.012185
PDCD5	299.667	0.357604	0.095905	-3.72873	0.000192447	0.0125656
TNFSF10	111.728	0.877368	0.235472	-3.72599	0.000194546	0.0126397
PDXK	1171.66	0.346393	0.0934861	-3.70529	0.000211148	0.0136508
FCHSD2	839.004	0.320929	0.086715	-3.70096	0.000214782	0.0137502
ITGB8	788.195	0.623994	0.168584	-3.70138	0.000214426	0.0137502
IL32	30.1259	0.811557	0.21971	-3.69377	0.000220953	0.0140766
IL4I1	57.1515	0.86729	0.235392	-3.68446	0.00022919	0.0145309
PDE7B	868.748	0.521465	0.14163	-3.68188	0.000231519	0.014608
LMOD1	290.891	-0.635373	0.172702	3.67902	0.000234129	0.0146952
SPRY1	460.74	-0.697981	0.189776	3.67792	0.000235141	0.0146952
SESTD1	695.977	-0.343802	0.0935863	3.67363	0.000239125	0.0148733
CEBPB	2448.49	0.661193	0.180257	-3.66805	0.000244404	0.01513
MESDC2	1046.64	0.535734	0.146205	-3.66427	0.000248041	0.0152288
OSBPL3	405.176	-0.629423	0.171786	3.66399	0.00024832	0.0152288
PIM1	694.927	0.432375	0.118156	-3.65936	0.000252848	0.0154343
PSMB10	248.017	0.451789	0.12371	-3.652	0.000260211	0.0157374
TTLL4	195.831	0.52378	0.143413	-3.65224	0.000259961	0.0157374
ARHGAP24	482.52	-0.564453	0.154885	3.64434	0.000268079	0.0161388
LIF	4200.68	0.853372	0.235477	-3.62401	0.000290071	0.0173591
SCN1A	38.1181	0.851969	0.235143	-3.62319	0.000290993	0.0173591
CANX	7934.16	0.293812	0.0811515	-3.62053	0.000293995	0.0174588
GCHFR	39.2889	0.768877	0.212878	-3.61182	0.000304059	0.0179751
TAF7	735.89	-0.294827	0.0816606	3.61039	0.000305732	0.017993
CFLAR	1141.92	0.71504	0.198319	-3.60551	0.000311546	0.0182532
PTX3	3165.16	0.833257	0.231242	-3.6034	0.000314078	0.0183198
PKIB	17.4142	0.846818	0.235249	-3.59967	0.000318621	0.0185026
FILIP1	30.67	0.824316	0.229394	-3.59345	0.000326334	0.018867
CYLD	729.718	0.308152	0.0859306	-3.58606	0.000335718	0.0193244
SMAD6	313.486	-0.561338	0.156782	3.58037	0.000343105	0.0196633
GPI	2482.23	0.461253	0.128912	-3.57806	0.00034616	0.0197522
C1RL-AS1	314	0.487482	0.136378	-3.5745	0.000350898	0.0198205
CEBPB-AS1	1129.02	0.683469	0.191246	-3.57376	0.000351888	0.0198205
SLC44A1	1841.58	-0.336054	0.09401	3.57466	0.000350685	0.0198205
ATOH8	64.215	-0.702113	0.196834	3.56702	0.000361058	0.0202501
CKB	41.8218	-0.81674	0.229348	3.56113	0.000369258	0.0205345
MMP1	1776.39	0.671529	0.188547	-3.5616	0.000368608	0.0205345
PTPRK	1822.02	0.22535	0.0633272	-3.5585	0.000372977	0.0206538
CLDN1	16.7528	0.837379	0.23545	-3.55651	0.00037582	0.0207238
KLHL41	14.7895	-0.833941	0.234911	3.55004	0.000385179	0.021151
MT2A	1713.87	0.774731	0.219408	-3.53101	0.000413975	0.0226375
SECTM1	166.858	-0.639411	0.181249	3.52781	0.000419021	0.0228184
PTPN2	251.061	0.67571	0.191776	-3.52343	0.000426003	0.0231028
EDARADD	150.971	0.553397	0.157126	-3.522	0.000428306	0.023132
PANX1	475.11	0.466205	0.132514	-3.51815	0.000434566	0.0233739
NAA38	291.151	0.441457	0.125674	-3.51272	0.000443539	0.0237592
GSN	5463.25	-0.572709	0.163213	3.50896	0.000449859	0.0239998
FAM63B	550.921	-0.514427	0.146747	3.50553	0.000455705	0.0242132
INPP4B	119.546	-0.625577	0.178865	3.49749	0.000469666	0.0248544
ARMC9	657.071	-0.698502	0.199831	3.49546	0.000473252	0.0249436
CNTNAP1	969.859	0.49982	0.143452	-3.48424	0.000493539	0.0251615
EFNB2	227.336	0.817258	0.234554	-3.48431	0.000493405	0.0251615
FGF11	39.1741	0.802292	0.230292	-3.48381	0.000494329	0.0251615
GLIPR2	190.94	-0.58351	0.1675	3.48364	0.000494642	0.0251615
LOC101929319	268.404	0.718798	0.206314	-3.484	0.000493973	0.0251615
MCC	653.353	0.519823	0.148923	-3.49054	0.000482046	0.0251615
PLOD1	4444.23	0.569708	0.163465	-3.48519	0.000491786	0.0251615
RAB11FIP1	61.8758	0.801285	0.229651	-3.48915	0.000484562	0.0251615
SLC25A5-AS1	292.736	0.488113	0.139926	-3.48836	0.000485995	0.0251615
FAIM3	48.6684	0.679349	0.195209	-3.48012	0.000501192	0.0253963
EML4	850.444	-0.306402	0.0881746	3.47495	0.000510958	0.0256994
TRAF3IP2	434.334	0.694175	0.19977	-3.47488	0.000511089	0.0256994
GPR176	1122.74	0.606038	0.174544	-3.47212	0.000516358	0.0257897
ZMAT3	3104.88	-0.332972	0.0959052	3.47189	0.000516816	0.0257897
IRAK2	221.48	0.651579	0.188162	-3.46286	0.000534472	0.0264695
SESN1	265.157	-0.384052	0.11089	3.46335	0.000533499	0.0264695
WDR86	246.095	0.811356	0.234448	-3.46071	0.000538745	0.0265808
CTGF	8016.64	-0.456845	0.132366	3.45139	0.000557715	0.0273507
SPRED1	1512.23	-0.47801	0.138514	3.451	0.000558518	0.0273507
SLC26A6	198.493	0.535358	0.155315	-3.44692	0.000567012	0.0276634
BRPF3	593.12	0.283455	0.0824339	-3.43857	0.000584793	0.0284253
TMEM45A	383.861	0.393004	0.114335	-3.4373	0.000587541	0.0284535
LOC100130744	767.877	-0.569277	0.16577	3.43414	0.000594431	0.0286813
HYOU1	2164.9	0.576166	0.168025	-3.42904	0.000605715	0.0291187
NTN4	314.4	-0.445762	0.130129	3.42554	0.000613571	0.0293887
SLC14A1	3567.58	-0.798323	0.233306	3.42179	0.000622102	0.029689
ROR1	347.297	-0.545011	0.159559	3.41573	0.000636112	0.0302476
AKR1B1	1876.66	0.720675	0.211321	-3.41034	0.000648826	0.0307408
ENDOD1	565.288	-0.529841	0.155506	3.4072	0.000656332	0.0308735
TIFA	120.186	0.531369	0.155928	-3.40779	0.000654916	0.0308735
CA12	5841.72	0.758677	0.223072	-3.40104	0.00067131	0.0313718
SLC25A37	398.247	0.528147	0.155298	-3.40087	0.000671708	0.0313718
CYTH3	797.823	-0.591355	0.174577	3.38735	0.000705701	0.0327266
RIPK2	238.278	0.495382	0.146209	-3.38818	0.00070357	0.0327266
IER5L	860.202	-0.590048	0.174414	3.38303	0.000716916	0.0330942
SAMD11	211.718	-0.60326	0.178355	3.38236	0.000718672	0.0330942
CDK5RAP2	1847.35	0.308796	0.0916361	-3.3698	0.000752215	0.0340979
NDUFA4L2	164.323	0.776519	0.230466	-3.36935	0.000753458	0.0340979
SOCS5	1258.61	-0.487273	0.144502	3.37208	0.000746016	0.0340979
SPAG4	58.4946	0.700056	0.207543	-3.37307	0.000743363	0.0340979
WWC1	98.694	0.792741	0.235259	-3.36965	0.000752628	0.0340979
WDR26	1894.66	-0.321773	0.0955708	3.36686	0.0007603	0.0342893
PLXDC2	1393.5	-0.759037	0.225599	3.36455	0.000766698	0.0344594
PC	568.356	0.33434	0.0996457	-3.35529	0.000792814	0.0355116
C16orf45	893.356	-0.338025	0.100845	3.35193	0.000802508	0.0358235
CTSS	161.698	0.782738	0.235345	-3.32591	0.000881289	0.0392069
EPAS1	6921.36	0.65399	0.196713	-3.32459	0.000885483	0.0392604
KCNK15	1633.36	-0.651075	0.19605	3.32097	0.00089705	0.0396393
CEMIP	9570.8	0.741684	0.223841	-3.31344	0.000921544	0.0405851
SAMHD1	379.65	-0.397234	0.119927	3.31229	0.000925357	0.0406167
PHC2	2071.44	0.454331	0.13768	-3.2999	0.000967209	0.0422285
USB1	299.18	0.402244	0.12191	-3.29952	0.000968514	0.0422285
SIRPA	798.614	0.527972	0.160335	-3.29293	0.000991491	0.0430872
RILP	141.147	0.429046	0.130521	-3.28718	0.00101196	0.0438317
PDIA4	3843.68	0.528203	0.161146	-3.27779	0.00104624	0.0451672
DENND4C	608.397	-0.250666	0.0765304	3.27538	0.00105519	0.0454043
XBP1	1748.95	0.385563	0.117989	-3.26778	0.00108393	0.0464884
CCDC57	254.127	0.487347	0.149187	-3.2667	0.00108809	0.0465151
UGGT2	754.9	0.50433	0.154526	-3.26373	0.00109956	0.0468528
PHLDB2	645.456	-0.439046	0.134571	3.26256	0.00110411	0.0468942
PRKAR2A	323.289	-0.371178	0.114381	3.2451	0.0011741	0.0497059
MAP1LC3A	398.41	0.402043	0.124119	-3.23916	0.00119882	0.0505893
PDK4	49.008	-0.684258	0.211555	3.23442	0.00121891	0.0512725
ZNF436-AS1	46.1364	-0.626352	0.19387	3.23079	0.0012345	0.0517621
IL34	116.592	0.734286	0.227589	-3.22637	0.00125372	0.0524008
CPD	2150.56	0.588691	0.182705	-3.22208	0.00127261	0.0528538
MAPRE2	550.104	-0.377578	0.117184	3.22211	0.00127249	0.0528538
UPP1	254.575	0.452164	0.140743	-3.21268	0.00131501	0.0544423
BDKRB1	187.01	0.739715	0.23112	-3.20057	0.00137156	0.0566051
UACA	1384.9	-0.523139	0.163551	3.19864	0.00138079	0.0568072
ABCC4	426.706	0.370145	0.115866	-3.19458	0.00140033	0.0574312
GALM	185.435	-0.389946	0.122433	3.18498	0.00144764	0.0591864
RIT1	300.363	-0.325688	0.102342	3.18235	0.00146084	0.0595405
PPP1R3B	206.605	-0.433807	0.136463	3.17894	0.00147813	0.0600588
GAB1	282.384	-0.465903	0.146988	3.16966	0.00152617	0.0618193
RALA	519.356	-0.374467	0.118328	3.16465	0.00155268	0.0626995
SEMA7A	823.077	0.460657	0.145666	-3.16241	0.00156469	0.0629907
MMP11	373.088	-0.743039	0.235231	3.15877	0.00158439	0.0635887
IGFBP3	4719.19	-0.681857	0.215956	3.15739	0.00159186	0.0636939
PLEKHF2	88.7016	-0.476491	0.151051	3.1545	0.00160772	0.0641328
C1QTNF9B	24.0873	-0.733366	0.233581	3.13967	0.0016914	0.0658418
CALU	7984.67	0.200846	0.0638661	-3.14479	0.00166205	0.0658418
LAMA3	871.136	-0.622642	0.198238	3.14089	0.00168436	0.0658418
MYO1E	1715.21	-0.554145	0.176478	3.14003	0.00168932	0.0658418
RNF144B	67.8496	0.734828	0.234102	-3.13892	0.00169571	0.0658418
SCUBE1	18.6007	-0.717524	0.228545	3.13954	0.00169216	0.0658418
SLC25A28	193.694	0.442555	0.140972	-3.13932	0.00169341	0.0658418
TUBB3	1407.42	-0.393664	0.125383	3.13968	0.00169132	0.0658418
VEGFA	7964.92	0.543944	0.172946	-3.14516	0.00165996	0.0658418
RIN2	1081.05	-0.556556	0.177534	3.13493	0.00171895	0.0665471
HIC1	330.781	-0.70499	0.22513	3.13148	0.0017393	0.06694
TGFB3	309.948	-0.524852	0.167569	3.13216	0.00173526	0.06694
HIP1R	92.5339	-0.494529	0.158657	3.11697	0.00182718	0.0701166
ZCCHC14	1230.71	-0.407575	0.130811	3.11575	0.00183475	0.070202
APBA2	132.356	0.706863	0.227225	-3.11085	0.00186548	0.070555
APLN	37.5243	0.715965	0.230112	-3.11137	0.0018622	0.070555
CTNNA1	3172.16	-0.25177	0.0808729	3.11316	0.00185095	0.070555
DNAJB11	733.545	0.328873	0.105712	-3.11102	0.0018644	0.070555
ANKMY2	229.589	-0.404252	0.13013	3.10651	0.0018931	0.0713787
JADE1	342.995	-0.442961	0.142627	3.10572	0.00189814	0.0713787
KBTBD11	25.5361	-0.656941	0.211816	3.10147	0.00192563	0.0722056
IFNGR1	836.171	0.551063	0.178303	-3.0906	0.0019975	0.0746872
ATF5	227.612	0.475474	0.153914	-3.08922	0.0020068	0.0748215
ENC1	564.261	0.710499	0.230378	-3.08406	0.00204197	0.0758344
MSC	464.055	0.710812	0.230518	-3.08354	0.00204552	0.0758344
LAP3	653.361	0.295414	0.0959829	-3.07778	0.00208547	0.0769061
RGS4	696.892	-0.703869	0.228701	3.07769	0.00208615	0.0769061
YPEL1	117.722	-0.434056	0.141144	3.07527	0.00210312	0.0773146
DOCK10	554.611	-0.494738	0.161225	3.06862	0.00215053	0.0788367
CCT5	1134.1	0.217239	0.0708415	-3.06655	0.00216543	0.0789419
RBM47	63.4143	0.721809	0.235381	-3.06656	0.00216537	0.0789419
CASP4	326.481	0.370871	0.121024	-3.06443	0.00218082	0.0792493
NTHL1	100.621	0.492535	0.160763	-3.06373	0.00218594	0.0792493
HEXIM1	859.467	0.341613	0.111602	-3.06101	0.00220593	0.0797539
2007-09-01	1646.75	-0.282903	0.0924555	3.05989	0.0022142	0.0798329
NAB1	526.951	0.349873	0.114633	-3.05212	0.00227231	0.0817035
GLRX	396.238	0.580689	0.190436	-3.04927	0.00229401	0.0822585
FBXW5	1355.93	0.272719	0.0895111	-3.04676	0.00231324	0.0825183
IL17RA	467.434	0.612034	0.200939	-3.04587	0.00232012	0.0825183
TCF7	169.351	-0.68744	0.225643	3.04658	0.00231463	0.0825183
LDB2	356.834	-0.456101	0.149898	3.04273	0.00234439	0.0831562
PTGES	792.794	0.716136	0.235479	-3.04119	0.00235643	0.0833578
CSRNP3	101.296	-0.621897	0.204583	3.03982	0.00236716	0.0835124
NFE2L1	4373.69	0.27589	0.0908386	-3.03715	0.0023883	0.0840323
PPFIA2	122.115	-0.682028	0.224795	3.03401	0.00241329	0.0846847
SMC6	291.738	-0.333027	0.109797	3.03312	0.00242041	0.0847079
LOXL3	939.848	0.449208	0.148228	-3.03052	0.00244131	0.0852121
FAM110B	262.312	0.501066	0.165427	-3.02892	0.00245432	0.0852139
WIPI1	986.372	0.270419	0.0892794	-3.02891	0.00245435	0.0852139
GATAD2B	351.228	-0.27553	0.0910315	3.02675	0.00247196	0.0855988
ADA	275.553	-0.644053	0.212977	3.02405	0.00249419	0.0861414
DEPTOR	32.8724	-0.653543	0.21624	3.0223	0.00250863	0.0862544
ENO1	8679.23	0.393346	0.130158	-3.02206	0.0025106	0.0862544
HILPDA	95.218	0.660734	0.218837	-3.0193	0.00253359	0.0865956
PIK3CD	309.719	0.519169	0.171951	-3.01928	0.00253373	0.0865956
LOC100506178	27.1541	0.684133	0.226665	-3.01825	0.00254238	0.0866656
DACT3	73.3407	-0.626325	0.208057	3.01035	0.00260948	0.0887223
SSFA2	1682.77	-0.462476	0.153747	3.00803	0.00262948	0.0891714
PTMA	5114.44	0.290922	0.0967825	-3.00593	0.00264768	0.0895571
FAM84A	135.678	-0.66712	0.222039	3.00451	0.00266005	0.0897441
LINC00987	77.2438	0.536253	0.178619	-3.00223	0.00268013	0.0901898
CRY1	208.427	-0.350199	0.116735	2.99995	0.00270024	0.0906343
GGT7	608.677	0.323052	0.10773	-2.99873	0.00271109	0.0907662
HIVEP3	208.624	0.491397	0.164165	-2.99331	0.00275971	0.0921588
PDCD10	248.697	-0.309169	0.103448	2.98865	0.00280215	0.0933386
NETO2	656.058	-0.564103	0.188952	2.98543	0.00283176	0.0940862
AZI2	656.385	0.367818	0.123312	-2.98283	0.00285599	0.0941259
COL24A1	103.264	0.63004	0.211265	-2.98222	0.00286164	0.0941259
NEK1	366.816	-0.268906	0.0901484	2.98293	0.00285507	0.0941259
PPIF	583.553	0.664615	0.222856	-2.98227	0.00286123	0.0941259
NKX3-1	70.8525	0.640876	0.214991	-2.98095	0.00287356	0.0942816
JMJD1C	919.43	-0.230582	0.0773769	2.97999	0.00288261	0.0943426
MID1	765.705	0.396221	0.133153	-2.97569	0.00292334	0.0952008
RASD1	1545.51	0.675907	0.2271	-2.97625	0.002918	0.0952008
FXYD1	29.1428	-0.697522	0.234484	2.97471	0.00293269	0.0952689
DNAJC3	1462.99	0.326019	0.10967	-2.97272	0.00295169	0.0956494
OSBPL6	108.645	-0.583255	0.196476	2.96858	0.00299182	0.0967108
FAM134C	436.75	-0.26176	0.0882236	2.96701	0.00300708	0.0969655
PNPLA2	947.905	0.305659	0.103062	-2.96577	0.00301927	0.0971199
CHST12	298.972	0.294851	0.0994681	-2.96428	0.0030339	0.0973519
PDK3	248.271	0.627413	0.21174	-2.96313	0.00304531	0.0974796
SPAG9	1575.43	-0.204854	0.0691581	2.96211	0.00305535	0.097563
SVIL-AS1	1029.46	-0.324854	0.109708	2.96109	0.00306553	0.0976507
GMDS	558.736	0.461778	0.156149	-2.95729	0.00310359	0.0986237
GBP2	615.808	0.346558	0.117634	-2.94607	0.00321836	0.102024
METRNL	822.275	0.412815	0.140352	-2.94129	0.00326852	0.102868
SH3BGRL	1635.75	-0.273466	0.0929692	2.94147	0.00326659	0.102868
ST8SIA1	325.824	-0.6638	0.225593	2.94246	0.00325616	0.102868
C1QL1	20.1719	0.668245	0.22746	-2.93786	0.00330488	0.103764
KIF21A	86.8622	0.47214	0.160752	-2.93706	0.00331336	0.103782
LYN	69.3783	0.65071	0.221729	-2.9347	0.00333866	0.104325
AHRR	801.756	-0.567191	0.193471	2.93166	0.00337161	0.104855
ZFP14	82.551	-0.504219	0.171991	2.93167	0.00337149	0.104855
MAT2A	2777.97	-0.262867	0.0897413	2.92916	0.0033988	0.10531
PENK	182.998	-0.587309	0.200576	2.92811	0.0034103	0.10531
SLC40A1	1217.74	-0.687458	0.234758	2.92837	0.0034074	0.10531
DCN	24778.7	0.654821	0.223837	-2.92544	0.00343974	0.105782
RPL19P12	148.118	0.429582	0.146853	-2.92526	0.00344172	0.105782
SEPW1	318.468	-0.353104	0.120767	2.92384	0.00345738	0.106016
BROX	468.025	-0.265685	0.0910166	2.91908	0.00351066	0.107398
HDGF	2142.71	0.256127	0.0878122	-2.91676	0.00353685	0.107948
SMAD9	134.588	-0.629652	0.216001	2.91504	0.00355648	0.108295
SCN1B	152.587	-0.475683	0.163469	2.90992	0.00361517	0.109828
LINC00152	134.281	0.504183	0.173334	-2.90874	0.00362887	0.109989
CPM	119.707	0.548711	0.188725	-2.90746	0.00364372	0.110185
AK3	1187.66	0.335278	0.115385	-2.90572	0.00366411	0.110547
TUBA1A	3446.16	-0.438802	0.151343	2.89938	0.00373901	0.112548
SEL1L3	1311.71	0.678289	0.234999	-2.88635	0.0038974	0.117047
S1PR3	448.753	0.677582	0.23499	-2.88345	0.00393346	0.117788
SRGN	2281.03	0.644686	0.223622	-2.88292	0.00394004	0.117788
BCL6	1315.47	0.399486	0.138639	-2.88149	0.00395798	0.118056
EPS8	1444.43	-0.22306	0.0776603	2.87225	0.00407558	0.121288
EMID1	119.041	0.661709	0.230935	-2.86535	0.00416551	0.123684
SLC38A3	41.0041	0.65296	0.227992	-2.86396	0.00418386	0.123948
CCDC71L	504.832	0.524397	0.183338	-2.86028	0.00423266	0.125005
MAGI3	135.025	-0.371366	0.129888	2.85913	0.0042481	0.125005
SH3RF2	68.6291	0.64555	0.225762	-2.85943	0.00424404	0.125005
TGFBR3	1220.16	-0.400524	0.140148	2.85787	0.00426493	0.125219
FLOT2	843.504	0.220685	0.0773814	-2.85191	0.0043458	0.127309
LINC01547	72.1858	0.665942	0.23364	-2.8503	0.00436787	0.12767
IL17RD	177.942	-0.616545	0.216516	2.84758	0.00440533	0.128479
FAM102B	300.574	-0.449038	0.157743	2.84665	0.00441825	0.12857
STRN	501.841	-0.261242	0.0920741	2.8373	0.00454962	0.1321
SLC52A2	584.625	0.242977	0.0858363	-2.8307	0.00464463	0.134561
ENO2	706.549	0.295287	0.104435	-2.82748	0.0046916	0.135622
SMOX	894.079	0.501211	0.177352	-2.82608	0.00471219	0.135918
DLX5	111.465	-0.625572	0.221415	2.82533	0.00472315	0.135935
BTBD1	837.829	-0.27331	0.0967641	2.8245	0.00473544	0.135991
PEBP1	1869.38	-0.277762	0.0984041	2.82266	0.00476265	0.136177
TLR2	43.9743	0.640043	0.226703	-2.82326	0.00475375	0.136177
MCM3	244.7	-0.304596	0.107962	2.82134	0.00478242	0.136445
EGLN1	638.272	0.35753	0.126845	-2.81863	0.00482294	0.137302
PDE4D	190.985	0.660613	0.234654	-2.81527	0.00487364	0.138032
POU2F2	254.311	0.659534	0.234303	-2.81488	0.00487953	0.138032
RASL10B	73.2107	0.600581	0.213362	-2.81484	0.00488015	0.138032
IGSF8	402.908	0.338294	0.120285	-2.81245	0.00491662	0.138765
SVIL	3251.05	-0.35286	0.125548	2.81055	0.00494571	0.139286
TP63	234.832	0.645004	0.229654	-2.8086	0.00497579	0.139834
RAB13	1343.37	0.408533	0.145517	-2.80745	0.00499351	0.140032
AKIRIN2	491.079	-0.361075	0.128766	2.80411	0.00504559	0.14089
JAGN1	219.326	0.320415	0.11425	-2.8045	0.00503942	0.14089
AGRN	2128.39	0.418342	0.149442	-2.79936	0.00512038	0.142675
CPEB2	820.844	-0.324545	0.116008	2.79762	0.00514814	0.143145
TSC22D3	401.176	-0.401758	0.143717	2.79547	0.0051824	0.143792
PRDX2	1141.51	0.321361	0.115142	-2.79101	0.00525438	0.145482
ALDH2	160.071	-0.496853	0.178117	2.78947	0.00527944	0.145868
PRR16	270.486	0.436827	0.156652	-2.78852	0.00529492	0.145988
DGKD	214.146	0.386141	0.138632	-2.78537	0.00534672	0.147108
RNF144A	544.565	-0.513341	0.184504	2.78227	0.00539798	0.148207
KCTD12	2716.61	-0.609723	0.219372	2.7794	0.00544587	0.148281
KMT2E	1335.73	-0.210659	0.0757589	2.78065	0.00542501	0.148281
PHPT1	924.442	0.29058	0.104547	-2.77942	0.00544561	0.148281
SPRY4	860.597	-0.436242	0.156878	2.78077	0.00542295	0.148281
PDE4B	188.317	0.562525	0.202618	-2.77628	0.00549849	0.149404
VPS39	924.727	-0.201046	0.072514	2.77252	0.00556245	0.15083
NLRC5	404.711	0.343038	0.123808	-2.77073	0.00559314	0.151349
CSF1	2723.95	0.448618	0.161954	-2.77004	0.00560493	0.151356
LRP12	587.305	-0.275808	0.0997906	2.76387	0.00571197	0.15393
CDX1	14.3186	0.634822	0.229928	-2.76096	0.0057631	0.154439
PER3	420.799	-0.349305	0.126492	2.76147	0.00575412	0.154439
PRRX2	362.86	-0.402637	0.145841	2.76079	0.00576618	0.154439
THUMPD1	444.831	-0.287886	0.104307	2.76	0.00578016	0.154499
IL15RA	16.9263	0.646605	0.23443	-2.7582	0.00581214	0.155038
BBOX1	15.8359	0.570543	0.207213	-2.75341	0.00589776	0.156685
CAMK2N1	1376.85	-0.510382	0.185321	2.75403	0.00588657	0.156685
PTS	190.434	0.417875	0.152063	-2.74803	0.00599545	0.158958
CILP2	340.226	-0.586932	0.213794	2.74531	0.0060454	0.159959
NPAS1	16.0271	-0.641898	0.234102	2.74196	0.00610739	0.161274
C10orf55	899.446	-0.347244	0.126833	2.73781	0.00618493	0.16267
WIPF1	2186.27	-0.56523	0.206454	2.73781	0.00618504	0.16267
MSR1	22.3844	-0.621312	0.22706	2.73633	0.00621289	0.16275
VCL	5617.75	-0.339642	0.124098	2.7369	0.00620218	0.16275
MAN1A1	1885.08	0.331306	0.121125	-2.73524	0.00623356	0.162967
CCDC69	167.424	0.613746	0.22487	-2.72934	0.00634611	0.165414
LINC00622	14.3218	0.639164	0.23421	-2.72902	0.00635237	0.165414
KCNK2	1128.62	-0.609258	0.223346	2.72787	0.00637448	0.165661
ZC2HC1A	264.054	-0.369967	0.135771	2.72493	0.00643149	0.166812
CCNL1	1467.91	0.406413	0.149234	-2.72332	0.00646296	0.167228
WISP3	140.565	0.405013	0.148749	-2.72281	0.006473	0.167228
ZBTB8A	177.781	-0.407663	0.149825	2.72093	0.00650983	0.167849
ARL4C	1964.36	-0.473926	0.174434	2.71694	0.00658891	0.16828
FAM65C	196.823	0.624545	0.229762	-2.71823	0.00656326	0.16828
RIC1	587.456	-0.192594	0.0708887	2.71685	0.00659067	0.16828
SERINC5	1026.17	-0.449089	0.165161	2.7191	0.00654597	0.16828
TSPAN11	1064.85	-0.593787	0.218497	2.71759	0.00657583	0.16828
DDX54	591.427	0.216017	0.0795523	-2.71541	0.00661938	0.168685
FOXC1	1371.78	0.531102	0.195735	-2.71337	0.00666026	0.169398
EPSTI1	438.189	0.536997	0.198011	-2.71196	0.00668876	0.169793
SEMA3A	118.8	-0.54759	0.202063	2.71	0.00672834	0.170469
AQP1	81.2062	-0.592685	0.218998	2.70635	0.00680272	0.171024
DNM3OS	298.499	-0.536847	0.198292	2.70736	0.006782	0.171024
MSH2	221.607	-0.315163	0.11644	2.70667	0.00679623	0.171024
RPN1	2772.77	0.258839	0.0957033	-2.7046	0.00683872	0.171024
RPS6KA1	84.3084	0.599818	0.221584	-2.70696	0.00679032	0.171024
TGFBR2	3673.06	-0.423635	0.156643	2.70446	0.0068415	0.171024
TGM2	1291.94	0.606814	0.224307	-2.70528	0.00682462	0.171024
RIMS4	165.509	-0.582122	0.215322	2.70349	0.00686148	0.171198
ZNF75D	156.751	-0.316434	0.117121	2.70176	0.00689744	0.171768
GPR108	486.862	0.330077	0.122232	-2.70042	0.00692515	0.172132
TOB1	641.18	-0.266203	0.0986309	2.69899	0.0069551	0.17255
RSPO3	37.2835	0.597103	0.221689	-2.69342	0.00707221	0.175124
IL17RC	535.303	0.256811	0.0957825	-2.68119	0.00733611	0.180976
TMEM205	177.315	0.347346	0.129536	-2.68147	0.00733006	0.180976
HEATR5A	491.96	-0.298452	0.111356	2.68016	0.00735879	0.181195
AK1	1182.92	-0.269415	0.100607	2.6779	0.00740844	0.182073
SPOP	522.475	-0.255157	0.0953044	2.67728	0.00742221	0.182073
KDM1B	195.951	-0.315403	0.117904	2.67509	0.00747097	0.182247
PIK3IP1	129.802	-0.592043	0.221266	2.67571	0.0074571	0.182247
TMEM126B	282.401	-0.285813	0.106828	2.67544	0.00746309	0.182247
BRCA2	38.9016	0.541289	0.202633	-2.67128	0.0075562	0.183984
C3AR1	16.8634	0.617322	0.231363	-2.66819	0.00762607	0.185342
MAFF	742.058	0.515704	0.193414	-2.66633	0.0076685	0.186029
ST6GALNAC6	1050.66	-0.206963	0.0776458	2.66547	0.00768797	0.186157
MROH8	290.092	0.408934	0.153528	-2.66358	0.00773147	0.186829
PVRL2	687.535	0.299603	0.112505	-2.66302	0.00774421	0.186829
ATP2C1	1402.01	0.449167	0.168807	-2.66083	0.00779493	0.187364
PFKFB2	129.404	-0.420251	0.15792	2.66117	0.00778703	0.187364
RAB24	323.097	0.334834	0.125939	-2.65869	0.00784447	0.18821
SNHG16	502.795	0.267891	0.100789	-2.65794	0.00786192	0.188284
UGCG	1262.68	0.54729	0.20604	-2.65623	0.0079019	0.188897
BCL3	671.441	0.433293	0.163455	-2.65085	0.00802906	0.191349
PDGFRA	13402.8	0.452469	0.170701	-2.65065	0.00803361	0.191349
CRELD2	593.659	0.36694	0.13889	-2.64195	0.00824301	0.195981
SPTLC2	601.034	-0.281739	0.10673	2.63974	0.00829704	0.196908
POLR3GL	171.907	-0.363851	0.137961	2.63735	0.00835572	0.197943
DNAJC1	365.926	0.243618	0.0924026	-2.63648	0.00837707	0.198091
A2M-AS1	51.198	-0.610694	0.231927	2.63313	0.00846029	0.19862
ACTA2	1651.63	-0.498289	0.189318	2.63202	0.00848791	0.19862
ETNK2	30.191	-0.561981	0.213425	2.63315	0.00845962	0.19862
FZD8	627.015	-0.566069	0.215078	2.63193	0.00849024	0.19862
GBE1	1364.04	0.352793	0.134035	-2.63209	0.00848613	0.19862
IKBIP	844.81	0.251256	0.0954575	-2.63213	0.00848523	0.19862
CBR4	133.39	-0.326778	0.124515	2.62441	0.00868	0.202479
GPR137	456.357	0.233061	0.0888133	-2.62417	0.00868605	0.202479
BMPR2	1439.01	-0.285502	0.10892	2.6212	0.00876202	0.203527
VPS37C	319.324	0.373265	0.142374	-2.62172	0.00874882	0.203527
IGFLR1	19.7745	0.599325	0.228942	-2.61781	0.00884972	0.204916
KIDINS220	1625.45	-0.242745	0.0927434	2.61739	0.0088606	0.204916
TMEM88	50.0331	0.609232	0.232791	-2.61708	0.00886866	0.204916
ALG3	237.036	0.309961	0.118608	-2.61332	0.0089667	0.205097
ASS1	950.608	0.578509	0.221383	-2.61316	0.00897086	0.205097
DHRS1	202.081	-0.326576	0.124928	2.61411	0.00894615	0.205097
DNAJB9	504.348	0.442493	0.169394	-2.61222	0.00899576	0.205097
GPR155	191.228	-0.381917	0.145997	2.61592	0.00889872	0.205097
PGD	2063.33	0.298003	0.114087	-2.61208	0.00899944	0.205097
POM121L9P	259.172	0.554848	0.212211	-2.6146	0.00893307	0.205097
PPM1K	121.873	-0.382254	0.146345	2.612	0.00900152	0.205097
COLGALT2	41.3348	-0.61444	0.23547	2.60942	0.00906956	0.206289
TNIK	97.131	0.613279	0.235221	-2.60724	0.00912743	0.207246
SAP30L-AS1	27.8507	-0.608245	0.233391	2.60613	0.00915727	0.207385
TBX3	615.012	0.498377	0.191254	-2.60583	0.00916513	0.207385
TMEM189	224.731	0.445887	0.171177	-2.60484	0.00919183	0.207631
DCK	169.089	-0.377714	0.145061	2.60383	0.00921882	0.207883
ARID4A	340.045	-0.264618	0.101749	2.60069	0.00930353	0.208424
CCDC6	679.421	-0.252653	0.0971521	2.60059	0.00930636	0.208424
PCDH19	109.609	-0.607886	0.233707	2.60106	0.00929368	0.208424
PLAU	2365.19	-0.378578	0.14551	2.60173	0.00927561	0.208424
ACTA2-AS1	745.708	-0.528619	0.203346	2.59961	0.00933309	0.208495
FAM225B	77.1898	-0.48486	0.186549	2.5991	0.00934672	0.208495
H19	19.4624	-0.552813	0.212725	2.59872	0.00935715	0.208495
KDM6B	1083.78	0.479392	0.184547	-2.59767	0.00938579	0.208778
KANK2	4071.32	-0.462733	0.178178	2.59703	0.00940343	0.208817
ELL2	1294.96	0.325093	0.12529	-2.59471	0.00946701	0.208916
NMI	161.506	0.441544	0.170182	-2.59455	0.00947158	0.208916
RABGAP1L	245.995	-0.322989	0.124429	2.59578	0.00943775	0.208916
RPN2	3650.1	0.418489	0.161251	-2.59526	0.00945183	0.208916
NCL	4169.84	0.143661	0.0554408	-2.59125	0.00956285	0.210575
EIF1B	529.924	0.424275	0.163889	-2.5888	0.00963119	0.211495
SOCS1	47.2035	-0.485655	0.187613	2.58859	0.00963685	0.211495
HTR2A	23.6324	0.529282	0.204618	-2.58668	0.00969042	0.21221
TMEM208	216.308	0.297091	0.114872	-2.58628	0.00970176	0.21221
RBM45	96.4585	-0.369186	0.142798	2.58538	0.00972726	0.212414
GINM1	971.476	0.370511	0.143374	-2.58423	0.00975969	0.212768
PDE5A	688.006	-0.556492	0.215416	2.58334	0.00978494	0.212964
FAM168B	1849.02	-0.164691	0.0638721	2.57845	0.0099246	0.214935
PTPRN	180.118	0.59708	0.231534	-2.5788	0.0099143	0.214935
SDHB	283.25	0.249644	0.0967955	-2.57909	0.00990619	0.214935
ABHD5	405.012	0.523609	0.203364	-2.57474	0.0100316	0.215305
ACYP1	38.6934	0.4964	0.192717	-2.57579	0.010001	0.215305
ATP1A1	3943.49	0.308007	0.119562	-2.57612	0.00999167	0.215305
HSPA5	10517.4	0.352872	0.136949	-2.57666	0.00997589	0.215305
KPNA1	607.088	-0.187815	0.0729698	2.57388	0.0100565	0.215305
PLCL1	53.516	0.498418	0.193613	-2.5743	0.0100444	0.215305
PPP1R15A	2668.87	0.276679	0.107468	-2.57452	0.0100378	0.215305
ERP44	624.999	0.227907	0.0887125	-2.56906	0.0101976	0.217969
PFKFB4	109.637	0.53376	0.207939	-2.5669	0.0102612	0.218972
UST	416.162	0.440049	0.171631	-2.56393	0.0103494	0.220495
CFLAR-AS1	69.89	0.54046	0.210953	-2.56199	0.0104074	0.221156
PDGFD	555.349	0.569117	0.222158	-2.56177	0.0104141	0.221156
LSM11	77.0639	-0.437085	0.170711	2.56039	0.0104555	0.221677
ATP5G2	895.682	0.244251	0.0954615	-2.55863	0.0105084	0.221725
PTGFR	2259.62	0.574828	0.224621	-2.5591	0.0104943	0.221725
SULF2	1805.8	0.594459	0.232252	-2.55954	0.010481	0.221725
AMOTL1	1490.53	-0.353035	0.138058	2.55716	0.0105531	0.222309
MRPL12	305.189	0.25063	0.0980643	-2.55577	0.0105952	0.222839
ATP6V0B	627.733	0.299518	0.117243	-2.55468	0.0106286	0.223183
NFE2L3	67.9001	0.516862	0.202454	-2.55298	0.0106805	0.223916
KCNJ15	268.043	0.573636	0.224816	-2.55159	0.0107234	0.224456
LOC113230	18.67	-0.590271	0.231986	2.54442	0.0109459	0.228749
GNPDA1	474.766	-0.405942	0.159728	2.54146	0.0110392	0.229966
SERPINB8	357.173	0.346058	0.136145	-2.54183	0.0110273	0.229966
VPS37B	472.327	-0.291669	0.114886	2.53877	0.0111244	0.231373
PRKAB2	348.537	-0.325306	0.128172	2.53805	0.0111473	0.231484
FAM96B	398.491	0.214414	0.0845197	-2.53686	0.0111852	0.231903
RHOBTB3	2567.3	-0.223814	0.0882783	2.53533	0.0112342	0.232552
TMEM8B	321.608	-0.253217	0.0999023	2.53464	0.0112562	0.232641
ANKRD28	1483.89	-0.373369	0.14738	2.53338	0.0112968	0.233112
SLC25A3	3209.68	0.172441	0.0680906	-2.53252	0.0113245	0.233317
GREM2	436.55	-0.583191	0.230655	2.52841	0.011458	0.235389
PDIA3	6150.47	0.370276	0.146451	-2.52832	0.0114609	0.235389
H2AFJ	325.671	0.28951	0.114786	-2.52216	0.0116635	0.239176
DSTN	3731.91	-0.238049	0.0945435	2.51788	0.0118065	0.241729
CRMP1	211.84	-0.281011	0.111642	2.51707	0.0118337	0.241909
TBL1XR1	1329.72	0.264873	0.105296	-2.51551	0.011886	0.2426
HSD17B10	294.01	0.307663	0.122468	-2.51219	0.0119986	0.244138
TRIM47	340.343	0.33727	0.13423	-2.51263	0.0119835	0.244138
ARAP3	151.4	0.507651	0.202399	-2.50817	0.0121359	0.24655
CRLF1	61.2636	-0.590156	0.235503	2.50594	0.0122128	0.247729
ATG16L2	244.993	0.444086	0.177341	-2.50414	0.0122749	0.248222
CMTM3	642.122	-0.388294	0.155045	2.5044	0.0122659	0.248222
MAP2K2	1360	0.161965	0.0646954	-2.50351	0.012297	0.248285
RRAD	1361.19	0.524269	0.209499	-2.50249	0.0123323	0.248615
PSMA6	476.947	0.204851	0.081922	-2.50056	0.0123998	0.249594
BAG4	249.198	-0.299964	0.120063	2.49839	0.0124757	0.249626
H2AFV	740.791	-0.256553	0.102689	2.49834	0.0124775	0.249626
MAP3K5	380.231	0.404393	0.161836	-2.49878	0.0124621	0.249626
PTPN13	2269.23	-0.223413	0.0893783	2.49963	0.0124323	0.249626
EMC10	1346.39	0.312682	0.125276	-2.49594	0.0125625	0.250585
RCN1	4391.84	0.356243	0.142731	-2.4959	0.0125636	0.250585
RGS2	1000.93	-0.493836	0.198112	2.49272	0.012677	0.252463
ADAMTS14	217.032	-0.58621	0.235374	2.49054	0.0127548	0.252782
AP2B1	2486.38	-0.215905	0.0866781	2.49089	0.0127425	0.252782
NCOR2	2975.64	0.332962	0.133735	-2.48972	0.0127845	0.252782
RASSF3	116.7	-0.492315	0.19775	2.48958	0.0127893	0.252782
TNFRSF1B	210.075	0.40887	0.164203	-2.49003	0.0127731	0.252782
RASL11A	93.7575	-0.522887	0.210257	2.48689	0.0128864	0.254318
SCLT1	87.0479	-0.446915	0.179785	2.48583	0.0129249	0.254694
FIBIN	1014.07	0.543111	0.218534	-2.48525	0.0129462	0.254731
CABIN1	816.715	-0.286759	0.115527	2.48217	0.0130584	0.255027
CREB5	116.377	-0.565081	0.227649	2.48225	0.0130556	0.255027
PDZD7	59.9208	-0.494524	0.199078	2.48407	0.0129892	0.255027
SLC38A5	159.384	0.525541	0.211702	-2.48246	0.0130479	0.255027
SMAD5	978.673	-0.216353	0.0871216	2.48334	0.0130156	0.255027
ADPGK	613.244	0.369644	0.149059	-2.47984	0.013144	0.256317
KCTD6	47.5836	-0.444399	0.179255	2.47914	0.0131699	0.256441
DUSP18	84.0704	-0.444344	0.179448	2.47617	0.01328	0.258202
ZFP30	92.2066	-0.373591	0.151006	2.47401	0.0133606	0.259386
TLE1	345.15	0.407469	0.164747	-2.4733	0.0133871	0.259515
RBL2	887.401	-0.203621	0.0823752	2.47187	0.0134408	0.260172
EXT2	2144.55	0.329912	0.133548	-2.47035	0.013498	0.260894
KIAA1377	222.397	-0.295865	0.119926	2.46706	0.0136229	0.262921
ATG14	336.297	-0.288551	0.117191	2.46223	0.0138077	0.265707
RAB12	445.683	-0.235962	0.0958283	2.46234	0.0138032	0.265707
P4HB	14058.3	0.415361	0.168731	-2.46168	0.0138288	0.265723
CNTN3	15.7619	0.530478	0.215585	-2.46064	0.0138688	0.265735
PKIG	1369.96	-0.384182	0.156132	2.46062	0.0138699	0.265735
MORC3	411.836	-0.251943	0.102443	2.45935	0.0139187	0.265894
PIM3	788.283	0.40345	0.16403	-2.45961	0.0139086	0.265894
ARAF	575.892	0.242606	0.0988509	-2.45426	0.0141173	0.266905
BRD4	937.929	0.200917	0.0818371	-2.45508	0.0140852	0.266905
CALR	15537.8	0.341747	0.139309	-2.45316	0.0141606	0.266905
CSGALNACT1	217.056	0.578177	0.235353	-2.45663	0.0140246	0.266905
DGKI	34.0911	0.577723	0.235374	-2.4545	0.0141083	0.266905
GAS6-AS1	2663.48	0.337636	0.137654	-2.4528	0.014175	0.266905
MGAT5B	24.6377	0.519891	0.211899	-2.45349	0.0141479	0.266905
PDIA6	4689.25	0.419204	0.170869	-2.45337	0.0141523	0.266905
PFKL	1674.65	0.248948	0.101343	-2.45649	0.0140303	0.266905
PHLDB3	161.498	0.432549	0.176292	-2.4536	0.0141435	0.266905
FMNL1	104.782	0.577003	0.235309	-2.45211	0.0142021	0.267033
PITPNM2	298.791	-0.316073	0.128929	2.45154	0.0142247	0.267075
DDHD2	464.732	-0.248844	0.101609	2.44904	0.0143238	0.268551
OXCT1	495.17	-0.363441	0.148644	2.44504	0.0144837	0.271162
ASL	246.3	0.344668	0.141095	-2.44281	0.0145734	0.272064
PLOD3	1539.02	0.335033	0.137125	-2.44326	0.014555	0.272064
C10orf54	336.374	0.574479	0.235338	-2.44109	0.0146432	0.272413
CD14	40.2506	0.574431	0.235492	-2.43928	0.0147166	0.272413
LOC101929415	60.439	-0.474324	0.19435	2.44057	0.0146641	0.272413
PXK	731.994	-0.283397	0.116172	2.43946	0.0147092	0.272413
2009-09-01	2613.02	-0.216951	0.0889218	2.4398	0.0146953	0.272413
SNX30	465.62	-0.348197	0.142626	2.44133	0.0146331	0.272413
SQRDL	422.895	0.333936	0.137054	-2.43652	0.0148294	0.274113
NLGN2	1186.11	0.185256	0.0760558	-2.43578	0.0148596	0.274286
SLC25A5	1188.03	0.295716	0.121449	-2.43489	0.0148964	0.274579
SEC22B	1443.67	0.209324	0.086016	-2.43354	0.0149519	0.275215
PTGS2	3449.55	0.549325	0.225876	-2.43197	0.0150168	0.276023
BNC1	86.0016	0.449876	0.185088	-2.43061	0.0150735	0.276291
IFFO1	388.45	-0.345496	0.142123	2.43097	0.0150586	0.276291
APOD	52.7513	-0.567131	0.233501	2.42881	0.0151483	0.276917
PALLD	2411.87	-0.297316	0.122414	2.42878	0.0151498	0.276917
CYP27A1	577.882	0.484009	0.199469	-2.42649	0.0152457	0.27796
TTLL11	45.7441	-0.456366	0.188083	2.42641	0.0152492	0.27796
ERO1L	740.167	0.276741	0.114078	-2.4259	0.0152705	0.277961
LINC00950	23.3324	-0.536307	0.221173	2.42483	0.0153156	0.278396
FABP5	22.8277	-0.538911	0.222355	2.42365	0.0153655	0.278774
LOC154761	17.7321	0.568433	0.234567	-2.42333	0.0153789	0.278774
AK4	278.13	0.465164	0.192129	-2.4211	0.0154737	0.279254
CTNNAL1	617.286	0.300131	0.124002	-2.42037	0.0155046	0.279254
MRAP2	30.7556	-0.550353	0.227272	2.42156	0.015454	0.279254
QPCTL	147.344	0.402741	0.166364	-2.42084	0.0154845	0.279254
SNCAIP	159.357	0.472446	0.195209	-2.4202	0.0155118	0.279254
ADAMTSL2	128.544	-0.566654	0.234612	2.41528	0.015723	0.27993
ATP1A1-AS1	996.506	0.294836	0.12194	-2.41787	0.0156117	0.27993
DSTYK	514.949	-0.272343	0.112756	2.41533	0.0157208	0.27993
EDF1	1564.11	0.213246	0.0882268	-2.41702	0.0156481	0.27993
GOLGA2	1685.2	0.197245	0.0815958	-2.41734	0.0156343	0.27993
JOSD1	734.622	-0.206924	0.0855953	2.41746	0.015629	0.27993
PARP4	1162.71	-0.168198	0.0696491	2.41494	0.0157378	0.27993
SERPINI1	258.928	-0.568716	0.235507	2.41486	0.0157412	0.27993
TMEM164	278.524	0.48958	0.202709	-2.41519	0.0157271	0.27993
ZNF408	123.83	-0.360789	0.149462	2.41392	0.0157817	0.28027
CARHSP1	455.686	-0.34385	0.142552	2.41211	0.0158606	0.280455
NOP14	442.07	0.222858	0.0923712	-2.41264	0.0158375	0.280455
SHB	243.027	0.485911	0.201479	-2.41172	0.0158776	0.280455
ZNF404	78.5808	-0.412747	0.171128	2.41192	0.015869	0.280455
GJD3	174.542	0.47525	0.197433	-2.40714	0.0160779	0.283229
PREX1	1275.15	0.328999	0.136663	-2.40738	0.0160672	0.283229
ADIPOR1	786.511	0.22716	0.0944166	-2.40593	0.0161312	0.283407
ATP5L	836.917	0.180579	0.0750479	-2.40618	0.0161205	0.283407
DSCR3	546.172	-0.233288	0.097076	2.40315	0.0162544	0.283895
FBXW2	693.216	-0.253179	0.105387	2.40238	0.0162887	0.283895
NHSL2	47.432	-0.563974	0.234671	2.40325	0.0162501	0.283895
SNAPC1	370.557	0.316366	0.131686	-2.40242	0.0162869	0.283895
TGFBR1	1576.58	0.358463	0.149208	-2.40245	0.0162859	0.283895
THEMIS2	107.041	0.44458	0.184904	-2.40439	0.0161997	0.283895
FBXO9	575.262	0.190589	0.0793565	-2.40168	0.0163199	0.284062
ARHGEF6	436.674	-0.28511	0.118841	2.39909	0.0164357	0.28524
EFTUD2	674.849	0.287984	0.120082	-2.39823	0.0164746	0.28524
ELP4	95.1018	-0.399759	0.166612	2.39934	0.0164245	0.28524
PLEKHF1	185.232	-0.512885	0.213824	2.39864	0.0164563	0.28524
EMC1	1233.14	0.325556	0.135909	-2.3954	0.0166022	0.285941
EMILIN1	14460.4	0.434248	0.181279	-2.39547	0.0165989	0.285941
PTP4A2	2555.21	0.265775	0.110904	-2.39645	0.0165547	0.285941
SNX7	556.126	-0.270639	0.112982	2.39541	0.0166017	0.285941
MXRA8	8665.25	-0.227415	0.095003	2.39377	0.0166764	0.286843
GAB2	277.938	0.32038	0.133973	-2.39138	0.0167853	0.287638
GALNT1	6779.87	0.482212	0.201652	-2.39131	0.0167884	0.287638
PLK2	955.471	0.40308	0.168523	-2.39184	0.0167643	0.287638
PRSS23	5119.19	-0.557037	0.233129	2.3894	0.0168759	0.288761
DCLK1	231.671	-0.520122	0.217735	2.38879	0.0169041	0.288866
SRP14	1878.41	-0.157823	0.0661013	2.3876	0.0169587	0.289423
LOC101927811	35.5431	0.466643	0.195533	-2.38652	0.0170088	0.289601
PDIA3P1	984	0.352575	0.147742	-2.38642	0.0170133	0.289601
ZFP69	30.9469	-0.494166	0.207158	2.38545	0.0170582	0.289989
BIN1	548.591	0.361753	0.151703	-2.38461	0.0170972	0.290276
ANKRD29	235.657	-0.534455	0.224312	2.38264	0.0171891	0.29146
AGPAT3	875.141	0.218371	0.0916728	-2.38207	0.0172155	0.291531
ADH5	1239.31	-0.266311	0.111856	2.38083	0.0172737	0.292139
EBF4	18.9148	0.540909	0.227297	-2.37974	0.0173247	0.292625
RNF11	1544.62	-0.256068	0.107789	2.37564	0.0175187	0.295521
CORO2B	500.593	-0.340686	0.143603	2.37241	0.0176725	0.297099
PCDHGC3	2858.66	-0.33952	0.143075	2.37301	0.0176438	0.297099
SFXN3	872.458	-0.329305	0.138816	2.37225	0.0176801	0.297099
PHF21A	651.177	0.218155	0.0919808	-2.37174	0.0177043	0.297125
C7orf43	159.637	0.306515	0.129387	-2.36899	0.0178367	0.297444
EXOC5	873.783	-0.17723	0.0747655	2.37047	0.0177653	0.297444
GLUD2	234.412	-0.329003	0.138844	2.36959	0.0178076	0.297444
PPARD	740.039	0.286131	0.120712	-2.37037	0.0177702	0.297444
TMEM132B	612.81	-0.557989	0.235496	2.36942	0.0178161	0.297444
DENND2D	48.8932	0.437199	0.184605	-2.3683	0.0178702	0.297585
EMX2OS	264.445	-0.385037	0.162673	2.36694	0.0179358	0.297585
HIF1A	8684.25	0.448892	0.189608	-2.36747	0.0179102	0.297585
NDUFA1	319.377	0.295224	0.124723	-2.36704	0.017931	0.297585
FLJ22447	29.8105	0.513575	0.217073	-2.3659	0.0179862	0.298044
ARPP19	1029.22	-0.247774	0.104759	2.36518	0.0180214	0.298251
LOC100130417	24.502	-0.556435	0.235469	2.36309	0.0181233	0.299559
PLAT	819.624	-0.544838	0.230658	2.3621	0.0181716	0.299827
SEMA6A-AS1	18.6981	-0.554851	0.234925	2.36183	0.0181852	0.299827
MYLIP	219.498	-0.533373	0.225985	2.36022	0.0182643	0.30074
PCSK5	485.268	0.549504	0.232864	-2.35977	0.0182864	0.30074
ST3GAL5	361.546	-0.447195	0.189577	2.35891	0.0183288	0.30106
B3GALNT1	358.188	-0.369536	0.156725	2.35786	0.0183805	0.30133
DUSP16	305.912	0.45816	0.194417	-2.35658	0.018444	0.30133
HOOK2	221.381	0.257534	0.109325	-2.35568	0.0184887	0.30133
PARD6G	108.282	-0.49574	0.210449	2.35563	0.0184916	0.30133
SAMD1	291.127	-0.282289	0.119797	2.35639	0.0184537	0.30133
SMPDL3A	133.968	0.493629	0.209446	-2.35683	0.0184314	0.30133
TPP2	604.903	-0.207149	0.0879489	2.35534	0.018506	0.30133
NLN	437.584	-0.286827	0.121868	2.3536	0.0185927	0.301993
PITPNM1	600.179	0.276781	0.117592	-2.35374	0.0185855	0.301993
LPAR1	2512.65	0.290622	0.123508	-2.35307	0.0186193	0.302052
QSOX2	291.823	0.300546	0.127892	-2.35001	0.0187731	0.303795
ST8SIA5	44.2184	-0.524243	0.223044	2.3504	0.0187532	0.303795
UBA5	420.725	-0.352161	0.150029	2.34729	0.0189107	0.305646
RASSF4	92.685	0.463953	0.197932	-2.344	0.0190783	0.307597
TPRG1L	625.184	-0.289166	0.123344	2.34439	0.0190585	0.307597
SPOCD1	654.45	-0.408296	0.174228	2.34346	0.0191058	0.307662
ADD1	2617.64	-0.212247	0.0906687	2.34091	0.0192369	0.309393
LRP6	744.918	-0.177964	0.0760728	2.33939	0.0193152	0.310273
ZNF766	119.635	-0.308631	0.131974	2.33858	0.0193571	0.310565
MBD2	575.314	0.208563	0.0892491	-2.33686	0.0194464	0.311056
PLCL2	52.5074	-0.457478	0.195786	2.33662	0.0194588	0.311056
UBXN6	1653.42	0.17974	0.0769199	-2.33671	0.019454	0.311056
B4GAT1	537.539	0.361679	0.155019	-2.33312	0.0196417	0.311363
NFKBIE	199.127	0.467672	0.200381	-2.33391	0.0196003	0.311363
PAICS	840.246	0.212085	0.0909037	-2.33308	0.0196441	0.311363
RAMP1	58.7135	-0.538723	0.230748	2.33469	0.0195599	0.311363
RASA1	1237.07	-0.198638	0.0851031	2.33409	0.0195909	0.311363
SLC22A4	46.7696	0.540981	0.231816	-2.33367	0.019613	0.311363
TAB2	1384.8	0.277273	0.118827	-2.33342	0.0196263	0.311363
UBIAD1	201.696	0.356911	0.153021	-2.33243	0.0196781	0.311527
ATP6V1C2	1760	0.367549	0.157644	-2.33151	0.0197265	0.311917
SH3TC1	40.9447	-0.442599	0.189877	2.33098	0.0197543	0.31198
CECR5	180.843	0.330353	0.141751	-2.33051	0.0197791	0.311997
SCYL1	1106.34	0.202983	0.0871578	-2.32891	0.0198639	0.312957
GYG2	69.3881	0.388697	0.167115	-2.32593	0.0200224	0.315077
EVA1A	302.402	0.459335	0.197692	-2.32348	0.0201531	0.31562
FBLN7	369.709	-0.5314	0.228625	2.32433	0.0201077	0.31562
MGEA5	1367.13	-0.21995	0.0946283	2.32436	0.0201062	0.31562
PIM2	145.838	0.538368	0.231686	-2.3237	0.0201417	0.31562
FAM178A	419.588	-0.295145	0.127092	2.3223	0.0202167	0.316238
TBC1D17	685.926	0.195133	0.0841242	-2.31958	0.0203633	0.318153
PHF6	300.91	-0.239909	0.103474	2.31855	0.0204196	0.318653
KCTD3	857.091	-0.243154	0.104954	2.31677	0.0205162	0.319401
PAG1	57.7945	0.507611	0.219064	-2.31718	0.0204939	0.319401
NUP107	244.675	-0.236502	0.102134	2.31562	0.0205792	0.320002
ALDH9A1	865.431	0.247114	0.106797	-2.31387	0.020675	0.320295
LOC100133286	310.069	-0.224583	0.0970754	2.31349	0.0206957	0.320295
PPAP2A	592.151	0.450505	0.194629	-2.31469	0.0206298	0.320295
RPS14P3	65.5331	0.40841	0.176506	-2.31385	0.0206757	0.320295
MAMDC4	134.439	0.393566	0.170181	-2.31263	0.0207429	0.320648
OSMR	5682.79	0.418105	0.180872	-2.31161	0.0207993	0.321141
MOB1B	532.238	-0.22153	0.0959145	2.30966	0.0209071	0.322426
HLX	127.94	0.443279	0.19214	-2.30705	0.0210518	0.324276
NMB	287.289	0.532297	0.230928	-2.30503	0.0211647	0.325341
STAT3	3598.08	0.239255	0.103801	-2.30493	0.0211704	0.325341
MPDZ	900.293	-0.200549	0.087174	2.30056	0.0214167	0.32874
FMOD	369.585	0.539792	0.234982	-2.29716	0.0216095	0.33054
NINJ2	34.0941	-0.48002	0.20893	2.29752	0.0215891	0.33054
PPRC1	576.532	0.282278	0.12285	-2.29774	0.0215765	0.33054
ALDH3B1	455.033	0.363145	0.158319	-2.29375	0.021805	0.332754
PKM	20571.2	0.337546	0.147149	-2.2939	0.0217963	0.332754
MTSS1	445.036	-0.523677	0.228513	2.29167	0.0219249	0.334195
FAM162A	323.888	0.381077	0.166531	-2.28832	0.0221186	0.336551
SDSL	48.1002	0.460592	0.201345	-2.28758	0.0221621	0.336551
TAF9B	205.903	-0.298239	0.130364	2.28774	0.0221525	0.336551
TMED1	467.497	0.333279	0.145713	-2.28724	0.022182	0.336551
ASPSCR1	207.389	0.273312	0.119563	-2.28592	0.0222591	0.337331
RAB40B	83.9629	-0.377504	0.165247	2.28448	0.0223431	0.338214
DIXDC1	555.438	-0.37452	0.164077	2.28259	0.0224545	0.338406
GJA1	16228.3	-0.272199	0.119233	2.28292	0.0224352	0.338406
IGFBP4	38599.4	0.536823	0.235067	-2.2837	0.0223892	0.338406
MBTPS1	2613.79	0.138478	0.0606809	-2.28208	0.0224848	0.338406
VAT1	3426.27	-0.38369	0.168102	2.28248	0.0224609	0.338406
AKTIP	202.83	-0.318907	0.139809	2.28102	0.0225472	0.338957
PLEKHA2	579.575	-0.275327	0.120753	2.28009	0.0226025	0.339399
PRPF38A	254.746	-0.253212	0.111154	2.27803	0.022725	0.340849
VPS35	1001.56	-0.166123	0.0730362	2.27453	0.0229342	0.343595
IFITM3	5363.56	0.374644	0.164865	-2.27243	0.0230608	0.344703
PDP1	432.995	-0.399184	0.175663	2.27244	0.0230599	0.344703
UBE2M	503.28	0.273212	0.120315	-2.27081	0.0231584	0.345769
PTPN11	1662.9	0.147614	0.0650216	-2.27023	0.0231938	0.345903
ST8SIA4	251.615	-0.504007	0.222064	2.26965	0.0232286	0.346029
SOD3	1006.96	0.513595	0.226348	-2.26905	0.0232654	0.346103
TIAM1	183.653	-0.515981	0.227434	2.26871	0.0232863	0.346103
SOX4	2102.8	-0.296325	0.130733	2.26665	0.0234117	0.34735
WWTR1	3802.5	-0.371122	0.163745	2.26646	0.0234231	0.34735
HECTD3	507.73	-0.19507	0.0861023	2.26556	0.0234786	0.34778
EIF3K	743.174	0.156309	0.0690305	-2.26434	0.0235532	0.348099
TPP1	1901.11	-0.242038	0.10688	2.26459	0.0235381	0.348099
VIMP	543.157	0.208477	0.0920962	-2.26369	0.0235934	0.348301
TMEM59	2190.67	0.279335	0.12345	-2.26274	0.0236516	0.348767
DARS	782.148	0.20343	0.0899285	-2.26213	0.0236893	0.348932
TLE3	681.872	0.249554	0.11034	-2.26169	0.0237164	0.348939
CCDC152	1430.71	-0.505309	0.223487	2.26102	0.023758	0.34916
ITGBL1	3211.89	-0.406729	0.180106	2.25828	0.023928	0.351266
AK5	264.226	-0.529651	0.234653	2.25717	0.0239977	0.351567
IFI35	180.79	0.289798	0.128394	-2.25709	0.0240021	0.351567
HIF1A-AS1	858.279	0.44531	0.197383	-2.25607	0.0240661	0.35211
TMEM117	116.218	-0.341398	0.151358	2.25556	0.0240981	0.352187
CHPF2	1916.61	0.246117	0.109173	-2.25437	0.0241728	0.352885
SUPT4H1	409.541	-0.23078	0.102405	2.25361	0.0242209	0.353195
VPS36	478.094	-0.311311	0.138245	2.25189	0.0243295	0.354384
ARHGAP5	1083.03	-0.267111	0.118711	2.25009	0.0244431	0.354823
GADD45A	1139.73	-0.407104	0.180935	2.25	0.0244491	0.354823
SLC2A1	719.098	0.372088	0.165334	-2.25052	0.0244156	0.354823
ST3GAL6	102.972	0.52374	0.232804	-2.2497	0.0244677	0.354823
RAB35	550.708	-0.169982	0.0756686	2.2464	0.0246783	0.357181
RCOR3	456.779	-0.234882	0.104564	2.2463	0.0246848	0.357181
CXCL12	12602.5	0.474929	0.211575	-2.24473	0.0247856	0.358244
NXPH3	62.8853	-0.51814	0.230896	2.24404	0.0248298	0.358489
HEXB	2857.1	0.441472	0.196781	-2.24347	0.0248665	0.358624
F2R	204.969	-0.528161	0.235501	2.24271	0.0249156	0.358938
ACSL4	5057.56	0.527287	0.235173	-2.24213	0.0249531	0.359057
ANK2	437.532	-0.39506	0.176363	2.24004	0.025088	0.359057
CSRP1	2005.99	-0.25988	0.115968	2.24095	0.025029	0.359057
RUFY3	467.027	-0.314213	0.140246	2.24044	0.0250626	0.359057
UNC93B1	249.816	0.228317	0.101921	-2.24013	0.0250824	0.359057
WLS	2715.77	0.200371	0.0894467	-2.24012	0.0250834	0.359057
OBFC1	252.579	-0.29063	0.12981	2.23889	0.0251633	0.359742
ANP32B	973.417	0.21581	0.0964706	-2.23705	0.0252829	0.361059
SLC25A22	231.692	0.300231	0.134277	-2.23591	0.0253575	0.36173
RRP9	148.479	0.314363	0.140645	-2.23516	0.0254072	0.362045
RAB3IL1	196.225	-0.495478	0.221736	2.23454	0.0254475	0.362226
CDK14	724.482	-0.306089	0.137032	2.23369	0.0255032	0.362626
AMT	134.828	-0.307733	0.137834	2.23265	0.0255723	0.363067
HAS2-AS1	101.162	0.487263	0.218334	-2.23173	0.0256326	0.363067
LRRC4	20.0794	-0.47719	0.213838	2.23155	0.0256449	0.363067
RASA3	1170.13	-0.165084	0.0739704	2.23175	0.0256312	0.363067
CCT7	1482.37	0.155958	0.0699093	-2.23086	0.0256905	0.363322
ATXN3	272.393	-0.235583	0.105776	2.22719	0.0259348	0.364421
CDK19	409.067	-0.249342	0.111912	2.22802	0.0258793	0.364421
ETV5	664.774	-0.290732	0.130536	2.22722	0.0259324	0.364421
FAM73B	261.025	0.249956	0.112166	-2.22846	0.02585	0.364421
KIAA0195	622.635	0.21384	0.0959382	-2.22893	0.0258183	0.364421
VCAM1	9285.77	0.475795	0.21361	-2.2274	0.0259205	0.364421
GAS6	16206.4	0.319878	0.143701	-2.226	0.0260141	0.365144
PAK3	30.9634	-0.478448	0.215059	2.22473	0.0260992	0.365555
TMEM217	37.5801	0.491702	0.220989	-2.22501	0.0260807	0.365555
IGF2R	4410.36	0.359485	0.161636	-2.22403	0.0261462	0.365823
NQO1	2126.66	-0.275706	0.124031	2.22288	0.0262241	0.366507
RAB22A	678.482	-0.26179	0.1178	2.22232	0.0262614	0.366507
SECISBP2	390.878	0.245078	0.110314	-2.22165	0.0263067	0.366507
STC2	2105.09	0.52164	0.234795	-2.22168	0.0263047	0.366507
PIAS1	195.995	-0.285015	0.12832	2.22113	0.0263424	0.366614
CYBRD1	7298.8	-0.271656	0.12252	2.21723	0.0266071	0.369906
PLAUR	1146.14	0.3118	0.140842	-2.21383	0.0268408	0.37276
MAML2	716.973	0.254004	0.114877	-2.21109	0.0270295	0.374984
SLC38A10	2360.71	0.303214	0.137214	-2.20979	0.0271199	0.375841
PKNOX2	50.1077	0.4917	0.222629	-2.20861	0.0272021	0.376583
GAL3ST4	98.7193	-0.406599	0.184336	2.20575	0.0274017	0.378577
RNASEH2B	303.397	-0.3393	0.153828	2.20572	0.0274039	0.378577
CPOX	279.223	0.232903	0.105622	-2.20507	0.0274495	0.378809
NRDE2	167.762	0.279605	0.126927	-2.20288	0.0276032	0.380529
ABLIM1	61.1304	-0.436106	0.198186	2.20049	0.0277721	0.38151
ANO10	518.315	0.222804	0.101328	-2.19885	0.0278889	0.38151
ENPEP	60.8708	0.493557	0.224254	-2.20088	0.0277443	0.38151
FN3KRP	236.411	-0.295269	0.134237	2.1996	0.0278351	0.38151
GPX1	1795.07	0.26224	0.119277	-2.19859	0.0279069	0.38151
HAS2	1021.66	0.466968	0.212221	-2.20039	0.0277795	0.38151
WBP1L	1239.53	0.17833	0.0810987	-2.19892	0.0278834	0.38151
YWHAH	658.271	-0.286318	0.130225	2.19863	0.027904	0.38151
ARNT	771.685	0.167285	0.0761647	-2.19636	0.0280665	0.381704
BDNF	219.377	0.504728	0.229781	-2.19656	0.0280515	0.381704
BTG2	1256.86	0.441523	0.200963	-2.19704	0.0280177	0.381704
MXD3	442.95	0.252743	0.115038	-2.19705	0.028017	0.381704
PDZRN3-AS1	14.2973	0.506645	0.230675	-2.19636	0.0280665	0.381704
MATN4	31.5124	-0.303952	0.138432	2.19567	0.0281154	0.381973
SCARB2	4173.24	0.163379	0.074448	-2.19454	0.0281963	0.382677
GLIS2	637.099	-0.32235	0.146964	2.1934	0.0282785	0.383396
B4GALT3	322.072	0.357833	0.163304	-2.1912	0.0284371	0.384069
DIP2B	516.692	-0.199566	0.0910937	2.19078	0.0284676	0.384069
IL18R1	87.5196	0.510681	0.233167	-2.1902	0.0285101	0.384069
SCAI	230.948	-0.252982	0.115405	2.19212	0.0283712	0.384069
SLC25A12	317.252	0.295325	0.134847	-2.19007	0.0285188	0.384069
TMEM119	3280.73	-0.431227	0.196779	2.19143	0.0284209	0.384069
ZYG11B	610.008	-0.179673	0.0820472	2.18988	0.028533	0.384069
IRS2	634.453	0.483591	0.220881	-2.18937	0.0285699	0.384171
SLC2A12	369.71	-0.404921	0.185021	2.18851	0.0286325	0.38462
C11orf96	1662.43	0.477702	0.218609	-2.18519	0.0288749	0.385117
ENPP1	2355.66	-0.51464	0.235502	2.18529	0.0288678	0.385117
FAM126A	1194.48	0.245968	0.112438	-2.18759	0.0286997	0.385117
LIMS2	49.5147	-0.514626	0.235504	2.18522	0.0288729	0.385117
SEPP1	1935.35	-0.485013	0.221935	2.18539	0.0288605	0.385117
SH3D21	54.1359	0.493381	0.225725	-2.18576	0.0288331	0.385117
TCTN1	545.435	0.283338	0.129546	-2.18716	0.0287307	0.385117
BACE2	988.435	0.433024	0.198249	-2.18424	0.0289444	0.38526
CHI3L1	214690	0.469978	0.215144	-2.18448	0.0289271	0.38526
TMEM19	289.113	-0.263862	0.120914	2.18224	0.0290918	0.38683
DMKN	65.189	0.477892	0.219084	-2.18132	0.0291601	0.386896
MIOS	235.459	0.266338	0.122121	-2.18092	0.029189	0.386896
TLDC1	193.687	-0.319738	0.146624	2.18066	0.0292085	0.386896
TRPC1	265.75	-0.233902	0.107266	2.18058	0.0292147	0.386896
EREG	204.315	0.496712	0.227918	-2.17934	0.0293062	0.387716
ZDHHC3	532.769	-0.173867	0.0797998	2.17879	0.0293473	0.38787
TFB2M	143.613	0.266385	0.12233	-2.17759	0.0294365	0.388656
A2M	1654.6	-0.463446	0.213097	2.17481	0.0296441	0.390552
CORO1C	1977.67	-0.246897	0.113543	2.17448	0.0296693	0.390552
NINJ1	534.444	0.348864	0.160433	-2.17451	0.0296666	0.390552
GABRE	270.466	0.506699	0.233194	-2.17287	0.0297903	0.39136
MYO6	637.588	-0.322901	0.14859	2.1731	0.0297725	0.39136
DDR2	2001.56	0.21022	0.0967693	-2.17239	0.0298265	0.391443
C11orf71	28.1389	0.49489	0.228171	-2.16894	0.030087	0.393695
SCARF1	45.2194	0.425919	0.196373	-2.16893	0.0300881	0.393695
SDF4	3916.76	0.344223	0.158664	-2.1695	0.0300444	0.393695
FAXDC2	376.996	-0.298283	0.137625	2.16735	0.0302079	0.393774
PRPS1	177.114	-0.304918	0.140639	2.16809	0.0301516	0.393774
RELL1	123.876	0.454078	0.209488	-2.16757	0.0301917	0.393774
ZFYVE21	389.208	-0.306942	0.141626	2.16727	0.0302141	0.393774
ZNF486	92.5783	-0.353972	0.163414	2.1661	0.0303035	0.394455
ZNF608	388.969	-0.497558	0.229734	2.1658	0.0303265	0.394455
GBGT1	21.9318	0.500507	0.23117	-2.1651	0.0303797	0.394756
FAM109A	222.804	-0.278232	0.128604	2.16348	0.0305043	0.395982
RRAGC	467.212	-0.316273	0.146407	2.16023	0.0307547	0.398838
ECE2	18.4978	0.488347	0.226109	-2.15979	0.0307889	0.398887
CLPTM1	1414.22	0.220236	0.101997	-2.15924	0.0308314	0.399045
LOC100507642	16.3356	0.503992	0.233583	-2.15765	0.0309547	0.400246
XPO1	1610.95	-0.216187	0.100285	2.15573	0.031105	0.401794
ELOVL3	51.1514	0.507102	0.235329	-2.15487	0.0311722	0.402265
RNF128	32.2069	-0.495151	0.229837	2.15436	0.0312121	0.402385
DLAT	353.236	0.317197	0.147374	-2.15232	0.0313721	0.404051
LPPR2	719.081	0.273091	0.126933	-2.15146	0.0314402	0.404531
ARRDC3	1580.84	-0.361375	0.16838	2.14619	0.0318577	0.406023
CNOT3	467.769	0.215007	0.10012	-2.1475	0.0317537	0.406023
CPT1A	944.56	-0.326137	0.151754	2.14912	0.0316251	0.406023
FGFR3	29.5226	-0.500108	0.232984	2.14653	0.0318308	0.406023
GALNT18	99.3002	0.501321	0.233449	-2.14746	0.0317568	0.406023
MAN2B1	2169.98	0.216091	0.100593	-2.14816	0.0317013	0.406023
MIR1260B	23.8767	0.461521	0.214815	-2.14845	0.0316777	0.406023
NDRG3	436.8	-0.211905	0.098711	2.14672	0.0318152	0.406023
PSMB4	1235.52	0.173551	0.0808247	-2.14726	0.0317729	0.406023
SLC20A1	3094.38	-0.429938	0.200335	2.14609	0.0318655	0.406023
EEF1D	3018.57	0.187523	0.0874093	-2.14535	0.0319249	0.406384
PLA2G5	25.1197	-0.490258	0.228628	2.14435	0.0320049	0.407008
SH3RF1	419.004	-0.333805	0.15583	2.14211	0.032185	0.408902
KIAA1644	1753.42	-0.411877	0.192318	2.14164	0.0322222	0.408979
EXOC1	433.176	-0.187257	0.0874769	2.14064	0.032303	0.409608
DYNC1I2	921.407	-0.223332	0.104375	2.13972	0.0323773	0.409759
PEX11B	151.397	-0.29544	0.138073	2.13974	0.0323756	0.409759
ACVR1C	33.5433	-0.501512	0.234695	2.13687	0.0326088	0.411498
KAZN	269.252	-0.393599	0.18413	2.13762	0.0325474	0.411498
RAB27B	1412.14	0.49199	0.230221	-2.13704	0.0325949	0.411498
CAB39	700.545	-0.220706	0.103435	2.13378	0.032861	0.414106
EPS15	648.87	-0.215599	0.101051	2.13356	0.0328786	0.414106
GGN	51.1768	-0.401111	0.188092	2.13252	0.0329639	0.414522
KPNA2	325.11	0.273609	0.128311	-2.13239	0.0329748	0.414522
ARHGAP19	106.638	-0.400072	0.187675	2.13173	0.0330293	0.41481
KIAA0319L	616.662	0.374153	0.175549	-2.13133	0.0330618	0.414821
KANK1	393.341	-0.383599	0.180024	2.13082	0.033104	0.414954
ANKRD13B	198.01	-0.274508	0.128973	2.12841	0.0333031	0.415913
PPP1R12A	1046.57	-0.218147	0.102495	2.12836	0.0333073	0.415913
SEC61G	373.255	0.228593	0.107379	-2.12886	0.0332662	0.415913
TALDO1	1460.67	0.179837	0.0844754	-2.12887	0.0332649	0.415913
TRAPPC2	85.8	-0.326144	0.153462	2.12524	0.0335665	0.418752
C21orf2	301.689	0.233427	0.10993	-2.12342	0.0337187	0.4192
LNX1	91.6728	0.469937	0.22129	-2.12362	0.0337015	0.4192
SORBS2	339.283	0.416599	0.196205	-2.12328	0.0337302	0.4192
ZEB1-AS1	40.1839	-0.401871	0.18918	2.12428	0.0336467	0.4192
EFNA5	338.108	-0.372357	0.175546	2.12114	0.03391	0.420637
P2RY1	17.7049	-0.495089	0.233378	2.12141	0.0338873	0.420637
PIEZO1	2769.97	0.315657	0.148922	-2.11961	0.034039	0.42161
PRELID1	634.33	0.224828	0.106078	-2.11945	0.0340526	0.42161
EVC	1130.88	-0.267155	0.126084	2.11886	0.034102	0.421752
LUM	20538.9	0.463007	0.218627	-2.11779	0.0341926	0.421752
TSLP	22.4404	0.495056	0.233712	-2.11823	0.0341553	0.421752
WBP2	973.972	0.27952	0.131964	-2.11816	0.0341616	0.421752
ABL1	3262.7	0.224321	0.105959	-2.11705	0.0342553	0.422128
DOCK11	284.386	-0.323804	0.153239	2.11307	0.0345952	0.425917
MORF4L1	1905.6	-0.173402	0.0820808	2.11258	0.0346367	0.426016
MRAP	36.9409	0.455639	0.215717	-2.11221	0.0346682	0.426016
FOXO1	164.387	-0.433913	0.20576	2.10883	0.0349594	0.429193
NREP	860.417	-0.400128	0.189774	2.10844	0.0349926	0.429199
AIFM2	247.328	0.371638	0.176323	-2.10771	0.0350561	0.429332
ALKBH7	328.427	0.197044	0.093523	-2.1069	0.035126	0.429332
C11orf95	770.591	-0.195089	0.0925773	2.10731	0.0350911	0.429332
DLX6	41.7511	-0.424877	0.201722	2.10625	0.0351829	0.429332
NTAN1	383.904	-0.295481	0.140326	2.10568	0.0352324	0.429332
SERPINF1	6221.11	-0.302932	0.143837	2.10608	0.0351975	0.429332
TNFRSF18	23.0375	0.491871	0.233568	-2.1059	0.0352126	0.429332
HLA-B	4922.11	0.464851	0.220836	-2.10496	0.0352951	0.429697
APOL3	82.599	0.445985	0.212009	-2.10361	0.0354123	0.430724
CBFB	624.11	-0.262367	0.124833	2.10174	0.0355761	0.431524
CUX1	1106.63	0.164495	0.0782557	-2.10202	0.0355511	0.431524
VAMP4	189.188	-0.335318	0.159544	2.10173	0.0355767	0.431524
REL	205.609	0.397067	0.189098	-2.0998	0.0357468	0.433187
DGAT2	76.3713	0.47182	0.224801	-2.09883	0.0358318	0.433817
NKX3-2	19.4937	-0.474229	0.226104	2.0974	0.0359583	0.434146
SHC3	60.0148	0.473828	0.225877	-2.09773	0.0359292	0.434146
SSH1	2073.96	-0.232074	0.110643	2.0975	0.0359495	0.434146
ATF7IP	752.416	-0.192684	0.0919602	2.0953	0.0361447	0.434227
CREG1	1282.11	0.462916	0.220885	-2.09573	0.0361059	0.434227
MEGF9	684.16	-0.175682	0.0838692	2.09471	0.0361966	0.434227
PSME2	347.485	0.255485	0.121882	-2.09617	0.0360672	0.434227
RNF125	18.0327	-0.493357	0.235426	2.0956	0.0361181	0.434227
SCYL2	519.988	-0.207711	0.0990815	2.09637	0.0360498	0.434227
UXT-AS1	128.905	0.301979	0.14416	-2.09475	0.0361933	0.434227
MEGF8	2223.67	0.213602	0.102014	-2.09385	0.0362735	0.434752
CALCRL	44.5175	-0.434534	0.207755	2.09157	0.0364771	0.436624
ZNF106	1383.4	-0.28879	0.138088	2.09136	0.0364962	0.436624
ITPRIP	1619.78	-0.292183	0.139752	2.09072	0.0365528	0.436902
BOC	1487.43	0.476881	0.22829	-2.08892	0.0367145	0.438436
SEC14L1	876.497	-0.203625	0.0975445	2.08751	0.0368418	0.439556
CAPRIN1	2866.11	-0.18849	0.0903774	2.08559	0.0370156	0.441228
ANKRD36	95.8964	-0.352476	0.16923	2.08283	0.0372671	0.44187
CFB	87.4863	0.340405	0.163315	-2.08434	0.0371292	0.44187
EDC3	303.767	-0.198846	0.0954786	2.08263	0.0372852	0.44187
RYBP	792.031	-0.198579	0.0952937	2.08387	0.0371723	0.44187
SLC18B1	119.458	0.432329	0.20761	-2.08241	0.0373051	0.44187
TNFRSF12A	1506.22	0.190049	0.0912534	-2.08265	0.0372828	0.44187
UNC5B	2113.16	-0.473655	0.227398	2.08293	0.0372573	0.44187
PSMD5	436.608	-0.221512	0.106443	2.08104	0.0374306	0.442957
C4orf27	165.044	-0.274626	0.132102	2.07889	0.0376277	0.444607
PTGR1	439.114	0.21487	0.103364	-2.07878	0.0376378	0.444607
FHDC1	17.8581	0.446019	0.214628	-2.07811	0.0376996	0.444937
CBR1	601.751	-0.180446	0.0868868	2.07679	0.0378206	0.445964
JUN	14899.4	0.427566	0.205961	-2.07596	0.0378978	0.446473
ZMYND15	28.6046	0.469078	0.22601	-2.07547	0.0379426	0.446599
AGFG1	730.141	0.179881	0.0867566	-2.0734	0.0381354	0.448466
SIRT3	205.876	-0.2204	0.106334	2.0727	0.0381998	0.448822
PRKAR2B	96.8823	0.479837	0.231577	-2.07205	0.0382612	0.449142
CXXC5	991.301	-0.207182	0.100022	2.07136	0.038325	0.44921
MEPCE	807.334	0.273603	0.132096	-2.07125	0.0383355	0.44921
AQP3	19.4513	-0.487496	0.235426	2.07069	0.0383874	0.449417
LARP6	575.497	-0.277758	0.134283	2.06846	0.0385973	0.451471
RPS16	4473.77	0.14779	0.0714731	-2.06777	0.0386618	0.451823
METTL10	135.477	-0.272641	0.131926	2.06663	0.0387695	0.452678
SMC5	563.052	-0.203218	0.0984371	2.06444	0.0389759	0.454685
CEP350	981.344	0.320947	0.155688	-2.06148	0.0392572	0.456668
FAM65B	42.7835	0.45773	0.222046	-2.06142	0.0392632	0.456668
TBC1D9	385.164	0.324862	0.157609	-2.06119	0.0392851	0.456668
WDR1	4089.56	-0.130673	0.0633857	2.06156	0.03925	0.456668
MYCBP2-AS1	91.083	-0.347357	0.168653	2.05959	0.0394377	0.458036
LBH	657.185	-0.468241	0.227519	2.05803	0.0395876	0.45883
LRPAP1	1563.7	0.349959	0.170046	-2.05803	0.0395871	0.45883
NAB2	743.595	-0.326442	0.158638	2.05778	0.039611	0.45883
APPL1	595.796	-0.274915	0.133694	2.05631	0.0397528	0.459879
C1orf53	30.2897	0.471749	0.229519	-2.05539	0.0398417	0.459879
QPCT	145.509	0.476017	0.231588	-2.05545	0.0398359	0.459879
TGOLN2	3317.35	0.133913	0.0651495	-2.05547	0.0398337	0.459879
FICD	92.5909	0.379772	0.185002	-2.0528	0.040092	0.461145
MAN2B2	1988.91	0.225324	0.109716	-2.05369	0.0400053	0.461145
PSMD3	1016.33	0.186226	0.0907091	-2.053	0.0400722	0.461145
RPL23AP82	181.872	-0.339454	0.165322	2.0533	0.0400439	0.461145
ESRRA	312.423	0.355999	0.173467	-2.05226	0.0401444	0.461344
COL8A1	5460.32	0.387878	0.189102	-2.05115	0.0402522	0.462178
ATF3	2431.34	0.40252	0.196336	-2.05016	0.0403489	0.462374
EIF4A2	2856.13	-0.195128	0.0952047	2.04956	0.0404072	0.462374
NUP62	548.317	0.24766	0.120838	-2.04953	0.0404101	0.462374
ZNF622	285.328	0.215333	0.105037	-2.05007	0.0403578	0.462374
BBS2	412.265	-0.282695	0.138031	2.04805	0.0405554	0.462968
MAP1B	2684.54	-0.390619	0.190739	2.04792	0.0405679	0.462968
SLC5A6	303.487	0.345327	0.168583	-2.04841	0.0405195	0.462968
ANXA4	777.321	-0.345534	0.168855	2.04633	0.0407236	0.463938
BTBD10	257.885	-0.227686	0.111254	2.04654	0.0407036	0.463938
CSTA	31.2708	0.462106	0.225891	-2.0457	0.040786	0.464246
CAP1	2925.54	-0.185641	0.0907748	2.04507	0.0408476	0.464544
AKT3	899.056	-0.199164	0.0974185	2.04441	0.0409129	0.464884
TMED5	974.096	0.366744	0.179443	-2.04379	0.0409742	0.465178
LIMA1	3397.61	-0.124464	0.0609289	2.04277	0.0410754	0.465924
LOC100652999	364.744	-0.201939	0.0988974	2.0419	0.0411613	0.466006
ROCK1	1242.05	-0.207542	0.101628	2.04218	0.0411338	0.466006
SLC25A26	163.284	-0.263771	0.129197	2.04162	0.0411892	0.466006
APIP	156.757	0.307435	0.150792	-2.0388	0.0414699	0.46629
BRSK1	204	0.282902	0.138861	-2.03731	0.0416193	0.46629
CLEC2B	55.7128	-0.416129	0.204276	2.03709	0.0416406	0.46629
CRYAB	300.69	-0.320682	0.157404	2.03732	0.0416182	0.46629
DBR1	115.211	-0.271735	0.133351	2.03774	0.041576	0.46629
GPX4	1939.15	0.176457	0.0864826	-2.04037	0.0413133	0.46629
GRIA1	15.6239	0.431984	0.211758	-2.03998	0.0413519	0.46629
KIAA1683	138.629	0.466364	0.228661	-2.03955	0.0413955	0.46629
LHFP	1504.69	0.300747	0.147537	-2.03845	0.0415053	0.46629
RABL3	219.478	-0.239839	0.117633	2.03888	0.0414623	0.46629
RBFOX2	2918.66	-0.280678	0.137546	2.04062	0.0412889	0.46629
ZMAT2	518.061	-0.186942	0.0916504	2.03973	0.0413772	0.46629
CRISPLD2	561.566	0.408842	0.200853	-2.03552	0.0417983	0.466928
FBXO32	1261.84	-0.339056	0.166683	2.03414	0.0419376	0.466928
FCGRT	1864.81	0.209908	0.103176	-2.03446	0.0419055	0.466928
HOXA10	601.279	-0.353368	0.173727	2.03405	0.0419467	0.466928
HSPB7	259.589	-0.478375	0.23506	2.03512	0.0418386	0.466928
INO80C	133.14	0.320411	0.157498	-2.03438	0.0419132	0.466928
KCNS1	20.4884	-0.468287	0.230108	2.03508	0.0418433	0.466928
NDUFB9	449.077	0.221112	0.108727	-2.03364	0.0419876	0.466987
CSNK1G2	918.728	0.128371	0.0631546	-2.03265	0.0420876	0.467578
RAC1	1802.64	-0.226157	0.111275	2.03241	0.042112	0.467578
TMEM33	437.347	-0.192496	0.0947365	2.0319	0.0421633	0.467606
ZNF738	68.6521	-0.366598	0.18044	2.03168	0.0421858	0.467606
CIR1	313.435	-0.202292	0.0996249	2.03054	0.0423018	0.468102
HSD17B11	301.11	-0.333146	0.164051	2.03074	0.042281	0.468102
FARSA	453.076	0.23808	0.117347	-2.02886	0.0424726	0.4692
GGCX	1125.2	0.143999	0.0709656	-2.02914	0.0424442	0.4692
ABCB6	420.219	0.249307	0.123015	-2.02664	0.0426996	0.469667
C3orf14	60.5763	-0.394305	0.194601	2.02622	0.0427419	0.469667
ITGA9	15.4753	-0.461405	0.227557	2.02765	0.0425963	0.469667
MPDU1	331.206	0.193708	0.0955767	-2.02673	0.0426905	0.469667
NUAK1	265.482	-0.357788	0.176599	2.02599	0.0427653	0.469667
PAQR7	260.432	0.267075	0.131751	-2.02711	0.0426507	0.469667
S100A13	743.623	-0.378109	0.18661	2.0262	0.0427443	0.469667
NUAK2	48.3231	0.475737	0.234894	-2.02533	0.0428334	0.470021
ANKRD34A	33.2177	-0.420352	0.207804	2.02283	0.0430903	0.470596
COMMD8	123.453	-0.302969	0.149739	2.02331	0.0430411	0.470596
PEX11A	78.7941	0.340088	0.168139	-2.02266	0.0431087	0.470596
SLC25A42	133.755	0.264789	0.130929	-2.02238	0.0431368	0.470596
SURF4	4753.02	0.220432	0.10897	-2.02287	0.0430871	0.470596
ZFP36L2	1561.82	-0.354795	0.17541	2.02266	0.0431081	0.470596
ZNF599	38.2698	-0.386549	0.191125	2.02249	0.0431261	0.470596
HAUS2	208.632	-0.262546	0.129853	2.02187	0.0431901	0.470786
C16orf58	870.357	0.200456	0.099215	-2.02042	0.0433397	0.471243
CPNE3	1159.41	-0.147088	0.0727989	2.02047	0.0433344	0.471243
KREMEN1	393.462	0.420514	0.208122	-2.02051	0.0433301	0.471243
IL11RA	447.204	-0.354473	0.175642	2.01816	0.0435749	0.473408
NRD1	1344.4	0.157624	0.0781259	-2.01757	0.0436364	0.473684
BTBD3	294.079	-0.320146	0.15892	2.01451	0.0439562	0.474409
C1GALT1C1	267.086	0.346395	0.171788	-2.01641	0.0437573	0.474409
FAM214A	292.537	-0.253667	0.125908	2.0147	0.0439361	0.474409
KIAA1586	104.149	-0.334252	0.165839	2.01552	0.0438499	0.474409
LINC01481	18.1007	0.46241	0.22938	-2.01592	0.0438088	0.474409
SLC6A9	352.16	0.47226	0.23442	-2.01459	0.043948	0.474409
TRIB2	1423.46	-0.370894	0.183994	2.01579	0.0438218	0.474409
CBX5	1155.65	-0.161883	0.0804652	2.01183	0.0442375	0.475377
CYSTM1	255.774	-0.334468	0.166251	2.01183	0.0442379	0.475377
GPNMB	4603.37	-0.368832	0.183352	2.01161	0.0442611	0.475377
SLC4A7	1243.05	-0.266982	0.132649	2.01269	0.0441471	0.475377
ZBTB14	127.562	-0.316711	0.157443	2.01159	0.0442632	0.475377
ZNF280D	416.066	-0.172682	0.0858184	2.01218	0.0442006	0.475377
HSD11B1	313.409	0.352948	0.175668	-2.00918	0.0445181	0.476484
KRAS	402.756	-0.212033	0.105539	2.00904	0.0445327	0.476484
MAPK1	1312.3	-0.184043	0.0915721	2.00982	0.0444502	0.476484
NAV3	423.806	0.410293	0.204291	-2.00837	0.0446038	0.476484
PLEKHH2	192.473	-0.384897	0.191672	2.00811	0.0446317	0.476484
POLE	227.482	-0.264991	0.131864	2.00958	0.0444753	0.476484
TBX2	455.699	-0.322858	0.160776	2.00812	0.0446304	0.476484
UQCRC1	916.367	0.260578	0.129778	-2.00787	0.0446568	0.476484
ACADS	174.799	0.282532	0.140953	-2.00444	0.0450228	0.478181
BACH2	150.236	-0.351009	0.175114	2.00447	0.0450201	0.478181
CYB5D1	263.566	0.361328	0.180241	-2.00469	0.0449959	0.478181
LIMD1-AS1	178.287	-0.285495	0.142387	2.00507	0.044956	0.478181
TENM4	1933.97	-0.410316	0.204714	2.00433	0.0450344	0.478181
ZNF483	16.7111	-0.457283	0.227985	2.00576	0.0448821	0.478181
BCKDHA	343.737	0.307879	0.153657	-2.00367	0.0451051	0.478358
HS6ST1	286.028	0.445898	0.22256	-2.0035	0.0451239	0.478358
ALDH3A2	1232.67	-0.360069	0.179801	2.0026	0.0452199	0.478413
C14orf28	78.2156	-0.3053	0.152465	2.00243	0.0452386	0.478413
MBLAC1	15.6295	0.456166	0.227746	-2.00296	0.045182	0.478413
KLHL21	1103.68	-0.299224	0.149578	2.00045	0.0454517	0.479304
MAP2	218.516	-0.4037	0.201824	2.00026	0.0454722	0.479304
MEX3B	195.643	-0.348475	0.174242	1.99995	0.0455054	0.479304
SUV39H1	34.2059	-0.396963	0.19836	2.00122	0.0453686	0.479304
VPS18	339.937	-0.275361	0.137661	2.00027	0.0454706	0.479304
RASIP1	30.5069	0.451452	0.225818	-1.99918	0.0455884	0.479793
H6PD	2718.33	0.176042	0.0881212	-1.99773	0.0457459	0.481065
EEF2K	421.57	-0.309823	0.155226	1.99594	0.0459405	0.481953
ERN1	143.95	0.431148	0.215968	-1.99635	0.0458955	0.481953
MORN4	119.824	-0.267319	0.133913	1.99621	0.0459107	0.481953
MCM6	332.037	-0.333256	0.16702	1.9953	0.0460099	0.482295
CHIC2	246.67	0.193807	0.0971848	-1.99421	0.0461289	0.483157
ATF7	998.143	-0.197164	0.0988974	1.99363	0.0461928	0.483441
SFXN4	112.953	0.351059	0.176133	-1.99315	0.0462445	0.483596
LRRC8A	917.06	-0.206558	0.103726	1.99139	0.0464377	0.485221
PCYT1A	303.26	-0.197929	0.0994087	1.99106	0.0464738	0.485221
NEK9	1239.57	-0.166039	0.0834267	1.99024	0.0465647	0.485783
DMD	34.6595	-0.467869	0.235156	1.98961	0.0466342	0.486122
DENND6B	125.26	-0.282906	0.14222	1.98921	0.0466781	0.486193
CLPP	356.232	0.205428	0.103369	-1.98733	0.0468857	0.486767
PAK4	370.791	0.209078	0.105239	-1.9867	0.0469557	0.486767
PHAX	559.427	-0.194629	0.0979408	1.98721	0.0468992	0.486767
PRDX6	1352.63	0.167712	0.0843965	-1.98719	0.0469017	0.486767
PTGER4	300.714	0.411651	0.207187	-1.98686	0.0469377	0.486767
SERBP1	2344.89	-0.118799	0.0597693	1.98762	0.0468535	0.486767
CTSH	26.8987	-0.466534	0.234893	1.98616	0.0470154	0.487001
NOMO2	563.45	0.343739	0.173248	-1.98409	0.0472463	0.489006
GRPEL1	210.623	0.301335	0.15195	-1.98312	0.0473543	0.489738
NAP1L4	932.897	-0.147336	0.0743639	1.98128	0.0475597	0.491475
SACM1L	455.035	-0.237883	0.120099	1.98073	0.0476215	0.491727
CBWD1	119.122	0.258939	0.130764	-1.98019	0.0476817	0.491858
LINC01089	55.8449	-0.414279	0.209239	1.97993	0.0477108	0.491858
MFHAS1	200.731	-0.299433	0.151258	1.97962	0.0477466	0.491858
ERBB2IP	1054.4	-0.229528	0.116038	1.97804	0.0479237	0.492709
HTRA1	11701.6	-0.286971	0.145064	1.97823	0.0479022	0.492709
PLEKHM2	1460.11	-0.16209	0.0819512	1.97788	0.0479419	0.492709
DNPEP	487.457	0.192535	0.0973631	-1.97749	0.0479858	0.492775
ZNF93	89.2573	-0.395037	0.199966	1.97552	0.0482089	0.494679
ETV6	393.906	0.218021	0.11044	-1.97411	0.0483695	0.495019
FAM98C	119.007	-0.270666	0.137113	1.97403	0.0483782	0.495019
MRPS7	204.799	0.214567	0.10868	-1.9743	0.0483474	0.495019
RALB	565.514	-0.196401	0.0994989	1.9739	0.0483929	0.495019
EDNRB	28.9957	0.3424	0.173579	-1.97258	0.048543	0.496167
PSME1	757.509	0.209728	0.106346	-1.97213	0.0485944	0.496306
ADCY4	102.077	0.438479	0.222459	-1.97106	0.0487176	0.496405
FAM91A1	713.197	-0.193502	0.0981393	1.97171	0.0486428	0.496405
FEZ2	487.23	-0.186491	0.0946001	1.97136	0.0486828	0.496405
MGC32805	16.6173	0.377976	0.191831	-1.97036	0.0487968	0.496827
TNS3	1541.5	0.299271	0.152024	-1.96857	0.049002	0.498529
CAMK2D	1744.86	-0.309562	0.157348	1.96738	0.0491394	0.499153
CCT3	1507.32	0.159338	0.0809867	-1.96746	0.0491297	0.499153
PON2	592.09	0.34323	0.174499	-1.96694	0.0491903	0.499283
BEND5	25.9151	-0.41436	0.210786	1.96578	0.0493236	0.499921
ELN	243.394	-0.452842	0.230439	1.96513	0.0493995	0.499921
NXPE3	513.548	-0.192456	0.0979617	1.96461	0.0494598	0.499921
SEC11C	131.285	0.291651	0.148419	-1.96505	0.0494088	0.499921
STIM2	265.135	-0.2609	0.132813	1.96442	0.0494816	0.499921
VWA8	306.607	0.186608	0.0949581	-1.96517	0.0493951	0.499921
ADCK4	284.777	0.288813	0.147138	-1.96287	0.0496617	0.50062
LINC00342	113.532	-0.286518	0.145971	1.96284	0.0496653	0.50062
LSP1	1202.74	-0.462095	0.235389	1.96311	0.0496333	0.50062
HAS1	306.826	0.396637	0.202141	-1.96218	0.0497414	0.500806
KLF5	355.199	0.381158	0.194268	-1.96202	0.04976	0.500806
FUS	2305.42	0.178865	0.0912124	-1.96097	0.0498828	0.500889
NCBP2	713.199	-0.159097	0.0811305	1.96101	0.0498782	0.500889
TMEM51-AS1	25.6056	-0.46084	0.234929	1.96161	0.0498075	0.500889
FBXO36	75.1959	-0.342329	0.174626	1.96036	0.0499542	0.501129
PALM	89.0214	-0.446736	0.227914	1.96011	0.049983	0.501129
TP53BP2	456.494	0.175382	0.0895227	-1.95908	0.0501031	0.501948
TMED9	1753.8	0.163522	0.0835039	-1.95826	0.0501995	0.502531
RRAGB	211.391	-0.219584	0.112167	1.95766	0.0502702	0.502855
TOMM40	290.043	0.27264	0.139292	-1.95732	0.0503094	0.502864
LRRC58	822.784	-0.179909	0.0919482	1.95664	0.0503899	0.503286
GAS1	2876	0.455185	0.232869	-1.95468	0.0506209	0.504587
NDE1	179.188	-0.285281	0.145946	1.9547	0.0506185	0.504587
SLC30A4	129.581	-0.250871	0.128352	1.95456	0.0506356	0.504587
CREBRF	480.414	-0.242885	0.124304	1.95397	0.0507053	0.504899
AFG3L1P	107.586	0.290265	0.148807	-1.95061	0.0511036	0.505032
C5orf51	523.746	-0.26893	0.137831	1.95116	0.0510383	0.505032
CEP89	180.239	-0.292056	0.149676	1.95125	0.0510271	0.505032
HERC3	181.124	-0.269667	0.138066	1.95317	0.050799	0.505032
IKZF2	158.804	-0.327922	0.168088	1.9509	0.0510693	0.505032
KIRREL	4128.99	0.245811	0.125976	-1.95125	0.0510275	0.505032
LPP	2256.27	-0.133431	0.068347	1.95226	0.0509078	0.505032
REXO2	857.611	-0.256939	0.131528	1.9535	0.0507608	0.505032
STARD9	204.48	-0.356816	0.182812	1.95183	0.0509588	0.505032
TBCCD1	156.18	-0.279719	0.143321	1.95169	0.0509744	0.505032
ACOT2	303.647	0.264446	0.135904	-1.94583	0.0516752	0.506426
AGAP1	612.935	0.362279	0.186026	-1.94746	0.0514791	0.506426
COQ2	118.472	0.377918	0.19409	-1.94713	0.0515196	0.506426
FAM20C	5515.49	0.168766	0.0866588	-1.94748	0.0514772	0.506426
FAM66C	31.629	-0.419947	0.215512	1.9486	0.051343	0.506426
GPM6B	51.1534	0.455991	0.233985	-1.94881	0.0513181	0.506426
IGSF1	20.7682	-0.411979	0.211555	1.94738	0.0514889	0.506426
INSC	36.7173	-0.34843	0.178885	1.94779	0.0514399	0.506426
PGF	458.112	0.458199	0.235507	-1.94559	0.0517043	0.506426
RMDN1	422.291	-0.177438	0.0911816	1.94599	0.0516563	0.506426
TACC1	1657.55	-0.219864	0.112968	1.94624	0.0516259	0.506426
TM9SF1	1023.14	0.15645	0.0804137	-1.94556	0.0517077	0.506426
MIB1	912.46	-0.122154	0.0628086	1.94486	0.0517915	0.506869
PTPRA	987.299	-0.16105	0.0828229	1.94451	0.0518342	0.506909
PDZD11	237.592	-0.231788	0.119261	1.94352	0.0519528	0.50769
BLOC1S2	421.827	-0.21312	0.109736	1.94211	0.0521237	0.508818
CD276	3017.49	-0.249609	0.128627	1.94056	0.0523116	0.508818
EXTL2	732.578	-0.190019	0.0979255	1.94044	0.0523259	0.508818
FKBP2	521.366	0.293602	0.151286	-1.94071	0.052294	0.508818
MOV10	542.789	0.247347	0.127419	-1.94121	0.0522331	0.508818
NIPSNAP3A	184.647	-0.29389	0.151464	1.94033	0.0523395	0.508818
PYCARD	138.472	-0.282611	0.145633	1.94057	0.0523108	0.508818
FAM225A	119.747	-0.329959	0.170153	1.93919	0.0524782	0.509411
NFATC2	87.6379	-0.449347	0.231684	1.93949	0.0524423	0.509411
C1orf43	1348.09	0.125691	0.0648361	-1.93859	0.052551	0.509522
FAM13B	542.895	-0.221892	0.114486	1.93817	0.0526027	0.509522
NEK10	39.233	-0.435565	0.224734	1.93814	0.0526061	0.509522
SH3D19	1226.63	-0.249731	0.128949	1.93666	0.0527872	0.510862
STX6	479.977	-0.179707	0.0928063	1.93637	0.0528223	0.510862
ACTR1A	1137.33	-0.194714	0.100655	1.93448	0.0530544	0.511256
ARL6IP5	2168.96	-0.308609	0.159725	1.93212	0.0533442	0.511256
ARRDC2	206.271	0.418158	0.216074	-1.93526	0.0529587	0.511256
FURIN	1448.53	0.157828	0.0816147	-1.93382	0.0531354	0.511256
PDDC1	651.184	-0.212304	0.109893	1.93192	0.0533694	0.511256
PYCR2	384.521	0.183822	0.0950955	-1.93302	0.0532332	0.511256
RAB27A	318.372	0.316562	0.163704	-1.93374	0.0531449	0.511256
RECQL4	70.5038	-0.355289	0.183753	1.93352	0.0531726	0.511256
SEMA6C	120.522	-0.312598	0.16176	1.93249	0.0532997	0.511256
SRI	687.086	-0.222701	0.115191	1.93331	0.0531982	0.511256
TIPARP	1163.11	-0.334188	0.172742	1.9346	0.0530391	0.511256
TNFSF11	385.315	0.450152	0.232935	-1.93253	0.0532947	0.511256
TRMT1L	139.88	-0.353063	0.182631	1.9332	0.0532115	0.511256
EDEM1	846.258	0.150933	0.078165	-1.93095	0.053489	0.512027
TNFRSF19	2564.49	-0.416882	0.215952	1.93044	0.0535527	0.512263
FOXF2	50.0704	-0.3669	0.190272	1.92829	0.0538186	0.513161
MEF2A	1027.08	-0.228564	0.118543	1.92811	0.0538421	0.513161
PDE4DIP	1967.41	0.296516	0.153757	-1.92848	0.053796	0.513161
SERTAD4	210.275	-0.442965	0.229701	1.92844	0.0538002	0.513161
TXNDC12	563.173	0.247968	0.128557	-1.92885	0.0537491	0.513161
FBXO46	128.019	0.277955	0.144232	-1.92715	0.0539615	0.513554
HNRNPUL2	316.582	-0.213035	0.110544	1.92715	0.0539606	0.513554
TRIM35	209.195	-0.267127	0.138687	1.92612	0.0540896	0.5144
CYBA	869.149	0.278153	0.14453	-1.92454	0.0542875	0.515908
IGSF10	102.883	-0.383182	0.199356	1.9221	0.0545936	0.518441
OLFML2B	3913.87	-0.34574	0.179922	1.92161	0.0546547	0.518646
IMPAD1	1729.73	0.175824	0.0915397	-1.92074	0.0547641	0.519309
ABHD2	2848.42	-0.341503	0.177903	1.91961	0.0549076	0.519593
COTL1	1641.62	0.267851	0.139532	-1.91964	0.0549035	0.519593
MAP3K8	119.373	0.450065	0.234462	-1.91957	0.0549128	0.519593
CEMP1	105.806	-0.393832	0.205228	1.919	0.0549846	0.519897
JAK1	1863.04	0.110569	0.0576743	-1.91713	0.0552216	0.521387
RARS2	378.418	-0.223602	0.116617	1.9174	0.0551875	0.521387
EGFL7	55.3893	0.412906	0.215538	-1.9157	0.0554031	0.522439
TAB3	312.267	0.202233	0.10557	-1.91563	0.0554126	0.522439
GALNS	721.034	0.263953	0.137834	-1.915	0.0554923	0.522815
FAM117A	152.813	-0.401945	0.209957	1.91441	0.0555675	0.523057
MICALL1	556.179	0.241046	0.125927	-1.91418	0.0555978	0.523057
CAB39L	129.932	-0.284202	0.148564	1.91299	0.0557494	0.523516
SMG5	825.455	0.171233	0.0895077	-1.91306	0.0557407	0.523516
VPS9D1-AS1	137.538	0.249043	0.130194	-1.91286	0.0557662	0.523516
RTN2	119.169	-0.319614	0.167173	1.91188	0.0558917	0.523945
TIMP1	21837.9	0.340665	0.178163	-1.9121	0.0558639	0.523945
LINC01423	85.7229	-0.407569	0.213221	1.91149	0.055942	0.524042
ASPHD1	95.9729	0.36165	0.189238	-1.91108	0.0559941	0.524156
GTF2IRD1P1	157.222	-0.246198	0.128919	1.90971	0.0561711	0.524562
MFAP3	402.954	-0.233291	0.122168	1.90959	0.0561856	0.524562
NFU1	202.771	0.200273	0.104854	-1.91001	0.0561314	0.524562
TNKS1BP1	2198.35	0.216618	0.113442	-1.9095	0.0561974	0.524562
C2orf68	268.433	-0.199034	0.104439	1.90573	0.0566848	0.528736
THAP10	16.0462	-0.440072	0.231049	1.90467	0.0568226	0.529644
C17orf96	35.1085	0.432088	0.227008	-1.9034	0.056988	0.53081
LRP1B	89.7415	0.289707	0.152238	-1.90299	0.0570422	0.53083
PHYHD1	84.046	-0.349016	0.183426	1.90277	0.0570711	0.53083
DNAJC8	793.693	-0.159823	0.0840165	1.90229	0.0571338	0.531037
HEG1	3044.16	0.434691	0.228673	-1.90093	0.0573114	0.532148
LRRC16A	119.917	-0.343275	0.180629	1.90044	0.057375	0.532148
MRPL23	229.38	0.201594	0.106077	-1.90045	0.0573742	0.532148
G3BP1	961.646	0.139034	0.0731901	-1.89962	0.0574824	0.532768
ESYT1	1297.78	-0.249308	0.131289	1.89892	0.0575746	0.53287
FLVCR2	18.5019	0.435576	0.229365	-1.89905	0.0575583	0.53287
TARS2	172.413	-0.274201	0.144445	1.89831	0.0576556	0.533243
C12orf49	310.712	-0.196027	0.103331	1.89707	0.0578183	0.534226
CCDC74A	128.745	-0.350855	0.185037	1.89614	0.0579417	0.534226
HES1	419.554	-0.406645	0.214434	1.89637	0.0579113	0.534226
KLHL28	254.256	-0.290253	0.15309	1.89596	0.0579654	0.534226
LMO4	751.247	0.247261	0.130412	-1.89601	0.0579593	0.534226
POLH	622.688	-0.222706	0.117529	1.89491	0.0581046	0.535133
ATP5G1	273.293	0.21938	0.115943	-1.89213	0.058473	0.535865
GNB5	306.715	-0.248179	0.131135	1.89254	0.0584193	0.535865
LMNA	15987.1	-0.230279	0.121693	1.8923	0.0584514	0.535865
MXRA7	1939.37	0.166719	0.0880875	-1.89265	0.0584039	0.535865
NUP88	226.132	0.228379	0.120665	-1.89266	0.0584032	0.535865
NUS1	570.382	0.20793	0.109798	-1.89376	0.0582569	0.535865
SLC25A1	676.608	0.163575	0.086462	-1.89187	0.0585081	0.535865
ZNF414	121.288	0.253663	0.134082	-1.89185	0.0585107	0.535865
MAFK	315.728	0.254281	0.134573	-1.88953	0.0588206	0.538327
KCNJ2-AS1	18.025	0.444602	0.235432	-1.88845	0.0589653	0.539017
SNAP23	561.385	-0.211357	0.111926	1.88836	0.0589781	0.539017
ATP5J2	157.893	0.300564	0.159251	-1.88737	0.0591112	0.539483
CEP170	1122.01	-0.263425	0.139569	1.88742	0.0591042	0.539483
PPP1CB	1955.19	-0.212202	0.112487	1.88646	0.0592328	0.540216
ARID5B	1813.1	0.309336	0.164028	-1.88588	0.0593113	0.540557
JUNB	10364.1	0.26125	0.138575	-1.88526	0.0593949	0.540577
NTRK2	67.3543	-0.408151	0.216527	1.88499	0.0594307	0.540577
SNN	223.184	-0.288147	0.152867	1.88495	0.0594371	0.540577
GPC2	31.4199	-0.389764	0.206904	1.88379	0.0595933	0.541622
DHRS13	74.992	0.399933	0.212452	-1.88247	0.0597728	0.542762
ZNF512	336.21	-0.247165	0.131313	1.88225	0.0598015	0.542762
PPP2R5B	278.747	0.199173	0.105862	-1.88144	0.0599119	0.543389
COX7B	352.613	0.295261	0.15698	-1.88089	0.0599872	0.543531
SZT2	973.286	0.17318	0.0920818	-1.88072	0.0600104	0.543531
OS9	4613.46	0.207882	0.110565	-1.88017	0.0600844	0.543826
LMAN1	3044.72	0.221611	0.117914	-1.87943	0.0601863	0.543998
MYL6B	519.015	0.234104	0.124552	-1.87956	0.0601675	0.543998
MRPS15	270.872	0.208693	0.111068	-1.87896	0.06025	0.544199
ABCC1	1487.96	0.173139	0.0922174	-1.8775	0.060449	0.544272
LINC00341	120.148	-0.441979	0.235457	1.87711	0.0605025	0.544272
PGAM4	64.2611	0.308687	0.164413	-1.8775	0.060449	0.544272
STOM	1250.41	0.34211	0.182159	-1.87808	0.0603703	0.544272
STYX	290.995	-0.215394	0.114749	1.87708	0.0605069	0.544272
TMEM198B	258.494	-0.245995	0.131031	1.87738	0.0604658	0.544272
ANAPC7	337.203	-0.208882	0.111388	1.87526	0.0607566	0.54428
CCDC110	18.8054	-0.441631	0.235465	1.87557	0.0607143	0.54428
MYCBP2	1342.66	-0.170705	0.0910069	1.87573	0.0606919	0.54428
ZNF441	75.7421	-0.323237	0.17227	1.87634	0.0606084	0.54428
ZNF470	116.452	-0.281282	0.149995	1.87528	0.0607544	0.54428
ZSWIM4	298.733	0.313431	0.167105	-1.87565	0.0607032	0.54428
C2orf42	105.6	-0.280899	0.14985	1.87454	0.0608567	0.544708
SLC7A8	1331.82	-0.238204	0.127089	1.87431	0.0608875	0.544708
PSMD2	1823.35	0.120134	0.0641099	-1.87387	0.0609477	0.544876
HIF1A-AS2	2167.47	0.355086	0.189527	-1.87354	0.0609938	0.544917
STRN4	943.285	0.141028	0.0752868	-1.87321	0.0610397	0.544956
MYDGF	1457.9	0.318898	0.170343	-1.8721	0.0611932	0.545584
TRIM56	563.795	0.157303	0.0840198	-1.87221	0.0611772	0.545584
RNGTT	159.741	-0.237331	0.126888	1.87039	0.0614298	0.547322
ABT1	167.277	-0.222363	0.118943	1.8695	0.0615533	0.54805
HMOX1	2651.69	-0.323464	0.173055	1.86914	0.061603	0.548121
LGI2	14.7422	-0.391026	0.209292	1.86833	0.0617168	0.548761
MDH2	1048.27	0.162107	0.0868077	-1.86743	0.0618419	0.549501
CCNB2	27.0832	-0.433644	0.232345	1.86638	0.0619882	0.550429
TNFAIP8L3	85.7231	0.302712	0.162247	-1.86575	0.0620767	0.550841
NPC1	2120.88	-0.358643	0.19235	1.86453	0.0622474	0.551838
RFTN1	1239.13	-0.291832	0.156533	1.86435	0.0622731	0.551838
CTPS2	135.455	-0.286724	0.15385	1.86366	0.0623694	0.552318
PRUNE2	954.917	-0.350734	0.188239	1.86324	0.0624289	0.552473
LOC645513	87.3805	-0.333285	0.178918	1.86278	0.0624932	0.552669
ARL13B	189.237	-0.259888	0.139579	1.86194	0.062611	0.553338
SRSF8	428.936	-0.26097	0.140201	1.8614	0.0626872	0.553638
ZBTB39	102.647	-0.296951	0.159588	1.86073	0.0627823	0.554106
LRRC37BP1	210.276	-0.207701	0.111653	1.86023	0.0628524	0.554351
IVNS1ABP	1041.25	-0.212452	0.114239	1.85973	0.0629243	0.554613
IKBKB	419.216	-0.232069	0.124861	1.85863	0.0630802	0.555395
MTCL1	290.106	-0.393692	0.211833	1.8585	0.0630977	0.555395
AGA	256.906	0.273157	0.147022	-1.85794	0.0631776	0.555726
CCDC12	177.723	0.21658	0.116794	-1.85438	0.0636849	0.557598
DPY19L4	637.036	-0.196925	0.106208	1.85414	0.0637191	0.557598
GNAI3	947.562	-0.16444	0.0886333	1.85528	0.0635558	0.557598
INPP5A	206.012	-0.26208	0.141355	1.85406	0.0637303	0.557598
MPRIP	2742.83	-0.168503	0.090784	1.85609	0.0634408	0.557598
RMND5B	156.039	-0.254729	0.137352	1.85458	0.0636563	0.557598
SYNE3	143.196	-0.427114	0.230235	1.85512	0.0635785	0.557598
TTL	641.82	-0.249009	0.134245	1.85489	0.0636122	0.557598
IFNGR2	984.029	0.254509	0.137295	-1.85374	0.063776	0.557626
BDNF-AS	89.1055	0.367472	0.198366	-1.8525	0.0639542	0.558194
GDE1	753.578	-0.142698	0.0770345	1.85239	0.0639693	0.558194
NXF1	1125.15	0.27609	0.149006	-1.85288	0.0638992	0.558194
TSHZ3	506.44	-0.191124	0.103193	1.8521	0.0640112	0.558194
ARSA	1095.16	0.173458	0.0936938	-1.85133	0.0641217	0.558443
RAPGEFL1	46.1434	0.365762	0.197569	-1.85131	0.0641247	0.558443
DOCK5	414.711	-0.282268	0.152641	1.84922	0.0644258	0.55995
HAUS7	250.002	0.2282	0.123384	-1.84951	0.0643845	0.55995
PTDSS2	373.201	0.171461	0.0926915	-1.8498	0.0643425	0.55995
MBNL3	78.0432	-0.33764	0.182684	1.84822	0.0645711	0.560841
ZDHHC24	142.236	0.252624	0.136725	-1.84768	0.0646489	0.561145
NACAP1	20.9182	0.412093	0.223175	-1.8465	0.0648199	0.561887
RHBDF1	1018.07	-0.352217	0.190738	1.84661	0.0648043	0.561887
H1F0	2034.49	0.176995	0.0959206	-1.84522	0.0650049	0.562661
PPP1R35	135.967	0.261884	0.141988	-1.84441	0.0651236	0.562661
TOR1AIP1	1402.74	0.151083	0.0818891	-1.84498	0.0650412	0.562661
ZNF562	228.312	0.239054	0.129598	-1.84459	0.0650976	0.562661
ZNF606	67.7066	-0.335789	0.182029	1.8447	0.065081	0.562661
ADAMTS9	67.1218	0.419608	0.227824	-1.8418	0.0655038	0.56335
CLASP2	379.257	-0.203325	0.110328	1.84291	0.0653426	0.56335
ECHS1	685.292	0.188836	0.10246	-1.84303	0.0653246	0.56335
FAM89B	627.892	-0.276329	0.149963	1.84265	0.0653804	0.56335
MIER1	591.195	-0.189237	0.102654	1.84345	0.0652627	0.56335
PART1	16.5756	-0.390098	0.211781	1.84198	0.0654774	0.56335
RNF217	255.58	-0.176319	0.0957164	1.8421	0.0654605	0.56335
PIGU	169.455	0.275466	0.149625	-1.84104	0.0656161	0.563946
DDRGK1	381.622	0.212296	0.115491	-1.8382	0.0660323	0.56468
FKBP4	473.018	0.182484	0.099236	-1.83889	0.0659309	0.56468
GATAD2A	762.35	-0.136935	0.0745321	1.83726	0.0661715	0.56468
HNMT	475.539	0.399917	0.217454	-1.83909	0.0659019	0.56468
LRRC8E	97.7838	0.266121	0.144794	-1.83793	0.0660731	0.56468
MARCH2	175.517	-0.266789	0.145235	1.83695	0.0662178	0.56468
MBNL1	2298.16	-0.306699	0.166883	1.83781	0.0660911	0.56468
MFSD9	60.081	0.307394	0.167227	-1.83818	0.0660358	0.56468
NKD2	207.742	-0.381758	0.207792	1.83722	0.0661781	0.56468
PODXL2	28.0249	-0.380317	0.206757	1.83943	0.0658513	0.56468
TRAPPC6B	271.363	-0.222056	0.120802	1.83818	0.0660353	0.56468
VEZT	597.815	-0.156012	0.0849231	1.8371	0.0661956	0.56468
CDC27	828.219	-0.158932	0.0865396	1.83652	0.0662801	0.564844
ATP5H	623.416	0.166998	0.0909964	-1.83521	0.0664744	0.565252
EGF	14.5972	0.43184	0.235331	-1.83504	0.0665003	0.565252
LINC00888	21.3742	0.413618	0.225327	-1.83563	0.0664122	0.565252
NUPL1	457.478	0.222087	0.120999	-1.83545	0.0664391	0.565252
ARIH2OS	58.3846	0.315697	0.172155	-1.8338	0.0666838	0.565472
CHCHD10	61.6328	0.426598	0.232754	-1.83283	0.0668277	0.565472
CTDSPL	474.036	-0.301783	0.164581	1.83365	0.0667058	0.565472
FAM171B	358.585	-0.226653	0.123585	1.83399	0.0666559	0.565472
PHF14	393.362	-0.185018	0.100931	1.8331	0.0667874	0.565472
RNF14	356.876	-0.208372	0.113608	1.83413	0.0666343	0.565472
SETDB2	139.815	-0.282836	0.154269	1.83339	0.0667441	0.565472
HIP1	806.781	-0.238555	0.130179	1.83251	0.0668762	0.565517
TNKS	900.252	-0.142508	0.0777931	1.83188	0.0669688	0.565936
CNNM4	158.057	0.248502	0.135758	-1.83047	0.067179	0.565982
FPGS	629.148	0.1741	0.0951125	-1.83046	0.0671811	0.565982
MAP7	23.6139	0.4202	0.229442	-1.8314	0.067041	0.565982
OPTN	1392.55	0.279811	0.152835	-1.8308	0.0671297	0.565982
ZBTB7B	429.475	0.229278	0.125261	-1.8304	0.0671899	0.565982
GAS2L3	40.2925	-0.391089	0.213763	1.82954	0.0673184	0.566578
TMEM259	1646.98	0.156063	0.0853108	-1.82935	0.067347	0.566578
CASP6	140.812	-0.245132	0.134031	1.82892	0.0674116	0.566758
HMGA1	2660.01	-0.35953	0.19674	1.82744	0.067634	0.567627
HOOK3	956.309	-0.130442	0.0713604	1.82794	0.0675588	0.567627
SLC5A2	260.625	0.194564	0.106472	-1.82737	0.0676446	0.567627
COG6	390.509	-0.193046	0.105692	1.82649	0.0677759	0.56764
EMC4	607.626	0.160684	0.0879674	-1.82663	0.0677558	0.56764
LOC101927780	18.1153	0.396438	0.217008	-1.82683	0.0677246	0.56764
LOC101927027	112.197	-0.270108	0.147993	1.82514	0.0679796	0.568983
C10orf2	79.6733	0.290183	0.159021	-1.8248	0.0680307	0.569047
NAT14	289.32	0.186916	0.102473	-1.82406	0.0681431	0.569624
ATP9A	1379.21	-0.293991	0.161222	1.82352	0.0682245	0.569941
PCBP2	3288.88	0.105099	0.0576748	-1.82227	0.0684142	0.571056
RNF219	131.511	-0.274621	0.150719	1.82207	0.0684449	0.571056
LMF2	1371.4	0.192622	0.105747	-1.82154	0.0685249	0.57136
KIAA1109	1513.8	-0.128212	0.0704008	1.82117	0.0685812	0.571467
EMILIN2	20.3536	0.405547	0.222764	-1.82052	0.0686793	0.571516
EPB41L2	1148.07	-0.39629	0.217778	1.8197	0.0688049	0.571516
GALNT7	327.84	-0.257347	0.141402	1.81996	0.0687644	0.571516
NYNRIN	301.958	-0.364245	0.200126	1.82008	0.0687469	0.571516
TTYH3	3558.52	0.281133	0.154429	-1.82047	0.0686873	0.571516
FOSB	15355.6	0.389263	0.213961	-1.81932	0.0688631	0.571638
IL17D	44.2906	-0.417243	0.229394	1.81889	0.0689277	0.571649
PARP3	418.434	0.16795	0.0923505	-1.81862	0.0689701	0.571649
SPAG1	43.0405	0.42597	0.234268	-1.8183	0.0690181	0.571649
WDFY3-AS2	53.9645	-0.344301	0.189367	1.81817	0.0690386	0.571649
ARMCX3	1378.3	-0.105754	0.058192	1.81733	0.0691659	0.571928
ESYT2	1896.07	-0.181952	0.100123	1.81728	0.0691743	0.571928
UBE2E3	995.79	-0.264062	0.145322	1.81709	0.0692032	0.571928
C9orf91	119.051	0.260831	0.143605	-1.8163	0.0693239	0.572565
C1QTNF9B-AS1	28.4999	-0.425402	0.23435	1.81524	0.0694869	0.573432
TJAP1	327.103	0.169403	0.0933326	-1.81505	0.0695161	0.573432
LACC1	1300.12	0.37463	0.206505	-1.81414	0.0696558	0.573862
TCIRG1	877.467	0.224715	0.12385	-1.81442	0.0696129	0.573862
PLAC9	317.816	-0.31046	0.171238	1.81304	0.0698262	0.574905
ZMIZ2	881.199	0.15302	0.0844826	-1.81126	0.0701003	0.5768
FOXQ1	48.3765	-0.424427	0.234762	1.8079	0.0706222	0.577114
FST	883.985	0.374766	0.207109	-1.80951	0.0703719	0.577114
H1FX	1340.52	0.165033	0.0912494	-1.80859	0.0705143	0.577114
LDLRAP1	270.258	0.266667	0.147273	-1.8107	0.0701875	0.577114
MATN2	895.651	-0.401355	0.221965	1.80819	0.0705766	0.577114
MRVI1	194.95	-0.423309	0.234142	1.80792	0.0706191	0.577114
RAI14	1413.57	-0.242974	0.134395	1.80791	0.0706211	0.577114
TRIB1	1473.7	0.416065	0.230025	-1.80878	0.0704851	0.577114
TSPAN18	236.487	-0.364531	0.201533	1.80879	0.0704831	0.577114
TYRO3	110.944	-0.405122	0.223988	1.80868	0.0705007	0.577114
XPR1	637.225	0.17141	0.0946788	-1.81043	0.0702288	0.577114
UBA7	521.283	0.191157	0.105812	-1.80658	0.0708281	0.578436
MYBBP1A	572.339	0.213267	0.118173	-1.80471	0.0711199	0.580459
LIN7C	281.273	-0.25165	0.139535	1.80349	0.0713107	0.580618
LINC00938	92.9696	-0.310955	0.172417	1.80351	0.0713086	0.580618
OXR1	688.757	-0.216118	0.119835	1.80346	0.0713164	0.580618
TTC37	1395.02	-0.14601	0.0809285	1.80419	0.0712019	0.580618
LINC00883	98.9585	-0.328677	0.182286	1.80308	0.0713754	0.580738
ANKEF1	44.3743	0.415448	0.23046	-1.80269	0.0714373	0.580882
TDO2	91.7016	0.424221	0.235398	-1.80215	0.0715222	0.581212
CAMKK2	610.712	-0.239082	0.132833	1.79987	0.071882	0.581382
DKK3	2670.5	-0.278626	0.154812	1.79977	0.0718976	0.581382
FGFR1OP	214.429	0.221054	0.122782	-1.80039	0.0717996	0.581382
KLF3-AS1	79.6545	-0.27366	0.151926	1.80127	0.0716603	0.581382
MAP3K6	473.991	-0.258457	0.143557	1.80037	0.0718022	0.581382
SETD1A	418.991	0.178445	0.0991273	-1.80016	0.0718347	0.581382
UCKL1	313.159	0.203412	0.112984	-1.80037	0.0718027	0.581382
ZNF30	29.7877	-0.392479	0.218066	1.79981	0.0718904	0.581382
GATA6	179.325	0.412081	0.229214	-1.7978	0.0722082	0.582266
MANF	729.316	0.308749	0.171749	-1.79767	0.0722287	0.582266
PLXDC1	319.532	-0.423544	0.235501	1.79848	0.0721009	0.582266
RUNDC1	174.399	-0.263295	0.146418	1.79824	0.0721384	0.582266
ZNF225	48.3886	-0.328367	0.182619	1.7981	0.0721608	0.582266
CALM1	2717.14	-0.226836	0.126231	1.79699	0.0723368	0.58278
SASH1	981.141	-0.260238	0.144945	1.79543	0.0725844	0.583975
SIKE1	360.686	-0.225016	0.125322	1.7955	0.072574	0.583975
STARD13	425.427	0.337008	0.187725	-1.79522	0.0726186	0.583975
MTMR11	239.589	-0.328219	0.182957	1.79396	0.0728188	0.585226
ISCU	1136.29	-0.136745	0.0762567	1.79322	0.0729374	0.585821
LOC101243545	2312.78	0.154382	0.0861784	-1.79142	0.0732258	0.587418
MFN2	951.044	0.123383	0.0688722	-1.79148	0.0732163	0.587418
SP110	153.752	-0.240538	0.134309	1.79094	0.0733031	0.587678
STARD4-AS1	290.92	-0.294068	0.164307	1.78975	0.0734939	0.588848
GBP1	493.467	0.256418	0.14336	-1.78864	0.0736734	0.589567
PLBD2	1676.22	0.196006	0.10958	-1.7887	0.0736639	0.589567
ARHGEF17	1623.72	-0.1439	0.0805232	1.78706	0.0739282	0.589835
HS1BP3	276.234	-0.257409	0.144042	1.78704	0.0739316	0.589835
LOC730183	29.1662	0.400317	0.224012	-1.78704	0.0739312	0.589835
STRBP	70.6568	-0.42082	0.235481	1.78706	0.073927	0.589835
ZNF549	92.1227	-0.291857	0.163285	1.7874	0.0738721	0.589835
FLJ44635	145.448	0.27178	0.152108	-1.78676	0.0739766	0.589836
EIF2B1	429.506	-0.16132	0.0903122	1.78624	0.0740599	0.590141
NUCB1	4809.61	0.174589	0.0977701	-1.78571	0.074147	0.590477
DPP7	1897.56	0.209412	0.117344	-1.7846	0.0743269	0.591551
KSR1	177.029	0.419702	0.235242	-1.78413	0.0744032	0.591798
TAF5	77.0675	-0.296079	0.166006	1.78355	0.0744973	0.592188
UGDH	1367.74	-0.150189	0.0842347	1.78298	0.0745891	0.592559
CNIH3	430.059	-0.419688	0.235473	1.78232	0.0746976	0.59292
ZNF37BP	318.141	-0.225067	0.12629	1.78215	0.0747249	0.59292
GLTSCR1	208.092	0.201592	0.113161	-1.78146	0.0748365	0.593447
MMD	199.989	0.348398	0.195758	-1.77974	0.0751189	0.595327
CCDC94	137.814	0.251488	0.141366	-1.77899	0.0752416	0.595939
TMSB4X	11389.2	0.235254	0.132293	-1.77828	0.0753573	0.596495
EIF3I	1303.49	0.133544	0.0752307	-1.77512	0.075878	0.599098
FPR1	14.7805	0.404916	0.228043	-1.77561	0.0757969	0.599098
PTGES2	374.401	0.185214	0.104327	-1.77531	0.0758462	0.599098
ZIK1	61.0723	-0.338498	0.190714	1.7749	0.0759143	0.599098
ZSWIM5	36.8656	0.412461	0.232381	-1.77493	0.0759095	0.599098
WDR82	1358.58	-0.107276	0.0604525	1.77455	0.0759722	0.599194
USPL1	157.77	-0.219181	0.123582	1.77356	0.0761363	0.600128
ABCB10	132.28	-0.295114	0.166755	1.76975	0.0767696	0.601374
CYTH1	219.864	-0.220667	0.124725	1.76922	0.0768572	0.601374
GYG1	430.09	-0.214778	0.121321	1.77032	0.0766737	0.601374
LOC646626	65.6867	-0.343906	0.194209	1.77081	0.0765926	0.601374
LRRC8B	91.9933	0.329995	0.186291	-1.7714	0.076495	0.601374
NRP2	2755.25	0.378611	0.21382	-1.7707	0.0766098	0.601374
PHKB	871.617	-0.144923	0.0818684	1.77019	0.0766956	0.601374
PRR5L	121.547	-0.331561	0.187311	1.77011	0.0767095	0.601374
RSBN1L	167.333	-0.227022	0.128273	1.76984	0.076754	0.601374
SEC61B	633.101	0.18054	0.101892	-1.77187	0.0764168	0.601374
SKI	2252.87	-0.176282	0.099621	1.76952	0.0768063	0.601374
SMIM13	191.563	0.210973	0.11926	-1.76902	0.0768901	0.601374
TCEAL4	689.565	-0.147521	0.0833406	1.7701	0.0767109	0.601374
AHNAK	25662.4	-0.305639	0.172983	1.76688	0.0772487	0.601738
ASPH	5482.71	0.253351	0.143583	-1.76449	0.0776501	0.601738
ATRX	1418.34	-0.172241	0.0976751	1.76341	0.0778318	0.601738
C18orf8	368.725	-0.293146	0.166233	1.76347	0.0778221	0.601738
CKAP5	988.215	-0.194856	0.110445	1.76429	0.0776832	0.601738
CTSD	17900	0.365305	0.207088	-1.76401	0.0777305	0.601738
DENND1A	269.008	0.280171	0.158826	-1.76401	0.0777302	0.601738
DHCR24	1122.89	0.395238	0.223846	-1.76566	0.0774522	0.601738
EMP1	7193.68	-0.309906	0.175489	1.76596	0.0774019	0.601738
HELB	25.8234	0.387896	0.21978	-1.76493	0.0775758	0.601738
HMG20A	384.246	-0.153397	0.0869956	1.76328	0.0778536	0.601738
HMGB1	1270.36	-0.179368	0.101674	1.76415	0.0777072	0.601738
KIAA0825	56.1128	-0.337316	0.190835	1.76758	0.0771314	0.601738
MRPS5	274.787	0.219139	0.124168	-1.76486	0.0775868	0.601738
NCKIPSD	204.84	0.234256	0.132507	-1.76788	0.0770812	0.601738
OSBPL10	168.78	-0.393718	0.223163	1.76426	0.0776883	0.601738
PANK1	74.7849	0.29374	0.166428	-1.76497	0.0775692	0.601738
SAMD9L	378.831	-0.210329	0.119133	1.7655	0.0774806	0.601738
SYTL2	199.044	-0.357551	0.202322	1.76724	0.0771884	0.601738
TMEM194B	85.9554	0.327595	0.185655	-1.76454	0.0776419	0.601738
COL25A1	124.539	0.381305	0.216634	-1.76013	0.078385	0.603004
COX5B	594.582	0.231151	0.131288	-1.76065	0.0782979	0.603004
EPHA5	47.1056	-0.395022	0.224265	1.76141	0.0781695	0.603004
GANAB	5436.32	0.262176	0.148812	-1.7618	0.0781038	0.603004
KIAA1549L	277.025	-0.27255	0.154818	1.76045	0.078331	0.603004
SRCAP	1450.82	0.179779	0.102114	-1.76057	0.078311	0.603004
TLCD2	191.965	-0.303999	0.172706	1.76021	0.0783728	0.603004
TSSC4	279.999	0.171553	0.0974437	-1.76054	0.0783166	0.603004
ZBTB40	434.882	0.180546	0.102603	-1.75965	0.0784665	0.603277
UBE4A	695.005	-0.135015	0.0767483	1.75919	0.078545	0.603527
GPR88	363.598	0.395968	0.225133	-1.75882	0.0786087	0.603663
CCNG2	540.214	-0.276391	0.157228	1.7579	0.0787652	0.604512
PPCDC	41.4063	-0.347701	0.197919	1.75678	0.0789554	0.605003
TSPAN32	61.5204	0.345032	0.196408	-1.75671	0.0789676	0.605003
WDR66	15.8083	0.413738	0.235486	-1.75695	0.0789256	0.605003
MED28	310.41	-0.204747	0.116599	1.75599	0.0790908	0.605458
TRIM45	49.752	-0.367658	0.209394	1.75582	0.0791191	0.605458
C20orf24	101.315	0.292721	0.1668	-1.75492	0.0792729	0.606132
GALT	186.556	0.224484	0.127928	-1.75476	0.0792997	0.606132
ARHGEF28	304.87	0.36594	0.208689	-1.75351	0.0795137	0.606509
NACA2	108.346	0.264702	0.150923	-1.75389	0.0794501	0.606509
PTRH2	136.72	0.230514	0.131467	-1.7534	0.0795338	0.606509
VPS41	744.043	-0.187628	0.106988	1.75372	0.0794777	0.606509
C2orf76	69.6031	-0.315331	0.179891	1.75289	0.0796202	0.606815
KCTD7	308.411	-0.267328	0.152612	1.75168	0.0798285	0.60805
BCL2L1	833.587	-0.249265	0.142515	1.74905	0.0802827	0.608319
CD44	9438.86	0.298675	0.170668	-1.75003	0.0801125	0.608319
DESI2	654.648	-0.251183	0.143636	1.74875	0.0803346	0.608319
DPY19L1	660.772	0.178264	0.101922	-1.74902	0.0802869	0.608319
FNBP1L	310.635	-0.224998	0.128679	1.74852	0.0803738	0.608319
GMFB	729.171	-0.224763	0.128418	1.75025	0.0800758	0.608319
MED20	156.66	-0.225239	0.12872	1.74985	0.080145	0.608319
MKRN1	758.307	-0.147727	0.0843663	1.75102	0.0799425	0.608319
NMD3	547.932	-0.17535	0.100265	1.74887	0.0803126	0.608319
SCAND1	454.862	0.144817	0.0827203	-1.75069	0.0799998	0.608319
SMNDC1	271.099	-0.179131	0.102421	1.74897	0.0802956	0.608319
PDLIM4	847.371	0.255325	0.146086	-1.74777	0.080504	0.608559
THNSL1	70.5374	0.279184	0.159759	-1.74754	0.0805445	0.608559
VOPP1	646.066	-0.240616	0.137647	1.74807	0.0804524	0.608559
NAT6	43.3724	-0.325731	0.186502	1.74653	0.0807188	0.609524
GNPDA2	183.894	-0.300457	0.172219	1.74462	0.0810504	0.611325
GPATCH11	143.168	-0.212067	0.121544	1.74477	0.0810245	0.611325
ZNF471	117.052	-0.26175	0.150061	1.74429	0.0811084	0.611411
REPIN1	627.276	0.252129	0.144646	-1.74308	0.0813196	0.612652
FAM220A	207.231	-0.205246	0.117834	1.74182	0.0815395	0.613807
ZC3H13	761.325	-0.148946	0.0855191	1.74167	0.0815665	0.613807
ASB14	62.2101	-0.294105	0.168948	1.74081	0.0817176	0.61389
CFAP44	296.913	0.371117	0.213132	-1.74125	0.0816392	0.61389
GLS	1954.51	-0.290462	0.166881	1.74054	0.0817646	0.61389
KCNMB4	14.4104	-0.408833	0.234888	1.74054	0.0817636	0.61389
SIRPB1	28.6353	0.409785	0.235506	-1.74002	0.0818559	0.614224
BTAF1	648.655	0.18154	0.104394	-1.73899	0.0820365	0.615227
C22orf46	247.812	0.212275	0.122167	-1.73759	0.0822834	0.616726
ARF1	3470.36	0.140126	0.0807185	-1.73599	0.0825658	0.617081
KLF6	3650.16	-0.278392	0.160355	1.73609	0.0825472	0.617081
SAMD4B	1270.98	-0.138501	0.0797492	1.73671	0.082438	0.617081
STAM2	557.011	-0.166249	0.0957101	1.737	0.0823864	0.617081
WASF2	1884.64	-0.18388	0.105891	1.73651	0.0824745	0.617081
KCNN4	237.61	-0.408262	0.235256	1.73539	0.0826713	0.617517
NCOA7	967.452	0.396189	0.228385	-1.73474	0.0827863	0.618024
KLHDC2	455.796	-0.155695	0.0898365	1.73309	0.0830789	0.619504
MORN1	52.3333	0.37176	0.214483	-1.73328	0.0830452	0.619504
HNRNPLL	411.358	-0.15714	0.0907654	1.73128	0.0834017	0.621558
TRAK2	877.062	-0.18318	0.105898	1.72978	0.0836697	0.623202
COX10	95.4528	0.287039	0.166057	-1.72856	0.0838886	0.624477
THBD	23.9322	-0.373127	0.215938	1.72794	0.0839997	0.62495
SYNPO2	158.64	-0.394121	0.228148	1.72748	0.0840807	0.625198
CES1	40.7273	0.315386	0.18261	-1.7271	0.08415	0.625359
CYP1B1	11072	0.398307	0.23071	-1.72644	0.0842686	0.625886
RTN4RL1	46.9692	-0.40094	0.232309	1.72589	0.0843673	0.626265
PRMT1	887.25	0.213486	0.123731	-1.7254	0.0844561	0.62657
IFT140	495.766	0.165208	0.0957962	-1.72458	0.0846026	0.626948
KLHL5	783.457	0.180403	0.104601	-1.72468	0.0845844	0.626948
FBXO31	388.52	-0.188682	0.109445	1.72399	0.0847095	0.627386
CLDND1	740.012	0.243406	0.141209	-1.72372	0.0847577	0.627389
EHMT1	479.326	-0.159384	0.0925176	1.72275	0.0849343	0.628342
NFKBIB	204.002	0.197163	0.114471	-1.72238	0.085	0.628473
SLC35G1	30.7538	-0.359398	0.208816	1.72112	0.0852286	0.629809
RWDD1	404.992	-0.174066	0.101186	1.72026	0.0853858	0.630615
SMARCA5	1321.08	-0.128556	0.0747481	1.71986	0.0854581	0.630794
NBEAL1	301.87	-0.175647	0.102174	1.71911	0.0855952	0.631451
NOL8	354.5	-0.186652	0.108606	1.71863	0.0856825	0.63174
LOC101241902	17.4269	0.390693	0.227376	-1.71827	0.0857482	0.631869
NUDT21	857.933	-0.150886	0.0878374	1.71779	0.0858353	0.632156
AHCY	687.283	0.14768	0.086074	-1.71573	0.0862109	0.632438
CCNY	933.592	-0.245607	0.14339	1.71286	0.0867383	0.632438
CHCHD4	75.6515	0.269887	0.157447	-1.71414	0.0865025	0.632438
CLSTN3	563.725	0.309497	0.180372	-1.71588	0.0861834	0.632438
DOK3	27.1764	0.40168	0.234446	-1.71332	0.086654	0.632438
DVL2	641.875	-0.139301	0.0813197	1.71301	0.0867109	0.632438
FKBP1A	1556.85	-0.199564	0.1163	1.71593	0.0861742	0.632438
GNA13	571.288	-0.275806	0.160829	1.71491	0.0863621	0.632438
GPC1	1850.09	-0.269002	0.156913	1.71434	0.0864661	0.632438
ITPRIPL2	1600.92	-0.215132	0.125291	1.71705	0.0859696	0.632438
KLC1	1280.78	-0.210962	0.12297	1.71556	0.0862431	0.632438
LRRCC1	85.7685	-0.301038	0.175736	1.71301	0.0867114	0.632438
MTHFD2L	28.3085	0.382011	0.22274	-1.71505	0.0863354	0.632438
MTMR6	459.672	-0.22097	0.128995	1.71301	0.0867109	0.632438
SLC35F5	721.178	-0.149236	0.0871275	1.71285	0.0867409	0.632438
SNHG1	175.567	0.281556	0.164349	-1.71316	0.0866832	0.632438
VCP	3016.94	0.120679	0.0703368	-1.71573	0.0862123	0.632438
WFDC21P	37.9528	0.360266	0.209929	-1.71613	0.0861381	0.632438
SSR1	2199.06	0.110462	0.064509	-1.71235	0.0868331	0.632758
ATL3	1338.17	-0.18471	0.107917	1.71158	0.0869738	0.63308
GLTPD2	18.6732	0.402917	0.235398	-1.71164	0.0869632	0.63308
FAM71E1	228.194	0.287257	0.167982	-1.71005	0.0872572	0.633446
FKBP10	6587.3	0.308263	0.180253	-1.71017	0.0872347	0.633446
SERTAD2	1628.68	-0.227371	0.132974	1.70989	0.0872868	0.633446
SUPT16H	1142.74	-0.113184	0.0662297	1.70896	0.0874584	0.633446
TBC1D19	238.599	-0.334463	0.195701	1.70905	0.0874419	0.633446
TLN2	704.332	-0.215207	0.125783	1.71094	0.0870922	0.633446
TPM4	15987.1	-0.193191	0.112999	1.70967	0.0873268	0.633446
TRIP10	648.006	0.173097	0.101274	-1.7092	0.0874138	0.633446
YWHAZ	3825.49	-0.110198	0.0644385	1.71013	0.0872417	0.633446
ATG2A	417.079	0.180991	0.105995	-1.70754	0.0877226	0.633611
FADS1	2147.79	0.396714	0.232286	-1.70787	0.08766	0.633611
PRKAR1B	96.3111	-0.316522	0.185272	1.70842	0.0875591	0.633611
SOCS3	2380.01	0.262779	0.153876	-1.70773	0.0876867	0.633611
TVP23C	65.7367	0.311799	0.182536	-1.70815	0.0876089	0.633611
LOC553103	18.4572	0.401854	0.235381	-1.70725	0.0877761	0.633649
ZBTB2	208.821	-0.189203	0.110851	1.70683	0.0878536	0.63386
LOC93622	139.096	-0.246674	0.144563	1.70635	0.0879436	0.63416
INAFM2	118.419	-0.255751	0.149981	1.70523	0.0881518	0.634271
LZTS2	1107.8	-0.208851	0.122455	1.70554	0.0880936	0.634271
PTPRJ	171.507	0.230661	0.135233	-1.70565	0.0880734	0.634271
SFPQ	2162.02	0.183962	0.107882	-1.70523	0.0881523	0.634271
BCL9L	1616.62	0.216436	0.127085	-1.70309	0.0885516	0.635034
CALCOCO1	1232.74	-0.175566	0.103051	1.70367	0.0884427	0.635034
CD72	21.389	-0.373277	0.219308	1.70207	0.0887422	0.635034
HFE	177.734	0.237496	0.139506	-1.70241	0.0886784	0.635034
METTL21A	78.6805	0.297055	0.174469	-1.70263	0.0886379	0.635034
MIA3	1077.82	0.16948	0.099497	-1.70337	0.0884987	0.635034
SCFD2	260.763	-0.264953	0.155473	1.70418	0.0883477	0.635034
SLC26A1	165.23	0.279451	0.164095	-1.70298	0.0885713	0.635034
SYVN1	645.353	0.236406	0.138875	-1.7023	0.0886999	0.635034
TCF4	1612.46	-0.337335	0.19816	1.70234	0.0886916	0.635034
ALG2	436.125	0.173106	0.101761	-1.7011	0.0889243	0.635268
CAPN2	5456.19	-0.233942	0.137564	1.70061	0.0890169	0.635268
KBTBD4	226.151	-0.174526	0.102608	1.7009	0.0889623	0.635268
KCTD18	226.123	-0.21579	0.12682	1.70155	0.0888407	0.635268
TP53INP2	758.591	0.355955	0.209284	-1.70083	0.0889754	0.635268
DERL2	330.523	0.180603	0.10634	-1.69836	0.0894391	0.636218
DUOX1	15.8987	-0.394409	0.232335	1.69758	0.0895863	0.636218
GRAMD1A	858.609	0.24478	0.144152	-1.69807	0.0894938	0.636218
HERC5	16.3024	-0.39518	0.232771	1.69772	0.0895603	0.636218
KCTD11	228.709	0.232477	0.136845	-1.69884	0.0893503	0.636218
MFF	593.955	0.148865	0.0876747	-1.69793	0.089521	0.636218
MLF2	1455.4	0.147516	0.0868226	-1.69905	0.0893106	0.636218
NUDT1	107.505	-0.304083	0.178999	1.69879	0.0893579	0.636218
OGDH	907.749	0.129998	0.0765029	-1.69926	0.0892711	0.636218
PSMC4	596.467	0.135115	0.0796489	-1.69639	0.0898123	0.637478
GTF3C4	239.41	-0.235735	0.13899	1.69606	0.0898748	0.637577
SLC22A5	68.3318	0.322176	0.190023	-1.69546	0.0899882	0.638036
MYEOV2	275.652	-0.213372	0.12587	1.69518	0.090041	0.638066
SGPL1	525.528	0.180348	0.106408	-1.69488	0.090099	0.638132
ABCA2	1414.64	0.149559	0.0882667	-1.6944	0.0901897	0.638146
GSKIP	191.192	-0.236507	0.139585	1.69435	0.0901982	0.638146
DPH3P1	21.664	-0.361329	0.213391	1.69327	0.0904038	0.638571
HOXC8	89.3471	-0.270625	0.159886	1.69261	0.0905304	0.638571
LOC101928489	60.6824	-0.337764	0.199534	1.69277	0.0904999	0.638571
PAK1	236.952	-0.310805	0.18358	1.69302	0.0904515	0.638571
VDR	450.145	0.216195	0.127737	-1.6925	0.0905502	0.638571
VPS8	424.444	-0.176895	0.104488	1.69296	0.090463	0.638571
PQLC3	261.957	-0.248194	0.14668	1.69208	0.0906308	0.638797
SRPX2	1239.18	0.339975	0.200973	-1.69165	0.0907129	0.639032
DDX11L2	17.2439	-0.397924	0.235305	1.6911	0.0908185	0.63909
SPTY2D1-AS1	105.035	-0.292481	0.172931	1.69132	0.0907756	0.63909
VMO1	94.6142	0.262187	0.155067	-1.6908	0.0908747	0.639143
KIAA0922	108.813	-0.24338	0.144034	1.68974	0.0910773	0.639539
RCBTB2	242.268	-0.254259	0.150447	1.69003	0.091023	0.639539
WASF1	235.239	0.175128	0.103628	-1.68996	0.0910357	0.639539
ARID3A	135.755	0.27547	0.163139	-1.68856	0.0913028	0.64078
SLK	937.786	-0.217342	0.128785	1.68764	0.09148	0.64168
CYP7B1	39.8335	0.33959	0.201292	-1.68705	0.091594	0.641994
IL18BP	64.6774	0.330449	0.195891	-1.6869	0.0916226	0.641994
BEND3P3	80.7292	0.251531	0.149267	-1.68511	0.0919676	0.64264
CDC42	1631.64	-0.151567	0.0899698	1.68464	0.0920576	0.64264
DNAJC21	499.086	-0.167511	0.0994296	1.68472	0.092043	0.64264
FBXO3	238.76	-0.197239	0.117073	1.68475	0.0920372	0.64264
IGF2	43.4963	0.386544	0.229439	-1.68474	0.0920396	0.64264
RAP1GDS1	370.608	-0.269214	0.159708	1.68566	0.0918603	0.64264
TAPBPL	232.224	0.385131	0.228548	-1.68512	0.0919654	0.64264
ATP13A3	1239.21	0.185347	0.110092	-1.68357	0.0922653	0.642723
KIF13B	831.471	-0.304262	0.180685	1.68393	0.0921944	0.642723
PIGT	2537.84	0.213391	0.126702	-1.6842	0.0921439	0.642723
TOM1L1	178.49	0.259182	0.153929	-1.68377	0.0922258	0.642723
BPGM	403.387	-0.29248	0.173807	1.68278	0.0924167	0.643095
SNX8	411.949	-0.223369	0.132735	1.68282	0.0924101	0.643095
DDOST	2591.77	0.258275	0.153506	-1.68251	0.0924706	0.643129
CLCF1	350.752	0.364091	0.216549	-1.68133	0.0926989	0.643179
EPHX1	2276.26	-0.271496	0.161457	1.68154	0.0926578	0.643179
FAM171A2	110.94	-0.366712	0.218113	1.6813	0.0927054	0.643179
MYPOP	86.0277	0.25323	0.150599	-1.68149	0.092668	0.643179
OXCT1-AS1	44.9608	-0.326393	0.194142	1.68121	0.0927229	0.643179
LINC00674	643.53	-0.186813	0.111174	1.68036	0.0928867	0.643781
ZNF689	146.446	0.224888	0.133842	-1.68025	0.0929078	0.643781
RBM22	400.449	-0.148768	0.0885862	1.67936	0.0930821	0.643982
TANK	769.527	0.284307	0.1693	-1.67931	0.0930923	0.643982
TNK2	469.854	-0.217945	0.129776	1.67939	0.0930758	0.643982
ZNF300	95.1034	-0.270946	0.161364	1.6791	0.093133	0.643982
LSAMP	76.9163	-0.347481	0.206988	1.67875	0.0932009	0.644112
ASPN	196.295	-0.277655	0.165691	1.67574	0.093789	0.645383
C21orf58	40.3267	-0.327113	0.195228	1.67554	0.0938274	0.645383
CRACR2A	51.6795	0.346499	0.206747	-1.67596	0.0937468	0.645383
EXOSC5	67.7878	0.294957	0.175968	-1.6762	0.0936988	0.645383
FAM118B	162.696	-0.23714	0.141366	1.67749	0.0934464	0.645383
FAM179B	294.471	-0.172021	0.102605	1.67653	0.0936343	0.645383
PLIN4	39.0549	-0.394081	0.235096	1.67626	0.0936878	0.645383
SIPA1	301.134	0.210838	0.12578	-1.67625	0.0936895	0.645383
VDAC1	1119.6	0.143571	0.0855999	-1.67724	0.0934962	0.645383
B3GALNT2	369.798	-0.208183	0.124459	1.6727	0.094386	0.645441
COX6B1	694.988	0.166602	0.0994981	-1.67443	0.0940467	0.645441
CYP11A1	18.5412	0.384428	0.229756	-1.6732	0.0942881	0.645441
CYS1	45.6073	-0.394246	0.235496	1.67411	0.0941096	0.645441
HDAC1	679.517	0.160753	0.0959623	-1.67517	0.0939014	0.645441
HSP90AB1	7539.18	0.105489	0.0630912	-1.672	0.0945244	0.645441
MCOLN3	61.9098	-0.308144	0.184001	1.67469	0.0939953	0.645441
MLKL	81.5561	0.263519	0.157422	-1.67396	0.0941379	0.645441
NR1H3	149.921	0.264152	0.157871	-1.67321	0.0942854	0.645441
PDIK1L	67.0676	-0.268238	0.160254	1.67383	0.094165	0.645441
PIGS	695.663	0.197376	0.118031	-1.67224	0.0944766	0.645441
RPUSD1	171.869	0.236166	0.141112	-1.67361	0.0942068	0.645441
TMTC2	74.4953	0.393879	0.235434	-1.67299	0.0943295	0.645441
ZNF281	708.801	0.265445	0.158726	-1.67235	0.0944557	0.645441
CALD1	11148.3	-0.258047	0.154505	1.67015	0.0948894	0.645729
COX8A	550.684	0.18973	0.113608	-1.67004	0.0949109	0.645729
GNB3	69.6221	-0.2916	0.17451	1.67097	0.0947282	0.645729
IFNAR1	1254.96	0.14972	0.0896494	-1.67006	0.094907	0.645729
NUTF2	539.914	-0.156947	0.0939735	1.67012	0.0948958	0.645729
RALGAPB	859.444	-0.108315	0.0648084	1.6713	0.0946618	0.645729
WDR41	310.021	-0.249297	0.14926	1.67022	0.0948756	0.645729
SMARCD2	514.249	-0.147749	0.0885196	1.66911	0.0950953	0.646648
MKLN1-AS	21.689	0.383788	0.229978	-1.6688	0.0951571	0.646733
PRMT2	1347.34	-0.200893	0.120474	1.66752	0.0954102	0.64799
PSMA2	530.888	0.140316	0.0841543	-1.66737	0.0954407	0.64799
ZNF653	59.7688	0.293915	0.176317	-1.66697	0.0955205	0.648196
ARHGEF10L	470.755	0.242145	0.145485	-1.6644	0.0960322	0.648772
FBLN1	18651.8	0.327729	0.196909	-1.66437	0.0960384	0.648772
FER1L4	161.533	0.385325	0.231322	-1.66575	0.0957629	0.648772
LIX1L	519.164	-0.160304	0.0962204	1.66601	0.0957118	0.648772
LOC101929122	17.4906	0.37076	0.222797	-1.66412	0.0960893	0.648772
PCMTD2	470.83	-0.205933	0.123753	1.66406	0.0960998	0.648772
PLCD1	357.062	-0.315208	0.189413	1.66413	0.0960864	0.648772
TCEANC2	78.123	-0.275999	0.165758	1.66507	0.0958986	0.648772
ZNF585A	115.099	-0.240544	0.144546	1.66414	0.0960847	0.648772
ZNRF3	139.044	0.230285	0.138372	-1.66424	0.0960637	0.648772
LMAN2	1611.67	0.224803	0.13525	-1.66213	0.0964868	0.650716
PA2G4P4	60.5671	0.288686	0.173684	-1.66213	0.0964861	0.650716
LOX	4027.44	0.208657	0.125656	-1.66054	0.0968055	0.650884
LRP3	787.061	-0.218711	0.131626	1.66161	0.0965907	0.650884
NACC2	668.738	0.195596	0.11778	-1.6607	0.0967739	0.650884
PELI1	106.904	0.228654	0.137626	-1.66141	0.096631	0.650884
PIGZ	48.4801	0.292257	0.176003	-1.66053	0.0968087	0.650884
TWIST1	797.786	0.276442	0.166479	-1.66052	0.0968094	0.650884
LSM3	213.9	-0.217612	0.131101	1.65988	0.096939	0.651181
PP2D1	90.6878	-0.264141	0.159139	1.65981	0.0969527	0.651181
ADAMTS6	167.443	0.323795	0.19514	-1.6593	0.097056	0.651208
TMEM177	30.5289	0.33847	0.203961	-1.65948	0.0970191	0.651208
CACNB3	249.486	-0.251435	0.151606	1.65848	0.0972202	0.651644
P3H4	988.424	0.24243	0.14616	-1.65867	0.0971826	0.651644
C1orf122	450.777	0.206123	0.12434	-1.65773	0.0973712	0.65199
GLB1	1142	0.259207	0.156347	-1.6579	0.0973374	0.65199
MMP25	39.9031	0.388407	0.234448	-1.65669	0.0975824	0.652079
PRDX3	889.974	0.196126	0.118355	-1.6571	0.0975001	0.652079
TMEM194A	195.669	-0.224889	0.135746	1.65668	0.0975832	0.652079
URB2	131.469	0.211354	0.127571	-1.65675	0.09757	0.652079
ATHL1	314.088	0.264091	0.159444	-1.65633	0.0976552	0.652228
MINK1	1047.23	-0.126602	0.0764496	1.65602	0.0977172	0.652309
ATF7IP2	45.1238	-0.369293	0.223054	1.65562	0.0977991	0.652524
ATP5B	3538.2	0.222031	0.134154	-1.65505	0.097915	0.652554
DGUOK	240.203	0.180486	0.109122	-1.65399	0.0981302	0.652554
EXTL1	18.1436	-0.336424	0.20338	1.65416	0.0980943	0.652554
FAM160B1	588.305	-0.214269	0.129512	1.65444	0.0980383	0.652554
FUNDC1	98.1954	0.2522	0.152403	-1.65482	0.0979609	0.652554
HERPUD2	351.841	-0.168305	0.101795	1.65337	0.0982556	0.652554
MORC4	328.333	-0.277138	0.167611	1.65346	0.0982375	0.652554
PLA2G4C	39.3863	0.373789	0.226103	-1.65318	0.0982943	0.652554
RASAL2	740.227	-0.177625	0.107462	1.6529	0.0983505	0.652554
STX2	484.213	-0.2171	0.131291	1.65358	0.0982119	0.652554
UBP1	656.659	-0.17887	0.108215	1.65291	0.098349	0.652554
SUMF1	710.248	0.178672	0.108127	-1.65243	0.0984473	0.652866
BZRAP1-AS1	215.63	-0.202256	0.122432	1.65199	0.0985365	0.652871
BZW1	1744.43	0.262456	0.158889	-1.65182	0.0985708	0.652871
RSBN1	199.441	-0.201918	0.122249	1.65169	0.0985973	0.652871
PHYH	312.34	-0.230057	0.139323	1.65125	0.0986878	0.653001
SPNS2	141.185	0.205458	0.124436	-1.65111	0.0987164	0.653001
EVL	342.561	-0.227045	0.137547	1.65068	0.0988049	0.653255
MAP3K3	554.239	-0.193944	0.117511	1.65043	0.0988543	0.653255
TNIP2	331.817	0.16362	0.0991533	-1.65018	0.0989071	0.653275
TMEM255B	91.2241	-0.388024	0.235191	1.64982	0.0989791	0.653421
ACTR2	3523.57	-0.195076	0.118369	1.64803	0.0993458	0.655512
MAGEH1	213.019	0.205644	0.124801	-1.64778	0.0993985	0.655531
EEPD1	129.325	-0.36673	0.222682	1.64688	0.0995829	0.655847
TMEM243	173.585	-0.22889	0.13899	1.64681	0.0995965	0.655847
ZNF528-AS1	31.6379	-0.351988	0.213707	1.64706	0.0995452	0.655847
HERC2	1504.96	0.124212	0.0754478	-1.64633	0.0996959	0.655991
NASP	448.274	0.150566	0.0914618	-1.64622	0.0997182	0.655991
ARHGAP22	1322.14	-0.334106	0.203328	1.64319	0.100344	0.657468
CALM3	2407.16	-0.141235	0.085867	1.64481	0.100009	0.657468
[truncated: 24,218 more rows]

## Sheet: Supplementary Table 6d
Supplementary Table 6 - RNA sequencing of MSC responses to breast cancer secretomes
MDA-Bone vs MDA-WT
Gene Identifiers	mean normalised counts, averaged over all samples from both conditions	log2(MDA-Bone/MDA-WT)	standard error (log2(MDA-Bone/MDA-WT)	Wald statistic	p value	p value (adjusted for multiple testing with the Benjamini-Hochberg procedure)
SLC39A14	6790.22	0.485843	0.0727142	6.68154	2.36441e-11	1.93645e-07
MMP3	3567.46	0.929874	0.160744	5.78481	7.25946e-09	2.97275e-05
FNDC1	9595.87	0.818113	0.158547	5.16008	2.46842e-07	0.00067388
PID1	625.779	0.810709	0.16242	4.99144	5.99307e-07	0.00122708
LDHA	8033.93	0.36999	0.0760646	4.86415	1.14948e-06	0.00145318
PGK1	4258.16	0.4412	0.0909914	4.84881	1.24203e-06	0.00145318
RGAG4	165.787	-0.620432	0.126445	-4.90674	9.26047e-07	0.00145318
PFKP	1008.54	0.478072	0.101891	4.692	2.70551e-06	0.00276977
SLC16A3	3445.83	0.361759	0.0830587	4.35546	1.32785e-05	0.0120834
BNIP3	860.892	0.466831	0.109228	4.27392	1.92068e-05	0.0157304
SLC39A8	728.297	0.628971	0.1497	4.20154	2.65108e-05	0.0197385
MXRA7	2242.31	0.367528	0.0922538	3.98388	6.78e-05	0.042581
TPI1	4174.84	0.36607	0.0922792	3.96698	7.2788e-05	0.042581
TRPA1	326.43	0.570925	0.143253	3.98544	6.7355e-05	0.042581
MTSS1	220.128	-0.624127	0.160432	-3.89028	0.000100128	0.0546698
CXCL5	403.592	0.602482	0.156659	3.84581	0.000120155	0.0615045
IRAK3	232.377	0.558562	0.146881	3.80283	0.000143051	0.0689171
RNF145	821.947	0.333125	0.0895561	3.71973	0.000199433	0.090742
WNT5A	5752.62	0.573533	0.155407	3.69053	0.000223788	0.0964643
CXCL1	3468.08	0.585189	0.159329	3.67284	0.000239868	0.0982258
SLC39A6	1585.11	0.294205	0.0851905	3.45349	0.000553373	0.215816
CXCL6	7289.78	0.513452	0.149313	3.43876	0.000584388	0.217552
STX4	465.42	-0.331184	0.0969279	-3.4168	0.000633608	0.225619
CXCL8	8729.19	0.513219	0.153095	3.35228	0.000801481	0.262565
PLEKHG4	352.282	-0.4235	0.126099	-3.35847	0.000783747	0.262565
KAZN	175.988	-0.452077	0.135891	-3.32676	0.000878634	0.274392
MMP13	40077.6	0.515009	0.155187	3.31863	0.00090459	0.274392
SERPINE2	14242.4	0.441575	0.133494	3.30784	0.000940202	0.275009
HTRA2	687.932	0.269275	0.0826784	3.2569	0.00112638	0.318105
PDE4B	359.365	0.519579	0.161646	3.21429	0.00130768	0.350039
SLC16A1	670.009	0.327462	0.101996	3.21052	0.00132493	0.350039
WDR86	524.171	0.516921	0.16247	3.18163	0.00146447	0.374813
DENND5A	1601.8	0.226585	0.0716215	3.16365	0.00155804	0.386678
TLE3	781.066	0.2796	0.0891534	3.13617	0.00171169	0.412315
MIF	2995.36	0.308714	0.100249	3.07948	0.00207362	0.485228
CRISPLD2	828.843	0.472188	0.15487	3.04893	0.00229661	0.522478
FGFRL1	1414	0.25351	0.0834956	3.03621	0.00239571	0.530293
CDKN1C	231.211	0.452231	0.151441	2.98618	0.00282483	0.608824
TGFBI	21850.1	0.453536	0.152425	2.97548	0.00292533	0.614319
C1QTNF1	1448.69	0.369625	0.12501	2.95677	0.00310879	0.620999
SLC7A5	791.182	0.468815	0.158497	2.95787	0.00309772	0.620999
MOB3C	201.038	-0.368873	0.125602	-2.93684	0.00331578	0.632955
SIRPA	1032.43	0.311239	0.106242	2.92952	0.0033949	0.632955
SOD2	17521.3	0.332333	0.113463	2.929	0.00340049	0.632955
PFKFB3	762.683	0.354555	0.121842	2.90997	0.00361466	0.643566
SRSF9	801.549	0.225569	0.0774723	2.91161	0.0035957	0.643566
LOC284454	828.211	-0.382621	0.133281	-2.87079	0.00409443	0.713476
ADAM9	3096.48	0.210732	0.0739449	2.84985	0.00437395	0.746305
EML4	655.818	-0.228797	0.0814489	-2.80908	0.00496825	0.793998
PDZRN3	1519.77	0.342261	0.121456	2.81799	0.00483251	0.793998
RIN1	578.898	-0.328039	0.116821	-2.80805	0.0049842	0.793998
TRIM8	2423.52	0.178447	0.0636315	2.80439	0.00504126	0.793998
KLF6	2530.91	-0.416174	0.149724	-2.7796	0.00544254	0.837011
MIF-AS1	2927.46	0.299377	0.10788	2.77508	0.00551875	0.837011
PLOD2	6531.66	0.356994	0.129626	2.75404	0.00588649	0.8609
RGS4	296.913	-0.436095	0.158225	-2.75617	0.00584824	0.8609
HERC1	1226.44	-0.189951	0.0691189	-2.74817	0.00599281	0.861073
KIFC3	524.366	0.34875	0.12741	2.73723	0.00619587	0.874899
FSTL1	19389.1	0.340559	0.12502	2.72403	0.00644911	0.895224
AMDHD2	232.122	-0.327883	0.121192	-2.70547	0.00682075	0.91577
HERPUD1	1269.18	0.228606	0.0843998	2.70861	0.00675664	0.91577
TMEM132A	2050.46	0.433035	0.160557	2.69708	0.006995	0.924017
AGTRAP	406.557	0.289708	0.107645	2.69133	0.00711677	0.92518
HIVEP3	204.944	-0.338687	0.127468	-2.65703	0.00788333	0.96524
LPCAT1	502.307	0.293842	0.110018	2.67086	0.00756574	0.96524
SCPEP1	1198.22	-0.205519	0.0773654	-2.65647	0.00789634	0.96524
TMEM132B	265.385	-0.422927	0.158855	-2.66235	0.00775979	0.96524
IL11	1299.37	0.290937	0.11023	2.63936	0.00830636	0.98224
NEAT1	9839.3	-0.418109	0.158838	-2.6323	0.00848089	0.98224
SNAPC1	464.972	0.362247	0.137317	2.63804	0.00833875	0.98224
SVIL	2253.27	-0.378223	0.14376	-2.63093	0.00851515	0.98224
ACSL1	736.157	0.364659	0.138896	2.62541	0.00865443	0.984442
A2M	683.438	-0.0289942	0.107208	-0.270447	0.786816	0.999979
A4GALT	540.886	0.0819612	0.16116	0.508571	0.611053	0.999979
AAAS	349.464	-0.165398	0.108598	-1.52304	0.127749	0.999979
AACS	219.607	0.0546042	0.133975	0.407571	0.683589	0.999979
AAGAB	312.563	0.0610178	0.136797	0.446047	0.655564	0.999979
AAK1	750.864	-0.0101379	0.130063	-0.0779458	0.937871	0.999979
AAMP	699.222	0.124807	0.092538	1.34871	0.177431	0.999979
AAR2	350.006	-0.049773	0.101243	-0.49162	0.622988	0.999979
AARS	1479.3	0.0184723	0.151635	0.12182	0.903041	0.999979
AARS2	175.563	-0.153147	0.151685	-1.00963	0.312672	0.999979
AASDHPPT	304.943	0.121385	0.121322	1.00052	0.317058	0.999979
AASS	341.787	-0.0430702	0.11159	-0.38597	0.699519	0.999979
AATF	335.23	0.017957	0.109199	0.164443	0.869383	0.999979
ABCA1	489.94	0.3087	0.16225	1.90262	0.0570906	0.999979
ABCA13	199.015	-0.284016	0.161776	-1.75562	0.079154	0.999979
ABCA2	1437.31	0.0646935	0.107924	0.599436	0.548882	0.999979
ABCA6	216.234	-3.56257e-05	0.160797	-0.000221557	0.999823	0.999979
ABCA7	196.328	-0.126711	0.137204	-0.923525	0.355734	0.999979
ABCA8	597.839	0.0301941	0.14265	0.211666	0.832368	0.999979
ABCB6	436.479	0.0263036	0.131753	0.199643	0.84176	0.999979
ABCB7	173.091	0.0240475	0.131578	0.182762	0.854985	0.999979
ABCB8	398.463	-0.0174412	0.106858	-0.163218	0.870347	0.999979
ABCC1	1552.35	0.105506	0.118579	0.889756	0.373597	0.999979
ABCC10	293.529	-0.0279354	0.120726	-0.231395	0.817008	0.999979
ABCC3	1198.02	0.203673	0.123597	1.64788	0.0993778	0.999979
ABCC4	504.597	0.212463	0.140225	1.51516	0.129732	0.999979
ABCC5	453.182	-0.138524	0.125799	-1.10115	0.270831	0.999979
ABCD1	187.974	-0.0485102	0.1255	-0.386534	0.699101	0.999979
ABCD3	352.09	0.0397657	0.117702	0.337851	0.735476	0.999979
ABCD4	292.515	-0.00203976	0.111067	-0.0183651	0.985348	0.999979
ABCE1	655.968	0.124971	0.0918276	1.36093	0.173535	0.999979
ABCF2	533.894	-0.0755355	0.107048	-0.705625	0.480422	0.999979
ABCF3	408.037	-0.0658976	0.111532	-0.590839	0.554628	0.999979
ABHD12	421.712	0.116964	0.112224	1.04224	0.297302	0.999979
ABHD13	206.62	0.0936161	0.137532	0.680686	0.49607	0.999979
ABHD14B	472.783	-0.0231037	0.125833	-0.183607	0.854322	0.999979
ABHD17A	408.924	-0.0798745	0.0918689	-0.86944	0.384607	0.999979
ABHD17C	213.74	0.10079	0.160122	0.629458	0.529049	0.999979
ABHD2	2171.22	-0.12521	0.14041	-0.891745	0.37253	0.999979
ABHD4	674.235	2.99585e-06	0.115412	2.59579e-05	0.999979	0.999979
ABHD5	493.966	0.0795885	0.16017	0.496899	0.619261	0.999979
ABHD8	209.261	0.207432	0.140413	1.4773	0.139595	0.999979
ABI1	520.687	-0.0603901	0.0832137	-0.725723	0.468008	0.999979
ABI2	748.538	0.110031	0.101207	1.08718	0.276956	0.999979
ABI3BP	809.022	-0.0106001	0.1155	-0.0917754	0.926876	0.999979
ABL1	3630.24	0.214054	0.114821	1.86423	0.062289	0.999979
ABL2	1359.3	-0.125697	0.162252	-0.774704	0.438514	0.999979
ABR	1345.21	-0.104123	0.119551	-0.870947	0.383783	0.999979
ABTB1	263.743	0.204097	0.12756	1.60001	0.109597	0.999979
ABTB2	220.816	0.182372	0.139461	1.3077	0.190975	0.999979
ACAA1	365.644	-0.00243811	0.130515	-0.0186807	0.985096	0.999979
ACAA2	510.995	0.0404072	0.10591	0.381524	0.702814	0.999979
ACACA	1015.02	-0.0700263	0.12823	-0.546099	0.584998	0.999979
ACACB	177.26	-0.0129735	0.159513	-0.0813324	0.935178	0.999979
ACAD10	271.495	0.0895581	0.158802	0.563959	0.572782	0.999979
ACAD8	205.492	-0.0557802	0.111747	-0.499163	0.617664	0.999979
ACAD9	328.569	0.0171799	0.104246	0.164801	0.869101	0.999979
ACADM	307.105	0.153389	0.134833	1.13762	0.255278	0.999979
ACADS	191.969	0.0887216	0.159892	0.554886	0.578973	0.999979
ACADSB	237.946	0.0917759	0.14801	0.620064	0.535215	0.999979
ACADVL	2786.77	-0.0550064	0.129268	-0.425522	0.670456	0.999979
ACAN	398.522	0.0269881	0.0680678	0.396488	0.691745	0.999979
ACAP2	914.575	0.0142533	0.110697	0.12876	0.897547	0.999979
ACAP3	748.753	-0.169794	0.101333	-1.67561	0.0938147	0.999979
ACAT1	404.941	-0.0232702	0.120652	-0.192871	0.84706	0.999979
ACAT2	335.65	-0.12413	0.138824	-0.894153	0.37124	0.999979
ACBD3	792.053	-0.0970289	0.115025	-0.843543	0.398925	0.999979
ACBD5	254.803	0.051765	0.109782	0.471527	0.637264	0.999979
ACBD6	364.07	0.0122805	0.0946358	0.129766	0.896752	0.999979
ACER3	238.445	-0.0439709	0.138407	-0.317692	0.750719	0.999979
ACIN1	1855.28	-0.0933161	0.141156	-0.661085	0.508558	0.999979
ACLY	2164.45	0.0933371	0.115515	0.80801	0.419085	0.999979
ACO1	1755.48	0.129895	0.15614	0.831913	0.405458	0.999979
ACO2	1157.75	0.13698	0.159087	0.861042	0.389215	0.999979
ACOT13	290.429	0.0516724	0.148849	0.347146	0.728482	0.999979
ACOT2	317.332	0.0219884	0.14181	0.155055	0.876778	0.999979
ACOT7	270.344	-0.0340226	0.160387	-0.212128	0.832007	0.999979
ACOT9	258.121	-0.0115398	0.124182	-0.0929268	0.925962	0.999979
ACOX1	487.502	-0.0434378	0.13017	-0.3337	0.738606	0.999979
ACOX2	160.704	-0.064678	0.144212	-0.448492	0.653798	0.999979
ACOX3	164.241	-0.0453505	0.146426	-0.309716	0.756777	0.999979
ACP1	490.873	0.0518279	0.0901096	0.575164	0.56518	0.999979
ACP2	417.265	0.222346	0.127259	1.74719	0.0806046	0.999979
ACSF2	309.261	-0.0715752	0.142058	-0.503843	0.614371	0.999979
ACSF3	158.959	0.0351729	0.128321	0.2741	0.784008	0.999979
ACSL3	822.352	-0.0153507	0.133568	-0.114928	0.908503	0.999979
ACSL4	7599.55	0.167208	0.154722	1.0807	0.279831	0.999979
ACSS2	242.994	-0.0498337	0.126103	-0.395181	0.692709	0.999979
ACSS3	214.425	0.0477875	0.16151	0.295878	0.767323	0.999979
ACTA2	1213.63	-0.0102403	0.159937	-0.0640273	0.948948	0.999979
ACTA2-AS1	522.35	-0.0331838	0.161703	-0.205214	0.837405	0.999979
ACTB	36234.9	-0.0613336	0.0876861	-0.699468	0.484259	0.999979
ACTG1	45180.7	-0.0478737	0.103718	-0.461574	0.644387	0.999979
ACTL6A	296.876	-0.0212174	0.0954635	-0.222257	0.824114	0.999979
ACTN1	5708.87	-0.0404452	0.126466	-0.319811	0.749111	0.999979
ACTN4	4314.48	0.00646103	0.139654	0.0462647	0.963099	0.999979
ACTR10	592.335	0.0639933	0.103579	0.61782	0.536694	0.999979
ACTR1A	999.333	0.0165713	0.102868	0.161092	0.872021	0.999979
ACTR1B	548.845	-0.0461349	0.113695	-0.40578	0.684904	0.999979
ACTR2	3099.64	0.0230128	0.116856	0.196933	0.84388	0.999979
ACTR3	2187.36	0.00334699	0.0954119	0.0350794	0.972016	0.999979
ACTR8	236.101	0.0539162	0.115858	0.465366	0.64167	0.999979
ACVR1	1076.19	0.0494351	0.0940668	0.525532	0.599214	0.999979
ACVR1B	284.235	-0.0100766	0.144846	-0.0695677	0.944538	0.999979
ACVR2A	329.014	-0.0282464	0.14801	-0.190841	0.84865	0.999979
ADAM10	1744.87	-0.0457431	0.128991	-0.354621	0.722874	0.999979
ADAM12	3434.04	0.0351593	0.156663	0.224426	0.822426	0.999979
ADAM15	888.607	0.0150488	0.138979	0.108281	0.913773	0.999979
ADAM17	673.157	-0.0877932	0.116135	-0.75596	0.449673	0.999979
ADAM19	218.407	-0.0287247	0.144479	-0.198816	0.842406	0.999979
ADAMTS1	3522.81	-0.105274	0.132955	-0.791803	0.428475	0.999979
ADAMTS10	418.064	-0.00301311	0.152508	-0.0197571	0.984237	0.999979
ADAMTS12	290.833	-0.0102246	0.112748	-0.0906855	0.927742	0.999979
ADAMTS2	1181.9	-0.0984486	0.152445	-0.645798	0.51841	0.999979
ADAMTS5	1742	0.30457	0.162268	1.87695	0.0605244	0.999979
ADAMTS6	218.668	0.284941	0.161793	1.76115	0.0782129	0.999979
ADAMTS7	323.854	-0.0864191	0.162467	-0.531919	0.594782	0.999979
ADAMTSL1	983.425	-0.0515762	0.100978	-0.510767	0.609514	0.999979
ADAMTSL4	329.986	-0.0350483	0.159272	-0.220053	0.82583	0.999979
ADAR	2349.74	0.0110923	0.0780108	0.142189	0.886931	0.999979
ADARB1	805.8	-0.0877195	0.162378	-0.540218	0.589047	0.999979
ADAT1	158.238	-0.0421525	0.126068	-0.334363	0.738106	0.999979
ADCK3	256.517	-0.0633902	0.136036	-0.46598	0.64123	0.999979
ADCK4	286.041	-0.0928297	0.12996	-0.714295	0.475045	0.999979
ADCY3	763.513	0.0401176	0.160627	0.249756	0.802776	0.999979
ADCY6	1040.55	-0.0661524	0.105322	-0.628095	0.529942	0.999979
ADCY7	638.338	-0.0249281	0.152377	-0.163595	0.87005	0.999979
ADCY9	512.625	0.0255071	0.149932	0.170125	0.864912	0.999979
ADD1	2212.4	-0.0646306	0.119015	-0.543046	0.587098	0.999979
ADD3	2931.78	0.13053	0.161567	0.807901	0.419148	0.999979
ADH5	1051.69	0.0031456	0.114727	0.0274182	0.978126	0.999979
ADI1	535.366	0.115276	0.135005	0.853867	0.393179	0.999979
ADIPOR1	869.393	0.204891	0.10546	1.94282	0.0520373	0.999979
ADIPOR2	736.197	0.0864921	0.126708	0.68261	0.494853	0.999979
ADIRF	165.017	-0.0406761	0.0978101	-0.415868	0.677507	0.999979
ADK	244.489	-0.0123651	0.127927	-0.0966572	0.922999	0.999979
ADM	1574.06	0.108839	0.138508	0.785797	0.431987	0.999979
ADNP	880.961	0.064398	0.109971	0.585588	0.558152	0.999979
ADNP2	271.568	-0.0135623	0.105294	-0.128804	0.897513	0.999979
ADO	306.764	0.0546245	0.123805	0.441214	0.659058	0.999979
ADORA1	249.033	0.0268158	0.157063	0.170733	0.864434	0.999979
ADPGK	683.583	0.0788091	0.140368	0.561448	0.574492	0.999979
ADPRHL2	217.254	-0.0466248	0.15381	-0.303133	0.761789	0.999979
ADRBK1	617.055	0.122418	0.0928164	1.31893	0.187192	0.999979
ADRM1	750.659	0.0264693	0.104779	0.252621	0.800561	0.999979
ADSL	371.594	-0.0437183	0.115354	-0.378993	0.704693	0.999979
ADSS	766.318	0.157652	0.148306	1.06302	0.287774	0.999979
AEBP1	10835	-0.0654716	0.152264	-0.429986	0.667206	0.999979
AEBP2	316.654	-0.0396166	0.127658	-0.310334	0.756307	0.999979
AEN	842.523	-0.0167427	0.153965	-0.108744	0.913406	0.999979
AES	2309.24	0.105282	0.129087	0.815591	0.414734	0.999979
AFAP1	1439.47	0.192666	0.0988299	1.94947	0.0512396	0.999979
AFF1	478.064	-0.00563881	0.149458	-0.0377283	0.969904	0.999979
AFF2	261.71	0.0150775	0.162377	0.092855	0.926019	0.999979
AFF4	2100.41	0.00774127	0.118648	0.0652459	0.947978	0.999979
AFG3L2	676.143	0.102941	0.148042	0.695354	0.486833	0.999979
AFTPH	267.067	0.144632	0.107242	1.34865	0.17745	0.999979
AGA	269.994	0.0256235	0.127757	0.200565	0.841039	0.999979
AGAP1	751.749	0.18293	0.161806	1.13055	0.258244	0.999979
AGAP3	491.588	0.0313359	0.106876	0.2932	0.76937	0.999979
AGBL5	726.457	-0.0191599	0.107327	-0.178519	0.858315	0.999979
AGFG1	761.815	0.103997	0.112607	0.92354	0.355726	0.999979
AGFG2	176.94	0.0454132	0.144352	0.3146	0.753066	0.999979
AGGF1	359.557	0.109276	0.104897	1.04175	0.29753	0.999979
AGK	170.004	0.103867	0.115825	0.896759	0.369847	0.999979
AGL	368.121	-0.0454365	0.117393	-0.387045	0.698723	0.999979
AGO1	420.504	-0.02216	0.122849	-0.180385	0.85685	0.999979
AGO2	238.38	-0.0390517	0.128477	-0.303958	0.76116	0.999979
AGO4	275.56	0.0168477	0.121718	0.138415	0.889912	0.999979
AGPAT2	327.011	0.101492	0.114027	0.890066	0.37343	0.999979
AGPAT3	901.535	0.0433491	0.0875642	0.495055	0.620562	0.999979
AGPAT4	258.234	0.126054	0.159242	0.791587	0.428602	0.999979
AGPAT5	217.812	0.194765	0.11322	1.72024	0.085388	0.999979
AGPAT6	964.643	0.057629	0.0986033	0.584453	0.558916	0.999979
AGPS	447.629	-0.0390616	0.0907521	-0.430421	0.666889	0.999979
AGRN	2446.53	0.119609	0.124088	0.963909	0.335092	0.999979
AGTR1	223.915	-0.0609874	0.161646	-0.37729	0.705958	0.999979
AHCTF1	385.978	0.114181	0.122567	0.931579	0.351554	0.999979
AHCY	681.458	0.00476234	0.116705	0.0408066	0.96745	0.999979
AHCYL1	1822.74	0.131994	0.0932532	1.41543	0.156941	0.999979
AHCYL2	195.13	0.108479	0.11573	0.937352	0.348577	0.999979
AHDC1	562.032	-0.189208	0.12039	-1.57162	0.116039	0.999979
AHI1	562.087	0.157714	0.15228	1.03568	0.30035	0.999979
AHNAK	19593.6	-0.109279	0.16248	-0.672567	0.501223	0.999979
AHNAK2	497.209	-0.0337114	0.0786276	-0.428748	0.668107	0.999979
AHR	3487.1	0.0408633	0.16115	0.253574	0.799825	0.999979
AHRR	530.098	-0.131591	0.157058	-0.837851	0.402114	0.999979
AHSA1	604.042	0.0552641	0.0848471	0.651338	0.514828	0.999979
AHSA2	415.538	-0.225638	0.153681	-1.46822	0.142045	0.999979
AIDA	298.613	-0.033368	0.130683	-0.255336	0.798463	0.999979
AIFM1	229.325	0.066016	0.157737	0.41852	0.675567	0.999979
AIFM2	289.954	0.112669	0.162382	0.693849	0.487777	0.999979
AIG1	283.169	0.014026	0.149517	0.093809	0.925261	0.999979
AIM1	257.431	-0.13703	0.161269	-0.849699	0.395492	0.999979
AIMP1	330.433	0.106827	0.129176	0.826993	0.408241	0.999979
AIMP2	179.998	0.0989229	0.12281	0.805494	0.420535	0.999979
AIP	423.767	0.0657483	0.111124	0.591665	0.554075	0.999979
AJUBA	398.392	0.228131	0.160384	1.4224	0.15491	0.999979
AK1	951.053	-0.139766	0.100494	-1.39079	0.164289	0.999979
AK2	653.841	0.106289	0.109701	0.968896	0.332597	0.999979
AK3	1319.13	0.112175	0.135063	0.830536	0.406236	0.999979
AK4	341.495	0.148895	0.15527	0.958947	0.337586	0.999979
AKAP1	243.488	0.010259	0.14012	0.0732156	0.941635	0.999979
AKAP10	334.714	0.122893	0.098809	1.24374	0.213594	0.999979
AKAP11	1746.68	0.0438304	0.136559	0.320964	0.748238	0.999979
AKAP12	960.128	0.156732	0.159856	0.980461	0.326858	0.999979
AKAP13	1094.03	-0.109988	0.0914081	-1.20326	0.228875	0.999979
AKAP8	331.713	-0.118266	0.130957	-0.90309	0.366478	0.999979
AKAP8L	487.6	0.041072	0.111261	0.36915	0.712016	0.999979
AKAP9	1275.87	-0.067478	0.105906	-0.637152	0.524026	0.999979
AKIP1	183.548	0.0144461	0.159079	0.0908112	0.927643	0.999979
AKIRIN1	766.271	0.0512271	0.148254	0.345535	0.729692	0.999979
AKIRIN2	390.442	-0.0504223	0.125462	-0.401893	0.687763	0.999979
AKNA	174.038	-0.0668072	0.16062	-0.415934	0.677459	0.999979
AKR1A1	669.613	-0.0767587	0.0789814	-0.971858	0.331121	0.999979
AKR1B1	2787.13	0.182844	0.159305	1.14775	0.25107	0.999979
AKR1C1	2033.43	0.0746132	0.105392	0.707958	0.478971	0.999979
AKR1C2	575.086	0.0831595	0.151613	0.5485	0.583349	0.999979
AKR1C3	668.357	0.0154072	0.160196	0.0961771	0.92338	0.999979
AKR7A2	420.044	-0.104458	0.123104	-0.84853	0.396143	0.999979
AKT1	1497.35	0.142982	0.069425	2.05952	0.0394441	0.999979
AKT1S1	820.559	0.0387634	0.0820994	0.472152	0.636818	0.999979
AKT2	1222.82	-0.099847	0.10674	-0.935421	0.349571	0.999979
AKT3	798.443	0.045427	0.119296	0.380793	0.703357	0.999979
AKTIP	173.177	0.0803534	0.129296	0.62147	0.53429	0.999979
ALAD	581.622	-0.131973	0.146029	-0.903745	0.366131	0.999979
ALAS1	283.062	-0.0542074	0.160392	-0.337968	0.735387	0.999979
ALCAM	2264.34	0.0127431	0.158383	0.0804575	0.935873	0.999979
ALDH16A1	218.412	-0.0688368	0.135608	-0.507617	0.611722	0.999979
ALDH18A1	1074.73	-0.0529187	0.134138	-0.394511	0.693204	0.999979
ALDH1A3	361.212	-0.111469	0.157752	-0.706608	0.47981	0.999979
ALDH1B1	568.166	-0.0983559	0.159285	-0.617485	0.536915	0.999979
ALDH1L2	791.678	0.0182666	0.152075	0.120116	0.904391	0.999979
ALDH3A2	996.034	0.0267147	0.139431	0.191598	0.848057	0.999979
ALDH3B1	551.273	0.230365	0.14809	1.55558	0.119807	0.999979
ALDH4A1	156.052	-0.100749	0.148228	-0.679689	0.496701	0.999979
ALDH6A1	293.994	0.114082	0.130599	0.873528	0.382375	0.999979
ALDH7A1	518.514	-0.159207	0.10904	-1.46008	0.144268	0.999979
ALDH9A1	849.464	-0.109013	0.110022	-0.990833	0.321767	0.999979
ALDOA	12163.4	0.199812	0.115006	1.73741	0.0823149	0.999979
ALDOC	354.968	0.146833	0.130469	1.12543	0.260409	0.999979
ALG1	246.395	0.0298845	0.159929	0.186862	0.851769	0.999979
ALG12	359.796	0.117659	0.117375	1.00242	0.316142	0.999979
ALG13	284.73	-0.0949616	0.126484	-0.750781	0.452784	0.999979
ALG2	456.573	0.111473	0.120996	0.921296	0.356896	0.999979
ALG3	257.326	0.0849597	0.126012	0.674218	0.500173	0.999979
ALG5	279.974	0.25654	0.119224	2.15175	0.0314174	0.999979
ALG8	201.133	0.051957	0.127461	0.40763	0.683545	0.999979
ALG9	243.47	0.0601932	0.127243	0.473056	0.636173	0.999979
ALKBH5	1041.81	0.123449	0.0924094	1.33589	0.181586	0.999979
ALKBH7	342.709	0.0913633	0.109376	0.835311	0.403543	0.999979
ALMS1	272.821	-0.140725	0.11883	-1.18426	0.236311	0.999979
ALPK1	202.217	-0.116776	0.153551	-0.760504	0.446954	0.999979
ALS2	272.113	-0.0339417	0.109062	-0.311214	0.755638	0.999979
ALYREF	261.965	-0.11617	0.111574	-1.04119	0.297789	0.999979
AMBRA1	287.63	-0.0820773	0.116699	-0.703325	0.481853	0.999979
AMD1	849.917	0.0737432	0.152644	0.483105	0.629021	0.999979
AMFR	1358.94	0.185366	0.103201	1.79616	0.0724686	0.999979
AMMECR1L	405.987	0.131652	0.105074	1.25294	0.210228	0.999979
AMOTL1	1124.44	-0.170298	0.139652	-1.21944	0.222675	0.999979
AMOTL2	1829.15	0.0368938	0.157751	0.233873	0.815083	0.999979
AMPD2	1167.44	0.0380472	0.154469	0.24631	0.805442	0.999979
AMPD3	198.873	0.135077	0.162276	0.832391	0.405188	0.999979
AMZ2	401.187	-0.0585762	0.085651	-0.683893	0.494043	0.999979
ANAPC1	251.437	0.0572353	0.100893	0.567284	0.570521	0.999979
ANAPC11	476.531	0.0284493	0.103263	0.275502	0.78293	0.999979
ANAPC13	512.681	0.0922062	0.131007	0.703826	0.481541	0.999979
ANAPC16	485.867	0.187288	0.120996	1.54788	0.121651	0.999979
ANAPC2	336.634	-0.0477231	0.109034	-0.437691	0.66161	0.999979
ANAPC4	191.762	-0.0896357	0.127928	-0.700671	0.483509	0.999979
ANAPC5	1002.59	-0.0123534	0.091309	-0.135292	0.892381	0.999979
ANAPC7	297.603	0.0450425	0.112027	0.402068	0.687634	0.999979
ANGEL1	184.482	-0.0837578	0.128003	-0.654343	0.512891	0.999979
ANGEL2	250.384	-0.0789935	0.128706	-0.613752	0.539379	0.999979
ANGPT1	3274.6	0.291816	0.153792	1.89747	0.0577654	0.999979
ANGPTL2	2170.1	0.207197	0.159747	1.29703	0.19462	0.999979
ANGPTL4	235.446	0.16373	0.153184	1.06884	0.28514	0.999979
ANK2	285.83	-0.382572	0.155947	-2.45322	0.0141584	0.999979
ANKFY1	963.104	-0.153843	0.0756189	-2.03445	0.0419064	0.999979
ANKH	3850.86	-0.135364	0.150893	-0.897086	0.369673	0.999979
ANKIB1	991.227	0.0142891	0.0833386	0.171459	0.863863	0.999979
ANKLE2	856.673	0.0942404	0.0869076	1.08437	0.278199	0.999979
ANKMY2	192.393	0.108629	0.13283	0.817804	0.413469	0.999979
ANKRA2	204.175	0.0677459	0.121738	0.556489	0.577876	0.999979
ANKRD10	601.746	0.0090501	0.11356	0.0796942	0.93648	0.999979
ANKRD11	1920.34	-0.0100143	0.0964888	-0.103788	0.917338	0.999979
ANKRD12	932.746	0.000146136	0.11362	0.00128618	0.998974	0.999979
ANKRD13A	524.303	-0.0375393	0.141051	-0.266141	0.790131	0.999979
ANKRD13B	174.281	0.0939565	0.137108	0.685275	0.49317	0.999979
ANKRD13C	352.489	-0.03424	0.105909	-0.323296	0.746471	0.999979
ANKRD13D	408.264	0.10196	0.103943	0.98093	0.326627	0.999979
ANKRD17	1149.52	0.0539277	0.107499	0.501657	0.615909	0.999979
ANKRD26	191.065	-0.144293	0.115437	-1.24998	0.211307	0.999979
ANKRD27	256.57	-0.113526	0.104242	-1.08906	0.276127	0.999979
ANKRD28	1207.75	0.027006	0.140073	0.192799	0.847116	0.999979
ANKRD40	546.338	-0.00493155	0.0906936	-0.0543759	0.956636	0.999979
ANKRD42	161.02	-0.0393604	0.13373	-0.294326	0.768509	0.999979
ANKRD50	539.103	-0.0199685	0.131705	-0.151615	0.87949	0.999979
ANKRD52	1029.16	0.00137058	0.130568	0.010497	0.991625	0.999979
ANKRD54	158.153	0.0358396	0.13059	0.274444	0.783744	0.999979
ANKRD9	165.225	0.0178143	0.162458	0.109655	0.912683	0.999979
ANKS1A	268.845	0.043738	0.137306	0.318544	0.750072	0.999979
ANKS3	203.194	-0.0130097	0.150287	-0.0865658	0.931017	0.999979
ANKS6	280.56	0.100973	0.127664	0.790931	0.428984	0.999979
ANKZF1	245.491	0.0171772	0.108947	0.157666	0.87472	0.999979
ANO10	527.004	0.00343435	0.0932913	0.0368131	0.970634	0.999979
ANO6	1025.61	0.0983127	0.0769342	1.27788	0.201292	0.999979
ANO8	393.519	-0.0955219	0.105521	-0.905237	0.36534	0.999979
ANP32A	435.804	0.0871857	0.0985518	0.884669	0.376335	0.999979
ANP32B	1043.61	0.121173	0.139298	0.869883	0.384365	0.999979
ANP32E	371.934	-0.0162063	0.107222	-0.151147	0.87986	0.999979
ANPEP	3020.77	-0.0169217	0.161311	-0.104901	0.916455	0.999979
ANTXR1	5942.89	0.209819	0.156933	1.33699	0.181225	0.999979
ANTXR2	2184.9	0.0245269	0.130413	0.188071	0.850821	0.999979
ANXA1	3399.14	-0.0809206	0.15304	-0.528755	0.596975	0.999979
ANXA11	1545.95	-0.0853072	0.123402	-0.691293	0.489381	0.999979
ANXA2	5904.14	-0.0969383	0.161727	-0.599394	0.54891	0.999979
ANXA2P2	3613	-0.0822476	0.161119	-0.510476	0.609718	0.999979
ANXA4	585.124	-0.135836	0.155711	-0.87236	0.383012	0.999979
ANXA5	5612.7	-0.0575784	0.137647	-0.418305	0.675724	0.999979
ANXA6	3125.25	-0.0773001	0.120487	-0.641564	0.521156	0.999979
ANXA7	1064.62	-0.0680131	0.107045	-0.635372	0.525186	0.999979
AOX1	662.166	0.273277	0.149987	1.82201	0.0684536	0.999979
AP1AR	190.549	0.0465259	0.133597	0.348256	0.727648	0.999979
AP1B1	599.218	0.00676177	0.11065	0.0611094	0.951272	0.999979
AP1G1	851.983	-0.0355874	0.10079	-0.353084	0.724026	0.999979
AP1G2	318.448	-0.241049	0.150398	-1.60274	0.108992	0.999979
AP1M1	558.892	-0.0149421	0.106287	-0.140582	0.8882	0.999979
AP1S1	504.3	0.0267377	0.115899	0.230697	0.81755	0.999979
AP1S2	169.128	0.0465135	0.162475	0.28628	0.774663	0.999979
AP2A1	1645.21	0.0273681	0.123738	0.221177	0.824955	0.999979
AP2A2	694.895	0.0612623	0.125299	0.488928	0.624893	0.999979
AP2B1	2110.69	-0.0547999	0.0940251	-0.582822	0.560013	0.999979
AP2M1	3457.21	0.111318	0.113815	0.978058	0.328046	0.999979
AP2S1	858.432	0.00536048	0.0729169	0.0735149	0.941396	0.999979
AP3B1	609.563	-0.0429052	0.125392	-0.342169	0.732224	0.999979
AP3D1	1828.01	-0.0294484	0.071897	-0.409592	0.682105	0.999979
AP3M1	445.361	-0.0448198	0.0925605	-0.484222	0.628228	0.999979
AP3S1	785.293	0.0234037	0.117053	0.199941	0.841527	0.999979
AP4E1	276.158	0.107464	0.111306	0.965483	0.334303	0.999979
AP4M1	188.182	-0.041846	0.143101	-0.292422	0.769964	0.999979
AP5B1	253.049	0.0035115	0.141311	0.0248494	0.980175	0.999979
AP5M1	289.427	-0.00667458	0.141073	-0.0473129	0.962264	0.999979
AP5Z1	371.255	-0.176175	0.0959881	-1.83538	0.0664491	0.999979
APAF1	230.919	-0.0967248	0.130914	-0.738843	0.460002	0.999979
APBA2	190.162	0.130065	0.161027	0.80772	0.419252	0.999979
APBA3	159.751	0.0705371	0.14346	0.491686	0.622941	0.999979
APBB1	561.737	0.112815	0.110397	1.0219	0.30683	0.999979
APBB1IP	441.135	-0.109642	0.147817	-0.741743	0.458243	0.999979
APBB2	568.123	-0.0705285	0.142886	-0.493601	0.621588	0.999979
APBB3	213.126	-0.242012	0.145038	-1.66862	0.0951933	0.999979
APC	441.736	-0.0902398	0.116381	-0.77538	0.438115	0.999979
APCDD1L	1033.43	0.0182115	0.159261	0.11435	0.908961	0.999979
APEH	689.471	0.129075	0.110106	1.17228	0.241083	0.999979
APEX1	1382.71	0.0770005	0.0928427	0.829365	0.406898	0.999979
APH1A	972.935	0.0444805	0.0945613	0.470388	0.638078	0.999979
APH1B	261.72	-0.0883279	0.134971	-0.654422	0.51284	0.999979
API5	787.831	0.109574	0.0953169	1.14957	0.250321	0.999979
APIP	183.85	0.237808	0.128675	1.84814	0.0645828	0.999979
APLP2	7287.72	0.0550966	0.0828126	0.665318	0.505847	0.999979
APMAP	1144.79	0.0935112	0.142815	0.654773	0.512614	0.999979
APOA1BP	344.811	0.0115429	0.13028	0.0886005	0.929399	0.999979
APOBEC3C	417.923	-0.143725	0.14712	-0.976921	0.328608	0.999979
APOL1	343.224	-0.112079	0.157024	-0.713773	0.475368	0.999979
APOL2	329.99	-0.125242	0.146985	-0.852072	0.394174	0.999979
APOL6	371.11	0.00268972	0.162476	0.0165545	0.986792	0.999979
APOOL	246.787	0.0604433	0.113024	0.534784	0.592799	0.999979
APOPT1	220.917	0.154186	0.119006	1.29562	0.195106	0.999979
APP	11893.6	0.0332457	0.135569	0.245231	0.806278	0.999979
APPBP2	556.763	-0.0965287	0.0948587	-1.01761	0.308866	0.999979
APPL1	484.757	-0.0775428	0.134411	-0.57691	0.564	0.999979
APPL2	947.527	-0.162836	0.113099	-1.43977	0.149933	0.999979
APRT	522.281	-0.119752	0.0993782	-1.20501	0.228199	0.999979
APTX	213.34	-0.0770307	0.115396	-0.667534	0.504431	0.999979
AQR	319.855	-0.0227493	0.106877	-0.212855	0.83144	0.999979
AR	196.591	-0.0421363	0.152655	-0.276023	0.78253	0.999979
ARAF	583.957	-0.0199881	0.105665	-0.189165	0.849964	0.999979
ARAP1	1332.62	-0.0446117	0.104381	-0.427393	0.669093	0.999979
ARAP3	184.862	0.0948131	0.160114	0.592161	0.553743	0.999979
ARC	370.852	0.0546031	0.113069	0.482919	0.629153	0.999979
ARCN1	2426.16	0.00792492	0.0853659	0.0928347	0.926035	0.999979
AREL1	414.506	0.13547	0.102259	1.32477	0.185248	0.999979
ARF1	3521.69	0.0768127	0.0718184	1.06954	0.284826	0.999979
ARF3	1498.32	0.0293662	0.105683	0.27787	0.781112	0.999979
ARF4	3288.62	0.0832856	0.124307	0.669997	0.50286	0.999979
ARF5	900.298	-0.0423558	0.116618	-0.3632	0.716455	0.999979
ARF6	1220.2	-0.00592357	0.144767	-0.0409179	0.967361	0.999979
ARFGAP1	989.53	-0.12453	0.138383	-0.899893	0.368177	0.999979
ARFGAP2	572.899	-0.0051402	0.0889293	-0.057801	0.953907	0.999979
ARFGAP3	676.96	0.0261283	0.117765	0.221867	0.824417	0.999979
ARFGEF1	542.199	-0.0254846	0.105445	-0.241687	0.809023	0.999979
ARFGEF2	766.966	0.0544553	0.119414	0.456022	0.648374	0.999979
ARFIP1	410.087	0.0683371	0.129441	0.527939	0.597542	0.999979
[truncated: 25,750 more rows]

## Sheet: Supplementary Table 6e
Supplementary Table 6 - RNA sequencing of MSC responses to breast cancer secretomes
[truncated: 26,217 more rows]

[truncated: 1 more sheets: Supplementary Table 6f]
