# Supplementary material for: Mesenchymal stromal cell activation by breast cancer secretomes in bioengineered 3D microenvironments
Source: Life Sci Alliance. 2019 Jun 3;2(3):e201900304. doi: 10.26508/lsa.201900304 (PMC6549139; doi:10.26508/lsa.201900304)
Supplement: Supplementary file 9 [file LSA-2019-00304_SdataFS5a.xlsx]

## Sheet: Fig.S5A
	Source data
	Fig. S5A
	Relative gene expression
	CXCL1	MSC donor 1	MSC donor 2	MSC donor 3	MSC donor 4		MMP1	MSC donor 1	MSC donor 2	MSC donor 3	MSC donor 4
	MDA-WT	94.3011	50.8947	117.346	53.523		MDA-WT	91.4456	48.5618	193.264	20.9783
	MCF-7	3.22584	1.04267	2.72004	0.777682		MCF-7	1.63723	0.923741	4.93162	1.05552
	control	1	1	1	1		control	1	1	1	1
	CXCL2	MSC donor 1	MSC donor 2	MSC donor 3	MSC donor 4		MMP3	MSC donor 1	MSC donor 2	MSC donor 3	MSC donor 4
	MDA-WT	6.68727	3.87049	6.56155	6.69823		MDA-WT	288.225	230.402	397.345	151.359
	MCF-7	1.44179	1.40535	1.08235	0.890858		MCF-7	1.95526	1.94216	7.24441	1.05727
	control	1	1	1	1		control	1	1	1	1
	CXCL3	MSC donor 1	MSC donor 2	MSC donor 3	MSC donor 4		MMP8	MSC donor 1	MSC donor 2	MSC donor 3	MSC donor 4
	MDA-WT	8.12204	5.39338	10.1969	9.52455		MDA-WT	73.6697		155.594	354.347
	MCF-7	1.22607	1.25812	1.17251	1.21491		MCF-7	0.679742		1.37556	1.87682
	control	1	1	1	1		control	1	nd	1	1
	CXCL5	MSC donor 1	MSC donor 2	MSC donor 3	MSC donor 4		MMP9	MSC donor 1	MSC donor 2	MSC donor 3	MSC donor 4
	MDA-WT	75.193	40.0817	77.5462	54.4086		MDA-WT	10.0374	7.78635	7.89047	9.06458
	MCF-7	1.30534	0.956658	2.20852	0.772493		MCF-7	1.18701	0.906836	1.65871	1.08669
	control	1	1	1	1		control	1	1	1	1
	CXCL8	MSC donor 1	MSC donor 2	MSC donor 3	MSC donor 4		MMP13	MSC donor 1	MSC donor 2	MSC donor 3	MSC donor 4
	MDA-WT	50.5589	29.3874	82.1261	49.1598		MDA-WT	6.08919	28.1044	4.86301	18.3376
	MCF-7	1.42437	1.05572	1.35202	0.881218		MCF-7	0.918191	1.56805	0.794817	1.03646
	control	1	1	1	1		control	1	1	1	1
