# Supplementary material for: Mesenchymal stromal cell activation by breast cancer secretomes in bioengineered 3D microenvironments
Source: Life Sci Alliance. 2019 Jun 3;2(3):e201900304. doi: 10.26508/lsa.201900304 (PMC6549139; doi:10.26508/lsa.201900304)
Supplement: Supplementary file 10 [file LSA-2019-00304_SdataFS5b.xlsx]

## Sheet: Fig.S5B
	Source data
	Fig. S5B
	Relative gene expression
	PFKP	MSC donor 1	MSC donor 2	MSC donor 3	MSC donor 4
	MDA-WT	1.04802	1.63836	0.970589	1.41435
	MDA-Bone	1.58269	2.74118	1.40717	1.95692
	MCF-7	0.920046	1.20777	1.02139	1.09879
	control	1	1	1	1
	LDHA	MSC donor 1	MSC donor 2	MSC donor 3	MSC donor 4
	MDA-WT	1.31531	1.5818	1.17671	1.1999
	MDA-Bone	1.6946	2.08264	1.50216	1.64787
	MCF-7	0.927671	1.09472	0.920355	0.989233
	control	1	1	1	1
	SLC39A14	MSC donor 1	MSC donor 2	MSC donor 3	MSC donor 4
	MDA-WT	4.15126	3.4601	3.76421	2.73853
	MDA-Bone	4.94484	8.84877	4.94887	5.39207
	MCF-7	0.90595	1.36343	0.986252	1.07192
	control	1	1	1	1
	SLC39A8	MSC donor 1	MSC donor 2	MSC donor 3	MSC donor 4
	MDA-WT	5.01837	4.61811	9.92583	5.25709
	MDA-Bone	7.68455	10.7649	16.9158	9.40542
	MCF-7	1.04661	1.34035	1.07258	1.31333
	control	1	1	1	1
