# Supplementary material for: Mesenchymal stromal cell activation by breast cancer secretomes in bioengineered 3D microenvironments
Source: Life Sci Alliance. 2019 Jun 3;2(3):e201900304. doi: 10.26508/lsa.201900304 (PMC6549139; doi:10.26508/lsa.201900304)
Supplement: Supplementary file 11 [file LSA-2019-00304_SdataF5c.xlsx]

## Sheet: Fig.5C
	Source data
	Fig. 5C
	Invaded area in µm2
		negative control	MDA-WT secretome	MCF-7 secretome	PDGF-BB
	MSC donor 1	13551.5	14738.7	30493.1	245183
		14206.6	48302.8	41277
		45494	21107.1	21374.9
		22505.5	7037.18	51768.5
	MSC donor 2	72461	57991.3	55158.5
		31926.9	87265.5	84471.4
		37243.5	67744.4	65320
		60865.2	79510.8	83818.4
	MSC donor 3	9164.14	22816	19436.8
		27232.6	14132.2	34433.5
		27981.4	24876	7369.33
		9520.59	34006.9	53435.5
