# Supplementary material for: Mesenchymal stromal cell activation by breast cancer secretomes in bioengineered 3D microenvironments
Source: Life Sci Alliance. 2019 Jun 3;2(3):e201900304. doi: 10.26508/lsa.201900304 (PMC6549139; doi:10.26508/lsa.201900304)
Supplement: Supplementary file 12 [file LSA-2019-00304_SdataF5d.xlsx]

## Sheet: Fig.5D
	Source data
	Fig. 5D
	Relative gene expression
	TNF	Exp 1	Exp 2	Exp 3	Exp 4
	control	1	1	1	1
	CM MCF-7	1.32382	1.35158	1.22852	0.894626
	CM MDA-WT	1.37979	0.985792	1.0871	1.03743
	MSC	1.25258	1.20568	1.4466	0.820945
	CM MSC-MCF-7	1.19403	1.11066	1.15849	0.840672
	CM MSC-MDA-WT	1.46999	1.7467	1.91761	1.8643
	IL10	Exp 1	Exp 2	Exp 3	Exp 4
	control	1	1	1	1
	CM MCF-7	0.931161	0.733051	0.907714	0.615882
	CM MDA-WT	0.881052	0.517744	1.58649	0.57462
	MSC	1.58199	0.545639	0.771741	0.571127
	CM MSC-MCF-7	0.997127	0.799583	0.830863	1.33743
	CM MSC-MDA-WT	3.34635	3.60319	4.66435	5.61718
	Il1B	Exp 1	Exp 2	Exp 3	Exp 4
	control	1	1	1	1
	CM MCF-7	1.29135	1.04954	1.83619	0.892087
	CM MDA-WT	1.33326	1.18728	1.16306	0.97476
	MSC	1.67748	1.47247	1.46107	0.832643
	CM MSC-MCF-7	1.81906	1.38061	1.39641	0.804634
	CM MSC-MDA-WT	2.41514	4.11926	5.44542	4.15444
	TGFB1	Exp 1	Exp 2	Exp 3	Exp 4
	control	1	1	1	1
	CM MCF-7	0.88921	0.844588	0.681175	0.559026
	CM MDA-WT	0.950716	0.786181	1.11403	0.627405
	MSC	1.76023	1.14337	1.80536	0.773092
	CM MSC-MCF-7	1.12838	1.36873	1.15525	0.895657
	CM MSC-MDA-WT	1.15902	1.4451	1.04569	0.910944
